# Supplementary material for: Genome-scale approaches for discovering novel nonconventional splicing substrates of the Ire1 nuclease
Source: PubMed Central journal article supplement (PMC549064; doi:10.1186/gb-2004-6-1-r3), 2004-12-22
Supplement: gb-2004-6-1-r3-s1.pdf [file gb-2004-6-1-r3-s1.pdf]

Niwa et al.

Supplementary Table 1

| ID      | Name   | F532=X | F635=Y | (X/Y) | log2(X/Y) | X/Y)-mean(log2(X/Y)) | Nsigma |
|---------|--------|--------|--------|-------|-----------|----------------------|--------|
| YFL031W |        | 13891  | 2670   | 5.20  | 2.38      | 2.32                 | 5.61   |
| YJR112W | NNF1   | 1116   | 342    | 3.26  | 1.71      | 1.65                 | 3.99   |
| YER150W | SPI1   | 798    | 254    | 3.14  | 1.65      | 1.60                 | 3.85   |
| YPR186C | PZF1   | 7752   | 2528   | 3.07  | 1.62      | 1.56                 | 3.77   |
| YNL304W | YPT11  | 1581   | 549    | 2.88  | 1.53      | 1.47                 | 3.55   |
| YGL208W | SIP2   | 1125   | 399    | 2.82  | 1.50      | 1.44                 | 3.48   |
| YLR298C | YHC1   | 1109   | 394    | 2.82  | 1.49      | 1.44                 | 3.47   |
| YJR107W |        | 964    | 350    | 2.75  | 1.46      | 1.41                 | 3.39   |
| YPR005C | HAL1   | 1122   | 421    | 2.67  | 1.41      | 1.36                 | 3.28   |
| YOR122C | PFY1   | 2574   | 986    | 2.61  | 1.38      | 1.33                 | 3.21   |
| YHL028W | WSC4   | 2290   | 889    | 2.58  | 1.36      | 1.31                 | 3.16   |
| YKLO07W | CAP1   | 918    | 364    | 2.52  | 1.33      | 1.28                 | 3.09   |
| YJR162C |        | 1911   | 760    | 2.51  | 1.33      | 1.27                 | 3.08   |
| YPL067C |        | 694    | 276    | 2.51  | 1.33      | 1.27                 | 3.08   |
| YOR312C | RPL20B | 1080   | 436    | 2.48  | 1.31      | 1.25                 | 3.02   |
| YHL018W |        | 1325   | 538    | 2.46  | 1.30      | 1.24                 | 3.00   |
| YGR292W | MAL12  | 2503   | 1039   | 2.41  | 1.27      | 1.21                 | 2.93   |
| YNL130C | CPT1   | 757    | 316    | 2.39  | 1.26      | 1.20                 | 2.91   |
| YJL144W |        | 1399   | 585    | 2.39  | 1.26      | 1.20                 | 2.90   |
| YHR150W |        | 1206   | 505    | 2.39  | 1.26      | 1.20                 | 2.90   |
| YFL045C | SEC53  | 2536   | 1070   | 2.37  | 1.24      | 1.19                 | 2.87   |
| YPR006C | ICL2   | 1173   | 498    | 2.36  | 1.24      | 1.18                 | 2.85   |
| YKRO38C |        | 2172   | 927    | 2.34  | 1.23      | 1.17                 | 2.83   |
| YOR078W |        | 1856   | 795    | 2.33  | 1.22      | 1.17                 | 2.82   |
| YMR041C |        | 628    | 271    | 2.32  | 1.21      | 1.16                 | 2.79   |
| YOR091W |        | 6474   | 2802   | 2.31  | 1.21      | 1.15                 | 2.78   |
| YPL224C | MMT2   | 614    | 266    | 2.31  | 1.21      | 1.15                 | 2.78   |
| YMR296C | LCB1   | 2210   | 959    | 2.30  | 1.20      | 1.15                 | 2.77   |
| YPL068C |        | 615    | 267    | 2.30  | 1.20      | 1.15                 | 2.77   |
| YOL053W |        | 2021   | 888    | 2.28  | 1.19      | 1.13                 | 2.73   |

|           |        |      |      |      |      |      |      |
|-----------|--------|------|------|------|------|------|------|
| YJR146W   |        | 622  | 274  | 2.27 | 1.18 | 1.13 | 2.72 |
| YJR063W   | RPA12  | 953  | 420  | 2.27 | 1.18 | 1.13 | 2.72 |
| YLR254C   |        | 1000 | 441  | 2.27 | 1.18 | 1.13 | 2.72 |
| YDL244W   | THI13  | 1062 | 470  | 2.26 | 1.18 | 1.12 | 2.70 |
| YHL014C   | YLF2   | 787  | 349  | 2.26 | 1.17 | 1.12 | 2.70 |
| YJR060W   | CBF1   | 751  | 336  | 2.23 | 1.16 | 1.10 | 2.67 |
| YJL111W   | CCT7   | 9550 | 4295 | 2.22 | 1.15 | 1.10 | 2.65 |
| YKR068C   | BET3   | 1353 | 612  | 2.21 | 1.14 | 1.09 | 2.63 |
| YMR236W   | TAF17  | 937  | 425  | 2.21 | 1.14 | 1.08 | 2.62 |
| YOR319W   | HSH49  | 740  | 336  | 2.20 | 1.14 | 1.08 | 2.61 |
| YLR313C   | SPH1   | 1162 | 530  | 2.19 | 1.13 | 1.08 | 2.60 |
| YNL230C   | ELA1   | 1074 | 494  | 2.17 | 1.12 | 1.06 | 2.57 |
| YDL023C   |        | 994  | 458  | 2.17 | 1.12 | 1.06 | 2.56 |
| YML021C   | UNG1   | 1928 | 891  | 2.16 | 1.11 | 1.06 | 2.55 |
| YLL002W   | KIM2   | 964  | 446  | 2.16 | 1.11 | 1.06 | 2.55 |
| YJL060W   |        | 1625 | 752  | 2.16 | 1.11 | 1.06 | 2.55 |
| YLR029C   | RPL15A | 9235 | 4292 | 2.15 | 1.11 | 1.05 | 2.53 |
| YAL049C   |        | 1964 | 915  | 2.15 | 1.10 | 1.05 | 2.53 |
| YDR284C   | DPP1   | 4995 | 2338 | 2.14 | 1.10 | 1.04 | 2.51 |
| YLL065W   | GIN11  | 1470 | 689  | 2.13 | 1.09 | 1.04 | 2.50 |
| YFL063W   |        | 2410 | 1136 | 2.12 | 1.08 | 1.03 | 2.48 |
| YKL225W   |        | 1265 | 597  | 2.12 | 1.08 | 1.03 | 2.48 |
| YHR081W   |        | 2797 | 1321 | 2.12 | 1.08 | 1.03 | 2.48 |
| YOR076C   |        | 915  | 433  | 2.11 | 1.08 | 1.02 | 2.47 |
| YIL136W   | OM45   | 777  | 368  | 2.11 | 1.08 | 1.02 | 2.47 |
| YER175C   |        | 1139 | 541  | 2.11 | 1.07 | 1.02 | 2.46 |
| YNL338W   |        | 3733 | 1775 | 2.10 | 1.07 | 1.02 | 2.45 |
| YER159C   | BUR6   | 2119 | 1008 | 2.10 | 1.07 | 1.02 | 2.45 |
| YBR032W   |        | 792  | 379  | 2.09 | 1.06 | 1.01 | 2.43 |
| YHR158C   | KEL1   | 1097 | 528  | 2.08 | 1.05 | 1.00 | 2.41 |
| YOR236W   | DFR1   | 1863 | 897  | 2.08 | 1.05 | 1.00 | 2.41 |
| YDL230W   | PTP1   | 1154 | 556  | 2.08 | 1.05 | 1.00 | 2.41 |
| YOR106W   | VAM3   | 1517 | 732  | 2.07 | 1.05 | 1.00 | 2.40 |
| YJR094W-A | RPL43B | 1510 | 729  | 2.07 | 1.05 | 0.99 | 2.40 |
| YNL074C   | MLF3   | 1193 | 576  | 2.07 | 1.05 | 0.99 | 2.40 |
| YER116C   |        | 1557 | 753  | 2.07 | 1.05 | 0.99 | 2.40 |

|           |           |      |      |      |      |      |      |
|-----------|-----------|------|------|------|------|------|------|
| YHL002W   |           | 1561 | 755  | 2.07 | 1.05 | 0.99 | 2.39 |
| YNL240C   | NAR1      | 581  | 282  | 2.06 | 1.04 | 0.99 | 2.38 |
| YDL070W   | BDF2      | 2436 | 1186 | 2.05 | 1.04 | 0.98 | 2.37 |
| YJL194W   | CDC6      | 621  | 304  | 2.04 | 1.03 | 0.97 | 2.35 |
| YLR301W   |           | 2345 | 1148 | 2.04 | 1.03 | 0.97 | 2.35 |
| YJL108C   |           | 553  | 271  | 2.04 | 1.03 | 0.97 | 2.35 |
| YLR041W   |           | 736  | 363  | 2.03 | 1.02 | 0.96 | 2.33 |
| YIL154C   | IMP2'     | 517  | 255  | 2.03 | 1.02 | 0.96 | 2.33 |
| YLR231C   |           | 1642 | 810  | 2.03 | 1.02 | 0.96 | 2.33 |
| YDR051C   |           | 1992 | 984  | 2.02 | 1.02 | 0.96 | 2.32 |
| YER056C-A | RPL34A    | 946  | 468  | 2.02 | 1.01 | 0.96 | 2.32 |
| YNL100W   |           | 1917 | 949  | 2.02 | 1.01 | 0.96 | 2.31 |
| YBL080C   | PET112    | 1688 | 836  | 2.02 | 1.01 | 0.96 | 2.31 |
| YIL172C   |           | 1093 | 542  | 2.02 | 1.01 | 0.96 | 2.31 |
| YOR298C-A | YOR298C-A | 1189 | 590  | 2.02 | 1.01 | 0.95 | 2.31 |
| YKR026C   | GCN3      | 823  | 409  | 2.01 | 1.01 | 0.95 | 2.30 |
| YHL016C   | DUR3      | 1920 | 954  | 2.01 | 1.01 | 0.95 | 2.30 |
| YMR240C   | CUS1      | 3308 | 1644 | 2.01 | 1.01 | 0.95 | 2.30 |
| YHL031C   | GOS1      | 1343 | 668  | 2.01 | 1.01 | 0.95 | 2.30 |
| YHR013C   | ARD1      | 1980 | 990  | 2.00 | 1.00 | 0.94 | 2.28 |
| YOL052C   | SPE2      | 3027 | 1514 | 2.00 | 1.00 | 0.94 | 2.28 |
| YDR274C   |           | 880  | 441  | 2.00 | 1.00 | 0.94 | 2.27 |
| YGR294W   |           | 821  | 412  | 1.99 | 0.99 | 0.94 | 2.27 |
| YPL111W   | CAR1      | 1464 | 737  | 1.99 | 0.99 | 0.93 | 2.26 |
| YLR126C   |           | 654  | 331  | 1.98 | 0.98 | 0.93 | 2.24 |
| YLR353W   | BUD8      | 809  | 411  | 1.97 | 0.98 | 0.92 | 2.22 |
| YNL241C   | ZWF1      | 1770 | 902  | 1.96 | 0.97 | 0.92 | 2.21 |
| YFRO23W   | PES4      | 918  | 468  | 1.96 | 0.97 | 0.92 | 2.21 |
| YOR052C   |           | 1003 | 513  | 1.95 | 0.97 | 0.91 | 2.20 |
| YLR374C   |           | 1304 | 668  | 1.95 | 0.97 | 0.91 | 2.20 |
| YML008C   | ERG6      | 3941 | 2020 | 1.95 | 0.96 | 0.91 | 2.19 |
| YDL091C   |           | 815  | 418  | 1.95 | 0.96 | 0.91 | 2.19 |
| YNL057W   |           | 866  | 445  | 1.95 | 0.96 | 0.90 | 2.18 |
| YML064C   | TEM1      | 816  | 421  | 1.94 | 0.95 | 0.90 | 2.17 |
| YHL017W   |           | 2758 | 1424 | 1.94 | 0.95 | 0.90 | 2.17 |
| YPRO78C   |           | 5448 | 2813 | 1.94 | 0.95 | 0.90 | 2.17 |

|             |             |      |      |      |      |      |      |
|-------------|-------------|------|------|------|------|------|------|
| YDR075W     | PPH3        | 3237 | 1673 | 1.93 | 0.95 | 0.90 | 2.16 |
| YAR031W     |             | 928  | 480  | 1.93 | 0.95 | 0.89 | 2.16 |
| YGR286C     | BIO2        | 1920 | 994  | 1.93 | 0.95 | 0.89 | 2.16 |
| YJR044C     |             | 1675 | 867  | 1.93 | 0.95 | 0.89 | 2.16 |
| YBL109W     |             | 3844 | 1993 | 1.93 | 0.95 | 0.89 | 2.15 |
| YLR317W     |             | 739  | 384  | 1.92 | 0.94 | 0.89 | 2.14 |
| YOL038W     | PRE6        | 2809 | 1463 | 1.92 | 0.94 | 0.89 | 2.14 |
| YMRWdelta16 | YMRWdelta16 | 495  | 258  | 1.92 | 0.94 | 0.88 | 2.14 |
| YNL159C     |             | 1359 | 708  | 1.92 | 0.94 | 0.88 | 2.14 |
| YBR061C     |             | 1089 | 569  | 1.91 | 0.94 | 0.88 | 2.12 |
| YKR100C     |             | 1539 | 806  | 1.91 | 0.93 | 0.88 | 2.12 |
| YDL218W     |             | 1487 | 779  | 1.91 | 0.93 | 0.88 | 2.12 |
| YER100W     | UBC6        | 2018 | 1059 | 1.91 | 0.93 | 0.87 | 2.11 |
| YLR427W     |             | 1484 | 779  | 1.91 | 0.93 | 0.87 | 2.11 |
| YMR271C     | URA10       | 2614 | 1372 | 1.91 | 0.93 | 0.87 | 2.11 |
| YMR203W     | TOM40       | 1061 | 557  | 1.90 | 0.93 | 0.87 | 2.11 |
| YLR358C     |             | 2109 | 1110 | 1.90 | 0.93 | 0.87 | 2.10 |
| YNL142W     | MEP2        | 961  | 506  | 1.90 | 0.93 | 0.87 | 2.10 |
| YNL236W     | SIN4        | 1101 | 580  | 1.90 | 0.92 | 0.87 | 2.10 |
| YMR042W     | ARG80       | 1276 | 673  | 1.90 | 0.92 | 0.87 | 2.09 |
| YHR142W     | CHS7        | 1131 | 597  | 1.89 | 0.92 | 0.87 | 2.09 |
| YGL160W     |             | 2881 | 1522 | 1.89 | 0.92 | 0.86 | 2.09 |
| YPL229W     |             | 1546 | 818  | 1.89 | 0.92 | 0.86 | 2.08 |
| YEL016C     |             | 1483 | 785  | 1.89 | 0.92 | 0.86 | 2.08 |
| YER161C     | SPT2        | 5518 | 2937 | 1.88 | 0.91 | 0.85 | 2.06 |
| YDR044W     | HEM13       | 712  | 379  | 1.88 | 0.91 | 0.85 | 2.06 |
| YDR020C     |             | 591  | 315  | 1.88 | 0.91 | 0.85 | 2.06 |
| YNL063W     |             | 2764 | 1474 | 1.88 | 0.91 | 0.85 | 2.06 |
| YFR028C     | CDC14       | 2686 | 1433 | 1.87 | 0.91 | 0.85 | 2.05 |
| YMR010W     |             | 1690 | 902  | 1.87 | 0.91 | 0.85 | 2.05 |
| YIL108W     |             | 1700 | 911  | 1.87 | 0.90 | 0.84 | 2.04 |
| YJL097W     |             | 1566 | 841  | 1.86 | 0.90 | 0.84 | 2.03 |
| YER024W     |             | 1223 | 657  | 1.86 | 0.90 | 0.84 | 2.03 |
| YHL032C     | GUT1        | 1394 | 750  | 1.86 | 0.89 | 0.84 | 2.02 |
| YGL158W     | RCK1        | 526  | 283  | 1.86 | 0.89 | 0.84 | 2.02 |
| YHR175W     | CTR2        | 832  | 448  | 1.86 | 0.89 | 0.84 | 2.02 |

|         |        |      |      |      |      |      |      |
|---------|--------|------|------|------|------|------|------|
| YER177W | BMH1   | 4066 | 2195 | 1.85 | 0.89 | 0.83 | 2.01 |
| YML019W | OST6   | 1527 | 826  | 1.85 | 0.89 | 0.83 | 2.00 |
| YKR105C |        | 584  | 316  | 1.85 | 0.89 | 0.83 | 2.00 |
| YCRO56W |        | 2262 | 1225 | 1.85 | 0.88 | 0.83 | 2.00 |
| YPL254W | HFI1   | 1355 | 734  | 1.85 | 0.88 | 0.83 | 2.00 |
| YHL033C | RPL8A  | 5422 | 2944 | 1.84 | 0.88 | 0.82 | 1.99 |
| YHR012W | VPS29  | 3153 | 1712 | 1.84 | 0.88 | 0.82 | 1.99 |
| YKL154W | SRP102 | 984  | 535  | 1.84 | 0.88 | 0.82 | 1.99 |
| YOL065C | INP54  | 983  | 535  | 1.84 | 0.88 | 0.82 | 1.98 |
| YGR287C |        | 786  | 428  | 1.84 | 0.88 | 0.82 | 1.98 |
| YELO62W | NPR2   | 1179 | 643  | 1.83 | 0.88 | 0.82 | 1.98 |
| YLR264W | RPS28B | 9596 | 5238 | 1.83 | 0.87 | 0.82 | 1.97 |
| YJL145W |        | 1254 | 685  | 1.83 | 0.87 | 0.82 | 1.97 |
| YLR125W |        | 762  | 416  | 1.83 | 0.87 | 0.82 | 1.97 |
| YGR280C |        | 2301 | 1260 | 1.83 | 0.87 | 0.81 | 1.96 |
| YLR297W |        | 1022 | 561  | 1.82 | 0.87 | 0.81 | 1.95 |
| YKRO12C |        | 1488 | 818  | 1.82 | 0.86 | 0.81 | 1.95 |
| YOR377W | ATF1   | 2278 | 1253 | 1.82 | 0.86 | 0.81 | 1.95 |
| YKL124W | SSH4   | 932  | 513  | 1.82 | 0.86 | 0.81 | 1.95 |
| YLR369W | SSQ1   | 539  | 297  | 1.81 | 0.86 | 0.80 | 1.94 |
| YHL046C |        | 710  | 392  | 1.81 | 0.86 | 0.80 | 1.93 |
| YOL062C | APM4   | 2919 | 1613 | 1.81 | 0.86 | 0.80 | 1.93 |
| YMR208W | ERG12  | 2707 | 1497 | 1.81 | 0.85 | 0.80 | 1.93 |
| YNL053W | MSG5   | 484  | 268  | 1.81 | 0.85 | 0.80 | 1.93 |
| YMR255W | GFD1   | 728  | 403  | 1.81 | 0.85 | 0.80 | 1.92 |
| YPL112C |        | 1379 | 765  | 1.80 | 0.85 | 0.79 | 1.92 |
| YPR196W |        | 1135 | 630  | 1.80 | 0.85 | 0.79 | 1.91 |
| YOL069W | NUF2   | 1127 | 626  | 1.80 | 0.85 | 0.79 | 1.91 |
| YDL234C | GYP7   | 1699 | 944  | 1.80 | 0.85 | 0.79 | 1.91 |
| YJL172W | CPS1   | 1782 | 991  | 1.80 | 0.85 | 0.79 | 1.91 |
| YCLX09W |        | 1521 | 846  | 1.80 | 0.85 | 0.79 | 1.91 |
| YCRO22C |        | 1529 | 851  | 1.80 | 0.85 | 0.79 | 1.91 |
| YIL152W |        | 487  | 271  | 1.80 | 0.84 | 0.79 | 1.90 |
| YOL031C |        | 1877 | 1046 | 1.79 | 0.84 | 0.79 | 1.90 |
| YLR090W | XDJ1   | 2338 | 1307 | 1.79 | 0.84 | 0.78 | 1.89 |
| YNL085W | MKT1   | 3434 | 1920 | 1.79 | 0.84 | 0.78 | 1.89 |

|         |       |       |      |      |      |      |      |
|---------|-------|-------|------|------|------|------|------|
| YIL124W | AYR1  | 785   | 439  | 1.79 | 0.84 | 0.78 | 1.89 |
| YJL208C | NUC1  | 2603  | 1458 | 1.79 | 0.84 | 0.78 | 1.88 |
| YJL113W |       | 1081  | 606  | 1.78 | 0.84 | 0.78 | 1.88 |
| YNL131W | TOM22 | 1570  | 881  | 1.78 | 0.83 | 0.78 | 1.88 |
| YOL059W | GPD2  | 1945  | 1091 | 1.78 | 0.83 | 0.78 | 1.88 |
| YIL135C |       | 2000  | 1124 | 1.78 | 0.83 | 0.78 | 1.87 |
| YLR429W | CRN1  | 4573  | 2572 | 1.78 | 0.83 | 0.77 | 1.87 |
| YER130C |       | 1311  | 738  | 1.78 | 0.83 | 0.77 | 1.87 |
| YOR047C | STD1  | 1965  | 1106 | 1.78 | 0.83 | 0.77 | 1.87 |
| YER145C | FTR1  | 3349  | 1886 | 1.78 | 0.83 | 0.77 | 1.87 |
| YGL157W |       | 1683  | 948  | 1.78 | 0.83 | 0.77 | 1.86 |
| YILO89W |       | 708   | 399  | 1.78 | 0.83 | 0.77 | 1.86 |
| YMR085W |       | 13515 | 7614 | 1.78 | 0.83 | 0.77 | 1.86 |
| YBR249C | ARO4  | 6411  | 3619 | 1.77 | 0.83 | 0.77 | 1.86 |
| YNL288W |       | 1339  | 756  | 1.77 | 0.82 | 0.77 | 1.86 |
| YDR353W | TRR1  | 3917  | 2214 | 1.77 | 0.82 | 0.77 | 1.85 |
| YHR160C | PEX18 | 1608  | 909  | 1.77 | 0.82 | 0.77 | 1.85 |
| YJL140W | RPB4  | 914   | 517  | 1.77 | 0.82 | 0.77 | 1.85 |
| YPL244C |       | 1402  | 793  | 1.77 | 0.82 | 0.77 | 1.85 |
| YDR290W |       | 684   | 387  | 1.77 | 0.82 | 0.77 | 1.85 |
| YDR415C |       | 958   | 542  | 1.77 | 0.82 | 0.77 | 1.85 |
| YGR278W |       | 1489  | 844  | 1.76 | 0.82 | 0.76 | 1.84 |
| YBR016W |       | 1606  | 910  | 1.76 | 0.82 | 0.76 | 1.84 |
| YFR039C |       | 1962  | 1114 | 1.76 | 0.82 | 0.76 | 1.84 |
| YPL245W |       | 1629  | 925  | 1.76 | 0.82 | 0.76 | 1.84 |
| YKR070W |       | 822   | 468  | 1.76 | 0.81 | 0.76 | 1.83 |
| YGL192W | IME4  | 1267  | 721  | 1.76 | 0.81 | 0.76 | 1.83 |
| YLR257W |       | 2628  | 1496 | 1.76 | 0.81 | 0.76 | 1.83 |
| YER162C | RAD4  | 2976  | 1696 | 1.75 | 0.81 | 0.76 | 1.82 |
| YOR389W |       | 1590  | 906  | 1.75 | 0.81 | 0.76 | 1.82 |
| YNL073W | MSK1  | 500   | 285  | 1.75 | 0.81 | 0.76 | 1.82 |
| YMR070W | MOT3  | 2806  | 1599 | 1.75 | 0.81 | 0.75 | 1.82 |
| YKR043C |       | 3228  | 1840 | 1.75 | 0.81 | 0.75 | 1.82 |
| YGL044C | RNA15 | 2377  | 1355 | 1.75 | 0.81 | 0.75 | 1.82 |
| YDR036C |       | 1068  | 610  | 1.75 | 0.81 | 0.75 | 1.82 |
| YDR414C | ERD1  | 2061  | 1178 | 1.75 | 0.81 | 0.75 | 1.81 |

|         |        |       |      |      |      |      |      |
|---------|--------|-------|------|------|------|------|------|
| YMR053C | STB2   | 1166  | 668  | 1.75 | 0.80 | 0.75 | 1.81 |
| YPR187W | RPO26  | 935   | 536  | 1.74 | 0.80 | 0.75 | 1.80 |
| YBL006C |        | 4504  | 2583 | 1.74 | 0.80 | 0.75 | 1.80 |
| YPR081C |        | 3360  | 1927 | 1.74 | 0.80 | 0.75 | 1.80 |
| YBR067C | TIP1   | 2033  | 1166 | 1.74 | 0.80 | 0.75 | 1.80 |
| YKR091W | SRL3   | 2372  | 1362 | 1.74 | 0.80 | 0.74 | 1.80 |
| YOL033W | MSE1   | 644   | 370  | 1.74 | 0.80 | 0.74 | 1.80 |
| YDR496C |        | 3019  | 1735 | 1.74 | 0.80 | 0.74 | 1.79 |
| YEL058W | PCM1   | 2613  | 1503 | 1.74 | 0.80 | 0.74 | 1.79 |
| YCRO24C |        | 1058  | 609  | 1.74 | 0.80 | 0.74 | 1.79 |
| YFRO55W |        | 1859  | 1070 | 1.74 | 0.80 | 0.74 | 1.79 |
| YLR253W |        | 1942  | 1119 | 1.74 | 0.80 | 0.74 | 1.79 |
| YNR015W | SMM1   | 1543  | 889  | 1.74 | 0.80 | 0.74 | 1.78 |
| YPL117C | IDI1   | 932   | 538  | 1.73 | 0.79 | 0.74 | 1.78 |
| YMR224C | MRE11  | 2265  | 1308 | 1.73 | 0.79 | 0.74 | 1.78 |
| YKL002W |        | 734   | 424  | 1.73 | 0.79 | 0.74 | 1.78 |
| YPL212C | PUS1   | 1504  | 869  | 1.73 | 0.79 | 0.74 | 1.78 |
| YIL104C |        | 2063  | 1193 | 1.73 | 0.79 | 0.73 | 1.77 |
| YLR440C |        | 989   | 572  | 1.73 | 0.79 | 0.73 | 1.77 |
| YJL139C | YUR1   | 1809  | 1047 | 1.73 | 0.79 | 0.73 | 1.77 |
| YGL156W | AMS1   | 846   | 490  | 1.73 | 0.79 | 0.73 | 1.77 |
| YOL020W | TAT2   | 1442  | 835  | 1.73 | 0.79 | 0.73 | 1.77 |
| YHR217C |        | 5583  | 3236 | 1.73 | 0.79 | 0.73 | 1.76 |
| YDL229W | SSB1   | 650   | 377  | 1.72 | 0.79 | 0.73 | 1.76 |
| YMR023C | MSS1   | 1070  | 621  | 1.72 | 0.79 | 0.73 | 1.76 |
| YOR380W |        | 1067  | 619  | 1.72 | 0.79 | 0.73 | 1.76 |
| YNL290W | RFC3   | 1833  | 1064 | 1.72 | 0.78 | 0.73 | 1.76 |
| YGL174W |        | 981   | 570  | 1.72 | 0.78 | 0.73 | 1.76 |
| YNL004W | HRB1   | 4583  | 2668 | 1.72 | 0.78 | 0.72 | 1.75 |
| YBR158W | ICS4   | 10572 | 6155 | 1.72 | 0.78 | 0.72 | 1.75 |
| YOR267C |        | 2694  | 1569 | 1.72 | 0.78 | 0.72 | 1.75 |
| YOL086C | ADH1   | 5435  | 3166 | 1.72 | 0.78 | 0.72 | 1.75 |
| YFL047W |        | 3039  | 1775 | 1.71 | 0.78 | 0.72 | 1.74 |
| YCR009C | RVS161 | 1191  | 696  | 1.71 | 0.78 | 0.72 | 1.74 |
| YBR003W | COQ1   | 1954  | 1143 | 1.71 | 0.77 | 0.72 | 1.73 |
| YNL134C |        | 2342  | 1370 | 1.71 | 0.77 | 0.72 | 1.73 |

|         |           |      |      |      |      |      |      |
|---------|-----------|------|------|------|------|------|------|
| YNL326C |           | 1288 | 754  | 1.71 | 0.77 | 0.72 | 1.73 |
| YOR187W | TUF1      | 2187 | 1280 | 1.71 | 0.77 | 0.72 | 1.73 |
| YER147C |           | 2069 | 1212 | 1.71 | 0.77 | 0.72 | 1.73 |
| YDL185W | TFP1      | 7648 | 4481 | 1.71 | 0.77 | 0.72 | 1.73 |
| YOR303W | CPA1      | 1188 | 696  | 1.71 | 0.77 | 0.72 | 1.73 |
| YLR247C |           | 3777 | 2214 | 1.71 | 0.77 | 0.71 | 1.73 |
| YOR062C |           | 1802 | 1057 | 1.70 | 0.77 | 0.71 | 1.72 |
| YCL067C | HMLALPHA2 | 874  | 513  | 1.70 | 0.77 | 0.71 | 1.72 |
| YOR237W | HES1      | 1208 | 710  | 1.70 | 0.77 | 0.71 | 1.72 |
| YOR096W | RPS7A     | 1303 | 766  | 1.70 | 0.77 | 0.71 | 1.71 |
| YJR077C | MIR1      | 1833 | 1079 | 1.70 | 0.76 | 0.71 | 1.71 |
| YOR313C | SPS4      | 569  | 335  | 1.70 | 0.76 | 0.71 | 1.71 |
| YPR202W |           | 6369 | 3756 | 1.70 | 0.76 | 0.71 | 1.70 |
| YLR439W | MRPL4     | 1080 | 637  | 1.70 | 0.76 | 0.71 | 1.70 |
| YMR144W |           | 657  | 388  | 1.69 | 0.76 | 0.70 | 1.70 |
| YPR158W |           | 889  | 525  | 1.69 | 0.76 | 0.70 | 1.70 |
| YGL236C | MTO1      | 1322 | 782  | 1.69 | 0.76 | 0.70 | 1.69 |
| YBR156C | SLI15     | 4056 | 2399 | 1.69 | 0.76 | 0.70 | 1.69 |
| YKL153W |           | 7294 | 4322 | 1.69 | 0.76 | 0.70 | 1.69 |
| YHR156C |           | 1162 | 689  | 1.69 | 0.75 | 0.70 | 1.69 |
| YPR138C | MEP3      | 2229 | 1322 | 1.69 | 0.75 | 0.70 | 1.68 |
| YPL011C | TAF47     | 1267 | 752  | 1.68 | 0.75 | 0.70 | 1.68 |
| YOL149W | DCP1      | 454  | 270  | 1.68 | 0.75 | 0.69 | 1.68 |
| YLR461W | PAU4      | 789  | 470  | 1.68 | 0.75 | 0.69 | 1.67 |
| YER092W |           | 438  | 261  | 1.68 | 0.75 | 0.69 | 1.67 |
| YOL040C | RPS15     | 5227 | 3113 | 1.68 | 0.75 | 0.69 | 1.67 |
| YOL030W |           | 6034 | 3594 | 1.68 | 0.75 | 0.69 | 1.67 |
| YKL056C |           | 1931 | 1151 | 1.68 | 0.75 | 0.69 | 1.67 |
| YOR048C | RAT1      | 1210 | 721  | 1.68 | 0.75 | 0.69 | 1.67 |
| YPR149W | NCE102    | 2471 | 1474 | 1.68 | 0.75 | 0.69 | 1.66 |
| YPL037C | EGD1      | 1836 | 1095 | 1.68 | 0.75 | 0.69 | 1.66 |
| YFL041W | FET5      | 3766 | 2247 | 1.68 | 0.74 | 0.69 | 1.66 |
| YKRO40C |           | 1428 | 852  | 1.68 | 0.74 | 0.69 | 1.66 |
| YOR108W |           | 848  | 506  | 1.68 | 0.74 | 0.69 | 1.66 |
| YDR351W | SBE2      | 2142 | 1279 | 1.67 | 0.74 | 0.69 | 1.66 |
| YDL245C | HXT15     | 486  | 290  | 1.67 | 0.74 | 0.69 | 1.66 |



|           |           |      |      |      |      |      |      |
|-----------|-----------|------|------|------|------|------|------|
| YJR058C   | APS2      | 954  | 570  | 1.67 | 0.74 | 0.69 | 1.66 |
| YEL074W   |           | 5613 | 3358 | 1.67 | 0.74 | 0.69 | 1.65 |
| YDR301W   | CFT1      | 677  | 405  | 1.67 | 0.74 | 0.68 | 1.65 |
| YIL107C   | PFK26     | 792  | 474  | 1.67 | 0.74 | 0.68 | 1.65 |
| YDL133W   |           | 754  | 452  | 1.67 | 0.74 | 0.68 | 1.65 |
| YIL155C   | GUT2      | 569  | 341  | 1.67 | 0.74 | 0.68 | 1.65 |
| YKR076W   | ECM4      | 555  | 333  | 1.67 | 0.74 | 0.68 | 1.64 |
| YJL112W   |           | 2207 | 1326 | 1.66 | 0.74 | 0.68 | 1.64 |
| YFRO24C   |           | 1729 | 1039 | 1.66 | 0.73 | 0.68 | 1.64 |
| YNL102W   | POL1      | 668  | 402  | 1.66 | 0.73 | 0.68 | 1.64 |
| YDL107W   | MSS2      | 740  | 445  | 1.66 | 0.73 | 0.68 | 1.64 |
| YPL259C   | APM1      | 1218 | 733  | 1.66 | 0.73 | 0.68 | 1.63 |
| YDL047W   | SIT4      | 2170 | 1306 | 1.66 | 0.73 | 0.68 | 1.63 |
| YDR363W-A | YDR363W-A | 2130 | 1282 | 1.66 | 0.73 | 0.68 | 1.63 |
| YPL277C   |           | 1809 | 1089 | 1.66 | 0.73 | 0.68 | 1.63 |
| YMR235C   | RNA1      | 1141 | 687  | 1.66 | 0.73 | 0.68 | 1.63 |
| YOL064C   | MET22     | 1173 | 707  | 1.66 | 0.73 | 0.67 | 1.63 |
| YBR188C   | NTC20     | 1058 | 638  | 1.66 | 0.73 | 0.67 | 1.63 |
| YGL161C   |           | 2238 | 1349 | 1.66 | 0.73 | 0.67 | 1.63 |
| YKL140W   | TGL1      | 2153 | 1298 | 1.66 | 0.73 | 0.67 | 1.63 |
| YPL023C   | MET12     | 2527 | 1524 | 1.66 | 0.73 | 0.67 | 1.63 |
| YMR282C   | AEP2      | 1940 | 1170 | 1.66 | 0.73 | 0.67 | 1.63 |
| YOR301W   | RAX1      | 1540 | 929  | 1.66 | 0.73 | 0.67 | 1.63 |
| YCR052W   | RSC6      | 7419 | 4480 | 1.66 | 0.73 | 0.67 | 1.62 |
| YPL249C-A | YPL249C-A | 1164 | 703  | 1.66 | 0.73 | 0.67 | 1.62 |
| YPR060C   | ARO7      | 827  | 500  | 1.65 | 0.73 | 0.67 | 1.62 |
| YKL152C   | GPM1      | 1880 | 1137 | 1.65 | 0.73 | 0.67 | 1.62 |
| YPL055C   |           | 1099 | 665  | 1.65 | 0.73 | 0.67 | 1.62 |
| YPL233W   |           | 751  | 455  | 1.65 | 0.72 | 0.67 | 1.61 |
| YMR015C   | ERG5      | 1555 | 943  | 1.65 | 0.72 | 0.67 | 1.61 |
| YGL172W   | NUP49     | 2121 | 1287 | 1.65 | 0.72 | 0.66 | 1.61 |
| YCR039C   | MATALPHA2 | 992  | 602  | 1.65 | 0.72 | 0.66 | 1.60 |
| YOR113W   | AZF1      | 608  | 369  | 1.65 | 0.72 | 0.66 | 1.60 |
| YLR299W   | ECM38     | 1483 | 901  | 1.65 | 0.72 | 0.66 | 1.60 |
| YPL069C   | BTS1      | 966  | 587  | 1.65 | 0.72 | 0.66 | 1.60 |
| YLR293C   | GSP1      | 1768 | 1074 | 1.65 | 0.72 | 0.66 | 1.60 |

|           |        |      |      |      |      |      |      |
|-----------|--------|------|------|------|------|------|------|
| YNL214W   | PEX17  | 953  | 579  | 1.65 | 0.72 | 0.66 | 1.60 |
| YDR363W   | ESC2   | 1334 | 811  | 1.65 | 0.72 | 0.66 | 1.60 |
| YLR077W   |        | 1661 | 1010 | 1.64 | 0.72 | 0.66 | 1.60 |
| YPR181C   | SEC23  | 4320 | 2629 | 1.64 | 0.72 | 0.66 | 1.60 |
| YAL035C-A |        | 1206 | 734  | 1.64 | 0.72 | 0.66 | 1.59 |
| YER126C   |        | 1511 | 920  | 1.64 | 0.72 | 0.66 | 1.59 |
| YER102W   | RPS8B  | 2383 | 1451 | 1.64 | 0.72 | 0.66 | 1.59 |
| YKL168C   | KKQ8   | 576  | 351  | 1.64 | 0.72 | 0.66 | 1.59 |
| YHL034C   | SBP1   | 2763 | 1683 | 1.64 | 0.72 | 0.66 | 1.59 |
| YOR304C-A |        | 466  | 284  | 1.64 | 0.71 | 0.66 | 1.59 |
| YELO26W   | SNU13  | 1773 | 1080 | 1.64 | 0.71 | 0.66 | 1.59 |
| YNL118C   | DCP2   | 2956 | 1802 | 1.64 | 0.71 | 0.66 | 1.59 |
| YOR238W   |        | 1200 | 732  | 1.64 | 0.71 | 0.66 | 1.59 |
| YJR121W   | ATP2   | 1988 | 1213 | 1.64 | 0.71 | 0.66 | 1.59 |
| YCLX05C   |        | 1015 | 620  | 1.64 | 0.71 | 0.65 | 1.58 |
| YDR419W   | RAD30  | 1310 | 801  | 1.64 | 0.71 | 0.65 | 1.58 |
| YOLO21C   | DIS3   | 2693 | 1647 | 1.64 | 0.71 | 0.65 | 1.58 |
| YGL189C   | RPS26A | 2250 | 1376 | 1.63 | 0.71 | 0.65 | 1.58 |
| YOR252W   |        | 1593 | 975  | 1.63 | 0.71 | 0.65 | 1.58 |
| YML123C   | PHO84  | 5386 | 3296 | 1.63 | 0.71 | 0.65 | 1.58 |
| YCR007C   |        | 590  | 361  | 1.63 | 0.71 | 0.65 | 1.57 |
| YGR283C   |        | 1540 | 943  | 1.63 | 0.71 | 0.65 | 1.57 |
| YHR136C   | SPL2   | 3005 | 1844 | 1.63 | 0.70 | 0.65 | 1.57 |
| YKR025W   | RPC37  | 1127 | 692  | 1.63 | 0.70 | 0.65 | 1.56 |
| YDR046C   | BAP3   | 637  | 391  | 1.63 | 0.70 | 0.65 | 1.56 |
| YOR166C   |        | 1067 | 655  | 1.63 | 0.70 | 0.65 | 1.56 |
| YDR298C   | ATP5   | 1260 | 774  | 1.63 | 0.70 | 0.65 | 1.56 |
| YOR348C   | PUT4   | 805  | 495  | 1.63 | 0.70 | 0.65 | 1.56 |
| YOLO50C   |        | 1580 | 972  | 1.63 | 0.70 | 0.64 | 1.56 |
| YPL027W   |        | 645  | 397  | 1.63 | 0.70 | 0.64 | 1.56 |
| YMR204C   |        | 2763 | 1702 | 1.62 | 0.70 | 0.64 | 1.55 |
| YJR001W   |        | 2454 | 1512 | 1.62 | 0.70 | 0.64 | 1.55 |
| YFL055W   | AGP3   | 1369 | 844  | 1.62 | 0.70 | 0.64 | 1.55 |
| YFR037C   | RSC8   | 3309 | 2041 | 1.62 | 0.70 | 0.64 | 1.55 |
| YBR204C   |        | 1144 | 707  | 1.62 | 0.69 | 0.64 | 1.54 |
| YER062C   | HOR2   | 862  | 533  | 1.62 | 0.69 | 0.64 | 1.54 |

|            |            |      |      |      |      |      |      |
|------------|------------|------|------|------|------|------|------|
| YKL023W    |            | 1118 | 691  | 1.62 | 0.69 | 0.64 | 1.54 |
| YKL059C    |            | 1027 | 635  | 1.62 | 0.69 | 0.64 | 1.54 |
| YEL047C    |            | 2569 | 1590 | 1.62 | 0.69 | 0.64 | 1.54 |
| YCRO23C    |            | 1753 | 1085 | 1.62 | 0.69 | 0.64 | 1.54 |
| YDL071C    |            | 1459 | 903  | 1.62 | 0.69 | 0.64 | 1.54 |
| YEL030W    | ECM10      | 754  | 467  | 1.62 | 0.69 | 0.64 | 1.54 |
| YDR032C    |            | 1093 | 677  | 1.62 | 0.69 | 0.64 | 1.53 |
| YGR295C    | COS6       | 4733 | 2932 | 1.61 | 0.69 | 0.63 | 1.53 |
| YKL013C    | ARC19      | 3205 | 1987 | 1.61 | 0.69 | 0.63 | 1.53 |
| YGR108W    | CLB1       | 2935 | 1820 | 1.61 | 0.69 | 0.63 | 1.53 |
| YDR054C    | CDC34      | 1475 | 915  | 1.61 | 0.69 | 0.63 | 1.53 |
| YDL022W    | GPD1       | 1550 | 962  | 1.61 | 0.69 | 0.63 | 1.53 |
| YLL011W    | SOF1       | 2218 | 1378 | 1.61 | 0.69 | 0.63 | 1.52 |
| YKL093W    | MBR1       | 613  | 381  | 1.61 | 0.69 | 0.63 | 1.52 |
| YBR233W    | PBP2       | 6054 | 3765 | 1.61 | 0.69 | 0.63 | 1.52 |
| YNL322C    | KRE1       | 892  | 555  | 1.61 | 0.69 | 0.63 | 1.52 |
| YMR264W    | CUE1       | 746  | 464  | 1.61 | 0.68 | 0.63 | 1.52 |
| YMR087W    |            | 516  | 321  | 1.61 | 0.68 | 0.63 | 1.52 |
| YOR234C    | RPL33B     | 1219 | 759  | 1.61 | 0.68 | 0.63 | 1.52 |
| YHR043C    | DOG2       | 2675 | 1666 | 1.61 | 0.68 | 0.63 | 1.51 |
| YLL044W    |            | 3561 | 2220 | 1.60 | 0.68 | 0.63 | 1.51 |
| YFR041C    |            | 959  | 598  | 1.60 | 0.68 | 0.63 | 1.51 |
| YLR105C    | SEN2       | 1165 | 727  | 1.60 | 0.68 | 0.62 | 1.51 |
| YILWTy3-1A | YILWTy3-1A | 2806 | 1751 | 1.60 | 0.68 | 0.62 | 1.51 |
| YOR016C    | ERP4       | 1102 | 688  | 1.60 | 0.68 | 0.62 | 1.51 |
| YPL177C    | CUP9       | 978  | 611  | 1.60 | 0.68 | 0.62 | 1.50 |
| YDR432W    | NPL3       | 4240 | 2649 | 1.60 | 0.68 | 0.62 | 1.50 |
| YJR072C    |            | 1970 | 1232 | 1.60 | 0.68 | 0.62 | 1.50 |
| YMR114C    |            | 999  | 625  | 1.60 | 0.68 | 0.62 | 1.50 |
| YLR270W    |            | 1254 | 785  | 1.60 | 0.68 | 0.62 | 1.50 |
| YHL048W    | COS8       | 2934 | 1836 | 1.60 | 0.68 | 0.62 | 1.50 |
| YOR283W    |            | 820  | 513  | 1.60 | 0.68 | 0.62 | 1.50 |
| YCR038C    | BUD5       | 647  | 405  | 1.60 | 0.67 | 0.62 | 1.49 |
| YDR189W    | SLY1       | 2555 | 1601 | 1.60 | 0.67 | 0.62 | 1.49 |
| YPL063W    |            | 2304 | 1444 | 1.60 | 0.67 | 0.62 | 1.49 |
| YOR224C    | RPB8       | 967  | 607  | 1.59 | 0.67 | 0.62 | 1.49 |

|           |        |      |      |      |      |      |      |
|-----------|--------|------|------|------|------|------|------|
| YNL046W   |        | 4423 | 2779 | 1.59 | 0.67 | 0.61 | 1.48 |
| YNL049C   | SFB2   | 2251 | 1415 | 1.59 | 0.67 | 0.61 | 1.48 |
| YPR197C   |        | 1162 | 731  | 1.59 | 0.67 | 0.61 | 1.48 |
| YHR118C   | ORC6   | 3427 | 2158 | 1.59 | 0.67 | 0.61 | 1.48 |
| YJL125C   | GCD14  | 1780 | 1121 | 1.59 | 0.67 | 0.61 | 1.48 |
| YBR159W   |        | 2519 | 1587 | 1.59 | 0.67 | 0.61 | 1.47 |
| YJR059W   | PTK2   | 1819 | 1146 | 1.59 | 0.67 | 0.61 | 1.47 |
| YGL240W   | DOC1   | 693  | 437  | 1.58 | 0.66 | 0.61 | 1.47 |
| YNL132W   |        | 1880 | 1188 | 1.58 | 0.66 | 0.61 | 1.46 |
| YEL012W   | UBC8   | 728  | 460  | 1.58 | 0.66 | 0.61 | 1.46 |
| YKR057W   | RPS21A | 1425 | 901  | 1.58 | 0.66 | 0.61 | 1.46 |
| YGR277C   |        | 1533 | 970  | 1.58 | 0.66 | 0.60 | 1.46 |
| YLR033W   |        | 8826 | 5588 | 1.58 | 0.66 | 0.60 | 1.46 |
| YOL019W   |        | 3478 | 2203 | 1.58 | 0.66 | 0.60 | 1.45 |
| YPL031C   | PHO85  | 957  | 606  | 1.58 | 0.66 | 0.60 | 1.45 |
| YPL064C   |        | 834  | 529  | 1.58 | 0.66 | 0.60 | 1.45 |
| YDL026W   |        | 518  | 329  | 1.58 | 0.66 | 0.60 | 1.45 |
| YMR313C   |        | 691  | 439  | 1.57 | 0.66 | 0.60 | 1.45 |
| YLR094C   | GIS3   | 1222 | 776  | 1.57 | 0.65 | 0.60 | 1.45 |
| YMR121C   | RPL15B | 2896 | 1840 | 1.57 | 0.65 | 0.60 | 1.45 |
| YPR142C   |        | 967  | 615  | 1.57 | 0.65 | 0.60 | 1.44 |
| YLR157C-A | TyA    | 1126 | 716  | 1.57 | 0.65 | 0.60 | 1.44 |
| YPR154W   |        | 533  | 339  | 1.57 | 0.65 | 0.60 | 1.44 |
| YML080W   |        | 1435 | 913  | 1.57 | 0.65 | 0.60 | 1.44 |
| YOL042W   |        | 1801 | 1146 | 1.57 | 0.65 | 0.60 | 1.44 |
| YER149C   | PEA2   | 1371 | 873  | 1.57 | 0.65 | 0.59 | 1.44 |
| YPL095C   |        | 614  | 391  | 1.57 | 0.65 | 0.59 | 1.44 |
| YIL170W   | HXT12  | 810  | 516  | 1.57 | 0.65 | 0.59 | 1.44 |
| YPRO22C   |        | 3618 | 2305 | 1.57 | 0.65 | 0.59 | 1.44 |
| YIL110W   |        | 832  | 530  | 1.57 | 0.65 | 0.59 | 1.43 |
| YEL011W   | GLC3   | 1946 | 1241 | 1.57 | 0.65 | 0.59 | 1.43 |
| YAL025C   | MAK16  | 4158 | 2652 | 1.57 | 0.65 | 0.59 | 1.43 |
| YOL147C   | PEX11  | 676  | 431  | 1.57 | 0.65 | 0.59 | 1.43 |
| YFL048C   | EMP47  | 2395 | 1528 | 1.57 | 0.65 | 0.59 | 1.43 |
| YLR263W   | RED1   | 2207 | 1409 | 1.57 | 0.65 | 0.59 | 1.43 |
| YKR101W   | SIR1   | 563  | 360  | 1.56 | 0.65 | 0.59 | 1.42 |

|         |        |      |      |      |      |      |      |
|---------|--------|------|------|------|------|------|------|
| YNL160W | YGP1   | 446  | 285  | 1.56 | 0.64 | 0.59 | 1.42 |
| YER144C | UBP5   | 1498 | 959  | 1.56 | 0.64 | 0.59 | 1.42 |
| YPR148C |        | 2275 | 1458 | 1.56 | 0.64 | 0.59 | 1.41 |
| YBR236C | ABD1   | 1579 | 1012 | 1.56 | 0.64 | 0.59 | 1.41 |
| YIL118W | RHO3   | 4912 | 3149 | 1.56 | 0.64 | 0.59 | 1.41 |
| YGR091W | PRP31  | 877  | 562  | 1.56 | 0.64 | 0.59 | 1.41 |
| YDR205W |        | 651  | 418  | 1.56 | 0.64 | 0.58 | 1.41 |
| YJL190C | RPS22A | 1734 | 1113 | 1.56 | 0.64 | 0.58 | 1.41 |
| YGR087C | PDC6   | 1145 | 736  | 1.56 | 0.64 | 0.58 | 1.41 |
| YNL082W | PMS1   | 1446 | 929  | 1.56 | 0.64 | 0.58 | 1.41 |
| YER113C |        | 3594 | 2310 | 1.56 | 0.64 | 0.58 | 1.40 |
| YLR367W | RPS22B | 1296 | 833  | 1.56 | 0.64 | 0.58 | 1.40 |
| YOL079W |        | 1395 | 897  | 1.56 | 0.64 | 0.58 | 1.40 |
| YPR086W | SUA7   | 2039 | 1312 | 1.55 | 0.64 | 0.58 | 1.40 |
| YDR412W |        | 2163 | 1392 | 1.55 | 0.64 | 0.58 | 1.40 |
| YGL184C |        | 719  | 463  | 1.55 | 0.64 | 0.58 | 1.40 |
| YKRO86W | PRP16  | 604  | 389  | 1.55 | 0.64 | 0.58 | 1.40 |
| YOR268C |        | 407  | 262  | 1.55 | 0.63 | 0.58 | 1.40 |
| YHR010W | RPL27A | 1595 | 1027 | 1.55 | 0.63 | 0.58 | 1.40 |
| YGL224C |        | 1276 | 822  | 1.55 | 0.63 | 0.58 | 1.40 |
| YLR426W |        | 1790 | 1153 | 1.55 | 0.63 | 0.58 | 1.40 |
| YJR032W | CPR7   | 1327 | 855  | 1.55 | 0.63 | 0.58 | 1.40 |
| YGL175C | SAE2   | 1498 | 965  | 1.55 | 0.63 | 0.58 | 1.40 |
| YLR359W | ADE13  | 1517 | 978  | 1.55 | 0.63 | 0.58 | 1.39 |
| YGL176C |        | 564  | 364  | 1.55 | 0.63 | 0.58 | 1.39 |
| YJR094C | IME1   | 2669 | 1722 | 1.55 | 0.63 | 0.58 | 1.39 |
| YPR180W | AOS1   | 970  | 626  | 1.55 | 0.63 | 0.58 | 1.39 |
| YGL209W | MIG2   | 2060 | 1330 | 1.55 | 0.63 | 0.57 | 1.39 |
| YOR176W | HEM15  | 1385 | 895  | 1.55 | 0.63 | 0.57 | 1.39 |
| YPL049C | DIG1   | 2980 | 1929 | 1.54 | 0.63 | 0.57 | 1.38 |
| YKRO42W | UTH1   | 1976 | 1280 | 1.54 | 0.63 | 0.57 | 1.38 |
| YNL133C |        | 2780 | 1801 | 1.54 | 0.63 | 0.57 | 1.38 |
| YPL193W | RSA1   | 804  | 521  | 1.54 | 0.63 | 0.57 | 1.38 |
| YNL113W | RPC19  | 1130 | 733  | 1.54 | 0.62 | 0.57 | 1.37 |
| YPL048W | CAM1   | 1658 | 1076 | 1.54 | 0.62 | 0.57 | 1.37 |
| YPL274W | SAM3   | 3078 | 1998 | 1.54 | 0.62 | 0.57 | 1.37 |

|         |        |      |      |      |      |      |      |
|---------|--------|------|------|------|------|------|------|
| YOL022C |        | 1848 | 1200 | 1.54 | 0.62 | 0.57 | 1.37 |
| YOR192C |        | 1050 | 682  | 1.54 | 0.62 | 0.57 | 1.37 |
| YNR035C | ARC35  | 2196 | 1427 | 1.54 | 0.62 | 0.57 | 1.37 |
| YJL178C |        | 1385 | 900  | 1.54 | 0.62 | 0.57 | 1.37 |
| YAL048C |        | 8851 | 5754 | 1.54 | 0.62 | 0.57 | 1.36 |
| YMR038C | LYS7   | 2349 | 1528 | 1.54 | 0.62 | 0.56 | 1.36 |
| YOR383C |        | 2008 | 1306 | 1.54 | 0.62 | 0.56 | 1.36 |
| YIL088C |        | 1412 | 919  | 1.54 | 0.62 | 0.56 | 1.36 |
| YHL013C |        | 1018 | 663  | 1.54 | 0.62 | 0.56 | 1.36 |
| YBR290W | BSD2   | 1053 | 686  | 1.54 | 0.62 | 0.56 | 1.36 |
| YLR061W | RPL22A | 1916 | 1248 | 1.53 | 0.62 | 0.56 | 1.36 |
| YBR005W |        | 832  | 542  | 1.53 | 0.62 | 0.56 | 1.36 |
| YBR109C | CMD1   | 1184 | 772  | 1.53 | 0.62 | 0.56 | 1.36 |
| YHL015W | RPS20  | 2930 | 1911 | 1.53 | 0.62 | 0.56 | 1.35 |
| YDR416W | SYF1   | 929  | 606  | 1.53 | 0.62 | 0.56 | 1.35 |
| YGR169C |        | 2211 | 1443 | 1.53 | 0.62 | 0.56 | 1.35 |
| YNL001W | DOM34  | 4734 | 3091 | 1.53 | 0.62 | 0.56 | 1.35 |
| YOR288C | MPD1   | 1893 | 1236 | 1.53 | 0.61 | 0.56 | 1.35 |
| YGL226W |        | 865  | 565  | 1.53 | 0.61 | 0.56 | 1.35 |
| YMR297W | PRC1   | 2414 | 1578 | 1.53 | 0.61 | 0.56 | 1.35 |
| YDL086W |        | 1471 | 962  | 1.53 | 0.61 | 0.56 | 1.34 |
| YDR108W | GSG1   | 483  | 316  | 1.53 | 0.61 | 0.56 | 1.34 |
| YDL233W |        | 1131 | 740  | 1.53 | 0.61 | 0.56 | 1.34 |
| YOL098C |        | 6513 | 4264 | 1.53 | 0.61 | 0.56 | 1.34 |
| YKR088C |        | 964  | 631  | 1.53 | 0.61 | 0.56 | 1.34 |
| YOR314W |        | 655  | 429  | 1.53 | 0.61 | 0.55 | 1.34 |
| YGL237C | HAP2   | 450  | 295  | 1.53 | 0.61 | 0.55 | 1.34 |
| YDR339C |        | 597  | 391  | 1.53 | 0.61 | 0.55 | 1.34 |
| YGL030W | RPL30  | 797  | 522  | 1.53 | 0.61 | 0.55 | 1.34 |
| YHR093W | AHT1   | 1521 | 997  | 1.53 | 0.61 | 0.55 | 1.34 |
| YNL047C |        | 840  | 551  | 1.53 | 0.61 | 0.55 | 1.33 |
| YDL054C |        | 2264 | 1485 | 1.52 | 0.61 | 0.55 | 1.33 |
| YIL103W |        | 700  | 459  | 1.52 | 0.61 | 0.55 | 1.33 |
| YJL109C |        | 2508 | 1645 | 1.52 | 0.61 | 0.55 | 1.33 |
| YER118C | SSU81  | 3441 | 2258 | 1.52 | 0.61 | 0.55 | 1.33 |
| YAR002W |        | 2571 | 1687 | 1.52 | 0.61 | 0.55 | 1.33 |

|           |           |       |      |      |      |      |      |
|-----------|-----------|-------|------|------|------|------|------|
| YER099C   | PRS2      | 1876  | 1231 | 1.52 | 0.61 | 0.55 | 1.33 |
| YDR002W   | YRB1      | 844   | 554  | 1.52 | 0.61 | 0.55 | 1.33 |
| YPL129W   | ANC1      | 827   | 543  | 1.52 | 0.61 | 0.55 | 1.33 |
| YFRO38W   |           | 2240  | 1471 | 1.52 | 0.61 | 0.55 | 1.33 |
| YDL059C   | RAD59     | 769   | 505  | 1.52 | 0.61 | 0.55 | 1.33 |
| YMR243C   | ZRC1      | 3415  | 2244 | 1.52 | 0.61 | 0.55 | 1.33 |
| YPR002W   | PDH1      | 972   | 639  | 1.52 | 0.61 | 0.55 | 1.33 |
| YLL061W   | MMP1      | 1678  | 1103 | 1.52 | 0.61 | 0.55 | 1.33 |
| YLR407W   |           | 812   | 534  | 1.52 | 0.61 | 0.55 | 1.33 |
| YBR034C   | HMT1      | 2933  | 1929 | 1.52 | 0.60 | 0.55 | 1.32 |
| YAL051W   | YAF1      | 1899  | 1249 | 1.52 | 0.60 | 0.55 | 1.32 |
| YCL068C   |           | 926   | 610  | 1.52 | 0.60 | 0.55 | 1.32 |
| YJL093C   | TOK1      | 1949  | 1284 | 1.52 | 0.60 | 0.55 | 1.32 |
| YCL025C   | AGP1      | 2799  | 1845 | 1.52 | 0.60 | 0.55 | 1.32 |
| YCR073W-A | YCR073W-A | 869   | 573  | 1.52 | 0.60 | 0.55 | 1.32 |
| YBR123C   | TFC1      | 1044  | 688  | 1.52 | 0.60 | 0.55 | 1.32 |
| YNL050C   |           | 5543  | 3654 | 1.52 | 0.60 | 0.55 | 1.32 |
| YLR393W   | ATP10     | 426   | 281  | 1.52 | 0.60 | 0.54 | 1.32 |
| YER134C   |           | 775   | 511  | 1.52 | 0.60 | 0.54 | 1.32 |
| YCLX07W   |           | 2146  | 1415 | 1.52 | 0.60 | 0.54 | 1.31 |
| YAL008W   | FUN14     | 1160  | 765  | 1.52 | 0.60 | 0.54 | 1.31 |
| YOR080W   |           | 777   | 513  | 1.52 | 0.60 | 0.54 | 1.31 |
| YDL199C   |           | 3060  | 2020 | 1.51 | 0.60 | 0.54 | 1.31 |
| YPL246C   |           | 671   | 443  | 1.51 | 0.60 | 0.54 | 1.31 |
| YLR325C   | RPL38     | 1975  | 1306 | 1.51 | 0.60 | 0.54 | 1.31 |
| YOL051W   | GAL11     | 5465  | 3615 | 1.51 | 0.60 | 0.54 | 1.30 |
| YLR073C   |           | 611   | 405  | 1.51 | 0.59 | 0.54 | 1.30 |
| YOR156C   | NFI1      | 1966  | 1303 | 1.51 | 0.59 | 0.54 | 1.30 |
| YNL051W   |           | 1552  | 1029 | 1.51 | 0.59 | 0.54 | 1.30 |
| YIL105C   |           | 2767  | 1835 | 1.51 | 0.59 | 0.54 | 1.30 |
| YEL015W   |           | 2251  | 1493 | 1.51 | 0.59 | 0.54 | 1.29 |
| YAL038W   | CDC19     | 10678 | 7083 | 1.51 | 0.59 | 0.54 | 1.29 |
| YCR040W   | MATALPHA1 | 806   | 535  | 1.51 | 0.59 | 0.54 | 1.29 |
| YJL210W   | PEX2      | 702   | 466  | 1.51 | 0.59 | 0.54 | 1.29 |
| YPL079W   | RPL21B    | 1405  | 933  | 1.51 | 0.59 | 0.53 | 1.29 |
| YNL115C   |           | 2735  | 1818 | 1.50 | 0.59 | 0.53 | 1.29 |

|         |       |      |      |      |      |      |      |
|---------|-------|------|------|------|------|------|------|
| YEL045C |       | 943  | 627  | 1.50 | 0.59 | 0.53 | 1.29 |
| YDR347W | MRP1  | 573  | 381  | 1.50 | 0.59 | 0.53 | 1.28 |
| YHR030C | SLT2  | 1227 | 816  | 1.50 | 0.59 | 0.53 | 1.28 |
| YPL015C | HST2  | 592  | 394  | 1.50 | 0.59 | 0.53 | 1.28 |
| YDL041W |       | 4757 | 3167 | 1.50 | 0.59 | 0.53 | 1.28 |
| YDR006C | SOK1  | 475  | 316  | 1.50 | 0.59 | 0.53 | 1.28 |
| YAL069W |       | 3754 | 2499 | 1.50 | 0.59 | 0.53 | 1.28 |
| YPR019W | CDC54 | 3699 | 2463 | 1.50 | 0.59 | 0.53 | 1.28 |
| YIL123W | SIM1  | 2194 | 1462 | 1.50 | 0.59 | 0.53 | 1.28 |
| YOL066C | RIB2  | 3359 | 2239 | 1.50 | 0.59 | 0.53 | 1.28 |
| YGR167W | CLC1  | 2256 | 1504 | 1.50 | 0.58 | 0.53 | 1.28 |
| YPL003W | ULA1  | 459  | 306  | 1.50 | 0.58 | 0.53 | 1.28 |
| YLR285W |       | 1276 | 851  | 1.50 | 0.58 | 0.53 | 1.28 |
| YDL119C |       | 2715 | 1811 | 1.50 | 0.58 | 0.53 | 1.27 |
| YOR128C | ADE2  | 800  | 534  | 1.50 | 0.58 | 0.53 | 1.27 |
| YDR064W | RPS13 | 1383 | 923  | 1.50 | 0.58 | 0.53 | 1.27 |
| YDR163W |       | 644  | 430  | 1.50 | 0.58 | 0.53 | 1.27 |
| YOL018C | TLG2  | 1258 | 840  | 1.50 | 0.58 | 0.53 | 1.27 |
| YDR540C |       | 614  | 410  | 1.50 | 0.58 | 0.53 | 1.27 |
| YJL101C | GSH1  | 2674 | 1786 | 1.50 | 0.58 | 0.53 | 1.27 |
| YNL017C |       | 900  | 601  | 1.50 | 0.58 | 0.53 | 1.27 |
| YPL081W | RPS9A | 2034 | 1359 | 1.50 | 0.58 | 0.53 | 1.27 |
| YOR075W | UFE1  | 1269 | 848  | 1.50 | 0.58 | 0.53 | 1.27 |
| YHR041C | SRB2  | 3611 | 2414 | 1.50 | 0.58 | 0.52 | 1.27 |
| YIL157C |       | 720  | 482  | 1.49 | 0.58 | 0.52 | 1.26 |
| YNL027W | CRZ1  | 1269 | 850  | 1.49 | 0.58 | 0.52 | 1.26 |
| YHR192W |       | 481  | 322  | 1.49 | 0.58 | 0.52 | 1.26 |
| YER148W | SPT15 | 861  | 577  | 1.49 | 0.58 | 0.52 | 1.26 |
| YKL218C | SRY1  | 412  | 276  | 1.49 | 0.58 | 0.52 | 1.26 |
| YOL095C | HMI1  | 1700 | 1140 | 1.49 | 0.58 | 0.52 | 1.26 |
| YDR188W | CCT6  | 2240 | 1503 | 1.49 | 0.58 | 0.52 | 1.25 |
| YNL061W | NOP2  | 3672 | 2465 | 1.49 | 0.58 | 0.52 | 1.25 |
| YEL072W |       | 1578 | 1059 | 1.49 | 0.58 | 0.52 | 1.25 |
| YMR267W | PPA2  | 1326 | 890  | 1.49 | 0.58 | 0.52 | 1.25 |
| YAL039C | CYC3  | 1354 | 909  | 1.49 | 0.57 | 0.52 | 1.25 |
| YKL001C | MET14 | 1012 | 680  | 1.49 | 0.57 | 0.52 | 1.25 |



|           |        |      |      |      |      |      |      |
|-----------|--------|------|------|------|------|------|------|
| YKL186C   | MTR2   | 604  | 406  | 1.49 | 0.57 | 0.52 | 1.25 |
| YER163C   |        | 949  | 638  | 1.49 | 0.57 | 0.52 | 1.25 |
| YJL166W   | QCR8   | 1173 | 789  | 1.49 | 0.57 | 0.52 | 1.25 |
| YHR109W   |        | 4738 | 3187 | 1.49 | 0.57 | 0.52 | 1.25 |
| YOR144C   | EFD1   | 1483 | 998  | 1.49 | 0.57 | 0.52 | 1.25 |
| YMR301C   | ATM1   | 2971 | 2001 | 1.48 | 0.57 | 0.51 | 1.24 |
| YPR023C   |        | 1701 | 1146 | 1.48 | 0.57 | 0.51 | 1.24 |
| YCRO41W   |        | 1340 | 903  | 1.48 | 0.57 | 0.51 | 1.24 |
| YOR066W   |        | 657  | 443  | 1.48 | 0.57 | 0.51 | 1.24 |
| YCRO24C-A | PMP1   | 2862 | 1929 | 1.48 | 0.57 | 0.51 | 1.24 |
| YNL079C   | TPM1   | 2525 | 1702 | 1.48 | 0.57 | 0.51 | 1.24 |
| YOR331C   |        | 992  | 669  | 1.48 | 0.57 | 0.51 | 1.24 |
| YOR239W   |        | 2520 | 1700 | 1.48 | 0.57 | 0.51 | 1.24 |
| YAL020C   | ATS1   | 1257 | 848  | 1.48 | 0.57 | 0.51 | 1.24 |
| YOR361C   | PRT1   | 5083 | 3430 | 1.48 | 0.57 | 0.51 | 1.23 |
| YIL141W   |        | 1285 | 867  | 1.48 | 0.57 | 0.51 | 1.23 |
| YBRO33W   |        | 1471 | 993  | 1.48 | 0.57 | 0.51 | 1.23 |
| YPL281C   | ERR2   | 2249 | 1518 | 1.48 | 0.57 | 0.51 | 1.23 |
| YPL065W   | VPS28  | 505  | 341  | 1.48 | 0.57 | 0.51 | 1.23 |
| YNL248C   | RPA49  | 1563 | 1056 | 1.48 | 0.57 | 0.51 | 1.23 |
| YMR037C   | MSN2   | 2136 | 1443 | 1.48 | 0.57 | 0.51 | 1.23 |
| YJR154W   |        | 952  | 643  | 1.48 | 0.57 | 0.51 | 1.23 |
| YGR086C   |        | 3238 | 2188 | 1.48 | 0.57 | 0.51 | 1.23 |
| YPR003C   |        | 1487 | 1005 | 1.48 | 0.57 | 0.51 | 1.23 |
| YPL270W   | MDL2   | 2441 | 1650 | 1.48 | 0.57 | 0.51 | 1.23 |
| YLR074C   |        | 881  | 596  | 1.48 | 0.56 | 0.51 | 1.23 |
| YDR255C   |        | 1281 | 867  | 1.48 | 0.56 | 0.51 | 1.22 |
| YPR132W   | RPS23B | 3343 | 2263 | 1.48 | 0.56 | 0.51 | 1.22 |
| YPL228W   | CET1   | 1142 | 773  | 1.48 | 0.56 | 0.51 | 1.22 |
| YDR174W   | HMO1   | 2077 | 1406 | 1.48 | 0.56 | 0.51 | 1.22 |
| YIR008C   | PRI1   | 1237 | 838  | 1.48 | 0.56 | 0.51 | 1.22 |
| YIL119C   | RPI1   | 384  | 260  | 1.48 | 0.56 | 0.51 | 1.22 |
| YGL221C   | NIF3   | 620  | 420  | 1.48 | 0.56 | 0.51 | 1.22 |
| YOR256C   |        | 2502 | 1695 | 1.48 | 0.56 | 0.51 | 1.22 |
| YJR031C   | GEA1   | 1303 | 883  | 1.48 | 0.56 | 0.51 | 1.22 |
| YPR157W   |        | 689  | 467  | 1.48 | 0.56 | 0.50 | 1.22 |

|         |       |      |      |      |      |      |      |
|---------|-------|------|------|------|------|------|------|
| YPL235W | RVB2  | 3979 | 2697 | 1.48 | 0.56 | 0.50 | 1.22 |
| YOR385W |       | 1041 | 706  | 1.47 | 0.56 | 0.50 | 1.22 |
| YGL210W | YPT32 | 1030 | 699  | 1.47 | 0.56 | 0.50 | 1.22 |
| YPL066W |       | 4332 | 2940 | 1.47 | 0.56 | 0.50 | 1.22 |
| YOR371C |       | 871  | 591  | 1.47 | 0.56 | 0.50 | 1.21 |
| YNL337W |       | 2850 | 1935 | 1.47 | 0.56 | 0.50 | 1.21 |
| YCRO68W |       | 7096 | 4817 | 1.47 | 0.56 | 0.50 | 1.21 |
| YPR063C |       | 2078 | 1411 | 1.47 | 0.56 | 0.50 | 1.21 |
| YMR280C | CAT8  | 1418 | 963  | 1.47 | 0.56 | 0.50 | 1.21 |
| YGL012W | ERG4  | 4714 | 3207 | 1.47 | 0.56 | 0.50 | 1.21 |
| YDR394W | RPT3  | 3429 | 2334 | 1.47 | 0.56 | 0.50 | 1.20 |
| YHR125W |       | 2795 | 1903 | 1.47 | 0.55 | 0.50 | 1.20 |
| YGL219C |       | 3306 | 2251 | 1.47 | 0.55 | 0.50 | 1.20 |
| YDR373W | FRQ1  | 1126 | 767  | 1.47 | 0.55 | 0.50 | 1.20 |
| YNL278W |       | 2192 | 1493 | 1.47 | 0.55 | 0.50 | 1.20 |
| YPR122W | AXL1  | 2683 | 1828 | 1.47 | 0.55 | 0.50 | 1.20 |
| YJR085C |       | 851  | 580  | 1.47 | 0.55 | 0.50 | 1.20 |
| YER139C |       | 1020 | 695  | 1.47 | 0.55 | 0.50 | 1.20 |
| YJL012C |       | 5064 | 3452 | 1.47 | 0.55 | 0.50 | 1.20 |
| YOL016C | CMK2  | 978  | 667  | 1.47 | 0.55 | 0.50 | 1.20 |
| YNR047W |       | 2304 | 1571 | 1.47 | 0.55 | 0.50 | 1.20 |
| YPL017C |       | 911  | 621  | 1.47 | 0.55 | 0.50 | 1.20 |
| YLR280C |       | 800  | 546  | 1.47 | 0.55 | 0.50 | 1.20 |
| YHR135C | YCK1  | 1135 | 774  | 1.47 | 0.55 | 0.50 | 1.20 |
| YLL012W |       | 2111 | 1440 | 1.47 | 0.55 | 0.50 | 1.20 |
| YPL078C | ATP4  | 2264 | 1545 | 1.47 | 0.55 | 0.50 | 1.20 |
| YMR308C | PSE1  | 8453 | 5769 | 1.47 | 0.55 | 0.50 | 1.20 |
| YDR063W |       | 1669 | 1139 | 1.46 | 0.55 | 0.49 | 1.19 |
| YNL080C |       | 664  | 453  | 1.46 | 0.55 | 0.49 | 1.19 |
| YOL045W |       | 2787 | 1903 | 1.46 | 0.55 | 0.49 | 1.19 |
| YGR138C |       | 1436 | 981  | 1.46 | 0.55 | 0.49 | 1.19 |
| YBL082C | RHK1  | 1319 | 901  | 1.46 | 0.55 | 0.49 | 1.19 |
| YNL114C |       | 562  | 384  | 1.46 | 0.55 | 0.49 | 1.19 |
| YKL103C | LAP4  | 1561 | 1067 | 1.46 | 0.55 | 0.49 | 1.19 |
| YHR058C | MED6  | 1256 | 859  | 1.46 | 0.55 | 0.49 | 1.19 |
| YBR217W | APG12 | 3074 | 2105 | 1.46 | 0.55 | 0.49 | 1.18 |

|           |       |      |      |      |      |      |      |
|-----------|-------|------|------|------|------|------|------|
| YBL068W   | PRS4  | 2281 | 1562 | 1.46 | 0.55 | 0.49 | 1.18 |
| YGR102C   |       | 581  | 398  | 1.46 | 0.55 | 0.49 | 1.18 |
| YBR157C   | ICS2  | 851  | 583  | 1.46 | 0.55 | 0.49 | 1.18 |
| YPL101W   |       | 1086 | 744  | 1.46 | 0.55 | 0.49 | 1.18 |
| YCR092C   | MSH3  | 1555 | 1065 | 1.46 | 0.55 | 0.49 | 1.18 |
| YGR235C   |       | 1406 | 963  | 1.46 | 0.55 | 0.49 | 1.18 |
| YKL104C   | GFA1  | 938  | 643  | 1.46 | 0.55 | 0.49 | 1.18 |
| YNL067W   | RPL9B | 1977 | 1356 | 1.46 | 0.54 | 0.49 | 1.18 |
| YFL037W   | TUB2  | 4733 | 3246 | 1.46 | 0.54 | 0.49 | 1.18 |
| YEL076C-A |       | 3719 | 2551 | 1.46 | 0.54 | 0.49 | 1.18 |
| YMR084W   |       | 544  | 373  | 1.46 | 0.54 | 0.49 | 1.18 |
| YHR009C   |       | 3209 | 2203 | 1.46 | 0.54 | 0.49 | 1.17 |
| YLR040C   |       | 2480 | 1703 | 1.46 | 0.54 | 0.49 | 1.17 |
| YLR177W   |       | 821  | 564  | 1.46 | 0.54 | 0.49 | 1.17 |
| YDR130C   |       | 1457 | 1001 | 1.46 | 0.54 | 0.49 | 1.17 |
| YMR256C   | COX7  | 1219 | 838  | 1.46 | 0.54 | 0.48 | 1.17 |
| YMR206W   |       | 2302 | 1582 | 1.46 | 0.54 | 0.48 | 1.17 |
| YKR047W   |       | 989  | 680  | 1.45 | 0.54 | 0.48 | 1.17 |
| YOR249C   | APC5  | 1394 | 958  | 1.45 | 0.54 | 0.48 | 1.17 |
| YHR001W   |       | 1373 | 944  | 1.45 | 0.54 | 0.48 | 1.17 |
| YJR124C   |       | 1418 | 975  | 1.45 | 0.54 | 0.48 | 1.17 |
| YPL276W   |       | 398  | 274  | 1.45 | 0.54 | 0.48 | 1.17 |
| YPL239W   | YAR1  | 1326 | 912  | 1.45 | 0.54 | 0.48 | 1.17 |
| YPL053C   | KTR6  | 1442 | 992  | 1.45 | 0.54 | 0.48 | 1.17 |
| YOL099C   |       | 994  | 684  | 1.45 | 0.54 | 0.48 | 1.17 |
| YLR443W   | ECM7  | 1016 | 699  | 1.45 | 0.54 | 0.48 | 1.17 |
| YPL249C   |       | 1838 | 1265 | 1.45 | 0.54 | 0.48 | 1.17 |
| YHL035C   |       | 1623 | 1117 | 1.45 | 0.54 | 0.48 | 1.17 |
| YHR164C   | DNA2  | 3373 | 2324 | 1.45 | 0.54 | 0.48 | 1.16 |
| YCR013C   |       | 4041 | 2784 | 1.45 | 0.54 | 0.48 | 1.16 |
| YLR046C   |       | 2061 | 1420 | 1.45 | 0.54 | 0.48 | 1.16 |
| YGL218W   |       | 2792 | 1924 | 1.45 | 0.54 | 0.48 | 1.16 |
| YBR129C   | OPY1  | 760  | 524  | 1.45 | 0.54 | 0.48 | 1.16 |
| YOR065W   | CYT1  | 1494 | 1030 | 1.45 | 0.54 | 0.48 | 1.16 |
| YHR085W   |       | 6307 | 4348 | 1.45 | 0.54 | 0.48 | 1.16 |
| YDR398W   |       | 7058 | 4867 | 1.45 | 0.54 | 0.48 | 1.16 |

|         |        |       |      |      |      |      |      |
|---------|--------|-------|------|------|------|------|------|
| YPR076W |        | 1417  | 977  | 1.45 | 0.54 | 0.48 | 1.16 |
| YOR049C |        | 1038  | 716  | 1.45 | 0.54 | 0.48 | 1.16 |
| YKL041W | VPS24  | 1694  | 1169 | 1.45 | 0.54 | 0.48 | 1.16 |
| YDR397C | NCB2   | 523   | 361  | 1.45 | 0.54 | 0.48 | 1.16 |
| YDR168W | CDC37  | 6273  | 4330 | 1.45 | 0.53 | 0.48 | 1.16 |
| YLR314C | CDC3   | 3389  | 2340 | 1.45 | 0.53 | 0.48 | 1.16 |
| YHR163W | SOL3   | 3671  | 2535 | 1.45 | 0.53 | 0.48 | 1.15 |
| YLR147C | SMD3   | 2720  | 1878 | 1.45 | 0.53 | 0.48 | 1.15 |
| YBR011C | IPP1   | 6407  | 4428 | 1.45 | 0.53 | 0.48 | 1.15 |
| YHR089C | GAR1   | 4968  | 3434 | 1.45 | 0.53 | 0.48 | 1.15 |
| YMR298W |        | 3430  | 2372 | 1.45 | 0.53 | 0.48 | 1.15 |
| YMR146C | TIF34  | 4763  | 3295 | 1.45 | 0.53 | 0.48 | 1.15 |
| YER087W |        | 611   | 423  | 1.45 | 0.53 | 0.48 | 1.15 |
| YDL075W | RPL31A | 1158  | 801  | 1.45 | 0.53 | 0.48 | 1.15 |
| YLR343W |        | 530   | 367  | 1.45 | 0.53 | 0.48 | 1.15 |
| YGR117C |        | 1016  | 703  | 1.45 | 0.53 | 0.48 | 1.15 |
| YPL258C | THI21  | 1024  | 709  | 1.44 | 0.53 | 0.47 | 1.15 |
| YNL106C | INP52  | 1796  | 1243 | 1.44 | 0.53 | 0.47 | 1.15 |
| YDR385W | EFT2   | 10038 | 6949 | 1.44 | 0.53 | 0.47 | 1.15 |
| YOR060C |        | 1722  | 1193 | 1.44 | 0.53 | 0.47 | 1.14 |
| YNR012W | URK1   | 2302  | 1595 | 1.44 | 0.53 | 0.47 | 1.14 |
| YLR121C | YPS3   | 747   | 518  | 1.44 | 0.53 | 0.47 | 1.14 |
| YMR226C |        | 4922  | 3413 | 1.44 | 0.53 | 0.47 | 1.14 |
| YLR042C |        | 627   | 435  | 1.44 | 0.53 | 0.47 | 1.14 |
| YLR289W | GUF1   | 1625  | 1127 | 1.44 | 0.53 | 0.47 | 1.14 |
| YLR286C | CTS1   | 6038  | 4190 | 1.44 | 0.53 | 0.47 | 1.14 |
| YNL070W | TOM7   | 1882  | 1306 | 1.44 | 0.53 | 0.47 | 1.14 |
| YBR141C |        | 539   | 374  | 1.44 | 0.53 | 0.47 | 1.14 |
| YIL139C | REV7   | 471   | 327  | 1.44 | 0.53 | 0.47 | 1.14 |
| YJL124C | LSM1   | 1246  | 865  | 1.44 | 0.53 | 0.47 | 1.14 |
| YNL256W | FOL1   | 2866  | 1991 | 1.44 | 0.53 | 0.47 | 1.13 |
| YOR138C |        | 1039  | 722  | 1.44 | 0.52 | 0.47 | 1.13 |
| YER114C | BOI2   | 2224  | 1547 | 1.44 | 0.52 | 0.47 | 1.13 |
| YGR159C | NSR1   | 4854  | 3377 | 1.44 | 0.52 | 0.47 | 1.13 |
| YHR121W |        | 1000  | 696  | 1.44 | 0.52 | 0.47 | 1.13 |
| YPL128C | TBF1   | 1317  | 917  | 1.44 | 0.52 | 0.47 | 1.13 |

|           |       |      |      |      |      |      |      |
|-----------|-------|------|------|------|------|------|------|
| YPR152C   |       | 1298 | 904  | 1.44 | 0.52 | 0.47 | 1.12 |
| YIL050W   | PCL7  | 3045 | 2121 | 1.44 | 0.52 | 0.47 | 1.12 |
| YLR300W   | EXG1  | 2980 | 2076 | 1.44 | 0.52 | 0.47 | 1.12 |
| YGR106C   |       | 1534 | 1069 | 1.44 | 0.52 | 0.47 | 1.12 |
| YAL030W   | SNC1  | 5887 | 4103 | 1.43 | 0.52 | 0.46 | 1.12 |
| YJL156C   | SSY5  | 691  | 482  | 1.43 | 0.52 | 0.46 | 1.12 |
| YNR003C   | RPC34 | 668  | 466  | 1.43 | 0.52 | 0.46 | 1.12 |
| YBL050W   | SEC17 | 840  | 586  | 1.43 | 0.52 | 0.46 | 1.12 |
| YEL076W-C |       | 4271 | 2979 | 1.43 | 0.52 | 0.46 | 1.12 |
| YOR308C   | SNU66 | 2888 | 2015 | 1.43 | 0.52 | 0.46 | 1.12 |
| YMR239C   | RNT1  | 367  | 256  | 1.43 | 0.52 | 0.46 | 1.12 |
| YEL027W   | CUP5  | 2933 | 2047 | 1.43 | 0.52 | 0.46 | 1.12 |
| YFL021W   | GAT1  | 2952 | 2061 | 1.43 | 0.52 | 0.46 | 1.12 |
| YDL215C   | GDH2  | 2037 | 1423 | 1.43 | 0.52 | 0.46 | 1.11 |
| YER040W   | GLN3  | 2148 | 1501 | 1.43 | 0.52 | 0.46 | 1.11 |
| YER030W   |       | 1182 | 826  | 1.43 | 0.52 | 0.46 | 1.11 |
| YLR161W   |       | 3565 | 2493 | 1.43 | 0.52 | 0.46 | 1.11 |
| YNL188W   | KAR1  | 2776 | 1942 | 1.43 | 0.52 | 0.46 | 1.11 |
| YOR335C   | ALA1  | 7057 | 4937 | 1.43 | 0.52 | 0.46 | 1.11 |
| YBR009C   | HHF1  | 863  | 604  | 1.43 | 0.52 | 0.46 | 1.11 |
| YFRO29W   | PTR3  | 2095 | 1466 | 1.43 | 0.51 | 0.46 | 1.11 |
| YLR193C   |       | 484  | 339  | 1.43 | 0.51 | 0.46 | 1.11 |
| YBR079C   | RPG1  | 7396 | 5179 | 1.43 | 0.51 | 0.46 | 1.11 |
| YBR078W   | ECM33 | 3416 | 2392 | 1.43 | 0.51 | 0.46 | 1.11 |
| YLL045C   | RPL8B | 6499 | 4552 | 1.43 | 0.51 | 0.46 | 1.10 |
| YMR067C   |       | 599  | 420  | 1.43 | 0.51 | 0.46 | 1.10 |
| YKR072C   | SIS2  | 2824 | 1979 | 1.43 | 0.51 | 0.46 | 1.10 |
| YHR025W   | THR1  | 1832 | 1284 | 1.43 | 0.51 | 0.46 | 1.10 |
| YPL198W   | RPL7B | 4374 | 3067 | 1.43 | 0.51 | 0.46 | 1.10 |
| YPL097W   | MSY1  | 1854 | 1300 | 1.43 | 0.51 | 0.46 | 1.10 |
| YPL094C   | SEC62 | 2545 | 1785 | 1.43 | 0.51 | 0.46 | 1.10 |
| YHR016C   | YSC84 | 1092 | 766  | 1.43 | 0.51 | 0.46 | 1.10 |
| YLR134W   | PDC5  | 4426 | 3104 | 1.43 | 0.51 | 0.46 | 1.10 |
| YLR108C   |       | 2644 | 1855 | 1.43 | 0.51 | 0.46 | 1.10 |
| YOR201C   | PET56 | 1361 | 955  | 1.43 | 0.51 | 0.45 | 1.10 |
| YMR234W   | RNH1  | 2896 | 2033 | 1.42 | 0.51 | 0.45 | 1.10 |

|           |        |      |      |      |      |      |      |
|-----------|--------|------|------|------|------|------|------|
| YHL001W   | RPL14B | 1235 | 867  | 1.42 | 0.51 | 0.45 | 1.10 |
| YIL121W   |        | 929  | 652  | 1.42 | 0.51 | 0.45 | 1.10 |
| YMR257C   | PET111 | 3669 | 2576 | 1.42 | 0.51 | 0.45 | 1.10 |
| YAL021C   | CCR4   | 2711 | 1904 | 1.42 | 0.51 | 0.45 | 1.10 |
| YGL129C   |        | 2858 | 2007 | 1.42 | 0.51 | 0.45 | 1.10 |
| YDR433W   |        | 3613 | 2538 | 1.42 | 0.51 | 0.45 | 1.10 |
| YIL122W   |        | 1912 | 1343 | 1.42 | 0.51 | 0.45 | 1.10 |
| YKL117W   | SBA1   | 4366 | 3068 | 1.42 | 0.51 | 0.45 | 1.09 |
| YGR214W   | RPS0A  | 4012 | 2819 | 1.42 | 0.51 | 0.45 | 1.09 |
| YPR165W   | RHO1   | 1551 | 1090 | 1.42 | 0.51 | 0.45 | 1.09 |
| YCL036W   |        | 4525 | 3180 | 1.42 | 0.51 | 0.45 | 1.09 |
| YHR011W   |        | 750  | 527  | 1.42 | 0.51 | 0.45 | 1.09 |
| YPL256C   | CLN2   | 1780 | 1252 | 1.42 | 0.51 | 0.45 | 1.09 |
| YPR026W   | ATH1   | 1587 | 1117 | 1.42 | 0.51 | 0.45 | 1.09 |
| YMR052C-A |        | 524  | 369  | 1.42 | 0.51 | 0.45 | 1.09 |
| YOL060C   | AMI3   | 3909 | 2751 | 1.42 | 0.51 | 0.45 | 1.09 |
| YGRO90W   |        | 1844 | 1298 | 1.42 | 0.51 | 0.45 | 1.09 |
| YBR060C   | ORC2   | 2500 | 1761 | 1.42 | 0.51 | 0.45 | 1.09 |
| YPL227C   | ALG5   | 576  | 406  | 1.42 | 0.51 | 0.45 | 1.09 |
| YOR311C   |        | 1655 | 1166 | 1.42 | 0.51 | 0.45 | 1.09 |
| YCL062W   |        | 750  | 528  | 1.42 | 0.51 | 0.45 | 1.09 |
| YGL166W   | CUP2   | 585  | 412  | 1.42 | 0.51 | 0.45 | 1.08 |
| YDR429C   | TIF35  | 2525 | 1779 | 1.42 | 0.50 | 0.45 | 1.08 |
| YPR108W   | RPN7   | 4863 | 3428 | 1.42 | 0.50 | 0.45 | 1.08 |
| YNL178W   | RPS3   | 496  | 350  | 1.42 | 0.50 | 0.45 | 1.08 |
| YLR206W   | ENT2   | 3343 | 2357 | 1.42 | 0.50 | 0.45 | 1.08 |
| YLR190W   |        | 2119 | 1494 | 1.42 | 0.50 | 0.45 | 1.08 |
| YPR016C   | TIF6   | 2048 | 1444 | 1.42 | 0.50 | 0.45 | 1.08 |
| YMR027W   | HRT2   | 2246 | 1585 | 1.42 | 0.50 | 0.45 | 1.08 |
| YOL129W   |        | 567  | 400  | 1.42 | 0.50 | 0.45 | 1.08 |
| YFL016C   | MDJ1   | 2452 | 1731 | 1.42 | 0.50 | 0.45 | 1.08 |
| YBL098W   |        | 561  | 396  | 1.42 | 0.50 | 0.45 | 1.08 |
| YIL106W   | MOB1   | 1315 | 929  | 1.42 | 0.50 | 0.45 | 1.08 |
| YLR054C   |        | 2112 | 1492 | 1.42 | 0.50 | 0.45 | 1.07 |
| YIL140W   | SRO4   | 1988 | 1405 | 1.42 | 0.50 | 0.44 | 1.07 |
| YLR045C   | STU2   | 2044 | 1445 | 1.41 | 0.50 | 0.44 | 1.07 |

|         |        |      |      |      |      |      |      |
|---------|--------|------|------|------|------|------|------|
| YOR090C | PTC5   | 2802 | 1981 | 1.41 | 0.50 | 0.44 | 1.07 |
| YGL223C |        | 1283 | 908  | 1.41 | 0.50 | 0.44 | 1.07 |
| YLR238W |        | 1733 | 1226 | 1.41 | 0.50 | 0.44 | 1.07 |
| YLR335W | NUP2   | 958  | 678  | 1.41 | 0.50 | 0.44 | 1.07 |
| YPL260W |        | 1843 | 1305 | 1.41 | 0.50 | 0.44 | 1.07 |
| YKL057C | NUP120 | 408  | 289  | 1.41 | 0.50 | 0.44 | 1.07 |
| YGR150C |        | 1190 | 843  | 1.41 | 0.50 | 0.44 | 1.07 |
| YGL242C |        | 1263 | 895  | 1.41 | 0.50 | 0.44 | 1.06 |
| YDL083C | RPS16B | 2677 | 1898 | 1.41 | 0.50 | 0.44 | 1.06 |
| YOR065W | CYT1   | 1395 | 989  | 1.41 | 0.50 | 0.44 | 1.06 |
| YKL100C |        | 2812 | 1994 | 1.41 | 0.50 | 0.44 | 1.06 |
| YGR279C | SCW4   | 4236 | 3004 | 1.41 | 0.50 | 0.44 | 1.06 |
| YGR296W | YRF1-3 | 1642 | 1165 | 1.41 | 0.50 | 0.44 | 1.06 |
| YNL239W | LAP3   | 4721 | 3350 | 1.41 | 0.49 | 0.44 | 1.06 |
| YCRO28C | FEN2   | 1878 | 1333 | 1.41 | 0.49 | 0.44 | 1.06 |
| YDR384C |        | 690  | 490  | 1.41 | 0.49 | 0.44 | 1.06 |
| YOLO36W |        | 2063 | 1465 | 1.41 | 0.49 | 0.44 | 1.06 |
| YPR185W | APG13  | 3054 | 2169 | 1.41 | 0.49 | 0.44 | 1.06 |
| YDL176W |        | 1751 | 1244 | 1.41 | 0.49 | 0.44 | 1.06 |
| YPL084W | BRO1   | 1200 | 853  | 1.41 | 0.49 | 0.44 | 1.05 |
| YPRO08W |        | 1796 | 1277 | 1.41 | 0.49 | 0.44 | 1.05 |
| YJL141C | YAK1   | 1700 | 1209 | 1.41 | 0.49 | 0.44 | 1.05 |
| YCRO43C |        | 857  | 610  | 1.41 | 0.49 | 0.43 | 1.05 |
| YOR208W | PTP2   | 1150 | 819  | 1.40 | 0.49 | 0.43 | 1.05 |
| YHR141C | RPL42B | 1081 | 770  | 1.40 | 0.49 | 0.43 | 1.05 |
| YGL103W | RPL28  | 6290 | 4480 | 1.40 | 0.49 | 0.43 | 1.05 |
| YDR014W |        | 608  | 433  | 1.40 | 0.49 | 0.43 | 1.05 |
| YGL013C | PDR1   | 1472 | 1049 | 1.40 | 0.49 | 0.43 | 1.05 |
| YDR094W |        | 919  | 655  | 1.40 | 0.49 | 0.43 | 1.04 |
| YNL021W | HDA1   | 2893 | 2062 | 1.40 | 0.49 | 0.43 | 1.04 |
| YAL055W |        | 398  | 284  | 1.40 | 0.49 | 0.43 | 1.04 |
| YNL090W | RHO2   | 1109 | 791  | 1.40 | 0.49 | 0.43 | 1.04 |
| YHR055C | CUP1-2 | 757  | 540  | 1.40 | 0.49 | 0.43 | 1.04 |
| YLR351C | NIT3   | 828  | 591  | 1.40 | 0.49 | 0.43 | 1.04 |
| YGL225W | GOG5   | 1247 | 890  | 1.40 | 0.49 | 0.43 | 1.04 |
| YPL255W | BBP1   | 769  | 549  | 1.40 | 0.49 | 0.43 | 1.04 |

|            |            |      |      |      |      |      |      |
|------------|------------|------|------|------|------|------|------|
| YPR190C    | RPC82      | 2056 | 1469 | 1.40 | 0.49 | 0.43 | 1.04 |
| YBL091C    | MAP2       | 2016 | 1441 | 1.40 | 0.48 | 0.43 | 1.03 |
| YCRWdelta9 | YCRWdelta9 | 631  | 451  | 1.40 | 0.48 | 0.43 | 1.03 |
| YDR380W    |            | 1127 | 806  | 1.40 | 0.48 | 0.43 | 1.03 |
| YFL049W    |            | 1164 | 832  | 1.40 | 0.48 | 0.43 | 1.03 |
| YPRO83W    |            | 1110 | 794  | 1.40 | 0.48 | 0.43 | 1.03 |
| YPR198W    | SGE1       | 831  | 594  | 1.40 | 0.48 | 0.43 | 1.03 |
| YGR293C    |            | 777  | 556  | 1.40 | 0.48 | 0.43 | 1.03 |
| YMR220W    | ERG8       | 492  | 352  | 1.40 | 0.48 | 0.43 | 1.03 |
| YGL110C    |            | 976  | 699  | 1.40 | 0.48 | 0.43 | 1.03 |
| YMR116C    | ASC1       | 2182 | 1563 | 1.40 | 0.48 | 0.43 | 1.03 |
| YJR097W    |            | 1653 | 1184 | 1.40 | 0.48 | 0.43 | 1.03 |
| YLR326W    |            | 777  | 557  | 1.40 | 0.48 | 0.42 | 1.03 |
| YGR154C    |            | 1006 | 721  | 1.40 | 0.48 | 0.42 | 1.03 |
| YOR067C    | ALG8       | 1482 | 1062 | 1.40 | 0.48 | 0.42 | 1.03 |
| YMR310C    |            | 2196 | 1574 | 1.40 | 0.48 | 0.42 | 1.03 |
| YJR073C    | OPI3       | 1780 | 1276 | 1.39 | 0.48 | 0.42 | 1.02 |
| YNL086W    |            | 2516 | 1804 | 1.39 | 0.48 | 0.42 | 1.02 |
| YNL112W    | DBP2       | 4056 | 2909 | 1.39 | 0.48 | 0.42 | 1.02 |
| YOR171C    | LCB4       | 1764 | 1266 | 1.39 | 0.48 | 0.42 | 1.02 |
| YKR087C    |            | 656  | 471  | 1.39 | 0.48 | 0.42 | 1.02 |
| YNL255C    | GIS2       | 4209 | 3022 | 1.39 | 0.48 | 0.42 | 1.02 |
| YDR300C    | PRO1       | 1422 | 1021 | 1.39 | 0.48 | 0.42 | 1.02 |
| YOR347C    | PYK2       | 895  | 643  | 1.39 | 0.48 | 0.42 | 1.02 |
| YDR118W    | APC4       | 1856 | 1334 | 1.39 | 0.48 | 0.42 | 1.02 |
| YBR076W    | ECM8       | 878  | 631  | 1.39 | 0.48 | 0.42 | 1.01 |
| YAL003W    | EFB1       | 5198 | 3737 | 1.39 | 0.48 | 0.42 | 1.01 |
| YFL018C    | LPD1       | 2022 | 1454 | 1.39 | 0.48 | 0.42 | 1.01 |
| YOL100W    | PKH2       | 5784 | 4161 | 1.39 | 0.48 | 0.42 | 1.01 |
| YNL127W    |            | 2121 | 1527 | 1.39 | 0.47 | 0.42 | 1.01 |
| YLL010C    |            | 2010 | 1447 | 1.39 | 0.47 | 0.42 | 1.01 |
| YFL035C    |            | 671  | 483  | 1.39 | 0.47 | 0.42 | 1.01 |
| YBL005W    | PDR3       | 2307 | 1661 | 1.39 | 0.47 | 0.42 | 1.01 |
| YEL043W    |            | 2404 | 1731 | 1.39 | 0.47 | 0.42 | 1.01 |
| YER117W    | RPL23B     | 2577 | 1856 | 1.39 | 0.47 | 0.42 | 1.01 |
| YNL258C    |            | 2615 | 1884 | 1.39 | 0.47 | 0.42 | 1.01 |



|            |            |      |      |      |      |      |      |
|------------|------------|------|------|------|------|------|------|
| YCL065W    |            | 466  | 336  | 1.39 | 0.47 | 0.42 | 1.01 |
| YPR178W    | PRP4       | 1675 | 1207 | 1.39 | 0.47 | 0.42 | 1.01 |
| YFR031C-A  | RPL2A      | 5257 | 3790 | 1.39 | 0.47 | 0.42 | 1.00 |
| YNL110C    |            | 1327 | 957  | 1.39 | 0.47 | 0.42 | 1.00 |
| YDR413C    |            | 2532 | 1826 | 1.39 | 0.47 | 0.42 | 1.00 |
| YGR118W    | RPS23A     | 1963 | 1416 | 1.39 | 0.47 | 0.41 | 1.00 |
| YOL034W    |            | 1717 | 1239 | 1.39 | 0.47 | 0.41 | 1.00 |
| YGR155W    | CYS4       | 4874 | 3517 | 1.39 | 0.47 | 0.41 | 1.00 |
| YNL303W    |            | 1535 | 1108 | 1.39 | 0.47 | 0.41 | 1.00 |
| YMR134W    |            | 951  | 686  | 1.39 | 0.47 | 0.41 | 1.00 |
| YIRO11C    | STS1       | 1107 | 799  | 1.39 | 0.47 | 0.41 | 1.00 |
| YLR093C    | NYV1       | 687  | 496  | 1.38 | 0.47 | 0.41 | 1.00 |
| YDL014W    | NOP1       | 4868 | 3517 | 1.38 | 0.47 | 0.41 | 1.00 |
| YDR050C    | TPI1       | 3568 | 2579 | 1.38 | 0.47 | 0.41 | 1.00 |
| YJR002W    | MPP10      | 737  | 533  | 1.38 | 0.47 | 0.41 | 1.00 |
| YPL096W    |            | 884  | 639  | 1.38 | 0.47 | 0.41 | 0.99 |
| YLR237W    | THI7       | 1302 | 941  | 1.38 | 0.47 | 0.41 | 0.99 |
| YCRO61W    |            | 2285 | 1652 | 1.38 | 0.47 | 0.41 | 0.99 |
| YKL128C    | PMU1       | 1606 | 1161 | 1.38 | 0.47 | 0.41 | 0.99 |
| YER165W    | PAB1       | 3066 | 2217 | 1.38 | 0.47 | 0.41 | 0.99 |
| YLR110C    |            | 2169 | 1569 | 1.38 | 0.47 | 0.41 | 0.99 |
| YLR150W    | STM1       | 7312 | 5292 | 1.38 | 0.47 | 0.41 | 0.99 |
| YPR010C    | RPA135     | 3364 | 2435 | 1.38 | 0.47 | 0.41 | 0.99 |
| YOR154W    |            | 1101 | 797  | 1.38 | 0.47 | 0.41 | 0.99 |
| YIL109C    | SEC24      | 5498 | 3983 | 1.38 | 0.47 | 0.41 | 0.99 |
| YHL039W    |            | 1916 | 1388 | 1.38 | 0.46 | 0.41 | 0.99 |
| YNR048W    |            | 2590 | 1877 | 1.38 | 0.46 | 0.41 | 0.99 |
| YAL009W    | SPO7       | 406  | 294  | 1.38 | 0.46 | 0.41 | 0.99 |
| YGR170W    | PSD2       | 2166 | 1571 | 1.38 | 0.46 | 0.41 | 0.98 |
| YMR302C    | PRP12      | 1859 | 1348 | 1.38 | 0.46 | 0.41 | 0.98 |
| YFR051C    | RET2       | 2934 | 2129 | 1.38 | 0.46 | 0.41 | 0.98 |
| YOR373W    | NUD1       | 2270 | 1648 | 1.38 | 0.46 | 0.41 | 0.98 |
| YLR391W    |            | 843  | 612  | 1.38 | 0.46 | 0.41 | 0.98 |
| YKRO27W    |            | 2601 | 1890 | 1.38 | 0.46 | 0.40 | 0.98 |
| YLR227C    |            | 4417 | 3210 | 1.38 | 0.46 | 0.40 | 0.98 |
| YBLWdelta1 | YBLWdelta1 | 1222 | 888  | 1.38 | 0.46 | 0.40 | 0.98 |

|         |       |       |       |      |      |      |      |
|---------|-------|-------|-------|------|------|------|------|
| YER132C | PMD1  | 3859  | 2805  | 1.38 | 0.46 | 0.40 | 0.98 |
| YDR226W | ADK1  | 2910  | 2116  | 1.38 | 0.46 | 0.40 | 0.97 |
| YJL013C | MAD3  | 3509  | 2553  | 1.37 | 0.46 | 0.40 | 0.97 |
| YCR037C | PHO87 | 1435  | 1044  | 1.37 | 0.46 | 0.40 | 0.97 |
| YPL091W | GLR1  | 1681  | 1223  | 1.37 | 0.46 | 0.40 | 0.97 |
| YLR337C | VRP1  | 591   | 430   | 1.37 | 0.46 | 0.40 | 0.97 |
| YOR069W | VPS5  | 1493  | 1087  | 1.37 | 0.46 | 0.40 | 0.97 |
| YBR035C | PDX3  | 1354  | 986   | 1.37 | 0.46 | 0.40 | 0.97 |
| YBR228W |       | 9099  | 6628  | 1.37 | 0.46 | 0.40 | 0.97 |
| YOL097C | WRS1  | 1242  | 905   | 1.37 | 0.46 | 0.40 | 0.97 |
| YNL033W |       | 1399  | 1019  | 1.37 | 0.46 | 0.40 | 0.97 |
| YBL003C | HTA2  | 2675  | 1949  | 1.37 | 0.46 | 0.40 | 0.97 |
| YOR259C | RPT4  | 1914  | 1395  | 1.37 | 0.46 | 0.40 | 0.97 |
| YOR302W |       | 484   | 353   | 1.37 | 0.46 | 0.40 | 0.97 |
| YPR036W | VMA13 | 1974  | 1439  | 1.37 | 0.46 | 0.40 | 0.97 |
| YJL105W |       | 1129  | 823   | 1.37 | 0.46 | 0.40 | 0.96 |
| YOR198C | BFR1  | 5644  | 4116  | 1.37 | 0.46 | 0.40 | 0.96 |
| YOR299W | BUD7  | 498   | 363   | 1.37 | 0.46 | 0.40 | 0.96 |
| YGR010W |       | 1655  | 1208  | 1.37 | 0.45 | 0.40 | 0.96 |
| YOR043W | WHI2  | 2348  | 1714  | 1.37 | 0.45 | 0.40 | 0.96 |
| YHR207C |       | 501   | 366   | 1.37 | 0.45 | 0.40 | 0.96 |
| YJR148W | BAT2  | 1969  | 1438  | 1.37 | 0.45 | 0.40 | 0.96 |
| YNL032W | SIW14 | 1854  | 1354  | 1.37 | 0.45 | 0.40 | 0.96 |
| YLR170C | APS1  | 14282 | 10432 | 1.37 | 0.45 | 0.40 | 0.96 |
| YNL126W | SPC98 | 923   | 674   | 1.37 | 0.45 | 0.40 | 0.96 |
| YDR035W | ARO3  | 1900  | 1390  | 1.37 | 0.45 | 0.39 | 0.95 |
| YBR168W |       | 4257  | 3116  | 1.37 | 0.45 | 0.39 | 0.95 |
| YHR072W | ERG7  | 1952  | 1429  | 1.37 | 0.45 | 0.39 | 0.95 |
| YGR119C | NUP57 | 3958  | 2898  | 1.37 | 0.45 | 0.39 | 0.95 |
| YER164W | CHD1  | 2763  | 2024  | 1.37 | 0.45 | 0.39 | 0.95 |
| YLR211C |       | 3102  | 2273  | 1.36 | 0.45 | 0.39 | 0.95 |
| YGR133W | PEX4  | 980   | 718   | 1.36 | 0.45 | 0.39 | 0.95 |
| YPL238C |       | 3094  | 2268  | 1.36 | 0.45 | 0.39 | 0.95 |
| YGL009C | LEU1  | 5123  | 3758  | 1.36 | 0.45 | 0.39 | 0.94 |
| YCR036W | RBK1  | 954   | 700   | 1.36 | 0.45 | 0.39 | 0.94 |
| YMR091C | NPL6  | 2355  | 1728  | 1.36 | 0.45 | 0.39 | 0.94 |

|            |            |      |      |      |      |      |      |
|------------|------------|------|------|------|------|------|------|
| YAL034W-A  | MTW1       | 2964 | 2175 | 1.36 | 0.45 | 0.39 | 0.94 |
| YMR191W    |            | 2985 | 2191 | 1.36 | 0.45 | 0.39 | 0.94 |
| YMR196W    |            | 1538 | 1129 | 1.36 | 0.45 | 0.39 | 0.94 |
| YJR080C    |            | 1322 | 972  | 1.36 | 0.44 | 0.39 | 0.94 |
| YLR417W    | VPS36      | 696  | 512  | 1.36 | 0.44 | 0.39 | 0.94 |
| YHR139C    | SPS100     | 2322 | 1708 | 1.36 | 0.44 | 0.39 | 0.94 |
| YIL092W    |            | 465  | 342  | 1.36 | 0.44 | 0.39 | 0.93 |
| YPL225W    |            | 776  | 571  | 1.36 | 0.44 | 0.39 | 0.93 |
| YLR268W    | SEC22      | 987  | 726  | 1.36 | 0.44 | 0.39 | 0.93 |
| YKL108W    | SLD2       | 466  | 343  | 1.36 | 0.44 | 0.39 | 0.93 |
| YGR282C    | BGL2       | 2690 | 1980 | 1.36 | 0.44 | 0.39 | 0.93 |
| YMR004W    | MVP1       | 2009 | 1479 | 1.36 | 0.44 | 0.39 | 0.93 |
| YGR250C    |            | 2435 | 1793 | 1.36 | 0.44 | 0.39 | 0.93 |
| YOR160W    | MTR10      | 884  | 651  | 1.36 | 0.44 | 0.39 | 0.93 |
| YDR117C    |            | 2591 | 1909 | 1.36 | 0.44 | 0.38 | 0.93 |
| YLR192C    | HCR1       | 1977 | 1457 | 1.36 | 0.44 | 0.38 | 0.93 |
| YELO31W    | SPF1       | 697  | 514  | 1.36 | 0.44 | 0.38 | 0.93 |
| YJL069C    |            | 1782 | 1314 | 1.36 | 0.44 | 0.38 | 0.93 |
| YML054C    | CYB2       | 2190 | 1615 | 1.36 | 0.44 | 0.38 | 0.93 |
| YDR012W    | RPL4B      | 3017 | 2225 | 1.36 | 0.44 | 0.38 | 0.93 |
| YKL120W    | OAC1       | 565  | 417  | 1.36 | 0.44 | 0.38 | 0.93 |
| YMR145C    |            | 1838 | 1356 | 1.36 | 0.44 | 0.38 | 0.92 |
| YPR102C    | RPL11A     | 1717 | 1267 | 1.36 | 0.44 | 0.38 | 0.92 |
| YPL154C    | PEP4       | 4552 | 3359 | 1.36 | 0.44 | 0.38 | 0.92 |
| YIL125W    | KGD1       | 4087 | 3016 | 1.35 | 0.44 | 0.38 | 0.92 |
| YIL090W    |            | 2552 | 1884 | 1.35 | 0.44 | 0.38 | 0.92 |
| YDR426C    |            | 1653 | 1220 | 1.35 | 0.44 | 0.38 | 0.92 |
| YILWTy3-1C | YILWTy3-1C | 1962 | 1448 | 1.35 | 0.44 | 0.38 | 0.92 |
| YMR011W    | HXT2       | 3159 | 2332 | 1.35 | 0.44 | 0.38 | 0.92 |
| YGR160W    |            | 5452 | 4025 | 1.35 | 0.44 | 0.38 | 0.92 |
| YMR268C    | PRP24      | 1600 | 1181 | 1.35 | 0.44 | 0.38 | 0.92 |
| YBR122C    | MRPL36     | 6013 | 4440 | 1.35 | 0.44 | 0.38 | 0.92 |
| YDR529C    | QCR7       | 1602 | 1183 | 1.35 | 0.44 | 0.38 | 0.92 |
| YGR175C    | ERG1       | 2463 | 1819 | 1.35 | 0.44 | 0.38 | 0.92 |
| YGR085C    | RPL11B     | 4466 | 3299 | 1.35 | 0.44 | 0.38 | 0.92 |
| YLL001W    | DNM1       | 999  | 738  | 1.35 | 0.44 | 0.38 | 0.92 |

|         |        |       |      |      |      |      |      |
|---------|--------|-------|------|------|------|------|------|
| YLR409C |        | 2350  | 1737 | 1.35 | 0.44 | 0.38 | 0.92 |
| YJL193W |        | 1176  | 869  | 1.35 | 0.44 | 0.38 | 0.92 |
| YER131W | RPS26B | 5759  | 4257 | 1.35 | 0.44 | 0.38 | 0.92 |
| YKR053C | YSR3   | 602   | 445  | 1.35 | 0.44 | 0.38 | 0.92 |
| YLR370C | ARC18  | 1369  | 1013 | 1.35 | 0.43 | 0.38 | 0.91 |
| YMR295C |        | 2462  | 1821 | 1.35 | 0.43 | 0.38 | 0.91 |
| YAL004W |        | 10681 | 7905 | 1.35 | 0.43 | 0.38 | 0.91 |
| YCR014C | POL4   | 1577  | 1167 | 1.35 | 0.43 | 0.38 | 0.91 |
| YLR425W | TUS1   | 984   | 729  | 1.35 | 0.43 | 0.38 | 0.91 |
| YJL075C |        | 975   | 722  | 1.35 | 0.43 | 0.38 | 0.91 |
| YCLX04W |        | 717   | 531  | 1.35 | 0.43 | 0.38 | 0.91 |
| YNL273W | TOF1   | 837   | 620  | 1.35 | 0.43 | 0.38 | 0.91 |
| YFR053C | HXK1   | 1399  | 1037 | 1.35 | 0.43 | 0.38 | 0.91 |
| YGR171C | MSM1   | 972   | 721  | 1.35 | 0.43 | 0.38 | 0.91 |
| YOR355W | GDS1   | 4175  | 3100 | 1.35 | 0.43 | 0.37 | 0.90 |
| YJL209W | CBP1   | 1780  | 1322 | 1.35 | 0.43 | 0.37 | 0.90 |
| YDR221W |        | 1012  | 752  | 1.35 | 0.43 | 0.37 | 0.90 |
| YBR029C | CDS1   | 1061  | 788  | 1.35 | 0.43 | 0.37 | 0.90 |
| YJR130C |        | 763   | 567  | 1.35 | 0.43 | 0.37 | 0.90 |
| YDR185C |        | 4085  | 3037 | 1.35 | 0.43 | 0.37 | 0.90 |
| YNL204C | SPS18  | 982   | 730  | 1.35 | 0.43 | 0.37 | 0.90 |
| YGR267C | FOL2   | 1322  | 983  | 1.35 | 0.43 | 0.37 | 0.90 |
| YBR161W |        | 655   | 487  | 1.35 | 0.43 | 0.37 | 0.90 |
| YKL206C |        | 866   | 644  | 1.34 | 0.43 | 0.37 | 0.90 |
| YPR079W |        | 2539  | 1889 | 1.34 | 0.43 | 0.37 | 0.89 |
| YDR225W | HTA1   | 4548  | 3384 | 1.34 | 0.43 | 0.37 | 0.89 |
| YDR128W |        | 1309  | 974  | 1.34 | 0.43 | 0.37 | 0.89 |
| YBR283C | SSH1   | 4703  | 3500 | 1.34 | 0.43 | 0.37 | 0.89 |
| YLR236C |        | 392   | 292  | 1.34 | 0.43 | 0.37 | 0.89 |
| YPL202C |        | 5046  | 3757 | 1.34 | 0.43 | 0.37 | 0.89 |
| YER180C | ISC10  | 481   | 358  | 1.34 | 0.43 | 0.37 | 0.89 |
| YKR056W | RNC1   | 1639  | 1221 | 1.34 | 0.43 | 0.37 | 0.89 |
| YGR177C | ATF2   | 2655  | 1979 | 1.34 | 0.42 | 0.37 | 0.89 |
| YPR171W |        | 934   | 696  | 1.34 | 0.42 | 0.37 | 0.89 |
| YOR167C | RPS28A | 5156  | 3844 | 1.34 | 0.42 | 0.37 | 0.89 |
| YKL144C | RPC25  | 1510  | 1126 | 1.34 | 0.42 | 0.37 | 0.89 |

|            |            |      |      |      |      |      |      |
|------------|------------|------|------|------|------|------|------|
| YDL238C    |            | 1250 | 932  | 1.34 | 0.42 | 0.37 | 0.89 |
| YGR135W    | PRE9       | 1562 | 1165 | 1.34 | 0.42 | 0.37 | 0.89 |
| YJR095W    | SFC1       | 775  | 578  | 1.34 | 0.42 | 0.37 | 0.89 |
| YFR052W    | RPN12      | 3542 | 2642 | 1.34 | 0.42 | 0.37 | 0.89 |
| YHL007C    | STE20      | 3824 | 2853 | 1.34 | 0.42 | 0.37 | 0.88 |
| YPR114W    |            | 1718 | 1282 | 1.34 | 0.42 | 0.37 | 0.88 |
| YBR205W    | KTR3       | 4768 | 3558 | 1.34 | 0.42 | 0.37 | 0.88 |
| YDR152W    |            | 2445 | 1825 | 1.34 | 0.42 | 0.37 | 0.88 |
| YGL212W    | VAM7       | 633  | 473  | 1.34 | 0.42 | 0.36 | 0.88 |
| YDL150W    | RPC53      | 2648 | 1979 | 1.34 | 0.42 | 0.36 | 0.88 |
| YOR115C    | TRS33      | 510  | 381  | 1.34 | 0.42 | 0.36 | 0.88 |
| YKL039W    | PTM1       | 1136 | 849  | 1.34 | 0.42 | 0.36 | 0.88 |
| YIL019W    |            | 2285 | 1709 | 1.34 | 0.42 | 0.36 | 0.88 |
| YEL075C    |            | 6277 | 4697 | 1.34 | 0.42 | 0.36 | 0.87 |
| YGL075C    | MPS2       | 1201 | 899  | 1.34 | 0.42 | 0.36 | 0.87 |
| YLR250W    | SSP120     | 750  | 561  | 1.34 | 0.42 | 0.36 | 0.87 |
| YHLCsigma1 | YHLCsigma1 | 492  | 368  | 1.34 | 0.42 | 0.36 | 0.87 |
| YER026C    | CHO1       | 3814 | 2856 | 1.34 | 0.42 | 0.36 | 0.87 |
| YPL180W    |            | 1207 | 904  | 1.34 | 0.42 | 0.36 | 0.87 |
| YNL163C    |            | 794  | 595  | 1.33 | 0.42 | 0.36 | 0.87 |
| YER154W    | OXA1       | 1267 | 949  | 1.33 | 0.42 | 0.36 | 0.87 |
| YEL042W    | GDA1       | 1024 | 768  | 1.33 | 0.42 | 0.36 | 0.87 |
| YBR220C    |            | 1906 | 1429 | 1.33 | 0.42 | 0.36 | 0.87 |
| YKL025C    | PAN3       | 1382 | 1036 | 1.33 | 0.42 | 0.36 | 0.87 |
| YHL029C    |            | 1775 | 1332 | 1.33 | 0.41 | 0.36 | 0.86 |
| YOL082W    |            | 1049 | 787  | 1.33 | 0.41 | 0.36 | 0.86 |
| YML035C-A  |            | 1102 | 827  | 1.33 | 0.41 | 0.36 | 0.86 |
| YKL194C    | MST1       | 360  | 270  | 1.33 | 0.41 | 0.36 | 0.86 |
| YNL196C    | SLZ1       | 1344 | 1010 | 1.33 | 0.41 | 0.36 | 0.86 |
| YOR102W    |            | 605  | 455  | 1.33 | 0.41 | 0.36 | 0.86 |
| YOR321W    | PMT3       | 1145 | 861  | 1.33 | 0.41 | 0.36 | 0.86 |
| YBL092W    | RPL32      | 4342 | 3264 | 1.33 | 0.41 | 0.36 | 0.86 |
| YGR195W    | SKI6       | 1704 | 1281 | 1.33 | 0.41 | 0.36 | 0.86 |
| YHR144C    | DCD1       | 746  | 561  | 1.33 | 0.41 | 0.35 | 0.86 |
| YNR063W    |            | 448  | 337  | 1.33 | 0.41 | 0.35 | 0.86 |
| YKRO23W    |            | 1460 | 1099 | 1.33 | 0.41 | 0.35 | 0.85 |

|           |        |      |      |      |      |      |      |
|-----------|--------|------|------|------|------|------|------|
| YML032C   | RAD52  | 6473 | 4872 | 1.33 | 0.41 | 0.35 | 0.85 |
| YHR040W   |        | 1384 | 1042 | 1.33 | 0.41 | 0.35 | 0.85 |
| YOR140W   | SFL1   | 1357 | 1022 | 1.33 | 0.41 | 0.35 | 0.85 |
| YOR315W   |        | 1317 | 992  | 1.33 | 0.41 | 0.35 | 0.85 |
| YJR016C   | ILV3   | 2905 | 2188 | 1.33 | 0.41 | 0.35 | 0.85 |
| YGL111W   |        | 2712 | 2043 | 1.33 | 0.41 | 0.35 | 0.85 |
| YHR066W   | SSF1   | 1089 | 820  | 1.33 | 0.41 | 0.35 | 0.85 |
| YOR173W   |        | 1725 | 1300 | 1.33 | 0.41 | 0.35 | 0.85 |
| YPL036W   | PMA2   | 746  | 562  | 1.33 | 0.41 | 0.35 | 0.85 |
| YOL076W   | MDM20  | 2694 | 2030 | 1.33 | 0.41 | 0.35 | 0.85 |
| YLR167W   | RPS31  | 2124 | 1601 | 1.33 | 0.41 | 0.35 | 0.85 |
| YDR062W   | LCB2   | 5479 | 4131 | 1.33 | 0.41 | 0.35 | 0.85 |
| YNL034W   |        | 3090 | 2330 | 1.33 | 0.41 | 0.35 | 0.85 |
| YNR045W   | PET494 | 557  | 420  | 1.33 | 0.41 | 0.35 | 0.85 |
| YKL047W   |        | 1020 | 769  | 1.33 | 0.41 | 0.35 | 0.85 |
| YFL035C-B |        | 1905 | 1437 | 1.33 | 0.41 | 0.35 | 0.85 |
| YFL061W   |        | 435  | 328  | 1.33 | 0.41 | 0.35 | 0.85 |
| YIL083C   |        | 1039 | 784  | 1.33 | 0.41 | 0.35 | 0.85 |
| YKR089C   |        | 775  | 585  | 1.32 | 0.41 | 0.35 | 0.84 |
| YJR105W   |        | 3560 | 2688 | 1.32 | 0.41 | 0.35 | 0.84 |
| YNR008W   | LRO1   | 4215 | 3183 | 1.32 | 0.41 | 0.35 | 0.84 |
| YBR121C   | GRS1   | 6478 | 4894 | 1.32 | 0.40 | 0.35 | 0.84 |
| YJR100C   |        | 670  | 506  | 1.32 | 0.40 | 0.35 | 0.84 |
| YDL069C   | CBS1   | 456  | 345  | 1.32 | 0.40 | 0.35 | 0.84 |
| YNL099C   |        | 3555 | 2687 | 1.32 | 0.40 | 0.35 | 0.84 |
| YHL026C   |        | 443  | 335  | 1.32 | 0.40 | 0.35 | 0.84 |
| YBR299W   | MAL32  | 7265 | 5493 | 1.32 | 0.40 | 0.35 | 0.84 |
| YIRO12W   | SQT1   | 2268 | 1715 | 1.32 | 0.40 | 0.35 | 0.84 |
| YLR222C   |        | 2010 | 1521 | 1.32 | 0.40 | 0.35 | 0.84 |
| YPR139C   |        | 1911 | 1446 | 1.32 | 0.40 | 0.35 | 0.84 |
| YBR063C   |        | 1115 | 844  | 1.32 | 0.40 | 0.35 | 0.84 |
| YGL155W   | CDC43  | 2671 | 2022 | 1.32 | 0.40 | 0.35 | 0.83 |
| YKL006C-A | SFT1   | 699  | 529  | 1.32 | 0.40 | 0.35 | 0.83 |
| YOL026C   |        | 1020 | 772  | 1.32 | 0.40 | 0.35 | 0.83 |
| YDR359C   |        | 2186 | 1655 | 1.32 | 0.40 | 0.35 | 0.83 |
| YPL151C   | PRP46  | 1851 | 1402 | 1.32 | 0.40 | 0.34 | 0.83 |

|             |             |      |      |      |      |      |      |
|-------------|-------------|------|------|------|------|------|------|
| YDR381W     | YRA1        | 1624 | 1231 | 1.32 | 0.40 | 0.34 | 0.83 |
| YMR032W     | HOF1        | 1167 | 885  | 1.32 | 0.40 | 0.34 | 0.83 |
| YBR111C     | YSA1        | 918  | 696  | 1.32 | 0.40 | 0.34 | 0.83 |
| YOR337W     | TEA1        | 2638 | 2001 | 1.32 | 0.40 | 0.34 | 0.83 |
| YMR254C     |             | 1127 | 855  | 1.32 | 0.40 | 0.34 | 0.83 |
| YER133W     | GLC7        | 2405 | 1824 | 1.32 | 0.40 | 0.34 | 0.83 |
| YNR041C     | COQ2        | 832  | 631  | 1.32 | 0.40 | 0.34 | 0.83 |
| YLR163C     | MAS1        | 2957 | 2243 | 1.32 | 0.40 | 0.34 | 0.83 |
| YOR271C     |             | 1222 | 927  | 1.32 | 0.40 | 0.34 | 0.83 |
| YLR295C     | ATP14       | 1103 | 837  | 1.32 | 0.40 | 0.34 | 0.83 |
| YBR143C     | SUP45       | 2819 | 2139 | 1.32 | 0.40 | 0.34 | 0.83 |
| YKR059W     | TIF1        | 3836 | 2911 | 1.32 | 0.40 | 0.34 | 0.83 |
| YLR415C     |             | 538  | 408  | 1.32 | 0.40 | 0.34 | 0.83 |
| YOR345C     |             | 523  | 397  | 1.32 | 0.40 | 0.34 | 0.83 |
| YLR342W     | FKS1        | 2499 | 1897 | 1.32 | 0.40 | 0.34 | 0.82 |
| YHL049C     |             | 3492 | 2651 | 1.32 | 0.40 | 0.34 | 0.82 |
| YGL198W     |             | 436  | 331  | 1.32 | 0.40 | 0.34 | 0.82 |
| YKL073W     | LHS1        | 602  | 457  | 1.32 | 0.40 | 0.34 | 0.82 |
| YNL138W     | SRV2        | 1268 | 963  | 1.32 | 0.40 | 0.34 | 0.82 |
| YBR117C     | TKL2        | 1526 | 1159 | 1.32 | 0.40 | 0.34 | 0.82 |
| YGR281W     | YOR1        | 2347 | 1783 | 1.32 | 0.40 | 0.34 | 0.82 |
| YIL151C     |             | 728  | 553  | 1.32 | 0.40 | 0.34 | 0.82 |
| YMR324C     |             | 2296 | 1745 | 1.32 | 0.40 | 0.34 | 0.82 |
| YJL123C     |             | 4916 | 3737 | 1.32 | 0.40 | 0.34 | 0.82 |
| YHL023C     |             | 2791 | 2122 | 1.32 | 0.40 | 0.34 | 0.82 |
| YHR119W     | SET1        | 1327 | 1009 | 1.32 | 0.40 | 0.34 | 0.82 |
| YBL100C     |             | 5208 | 3961 | 1.31 | 0.39 | 0.34 | 0.82 |
| YBR261C     |             | 3473 | 2642 | 1.31 | 0.39 | 0.34 | 0.82 |
| YBR254C     | TRS20       | 8504 | 6472 | 1.31 | 0.39 | 0.34 | 0.82 |
| YKL070W     |             | 1281 | 975  | 1.31 | 0.39 | 0.34 | 0.82 |
| YGR176W     |             | 4107 | 3127 | 1.31 | 0.39 | 0.34 | 0.81 |
| YDL111C     | RRP42       | 1865 | 1420 | 1.31 | 0.39 | 0.34 | 0.81 |
| YLR453C     | RIF2        | 1685 | 1284 | 1.31 | 0.39 | 0.34 | 0.81 |
| YDRWdelta30 | YDRWdelta30 | 407  | 310  | 1.31 | 0.39 | 0.34 | 0.81 |
| YLR076C     |             | 1643 | 1252 | 1.31 | 0.39 | 0.34 | 0.81 |
| YDR327W     |             | 518  | 395  | 1.31 | 0.39 | 0.34 | 0.81 |

|         |        |      |      |      |      |      |      |
|---------|--------|------|------|------|------|------|------|
| YPL237W | SUI3   | 4291 | 3272 | 1.31 | 0.39 | 0.34 | 0.81 |
| YNL182C |        | 947  | 722  | 1.31 | 0.39 | 0.34 | 0.81 |
| YKL151C |        | 821  | 626  | 1.31 | 0.39 | 0.34 | 0.81 |
| YPL243W | SRP68  | 2259 | 1723 | 1.31 | 0.39 | 0.33 | 0.81 |
| YLR152C |        | 1012 | 772  | 1.31 | 0.39 | 0.33 | 0.81 |
| YHR205W | SCH9   | 1460 | 1114 | 1.31 | 0.39 | 0.33 | 0.81 |
| YPR169W |        | 2200 | 1679 | 1.31 | 0.39 | 0.33 | 0.81 |
| YPR184W |        | 1827 | 1395 | 1.31 | 0.39 | 0.33 | 0.80 |
| YJR115W |        | 707  | 540  | 1.31 | 0.39 | 0.33 | 0.80 |
| YNL030W | HHF2   | 2057 | 1571 | 1.31 | 0.39 | 0.33 | 0.80 |
| YHR216W | PUR5   | 5551 | 4239 | 1.31 | 0.39 | 0.33 | 0.80 |
| YER049W |        | 6556 | 5007 | 1.31 | 0.39 | 0.33 | 0.80 |
| YNL166C | BNI5   | 999  | 763  | 1.31 | 0.39 | 0.33 | 0.80 |
| YHR070W |        | 2229 | 1703 | 1.31 | 0.39 | 0.33 | 0.80 |
| YOL073C |        | 2721 | 2079 | 1.31 | 0.39 | 0.33 | 0.80 |
| YLR234W | TOP3   | 1751 | 1338 | 1.31 | 0.39 | 0.33 | 0.80 |
| YFR009W | GCN20  | 3005 | 2297 | 1.31 | 0.39 | 0.33 | 0.80 |
| YDL039C |        | 1494 | 1143 | 1.31 | 0.39 | 0.33 | 0.80 |
| YPR084W |        | 1781 | 1363 | 1.31 | 0.39 | 0.33 | 0.80 |
| YNL058C |        | 759  | 581  | 1.31 | 0.39 | 0.33 | 0.80 |
| YNL242W |        | 966  | 740  | 1.31 | 0.38 | 0.33 | 0.79 |
| YJL096W | MRPL49 | 433  | 332  | 1.31 | 0.38 | 0.33 | 0.79 |
| YPL107W |        | 634  | 486  | 1.31 | 0.38 | 0.33 | 0.79 |
| YLR350W |        | 4306 | 3299 | 1.31 | 0.38 | 0.33 | 0.79 |
| YLR015W |        | 1913 | 1466 | 1.31 | 0.38 | 0.33 | 0.79 |
| YDL104C | QRI7   | 5640 | 4322 | 1.30 | 0.38 | 0.33 | 0.79 |
| YOR136W | IDH2   | 1646 | 1261 | 1.30 | 0.38 | 0.33 | 0.79 |
| YOR111W |        | 1026 | 786  | 1.30 | 0.38 | 0.33 | 0.79 |
| YDL160C | DHH1   | 3482 | 2669 | 1.30 | 0.38 | 0.33 | 0.79 |
| YCR100C |        | 1870 | 1433 | 1.30 | 0.38 | 0.33 | 0.79 |
| YLR339C |        | 2158 | 1654 | 1.30 | 0.38 | 0.33 | 0.79 |
| YOR006C |        | 3120 | 2392 | 1.30 | 0.38 | 0.33 | 0.79 |
| YAL040C | CLN3   | 5638 | 4323 | 1.30 | 0.38 | 0.33 | 0.79 |
| YBR080C | SEC18  | 5001 | 3836 | 1.30 | 0.38 | 0.33 | 0.79 |
| YER103W | SSA4   | 2571 | 1972 | 1.30 | 0.38 | 0.33 | 0.79 |
| YOR369C | RPS12  | 2862 | 2196 | 1.30 | 0.38 | 0.33 | 0.79 |



|           |       |      |      |      |      |      |      |
|-----------|-------|------|------|------|------|------|------|
| YNL025C   | SSN8  | 3342 | 2564 | 1.30 | 0.38 | 0.33 | 0.79 |
| YHR035W   |       | 2080 | 1596 | 1.30 | 0.38 | 0.33 | 0.79 |
| YHR176W   |       | 769  | 590  | 1.30 | 0.38 | 0.33 | 0.79 |
| YKL190W   | CNB1  | 718  | 551  | 1.30 | 0.38 | 0.33 | 0.79 |
| YKR084C   | HBS1  | 1321 | 1014 | 1.30 | 0.38 | 0.33 | 0.79 |
| YOR327C   | SNC2  | 858  | 659  | 1.30 | 0.38 | 0.33 | 0.79 |
| YGR165W   |       | 3194 | 2452 | 1.30 | 0.38 | 0.33 | 0.79 |
| YHL019C   | APM2  | 1116 | 857  | 1.30 | 0.38 | 0.33 | 0.79 |
| YGR007W   | MUQ1  | 1499 | 1151 | 1.30 | 0.38 | 0.33 | 0.78 |
| YJR091C   | JSN1  | 898  | 690  | 1.30 | 0.38 | 0.32 | 0.78 |
| YGR058W   |       | 432  | 332  | 1.30 | 0.38 | 0.32 | 0.78 |
| YPL006W   | NCR1  | 4670 | 3588 | 1.30 | 0.38 | 0.32 | 0.78 |
| YCR075C   | ERS1  | 1007 | 774  | 1.30 | 0.38 | 0.32 | 0.78 |
| YLR373C   |       | 1426 | 1096 | 1.30 | 0.38 | 0.32 | 0.78 |
| YLR423C   |       | 739  | 568  | 1.30 | 0.38 | 0.32 | 0.78 |
| YGL002W   | ERP6  | 1271 | 978  | 1.30 | 0.38 | 0.32 | 0.78 |
| YCL064C   | CHA1  | 2440 | 1877 | 1.30 | 0.38 | 0.32 | 0.78 |
| YHR024C   | MAS2  | 2171 | 1671 | 1.30 | 0.38 | 0.32 | 0.78 |
| YBR139W   |       | 3019 | 2324 | 1.30 | 0.38 | 0.32 | 0.78 |
| YDL146W   |       | 1681 | 1294 | 1.30 | 0.38 | 0.32 | 0.78 |
| YDR430C   |       | 3616 | 2784 | 1.30 | 0.38 | 0.32 | 0.78 |
| YGR219W   |       | 987  | 760  | 1.30 | 0.38 | 0.32 | 0.77 |
| YHL011C   | PRS3  | 2816 | 2170 | 1.30 | 0.38 | 0.32 | 0.77 |
| YBL081W   |       | 4664 | 3594 | 1.30 | 0.38 | 0.32 | 0.77 |
| YDR364C   | CDC40 | 363  | 280  | 1.30 | 0.38 | 0.32 | 0.77 |
| YGR246C   | BRF1  | 1562 | 1204 | 1.30 | 0.38 | 0.32 | 0.77 |
| YMR086C-A |       | 528  | 407  | 1.30 | 0.38 | 0.32 | 0.77 |
| YMR192W   |       | 804  | 620  | 1.30 | 0.37 | 0.32 | 0.77 |
| YML012W   | ERV25 | 4416 | 3406 | 1.30 | 0.37 | 0.32 | 0.77 |
| YOR233W   | KIN4  | 2064 | 1593 | 1.30 | 0.37 | 0.32 | 0.77 |
| YOL090W   | MSH2  | 2138 | 1650 | 1.30 | 0.37 | 0.32 | 0.77 |
| YKL106W   | AAT1  | 1385 | 1069 | 1.30 | 0.37 | 0.32 | 0.77 |
| YPL002C   | SNF8  | 745  | 575  | 1.30 | 0.37 | 0.32 | 0.77 |
| YBR196C   | PGI1  | 7694 | 5941 | 1.30 | 0.37 | 0.32 | 0.77 |
| YER034W   |       | 1700 | 1313 | 1.29 | 0.37 | 0.32 | 0.76 |
| YHR130C   |       | 2223 | 1717 | 1.29 | 0.37 | 0.32 | 0.76 |

|         |        |      |      |      |      |      |      |
|---------|--------|------|------|------|------|------|------|
| YLR451W | LEU3   | 2113 | 1632 | 1.29 | 0.37 | 0.32 | 0.76 |
| YMR251W |        | 1834 | 1417 | 1.29 | 0.37 | 0.32 | 0.76 |
| YKL200C |        | 678  | 524  | 1.29 | 0.37 | 0.32 | 0.76 |
| YGL105W | ARC1   | 2985 | 2307 | 1.29 | 0.37 | 0.32 | 0.76 |
| YGR180C | RNR4   | 6876 | 5315 | 1.29 | 0.37 | 0.32 | 0.76 |
| YKL077W |        | 1833 | 1417 | 1.29 | 0.37 | 0.32 | 0.76 |
| YDR037W | KRS1   | 1706 | 1319 | 1.29 | 0.37 | 0.32 | 0.76 |
| YNR030W | ECM39  | 2218 | 1715 | 1.29 | 0.37 | 0.32 | 0.76 |
| YLR248W | RCK2   | 3429 | 2652 | 1.29 | 0.37 | 0.31 | 0.76 |
| YFL002C | SPB4   | 1624 | 1256 | 1.29 | 0.37 | 0.31 | 0.76 |
| YJR036C |        | 517  | 400  | 1.29 | 0.37 | 0.31 | 0.76 |
| YGL213C | SKI8   | 2918 | 2258 | 1.29 | 0.37 | 0.31 | 0.76 |
| YLR109W | AHP1   | 866  | 670  | 1.29 | 0.37 | 0.31 | 0.76 |
| YMR080C | NAM7   | 3582 | 2772 | 1.29 | 0.37 | 0.31 | 0.76 |
| YCR044C |        | 1524 | 1180 | 1.29 | 0.37 | 0.31 | 0.76 |
| YNL301C | RPL18B | 3694 | 2861 | 1.29 | 0.37 | 0.31 | 0.76 |
| YFL053W | DAK2   | 1056 | 818  | 1.29 | 0.37 | 0.31 | 0.75 |
| YIRO34C | LYS1   | 2412 | 1869 | 1.29 | 0.37 | 0.31 | 0.75 |
| YBL066C | SEF1   | 4047 | 3136 | 1.29 | 0.37 | 0.31 | 0.75 |
| YFR035C |        | 3737 | 2896 | 1.29 | 0.37 | 0.31 | 0.75 |
| YMR083W | ADH3   | 1438 | 1115 | 1.29 | 0.37 | 0.31 | 0.75 |
| YJL163C |        | 5283 | 4095 | 1.29 | 0.37 | 0.31 | 0.75 |
| YGR049W | SCM4   | 1784 | 1383 | 1.29 | 0.37 | 0.31 | 0.75 |
| YOL005C | RPB11  | 539  | 418  | 1.29 | 0.37 | 0.31 | 0.75 |
| YIL034C | CAP2   | 3277 | 2543 | 1.29 | 0.37 | 0.31 | 0.75 |
| YLR347C | KAP95  | 3039 | 2359 | 1.29 | 0.37 | 0.31 | 0.75 |
| YOR095C | RKI1   | 931  | 723  | 1.29 | 0.37 | 0.31 | 0.75 |
| YJR062C | NTA1   | 1053 | 818  | 1.29 | 0.36 | 0.31 | 0.75 |
| YNL272C | SEC2   | 1744 | 1354 | 1.29 | 0.36 | 0.31 | 0.75 |
| YBR031W | RPL4A  | 2779 | 2158 | 1.29 | 0.36 | 0.31 | 0.75 |
| YPR025C | CCL1   | 894  | 694  | 1.29 | 0.36 | 0.31 | 0.75 |
| YNL292W | PUS4   | 1302 | 1011 | 1.29 | 0.36 | 0.31 | 0.74 |
| YKL021C | MAK11  | 2147 | 1668 | 1.29 | 0.36 | 0.31 | 0.74 |
| YDR417C |        | 1190 | 925  | 1.29 | 0.36 | 0.31 | 0.74 |
| YOR195W | SLK19  | 3224 | 2506 | 1.29 | 0.36 | 0.31 | 0.74 |
| YOR056C |        | 1449 | 1127 | 1.29 | 0.36 | 0.31 | 0.74 |

|          |          |       |      |      |      |      |      |
|----------|----------|-------|------|------|------|------|------|
| YCLX10C  |          | 1089  | 847  | 1.29 | 0.36 | 0.31 | 0.74 |
| YML068W  |          | 463   | 360  | 1.28 | 0.36 | 0.31 | 0.74 |
| YJR068W  | RFC2     | 799   | 622  | 1.28 | 0.36 | 0.31 | 0.74 |
| YKL207W  |          | 2180  | 1697 | 1.28 | 0.36 | 0.30 | 0.74 |
| YNL306W  |          | 890   | 693  | 1.28 | 0.36 | 0.30 | 0.74 |
| YLR242C  | ARV1     | 639   | 498  | 1.28 | 0.36 | 0.30 | 0.73 |
| YNL312W  | RFA2     | 535   | 417  | 1.28 | 0.36 | 0.30 | 0.73 |
| YNL175C  |          | 1343  | 1047 | 1.28 | 0.36 | 0.30 | 0.73 |
| YDR143C  | SAN1     | 3145  | 2452 | 1.28 | 0.36 | 0.30 | 0.73 |
| YFL065C  |          | 1413  | 1102 | 1.28 | 0.36 | 0.30 | 0.73 |
| YBR110W  | ALG1     | 3220  | 2511 | 1.28 | 0.36 | 0.30 | 0.73 |
| YNL109W  |          | 1371  | 1069 | 1.28 | 0.36 | 0.30 | 0.73 |
| YGL050W  |          | 895   | 698  | 1.28 | 0.36 | 0.30 | 0.73 |
| YOR003W  | YSP3     | 1688  | 1317 | 1.28 | 0.36 | 0.30 | 0.73 |
| YBR081C  | SPT7     | 2967  | 2315 | 1.28 | 0.36 | 0.30 | 0.73 |
| YDL055C  | PSA1     | 4198  | 3276 | 1.28 | 0.36 | 0.30 | 0.73 |
| YNR051C  |          | 6204  | 4842 | 1.28 | 0.36 | 0.30 | 0.73 |
| YHL047C  |          | 2160  | 1686 | 1.28 | 0.36 | 0.30 | 0.73 |
| YCR016W  |          | 4544  | 3548 | 1.28 | 0.36 | 0.30 | 0.73 |
| YGLWtau2 | YGLWtau2 | 488   | 381  | 1.28 | 0.36 | 0.30 | 0.73 |
| YNL189W  | SRP1     | 844   | 659  | 1.28 | 0.36 | 0.30 | 0.73 |
| YHR080C  |          | 10383 | 8114 | 1.28 | 0.36 | 0.30 | 0.72 |
| YMR202W  | ERG2     | 3221  | 2517 | 1.28 | 0.36 | 0.30 | 0.72 |
| YDL030W  | PRP9     | 3123  | 2441 | 1.28 | 0.36 | 0.30 | 0.72 |
| YER122C  | GLO3     | 1857  | 1452 | 1.28 | 0.36 | 0.30 | 0.72 |
| YOR284W  |          | 659   | 515  | 1.28 | 0.36 | 0.30 | 0.72 |
| YGL253W  | HXK2     | 3751  | 2933 | 1.28 | 0.35 | 0.30 | 0.72 |
| YCR065W  | HCM1     | 7301  | 5709 | 1.28 | 0.35 | 0.30 | 0.72 |
| YNL037C  | IDH1     | 1349  | 1055 | 1.28 | 0.35 | 0.30 | 0.72 |
| YKR077W  |          | 1401  | 1096 | 1.28 | 0.35 | 0.30 | 0.72 |
| YPL181W  |          | 1501  | 1175 | 1.28 | 0.35 | 0.30 | 0.72 |
| YAL017W  | FUN31    | 2858  | 2238 | 1.28 | 0.35 | 0.30 | 0.72 |
| YIL153W  | RRD1     | 469   | 367  | 1.28 | 0.35 | 0.30 | 0.72 |
| YDL027C  |          | 1269  | 994  | 1.28 | 0.35 | 0.30 | 0.72 |
| YKL017C  | HCS1     | 924   | 724  | 1.28 | 0.35 | 0.30 | 0.71 |
| YNL294C  |          | 1531  | 1200 | 1.28 | 0.35 | 0.29 | 0.71 |

|            |            |       |       |      |      |      |      |
|------------|------------|-------|-------|------|------|------|------|
| YNL203C    |            | 2655  | 2082  | 1.28 | 0.35 | 0.29 | 0.71 |
| YOL006C    | TOP1       | 1922  | 1507  | 1.28 | 0.35 | 0.29 | 0.71 |
| YDL144C    |            | 1277  | 1002  | 1.27 | 0.35 | 0.29 | 0.71 |
| YGR123C    | PPT1       | 1816  | 1425  | 1.27 | 0.35 | 0.29 | 0.71 |
| YKL184W    | SPE1       | 633   | 497   | 1.27 | 0.35 | 0.29 | 0.71 |
| YPLCTy4-1B | YPLCTy4-1B | 951   | 746   | 1.27 | 0.35 | 0.29 | 0.71 |
| YNR053C    |            | 3233  | 2538  | 1.27 | 0.35 | 0.29 | 0.71 |
| YDL182W    | LYS20      | 2698  | 2118  | 1.27 | 0.35 | 0.29 | 0.71 |
| YAR075W    |            | 5864  | 4605  | 1.27 | 0.35 | 0.29 | 0.71 |
| YLL058W    |            | 1360  | 1068  | 1.27 | 0.35 | 0.29 | 0.71 |
| YJR140C    | HIR3       | 1511  | 1187  | 1.27 | 0.35 | 0.29 | 0.71 |
| YFL066C    |            | 6253  | 4912  | 1.27 | 0.35 | 0.29 | 0.71 |
| YDR091C    | RLI1       | 2815  | 2213  | 1.27 | 0.35 | 0.29 | 0.70 |
| YHL003C    | LAG1       | 1483  | 1166  | 1.27 | 0.35 | 0.29 | 0.70 |
| YER123W    | YCK3       | 1662  | 1307  | 1.27 | 0.35 | 0.29 | 0.70 |
| YOR270C    | VPH1       | 1867  | 1469  | 1.27 | 0.35 | 0.29 | 0.70 |
| YGR101W    |            | 1765  | 1389  | 1.27 | 0.35 | 0.29 | 0.70 |
| YBR083W    | TEC1       | 2563  | 2017  | 1.27 | 0.35 | 0.29 | 0.70 |
| YBR037C    | SCO1       | 467   | 368   | 1.27 | 0.34 | 0.29 | 0.70 |
| YPL045W    | VPS16      | 2729  | 2149  | 1.27 | 0.34 | 0.29 | 0.70 |
| YAL045C    |            | 13302 | 10475 | 1.27 | 0.34 | 0.29 | 0.70 |
| YML058C-A  |            | 1902  | 1498  | 1.27 | 0.34 | 0.29 | 0.70 |
| YPRO04C    |            | 443   | 349   | 1.27 | 0.34 | 0.29 | 0.70 |
| YJR045C    | SSC1       | 2296  | 1808  | 1.27 | 0.34 | 0.29 | 0.70 |
| YGR254W    | ENO1       | 7214  | 5682  | 1.27 | 0.34 | 0.29 | 0.70 |
| YDR017C    | KCS1       | 741   | 584   | 1.27 | 0.34 | 0.29 | 0.69 |
| YER129W    | PAK1       | 2548  | 2008  | 1.27 | 0.34 | 0.29 | 0.69 |
| YIL128W    | MET18      | 4883  | 3851  | 1.27 | 0.34 | 0.29 | 0.69 |
| YPRO80W    | TEF1       | 12903 | 10176 | 1.27 | 0.34 | 0.29 | 0.69 |
| YMR021C    | MAC1       | 1212  | 956   | 1.27 | 0.34 | 0.29 | 0.69 |
| YLR441C    | RPS1A      | 1907  | 1505  | 1.27 | 0.34 | 0.29 | 0.69 |
| YMR110C    |            | 1832  | 1446  | 1.27 | 0.34 | 0.29 | 0.69 |
| YLL048C    | YBT1       | 2025  | 1598  | 1.27 | 0.34 | 0.29 | 0.69 |
| YGR199W    | PMT6       | 1872  | 1478  | 1.27 | 0.34 | 0.28 | 0.69 |
| YDR403W    | DIT1       | 441   | 348   | 1.27 | 0.34 | 0.28 | 0.69 |
| YDR096W    | GIS1       | 855   | 675   | 1.27 | 0.34 | 0.28 | 0.69 |

|           |        |       |      |      |      |      |      |
|-----------|--------|-------|------|------|------|------|------|
| YDR350C   | TCM10  | 1636  | 1292 | 1.27 | 0.34 | 0.28 | 0.69 |
| YAL013W   | DEP1   | 1058  | 836  | 1.27 | 0.34 | 0.28 | 0.69 |
| YDR233C   |        | 2339  | 1848 | 1.27 | 0.34 | 0.28 | 0.69 |
| YBR118W   | TEF2   | 10985 | 8678 | 1.27 | 0.34 | 0.28 | 0.69 |
| YDR382W   | RPP2B  | 2332  | 1843 | 1.27 | 0.34 | 0.28 | 0.68 |
| YMR093W   |        | 1603  | 1267 | 1.27 | 0.34 | 0.28 | 0.68 |
| YNR073C   |        | 366   | 289  | 1.27 | 0.34 | 0.28 | 0.68 |
| YBR265W   | TSC10  | 1931  | 1527 | 1.26 | 0.34 | 0.28 | 0.68 |
| YOL044W   | PEX15  | 599   | 474  | 1.26 | 0.34 | 0.28 | 0.68 |
| YPL204W   | HRR25  | 5824  | 4606 | 1.26 | 0.34 | 0.28 | 0.68 |
| YOL070C   |        | 3159  | 2499 | 1.26 | 0.34 | 0.28 | 0.68 |
| YIL156W   | UBP7   | 1552  | 1228 | 1.26 | 0.34 | 0.28 | 0.68 |
| YDR411C   |        | 662   | 524  | 1.26 | 0.34 | 0.28 | 0.68 |
| YDR410C   | STE14  | 2189  | 1732 | 1.26 | 0.34 | 0.28 | 0.68 |
| YPL099C   |        | 980   | 775  | 1.26 | 0.34 | 0.28 | 0.68 |
| YLR435W   |        | 1244  | 984  | 1.26 | 0.34 | 0.28 | 0.68 |
| YOL120C   | RPL18A | 4012  | 3175 | 1.26 | 0.34 | 0.28 | 0.68 |
| YLR259C   | HSP60  | 3595  | 2846 | 1.26 | 0.34 | 0.28 | 0.68 |
| YML041C   |        | 2141  | 1695 | 1.26 | 0.34 | 0.28 | 0.68 |
| YBR238C   |        | 1848  | 1463 | 1.26 | 0.34 | 0.28 | 0.68 |
| YPL139C   | UME1   | 1267  | 1003 | 1.26 | 0.34 | 0.28 | 0.68 |
| YER178W   | PDA1   | 3631  | 2877 | 1.26 | 0.34 | 0.28 | 0.68 |
| YGR272C   |        | 2257  | 1789 | 1.26 | 0.34 | 0.28 | 0.67 |
| YBR176W   | ECM31  | 1120  | 888  | 1.26 | 0.33 | 0.28 | 0.67 |
| YLR274W   | CDC46  | 1030  | 817  | 1.26 | 0.33 | 0.28 | 0.67 |
| YML020W   |        | 6052  | 4799 | 1.26 | 0.33 | 0.28 | 0.67 |
| YPL145C   | KES1   | 2163  | 1715 | 1.26 | 0.33 | 0.28 | 0.67 |
| YHL045W   |        | 1018  | 808  | 1.26 | 0.33 | 0.28 | 0.67 |
| YML118W   |        | 929   | 737  | 1.26 | 0.33 | 0.28 | 0.67 |
| YPL197C   |        | 1890  | 1500 | 1.26 | 0.33 | 0.28 | 0.67 |
| YPL133C   |        | 683   | 542  | 1.26 | 0.33 | 0.28 | 0.67 |
| YPL279C   |        | 1090  | 865  | 1.26 | 0.33 | 0.28 | 0.67 |
| YMR316C-B |        | 2089  | 1658 | 1.26 | 0.33 | 0.28 | 0.67 |
| YMR189W   | GCV2   | 1564  | 1242 | 1.26 | 0.33 | 0.28 | 0.67 |
| YDR269C   |        | 501   | 398  | 1.26 | 0.33 | 0.28 | 0.67 |
| YKL101W   | HSL1   | 3393  | 2695 | 1.26 | 0.33 | 0.28 | 0.67 |

|           |       |      |      |      |      |      |      |
|-----------|-------|------|------|------|------|------|------|
| YMR036C   | MIH1  | 540  | 429  | 1.26 | 0.33 | 0.28 | 0.67 |
| YJL002C   | OST1  | 2778 | 2207 | 1.26 | 0.33 | 0.28 | 0.67 |
| YJL174W   | KRE9  | 2596 | 2063 | 1.26 | 0.33 | 0.28 | 0.67 |
| YJL143W   | TIM17 | 1895 | 1506 | 1.26 | 0.33 | 0.28 | 0.66 |
| YML113W   | DAT1  | 676  | 537  | 1.26 | 0.33 | 0.28 | 0.66 |
| YJR074W   | MOG1  | 1127 | 896  | 1.26 | 0.33 | 0.28 | 0.66 |
| YKL145W   | RPT1  | 4381 | 3482 | 1.26 | 0.33 | 0.28 | 0.66 |
| YOR063W   | RPL3  | 2809 | 2233 | 1.26 | 0.33 | 0.28 | 0.66 |
| YGR151C   |       | 940  | 747  | 1.26 | 0.33 | 0.27 | 0.66 |
| YMR288W   |       | 1589 | 1263 | 1.26 | 0.33 | 0.27 | 0.66 |
| YHR060W   | VMA22 | 716  | 569  | 1.26 | 0.33 | 0.27 | 0.66 |
| YBR049C   | REB1  | 1988 | 1581 | 1.26 | 0.33 | 0.27 | 0.66 |
| YKL213C   | DOA1  | 3336 | 2654 | 1.26 | 0.33 | 0.27 | 0.66 |
| YDL147W   | RPN5  | 8431 | 6709 | 1.26 | 0.33 | 0.27 | 0.66 |
| YFL034W   |       | 2465 | 1962 | 1.26 | 0.33 | 0.27 | 0.66 |
| YGL003C   | CDH1  | 2517 | 2004 | 1.26 | 0.33 | 0.27 | 0.66 |
| YNR050C   | LYS9  | 1253 | 998  | 1.26 | 0.33 | 0.27 | 0.66 |
| YNL274C   |       | 511  | 407  | 1.26 | 0.33 | 0.27 | 0.66 |
| YGL147C   | RPL9A | 5851 | 4661 | 1.26 | 0.33 | 0.27 | 0.66 |
| YDL117W   |       | 2275 | 1813 | 1.25 | 0.33 | 0.27 | 0.66 |
| YAR066W   |       | 2789 | 2224 | 1.25 | 0.33 | 0.27 | 0.65 |
| YEL059C-A | SOM1  | 565  | 451  | 1.25 | 0.33 | 0.27 | 0.65 |
| YCL044C   |       | 3114 | 2484 | 1.25 | 0.33 | 0.27 | 0.65 |
| YGR257C   |       | 1391 | 1110 | 1.25 | 0.33 | 0.27 | 0.65 |
| YBL023C   | MCM2  | 1689 | 1348 | 1.25 | 0.33 | 0.27 | 0.65 |
| YNL280C   | ERG24 | 1187 | 947  | 1.25 | 0.33 | 0.27 | 0.65 |
| YOL130W   | ALR1  | 2091 | 1669 | 1.25 | 0.33 | 0.27 | 0.65 |
| YGR004W   |       | 4882 | 3897 | 1.25 | 0.33 | 0.27 | 0.65 |
| YDL087C   | LUC7  | 1457 | 1163 | 1.25 | 0.32 | 0.27 | 0.65 |
| YHR209W   |       | 2954 | 2359 | 1.25 | 0.32 | 0.27 | 0.65 |
| YKL081W   | TEF4  | 2559 | 2043 | 1.25 | 0.32 | 0.27 | 0.65 |
| YFR007W   |       | 918  | 733  | 1.25 | 0.32 | 0.27 | 0.65 |
| YFR013W   |       | 2548 | 2035 | 1.25 | 0.32 | 0.27 | 0.65 |
| YPR014C   |       | 1384 | 1106 | 1.25 | 0.32 | 0.27 | 0.65 |
| YJL055W   |       | 1960 | 1567 | 1.25 | 0.32 | 0.27 | 0.64 |
| YJR076C   | CDC11 | 988  | 790  | 1.25 | 0.32 | 0.27 | 0.64 |

|            |            |      |      |      |      |      |      |
|------------|------------|------|------|------|------|------|------|
| YLR455W    |            | 2770 | 2216 | 1.25 | 0.32 | 0.27 | 0.64 |
| YPL057C    | SUR1       | 2583 | 2066 | 1.25 | 0.32 | 0.27 | 0.64 |
| YOR204W    | DED1       | 3979 | 3183 | 1.25 | 0.32 | 0.27 | 0.64 |
| YKR106W    |            | 1509 | 1207 | 1.25 | 0.32 | 0.27 | 0.64 |
| YGL011C    | SCL1       | 2287 | 1830 | 1.25 | 0.32 | 0.27 | 0.64 |
| YDL053C    |            | 1979 | 1583 | 1.25 | 0.32 | 0.27 | 0.64 |
| YGR005C    | TFG2       | 975  | 780  | 1.25 | 0.32 | 0.27 | 0.64 |
| YHR105W    |            | 1053 | 843  | 1.25 | 0.32 | 0.27 | 0.64 |
| YIR002C    | MPH1       | 2987 | 2391 | 1.25 | 0.32 | 0.27 | 0.64 |
| YLR004C    |            | 1070 | 857  | 1.25 | 0.32 | 0.26 | 0.64 |
| YHR026W    | PPA1       | 1813 | 1452 | 1.25 | 0.32 | 0.26 | 0.64 |
| YFL006W    |            | 648  | 519  | 1.25 | 0.32 | 0.26 | 0.64 |
| YKL029C    | MAE1       | 3687 | 2954 | 1.25 | 0.32 | 0.26 | 0.64 |
| YBR113W    |            | 2839 | 2275 | 1.25 | 0.32 | 0.26 | 0.64 |
| YCR012W    | PGK1       | 4668 | 3740 | 1.25 | 0.32 | 0.26 | 0.64 |
| YALCdelta2 | YALCdelta2 | 1027 | 823  | 1.25 | 0.32 | 0.26 | 0.64 |
| YLR060W    | FRS1       | 5158 | 4136 | 1.25 | 0.32 | 0.26 | 0.63 |
| YDL248W    | COS7       | 874  | 701  | 1.25 | 0.32 | 0.26 | 0.63 |
| YGL222C    |            | 541  | 434  | 1.25 | 0.32 | 0.26 | 0.63 |
| YGR255C    | COQ6       | 3092 | 2480 | 1.25 | 0.32 | 0.26 | 0.63 |
| YML023C    |            | 712  | 571  | 1.25 | 0.32 | 0.26 | 0.63 |
| YER048C    | CAJ1       | 1468 | 1177 | 1.25 | 0.32 | 0.26 | 0.63 |
| YOL055C    | THI20      | 1362 | 1093 | 1.25 | 0.32 | 0.26 | 0.63 |
| YKR104W    |            | 727  | 583  | 1.25 | 0.32 | 0.26 | 0.63 |
| YCL040W    | GLK1       | 2786 | 2236 | 1.25 | 0.32 | 0.26 | 0.63 |
| YGL014W    |            | 1339 | 1075 | 1.25 | 0.32 | 0.26 | 0.63 |
| YGR103W    |            | 5890 | 4728 | 1.25 | 0.32 | 0.26 | 0.63 |
| YILWTy3-1B | YILWTy3-1B | 3332 | 2677 | 1.24 | 0.32 | 0.26 | 0.63 |
| YPR035W    | GLN1       | 2714 | 2180 | 1.24 | 0.32 | 0.26 | 0.63 |
| YCL014W    | BUD3       | 1736 | 1395 | 1.24 | 0.32 | 0.26 | 0.63 |
| YMR198W    | CIK1       | 1036 | 833  | 1.24 | 0.32 | 0.26 | 0.63 |
| YIL137C    |            | 2395 | 1925 | 1.24 | 0.32 | 0.26 | 0.63 |
| YBR149W    | ARA1       | 3654 | 2938 | 1.24 | 0.31 | 0.26 | 0.62 |
| YDR068W    | DOS2       | 2986 | 2401 | 1.24 | 0.31 | 0.26 | 0.62 |
| YBR266C    |            | 4283 | 3445 | 1.24 | 0.31 | 0.26 | 0.62 |
| YJR070C    |            | 3992 | 3212 | 1.24 | 0.31 | 0.26 | 0.62 |

|         |        |      |      |      |      |      |      |
|---------|--------|------|------|------|------|------|------|
| YDR079W | PET100 | 2551 | 2053 | 1.24 | 0.31 | 0.26 | 0.62 |
| YKL162C |        | 1216 | 979  | 1.24 | 0.31 | 0.26 | 0.62 |
| YER120W | SCS2   | 5690 | 4582 | 1.24 | 0.31 | 0.26 | 0.62 |
| YKL010C | UFD4   | 3932 | 3167 | 1.24 | 0.31 | 0.26 | 0.62 |
| YJL222W | VTH2   | 3417 | 2753 | 1.24 | 0.31 | 0.26 | 0.62 |
| YOR340C | RPA43  | 2533 | 2041 | 1.24 | 0.31 | 0.26 | 0.62 |
| YGL238W | CSE1   | 3157 | 2544 | 1.24 | 0.31 | 0.26 | 0.62 |
| YER055C | HIS1   | 961  | 775  | 1.24 | 0.31 | 0.25 | 0.62 |
| YGR111W |        | 982  | 792  | 1.24 | 0.31 | 0.25 | 0.61 |
| YJR039W |        | 466  | 376  | 1.24 | 0.31 | 0.25 | 0.61 |
| YFL005W | SEC4   | 2138 | 1725 | 1.24 | 0.31 | 0.25 | 0.61 |
| YBL064C |        | 4309 | 3480 | 1.24 | 0.31 | 0.25 | 0.61 |
| YPR074C | TKL1   | 4259 | 3440 | 1.24 | 0.31 | 0.25 | 0.61 |
| YOL139C | CDC33  | 3124 | 2524 | 1.24 | 0.31 | 0.25 | 0.61 |
| YLR459W | CDC91  | 624  | 504  | 1.24 | 0.31 | 0.25 | 0.61 |
| YKR073C |        | 513  | 415  | 1.24 | 0.31 | 0.25 | 0.61 |
| YDL167C | NRP1   | 7255 | 5865 | 1.24 | 0.31 | 0.25 | 0.61 |
| YLR220W | CCC1   | 2129 | 1721 | 1.24 | 0.31 | 0.25 | 0.61 |
| YGR253C | PUP2   | 2546 | 2059 | 1.24 | 0.31 | 0.25 | 0.60 |
| YBR059C | AKL1   | 3187 | 2577 | 1.24 | 0.31 | 0.25 | 0.60 |
| YBR232C |        | 5257 | 4252 | 1.24 | 0.31 | 0.25 | 0.60 |
| YPR107C | YTH1   | 706  | 571  | 1.24 | 0.31 | 0.25 | 0.60 |
| YDR343C | HXT6   | 1178 | 953  | 1.24 | 0.31 | 0.25 | 0.60 |
| YPL261C |        | 532  | 430  | 1.24 | 0.31 | 0.25 | 0.60 |
| YNL176C |        | 2837 | 2295 | 1.24 | 0.31 | 0.25 | 0.60 |
| YOR179C |        | 777  | 629  | 1.24 | 0.31 | 0.25 | 0.60 |
| YGR149W |        | 1985 | 1606 | 1.24 | 0.31 | 0.25 | 0.60 |
| YER036C |        | 2410 | 1950 | 1.24 | 0.31 | 0.25 | 0.60 |
| YDR076W | RAD55  | 489  | 396  | 1.24 | 0.30 | 0.25 | 0.60 |
| YOR123C | LEO1   | 857  | 694  | 1.24 | 0.30 | 0.25 | 0.60 |
| YBR002C | RER2   | 3940 | 3190 | 1.24 | 0.30 | 0.25 | 0.60 |
| YAL035W | FUN12  | 4836 | 3916 | 1.23 | 0.30 | 0.25 | 0.60 |
| YOL068C | HST1   | 1614 | 1307 | 1.23 | 0.30 | 0.25 | 0.60 |
| YPR136C |        | 2173 | 1760 | 1.23 | 0.30 | 0.25 | 0.60 |
| YGL187C | COX4   | 2936 | 2378 | 1.23 | 0.30 | 0.25 | 0.60 |
| YDR033W | MRH1   | 3125 | 2531 | 1.23 | 0.30 | 0.25 | 0.60 |



|            |            |      |      |      |      |      |      |
|------------|------------|------|------|------|------|------|------|
| YJR015W    |            | 1190 | 964  | 1.23 | 0.30 | 0.25 | 0.60 |
| YGL010W    |            | 2305 | 1868 | 1.23 | 0.30 | 0.25 | 0.60 |
| YPLCTy4-1A | YPLCTy4-1A | 515  | 417  | 1.23 | 0.30 | 0.25 | 0.60 |
| YOR053W    |            | 2022 | 1639 | 1.23 | 0.30 | 0.25 | 0.60 |
| YCR072C    |            | 3084 | 2500 | 1.23 | 0.30 | 0.25 | 0.60 |
| YGR121C    | MEP1       | 2631 | 2133 | 1.23 | 0.30 | 0.25 | 0.60 |
| YJL149W    |            | 990  | 803  | 1.23 | 0.30 | 0.25 | 0.60 |
| YPL050C    | MNN9       | 5762 | 4672 | 1.23 | 0.30 | 0.25 | 0.60 |
| YNL052W    | COX5A      | 2219 | 1800 | 1.23 | 0.30 | 0.25 | 0.59 |
| YER182W    |            | 943  | 765  | 1.23 | 0.30 | 0.25 | 0.59 |
| YMR119W    |            | 1367 | 1109 | 1.23 | 0.30 | 0.25 | 0.59 |
| YGL171W    | ROK1       | 2343 | 1901 | 1.23 | 0.30 | 0.25 | 0.59 |
| YBL099W    | ATP1       | 1725 | 1400 | 1.23 | 0.30 | 0.25 | 0.59 |
| YJR030C    |            | 1043 | 846  | 1.23 | 0.30 | 0.25 | 0.59 |
| YGL023C    | PIB2       | 3135 | 2544 | 1.23 | 0.30 | 0.25 | 0.59 |
| YKRO48C    | NAP1       | 2952 | 2396 | 1.23 | 0.30 | 0.24 | 0.59 |
| YPL019C    |            | 3539 | 2873 | 1.23 | 0.30 | 0.24 | 0.59 |
| YDR253C    | MET32      | 427  | 347  | 1.23 | 0.30 | 0.24 | 0.59 |
| YPL018W    | CTF19      | 1152 | 935  | 1.23 | 0.30 | 0.24 | 0.59 |
| YNR064C    |            | 2165 | 1758 | 1.23 | 0.30 | 0.24 | 0.59 |
| YBL014C    | RRN6       | 6083 | 4940 | 1.23 | 0.30 | 0.24 | 0.59 |
| YPR055W    | SEC8       | 944  | 767  | 1.23 | 0.30 | 0.24 | 0.59 |
| YOR317W    | FAA1       | 1322 | 1074 | 1.23 | 0.30 | 0.24 | 0.59 |
| YCLX06C    |            | 2173 | 1766 | 1.23 | 0.30 | 0.24 | 0.59 |
| YNL180C    | RHO5       | 2539 | 2064 | 1.23 | 0.30 | 0.24 | 0.59 |
| YGR210C    |            | 3269 | 2658 | 1.23 | 0.30 | 0.24 | 0.59 |
| YOR032C    | HMS1       | 783  | 637  | 1.23 | 0.30 | 0.24 | 0.59 |
| YKL046C    |            | 5072 | 4125 | 1.23 | 0.30 | 0.24 | 0.58 |
| YFRO48W    |            | 1910 | 1553 | 1.23 | 0.30 | 0.24 | 0.58 |
| YIL093C    |            | 637  | 518  | 1.23 | 0.30 | 0.24 | 0.58 |
| YGL248W    | PDE1       | 1601 | 1302 | 1.23 | 0.30 | 0.24 | 0.58 |
| YDL195W    | SEC31      | 8759 | 7126 | 1.23 | 0.30 | 0.24 | 0.58 |
| YBLCsigma1 | YBLCsigma1 | 690  | 562  | 1.23 | 0.30 | 0.24 | 0.58 |
| YDL226C    | GCS1       | 2651 | 2159 | 1.23 | 0.30 | 0.24 | 0.58 |
| YML109W    | ZDS2       | 1505 | 1226 | 1.23 | 0.30 | 0.24 | 0.58 |
| YGR166W    | KRE11      | 800  | 652  | 1.23 | 0.30 | 0.24 | 0.58 |

|            |            |      |      |      |      |      |      |
|------------|------------|------|------|------|------|------|------|
| YLR165C    |            | 3009 | 2452 | 1.23 | 0.30 | 0.24 | 0.58 |
| YDL179W    | PCL9       | 2298 | 1873 | 1.23 | 0.30 | 0.24 | 0.58 |
| YNL065W    |            | 1489 | 1214 | 1.23 | 0.29 | 0.24 | 0.58 |
| YOR269W    | PAC1       | 1504 | 1226 | 1.23 | 0.29 | 0.24 | 0.58 |
| YIL022W    | TIM44      | 3763 | 3068 | 1.23 | 0.29 | 0.24 | 0.58 |
| YOLWdelta6 | YOLWdelta6 | 2448 | 1996 | 1.23 | 0.29 | 0.24 | 0.58 |
| YOR046C    | DBP5       | 3750 | 3058 | 1.23 | 0.29 | 0.24 | 0.58 |
| YLR262C    | YPT6       | 1162 | 948  | 1.23 | 0.29 | 0.24 | 0.57 |
| YBL007C    | SLA1       | 2624 | 2140 | 1.23 | 0.29 | 0.24 | 0.57 |
| YJL092W    | HPR5       | 680  | 555  | 1.23 | 0.29 | 0.24 | 0.57 |
| YDR379W    | RGA2       | 1268 | 1034 | 1.23 | 0.29 | 0.24 | 0.57 |
| YDR362C    | TFC6       | 1677 | 1368 | 1.23 | 0.29 | 0.24 | 0.57 |
| YNL319W    |            | 1096 | 894  | 1.23 | 0.29 | 0.24 | 0.57 |
| YPR118W    |            | 1297 | 1058 | 1.23 | 0.29 | 0.24 | 0.57 |
| YOR250C    | CLP1       | 401  | 327  | 1.23 | 0.29 | 0.24 | 0.57 |
| YGR096W    |            | 1809 | 1476 | 1.23 | 0.29 | 0.24 | 0.57 |
| YBR251W    | MRPS5      | 2850 | 2326 | 1.23 | 0.29 | 0.24 | 0.57 |
| YPR160W    | GPH1       | 1569 | 1281 | 1.23 | 0.29 | 0.24 | 0.57 |
| YAL067C    | SEO1       | 524  | 428  | 1.22 | 0.29 | 0.24 | 0.57 |
| YJL048C    |            | 736  | 601  | 1.22 | 0.29 | 0.24 | 0.57 |
| YHR028C    | DAP2       | 851  | 695  | 1.22 | 0.29 | 0.24 | 0.57 |
| YGR285C    | ZUO1       | 3766 | 3075 | 1.22 | 0.29 | 0.24 | 0.57 |
| YIR006C    | PAN1       | 1742 | 1423 | 1.22 | 0.29 | 0.24 | 0.57 |
| YER110C    | KAP123     | 3394 | 2772 | 1.22 | 0.29 | 0.24 | 0.57 |
| YDL137W    | ARF2       | 4826 | 3942 | 1.22 | 0.29 | 0.24 | 0.57 |
| YDR179C    |            | 662  | 541  | 1.22 | 0.29 | 0.24 | 0.57 |
| YPL090C    | RPS6A      | 5087 | 4155 | 1.22 | 0.29 | 0.24 | 0.57 |
| YBR048W    | RPS11B     | 2929 | 2393 | 1.22 | 0.29 | 0.24 | 0.57 |
| YKL087C    | CYT2       | 1356 | 1108 | 1.22 | 0.29 | 0.24 | 0.57 |
| YJL133W    | MRS3       | 808  | 660  | 1.22 | 0.29 | 0.24 | 0.57 |
| YJR042W    | NUP85      | 1616 | 1321 | 1.22 | 0.29 | 0.24 | 0.57 |
| YPL025C    |            | 700  | 572  | 1.22 | 0.29 | 0.23 | 0.57 |
| YBR024W    | SCO2       | 1406 | 1149 | 1.22 | 0.29 | 0.23 | 0.57 |
| YHR029C    |            | 1656 | 1354 | 1.22 | 0.29 | 0.23 | 0.57 |
| YCL052C    | PBN1       | 2020 | 1651 | 1.22 | 0.29 | 0.23 | 0.57 |
| YDL043C    | PRP11      | 840  | 687  | 1.22 | 0.29 | 0.23 | 0.57 |

|           |        |      |      |      |      |      |      |
|-----------|--------|------|------|------|------|------|------|
| YEL046C   | GLY1   | 1217 | 995  | 1.22 | 0.29 | 0.23 | 0.57 |
| YNL150W   |        | 1596 | 1305 | 1.22 | 0.29 | 0.23 | 0.57 |
| YOL156W   | HXT11  | 1878 | 1536 | 1.22 | 0.29 | 0.23 | 0.56 |
| YJR110W   |        | 1127 | 922  | 1.22 | 0.29 | 0.23 | 0.56 |
| YGL228W   | SHE10  | 2382 | 1949 | 1.22 | 0.29 | 0.23 | 0.56 |
| YLL026W   | HSP104 | 5982 | 4896 | 1.22 | 0.29 | 0.23 | 0.56 |
| YDL191W   | RPL35A | 2452 | 2007 | 1.22 | 0.29 | 0.23 | 0.56 |
| YLR243W   |        | 1297 | 1062 | 1.22 | 0.29 | 0.23 | 0.56 |
| YGL098W   |        | 1470 | 1204 | 1.22 | 0.29 | 0.23 | 0.56 |
| YOR001W   | RRP6   | 2513 | 2058 | 1.22 | 0.29 | 0.23 | 0.56 |
| YPR155C   | NCA2   | 889  | 728  | 1.22 | 0.29 | 0.23 | 0.56 |
| YOL089C   | HAL9   | 2536 | 2077 | 1.22 | 0.29 | 0.23 | 0.56 |
| YPL122C   | TFB2   | 2991 | 2450 | 1.22 | 0.29 | 0.23 | 0.56 |
| YMR183C   | SSO2   | 3497 | 2865 | 1.22 | 0.29 | 0.23 | 0.56 |
| YKL049C   | CSE4   | 964  | 790  | 1.22 | 0.29 | 0.23 | 0.56 |
| YDL201W   |        | 3228 | 2646 | 1.22 | 0.29 | 0.23 | 0.56 |
| YMR272C   | SCS7   | 1638 | 1343 | 1.22 | 0.29 | 0.23 | 0.56 |
| YJL076W   | NET1   | 2787 | 2285 | 1.22 | 0.29 | 0.23 | 0.56 |
| YJR046W   | TAH11  | 832  | 682  | 1.22 | 0.29 | 0.23 | 0.56 |
| YOL144W   | NOP8   | 1055 | 865  | 1.22 | 0.29 | 0.23 | 0.56 |
| YFRO24C-A |        | 538  | 441  | 1.22 | 0.29 | 0.23 | 0.55 |
| YPR133C   |        | 361  | 296  | 1.22 | 0.29 | 0.23 | 0.55 |
| YLR014C   | PPR1   | 921  | 756  | 1.22 | 0.29 | 0.23 | 0.55 |
| YHR183W   | GND1   | 850  | 698  | 1.22 | 0.28 | 0.23 | 0.55 |
| YBL051C   |        | 2585 | 2123 | 1.22 | 0.28 | 0.23 | 0.55 |
| YIL169C   |        | 4969 | 4081 | 1.22 | 0.28 | 0.23 | 0.55 |
| YJL213W   |        | 2397 | 1969 | 1.22 | 0.28 | 0.23 | 0.55 |
| YIRO22W   | SEC11  | 666  | 547  | 1.22 | 0.28 | 0.23 | 0.55 |
| YGR054W   |        | 2226 | 1828 | 1.22 | 0.28 | 0.23 | 0.55 |
| YBR221C   | PDB1   | 5874 | 4826 | 1.22 | 0.28 | 0.23 | 0.55 |
| YGL035C   | MIG1   | 2457 | 2019 | 1.22 | 0.28 | 0.23 | 0.55 |
| YGL031C   | RPL24A | 4790 | 3937 | 1.22 | 0.28 | 0.23 | 0.55 |
| YIL091C   |        | 2537 | 2085 | 1.22 | 0.28 | 0.23 | 0.55 |
| YCL038C   |        | 2143 | 1762 | 1.22 | 0.28 | 0.23 | 0.55 |
| YMR266W   |        | 1923 | 1581 | 1.22 | 0.28 | 0.23 | 0.55 |
| YNL282W   | POP3   | 1432 | 1178 | 1.22 | 0.28 | 0.23 | 0.55 |

|         |        |      |      |      |      |      |      |
|---------|--------|------|------|------|------|------|------|
| YDR389W | SAC7   | 3789 | 3116 | 1.22 | 0.28 | 0.23 | 0.55 |
| YLR309C | IMH1   | 3521 | 2896 | 1.22 | 0.28 | 0.23 | 0.55 |
| YIL097W |        | 598  | 492  | 1.22 | 0.28 | 0.23 | 0.55 |
| YPL029W | SUV3   | 4393 | 3614 | 1.22 | 0.28 | 0.23 | 0.54 |
| YGL078C | DBP3   | 1277 | 1051 | 1.22 | 0.28 | 0.23 | 0.54 |
| YNL168C |        | 2473 | 2035 | 1.22 | 0.28 | 0.22 | 0.54 |
| YDR423C | CAD1   | 1080 | 889  | 1.21 | 0.28 | 0.22 | 0.54 |
| YAL043C | PTA1   | 1454 | 1197 | 1.21 | 0.28 | 0.22 | 0.54 |
| YDR028C | REG1   | 946  | 779  | 1.21 | 0.28 | 0.22 | 0.54 |
| YGL062W | PYC1   | 476  | 392  | 1.21 | 0.28 | 0.22 | 0.54 |
| YCRO42C | TSM1   | 2142 | 1765 | 1.21 | 0.28 | 0.22 | 0.54 |
| YNL270C | ALP1   | 1113 | 917  | 1.21 | 0.28 | 0.22 | 0.54 |
| YGR238C | KEL2   | 3159 | 2604 | 1.21 | 0.28 | 0.22 | 0.54 |
| YDL127W | PCL2   | 3162 | 2606 | 1.21 | 0.28 | 0.22 | 0.54 |
| YPL100W |        | 653  | 538  | 1.21 | 0.28 | 0.22 | 0.54 |
| YGR234W | YHB1   | 5412 | 4462 | 1.21 | 0.28 | 0.22 | 0.54 |
| YMR214W | SCJ1   | 7908 | 6520 | 1.21 | 0.28 | 0.22 | 0.54 |
| YCL008C | STP22  | 3637 | 3000 | 1.21 | 0.28 | 0.22 | 0.54 |
| YNL116W |        | 1831 | 1510 | 1.21 | 0.28 | 0.22 | 0.54 |
| YKL180W | RPL17A | 3836 | 3164 | 1.21 | 0.28 | 0.22 | 0.54 |
| YER107C | GLE2   | 1022 | 843  | 1.21 | 0.28 | 0.22 | 0.54 |
| YMR245W |        | 1154 | 952  | 1.21 | 0.28 | 0.22 | 0.53 |
| YHR039C |        | 1323 | 1092 | 1.21 | 0.28 | 0.22 | 0.53 |
| YGL091C | NBP35  | 2728 | 2251 | 1.21 | 0.28 | 0.22 | 0.53 |
| YNL314W | DAL82  | 1400 | 1155 | 1.21 | 0.28 | 0.22 | 0.53 |
| YLR154C |        | 2845 | 2349 | 1.21 | 0.28 | 0.22 | 0.53 |
| YEL025C |        | 3861 | 3188 | 1.21 | 0.28 | 0.22 | 0.53 |
| YBR203W |        | 1040 | 859  | 1.21 | 0.28 | 0.22 | 0.53 |
| YGL068W |        | 860  | 710  | 1.21 | 0.28 | 0.22 | 0.53 |
| YLR057W |        | 1317 | 1088 | 1.21 | 0.28 | 0.22 | 0.53 |
| YMR321C |        | 793  | 655  | 1.21 | 0.28 | 0.22 | 0.53 |
| YNL211C |        | 687  | 567  | 1.21 | 0.28 | 0.22 | 0.53 |
| YOL102C | TPT1   | 489  | 404  | 1.21 | 0.28 | 0.22 | 0.53 |
| YLR011W |        | 1956 | 1616 | 1.21 | 0.28 | 0.22 | 0.53 |
| YNL078W |        | 1231 | 1018 | 1.21 | 0.27 | 0.22 | 0.53 |
| YDR365C |        | 5088 | 4208 | 1.21 | 0.27 | 0.22 | 0.53 |

|         |       |      |      |      |      |      |      |
|---------|-------|------|------|------|------|------|------|
| YOR248W |       | 1629 | 1347 | 1.21 | 0.27 | 0.22 | 0.53 |
| YIR044C |       | 1623 | 1342 | 1.21 | 0.27 | 0.22 | 0.53 |
| YKR075C |       | 789  | 653  | 1.21 | 0.27 | 0.22 | 0.53 |
| YLR135W |       | 3645 | 3015 | 1.21 | 0.27 | 0.22 | 0.53 |
| YOR205C |       | 2173 | 1798 | 1.21 | 0.27 | 0.22 | 0.53 |
| YLR186W |       | 1346 | 1114 | 1.21 | 0.27 | 0.22 | 0.52 |
| YPL061W | ALD6  | 627  | 519  | 1.21 | 0.27 | 0.22 | 0.52 |
| YGL159W |       | 1187 | 982  | 1.21 | 0.27 | 0.22 | 0.52 |
| YBL097W | BRN1  | 2213 | 1832 | 1.21 | 0.27 | 0.22 | 0.52 |
| YML015C | TAF40 | 977  | 809  | 1.21 | 0.27 | 0.22 | 0.52 |
| YJR104C | SOD1  | 1440 | 1192 | 1.21 | 0.27 | 0.22 | 0.52 |
| YFL064C |       | 3789 | 3137 | 1.21 | 0.27 | 0.22 | 0.52 |
| YOL096C | COQ3  | 407  | 337  | 1.21 | 0.27 | 0.22 | 0.52 |
| YBR171W | SEC66 | 697  | 578  | 1.21 | 0.27 | 0.21 | 0.52 |
| YDR387C |       | 1363 | 1130 | 1.21 | 0.27 | 0.21 | 0.52 |
| YOR214C |       | 656  | 544  | 1.21 | 0.27 | 0.21 | 0.52 |
| YER022W | SRB4  | 1274 | 1056 | 1.21 | 0.27 | 0.21 | 0.52 |
| YNL221C | POP1  | 1587 | 1316 | 1.21 | 0.27 | 0.21 | 0.52 |
| YDR395W | SXM1  | 2527 | 2095 | 1.21 | 0.27 | 0.21 | 0.52 |
| YBL035C | POL12 | 1856 | 1541 | 1.20 | 0.27 | 0.21 | 0.51 |
| YMR262W |       | 2603 | 2162 | 1.20 | 0.27 | 0.21 | 0.51 |
| YJL129C | TRK1  | 1780 | 1479 | 1.20 | 0.27 | 0.21 | 0.51 |
| YDR110W | FOB1  | 1367 | 1136 | 1.20 | 0.27 | 0.21 | 0.51 |
| YNL111C | CYB5  | 4830 | 4015 | 1.20 | 0.27 | 0.21 | 0.51 |
| YFR044C |       | 3149 | 2618 | 1.20 | 0.27 | 0.21 | 0.51 |
| YML025C |       | 1073 | 892  | 1.20 | 0.27 | 0.21 | 0.51 |
| YLR249W | YEF3  | 5534 | 4602 | 1.20 | 0.27 | 0.21 | 0.51 |
| YFL008W | SMC1  | 2938 | 2443 | 1.20 | 0.27 | 0.21 | 0.51 |
| YOR131C |       | 516  | 429  | 1.20 | 0.27 | 0.21 | 0.51 |
| YIL011W |       | 3940 | 3277 | 1.20 | 0.27 | 0.21 | 0.51 |
| YDR279W |       | 1367 | 1137 | 1.20 | 0.27 | 0.21 | 0.51 |
| YNL254C |       | 1837 | 1528 | 1.20 | 0.27 | 0.21 | 0.51 |
| YPL226W |       | 5065 | 4214 | 1.20 | 0.27 | 0.21 | 0.51 |
| YGL190C | CDC55 | 2883 | 2399 | 1.20 | 0.27 | 0.21 | 0.50 |
| YEL014C |       | 1084 | 902  | 1.20 | 0.26 | 0.21 | 0.50 |
| YDR478W | SNM1  | 1816 | 1512 | 1.20 | 0.26 | 0.21 | 0.50 |

|           |        |      |      |      |      |      |      |
|-----------|--------|------|------|------|------|------|------|
| YMR060C   | TOM37  | 4980 | 4146 | 1.20 | 0.26 | 0.21 | 0.50 |
| YOR360C   | PDE2   | 1428 | 1189 | 1.20 | 0.26 | 0.21 | 0.50 |
| YNL013C   |        | 4389 | 3656 | 1.20 | 0.26 | 0.21 | 0.50 |
| YLR398C   | SKI2   | 4722 | 3934 | 1.20 | 0.26 | 0.21 | 0.50 |
| YKL085W   | MDH1   | 4974 | 4145 | 1.20 | 0.26 | 0.21 | 0.50 |
| YKL096W   | CWP1   | 3751 | 3126 | 1.20 | 0.26 | 0.21 | 0.50 |
| YLR304C   | ACO1   | 4544 | 3789 | 1.20 | 0.26 | 0.21 | 0.50 |
| YLR333C   | RPS25B | 1230 | 1026 | 1.20 | 0.26 | 0.21 | 0.50 |
| YGL042C   |        | 2677 | 2233 | 1.20 | 0.26 | 0.21 | 0.50 |
| YMR244C-A |        | 2360 | 1969 | 1.20 | 0.26 | 0.21 | 0.50 |
| YELO32W   | MCM3   | 2230 | 1861 | 1.20 | 0.26 | 0.21 | 0.50 |
| YJR144W   | MGM101 | 1168 | 975  | 1.20 | 0.26 | 0.21 | 0.50 |
| YJR040W   | GEF1   | 2418 | 2018 | 1.20 | 0.26 | 0.20 | 0.49 |
| YPR191W   | QCR2   | 3867 | 3228 | 1.20 | 0.26 | 0.20 | 0.49 |
| YPR113W   | PIS1   | 2498 | 2085 | 1.20 | 0.26 | 0.20 | 0.49 |
| YNL244C   | SUI1   | 448  | 374  | 1.20 | 0.26 | 0.20 | 0.49 |
| YOR349W   | CIN1   | 780  | 651  | 1.20 | 0.26 | 0.20 | 0.49 |
| YLR144C   | ACF2   | 667  | 557  | 1.20 | 0.26 | 0.20 | 0.49 |
| YFL028C   | CAF16  | 1666 | 1391 | 1.20 | 0.26 | 0.20 | 0.49 |
| YNL048W   | ALG11  | 664  | 554  | 1.20 | 0.26 | 0.20 | 0.49 |
| YJR007W   | SUI2   | 1831 | 1529 | 1.20 | 0.26 | 0.20 | 0.49 |
| YDL011C   |        | 1182 | 987  | 1.20 | 0.26 | 0.20 | 0.49 |
| YGL076C   | RPL7A  | 2578 | 2153 | 1.20 | 0.26 | 0.20 | 0.49 |
| YER142C   | MAG1   | 1068 | 892  | 1.20 | 0.26 | 0.20 | 0.49 |
| YCR104W   | PAU3   | 641  | 535  | 1.20 | 0.26 | 0.20 | 0.49 |
| YOL061W   | PRS5   | 2583 | 2158 | 1.20 | 0.26 | 0.20 | 0.49 |
| YOL140W   | ARG8   | 1940 | 1621 | 1.20 | 0.26 | 0.20 | 0.49 |
| YNL062C   | GCD10  | 1923 | 1607 | 1.20 | 0.26 | 0.20 | 0.49 |
| YIL143C   | SSL2   | 2504 | 2093 | 1.20 | 0.26 | 0.20 | 0.49 |
| YOL017W   |        | 791  | 661  | 1.20 | 0.26 | 0.20 | 0.49 |
| YOR242C   | SSP2   | 690  | 577  | 1.20 | 0.26 | 0.20 | 0.49 |
| YHR083W   |        | 3536 | 2956 | 1.20 | 0.26 | 0.20 | 0.49 |
| YLR070C   |        | 1859 | 1554 | 1.20 | 0.26 | 0.20 | 0.49 |
| YEL076C   |        | 6060 | 5067 | 1.20 | 0.26 | 0.20 | 0.49 |
| YLR399C   | BDF1   | 3421 | 2860 | 1.20 | 0.26 | 0.20 | 0.49 |
| YBR108W   |        | 5514 | 4611 | 1.20 | 0.26 | 0.20 | 0.49 |

|           |       |      |      |      |      |      |      |
|-----------|-------|------|------|------|------|------|------|
| YML037C   |       | 1451 | 1213 | 1.20 | 0.26 | 0.20 | 0.49 |
| YLR139C   | SLS1  | 1901 | 1590 | 1.20 | 0.26 | 0.20 | 0.49 |
| YCL059C   | KRR1  | 5720 | 4785 | 1.20 | 0.26 | 0.20 | 0.49 |
| YDL134C   | PPH21 | 1400 | 1171 | 1.20 | 0.26 | 0.20 | 0.49 |
| YCL011C   | GBP2  | 4536 | 3795 | 1.20 | 0.26 | 0.20 | 0.49 |
| YDR213W   |       | 3511 | 2938 | 1.20 | 0.26 | 0.20 | 0.49 |
| YOR381W   | FRE3  | 1081 | 905  | 1.19 | 0.26 | 0.20 | 0.48 |
| YNL307C   | MCK1  | 5219 | 4368 | 1.19 | 0.26 | 0.20 | 0.48 |
| YOR372C   | NDD1  | 2875 | 2406 | 1.19 | 0.26 | 0.20 | 0.48 |
| YOR133W   | EFT1  | 5537 | 4635 | 1.19 | 0.26 | 0.20 | 0.48 |
| YBR181C   | RPS6B | 6134 | 5135 | 1.19 | 0.26 | 0.20 | 0.48 |
| YEL020C   |       | 3270 | 2739 | 1.19 | 0.26 | 0.20 | 0.48 |
| YOR112W   |       | 1028 | 861  | 1.19 | 0.26 | 0.20 | 0.48 |
| YPR069C   | SPE3  | 850  | 712  | 1.19 | 0.26 | 0.20 | 0.48 |
| YOL136C   | PFK27 | 1924 | 1612 | 1.19 | 0.26 | 0.20 | 0.48 |
| YGR048W   | UFD1  | 1589 | 1331 | 1.19 | 0.26 | 0.20 | 0.48 |
| YPR164W   | KIM3  | 2839 | 2379 | 1.19 | 0.26 | 0.20 | 0.48 |
| YGL028C   | SCW11 | 2881 | 2414 | 1.19 | 0.25 | 0.20 | 0.48 |
| YDR026C   |       | 2755 | 2309 | 1.19 | 0.25 | 0.20 | 0.48 |
| YGR055W   | MUP1  | 1620 | 1358 | 1.19 | 0.25 | 0.20 | 0.48 |
| YMR314W   | PRE5  | 5485 | 4598 | 1.19 | 0.25 | 0.20 | 0.48 |
| YLR214W   | FRE1  | 5184 | 4346 | 1.19 | 0.25 | 0.20 | 0.48 |
| YJR078W   |       | 318  | 267  | 1.19 | 0.25 | 0.20 | 0.48 |
| YLR321C   | SFH1  | 1297 | 1088 | 1.19 | 0.25 | 0.20 | 0.48 |
| YDL247W   |       | 2504 | 2101 | 1.19 | 0.25 | 0.20 | 0.48 |
| YHR106W   | TRR2  | 2803 | 2352 | 1.19 | 0.25 | 0.20 | 0.48 |
| YKL038W   | RGT1  | 1202 | 1009 | 1.19 | 0.25 | 0.20 | 0.48 |
| YKL097W-A |       | 2401 | 2015 | 1.19 | 0.25 | 0.20 | 0.48 |
| YDR352W   |       | 1707 | 1433 | 1.19 | 0.25 | 0.20 | 0.47 |
| YHR008C   | SOD2  | 2147 | 1802 | 1.19 | 0.25 | 0.20 | 0.47 |
| YGL182C   |       | 1257 | 1055 | 1.19 | 0.25 | 0.20 | 0.47 |
| YKR044W   |       | 1847 | 1550 | 1.19 | 0.25 | 0.20 | 0.47 |
| YBL067C   | UBP13 | 3869 | 3248 | 1.19 | 0.25 | 0.20 | 0.47 |
| YLR023C   |       | 1299 | 1091 | 1.19 | 0.25 | 0.20 | 0.47 |
| YLR382C   | NAM2  | 1078 | 905  | 1.19 | 0.25 | 0.20 | 0.47 |
| YLL051C   | FRE6  | 2542 | 2135 | 1.19 | 0.25 | 0.20 | 0.47 |

|           |       |      |      |      |      |      |      |
|-----------|-------|------|------|------|------|------|------|
| YAL058C-A |       | 1894 | 1591 | 1.19 | 0.25 | 0.20 | 0.47 |
| YDR272W   | GLO2  | 553  | 465  | 1.19 | 0.25 | 0.19 | 0.47 |
| YOR231W   | MKK1  | 2195 | 1845 | 1.19 | 0.25 | 0.19 | 0.47 |
| YLR241W   |       | 1349 | 1134 | 1.19 | 0.25 | 0.19 | 0.47 |
| YMR320W   |       | 2697 | 2267 | 1.19 | 0.25 | 0.19 | 0.47 |
| YMR270C   | RRN9  | 805  | 677  | 1.19 | 0.25 | 0.19 | 0.47 |
| YCR094W   | CDC50 | 3870 | 3254 | 1.19 | 0.25 | 0.19 | 0.47 |
| YAL037W   |       | 2199 | 1849 | 1.19 | 0.25 | 0.19 | 0.47 |
| YJL185C   |       | 1730 | 1455 | 1.19 | 0.25 | 0.19 | 0.47 |
| YDR323C   | PEP7  | 1762 | 1482 | 1.19 | 0.25 | 0.19 | 0.47 |
| YJL061W   | NUP82 | 1756 | 1477 | 1.19 | 0.25 | 0.19 | 0.47 |
| YDL198C   | YHM1  | 2011 | 1692 | 1.19 | 0.25 | 0.19 | 0.47 |
| YOR007C   | SGT2  | 1745 | 1468 | 1.19 | 0.25 | 0.19 | 0.47 |
| YOR157C   | PUP1  | 1486 | 1250 | 1.19 | 0.25 | 0.19 | 0.47 |
| YNL014W   |       | 2195 | 1847 | 1.19 | 0.25 | 0.19 | 0.47 |
| YER170W   | ADK2  | 644  | 542  | 1.19 | 0.25 | 0.19 | 0.47 |
| YGL095C   | VPS45 | 2709 | 2280 | 1.19 | 0.25 | 0.19 | 0.46 |
| YOL128C   |       | 438  | 369  | 1.19 | 0.25 | 0.19 | 0.46 |
| YBL032W   |       | 4590 | 3865 | 1.19 | 0.25 | 0.19 | 0.46 |
| YPR033C   | HTS1  | 2356 | 1984 | 1.19 | 0.25 | 0.19 | 0.46 |
| YHL043W   | ECM34 | 860  | 724  | 1.19 | 0.25 | 0.19 | 0.46 |
| YBR192W   | RIM2  | 1585 | 1335 | 1.19 | 0.25 | 0.19 | 0.46 |
| YOR320C   |       | 1635 | 1377 | 1.19 | 0.25 | 0.19 | 0.46 |
| YJL073W   | JEM1  | 2141 | 1804 | 1.19 | 0.25 | 0.19 | 0.46 |
| YJR122W   | CAF17 | 587  | 495  | 1.19 | 0.25 | 0.19 | 0.46 |
| YER007C-A |       | 1286 | 1084 | 1.19 | 0.25 | 0.19 | 0.46 |
| YDR467C   |       | 1285 | 1083 | 1.19 | 0.25 | 0.19 | 0.46 |
| YIL176C   |       | 1803 | 1520 | 1.19 | 0.25 | 0.19 | 0.46 |
| YGL137W   | SEC27 | 5452 | 4597 | 1.19 | 0.25 | 0.19 | 0.46 |
| YDL131W   | LYS21 | 2652 | 2236 | 1.19 | 0.25 | 0.19 | 0.46 |
| YHR188C   |       | 1842 | 1553 | 1.19 | 0.25 | 0.19 | 0.46 |
| YDR399W   | HPT1  | 745  | 628  | 1.19 | 0.25 | 0.19 | 0.46 |
| YGR216C   | GPI1  | 3319 | 2799 | 1.19 | 0.25 | 0.19 | 0.46 |
| YER119C   |       | 724  | 611  | 1.19 | 0.24 | 0.19 | 0.46 |
| YMR097C   |       | 780  | 658  | 1.19 | 0.24 | 0.19 | 0.46 |
| YKRO21W   |       | 1110 | 937  | 1.18 | 0.24 | 0.19 | 0.46 |



|           |        |      |      |      |      |      |      |
|-----------|--------|------|------|------|------|------|------|
| YHR074W   |        | 719  | 607  | 1.18 | 0.24 | 0.19 | 0.46 |
| YOR290C   | SNF2   | 440  | 371  | 1.18 | 0.24 | 0.19 | 0.46 |
| YNL036W   | NCE103 | 1636 | 1381 | 1.18 | 0.24 | 0.19 | 0.45 |
| YGR033C   |        | 2055 | 1735 | 1.18 | 0.24 | 0.19 | 0.45 |
| YLR027C   | AAT2   | 3564 | 3009 | 1.18 | 0.24 | 0.19 | 0.45 |
| YCL018W   | LEU2   | 1277 | 1079 | 1.18 | 0.24 | 0.19 | 0.45 |
| YLR021W   |        | 1374 | 1161 | 1.18 | 0.24 | 0.19 | 0.45 |
| YDR132C   |        | 1309 | 1106 | 1.18 | 0.24 | 0.19 | 0.45 |
| YDL064W   | UBC9   | 2583 | 2183 | 1.18 | 0.24 | 0.19 | 0.45 |
| YBL112C   |        | 5081 | 4295 | 1.18 | 0.24 | 0.19 | 0.45 |
| YPR106W   | ISR1   | 664  | 561  | 1.18 | 0.24 | 0.19 | 0.45 |
| YNL094W   |        | 1066 | 901  | 1.18 | 0.24 | 0.19 | 0.45 |
| YLR044C   | PDC1   | 5927 | 5012 | 1.18 | 0.24 | 0.19 | 0.45 |
| YPR047W   | MSF1   | 1360 | 1150 | 1.18 | 0.24 | 0.19 | 0.45 |
| YCL043C   | PDI1   | 4610 | 3899 | 1.18 | 0.24 | 0.19 | 0.45 |
| YLR414C   |        | 400  | 338  | 1.18 | 0.24 | 0.19 | 0.45 |
| YGL112C   | TAF60  | 745  | 630  | 1.18 | 0.24 | 0.19 | 0.45 |
| YPL082C   | MOT1   | 6300 | 5331 | 1.18 | 0.24 | 0.18 | 0.45 |
| YKL161C   |        | 1030 | 872  | 1.18 | 0.24 | 0.18 | 0.45 |
| YOR207C   | RET1   | 1959 | 1658 | 1.18 | 0.24 | 0.18 | 0.45 |
| YCL063W   |        | 1567 | 1326 | 1.18 | 0.24 | 0.18 | 0.45 |
| YKL088W   |        | 1070 | 906  | 1.18 | 0.24 | 0.18 | 0.45 |
| YNL279W   |        | 865  | 732  | 1.18 | 0.24 | 0.18 | 0.44 |
| YELO41W   |        | 1242 | 1052 | 1.18 | 0.24 | 0.18 | 0.44 |
| YAR029W   |        | 1406 | 1191 | 1.18 | 0.24 | 0.18 | 0.44 |
| YAR052C   |        | 1357 | 1150 | 1.18 | 0.24 | 0.18 | 0.44 |
| YBR021W   | FUR4   | 650  | 551  | 1.18 | 0.24 | 0.18 | 0.44 |
| YML004C   | GLO1   | 2040 | 1729 | 1.18 | 0.24 | 0.18 | 0.44 |
| YNR020C   |        | 2829 | 2397 | 1.18 | 0.24 | 0.18 | 0.44 |
| YBR090C-A |        | 3241 | 2747 | 1.18 | 0.24 | 0.18 | 0.44 |
| YHR206W   | SKN7   | 1896 | 1607 | 1.18 | 0.24 | 0.18 | 0.44 |
| YDR095C   |        | 1665 | 1411 | 1.18 | 0.24 | 0.18 | 0.44 |
| YDR493W   |        | 461  | 391  | 1.18 | 0.24 | 0.18 | 0.44 |
| YDL106C   | GRF10  | 1415 | 1200 | 1.18 | 0.24 | 0.18 | 0.44 |
| YOR050C   |        | 680  | 577  | 1.18 | 0.24 | 0.18 | 0.44 |
| YOR034C   | AKR2   | 1494 | 1267 | 1.18 | 0.24 | 0.18 | 0.44 |

|         |       |      |      |      |      |      |      |
|---------|-------|------|------|------|------|------|------|
| YDR295C |       | 994  | 843  | 1.18 | 0.24 | 0.18 | 0.44 |
| YPL077C |       | 1129 | 957  | 1.18 | 0.24 | 0.18 | 0.44 |
| YKL089W | MIF2  | 928  | 787  | 1.18 | 0.24 | 0.18 | 0.44 |
| YLL013C |       | 2988 | 2536 | 1.18 | 0.24 | 0.18 | 0.44 |
| YOR344C | TYE7  | 2284 | 1938 | 1.18 | 0.24 | 0.18 | 0.44 |
| YLL052C | AQY2  | 3356 | 2849 | 1.18 | 0.24 | 0.18 | 0.44 |
| YML010W | SPT5  | 2769 | 2351 | 1.18 | 0.24 | 0.18 | 0.43 |
| YKL110C | KTI12 | 1729 | 1468 | 1.18 | 0.24 | 0.18 | 0.43 |
| YJL169W |       | 1685 | 1431 | 1.18 | 0.24 | 0.18 | 0.43 |
| YOR367W | SCP1  | 2285 | 1940 | 1.18 | 0.24 | 0.18 | 0.43 |
| YHR007C | ERG11 | 9024 | 7666 | 1.18 | 0.24 | 0.18 | 0.43 |
| YOR079C | ATX2  | 498  | 423  | 1.18 | 0.23 | 0.18 | 0.43 |
| YBR065C | ECM2  | 827  | 703  | 1.18 | 0.23 | 0.18 | 0.43 |
| YDR443C | SSN2  | 1593 | 1355 | 1.18 | 0.23 | 0.18 | 0.43 |
| YNL023C | FAP1  | 2043 | 1737 | 1.18 | 0.23 | 0.18 | 0.43 |
| YNL124W |       | 3352 | 2852 | 1.18 | 0.23 | 0.18 | 0.43 |
| YDL151C |       | 2354 | 2003 | 1.18 | 0.23 | 0.18 | 0.43 |
| YMR090W |       | 1430 | 1217 | 1.18 | 0.23 | 0.18 | 0.43 |
| YMR305C | SCW10 | 2934 | 2497 | 1.17 | 0.23 | 0.18 | 0.43 |
| YDR085C | AFR1  | 1906 | 1623 | 1.17 | 0.23 | 0.18 | 0.42 |
| YPL240C | HSP82 | 3790 | 3228 | 1.17 | 0.23 | 0.18 | 0.42 |
| YPR144C |       | 1391 | 1185 | 1.17 | 0.23 | 0.18 | 0.42 |
| YDR510W | SMT3  | 1623 | 1382 | 1.17 | 0.23 | 0.18 | 0.42 |
| YJR099W | YUH1  | 1080 | 920  | 1.17 | 0.23 | 0.18 | 0.42 |
| YLR146C | SPE4  | 4773 | 4066 | 1.17 | 0.23 | 0.18 | 0.42 |
| YDR275W |       | 1369 | 1167 | 1.17 | 0.23 | 0.17 | 0.42 |
| YPR128C |       | 2240 | 1909 | 1.17 | 0.23 | 0.17 | 0.42 |
| YKL091C |       | 682  | 581  | 1.17 | 0.23 | 0.17 | 0.42 |
| YHR107C | CDC12 | 2119 | 1806 | 1.17 | 0.23 | 0.17 | 0.42 |
| YGL162W | SUT1  | 415  | 354  | 1.17 | 0.23 | 0.17 | 0.42 |
| YGR268C |       | 3479 | 2967 | 1.17 | 0.23 | 0.17 | 0.42 |
| YHR140W |       | 1848 | 1576 | 1.17 | 0.23 | 0.17 | 0.42 |
| YER128W |       | 443  | 378  | 1.17 | 0.23 | 0.17 | 0.42 |
| YCR107W | AAD3  | 1832 | 1563 | 1.17 | 0.23 | 0.17 | 0.42 |
| YPL199C |       | 768  | 655  | 1.17 | 0.23 | 0.17 | 0.42 |
| YLR019W |       | 2611 | 2228 | 1.17 | 0.23 | 0.17 | 0.42 |

|           |       |      |      |      |      |      |      |
|-----------|-------|------|------|------|------|------|------|
| YPR034W   | ARP7  | 2753 | 2350 | 1.17 | 0.23 | 0.17 | 0.42 |
| YJR014W   |       | 1122 | 958  | 1.17 | 0.23 | 0.17 | 0.42 |
| YOR101W   | RAS1  | 3245 | 2771 | 1.17 | 0.23 | 0.17 | 0.41 |
| YOL152W   | FRE7  | 2743 | 2342 | 1.17 | 0.23 | 0.17 | 0.41 |
| YNL186W   | UBP10 | 817  | 698  | 1.17 | 0.23 | 0.17 | 0.41 |
| YHL010C   |       | 567  | 484  | 1.17 | 0.23 | 0.17 | 0.41 |
| YER186C   |       | 705  | 602  | 1.17 | 0.23 | 0.17 | 0.41 |
| YJL083W   |       | 1152 | 984  | 1.17 | 0.23 | 0.17 | 0.41 |
| YGL109W   |       | 1465 | 1252 | 1.17 | 0.23 | 0.17 | 0.41 |
| YNL146W   |       | 1145 | 979  | 1.17 | 0.23 | 0.17 | 0.41 |
| YDR370C   |       | 659  | 563  | 1.17 | 0.23 | 0.17 | 0.41 |
| YER125W   | RSP5  | 2819 | 2410 | 1.17 | 0.23 | 0.17 | 0.41 |
| YCL007C   | CWH36 | 2425 | 2074 | 1.17 | 0.23 | 0.17 | 0.41 |
| YJL206C-A |       | 1331 | 1138 | 1.17 | 0.23 | 0.17 | 0.41 |
| YPL262W   | FUM1  | 1399 | 1196 | 1.17 | 0.23 | 0.17 | 0.41 |
| YBR300C   |       | 817  | 699  | 1.17 | 0.23 | 0.17 | 0.41 |
| YIL102C   |       | 1124 | 961  | 1.17 | 0.23 | 0.17 | 0.41 |
| YJR093C   | FIP1  | 598  | 512  | 1.17 | 0.22 | 0.17 | 0.41 |
| YMR187C   |       | 730  | 625  | 1.17 | 0.22 | 0.17 | 0.41 |
| YCLX01W   |       | 2439 | 2088 | 1.17 | 0.22 | 0.17 | 0.41 |
| YDL228C   |       | 5486 | 4698 | 1.17 | 0.22 | 0.17 | 0.40 |
| YDL203C   |       | 2068 | 1771 | 1.17 | 0.22 | 0.17 | 0.40 |
| YJR089W   | BIR1  | 2284 | 1956 | 1.17 | 0.22 | 0.17 | 0.40 |
| YBR174C   |       | 812  | 696  | 1.17 | 0.22 | 0.17 | 0.40 |
| YER146W   | LSM5  | 713  | 611  | 1.17 | 0.22 | 0.17 | 0.40 |
| YKL148C   | SDH1  | 5066 | 4341 | 1.17 | 0.22 | 0.17 | 0.40 |
| YKL165C   | MCD4  | 3014 | 2583 | 1.17 | 0.22 | 0.17 | 0.40 |
| YHR020W   |       | 2554 | 2189 | 1.17 | 0.22 | 0.17 | 0.40 |
| YJL014W   | CCT3  | 5547 | 4755 | 1.17 | 0.22 | 0.17 | 0.40 |
| YMR269W   |       | 3091 | 2650 | 1.17 | 0.22 | 0.17 | 0.40 |
| YBR172C   | SMY2  | 3183 | 2729 | 1.17 | 0.22 | 0.17 | 0.40 |
| YIL113W   |       | 984  | 844  | 1.17 | 0.22 | 0.17 | 0.40 |
| YDR522C   | SPS2  | 602  | 516  | 1.17 | 0.22 | 0.17 | 0.40 |
| YJL006C   | CTK2  | 1133 | 972  | 1.17 | 0.22 | 0.17 | 0.40 |
| YAL007C   | ERP2  | 2801 | 2402 | 1.17 | 0.22 | 0.17 | 0.40 |
| YJL183W   | MNN11 | 2470 | 2119 | 1.17 | 0.22 | 0.17 | 0.40 |

|         |       |      |      |      |      |      |      |
|---------|-------|------|------|------|------|------|------|
| YMR200W | ROT1  | 529  | 454  | 1.17 | 0.22 | 0.16 | 0.40 |
| YOL083W |       | 1024 | 879  | 1.17 | 0.22 | 0.16 | 0.40 |
| YNL192W | CHS1  | 1821 | 1563 | 1.17 | 0.22 | 0.16 | 0.40 |
| YDR273W |       | 2683 | 2303 | 1.17 | 0.22 | 0.16 | 0.40 |
| YGR231C | PHB2  | 1842 | 1581 | 1.16 | 0.22 | 0.16 | 0.40 |
| YNL121C | TOM70 | 1740 | 1495 | 1.16 | 0.22 | 0.16 | 0.39 |
| YPR203W |       | 2469 | 2122 | 1.16 | 0.22 | 0.16 | 0.39 |
| YJR153W | PGU1  | 1142 | 982  | 1.16 | 0.22 | 0.16 | 0.39 |
| YFL060C | SNO3  | 1962 | 1687 | 1.16 | 0.22 | 0.16 | 0.39 |
| YGL200C | EMP24 | 1578 | 1357 | 1.16 | 0.22 | 0.16 | 0.39 |
| YNL098C | RAS2  | 320  | 275  | 1.16 | 0.22 | 0.16 | 0.39 |
| YKL116C |       | 1535 | 1321 | 1.16 | 0.22 | 0.16 | 0.39 |
| YNL120C |       | 5296 | 4557 | 1.16 | 0.22 | 0.16 | 0.39 |
| YMR207C | HFA1  | 1068 | 919  | 1.16 | 0.22 | 0.16 | 0.39 |
| YFR025C | HIS2  | 1900 | 1635 | 1.16 | 0.22 | 0.16 | 0.39 |
| YLR266C |       | 1231 | 1060 | 1.16 | 0.22 | 0.16 | 0.39 |
| YMR260C | TIF11 | 2623 | 2258 | 1.16 | 0.22 | 0.16 | 0.39 |
| YLL029W |       | 4210 | 3625 | 1.16 | 0.22 | 0.16 | 0.39 |
| YBR281C |       | 4841 | 4169 | 1.16 | 0.22 | 0.16 | 0.39 |
| YDR175C |       | 2856 | 2460 | 1.16 | 0.22 | 0.16 | 0.38 |
| YPL124W | NIP29 | 536  | 462  | 1.16 | 0.22 | 0.16 | 0.38 |
| YHR113W |       | 2651 | 2283 | 1.16 | 0.22 | 0.16 | 0.38 |
| YLR204W | QRI5  | 2674 | 2303 | 1.16 | 0.22 | 0.16 | 0.38 |
| YHR005C | GPA1  | 1125 | 969  | 1.16 | 0.22 | 0.16 | 0.38 |
| YKL202W |       | 506  | 436  | 1.16 | 0.22 | 0.16 | 0.38 |
| YMR006C | PLB2  | 1007 | 868  | 1.16 | 0.21 | 0.16 | 0.38 |
| YPL116W | HOS3  | 860  | 741  | 1.16 | 0.21 | 0.16 | 0.38 |
| YKR071C |       | 3750 | 3233 | 1.16 | 0.21 | 0.16 | 0.38 |
| YILO18W | RPL2B | 5842 | 5038 | 1.16 | 0.21 | 0.16 | 0.38 |
| YHR019C | DED81 | 2522 | 2175 | 1.16 | 0.21 | 0.16 | 0.38 |
| YDR360W |       | 3809 | 3285 | 1.16 | 0.21 | 0.16 | 0.38 |
| YHR076W |       | 1340 | 1156 | 1.16 | 0.21 | 0.16 | 0.38 |
| YCR053W | THR4  | 2647 | 2283 | 1.16 | 0.21 | 0.16 | 0.38 |
| YML100W | TSL1  | 2695 | 2325 | 1.16 | 0.21 | 0.16 | 0.38 |
| YHR004C | NEM1  | 816  | 704  | 1.16 | 0.21 | 0.16 | 0.38 |
| YBR133C | HSL7  | 3181 | 2744 | 1.16 | 0.21 | 0.16 | 0.38 |

|           |        |      |      |      |      |      |      |
|-----------|--------|------|------|------|------|------|------|
| YDR405W   | MRP20  | 2303 | 1987 | 1.16 | 0.21 | 0.16 | 0.38 |
| YMR251W-A | HOR7   | 460  | 397  | 1.16 | 0.21 | 0.16 | 0.38 |
| YBR164C   | ARL1   | 1839 | 1587 | 1.16 | 0.21 | 0.16 | 0.38 |
| YGL038C   | OCH1   | 3732 | 3220 | 1.16 | 0.21 | 0.16 | 0.38 |
| YIRO23W   | DAL81  | 1941 | 1675 | 1.16 | 0.21 | 0.16 | 0.38 |
| YJL154C   | VPS35  | 3556 | 3069 | 1.16 | 0.21 | 0.16 | 0.38 |
| YKL136W   |        | 377  | 325  | 1.16 | 0.21 | 0.16 | 0.38 |
| YNL018C   |        | 1799 | 1553 | 1.16 | 0.21 | 0.16 | 0.38 |
| YHR053C   | CUP1-1 | 2249 | 1941 | 1.16 | 0.21 | 0.16 | 0.38 |
| YFL033C   | RIM15  | 2434 | 2101 | 1.16 | 0.21 | 0.16 | 0.38 |
| YER081W   | SER3   | 1843 | 1591 | 1.16 | 0.21 | 0.16 | 0.38 |
| YJR158W   | HXT16  | 694  | 599  | 1.16 | 0.21 | 0.16 | 0.38 |
| YGL173C   | KEM1   | 2480 | 2141 | 1.16 | 0.21 | 0.16 | 0.38 |
| YOR247W   | SRL1   | 952  | 822  | 1.16 | 0.21 | 0.16 | 0.37 |
| YBR062C   |        | 1030 | 890  | 1.16 | 0.21 | 0.16 | 0.37 |
| YLL028W   | TPO1   | 1372 | 1185 | 1.16 | 0.21 | 0.16 | 0.37 |
| YDR354W   | TRP4   | 1160 | 1002 | 1.16 | 0.21 | 0.16 | 0.37 |
| YML078W   | CPR3   | 1958 | 1692 | 1.16 | 0.21 | 0.15 | 0.37 |
| YJR090C   | GRR1   | 1408 | 1217 | 1.16 | 0.21 | 0.15 | 0.37 |
| YOR223W   |        | 834  | 721  | 1.16 | 0.21 | 0.15 | 0.37 |
| YLR378C   | SEC61  | 2602 | 2249 | 1.16 | 0.21 | 0.15 | 0.37 |
| YILO41W   |        | 649  | 561  | 1.16 | 0.21 | 0.15 | 0.37 |
| YDR282C   |        | 1681 | 1453 | 1.16 | 0.21 | 0.15 | 0.37 |
| YOL153C   |        | 1600 | 1383 | 1.16 | 0.21 | 0.15 | 0.37 |
| YKL086W   |        | 5922 | 5121 | 1.16 | 0.21 | 0.15 | 0.37 |
| YBR004C   |        | 868  | 751  | 1.16 | 0.21 | 0.15 | 0.37 |
| YDR258C   | HSP78  | 1147 | 992  | 1.16 | 0.21 | 0.15 | 0.37 |
| YDR073W   | SNF11  | 1797 | 1555 | 1.16 | 0.21 | 0.15 | 0.37 |
| YPL190C   | NAB3   | 6243 | 5403 | 1.16 | 0.21 | 0.15 | 0.37 |
| YCR070W   |        | 1399 | 1211 | 1.15 | 0.21 | 0.15 | 0.37 |
| YOR211C   | MGM1   | 1494 | 1294 | 1.15 | 0.21 | 0.15 | 0.37 |
| YGR198W   |        | 2215 | 1918 | 1.15 | 0.21 | 0.15 | 0.37 |
| YOR172W   |        | 745  | 645  | 1.15 | 0.21 | 0.15 | 0.37 |
| YOR342C   |        | 1958 | 1696 | 1.15 | 0.21 | 0.15 | 0.36 |
| YNL005C   | MRP7   | 2648 | 2294 | 1.15 | 0.21 | 0.15 | 0.36 |
| YKR037C   | SPC34  | 591  | 512  | 1.15 | 0.21 | 0.15 | 0.36 |

|         |       |       |      |      |      |      |      |
|---------|-------|-------|------|------|------|------|------|
| YOR280C |       | 1648  | 1428 | 1.15 | 0.21 | 0.15 | 0.36 |
| YGR134W |       | 1890  | 1638 | 1.15 | 0.21 | 0.15 | 0.36 |
| YOL104C | NDJ1  | 832   | 721  | 1.15 | 0.21 | 0.15 | 0.36 |
| YFR056C |       | 2542  | 2203 | 1.15 | 0.21 | 0.15 | 0.36 |
| YMR199W | CLN1  | 1437  | 1246 | 1.15 | 0.21 | 0.15 | 0.36 |
| YOL088C | MPD2  | 1629  | 1412 | 1.15 | 0.21 | 0.15 | 0.36 |
| YOR390W |       | 1142  | 990  | 1.15 | 0.21 | 0.15 | 0.36 |
| YBR105C | VID24 | 1311  | 1137 | 1.15 | 0.21 | 0.15 | 0.36 |
| YGL185C |       | 2738  | 2374 | 1.15 | 0.21 | 0.15 | 0.36 |
| YOR332W | VMA4  | 775   | 672  | 1.15 | 0.21 | 0.15 | 0.36 |
| YNR026C | SEC12 | 1886  | 1636 | 1.15 | 0.21 | 0.15 | 0.36 |
| YOR031W | CRS5  | 314   | 272  | 1.15 | 0.21 | 0.15 | 0.36 |
| YGR113W | DAM1  | 1130  | 980  | 1.15 | 0.21 | 0.15 | 0.36 |
| YPL115C | BEM3  | 1815  | 1575 | 1.15 | 0.20 | 0.15 | 0.36 |
| YLR056W | ERG3  | 4607  | 3998 | 1.15 | 0.20 | 0.15 | 0.36 |
| YNL096C | RPS7B | 310   | 269  | 1.15 | 0.20 | 0.15 | 0.36 |
| YOR339C | UBC11 | 1234  | 1071 | 1.15 | 0.20 | 0.15 | 0.36 |
| YEL036C | ANP1  | 5606  | 4867 | 1.15 | 0.20 | 0.15 | 0.36 |
| YBR056W |       | 1747  | 1517 | 1.15 | 0.20 | 0.15 | 0.36 |
| YPR161C | SGV1  | 2215  | 1923 | 1.15 | 0.20 | 0.15 | 0.36 |
| YGL194C | HOS2  | 470   | 408  | 1.15 | 0.20 | 0.15 | 0.36 |
| YCR021C | HSP30 | 3605  | 3131 | 1.15 | 0.20 | 0.15 | 0.36 |
| YBR106W | PHO88 | 2585  | 2246 | 1.15 | 0.20 | 0.15 | 0.35 |
| YNL081C |       | 372   | 323  | 1.15 | 0.20 | 0.15 | 0.35 |
| YKL216W | URA1  | 673   | 585  | 1.15 | 0.20 | 0.15 | 0.35 |
| YLR202C |       | 1713  | 1489 | 1.15 | 0.20 | 0.15 | 0.35 |
| YOR188W | MSB1  | 1827  | 1588 | 1.15 | 0.20 | 0.15 | 0.35 |
| YMR079W | SEC14 | 1336  | 1161 | 1.15 | 0.20 | 0.15 | 0.35 |
| YDR127W | ARO1  | 1438  | 1251 | 1.15 | 0.20 | 0.15 | 0.35 |
| YJR057W | CDC8  | 865   | 752  | 1.15 | 0.20 | 0.15 | 0.35 |
| YMR263W |       | 2722  | 2368 | 1.15 | 0.20 | 0.14 | 0.35 |
| YGR192C | TDH3  | 10580 | 9206 | 1.15 | 0.20 | 0.14 | 0.35 |
| YLR324W |       | 5358  | 4662 | 1.15 | 0.20 | 0.14 | 0.35 |
| YKL069W |       | 3947  | 3436 | 1.15 | 0.20 | 0.14 | 0.35 |
| YJL197W | UBP12 | 1385  | 1206 | 1.15 | 0.20 | 0.14 | 0.35 |
| YOR307C | SLY41 | 1314  | 1144 | 1.15 | 0.20 | 0.14 | 0.35 |

|           |           |      |      |      |      |      |      |
|-----------|-----------|------|------|------|------|------|------|
| YMR028W   | TAP42     | 1218 | 1061 | 1.15 | 0.20 | 0.14 | 0.35 |
| YNL072W   | RNH35     | 2072 | 1805 | 1.15 | 0.20 | 0.14 | 0.34 |
| YNL043C   |           | 1432 | 1248 | 1.15 | 0.20 | 0.14 | 0.34 |
| YGL108C   |           | 1124 | 979  | 1.15 | 0.20 | 0.14 | 0.34 |
| YBR189W   | RPS9B     | 2661 | 2319 | 1.15 | 0.20 | 0.14 | 0.34 |
| YGR183C   | QCR9      | 524  | 457  | 1.15 | 0.20 | 0.14 | 0.34 |
| YLR232W   |           | 541  | 472  | 1.15 | 0.20 | 0.14 | 0.34 |
| YHR197W   |           | 1579 | 1377 | 1.15 | 0.20 | 0.14 | 0.34 |
| YIRO21W   | MRS1      | 3566 | 3110 | 1.15 | 0.20 | 0.14 | 0.34 |
| YDR531W   |           | 1664 | 1451 | 1.15 | 0.20 | 0.14 | 0.34 |
| YDR436W   | PPZ2      | 2915 | 2542 | 1.15 | 0.20 | 0.14 | 0.34 |
| YMR285C   |           | 3904 | 3405 | 1.15 | 0.20 | 0.14 | 0.34 |
| YBR043C   |           | 2672 | 2331 | 1.15 | 0.20 | 0.14 | 0.34 |
| YBR127C   | VMA2      | 3209 | 2799 | 1.15 | 0.20 | 0.14 | 0.34 |
| YJR106W   | ECM27     | 1435 | 1252 | 1.15 | 0.20 | 0.14 | 0.34 |
| YMR098C   |           | 748  | 653  | 1.15 | 0.20 | 0.14 | 0.34 |
| YCRO20C   | PET18     | 1303 | 1137 | 1.15 | 0.20 | 0.14 | 0.34 |
| YFL067W   |           | 3729 | 3255 | 1.15 | 0.20 | 0.14 | 0.34 |
| YEL002C   | WBP1      | 3273 | 2857 | 1.15 | 0.20 | 0.14 | 0.34 |
| YDR508C   | GNP1      | 3670 | 3204 | 1.15 | 0.20 | 0.14 | 0.34 |
| YGR215W   |           | 844  | 737  | 1.15 | 0.20 | 0.14 | 0.34 |
| YMR143W   | RPS16A    | 4766 | 4162 | 1.15 | 0.20 | 0.14 | 0.34 |
| YJR132W   | NMD5      | 1307 | 1141 | 1.15 | 0.20 | 0.14 | 0.34 |
| YKL036C   |           | 2085 | 1821 | 1.15 | 0.20 | 0.14 | 0.34 |
| YJL153C   | INO1      | 628  | 549  | 1.14 | 0.19 | 0.14 | 0.34 |
| YFL022C   | FRS2      | 5710 | 4989 | 1.14 | 0.19 | 0.14 | 0.33 |
| YAL056W   |           | 774  | 676  | 1.14 | 0.19 | 0.14 | 0.33 |
| YFL001W   | DEG1      | 773  | 675  | 1.14 | 0.19 | 0.14 | 0.33 |
| YOR276W   | CAF20     | 458  | 400  | 1.14 | 0.19 | 0.14 | 0.33 |
| YDR178W   | SDH4      | 1298 | 1135 | 1.14 | 0.19 | 0.14 | 0.33 |
| YBR206W   |           | 1235 | 1080 | 1.14 | 0.19 | 0.14 | 0.33 |
| YPL105C   |           | 3231 | 2825 | 1.14 | 0.19 | 0.14 | 0.33 |
| YLR028C   | ADE16     | 4979 | 4354 | 1.14 | 0.19 | 0.14 | 0.33 |
| YHL050C   |           | 7805 | 6826 | 1.14 | 0.19 | 0.14 | 0.33 |
| YDL133C-A | YDL133C-A | 654  | 572  | 1.14 | 0.19 | 0.14 | 0.33 |
| YKL053C-A | YKL053C-A | 1040 | 910  | 1.14 | 0.19 | 0.14 | 0.33 |

|           |        |      |      |      |      |      |      |
|-----------|--------|------|------|------|------|------|------|
| YJL121C   | RPE1   | 733  | 641  | 1.14 | 0.19 | 0.14 | 0.33 |
| YGR077C   | PEX8   | 4101 | 3589 | 1.14 | 0.19 | 0.14 | 0.33 |
| YLR188W   | MDL1   | 2598 | 2275 | 1.14 | 0.19 | 0.14 | 0.33 |
| YOLO15W   |        | 1934 | 1693 | 1.14 | 0.19 | 0.14 | 0.33 |
| YMR261C   | TPS3   | 1712 | 1499 | 1.14 | 0.19 | 0.14 | 0.33 |
| YEL017C-A | PMP2   | 1524 | 1335 | 1.14 | 0.19 | 0.14 | 0.33 |
| YGR284C   |        | 1845 | 1616 | 1.14 | 0.19 | 0.14 | 0.33 |
| YPL059W   | GRX5   | 921  | 807  | 1.14 | 0.19 | 0.14 | 0.33 |
| YDR372C   |        | 9740 | 8531 | 1.14 | 0.19 | 0.14 | 0.33 |
| YPL134C   |        | 2904 | 2544 | 1.14 | 0.19 | 0.13 | 0.33 |
| YLL042C   | APG10  | 5362 | 4698 | 1.14 | 0.19 | 0.13 | 0.32 |
| YOR260W   | GCD1   | 1148 | 1006 | 1.14 | 0.19 | 0.13 | 0.32 |
| YIL074C   | SER33  | 3795 | 3326 | 1.14 | 0.19 | 0.13 | 0.32 |
| YDR146C   | SWI5   | 1245 | 1091 | 1.14 | 0.19 | 0.13 | 0.32 |
| YKL033W   |        | 1280 | 1122 | 1.14 | 0.19 | 0.13 | 0.32 |
| YML034W   | SRC1   | 549  | 481  | 1.14 | 0.19 | 0.13 | 0.32 |
| YFR010W   | UBP6   | 2447 | 2146 | 1.14 | 0.19 | 0.13 | 0.32 |
| YKR039W   | GAP1   | 2073 | 1818 | 1.14 | 0.19 | 0.13 | 0.32 |
| YDR388W   | RVS167 | 2131 | 1869 | 1.14 | 0.19 | 0.13 | 0.32 |
| YGL177W   |        | 351  | 308  | 1.14 | 0.19 | 0.13 | 0.32 |
| YIL161W   |        | 3698 | 3244 | 1.14 | 0.19 | 0.13 | 0.32 |
| YBR195C   | MSI1   | 9900 | 8685 | 1.14 | 0.19 | 0.13 | 0.32 |
| YER097W   |        | 524  | 460  | 1.14 | 0.19 | 0.13 | 0.32 |
| YER189W   |        | 8472 | 7434 | 1.14 | 0.19 | 0.13 | 0.32 |
| YGR082W   | TOM20  | 2107 | 1849 | 1.14 | 0.19 | 0.13 | 0.32 |
| YDL220C   | CDC13  | 1120 | 983  | 1.14 | 0.19 | 0.13 | 0.32 |
| YGR179C   |        | 1043 | 915  | 1.14 | 0.19 | 0.13 | 0.32 |
| YER014W   | HEM14  | 2180 | 1913 | 1.14 | 0.19 | 0.13 | 0.32 |
| YJR009C   | TDH2   | 9083 | 7972 | 1.14 | 0.19 | 0.13 | 0.32 |
| YML058W   | SML1   | 1058 | 929  | 1.14 | 0.19 | 0.13 | 0.32 |
| YBR027C   |        | 923  | 810  | 1.14 | 0.19 | 0.13 | 0.32 |
| YLL055W   |        | 1074 | 943  | 1.14 | 0.19 | 0.13 | 0.32 |
| YLR194C   |        | 862  | 757  | 1.14 | 0.19 | 0.13 | 0.32 |
| YNL012W   | SPO1   | 2868 | 2519 | 1.14 | 0.19 | 0.13 | 0.32 |
| YGL252C   | RTG2   | 877  | 770  | 1.14 | 0.19 | 0.13 | 0.32 |
| YHR214W   |        | 1524 | 1339 | 1.14 | 0.19 | 0.13 | 0.32 |



|             |             |      |      |      |      |      |      |
|-------------|-------------|------|------|------|------|------|------|
| YOR185C     | GSP2        | 1007 | 885  | 1.14 | 0.19 | 0.13 | 0.32 |
| YPL088W     |             | 2889 | 2538 | 1.14 | 0.19 | 0.13 | 0.32 |
| YKL149C     | DBR1        | 2222 | 1952 | 1.14 | 0.19 | 0.13 | 0.32 |
| YNL097C     | PHO23       | 848  | 745  | 1.14 | 0.19 | 0.13 | 0.31 |
| YNL128W     | TEP1        | 545  | 479  | 1.14 | 0.19 | 0.13 | 0.31 |
| YML124C     | TUB3        | 1258 | 1106 | 1.14 | 0.19 | 0.13 | 0.31 |
| YOR194C     | TOA1        | 1971 | 1733 | 1.14 | 0.19 | 0.13 | 0.31 |
| YBR082C     | UBC4        | 4859 | 4272 | 1.14 | 0.19 | 0.13 | 0.31 |
| YPR145W     | ASN1        | 3488 | 3067 | 1.14 | 0.19 | 0.13 | 0.31 |
| YKL177W     |             | 580  | 510  | 1.14 | 0.19 | 0.13 | 0.31 |
| YNL148C     | ALF1        | 1158 | 1018 | 1.14 | 0.19 | 0.13 | 0.31 |
| YJLWdelta8  | YJLWdelta8  | 503  | 442  | 1.14 | 0.19 | 0.13 | 0.31 |
| YBR091C     | MRS5        | 465  | 409  | 1.14 | 0.19 | 0.13 | 0.31 |
| YBR142W     | MAK5        | 7255 | 6385 | 1.14 | 0.18 | 0.13 | 0.31 |
| YDR338C     |             | 1348 | 1186 | 1.14 | 0.18 | 0.13 | 0.31 |
| YLR191W     | PEX13       | 3165 | 2786 | 1.14 | 0.18 | 0.13 | 0.31 |
| YDR120C     | TRM1        | 2483 | 2186 | 1.14 | 0.18 | 0.13 | 0.31 |
| YOR064C     |             | 607  | 534  | 1.14 | 0.18 | 0.13 | 0.31 |
| YPL220W     | RPL1A       | 3123 | 2749 | 1.14 | 0.18 | 0.13 | 0.31 |
| YNL084C     | END3        | 2101 | 1850 | 1.14 | 0.18 | 0.13 | 0.31 |
| YDR129C     | SAC6        | 1946 | 1714 | 1.14 | 0.18 | 0.13 | 0.31 |
| YHR153C     | SPO16       | 1291 | 1137 | 1.14 | 0.18 | 0.13 | 0.31 |
| YBL088C     | TEL1        | 5204 | 4585 | 1.14 | 0.18 | 0.13 | 0.31 |
| YGL230C     |             | 3681 | 3243 | 1.14 | 0.18 | 0.13 | 0.31 |
| YGL191W     | COX13       | 1555 | 1370 | 1.13 | 0.18 | 0.13 | 0.31 |
| YER061C     | CEM1        | 1916 | 1688 | 1.13 | 0.18 | 0.13 | 0.31 |
| YPL280W     |             | 1877 | 1654 | 1.13 | 0.18 | 0.13 | 0.30 |
| YNL041C     |             | 1041 | 918  | 1.13 | 0.18 | 0.13 | 0.30 |
| YOR272W     | YTM1        | 1687 | 1487 | 1.13 | 0.18 | 0.13 | 0.30 |
| YGL233W     | SEC15       | 4044 | 3566 | 1.13 | 0.18 | 0.13 | 0.30 |
| YDL051W     | YLA1        | 1592 | 1404 | 1.13 | 0.18 | 0.13 | 0.30 |
| YKRO46C     |             | 5001 | 4410 | 1.13 | 0.18 | 0.13 | 0.30 |
| YIL076W     | SEC28       | 963  | 849  | 1.13 | 0.18 | 0.13 | 0.30 |
| YLR330W     | CHS5        | 2309 | 2037 | 1.13 | 0.18 | 0.12 | 0.30 |
| YGR036C     | CAX4        | 1828 | 1613 | 1.13 | 0.18 | 0.12 | 0.30 |
| YBRCdelta19 | YBRCdelta19 | 816  | 720  | 1.13 | 0.18 | 0.12 | 0.30 |

|           |        |      |      |      |      |      |      |
|-----------|--------|------|------|------|------|------|------|
| YCR106W   |        | 2305 | 2034 | 1.13 | 0.18 | 0.12 | 0.30 |
| YKR024C   | DBP7   | 1905 | 1681 | 1.13 | 0.18 | 0.12 | 0.30 |
| YDL192W   | ARF1   | 1585 | 1399 | 1.13 | 0.18 | 0.12 | 0.30 |
| YLR159W   |        | 5702 | 5033 | 1.13 | 0.18 | 0.12 | 0.30 |
| YDL115C   |        | 1282 | 1132 | 1.13 | 0.18 | 0.12 | 0.30 |
| YGL207W   | SPT16  | 5020 | 4432 | 1.13 | 0.18 | 0.12 | 0.30 |
| YJL052W   | TDH1   | 4699 | 4149 | 1.13 | 0.18 | 0.12 | 0.30 |
| YIL039W   |        | 3462 | 3057 | 1.13 | 0.18 | 0.12 | 0.30 |
| YMR284W   | YKU70  | 2430 | 2146 | 1.13 | 0.18 | 0.12 | 0.30 |
| YJL095W   | BCK1   | 3199 | 2825 | 1.13 | 0.18 | 0.12 | 0.30 |
| YFR034C   | PHO4   | 1573 | 1389 | 1.13 | 0.18 | 0.12 | 0.30 |
| YMR142C   | RPL13B | 6036 | 5331 | 1.13 | 0.18 | 0.12 | 0.30 |
| YGL084C   |        | 1758 | 1553 | 1.13 | 0.18 | 0.12 | 0.30 |
| YGR065C   | VHT1   | 1475 | 1303 | 1.13 | 0.18 | 0.12 | 0.30 |
| YNL194C   |        | 538  | 475  | 1.13 | 0.18 | 0.12 | 0.30 |
| YMR081C   | ISF1   | 867  | 766  | 1.13 | 0.18 | 0.12 | 0.30 |
| YGL234W   | ADE5,7 | 2977 | 2631 | 1.13 | 0.18 | 0.12 | 0.30 |
| YIL024C   |        | 4062 | 3590 | 1.13 | 0.18 | 0.12 | 0.30 |
| YDR157W   |        | 380  | 336  | 1.13 | 0.18 | 0.12 | 0.30 |
| YGR089W   |        | 2968 | 2623 | 1.13 | 0.18 | 0.12 | 0.29 |
| YER052C   | HOM3   | 1138 | 1006 | 1.13 | 0.18 | 0.12 | 0.29 |
| YML046W   | PRP39  | 1206 | 1066 | 1.13 | 0.18 | 0.12 | 0.29 |
| YLL035W   |        | 3083 | 2726 | 1.13 | 0.18 | 0.12 | 0.29 |
| YML007W   | YAP1   | 8592 | 7598 | 1.13 | 0.18 | 0.12 | 0.29 |
| YJL167W   | ERG20  | 3008 | 2660 | 1.13 | 0.18 | 0.12 | 0.29 |
| YCR029C-A |        | 512  | 453  | 1.13 | 0.18 | 0.12 | 0.29 |
| YPR043W   | RPL43A | 1331 | 1177 | 1.13 | 0.18 | 0.12 | 0.29 |
| YBR039W   | ATP3   | 988  | 874  | 1.13 | 0.18 | 0.12 | 0.29 |
| YER176W   | ECM32  | 3217 | 2846 | 1.13 | 0.18 | 0.12 | 0.29 |
| YML126C   | HMGS   | 4546 | 4023 | 1.13 | 0.18 | 0.12 | 0.29 |
| YER056C   | FCY2   | 860  | 761  | 1.13 | 0.18 | 0.12 | 0.29 |
| YPR127W   |        | 1665 | 1474 | 1.13 | 0.18 | 0.12 | 0.29 |
| YKL141W   | SDH3   | 975  | 863  | 1.13 | 0.18 | 0.12 | 0.29 |
| YMR039C   | SUB1   | 3158 | 2796 | 1.13 | 0.18 | 0.12 | 0.29 |
| YHR203C   | RPS4B  | 788  | 698  | 1.13 | 0.18 | 0.12 | 0.29 |
| YAR073W   |        | 8981 | 7954 | 1.13 | 0.18 | 0.12 | 0.29 |

|            |            |      |      |      |      |      |      |
|------------|------------|------|------|------|------|------|------|
| YHR049C-A  |            | 4795 | 4248 | 1.13 | 0.17 | 0.12 | 0.29 |
| YCL048W    |            | 3762 | 3333 | 1.13 | 0.17 | 0.12 | 0.29 |
| YPR048W    | TAH18      | 4493 | 3982 | 1.13 | 0.17 | 0.12 | 0.29 |
| YDR134C    |            | 2371 | 2101 | 1.13 | 0.17 | 0.12 | 0.29 |
| YMR089C    | YTA12      | 2743 | 2431 | 1.13 | 0.17 | 0.12 | 0.28 |
| YDRCdelta9 | YDRCdelta9 | 791  | 701  | 1.13 | 0.17 | 0.12 | 0.28 |
| YGL181W    | GTS1       | 6771 | 6004 | 1.13 | 0.17 | 0.12 | 0.28 |
| YPR028W    | YIP2       | 835  | 741  | 1.13 | 0.17 | 0.12 | 0.28 |
| YER063W    | THO1       | 900  | 798  | 1.13 | 0.17 | 0.12 | 0.28 |
| YML125C    |            | 1880 | 1668 | 1.13 | 0.17 | 0.12 | 0.28 |
| YKRO06C    | MRPL13     | 832  | 738  | 1.13 | 0.17 | 0.12 | 0.28 |
| YNL066W    | SUN4       | 1740 | 1544 | 1.13 | 0.17 | 0.12 | 0.28 |
| YMR131C    |            | 2112 | 1874 | 1.13 | 0.17 | 0.12 | 0.28 |
| YBR010W    | HHT1       | 1477 | 1311 | 1.13 | 0.17 | 0.12 | 0.28 |
| YGR181W    | TIM13      | 696  | 618  | 1.13 | 0.17 | 0.12 | 0.28 |
| YDL123W    |            | 1326 | 1177 | 1.13 | 0.17 | 0.12 | 0.28 |
| YDL241W    |            | 517  | 459  | 1.13 | 0.17 | 0.12 | 0.28 |
| YPR024W    | YME1       | 1529 | 1358 | 1.13 | 0.17 | 0.12 | 0.28 |
| YBL022C    | PIM1       | 4279 | 3800 | 1.13 | 0.17 | 0.12 | 0.28 |
| YOL117W    |            | 788  | 700  | 1.13 | 0.17 | 0.12 | 0.28 |
| YDR242W    | AMD2       | 900  | 799  | 1.13 | 0.17 | 0.12 | 0.28 |
| YBL027W    | RPL19B     | 2959 | 2629 | 1.13 | 0.17 | 0.11 | 0.28 |
| YKL174C    |            | 1738 | 1544 | 1.13 | 0.17 | 0.11 | 0.28 |
| YNL026W    |            | 3780 | 3360 | 1.13 | 0.17 | 0.11 | 0.28 |
| YDR528W    |            | 1888 | 1678 | 1.12 | 0.17 | 0.11 | 0.27 |
| YER115C    | SPR6       | 682  | 606  | 1.12 | 0.17 | 0.11 | 0.27 |
| YDL076C    |            | 1409 | 1253 | 1.12 | 0.17 | 0.11 | 0.27 |
| YDR034C    | LYS14      | 1406 | 1250 | 1.12 | 0.17 | 0.11 | 0.27 |
| YPR124W    | CTR1       | 4254 | 3783 | 1.12 | 0.17 | 0.11 | 0.27 |
| YJR147W    | HMS2       | 1968 | 1750 | 1.12 | 0.17 | 0.11 | 0.27 |
| YHR079C-B  |            | 2083 | 1853 | 1.12 | 0.17 | 0.11 | 0.27 |
| YLR258W    | GSY2       | 1906 | 1696 | 1.12 | 0.17 | 0.11 | 0.27 |
| YLR246W    | ERF2       | 1076 | 958  | 1.12 | 0.17 | 0.11 | 0.27 |
| YNL008C    |            | 1011 | 900  | 1.12 | 0.17 | 0.11 | 0.27 |
| YDL032W    |            | 4072 | 3625 | 1.12 | 0.17 | 0.11 | 0.27 |
| YER041W    |            | 746  | 664  | 1.12 | 0.17 | 0.11 | 0.27 |

|         |        |      |      |      |      |      |      |
|---------|--------|------|------|------|------|------|------|
| YLR436C | ECM30  | 3620 | 3223 | 1.12 | 0.17 | 0.11 | 0.27 |
| YOL067C | RTG1   | 1412 | 1257 | 1.12 | 0.17 | 0.11 | 0.27 |
| YNR019W | ARE2   | 1874 | 1669 | 1.12 | 0.17 | 0.11 | 0.27 |
| YBR173C | UMP1   | 4400 | 3919 | 1.12 | 0.17 | 0.11 | 0.27 |
| YNL302C | RPS19B | 1729 | 1540 | 1.12 | 0.17 | 0.11 | 0.27 |
| YOR374W | ALD4   | 1432 | 1276 | 1.12 | 0.17 | 0.11 | 0.27 |
| YPL206C |        | 2203 | 1962 | 1.12 | 0.17 | 0.11 | 0.27 |
| YML043C | RRN11  | 924  | 823  | 1.12 | 0.17 | 0.11 | 0.27 |
| YLR049C |        | 1937 | 1726 | 1.12 | 0.17 | 0.11 | 0.27 |
| YDR137W | RGP1   | 2592 | 2310 | 1.12 | 0.17 | 0.11 | 0.27 |
| YDL031W | DBP10  | 2064 | 1840 | 1.12 | 0.17 | 0.11 | 0.27 |
| YDL004W | ATP16  | 1508 | 1344 | 1.12 | 0.17 | 0.11 | 0.26 |
| YDR049W |        | 1120 | 999  | 1.12 | 0.16 | 0.11 | 0.26 |
| YHR099W | TRA1   | 4799 | 4281 | 1.12 | 0.16 | 0.11 | 0.26 |
| YER013W | PRP22  | 2322 | 2072 | 1.12 | 0.16 | 0.11 | 0.26 |
| YOR329C | SCD5   | 1264 | 1128 | 1.12 | 0.16 | 0.11 | 0.26 |
| YGR125W |        | 2312 | 2063 | 1.12 | 0.16 | 0.11 | 0.26 |
| YLR037C |        | 1228 | 1096 | 1.12 | 0.16 | 0.11 | 0.26 |
| YJL010C |        | 4590 | 4098 | 1.12 | 0.16 | 0.11 | 0.26 |
| YLR003C |        | 880  | 786  | 1.12 | 0.16 | 0.11 | 0.26 |
| YOL080C |        | 402  | 359  | 1.12 | 0.16 | 0.11 | 0.26 |
| YER174C | GRX4   | 639  | 571  | 1.12 | 0.16 | 0.11 | 0.26 |
| YPR018W | RLF2   | 2497 | 2230 | 1.12 | 0.16 | 0.11 | 0.26 |
| YDL009C |        | 7408 | 6618 | 1.12 | 0.16 | 0.11 | 0.26 |
| YCL016C |        | 3451 | 3085 | 1.12 | 0.16 | 0.11 | 0.25 |
| YLR384C | IKI3   | 1302 | 1164 | 1.12 | 0.16 | 0.11 | 0.25 |
| YGR027C | RPS25A | 845  | 756  | 1.12 | 0.16 | 0.10 | 0.25 |
| YBL113C |        | 3430 | 3069 | 1.12 | 0.16 | 0.10 | 0.25 |
| YDL242W |        | 653  | 584  | 1.12 | 0.16 | 0.10 | 0.25 |
| YGL059W |        | 1535 | 1374 | 1.12 | 0.16 | 0.10 | 0.25 |
| YGR046W |        | 2079 | 1861 | 1.12 | 0.16 | 0.10 | 0.25 |
| YDL021W | GPM2   | 1874 | 1678 | 1.12 | 0.16 | 0.10 | 0.25 |
| YPR173C | VPS4   | 2288 | 2049 | 1.12 | 0.16 | 0.10 | 0.25 |
| YDL090C | RAM1   | 1466 | 1313 | 1.12 | 0.16 | 0.10 | 0.25 |
| YNL054W | VAC7   | 2687 | 2406 | 1.12 | 0.16 | 0.10 | 0.25 |
| YBR001C | NTH2   | 1049 | 939  | 1.12 | 0.16 | 0.10 | 0.25 |

|         |        |      |      |      |      |      |      |
|---------|--------|------|------|------|------|------|------|
| YEL055C | POL5   | 3088 | 2765 | 1.12 | 0.16 | 0.10 | 0.25 |
| YHR044C | DOG1   | 1809 | 1620 | 1.12 | 0.16 | 0.10 | 0.25 |
| YAL023C | PMT2   | 4383 | 3927 | 1.12 | 0.16 | 0.10 | 0.25 |
| YDR099W | BMH2   | 3216 | 2882 | 1.12 | 0.16 | 0.10 | 0.25 |
| YAL061W |        | 1849 | 1657 | 1.12 | 0.16 | 0.10 | 0.25 |
| YIL173W | VTH1   | 1307 | 1171 | 1.12 | 0.16 | 0.10 | 0.25 |
| YLR195C | NMT1   | 2215 | 1985 | 1.12 | 0.16 | 0.10 | 0.25 |
| YNR009W |        | 965  | 865  | 1.12 | 0.16 | 0.10 | 0.25 |
| YNL091W |        | 467  | 419  | 1.12 | 0.16 | 0.10 | 0.25 |
| YMR086W |        | 2165 | 1941 | 1.12 | 0.16 | 0.10 | 0.24 |
| YLR120C | YPS1   | 3308 | 2966 | 1.12 | 0.16 | 0.10 | 0.24 |
| YDR303C |        | 465  | 417  | 1.12 | 0.16 | 0.10 | 0.24 |
| YBR025C |        | 5561 | 4989 | 1.11 | 0.16 | 0.10 | 0.24 |
| YBR200W | BEM1   | 2413 | 2165 | 1.11 | 0.16 | 0.10 | 0.24 |
| YPR070W | MED1   | 645  | 579  | 1.11 | 0.16 | 0.10 | 0.24 |
| YMR326C |        | 392  | 352  | 1.11 | 0.16 | 0.10 | 0.24 |
| YOR322C |        | 1859 | 1668 | 1.11 | 0.16 | 0.10 | 0.24 |
| YPR041W | TIF5   | 1579 | 1417 | 1.11 | 0.16 | 0.10 | 0.24 |
| YGR075C | PRP38  | 725  | 651  | 1.11 | 0.16 | 0.10 | 0.24 |
| YER073W | ALD5   | 920  | 826  | 1.11 | 0.16 | 0.10 | 0.24 |
| YGR078C | PAC10  | 1309 | 1175 | 1.11 | 0.16 | 0.10 | 0.24 |
| YIL070C | MAM33  | 2768 | 2485 | 1.11 | 0.16 | 0.10 | 0.24 |
| YGR224W |        | 1556 | 1397 | 1.11 | 0.16 | 0.10 | 0.24 |
| YNL147W | LSM7   | 1068 | 959  | 1.11 | 0.16 | 0.10 | 0.24 |
| YDR480W | DIG2   | 1137 | 1021 | 1.11 | 0.16 | 0.10 | 0.24 |
| YPL030W |        | 4803 | 4314 | 1.11 | 0.16 | 0.10 | 0.24 |
| YFL038C | YPT1   | 3751 | 3369 | 1.11 | 0.16 | 0.10 | 0.24 |
| YOR262W |        | 3720 | 3341 | 1.11 | 0.15 | 0.10 | 0.24 |
| YBR125C | PTC4   | 898  | 807  | 1.11 | 0.15 | 0.10 | 0.24 |
| YPR100W |        | 2744 | 2465 | 1.11 | 0.15 | 0.10 | 0.24 |
| YAR071W | PHO11  | 7528 | 6763 | 1.11 | 0.15 | 0.10 | 0.24 |
| YLR085C | ARP6   | 2245 | 2017 | 1.11 | 0.15 | 0.10 | 0.24 |
| YML014W |        | 1952 | 1754 | 1.11 | 0.15 | 0.10 | 0.24 |
| YJL026W | RNR2   | 4412 | 3966 | 1.11 | 0.15 | 0.10 | 0.24 |
| YJL177W | RPL17B | 1121 | 1008 | 1.11 | 0.15 | 0.10 | 0.24 |
| YDL132W | CDC53  | 3662 | 3292 | 1.11 | 0.15 | 0.10 | 0.24 |

|            |            |      |      |      |      |      |      |
|------------|------------|------|------|------|------|------|------|
| YPL188W    | POS5       | 2167 | 1949 | 1.11 | 0.15 | 0.10 | 0.23 |
| YCR045C    |            | 1349 | 1213 | 1.11 | 0.15 | 0.10 | 0.23 |
| YJL137C    | GLG2       | 666  | 599  | 1.11 | 0.15 | 0.10 | 0.23 |
| YAL032C    | PRP45      | 6338 | 5702 | 1.11 | 0.15 | 0.10 | 0.23 |
| YER141W    | COX15      | 1379 | 1241 | 1.11 | 0.15 | 0.10 | 0.23 |
| YDL128W    | VCX1       | 2373 | 2136 | 1.11 | 0.15 | 0.10 | 0.23 |
| YMR075C-A  |            | 835  | 752  | 1.11 | 0.15 | 0.10 | 0.23 |
| YHR006W    | STP2       | 1832 | 1649 | 1.11 | 0.15 | 0.10 | 0.23 |
| YIL134W    | FLX1       | 1091 | 982  | 1.11 | 0.15 | 0.10 | 0.23 |
| YAL044C    | GCV3       | 1346 | 1212 | 1.11 | 0.15 | 0.10 | 0.23 |
| YDR434W    |            | 1206 | 1086 | 1.11 | 0.15 | 0.10 | 0.23 |
| YIL009W    | FAA3       | 2275 | 2049 | 1.11 | 0.15 | 0.09 | 0.23 |
| YDL173W    |            | 2649 | 2386 | 1.11 | 0.15 | 0.09 | 0.23 |
| YLR368W    |            | 1417 | 1276 | 1.11 | 0.15 | 0.09 | 0.23 |
| YPL042C    | SSN3       | 2109 | 1900 | 1.11 | 0.15 | 0.09 | 0.23 |
| YIL035C    | CKA1       | 2213 | 1994 | 1.11 | 0.15 | 0.09 | 0.23 |
| YNL157W    |            | 785  | 707  | 1.11 | 0.15 | 0.09 | 0.23 |
| YPLCTy4-1D | YPLCTy4-1D | 504  | 454  | 1.11 | 0.15 | 0.09 | 0.23 |
| YPL247C    |            | 1363 | 1229 | 1.11 | 0.15 | 0.09 | 0.23 |
| YPL209C    | IPL1       | 317  | 286  | 1.11 | 0.15 | 0.09 | 0.23 |
| YKR066C    | CCP1       | 2259 | 2037 | 1.11 | 0.15 | 0.09 | 0.23 |
| YCL060C    |            | 3603 | 3249 | 1.11 | 0.15 | 0.09 | 0.23 |
| YER007W    | PAC2       | 1900 | 1713 | 1.11 | 0.15 | 0.09 | 0.23 |
| YBR077C    |            | 461  | 416  | 1.11 | 0.15 | 0.09 | 0.22 |
| YMR066W    | SOV1       | 1406 | 1268 | 1.11 | 0.15 | 0.09 | 0.22 |
| YMR182C    | RGM1       | 4012 | 3619 | 1.11 | 0.15 | 0.09 | 0.22 |
| YDR465C    | RMT2       | 2590 | 2337 | 1.11 | 0.15 | 0.09 | 0.22 |
| YPL028W    | ERG10      | 2339 | 2111 | 1.11 | 0.15 | 0.09 | 0.22 |
| YFL039C    | ACT1       | 6878 | 6207 | 1.11 | 0.15 | 0.09 | 0.22 |
| YLR319C    | BUD6       | 5554 | 5013 | 1.11 | 0.15 | 0.09 | 0.22 |
| YER037W    |            | 613  | 553  | 1.11 | 0.15 | 0.09 | 0.22 |
| YGR266W    |            | 2463 | 2223 | 1.11 | 0.15 | 0.09 | 0.22 |
| YMR008C    | PLB1       | 6385 | 5763 | 1.11 | 0.15 | 0.09 | 0.22 |
| YEL051W    | VMA8       | 1993 | 1799 | 1.11 | 0.15 | 0.09 | 0.22 |
| YKR030W    |            | 4624 | 4176 | 1.11 | 0.15 | 0.09 | 0.22 |
| YGR092W    | DBF2       | 1901 | 1717 | 1.11 | 0.15 | 0.09 | 0.22 |

|         |        |      |      |      |      |      |      |
|---------|--------|------|------|------|------|------|------|
| YJL155C | FBP26  | 1214 | 1097 | 1.11 | 0.15 | 0.09 | 0.22 |
| YHR103W | SBE22  | 2619 | 2366 | 1.11 | 0.15 | 0.09 | 0.22 |
| YLR305C | STT4   | 2619 | 2366 | 1.11 | 0.15 | 0.09 | 0.22 |
| YGL058W | RAD6   | 2464 | 2226 | 1.11 | 0.15 | 0.09 | 0.22 |
| YKR061W | KTR2   | 1748 | 1580 | 1.11 | 0.15 | 0.09 | 0.22 |
| YOR388C | FDH1   | 527  | 476  | 1.11 | 0.15 | 0.09 | 0.22 |
| YPR056W | TFB4   | 1567 | 1416 | 1.11 | 0.15 | 0.09 | 0.22 |
| YNL300W |        | 2078 | 1878 | 1.11 | 0.15 | 0.09 | 0.22 |
| YKR079C |        | 4491 | 4060 | 1.11 | 0.15 | 0.09 | 0.22 |
| YCR011C | ADP1   | 4711 | 4260 | 1.11 | 0.15 | 0.09 | 0.22 |
| YOR296W |        | 1698 | 1535 | 1.11 | 0.15 | 0.09 | 0.22 |
| YER064C |        | 740  | 669  | 1.11 | 0.15 | 0.09 | 0.22 |
| YDL202W | MRPL11 | 484  | 438  | 1.11 | 0.15 | 0.09 | 0.21 |
| YPL267W |        | 789  | 714  | 1.11 | 0.14 | 0.09 | 0.21 |
| YER025W | GCD11  | 1930 | 1746 | 1.11 | 0.14 | 0.09 | 0.21 |
| YLR151C |        | 3306 | 2991 | 1.11 | 0.14 | 0.09 | 0.21 |
| YMR306W | FKS3   | 1520 | 1375 | 1.11 | 0.14 | 0.09 | 0.21 |
| YHR063C |        | 620  | 561  | 1.11 | 0.14 | 0.09 | 0.21 |
| YNR069C |        | 846  | 766  | 1.10 | 0.14 | 0.09 | 0.21 |
| YKL125W | RRN3   | 2406 | 2178 | 1.10 | 0.14 | 0.09 | 0.21 |
| YDR494W |        | 1561 | 1413 | 1.10 | 0.14 | 0.09 | 0.21 |
| YDR102C |        | 2400 | 2173 | 1.10 | 0.14 | 0.09 | 0.21 |
| YMR283C | RIT1   | 852  | 772  | 1.10 | 0.14 | 0.09 | 0.21 |
| YDR263C | DIN7   | 977  | 885  | 1.10 | 0.14 | 0.09 | 0.21 |
| YGR187C | HGH1   | 2233 | 2023 | 1.10 | 0.14 | 0.09 | 0.21 |
| YBR017C | KAP104 | 994  | 901  | 1.10 | 0.14 | 0.09 | 0.21 |
| YGR094W | VAS1   | 5104 | 4627 | 1.10 | 0.14 | 0.09 | 0.21 |
| YBR282W | MRPL27 | 3927 | 3561 | 1.10 | 0.14 | 0.08 | 0.21 |
| YGL116W | CDC20  | 1586 | 1439 | 1.10 | 0.14 | 0.08 | 0.20 |
| YGR034W | RPL26B | 2161 | 1961 | 1.10 | 0.14 | 0.08 | 0.20 |
| YMR149W | SWP1   | 783  | 711  | 1.10 | 0.14 | 0.08 | 0.20 |
| YHL027W | RIM101 | 2312 | 2098 | 1.10 | 0.14 | 0.08 | 0.20 |
| YKL048C | ELM1   | 2241 | 2035 | 1.10 | 0.14 | 0.08 | 0.20 |
| YDL033C |        | 2701 | 2453 | 1.10 | 0.14 | 0.08 | 0.20 |
| YHR047C | AAP1'  | 559  | 508  | 1.10 | 0.14 | 0.08 | 0.20 |
| YKL074C | MUD2   | 4328 | 3930 | 1.10 | 0.14 | 0.08 | 0.20 |

|            |            |      |      |      |      |      |      |
|------------|------------|------|------|------|------|------|------|
| YOL007C    | CSI2       | 3484 | 3164 | 1.10 | 0.14 | 0.08 | 0.20 |
| YKL004W    | AUR1       | 3083 | 2800 | 1.10 | 0.14 | 0.08 | 0.20 |
| YHR056C    |            | 2349 | 2134 | 1.10 | 0.14 | 0.08 | 0.20 |
| YOR359W    |            | 3050 | 2771 | 1.10 | 0.14 | 0.08 | 0.20 |
| YGR193C    | PDX1       | 977  | 888  | 1.10 | 0.14 | 0.08 | 0.20 |
| YBR286W    | APE3       | 5396 | 4904 | 1.10 | 0.14 | 0.08 | 0.20 |
| YMR231W    | PEP5       | 4583 | 4166 | 1.10 | 0.14 | 0.08 | 0.20 |
| YPL264C    |            | 1551 | 1410 | 1.10 | 0.14 | 0.08 | 0.20 |
| YOR022C    |            | 1464 | 1331 | 1.10 | 0.14 | 0.08 | 0.20 |
| YBR145W    | ADH5       | 862  | 784  | 1.10 | 0.14 | 0.08 | 0.20 |
| YDL079C    | MRK1       | 1245 | 1132 | 1.10 | 0.14 | 0.08 | 0.20 |
| YHL004W    | MRP4       | 2018 | 1836 | 1.10 | 0.14 | 0.08 | 0.19 |
| YGL055W    | OLE1       | 6918 | 6293 | 1.10 | 0.14 | 0.08 | 0.19 |
| YML047C    |            | 1466 | 1334 | 1.10 | 0.14 | 0.08 | 0.19 |
| YKL112W    | ABF1       | 1871 | 1702 | 1.10 | 0.14 | 0.08 | 0.19 |
| YMR294W-A  |            | 2383 | 2169 | 1.10 | 0.14 | 0.08 | 0.19 |
| YNL246W    |            | 391  | 356  | 1.10 | 0.14 | 0.08 | 0.19 |
| YKL078W    |            | 861  | 784  | 1.10 | 0.14 | 0.08 | 0.19 |
| YOL028C    | YAP7       | 2652 | 2415 | 1.10 | 0.13 | 0.08 | 0.19 |
| YBL072C    | RPS8A      | 4958 | 4517 | 1.10 | 0.13 | 0.08 | 0.19 |
| YMR054W    | STV1       | 2603 | 2372 | 1.10 | 0.13 | 0.08 | 0.19 |
| YGLWdelta4 | YGLWdelta4 | 3588 | 3269 | 1.10 | 0.13 | 0.08 | 0.19 |
| YER190W    | YRF1-2     | 4208 | 3834 | 1.10 | 0.13 | 0.08 | 0.19 |
| YIL147C    | SLN1       | 2871 | 2617 | 1.10 | 0.13 | 0.08 | 0.19 |
| YOR110W    |            | 1970 | 1796 | 1.10 | 0.13 | 0.08 | 0.19 |
| YKL132C    | RMA1       | 769  | 701  | 1.10 | 0.13 | 0.08 | 0.19 |
| YOR368W    | RAD17      | 3935 | 3588 | 1.10 | 0.13 | 0.08 | 0.19 |
| YPL265W    | DIP5       | 3395 | 3096 | 1.10 | 0.13 | 0.08 | 0.19 |
| YER082C    |            | 2648 | 2415 | 1.10 | 0.13 | 0.08 | 0.19 |
| YCR088W    | ABP1       | 1716 | 1565 | 1.10 | 0.13 | 0.08 | 0.18 |
| YML102W    | CAC2       | 1738 | 1585 | 1.10 | 0.13 | 0.08 | 0.18 |
| YDR116C    |            | 2246 | 2049 | 1.10 | 0.13 | 0.08 | 0.18 |
| YJL059W    | YHC3       | 2023 | 1846 | 1.10 | 0.13 | 0.08 | 0.18 |
| YPL109C    |            | 682  | 622  | 1.10 | 0.13 | 0.08 | 0.18 |
| YOR008C    | SLG1       | 2623 | 2393 | 1.10 | 0.13 | 0.08 | 0.18 |
| YGR276C    | RNH70      | 2205 | 2012 | 1.10 | 0.13 | 0.08 | 0.18 |



|             |             |      |      |      |      |      |      |
|-------------|-------------|------|------|------|------|------|------|
| YOR149C     | SMP3        | 2906 | 2652 | 1.10 | 0.13 | 0.08 | 0.18 |
| YKL137W     |             | 2351 | 2146 | 1.10 | 0.13 | 0.08 | 0.18 |
| YBR064W     |             | 3327 | 3037 | 1.10 | 0.13 | 0.08 | 0.18 |
| YGR190C     |             | 2750 | 2510 | 1.10 | 0.13 | 0.08 | 0.18 |
| YNL308C     | KRI1        | 2760 | 2519 | 1.10 | 0.13 | 0.08 | 0.18 |
| YCRO69W     | SCC3        | 1700 | 1552 | 1.10 | 0.13 | 0.08 | 0.18 |
| YBL102W     | SFT2        | 689  | 629  | 1.10 | 0.13 | 0.08 | 0.18 |
| YCL057W     | PRD1        | 3933 | 3591 | 1.10 | 0.13 | 0.08 | 0.18 |
| YDR038C     | ENA5        | 321  | 293  | 1.10 | 0.13 | 0.07 | 0.18 |
| YMR278W     |             | 1248 | 1140 | 1.10 | 0.13 | 0.07 | 0.18 |
| YGL203C     | KEX1        | 6390 | 5835 | 1.10 | 0.13 | 0.07 | 0.18 |
| YFRWdelta10 | YFRWdelta10 | 458  | 418  | 1.09 | 0.13 | 0.07 | 0.18 |
| YBR126C     | TPS1        | 4236 | 3871 | 1.09 | 0.13 | 0.07 | 0.18 |
| YOL046C     |             | 8421 | 7698 | 1.09 | 0.13 | 0.07 | 0.18 |
| YJR145C     | RPS4A       | 3863 | 3531 | 1.09 | 0.13 | 0.07 | 0.18 |
| YLR218C     |             | 1348 | 1232 | 1.09 | 0.13 | 0.07 | 0.18 |
| YOR117W     | RPT5        | 2094 | 1914 | 1.09 | 0.13 | 0.07 | 0.18 |
| YNL092W     |             | 4236 | 3874 | 1.09 | 0.13 | 0.07 | 0.18 |
| YDR154C     |             | 5077 | 4645 | 1.09 | 0.13 | 0.07 | 0.17 |
| YLL056C     |             | 854  | 781  | 1.09 | 0.13 | 0.07 | 0.17 |
| YGL081W     |             | 953  | 872  | 1.09 | 0.13 | 0.07 | 0.17 |
| YPL232W     | SSO1        | 4444 | 4067 | 1.09 | 0.13 | 0.07 | 0.17 |
| YNL218W     |             | 1361 | 1246 | 1.09 | 0.13 | 0.07 | 0.17 |
| YGR041W     | BUD9        | 4456 | 4080 | 1.09 | 0.13 | 0.07 | 0.17 |
| YDR488C     | PAC11       | 1980 | 1813 | 1.09 | 0.13 | 0.07 | 0.17 |
| YDR497C     | ITR1        | 1624 | 1487 | 1.09 | 0.13 | 0.07 | 0.17 |
| YDR376W     | ARH1        | 3531 | 3234 | 1.09 | 0.13 | 0.07 | 0.17 |
| YNL195C     |             | 1354 | 1240 | 1.09 | 0.13 | 0.07 | 0.17 |
| YCL041C     |             | 3757 | 3442 | 1.09 | 0.13 | 0.07 | 0.17 |
| YIR004W     | DJP1        | 2315 | 2121 | 1.09 | 0.13 | 0.07 | 0.17 |
| YJR157W     |             | 1616 | 1481 | 1.09 | 0.13 | 0.07 | 0.17 |
| YKL051W     |             | 2537 | 2325 | 1.09 | 0.13 | 0.07 | 0.17 |
| YNL283C     | WSC2        | 2568 | 2354 | 1.09 | 0.13 | 0.07 | 0.17 |
| YNL220W     | ADE12       | 1244 | 1140 | 1.09 | 0.13 | 0.07 | 0.17 |
| YIL138C     | TPM2        | 1298 | 1190 | 1.09 | 0.13 | 0.07 | 0.17 |
| YER020W     | GPA2        | 934  | 856  | 1.09 | 0.13 | 0.07 | 0.17 |

|         |        |       |      |      |      |      |      |
|---------|--------|-------|------|------|------|------|------|
| YJL081C | ARP4   | 2009  | 1842 | 1.09 | 0.13 | 0.07 | 0.17 |
| YCR058C |        | 1855  | 1701 | 1.09 | 0.13 | 0.07 | 0.17 |
| YGR020C | VMA7   | 10015 | 9184 | 1.09 | 0.12 | 0.07 | 0.17 |
| YLR162W |        | 1074  | 985  | 1.09 | 0.12 | 0.07 | 0.17 |
| YER111C | SWI4   | 2267  | 2079 | 1.09 | 0.12 | 0.07 | 0.17 |
| YDR080W | VPS41  | 515   | 472  | 1.09 | 0.12 | 0.07 | 0.17 |
| YMR127C | SAS2   | 6290  | 5770 | 1.09 | 0.12 | 0.07 | 0.17 |
| YHR114W |        | 6256  | 5739 | 1.09 | 0.12 | 0.07 | 0.17 |
| YDR007W | TRP1   | 763   | 700  | 1.09 | 0.12 | 0.07 | 0.16 |
| YNL299W | TRF5   | 2305  | 2116 | 1.09 | 0.12 | 0.07 | 0.16 |
| YOR246C |        | 2153  | 1976 | 1.09 | 0.12 | 0.07 | 0.16 |
| YKL079W | SMY1   | 1500  | 1377 | 1.09 | 0.12 | 0.07 | 0.16 |
| YDR377W | ATP17  | 2934  | 2694 | 1.09 | 0.12 | 0.07 | 0.16 |
| YHL040C | ARN1   | 1524  | 1400 | 1.09 | 0.12 | 0.07 | 0.16 |
| YBR252W | DUT1   | 410   | 377  | 1.09 | 0.12 | 0.07 | 0.16 |
| YNL055C | POR1   | 2126  | 1953 | 1.09 | 0.12 | 0.07 | 0.16 |
| YBR257W | POP4   | 3335  | 3063 | 1.09 | 0.12 | 0.07 | 0.16 |
| YLL043W | FPS1   | 1953  | 1794 | 1.09 | 0.12 | 0.07 | 0.16 |
| YDR193W |        | 1552  | 1426 | 1.09 | 0.12 | 0.07 | 0.16 |
| YIL145C |        | 2328  | 2139 | 1.09 | 0.12 | 0.07 | 0.16 |
| YIL164C | NIT1   | 1695  | 1558 | 1.09 | 0.12 | 0.07 | 0.16 |
| YLL023C |        | 1713  | 1575 | 1.09 | 0.12 | 0.07 | 0.16 |
| YBR112C | CYC8   | 4028  | 3704 | 1.09 | 0.12 | 0.07 | 0.16 |
| YKL209C | STE6   | 1718  | 1580 | 1.09 | 0.12 | 0.06 | 0.16 |
| YIR005W | IST3   | 4119  | 3789 | 1.09 | 0.12 | 0.06 | 0.16 |
| YCL027W | FUS1   | 3128  | 2877 | 1.09 | 0.12 | 0.06 | 0.16 |
| YLR467W | YRF1-5 | 6493  | 5974 | 1.09 | 0.12 | 0.06 | 0.15 |
| YDR104C |        | 3478  | 3200 | 1.09 | 0.12 | 0.06 | 0.15 |
| YCR084C | TUP1   | 6049  | 5567 | 1.09 | 0.12 | 0.06 | 0.15 |
| YBR256C | RIB5   | 1842  | 1695 | 1.09 | 0.12 | 0.06 | 0.15 |
| YML031W | NDC1   | 2682  | 2469 | 1.09 | 0.12 | 0.06 | 0.15 |
| YJL044C | GYP6   | 959   | 883  | 1.09 | 0.12 | 0.06 | 0.15 |
| YER059W | PCL6   | 917   | 844  | 1.09 | 0.12 | 0.06 | 0.15 |
| YNL093W | YPT53  | 1189  | 1095 | 1.09 | 0.12 | 0.06 | 0.15 |
| YDR256C | CTA1   | 1219  | 1123 | 1.09 | 0.12 | 0.06 | 0.15 |
| YMR171C |        | 2275  | 2096 | 1.09 | 0.12 | 0.06 | 0.15 |

|            |            |      |      |      |      |      |      |
|------------|------------|------|------|------|------|------|------|
| YDL154W    | MSH5       | 576  | 531  | 1.09 | 0.12 | 0.06 | 0.15 |
| YLL018C    | DPS1       | 2418 | 2228 | 1.09 | 0.12 | 0.06 | 0.15 |
| YILO12W    |            | 5248 | 4836 | 1.09 | 0.12 | 0.06 | 0.15 |
| YDR458C    |            | 3846 | 3544 | 1.09 | 0.12 | 0.06 | 0.15 |
| YER088C    | DOT6       | 763  | 703  | 1.09 | 0.12 | 0.06 | 0.15 |
| YNR021W    |            | 2391 | 2204 | 1.09 | 0.12 | 0.06 | 0.15 |
| YOL057W    |            | 2888 | 2662 | 1.08 | 0.12 | 0.06 | 0.15 |
| YBL105C    | PKC1       | 507  | 468  | 1.08 | 0.12 | 0.06 | 0.15 |
| YEL004W    | YEA4       | 1373 | 1267 | 1.08 | 0.12 | 0.06 | 0.14 |
| YBL061C    | SKT5       | 7043 | 6501 | 1.08 | 0.12 | 0.06 | 0.14 |
| YDRWdelta7 | YDRWdelta7 | 741  | 684  | 1.08 | 0.12 | 0.06 | 0.14 |
| YLR035C    |            | 1400 | 1292 | 1.08 | 0.12 | 0.06 | 0.14 |
| YJR051W    | OSM1       | 1348 | 1244 | 1.08 | 0.12 | 0.06 | 0.14 |
| YDR072C    | IPT1       | 2270 | 2096 | 1.08 | 0.12 | 0.06 | 0.14 |
| YPR103W    | PRE2       | 3674 | 3392 | 1.08 | 0.12 | 0.06 | 0.14 |
| YILO38C    | NOT3       | 3683 | 3401 | 1.08 | 0.12 | 0.06 | 0.14 |
| YFL059W    | SNZ3       | 919  | 849  | 1.08 | 0.11 | 0.06 | 0.14 |
| YGR095C    | RRP46      | 704  | 650  | 1.08 | 0.11 | 0.06 | 0.14 |
| YPR039W    |            | 438  | 405  | 1.08 | 0.11 | 0.06 | 0.14 |
| YOR230W    | WTM1       | 1202 | 1111 | 1.08 | 0.11 | 0.06 | 0.14 |
| YPR021C    |            | 1171 | 1082 | 1.08 | 0.11 | 0.06 | 0.14 |
| YEL050C    | RML2       | 2838 | 2623 | 1.08 | 0.11 | 0.06 | 0.14 |
| YJR019C    | TES1       | 1545 | 1428 | 1.08 | 0.11 | 0.06 | 0.14 |
| YLR226W    | BUR2       | 569  | 526  | 1.08 | 0.11 | 0.06 | 0.14 |
| YGL123W    | RPS2       | 4515 | 4175 | 1.08 | 0.11 | 0.06 | 0.14 |
| YDR460W    | TFB3       | 1893 | 1750 | 1.08 | 0.11 | 0.06 | 0.14 |
| YFR022W    |            | 1790 | 1655 | 1.08 | 0.11 | 0.06 | 0.14 |
| YPL182C    |            | 2314 | 2140 | 1.08 | 0.11 | 0.06 | 0.14 |
| YEL048C    |            | 414  | 383  | 1.08 | 0.11 | 0.06 | 0.14 |
| YLL050C    | COF1       | 2483 | 2297 | 1.08 | 0.11 | 0.06 | 0.14 |
| YKR099W    | BAS1       | 3704 | 3426 | 1.08 | 0.11 | 0.06 | 0.14 |
| YNL291C    | MID1       | 4992 | 4618 | 1.08 | 0.11 | 0.06 | 0.14 |
| YNL268W    | LYP1       | 2184 | 2021 | 1.08 | 0.11 | 0.06 | 0.14 |
| YLL027W    | ISA1       | 441  | 408  | 1.08 | 0.11 | 0.06 | 0.13 |
| YGR128C    |            | 5056 | 4681 | 1.08 | 0.11 | 0.06 | 0.13 |
| YGL034C    |            | 840  | 778  | 1.08 | 0.11 | 0.06 | 0.13 |

|         |       |      |      |      |      |      |      |
|---------|-------|------|------|------|------|------|------|
| YBL101C | ECM21 | 920  | 852  | 1.08 | 0.11 | 0.06 | 0.13 |
| YDL155W | CLB3  | 2908 | 2693 | 1.08 | 0.11 | 0.05 | 0.13 |
| YPR162C | ORC4  | 1338 | 1239 | 1.08 | 0.11 | 0.05 | 0.13 |
| YPL266W | DIM1  | 1217 | 1127 | 1.08 | 0.11 | 0.05 | 0.13 |
| YDR098C | GRX3  | 598  | 554  | 1.08 | 0.11 | 0.05 | 0.13 |
| YBR267W |       | 2849 | 2639 | 1.08 | 0.11 | 0.05 | 0.13 |
| YLR182W | SWI6  | 4561 | 4225 | 1.08 | 0.11 | 0.05 | 0.13 |
| YGL245W |       | 4705 | 4360 | 1.08 | 0.11 | 0.05 | 0.13 |
| YBL090W | MRP21 | 565  | 524  | 1.08 | 0.11 | 0.05 | 0.13 |
| YMR017W | SPO20 | 417  | 386  | 1.08 | 0.11 | 0.05 | 0.13 |
| YGL135W | RPL1B | 3907 | 3621 | 1.08 | 0.11 | 0.05 | 0.13 |
| YBR092C | PHO3  | 1802 | 1670 | 1.08 | 0.11 | 0.05 | 0.13 |
| YNL020C | ARK1  | 1512 | 1403 | 1.08 | 0.11 | 0.05 | 0.13 |
| YDR539W |       | 3415 | 3168 | 1.08 | 0.11 | 0.05 | 0.13 |
| YKR063C | LAS1  | 2466 | 2289 | 1.08 | 0.11 | 0.05 | 0.12 |
| YNL028W |       | 4774 | 4431 | 1.08 | 0.11 | 0.05 | 0.12 |
| YCL049C |       | 2308 | 2142 | 1.08 | 0.11 | 0.05 | 0.12 |
| YEL034W | HYP2  | 4916 | 4563 | 1.08 | 0.11 | 0.05 | 0.12 |
| YNL286W | CUS2  | 1378 | 1279 | 1.08 | 0.11 | 0.05 | 0.12 |
| YPL041C |       | 850  | 789  | 1.08 | 0.11 | 0.05 | 0.12 |
| YOR264W |       | 1103 | 1024 | 1.08 | 0.11 | 0.05 | 0.12 |
| YBR055C | PRP6  | 389  | 361  | 1.08 | 0.11 | 0.05 | 0.12 |
| YBL060W |       | 1963 | 1823 | 1.08 | 0.11 | 0.05 | 0.12 |
| YDR280W | RRP45 | 1715 | 1593 | 1.08 | 0.11 | 0.05 | 0.12 |
| YCRX14W |       | 7850 | 7294 | 1.08 | 0.11 | 0.05 | 0.12 |
| YGL251C | HFM1  | 2536 | 2356 | 1.08 | 0.11 | 0.05 | 0.12 |
| YBL043W | ECM13 | 2513 | 2335 | 1.08 | 0.11 | 0.05 | 0.12 |
| YCR071C | IMG2  | 1855 | 1724 | 1.08 | 0.11 | 0.05 | 0.12 |
| YDR368W | YPR1  | 501  | 466  | 1.08 | 0.11 | 0.05 | 0.12 |
| YNL064C | YDJ1  | 597  | 555  | 1.08 | 0.11 | 0.05 | 0.12 |
| YDR391C |       | 1046 | 973  | 1.08 | 0.10 | 0.05 | 0.12 |
| YAR030C |       | 479  | 446  | 1.08 | 0.10 | 0.05 | 0.12 |
| YGL051W |       | 1026 | 954  | 1.08 | 0.10 | 0.05 | 0.12 |
| YFR015C | GSY1  | 2089 | 1943 | 1.07 | 0.10 | 0.05 | 0.12 |
| YBR242W |       | 3544 | 3297 | 1.07 | 0.10 | 0.05 | 0.12 |
| YDR513W | TTR1  | 517  | 481  | 1.07 | 0.10 | 0.05 | 0.12 |

|         |        |      |      |      |      |      |      |
|---------|--------|------|------|------|------|------|------|
| YLR101C |        | 7252 | 6748 | 1.07 | 0.10 | 0.05 | 0.12 |
| YLR290C |        | 516  | 480  | 1.07 | 0.10 | 0.05 | 0.12 |
| YDL174C | DLD1   | 7854 | 7309 | 1.07 | 0.10 | 0.05 | 0.11 |
| YBL084C | CDC27  | 3846 | 3579 | 1.07 | 0.10 | 0.05 | 0.11 |
| YMR061W | RNA14  | 4694 | 4369 | 1.07 | 0.10 | 0.05 | 0.11 |
| YML042W | CAT2   | 2454 | 2285 | 1.07 | 0.10 | 0.05 | 0.11 |
| YPL039W |        | 618  | 575  | 1.07 | 0.10 | 0.05 | 0.11 |
| YDR328C | SKP1   | 835  | 778  | 1.07 | 0.10 | 0.05 | 0.11 |
| YDR506C |        | 1137 | 1059 | 1.07 | 0.10 | 0.05 | 0.11 |
| YDR490C | PKH1   | 1430 | 1332 | 1.07 | 0.10 | 0.05 | 0.11 |
| YPR032W | SRO7   | 1561 | 1454 | 1.07 | 0.10 | 0.05 | 0.11 |
| YMR135C |        | 1379 | 1285 | 1.07 | 0.10 | 0.05 | 0.11 |
| YDL143W | CCT4   | 3011 | 2806 | 1.07 | 0.10 | 0.05 | 0.11 |
| YDL005C | MED2   | 2706 | 2522 | 1.07 | 0.10 | 0.05 | 0.11 |
| YKL035W | UGP1   | 5157 | 4806 | 1.07 | 0.10 | 0.05 | 0.11 |
| YKL043W | PHD1   | 2572 | 2397 | 1.07 | 0.10 | 0.05 | 0.11 |
| YER101C | AST2   | 424  | 395  | 1.07 | 0.10 | 0.05 | 0.11 |
| YJL157C | FAR1   | 414  | 386  | 1.07 | 0.10 | 0.05 | 0.11 |
| YDL038C |        | 1531 | 1427 | 1.07 | 0.10 | 0.04 | 0.11 |
| YBR229C | ROT2   | 4507 | 4202 | 1.07 | 0.10 | 0.04 | 0.11 |
| YLR221C |        | 1258 | 1173 | 1.07 | 0.10 | 0.04 | 0.11 |
| YDR471W | RPL27B | 3858 | 3598 | 1.07 | 0.10 | 0.04 | 0.11 |
| YDR392W | SPT3   | 1131 | 1055 | 1.07 | 0.10 | 0.04 | 0.11 |
| YJL117W | PHO86  | 1327 | 1238 | 1.07 | 0.10 | 0.04 | 0.11 |
| YLR140W |        | 2109 | 1968 | 1.07 | 0.10 | 0.04 | 0.11 |
| YOR324C |        | 989  | 923  | 1.07 | 0.10 | 0.04 | 0.11 |
| YNL104C | LEU4   | 8402 | 7840 | 1.07 | 0.10 | 0.04 | 0.11 |
| YCR015C |        | 1044 | 974  | 1.07 | 0.10 | 0.04 | 0.11 |
| YOR025W | HST3   | 1297 | 1211 | 1.07 | 0.10 | 0.04 | 0.10 |
| YOL106W |        | 3279 | 3062 | 1.07 | 0.10 | 0.04 | 0.10 |
| YLR005W | SSL1   | 1028 | 960  | 1.07 | 0.10 | 0.04 | 0.10 |
| YJL030W | MAD2   | 7028 | 6563 | 1.07 | 0.10 | 0.04 | 0.10 |
| YMR168C | CEP3   | 2469 | 2306 | 1.07 | 0.10 | 0.04 | 0.10 |
| YIRO43C |        | 785  | 733  | 1.07 | 0.10 | 0.04 | 0.10 |
| YML133C |        | 7586 | 7087 | 1.07 | 0.10 | 0.04 | 0.10 |
| YGL048C | RPT6   | 1780 | 1663 | 1.07 | 0.10 | 0.04 | 0.10 |

|         |       |      |      |      |      |      |      |
|---------|-------|------|------|------|------|------|------|
| YGL100W | SEH1  | 1625 | 1519 | 1.07 | 0.10 | 0.04 | 0.10 |
| YDL006W | PTC1  | 1367 | 1278 | 1.07 | 0.10 | 0.04 | 0.10 |
| YOR127W | RGA1  | 477  | 446  | 1.07 | 0.10 | 0.04 | 0.10 |
| YKL134C | 36433 | 1247 | 1166 | 1.07 | 0.10 | 0.04 | 0.10 |
| YPL070W |       | 1366 | 1277 | 1.07 | 0.10 | 0.04 | 0.10 |
| YBR138C | HDR1  | 1916 | 1791 | 1.07 | 0.10 | 0.04 | 0.10 |
| YGR021W |       | 1365 | 1276 | 1.07 | 0.10 | 0.04 | 0.10 |
| YOR328W | PDR10 | 4066 | 3802 | 1.07 | 0.10 | 0.04 | 0.10 |
| YIL045W | PIG2  | 1877 | 1755 | 1.07 | 0.10 | 0.04 | 0.10 |
| YCL019W |       | 9633 | 9011 | 1.07 | 0.10 | 0.04 | 0.10 |
| YJL162C |       | 1222 | 1143 | 1.07 | 0.10 | 0.04 | 0.10 |
| YOR039W | CKB2  | 1880 | 1760 | 1.07 | 0.10 | 0.04 | 0.10 |
| YBR066C | NRG2  | 2425 | 2270 | 1.07 | 0.10 | 0.04 | 0.10 |
| YGR208W | SER2  | 1744 | 1632 | 1.07 | 0.10 | 0.04 | 0.09 |
| YLR303W | MET17 | 8995 | 8420 | 1.07 | 0.10 | 0.04 | 0.09 |
| YJL085W | EXO70 | 980  | 917  | 1.07 | 0.10 | 0.04 | 0.09 |
| YGL120C | PRP43 | 3959 | 3707 | 1.07 | 0.10 | 0.04 | 0.09 |
| YLR446W |       | 1757 | 1645 | 1.07 | 0.09 | 0.04 | 0.09 |
| YPL278C |       | 435  | 407  | 1.07 | 0.09 | 0.04 | 0.09 |
| YDR159W | SAC3  | 4782 | 4477 | 1.07 | 0.09 | 0.04 | 0.09 |
| YNL263C | YIF1  | 2526 | 2365 | 1.07 | 0.09 | 0.04 | 0.09 |
| YGL239C |       | 1566 | 1466 | 1.07 | 0.09 | 0.04 | 0.09 |
| YNL298W | CLA4  | 2548 | 2386 | 1.07 | 0.09 | 0.04 | 0.09 |
| YDL159W | STE7  | 5387 | 5046 | 1.07 | 0.09 | 0.04 | 0.09 |
| YLR118C |       | 929  | 870  | 1.07 | 0.09 | 0.04 | 0.09 |
| YBL083C |       | 1748 | 1638 | 1.07 | 0.09 | 0.04 | 0.09 |
| YJL025W | RRN7  | 2286 | 2142 | 1.07 | 0.09 | 0.04 | 0.09 |
| YGR037C | ACB1  | 2675 | 2507 | 1.07 | 0.09 | 0.04 | 0.09 |
| YLL039C | UBI4  | 4303 | 4034 | 1.07 | 0.09 | 0.04 | 0.09 |
| YBL059W |       | 1164 | 1091 | 1.07 | 0.09 | 0.04 | 0.09 |
| YBR277C |       | 4700 | 4408 | 1.07 | 0.09 | 0.04 | 0.09 |
| YBR248C | HIS7  | 2876 | 2698 | 1.07 | 0.09 | 0.04 | 0.09 |
| YBR071W |       | 3968 | 3723 | 1.07 | 0.09 | 0.04 | 0.09 |
| YGL027C | CWH41 | 4910 | 4607 | 1.07 | 0.09 | 0.04 | 0.09 |
| YJL032W |       | 524  | 492  | 1.07 | 0.09 | 0.04 | 0.09 |
| YDL138W | RGT2  | 2825 | 2652 | 1.07 | 0.09 | 0.03 | 0.08 |

|           |       |       |       |      |      |      |      |
|-----------|-------|-------|-------|------|------|------|------|
| YIR037W   | HYR1  | 10727 | 10072 | 1.07 | 0.09 | 0.03 | 0.08 |
| YOR132W   | VPS17 | 972   | 913   | 1.06 | 0.09 | 0.03 | 0.08 |
| YPR110C   | RPC40 | 3212  | 3017  | 1.06 | 0.09 | 0.03 | 0.08 |
| YBL069W   | AST1  | 1521  | 1429  | 1.06 | 0.09 | 0.03 | 0.08 |
| YPR123C   |       | 3476  | 3267  | 1.06 | 0.09 | 0.03 | 0.08 |
| YDR101C   |       | 2684  | 2523  | 1.06 | 0.09 | 0.03 | 0.08 |
| YKR060W   |       | 614   | 577   | 1.06 | 0.09 | 0.03 | 0.08 |
| YCRX02C   |       | 3612  | 3395  | 1.06 | 0.09 | 0.03 | 0.08 |
| YIL066C   | RNR3  | 3386  | 3183  | 1.06 | 0.09 | 0.03 | 0.08 |
| YDR357C   |       | 1390  | 1307  | 1.06 | 0.09 | 0.03 | 0.08 |
| YAL046C   |       | 1860  | 1749  | 1.06 | 0.09 | 0.03 | 0.08 |
| YIL042C   |       | 1283  | 1207  | 1.06 | 0.09 | 0.03 | 0.08 |
| YMR244W   |       | 1693  | 1592  | 1.06 | 0.09 | 0.03 | 0.08 |
| YPR029C   | APL4  | 2879  | 2708  | 1.06 | 0.09 | 0.03 | 0.08 |
| YOL105C   | WSC3  | 1298  | 1221  | 1.06 | 0.09 | 0.03 | 0.08 |
| YNR067C   |       | 2657  | 2499  | 1.06 | 0.09 | 0.03 | 0.08 |
| YJL181W   |       | 601   | 565   | 1.06 | 0.09 | 0.03 | 0.08 |
| YJL134W   | LCB3  | 1609  | 1514  | 1.06 | 0.09 | 0.03 | 0.08 |
| YMR247C   |       | 2905  | 2733  | 1.06 | 0.09 | 0.03 | 0.08 |
| YMR322C   |       | 2091  | 1968  | 1.06 | 0.09 | 0.03 | 0.08 |
| YGL193C   |       | 529   | 498   | 1.06 | 0.09 | 0.03 | 0.08 |
| YGR197C   | SNG1  | 754   | 710   | 1.06 | 0.09 | 0.03 | 0.08 |
| YDR326C   |       | 3628  | 3415  | 1.06 | 0.09 | 0.03 | 0.07 |
| YBL036C   |       | 3303  | 3110  | 1.06 | 0.09 | 0.03 | 0.07 |
| YOR245C   |       | 1902  | 1791  | 1.06 | 0.09 | 0.03 | 0.07 |
| YBL025W   | RRN10 | 1952  | 1838  | 1.06 | 0.09 | 0.03 | 0.07 |
| YAL043C-A |       | 5150  | 4850  | 1.06 | 0.09 | 0.03 | 0.07 |
| YFR003C   |       | 4799  | 4520  | 1.06 | 0.09 | 0.03 | 0.07 |
| YGR200C   |       | 5737  | 5405  | 1.06 | 0.09 | 0.03 | 0.07 |
| YIR018W   | YAP5  | 1418  | 1336  | 1.06 | 0.09 | 0.03 | 0.07 |
| YMR273C   | ZDS1  | 2189  | 2063  | 1.06 | 0.09 | 0.03 | 0.07 |
| YGR001C   |       | 1534  | 1446  | 1.06 | 0.09 | 0.03 | 0.07 |
| YGR153W   |       | 1069  | 1008  | 1.06 | 0.09 | 0.03 | 0.07 |
| YDL135C   | RDI1  | 3797  | 3580  | 1.06 | 0.08 | 0.03 | 0.07 |
| YLR183C   |       | 1693  | 1596  | 1.06 | 0.08 | 0.03 | 0.07 |
| YBR269C   |       | 5710  | 5387  | 1.06 | 0.08 | 0.03 | 0.07 |

|            |            |      |      |      |      |      |      |
|------------|------------|------|------|------|------|------|------|
| YDR425W    |            | 2235 | 2109 | 1.06 | 0.08 | 0.03 | 0.07 |
| YAR050W    | FLO1       | 7546 | 7120 | 1.06 | 0.08 | 0.03 | 0.07 |
| YMR024W    | MRPL3      | 1104 | 1042 | 1.06 | 0.08 | 0.03 | 0.07 |
| YDR190C    | RVB1       | 5577 | 5266 | 1.06 | 0.08 | 0.03 | 0.06 |
| YDR191W    | HST4       | 1046 | 988  | 1.06 | 0.08 | 0.03 | 0.06 |
| YELCdelta4 | YELCdelta4 | 2173 | 2053 | 1.06 | 0.08 | 0.03 | 0.06 |
| YBR302C    | COS2       | 2990 | 2824 | 1.06 | 0.08 | 0.03 | 0.06 |
| YMR048W    |            | 850  | 803  | 1.06 | 0.08 | 0.03 | 0.06 |
| YFR006W    |            | 2314 | 2186 | 1.06 | 0.08 | 0.03 | 0.06 |
| YHR161C    | YAP1801    | 1469 | 1388 | 1.06 | 0.08 | 0.03 | 0.06 |
| YLL024C    | SSA2       | 7730 | 7306 | 1.06 | 0.08 | 0.03 | 0.06 |
| YJR043C    | POL32      | 603  | 570  | 1.06 | 0.08 | 0.03 | 0.06 |
| YOL112W    | MSB4       | 1371 | 1296 | 1.06 | 0.08 | 0.02 | 0.06 |
| YGR163W    | GTR2       | 1102 | 1042 | 1.06 | 0.08 | 0.02 | 0.06 |
| YGR026W    |            | 666  | 630  | 1.06 | 0.08 | 0.02 | 0.06 |
| YBLWdelta6 | YBLWdelta6 | 974  | 921  | 1.06 | 0.08 | 0.02 | 0.06 |
| YJL192C    |            | 2005 | 1897 | 1.06 | 0.08 | 0.02 | 0.06 |
| YOL103W    | ITR2       | 2238 | 2117 | 1.06 | 0.08 | 0.02 | 0.06 |
| YKR001C    | VPS1       | 1521 | 1439 | 1.06 | 0.08 | 0.02 | 0.06 |
| YPL043W    | NOP4       | 4759 | 4503 | 1.06 | 0.08 | 0.02 | 0.06 |
| YJL049W    |            | 638  | 604  | 1.06 | 0.08 | 0.02 | 0.06 |
| YNL172W    | APC1       | 4093 | 3875 | 1.06 | 0.08 | 0.02 | 0.05 |
| YPR064W    |            | 1343 | 1272 | 1.06 | 0.08 | 0.02 | 0.05 |
| YDR092W    | UBC13      | 412  | 390  | 1.06 | 0.08 | 0.02 | 0.05 |
| YLR331C    |            | 805  | 763  | 1.06 | 0.08 | 0.02 | 0.05 |
| YOL119C    |            | 3137 | 2973 | 1.06 | 0.08 | 0.02 | 0.05 |
| YDR337W    | MRPS28     | 1092 | 1035 | 1.06 | 0.08 | 0.02 | 0.05 |
| YGR074W    | SMD1       | 361  | 342  | 1.06 | 0.08 | 0.02 | 0.05 |
| YDR393W    | SHE9       | 3174 | 3008 | 1.06 | 0.08 | 0.02 | 0.05 |
| YAR018C    | KIN3       | 1917 | 1817 | 1.05 | 0.08 | 0.02 | 0.05 |
| YOL151W    | GRE2       | 2039 | 1933 | 1.05 | 0.08 | 0.02 | 0.05 |
| YJR150C    | DAN1       | 2011 | 1907 | 1.05 | 0.08 | 0.02 | 0.05 |
| YJL118W    |            | 1798 | 1705 | 1.05 | 0.08 | 0.02 | 0.05 |
| YNL141W    | AAH1       | 3433 | 3255 | 1.05 | 0.08 | 0.02 | 0.05 |
| YOL029C    |            | 1495 | 1418 | 1.05 | 0.08 | 0.02 | 0.05 |
| YOR038C    | HIR2       | 1331 | 1262 | 1.05 | 0.08 | 0.02 | 0.05 |



|         |        |      |      |      |      |      |      |
|---------|--------|------|------|------|------|------|------|
| YBR132C | AGP2   | 987  | 936  | 1.05 | 0.08 | 0.02 | 0.05 |
| YBR263W | SHM1   | 5824 | 5527 | 1.05 | 0.08 | 0.02 | 0.05 |
| YDR442W |        | 1095 | 1039 | 1.05 | 0.08 | 0.02 | 0.05 |
| YLR199C |        | 2316 | 2199 | 1.05 | 0.08 | 0.02 | 0.05 |
| YDR173C | ARG82  | 1359 | 1290 | 1.05 | 0.07 | 0.02 | 0.04 |
| YJL198W |        | 2531 | 2403 | 1.05 | 0.07 | 0.02 | 0.04 |
| YML052W | SUR7   | 1058 | 1005 | 1.05 | 0.07 | 0.02 | 0.04 |
| YKR031C | SPO14  | 1074 | 1020 | 1.05 | 0.07 | 0.02 | 0.04 |
| YGL097W | SRM1   | 1171 | 1112 | 1.05 | 0.07 | 0.02 | 0.04 |
| YHR165C | PRP8   | 1460 | 1387 | 1.05 | 0.07 | 0.02 | 0.04 |
| YDL097C | RPN6   | 1884 | 1790 | 1.05 | 0.07 | 0.02 | 0.04 |
| YKL071W |        | 1988 | 1889 | 1.05 | 0.07 | 0.02 | 0.04 |
| YMR229C | RRP5   | 1135 | 1078 | 1.05 | 0.07 | 0.02 | 0.04 |
| YDR408C | ADE8   | 5759 | 5472 | 1.05 | 0.07 | 0.02 | 0.04 |
| YGL016W | KAP122 | 2460 | 2338 | 1.05 | 0.07 | 0.02 | 0.04 |
| YNL257C | SIP3   | 1213 | 1153 | 1.05 | 0.07 | 0.02 | 0.04 |
| YDR111C |        | 1452 | 1380 | 1.05 | 0.07 | 0.02 | 0.04 |
| YGL165C |        | 6181 | 5876 | 1.05 | 0.07 | 0.02 | 0.04 |
| YAL027W |        | 3445 | 3275 | 1.05 | 0.07 | 0.02 | 0.04 |
| YNL330C | RPD3   | 2322 | 2208 | 1.05 | 0.07 | 0.02 | 0.04 |
| YMR001C | CDC5   | 2760 | 2624 | 1.05 | 0.07 | 0.02 | 0.04 |
| YHR201C | PPX1   | 2048 | 1947 | 1.05 | 0.07 | 0.02 | 0.04 |
| YPL009C |        | 2807 | 2669 | 1.05 | 0.07 | 0.02 | 0.04 |
| YAR020C | PAU7   | 3278 | 3117 | 1.05 | 0.07 | 0.02 | 0.04 |
| YGL151W | NUT1   | 4762 | 4530 | 1.05 | 0.07 | 0.02 | 0.04 |
| YIL071C |        | 3860 | 3672 | 1.05 | 0.07 | 0.02 | 0.04 |
| YOL145C | CTR9   | 694  | 660  | 1.05 | 0.07 | 0.02 | 0.04 |
| YBR103W |        | 2596 | 2470 | 1.05 | 0.07 | 0.02 | 0.04 |
| YGR264C | MES1   | 4665 | 4439 | 1.05 | 0.07 | 0.02 | 0.04 |
| YPL032C | SVL3   | 1464 | 1393 | 1.05 | 0.07 | 0.02 | 0.04 |
| YGL060W |        | 1718 | 1635 | 1.05 | 0.07 | 0.02 | 0.04 |
| YGL136C |        | 1430 | 1361 | 1.05 | 0.07 | 0.02 | 0.04 |
| YKL133C |        | 1263 | 1202 | 1.05 | 0.07 | 0.02 | 0.04 |
| YOL037C |        | 1040 | 990  | 1.05 | 0.07 | 0.02 | 0.04 |
| YFL044C |        | 1882 | 1791 | 1.05 | 0.07 | 0.02 | 0.04 |
| YGL153W | PEX14  | 1540 | 1466 | 1.05 | 0.07 | 0.02 | 0.04 |

|         |        |      |      |      |      |      |      |
|---------|--------|------|------|------|------|------|------|
| YIL054W |        | 4389 | 4178 | 1.05 | 0.07 | 0.02 | 0.04 |
| YGL126W | SCS3   | 1936 | 1843 | 1.05 | 0.07 | 0.02 | 0.04 |
| YIL047C | SYG1   | 2761 | 2628 | 1.05 | 0.07 | 0.01 | 0.04 |
| YHL021C |        | 5695 | 5421 | 1.05 | 0.07 | 0.01 | 0.04 |
| YDR444W |        | 2181 | 2076 | 1.05 | 0.07 | 0.01 | 0.04 |
| YKL214C |        | 650  | 619  | 1.05 | 0.07 | 0.01 | 0.04 |
| YOR009W |        | 966  | 920  | 1.05 | 0.07 | 0.01 | 0.04 |
| YER171W | RAD3   | 1528 | 1455 | 1.05 | 0.07 | 0.01 | 0.04 |
| YPL183C |        | 1615 | 1539 | 1.05 | 0.07 | 0.01 | 0.03 |
| YMR292W | GOT1   | 3300 | 3144 | 1.05 | 0.07 | 0.01 | 0.03 |
| YPL263C | KEL3   | 3429 | 3268 | 1.05 | 0.07 | 0.01 | 0.03 |
| YLR433C | CNA1   | 3310 | 3155 | 1.05 | 0.07 | 0.01 | 0.03 |
| YOR241W |        | 762  | 726  | 1.05 | 0.07 | 0.01 | 0.03 |
| YKL028W | TFA1   | 1545 | 1473 | 1.05 | 0.07 | 0.01 | 0.03 |
| YOL071W |        | 1857 | 1771 | 1.05 | 0.07 | 0.01 | 0.03 |
| YBR104W | YMC2   | 1512 | 1442 | 1.05 | 0.07 | 0.01 | 0.03 |
| YLR395C | COX8   | 384  | 366  | 1.05 | 0.07 | 0.01 | 0.03 |
| YPR091C |        | 1556 | 1484 | 1.05 | 0.07 | 0.01 | 0.03 |
| YJL146W | IDS2   | 1524 | 1454 | 1.05 | 0.07 | 0.01 | 0.03 |
| YDR232W | HEM1   | 5117 | 4881 | 1.05 | 0.07 | 0.01 | 0.03 |
| YGR147C | NAT2   | 593  | 566  | 1.05 | 0.07 | 0.01 | 0.03 |
| YHL025W | SNF6   | 2221 | 2119 | 1.05 | 0.07 | 0.01 | 0.03 |
| YGL061C | DUO1   | 615  | 587  | 1.05 | 0.07 | 0.01 | 0.03 |
| YGR013W | SNU71  | 2264 | 2161 | 1.05 | 0.07 | 0.01 | 0.03 |
| YMR232W | FUS2   | 1695 | 1618 | 1.05 | 0.07 | 0.01 | 0.03 |
| YKL068W | NUP100 | 5144 | 4910 | 1.05 | 0.07 | 0.01 | 0.03 |
| YKL006W | RPL14A | 2509 | 2396 | 1.05 | 0.07 | 0.01 | 0.02 |
| YJR151C |        | 2975 | 2842 | 1.05 | 0.07 | 0.01 | 0.02 |
| YLR437C |        | 2069 | 1977 | 1.05 | 0.07 | 0.01 | 0.02 |
| YBL016W | FUS3   | 2589 | 2474 | 1.05 | 0.07 | 0.01 | 0.02 |
| YLR197W | SIK1   | 2365 | 2260 | 1.05 | 0.07 | 0.01 | 0.02 |
| YLR208W | SEC13  | 3042 | 2907 | 1.05 | 0.07 | 0.01 | 0.02 |
| YER098W | UBP9   | 523  | 500  | 1.05 | 0.07 | 0.01 | 0.02 |
| YGR002C |        | 1207 | 1154 | 1.05 | 0.07 | 0.01 | 0.02 |
| YKL109W | HAP4   | 983  | 940  | 1.05 | 0.06 | 0.01 | 0.02 |
| YLR229C | CDC42  | 1682 | 1608 | 1.05 | 0.06 | 0.01 | 0.02 |

|            |            |       |       |      |      |      |      |
|------------|------------|-------|-------|------|------|------|------|
| YIL148W    | RPL40A     | 1843  | 1762  | 1.05 | 0.06 | 0.01 | 0.02 |
| YBR270C    |            | 4222  | 4038  | 1.05 | 0.06 | 0.01 | 0.02 |
| YHR097C    |            | 659   | 630   | 1.05 | 0.06 | 0.01 | 0.02 |
| YKL197C    | PEX1       | 2473  | 2365  | 1.05 | 0.06 | 0.01 | 0.02 |
| YBR023C    | CHS3       | 696   | 666   | 1.05 | 0.06 | 0.01 | 0.02 |
| YCRX13W    |            | 5086  | 4865  | 1.05 | 0.06 | 0.01 | 0.02 |
| YGL246C    | RAI1       | 4262  | 4079  | 1.04 | 0.06 | 0.01 | 0.02 |
| YHR048W    |            | 2482  | 2376  | 1.04 | 0.06 | 0.01 | 0.02 |
| YOL078W    |            | 5559  | 5323  | 1.04 | 0.06 | 0.01 | 0.02 |
| YOR027W    | STI1       | 2468  | 2363  | 1.04 | 0.06 | 0.01 | 0.02 |
| YOR196C    | LIP5       | 1730  | 1657  | 1.04 | 0.06 | 0.01 | 0.02 |
| YHR218W    |            | 11880 | 11377 | 1.04 | 0.06 | 0.01 | 0.02 |
| YBL030C    | PET9       | 3635  | 3482  | 1.04 | 0.06 | 0.01 | 0.01 |
| YLR130C    | ZRT2       | 2385  | 2285  | 1.04 | 0.06 | 0.01 | 0.01 |
| YPR105C    |            | 1361  | 1304  | 1.04 | 0.06 | 0.01 | 0.01 |
| YGR099W    | TEL2       | 3738  | 3583  | 1.04 | 0.06 | 0.00 | 0.01 |
| YOR275C    |            | 745   | 714   | 1.04 | 0.06 | 0.00 | 0.01 |
| YPL005W    |            | 925   | 887   | 1.04 | 0.06 | 0.00 | 0.01 |
| YLR273C    | PIG1       | 406   | 389   | 1.04 | 0.06 | 0.00 | 0.01 |
| YGL040C    | HEM2       | 2515  | 2412  | 1.04 | 0.06 | 0.00 | 0.01 |
| YCRX05W    |            | 4688  | 4498  | 1.04 | 0.06 | 0.00 | 0.01 |
| YOR197W    |            | 2044  | 1961  | 1.04 | 0.06 | 0.00 | 0.01 |
| YCRO46C    | IMG1       | 2740  | 2629  | 1.04 | 0.06 | 0.00 | 0.01 |
| YOL146W    |            | 337   | 323   | 1.04 | 0.06 | 0.00 | 0.01 |
| YLR007W    |            | 852   | 818   | 1.04 | 0.06 | 0.00 | 0.01 |
| YHL037C    |            | 7159  | 6870  | 1.04 | 0.06 | 0.00 | 0.01 |
| YKL198C    | PTK1       | 1412  | 1355  | 1.04 | 0.06 | 0.00 | 0.01 |
| YMR044W    |            | 1359  | 1304  | 1.04 | 0.06 | 0.00 | 0.01 |
| YJR056C    |            | 2288  | 2197  | 1.04 | 0.06 | 0.00 | 0.01 |
| YDR088C    | SLU7       | 2166  | 2080  | 1.04 | 0.06 | 0.00 | 0.01 |
| YCRCdelta6 | YCRCdelta6 | 662   | 636   | 1.04 | 0.06 | 0.00 | 0.01 |
| YOL039W    | RPP2A      | 1167  | 1121  | 1.04 | 0.06 | 0.00 | 0.01 |
| YMR005W    | MPT1       | 1175  | 1128  | 1.04 | 0.06 | 0.00 | 0.01 |
| YJR152W    | DAL5       | 1277  | 1227  | 1.04 | 0.06 | 0.00 | 0.00 |
| YGR040W    | KSS1       | 1030  | 990   | 1.04 | 0.06 | 0.00 | 0.00 |
| YGR291C    |            | 1667  | 1602  | 1.04 | 0.06 | 0.00 | 0.00 |

|         |       |      |      |      |      |       |       |
|---------|-------|------|------|------|------|-------|-------|
| YBR154C | RPB5  | 2814 | 2704 | 1.04 | 0.06 | 0.00  | 0.00  |
| YLR009W |       | 828  | 796  | 1.04 | 0.06 | 0.00  | 0.00  |
| YHR146W |       | 3302 | 3174 | 1.04 | 0.06 | 0.00  | 0.00  |
| YDR519W | FKB2  | 1719 | 1653 | 1.04 | 0.06 | 0.00  | 0.00  |
| YOR251C |       | 604  | 581  | 1.04 | 0.06 | 0.00  | 0.00  |
| YBL002W | HTB2  | 5842 | 5621 | 1.04 | 0.06 | 0.00  | 0.00  |
| YLR349W |       | 953  | 917  | 1.04 | 0.06 | 0.00  | 0.00  |
| YNL187W |       | 498  | 479  | 1.04 | 0.06 | 0.00  | 0.00  |
| YKR083C |       | 1075 | 1035 | 1.04 | 0.06 | 0.00  | 0.00  |
| YMR049C |       | 3821 | 3679 | 1.04 | 0.05 | 0.00  | 0.00  |
| YNR038W | DBP6  | 3369 | 3244 | 1.04 | 0.05 | 0.00  | 0.00  |
| YLL003W | SFI1  | 1050 | 1011 | 1.04 | 0.05 | 0.00  | 0.00  |
| YMR177W | MMT1  | 1005 | 968  | 1.04 | 0.05 | 0.00  | 0.00  |
| YGR260W |       | 6266 | 6036 | 1.04 | 0.05 | 0.00  | -0.01 |
| YDR140W |       | 385  | 371  | 1.04 | 0.05 | 0.00  | -0.01 |
| YIL096C |       | 6043 | 5826 | 1.04 | 0.05 | 0.00  | -0.01 |
| YJR069C | HAM1  | 601  | 579  | 1.04 | 0.05 | 0.00  | -0.01 |
| YNR032W | PPG1  | 2463 | 2375 | 1.04 | 0.05 | 0.00  | -0.01 |
| YDR042C |       | 1011 | 975  | 1.04 | 0.05 | 0.00  | -0.01 |
| YOL124C |       | 1755 | 1692 | 1.04 | 0.05 | 0.00  | -0.01 |
| YDR082W | STN1  | 332  | 320  | 1.04 | 0.05 | 0.00  | -0.01 |
| YLR228C | ECM22 | 892  | 861  | 1.04 | 0.05 | 0.00  | -0.01 |
| YCRO05C | CIT2  | 3734 | 3603 | 1.04 | 0.05 | 0.00  | -0.01 |
| YMR246W | FAA4  | 7453 | 7191 | 1.04 | 0.05 | 0.00  | -0.01 |
| YOR358W | HAP5  | 877  | 846  | 1.04 | 0.05 | 0.00  | -0.01 |
| YML110C | COQ5  | 2342 | 2260 | 1.04 | 0.05 | 0.00  | -0.01 |
| YAR043C |       | 2872 | 2772 | 1.04 | 0.05 | 0.00  | -0.01 |
| YGR227W | DIE2  | 1615 | 1559 | 1.04 | 0.05 | 0.00  | -0.01 |
| YPL162C |       | 6359 | 6138 | 1.04 | 0.05 | -0.01 | -0.01 |
| YBR241C |       | 1420 | 1371 | 1.04 | 0.05 | -0.01 | -0.01 |
| YPR125W |       | 1527 | 1474 | 1.04 | 0.05 | -0.01 | -0.01 |
| YGR115C |       | 2091 | 2019 | 1.04 | 0.05 | -0.01 | -0.01 |
| YNL088W | TOP2  | 3508 | 3387 | 1.04 | 0.05 | -0.01 | -0.01 |
| YLR288C | MEC3  | 1345 | 1299 | 1.04 | 0.05 | -0.01 | -0.01 |
| YMR195W |       | 458  | 442  | 1.04 | 0.05 | -0.01 | -0.01 |
| YBR253W | SRB6  | 3944 | 3809 | 1.04 | 0.05 | -0.01 | -0.01 |

|           |        |      |      |      |      |       |       |
|-----------|--------|------|------|------|------|-------|-------|
| YOR051C   |        | 1276 | 1233 | 1.04 | 0.05 | -0.01 | -0.02 |
| YMR318C   |        | 1539 | 1487 | 1.03 | 0.05 | -0.01 | -0.02 |
| YHR214W-A |        | 3479 | 3362 | 1.03 | 0.05 | -0.01 | -0.02 |
| YHR018C   | ARG4   | 3740 | 3615 | 1.03 | 0.05 | -0.01 | -0.02 |
| YIR026C   | YVH1   | 2318 | 2240 | 1.03 | 0.05 | -0.01 | -0.02 |
| YPL086C   | ELP3   | 2195 | 2122 | 1.03 | 0.05 | -0.01 | -0.02 |
| YNL335W   |        | 632  | 611  | 1.03 | 0.05 | -0.01 | -0.02 |
| YMR316C-A |        | 3201 | 3095 | 1.03 | 0.05 | -0.01 | -0.02 |
| YKL058W   | TOA2   | 2459 | 2378 | 1.03 | 0.05 | -0.01 | -0.02 |
| YLL008W   | DRS1   | 3752 | 3629 | 1.03 | 0.05 | -0.01 | -0.02 |
| YDR289C   | RTT103 | 1288 | 1246 | 1.03 | 0.05 | -0.01 | -0.02 |
| YMR111C   |        | 3729 | 3608 | 1.03 | 0.05 | -0.01 | -0.02 |
| YPL024W   | NCE4   | 1149 | 1112 | 1.03 | 0.05 | -0.01 | -0.02 |
| YNL267W   | PIK1   | 3278 | 3172 | 1.03 | 0.05 | -0.01 | -0.02 |
| YBL019W   | APN2   | 760  | 736  | 1.03 | 0.05 | -0.01 | -0.02 |
| YDL120W   | YFH1   | 2822 | 2732 | 1.03 | 0.05 | -0.01 | -0.02 |
| YER077C   |        | 563  | 545  | 1.03 | 0.05 | -0.01 | -0.02 |
| YBR019C   | GAL10  | 1041 | 1008 | 1.03 | 0.05 | -0.01 | -0.02 |
| YCR030C   |        | 5098 | 4935 | 1.03 | 0.05 | -0.01 | -0.02 |
| YNL002C   | RLP7   | 2678 | 2593 | 1.03 | 0.05 | -0.01 | -0.02 |
| YGL104C   |        | 745  | 721  | 1.03 | 0.05 | -0.01 | -0.02 |
| YFL026W   | STE2   | 3164 | 3064 | 1.03 | 0.05 | -0.01 | -0.02 |
| YPL126W   | NAN1   | 5238 | 5073 | 1.03 | 0.05 | -0.01 | -0.02 |
| YDR499W   |        | 1757 | 1702 | 1.03 | 0.05 | -0.01 | -0.02 |
| YBL103C   | RTG3   | 1302 | 1261 | 1.03 | 0.05 | -0.01 | -0.02 |
| YJR006W   | HYS2   | 4051 | 3925 | 1.03 | 0.05 | -0.01 | -0.03 |
| YGR240C   | PFK1   | 8891 | 8614 | 1.03 | 0.05 | -0.01 | -0.03 |
| YJR141W   |        | 1287 | 1247 | 1.03 | 0.05 | -0.01 | -0.03 |
| YGR071C   |        | 3608 | 3496 | 1.03 | 0.05 | -0.01 | -0.03 |
| YJL099W   | CHS6   | 2063 | 2000 | 1.03 | 0.04 | -0.01 | -0.03 |
| YLR394W   |        | 655  | 635  | 1.03 | 0.04 | -0.01 | -0.03 |
| YLR179C   |        | 1338 | 1297 | 1.03 | 0.04 | -0.01 | -0.03 |
| YBR272C   | HSM3   | 1422 | 1378 | 1.03 | 0.04 | -0.01 | -0.03 |
| YCR090C   |        | 4779 | 4633 | 1.03 | 0.04 | -0.01 | -0.03 |
| YDL042C   | SIR2   | 926  | 898  | 1.03 | 0.04 | -0.01 | -0.03 |
| YIL026C   | IRR1   | 4513 | 4376 | 1.03 | 0.04 | -0.01 | -0.03 |

|         |       |      |      |      |      |       |       |
|---------|-------|------|------|------|------|-------|-------|
| YJL195C |       | 1188 | 1152 | 1.03 | 0.04 | -0.01 | -0.03 |
| YJL038C |       | 868  | 842  | 1.03 | 0.04 | -0.01 | -0.03 |
| YOR070C | GYP1  | 1208 | 1172 | 1.03 | 0.04 | -0.01 | -0.03 |
| YGL244W | RTF1  | 1451 | 1407 | 1.03 | 0.04 | -0.01 | -0.03 |
| YPL214C | THI6  | 1992 | 1932 | 1.03 | 0.04 | -0.01 | -0.03 |
| YOR220W |       | 666  | 646  | 1.03 | 0.04 | -0.01 | -0.03 |
| YPR120C | CLB5  | 3549 | 3443 | 1.03 | 0.04 | -0.01 | -0.03 |
| YBL009W |       | 1926 | 1869 | 1.03 | 0.04 | -0.01 | -0.03 |
| YPL160W | CDC60 | 5699 | 5531 | 1.03 | 0.04 | -0.01 | -0.03 |
| YDR055W | PST1  | 1549 | 1503 | 1.03 | 0.04 | -0.01 | -0.03 |
| YEL057C |       | 1355 | 1315 | 1.03 | 0.04 | -0.01 | -0.03 |
| YKR092C | SRP40 | 1202 | 1167 | 1.03 | 0.04 | -0.01 | -0.03 |
| YJR160C |       | 539  | 523  | 1.03 | 0.04 | -0.01 | -0.03 |
| YML029W |       | 1263 | 1226 | 1.03 | 0.04 | -0.01 | -0.03 |
| YKR002W | PAP1  | 1861 | 1807 | 1.03 | 0.04 | -0.01 | -0.03 |
| YMR277W | FCP1  | 1047 | 1017 | 1.03 | 0.04 | -0.01 | -0.03 |
| YOL054W |       | 1109 | 1077 | 1.03 | 0.04 | -0.01 | -0.03 |
| YBR151W | APD1  | 2189 | 2126 | 1.03 | 0.04 | -0.01 | -0.03 |
| YPL118W | MRP51 | 1920 | 1865 | 1.03 | 0.04 | -0.01 | -0.03 |
| YDL116W | NUP84 | 2332 | 2265 | 1.03 | 0.04 | -0.01 | -0.03 |
| YKR004C | ECM9  | 1189 | 1155 | 1.03 | 0.04 | -0.01 | -0.03 |
| YJL212C |       | 1305 | 1268 | 1.03 | 0.04 | -0.01 | -0.03 |
| YGL128C |       | 2320 | 2254 | 1.03 | 0.04 | -0.01 | -0.04 |
| YMR275C | BUL1  | 2567 | 2494 | 1.03 | 0.04 | -0.01 | -0.04 |
| YBR211C | AME1  | 5405 | 5252 | 1.03 | 0.04 | -0.01 | -0.04 |
| YDR487C | RIB3  | 3630 | 3528 | 1.03 | 0.04 | -0.01 | -0.04 |
| YHR111W |       | 4372 | 4250 | 1.03 | 0.04 | -0.02 | -0.04 |
| YKR097W | PCK1  | 2485 | 2417 | 1.03 | 0.04 | -0.02 | -0.04 |
| YNL125C | ESBP6 | 2988 | 2907 | 1.03 | 0.04 | -0.02 | -0.04 |
| YEL037C | RAD23 | 2675 | 2602 | 1.03 | 0.04 | -0.02 | -0.04 |
| YNL275W |       | 2387 | 2322 | 1.03 | 0.04 | -0.02 | -0.04 |
| YIL131C | FKH1  | 1577 | 1534 | 1.03 | 0.04 | -0.02 | -0.04 |
| YBL010C |       | 1101 | 1071 | 1.03 | 0.04 | -0.02 | -0.04 |
| YER010C |       | 645  | 628  | 1.03 | 0.04 | -0.02 | -0.04 |
| YGR131W |       | 454  | 442  | 1.03 | 0.04 | -0.02 | -0.04 |
| YPR030W | CSR2  | 5001 | 4868 | 1.03 | 0.04 | -0.02 | -0.04 |

|            |            |      |      |      |      |       |       |
|------------|------------|------|------|------|------|-------|-------|
| YMR117C    | SPC24      | 3109 | 3027 | 1.03 | 0.04 | -0.02 | -0.04 |
| YML121W    | GTR1       | 2018 | 1965 | 1.03 | 0.04 | -0.02 | -0.04 |
| YOR254C    | SEC63      | 1267 | 1233 | 1.03 | 0.04 | -0.02 | -0.04 |
| YGR211W    | ZPR1       | 3343 | 3255 | 1.03 | 0.04 | -0.02 | -0.04 |
| YCLX12W    |            | 1590 | 1548 | 1.03 | 0.04 | -0.02 | -0.04 |
| YJL127C    | SPT10      | 3646 | 3550 | 1.03 | 0.04 | -0.02 | -0.04 |
| YJL021C    |            | 1796 | 1749 | 1.03 | 0.04 | -0.02 | -0.04 |
| YLR438W    | CAR2       | 3785 | 3687 | 1.03 | 0.04 | -0.02 | -0.04 |
| YDL092W    | SRP14      | 1147 | 1117 | 1.03 | 0.04 | -0.02 | -0.04 |
| YPL014W    |            | 2401 | 2339 | 1.03 | 0.04 | -0.02 | -0.04 |
| YBR240C    | THI2       | 1098 | 1070 | 1.03 | 0.04 | -0.02 | -0.04 |
| YNL154C    | YCK2       | 787  | 767  | 1.03 | 0.04 | -0.02 | -0.05 |
| YDR145W    | TAF61      | 2250 | 2193 | 1.03 | 0.04 | -0.02 | -0.05 |
| YBL111C    |            | 7942 | 7742 | 1.03 | 0.04 | -0.02 | -0.05 |
| YGR178C    | PBP1       | 5336 | 5202 | 1.03 | 0.04 | -0.02 | -0.05 |
| YPL248C    | GAL4       | 5876 | 5729 | 1.03 | 0.04 | -0.02 | -0.05 |
| YDL165W    | CDC36      | 1529 | 1491 | 1.03 | 0.04 | -0.02 | -0.05 |
| YPL271W    | ATP15      | 791  | 771  | 1.03 | 0.04 | -0.02 | -0.05 |
| YLL038C    | ENT4       | 989  | 965  | 1.03 | 0.04 | -0.02 | -0.05 |
| YOR364W    |            | 561  | 547  | 1.02 | 0.04 | -0.02 | -0.05 |
| YMR148W    |            | 1047 | 1022 | 1.02 | 0.04 | -0.02 | -0.05 |
| YPL043W    | NOP4       | 487  | 475  | 1.02 | 0.04 | -0.02 | -0.05 |
| YKLO45W    | PRI2       | 1099 | 1073 | 1.02 | 0.04 | -0.02 | -0.05 |
| YNL069C    | RPL16B     | 1110 | 1084 | 1.02 | 0.03 | -0.02 | -0.05 |
| YIRO25W    |            | 662  | 647  | 1.02 | 0.03 | -0.02 | -0.05 |
| YKR058W    | GLG1       | 1079 | 1054 | 1.02 | 0.03 | -0.02 | -0.05 |
| YJL087C    | TRL1       | 1356 | 1325 | 1.02 | 0.03 | -0.02 | -0.05 |
| YBR244W    | AMI1       | 2654 | 2594 | 1.02 | 0.03 | -0.02 | -0.06 |
| YAR061W    |            | 9263 | 9053 | 1.02 | 0.03 | -0.02 | -0.06 |
| YKR067W    |            | 1710 | 1671 | 1.02 | 0.03 | -0.02 | -0.06 |
| YOR114W    |            | 515  | 503  | 1.02 | 0.03 | -0.02 | -0.06 |
| YBL015W    | ACH1       | 1535 | 1501 | 1.02 | 0.03 | -0.02 | -0.06 |
| YOR310C    | NOP58      | 2265 | 2215 | 1.02 | 0.03 | -0.02 | -0.06 |
| YBR096W    |            | 1310 | 1281 | 1.02 | 0.03 | -0.02 | -0.06 |
| YKLCdelta2 | YKLCdelta2 | 1086 | 1062 | 1.02 | 0.03 | -0.02 | -0.06 |
| YOR309C    |            | 3124 | 3055 | 1.02 | 0.03 | -0.02 | -0.06 |

|             |             |      |      |      |      |       |       |
|-------------|-------------|------|------|------|------|-------|-------|
| YLL063C     | AYT1        | 2348 | 2296 | 1.02 | 0.03 | -0.02 | -0.06 |
| YJR064W     | CCT5        | 1723 | 1685 | 1.02 | 0.03 | -0.02 | -0.06 |
| YEL063C     | CAN1        | 3312 | 3239 | 1.02 | 0.03 | -0.02 | -0.06 |
| YJL186W     | MNN5        | 1728 | 1690 | 1.02 | 0.03 | -0.02 | -0.06 |
| YCR101C     |             | 3470 | 3395 | 1.02 | 0.03 | -0.02 | -0.06 |
| YDL175C     |             | 1662 | 1627 | 1.02 | 0.03 | -0.02 | -0.06 |
| YOR341W     | RPA190      | 6589 | 6449 | 1.02 | 0.03 | -0.03 | -0.06 |
| YAL014C     |             | 4198 | 4109 | 1.02 | 0.03 | -0.03 | -0.06 |
| YLR235C     |             | 1706 | 1670 | 1.02 | 0.03 | -0.03 | -0.06 |
| YNL250W     | RAD50       | 1574 | 1541 | 1.02 | 0.03 | -0.03 | -0.06 |
| YDL058W     | USO1        | 2056 | 2013 | 1.02 | 0.03 | -0.03 | -0.06 |
| YIL067C     |             | 998  | 977  | 1.02 | 0.03 | -0.03 | -0.06 |
| YML065W     | ORC1        | 3936 | 3855 | 1.02 | 0.03 | -0.03 | -0.06 |
| YML131W     |             | 1185 | 1161 | 1.02 | 0.03 | -0.03 | -0.06 |
| YDL134C-A   |             | 2043 | 2001 | 1.02 | 0.03 | -0.03 | -0.06 |
| YML062C     | MFT1        | 1613 | 1580 | 1.02 | 0.03 | -0.03 | -0.06 |
| YMR031C     |             | 2321 | 2274 | 1.02 | 0.03 | -0.03 | -0.06 |
| YKL221W     |             | 903  | 885  | 1.02 | 0.03 | -0.03 | -0.06 |
| YMRCdelta11 | YMRCdelta11 | 1650 | 1617 | 1.02 | 0.03 | -0.03 | -0.06 |
| YLR337C     | YLR337C     | 649  | 636  | 1.02 | 0.03 | -0.03 | -0.06 |
| YML127W     |             | 1231 | 1207 | 1.02 | 0.03 | -0.03 | -0.07 |
| YML035C     | AMD1        | 5343 | 5239 | 1.02 | 0.03 | -0.03 | -0.07 |
| YDL145C     | COP1        | 5347 | 5244 | 1.02 | 0.03 | -0.03 | -0.07 |
| YLR416C     |             | 1453 | 1425 | 1.02 | 0.03 | -0.03 | -0.07 |
| YMR276W     | DSK2        | 529  | 519  | 1.02 | 0.03 | -0.03 | -0.07 |
| YCR018C     | SRD1        | 2787 | 2734 | 1.02 | 0.03 | -0.03 | -0.07 |
| YAR064W     |             | 4363 | 4280 | 1.02 | 0.03 | -0.03 | -0.07 |
| YPR090W     |             | 1626 | 1596 | 1.02 | 0.03 | -0.03 | -0.07 |
| YOR085W     | OST3        | 1612 | 1582 | 1.02 | 0.03 | -0.03 | -0.07 |
| YDL085W     |             | 2182 | 2142 | 1.02 | 0.03 | -0.03 | -0.07 |
| YDL108W     | KIN28       | 1847 | 1813 | 1.02 | 0.03 | -0.03 | -0.07 |
| YIL075C     | RPN2        | 8394 | 8243 | 1.02 | 0.03 | -0.03 | -0.07 |
| YDR441C     | APT2        | 4353 | 4275 | 1.02 | 0.03 | -0.03 | -0.07 |
| YJR071W     |             | 1241 | 1219 | 1.02 | 0.03 | -0.03 | -0.07 |
| YGL025C     | PGD1        | 1452 | 1426 | 1.02 | 0.03 | -0.03 | -0.07 |
| YOR092W     | ECM3        | 889  | 873  | 1.02 | 0.03 | -0.03 | -0.07 |



|         |        |      |      |      |      |       |       |
|---------|--------|------|------|------|------|-------|-------|
| YGL257C | MNT2   | 1534 | 1507 | 1.02 | 0.03 | -0.03 | -0.07 |
| YCR026C |        | 2141 | 2103 | 1.02 | 0.03 | -0.03 | -0.07 |
| YLL047W |        | 3480 | 3419 | 1.02 | 0.03 | -0.03 | -0.07 |
| YHR155W |        | 842  | 827  | 1.02 | 0.03 | -0.03 | -0.07 |
| YER029C | SMB1   | 1600 | 1572 | 1.02 | 0.03 | -0.03 | -0.08 |
| YER003C | PMI40  | 2561 | 2517 | 1.02 | 0.02 | -0.03 | -0.08 |
| YFR040W | SAP155 | 5710 | 5613 | 1.02 | 0.02 | -0.03 | -0.08 |
| YIL094C | LYS12  | 960  | 944  | 1.02 | 0.02 | -0.03 | -0.08 |
| YDR266C |        | 1946 | 1913 | 1.02 | 0.02 | -0.03 | -0.08 |
| YCL076W |        | 2046 | 2012 | 1.02 | 0.02 | -0.03 | -0.08 |
| YDR346C |        | 5070 | 4985 | 1.02 | 0.02 | -0.03 | -0.08 |
| YNL311C |        | 2584 | 2541 | 1.02 | 0.02 | -0.03 | -0.08 |
| YPR058W | YMC1   | 843  | 829  | 1.02 | 0.02 | -0.03 | -0.08 |
| YBR301W |        | 5643 | 5551 | 1.02 | 0.02 | -0.03 | -0.08 |
| YGL130W | CEG1   | 2037 | 2004 | 1.02 | 0.02 | -0.03 | -0.08 |
| YMR289W |        | 2529 | 2489 | 1.02 | 0.02 | -0.03 | -0.08 |
| YGR145W |        | 1876 | 1846 | 1.02 | 0.02 | -0.03 | -0.08 |
| YIL056W |        | 2646 | 2604 | 1.02 | 0.02 | -0.03 | -0.08 |
| YJR041C |        | 1966 | 1936 | 1.02 | 0.02 | -0.03 | -0.08 |
| YNL287W | SEC21  | 6137 | 6042 | 1.02 | 0.02 | -0.03 | -0.08 |
| YIL166C |        | 1707 | 1681 | 1.02 | 0.02 | -0.03 | -0.08 |
| YCL033C |        | 5142 | 5064 | 1.02 | 0.02 | -0.03 | -0.08 |
| YKL127W | PGM1   | 5438 | 5355 | 1.02 | 0.02 | -0.03 | -0.08 |
| YDL153C | SAS10  | 4197 | 4134 | 1.02 | 0.02 | -0.03 | -0.08 |
| YLL007C |        | 1793 | 1767 | 1.01 | 0.02 | -0.03 | -0.08 |
| YGL022W | STT3   | 3395 | 3346 | 1.01 | 0.02 | -0.04 | -0.08 |
| YPR093C |        | 1143 | 1127 | 1.01 | 0.02 | -0.04 | -0.09 |
| YGR024C |        | 718  | 708  | 1.01 | 0.02 | -0.04 | -0.09 |
| YDL178W | AIP2   | 2322 | 2290 | 1.01 | 0.02 | -0.04 | -0.09 |
| YLR138W | NHA1   | 930  | 917  | 1.01 | 0.02 | -0.04 | -0.09 |
| YJR027W |        | 829  | 818  | 1.01 | 0.02 | -0.04 | -0.09 |
| YMR096W | SNZ1   | 2338 | 2306 | 1.01 | 0.02 | -0.04 | -0.09 |
| YLR142W | PUT1   | 1253 | 1236 | 1.01 | 0.02 | -0.04 | -0.09 |
| YGR105W | VMA21  | 2624 | 2588 | 1.01 | 0.02 | -0.04 | -0.09 |
| YGL232W |        | 1084 | 1069 | 1.01 | 0.02 | -0.04 | -0.09 |
| YDR482C |        | 4041 | 3986 | 1.01 | 0.02 | -0.04 | -0.09 |

|            |            |       |       |      |      |       |       |
|------------|------------|-------|-------|------|------|-------|-------|
| YNR052C    | POP2       | 3007  | 2966  | 1.01 | 0.02 | -0.04 | -0.09 |
| YJL079C    | PRY1       | 865   | 853   | 1.01 | 0.02 | -0.04 | -0.09 |
| YOR164C    |            | 597   | 589   | 1.01 | 0.02 | -0.04 | -0.09 |
| YBR201W    | DER1       | 1851  | 1827  | 1.01 | 0.02 | -0.04 | -0.09 |
| YIL142W    | CCT2       | 2601  | 2567  | 1.01 | 0.02 | -0.04 | -0.09 |
| YNL243W    | SLA2       | 3122  | 3082  | 1.01 | 0.02 | -0.04 | -0.09 |
| YCL024W    |            | 4010  | 3961  | 1.01 | 0.02 | -0.04 | -0.09 |
| YGL214W    |            | 1414  | 1397  | 1.01 | 0.02 | -0.04 | -0.09 |
| YMR019W    | STB4       | 2844  | 2810  | 1.01 | 0.02 | -0.04 | -0.09 |
| YOL160W    |            | 881   | 871   | 1.01 | 0.02 | -0.04 | -0.09 |
| YAR047C    |            | 2514  | 2484  | 1.01 | 0.02 | -0.04 | -0.09 |
| YLR277C    | YSH1       | 929   | 918   | 1.01 | 0.02 | -0.04 | -0.10 |
| YPR194C    |            | 2785  | 2753  | 1.01 | 0.02 | -0.04 | -0.10 |
| YNL009W    | IDP3       | 1610  | 1592  | 1.01 | 0.02 | -0.04 | -0.10 |
| YKL126W    | YPK1       | 1149  | 1136  | 1.01 | 0.02 | -0.04 | -0.10 |
| YHRCTy1-1B | YHRCTy1-1B | 5119  | 5062  | 1.01 | 0.02 | -0.04 | -0.10 |
| YCR025C    |            | 1000  | 989   | 1.01 | 0.02 | -0.04 | -0.10 |
| YPR067W    | ISA2       | 3758  | 3717  | 1.01 | 0.02 | -0.04 | -0.10 |
| YFR033C    | QCR6       | 2143  | 2120  | 1.01 | 0.02 | -0.04 | -0.10 |
| YMR306C-A  |            | 3492  | 3455  | 1.01 | 0.02 | -0.04 | -0.10 |
| YMR304W    | UBP15      | 757   | 749   | 1.01 | 0.01 | -0.04 | -0.10 |
| YBL056W    | PTC3       | 7128  | 7055  | 1.01 | 0.01 | -0.04 | -0.10 |
| YKR013W    | PRY2       | 874   | 866   | 1.01 | 0.01 | -0.04 | -0.10 |
| YDL118W    |            | 564   | 559   | 1.01 | 0.01 | -0.04 | -0.10 |
| YHR034C    |            | 2384  | 2362  | 1.01 | 0.01 | -0.04 | -0.10 |
| YKL032C    | IXR1       | 1510  | 1496  | 1.01 | 0.01 | -0.04 | -0.10 |
| YBLWTy2-1A | YBLWTy2-1A | 16228 | 16079 | 1.01 | 0.01 | -0.04 | -0.10 |
| YCR002C    | CDC10      | 3031  | 3003  | 1.01 | 0.01 | -0.04 | -0.10 |
| YFL019C    |            | 1012  | 1003  | 1.01 | 0.01 | -0.04 | -0.10 |
| YMR222C    |            | 2157  | 2137  | 1.01 | 0.01 | -0.04 | -0.10 |
| YJR013W    |            | 1568  | 1554  | 1.01 | 0.01 | -0.04 | -0.10 |
| YIL159W    | BNR1       | 2436  | 2415  | 1.01 | 0.01 | -0.04 | -0.11 |
| YCL028W    | RNQ1       | 4187  | 4151  | 1.01 | 0.01 | -0.04 | -0.11 |
| YNR068C    |            | 1177  | 1167  | 1.01 | 0.01 | -0.04 | -0.11 |
| YHR078W    |            | 706   | 700   | 1.01 | 0.01 | -0.04 | -0.11 |
| YPL103C    |            | 965   | 957   | 1.01 | 0.01 | -0.04 | -0.11 |

|            |            |      |      |      |      |       |       |
|------------|------------|------|------|------|------|-------|-------|
| YPL140C    | MKK2       | 1176 | 1166 | 1.01 | 0.01 | -0.04 | -0.11 |
| YNL122C    |            | 573  | 568  | 1.01 | 0.01 | -0.04 | -0.11 |
| YNR028W    | CPR8       | 1043 | 1034 | 1.01 | 0.01 | -0.04 | -0.11 |
| YLR106C    |            | 2272 | 2253 | 1.01 | 0.01 | -0.04 | -0.11 |
| YGL170C    |            | 2735 | 2713 | 1.01 | 0.01 | -0.04 | -0.11 |
| YGL168W    |            | 1120 | 1111 | 1.01 | 0.01 | -0.04 | -0.11 |
| YDR090C    |            | 1288 | 1278 | 1.01 | 0.01 | -0.04 | -0.11 |
| YPR159W    | KRE6       | 3748 | 3718 | 1.01 | 0.01 | -0.04 | -0.11 |
| YMR092C    | AIP1       | 3308 | 3282 | 1.01 | 0.01 | -0.04 | -0.11 |
| YKLCdelta4 | YKLCdelta4 | 1328 | 1318 | 1.01 | 0.01 | -0.04 | -0.11 |
| YLR379W    |            | 829  | 823  | 1.01 | 0.01 | -0.04 | -0.11 |
| YOL150C    |            | 432  | 429  | 1.01 | 0.01 | -0.05 | -0.11 |
| YLR149C    |            | 3557 | 3531 | 1.01 | 0.01 | -0.05 | -0.11 |
| YER074W    | RPS24A     | 3208 | 3184 | 1.01 | 0.01 | -0.05 | -0.11 |
| YOR126C    | IAH1       | 731  | 726  | 1.01 | 0.01 | -0.05 | -0.11 |
| YGL008C    | PMA1       | 7880 | 7823 | 1.01 | 0.01 | -0.05 | -0.11 |
| YER158C    |            | 809  | 803  | 1.01 | 0.01 | -0.05 | -0.11 |
| YIRO10W    |            | 2252 | 2236 | 1.01 | 0.01 | -0.05 | -0.11 |
| YIRO28W    | DAL4       | 557  | 553  | 1.01 | 0.01 | -0.05 | -0.11 |
| YGL146C    |            | 665  | 660  | 1.01 | 0.01 | -0.05 | -0.11 |
| YMR157C    |            | 2066 | 2052 | 1.01 | 0.01 | -0.05 | -0.11 |
| YPR066W    | UBA3       | 1127 | 1120 | 1.01 | 0.01 | -0.05 | -0.11 |
| YOR033C    | DHS1       | 1520 | 1510 | 1.01 | 0.01 | -0.05 | -0.11 |
| YDR194C    | MSS116     | 881  | 876  | 1.01 | 0.01 | -0.05 | -0.11 |
| YGR146C    |            | 6706 | 6665 | 1.01 | 0.01 | -0.05 | -0.11 |
| YIL040W    |            | 2355 | 2341 | 1.01 | 0.01 | -0.05 | -0.11 |
| YGR023W    | MTL1       | 1534 | 1525 | 1.01 | 0.01 | -0.05 | -0.11 |
| YKL005C    |            | 2609 | 2594 | 1.01 | 0.01 | -0.05 | -0.11 |
| YMR124W    |            | 2644 | 2629 | 1.01 | 0.01 | -0.05 | -0.12 |
| YLR178C    | TFS1       | 587  | 584  | 1.01 | 0.01 | -0.05 | -0.12 |
| YCL045C    |            | 2188 | 2176 | 1.01 | 0.01 | -0.05 | -0.12 |
| YBR068C    | BAP2       | 3065 | 3048 | 1.01 | 0.01 | -0.05 | -0.12 |
| YDR474C    |            | 3335 | 3317 | 1.01 | 0.01 | -0.05 | -0.12 |
| YGR173W    |            | 1326 | 1319 | 1.01 | 0.01 | -0.05 | -0.12 |
| YDL063C    |            | 1609 | 1601 | 1.01 | 0.01 | -0.05 | -0.12 |
| YDR259C    | YAP6       | 1603 | 1595 | 1.01 | 0.01 | -0.05 | -0.12 |

|           |        |      |      |      |      |       |       |
|-----------|--------|------|------|------|------|-------|-------|
| YMR309C   | NIP1   | 1804 | 1795 | 1.01 | 0.01 | -0.05 | -0.12 |
| YMR238W   | DFG5   | 886  | 882  | 1.00 | 0.01 | -0.05 | -0.12 |
| YLR365W   |        | 1145 | 1140 | 1.00 | 0.01 | -0.05 | -0.12 |
| YGL256W   | ADH4   | 2623 | 2611 | 1.00 | 0.01 | -0.05 | -0.12 |
| YJL180C   | ATP12  | 1372 | 1366 | 1.00 | 0.01 | -0.05 | -0.12 |
| YML106W   | URA5   | 2537 | 2526 | 1.00 | 0.01 | -0.05 | -0.12 |
| YML130C   | ERO1   | 1771 | 1764 | 1.00 | 0.01 | -0.05 | -0.12 |
| YGR057C   | LST7   | 4117 | 4100 | 1.00 | 0.01 | -0.05 | -0.12 |
| YJL024C   | APS3   | 1540 | 1534 | 1.00 | 0.01 | -0.05 | -0.12 |
| YBL031W   | SHE1   | 1039 | 1035 | 1.00 | 0.01 | -0.05 | -0.12 |
| YJR131W   | MNS1   | 1330 | 1325 | 1.00 | 0.00 | -0.05 | -0.12 |
| YKL129C   | MYO3   | 2571 | 2562 | 1.00 | 0.00 | -0.05 | -0.12 |
| YDL225W   | SHS1   | 1282 | 1278 | 1.00 | 0.00 | -0.05 | -0.12 |
| YDR310C   | SUM1   | 3800 | 3787 | 1.00 | 0.00 | -0.05 | -0.12 |
| YML074C   | NPI46  | 1702 | 1697 | 1.00 | 0.00 | -0.05 | -0.12 |
| YLR217W   |        | 829  | 827  | 1.00 | 0.00 | -0.05 | -0.13 |
| YOL077C   |        | 1285 | 1281 | 1.00 | 0.00 | -0.05 | -0.13 |
| YGR126W   |        | 1185 | 1182 | 1.00 | 0.00 | -0.05 | -0.13 |
| YLR458W   |        | 5237 | 5222 | 1.00 | 0.00 | -0.05 | -0.13 |
| YGL019W   | CKB1   | 2629 | 2622 | 1.00 | 0.00 | -0.05 | -0.13 |
| YDR023W   | SES1   | 1498 | 1494 | 1.00 | 0.00 | -0.05 | -0.13 |
| YPR174C   |        | 1672 | 1668 | 1.00 | 0.00 | -0.05 | -0.13 |
| YGR124W   | ASN2   | 6388 | 6373 | 1.00 | 0.00 | -0.05 | -0.13 |
| YIL003W   |        | 1886 | 1882 | 1.00 | 0.00 | -0.05 | -0.13 |
| YNL089C   |        | 512  | 511  | 1.00 | 0.00 | -0.05 | -0.13 |
| YIL133C   | RPL16A | 3461 | 3454 | 1.00 | 0.00 | -0.05 | -0.13 |
| YLR449W   | FPR4   | 5460 | 5451 | 1.00 | 0.00 | -0.05 | -0.13 |
| YLR020C   |        | 2521 | 2517 | 1.00 | 0.00 | -0.05 | -0.13 |
| YHR149C   |        | 1188 | 1186 | 1.00 | 0.00 | -0.05 | -0.13 |
| YLR244C   | MAP1   | 3084 | 3080 | 1.00 | 0.00 | -0.05 | -0.13 |
| YIL008W   |        | 2447 | 2444 | 1.00 | 0.00 | -0.05 | -0.13 |
| YPR031W   |        | 1625 | 1623 | 1.00 | 0.00 | -0.05 | -0.13 |
| YMR193C-A |        | 561  | 560  | 1.00 | 0.00 | -0.05 | -0.13 |
| YPL170W   |        | 2574 | 2572 | 1.00 | 0.00 | -0.05 | -0.13 |
| YCRO10C   |        | 340  | 340  | 1.00 | 0.00 | -0.06 | -0.13 |
| YHR069C   | RRP4   | 1908 | 1907 | 1.00 | 0.00 | -0.06 | -0.13 |

|           |          |      |      |      |       |       |       |
|-----------|----------|------|------|------|-------|-------|-------|
| YFR001W   |          | 1346 | 1346 | 1.00 | 0.00  | -0.06 | -0.13 |
| YML117W-A |          | 1299 | 1299 | 1.00 | 0.00  | -0.06 | -0.13 |
| YEL010W   |          | 1793 | 1793 | 1.00 | 0.00  | -0.06 | -0.14 |
| YJR020W   |          | 672  | 672  | 1.00 | 0.00  | -0.06 | -0.14 |
| YER108C   |          | 1377 | 1377 | 1.00 | 0.00  | -0.06 | -0.14 |
| YHR038W   | FIL1     | 4864 | 4865 | 1.00 | 0.00  | -0.06 | -0.14 |
| YDR541C   |          | 757  | 757  | 1.00 | 0.00  | -0.06 | -0.14 |
| YER151C   | UBP3     | 6707 | 6709 | 1.00 | 0.00  | -0.06 | -0.14 |
| YER185W   |          | 492  | 492  | 1.00 | 0.00  | -0.06 | -0.14 |
| YBR284W   |          | 536  | 537  | 1.00 | 0.00  | -0.06 | -0.14 |
| YMR241W   | YHM2     | 3132 | 3136 | 1.00 | 0.00  | -0.06 | -0.14 |
| YNL139C   | RLR1     | 930  | 931  | 1.00 | 0.00  | -0.06 | -0.14 |
| YBL070C   |          | 6375 | 6388 | 1.00 | 0.00  | -0.06 | -0.14 |
| YMRCtau1  | YMRCtau1 | 1742 | 1746 | 1.00 | 0.00  | -0.06 | -0.14 |
| YJL217W   |          | 670  | 671  | 1.00 | 0.00  | -0.06 | -0.14 |
| YDL082W   | RPL13A   | 6288 | 6302 | 1.00 | 0.00  | -0.06 | -0.14 |
| YER070W   | RNR1     | 5351 | 5363 | 1.00 | 0.00  | -0.06 | -0.14 |
| YDL187C   |          | 3331 | 3339 | 1.00 | 0.00  | -0.06 | -0.14 |
| YML048W   | GSF2     | 1833 | 1838 | 1.00 | 0.00  | -0.06 | -0.14 |
| YHR037W   | PUT2     | 3486 | 3496 | 1.00 | 0.00  | -0.06 | -0.15 |
| YDR200C   |          | 2010 | 2016 | 1.00 | 0.00  | -0.06 | -0.15 |
| YPR098C   |          | 1095 | 1098 | 1.00 | 0.00  | -0.06 | -0.15 |
| YBR119W   | MUD1     | 1653 | 1658 | 1.00 | 0.00  | -0.06 | -0.15 |
| YNL224C   |          | 1633 | 1639 | 1.00 | 0.00  | -0.06 | -0.15 |
| YBL087C   | RPL23A   | 3011 | 3022 | 1.00 | -0.01 | -0.06 | -0.15 |
| YCL061C   |          | 1497 | 1502 | 1.00 | -0.01 | -0.06 | -0.15 |
| YHR003C   |          | 1472 | 1478 | 1.00 | -0.01 | -0.06 | -0.15 |
| YLR397C   | AFG2     | 2792 | 2803 | 1.00 | -0.01 | -0.06 | -0.15 |
| YCL031C   | RRP7     | 1741 | 1748 | 1.00 | -0.01 | -0.06 | -0.15 |
| YOR261C   | RPN8     | 1639 | 1646 | 1.00 | -0.01 | -0.06 | -0.15 |
| YBR250W   |          | 943  | 947  | 1.00 | -0.01 | -0.06 | -0.15 |
| YHR084W   | STE12    | 1970 | 1978 | 1.00 | -0.01 | -0.06 | -0.15 |
| YCR091W   | KIN82    | 1600 | 1606 | 1.00 | -0.01 | -0.06 | -0.15 |
| YGL241W   | KAP114   | 769  | 772  | 1.00 | -0.01 | -0.06 | -0.15 |
| YML061C   | PIF1     | 1133 | 1138 | 1.00 | -0.01 | -0.06 | -0.15 |
| YPR096C   |          | 2361 | 2371 | 1.00 | -0.01 | -0.06 | -0.15 |

|         |        |      |      |      |       |       |       |
|---------|--------|------|------|------|-------|-------|-------|
| YPL130W | SPO19  | 8721 | 8757 | 1.00 | -0.01 | -0.06 | -0.15 |
| YLR354C | TAL1   | 2199 | 2209 | 1.00 | -0.01 | -0.06 | -0.15 |
| YOR021C |        | 1493 | 1500 | 1.00 | -0.01 | -0.06 | -0.15 |
| YDR219C |        | 1515 | 1522 | 1.00 | -0.01 | -0.06 | -0.15 |
| YLR260W | LCB5   | 3359 | 3375 | 1.00 | -0.01 | -0.06 | -0.15 |
| YGL077C | HNM1   | 1346 | 1353 | 1.00 | -0.01 | -0.06 | -0.15 |
| YDR207C | UME6   | 1983 | 1993 | 1.00 | -0.01 | -0.06 | -0.15 |
| YEL061C | CIN8   | 547  | 550  | 1.00 | -0.01 | -0.06 | -0.15 |
| YER079W |        | 558  | 561  | 1.00 | -0.01 | -0.06 | -0.15 |
| YBR294W | SUL1   | 1863 | 1873 | 0.99 | -0.01 | -0.06 | -0.15 |
| YPR112C | MRD1   | 5324 | 5353 | 0.99 | -0.01 | -0.06 | -0.15 |
| YOR326W | MYO2   | 2895 | 2911 | 0.99 | -0.01 | -0.06 | -0.15 |
| YNL318C | HXT14  | 840  | 845  | 0.99 | -0.01 | -0.06 | -0.15 |
| YDL162C |        | 1252 | 1259 | 0.99 | -0.01 | -0.06 | -0.15 |
| YGR202C | PCT1   | 4078 | 4101 | 0.99 | -0.01 | -0.06 | -0.16 |
| YEL029C |        | 2062 | 2074 | 0.99 | -0.01 | -0.06 | -0.16 |
| YER109C | FLO8   | 3709 | 3731 | 0.99 | -0.01 | -0.06 | -0.16 |
| YDL037C |        | 5219 | 5250 | 0.99 | -0.01 | -0.06 | -0.16 |
| YNL024C |        | 3216 | 3236 | 0.99 | -0.01 | -0.07 | -0.16 |
| YGR012W |        | 1339 | 1348 | 0.99 | -0.01 | -0.07 | -0.16 |
| YCR055C |        | 2573 | 2590 | 0.99 | -0.01 | -0.07 | -0.16 |
| YPL034W |        | 1156 | 1164 | 0.99 | -0.01 | -0.07 | -0.16 |
| YDL222C |        | 741  | 746  | 0.99 | -0.01 | -0.07 | -0.16 |
| YMR197C | VTI1   | 1989 | 2003 | 0.99 | -0.01 | -0.07 | -0.16 |
| YKR082W | NUP133 | 2304 | 2320 | 0.99 | -0.01 | -0.07 | -0.16 |
| YOR014W | RTS1   | 2781 | 2801 | 0.99 | -0.01 | -0.07 | -0.16 |
| YIL177C |        | 7643 | 7697 | 0.99 | -0.01 | -0.07 | -0.16 |
| YNL040W |        | 661  | 666  | 0.99 | -0.01 | -0.07 | -0.16 |
| YJL102W | MEF2   | 2423 | 2441 | 0.99 | -0.01 | -0.07 | -0.16 |
| YBR198C | TAF90  | 3401 | 3427 | 0.99 | -0.01 | -0.07 | -0.16 |
| YOR037W | CYC2   | 2734 | 2755 | 0.99 | -0.01 | -0.07 | -0.16 |
| YKL130C | SHE2   | 598  | 603  | 0.99 | -0.01 | -0.07 | -0.16 |
| YJL050W | MTR4   | 3969 | 4002 | 0.99 | -0.01 | -0.07 | -0.16 |
| YKL042W | SPC42  | 3201 | 3228 | 0.99 | -0.01 | -0.07 | -0.16 |
| YDR427W | RPN9   | 1074 | 1083 | 0.99 | -0.01 | -0.07 | -0.16 |
| YMR323W |        | 1408 | 1420 | 0.99 | -0.01 | -0.07 | -0.16 |

|           |        |       |       |      |       |       |       |
|-----------|--------|-------|-------|------|-------|-------|-------|
| YHR002W   |        | 3955  | 3988  | 0.99 | -0.01 | -0.07 | -0.16 |
| YHR039C-B |        | 2240  | 2259  | 0.99 | -0.01 | -0.07 | -0.16 |
| YFL036W   | RPO41  | 2502  | 2523  | 0.99 | -0.01 | -0.07 | -0.17 |
| YLR062C   |        | 1012  | 1021  | 0.99 | -0.01 | -0.07 | -0.17 |
| YPL219W   | PCL8   | 1338  | 1350  | 0.99 | -0.01 | -0.07 | -0.17 |
| YNR076W   | PAU6   | 2810  | 2836  | 0.99 | -0.01 | -0.07 | -0.17 |
| YAL060W   |        | 1390  | 1403  | 0.99 | -0.01 | -0.07 | -0.17 |
| YML119W   |        | 1024  | 1034  | 0.99 | -0.01 | -0.07 | -0.17 |
| YOR213C   | SAS5   | 1696  | 1713  | 0.99 | -0.01 | -0.07 | -0.17 |
| YBL042C   | FUI1   | 4829  | 4877  | 0.99 | -0.01 | -0.07 | -0.17 |
| YDL209C   |        | 2204  | 2226  | 0.99 | -0.01 | -0.07 | -0.17 |
| YLR205C   |        | 3998  | 4039  | 0.99 | -0.01 | -0.07 | -0.17 |
| YER173W   | RAD24  | 6709  | 6780  | 0.99 | -0.02 | -0.07 | -0.17 |
| YGR008C   | STF2   | 1067  | 1078  | 0.99 | -0.02 | -0.07 | -0.17 |
| YMR139W   | RIM11  | 1872  | 1892  | 0.99 | -0.02 | -0.07 | -0.17 |
| YLR269C   |        | 325   | 328   | 0.99 | -0.02 | -0.07 | -0.17 |
| YNL164C   |        | 871   | 880   | 0.99 | -0.02 | -0.07 | -0.17 |
| YJR133W   | XPT1   | 746   | 754   | 0.99 | -0.02 | -0.07 | -0.17 |
| YDR524C   |        | 1413  | 1429  | 0.99 | -0.02 | -0.07 | -0.17 |
| YHR116W   |        | 1477  | 1494  | 0.99 | -0.02 | -0.07 | -0.17 |
| YGR076C   | MRPL25 | 895   | 905   | 0.99 | -0.02 | -0.07 | -0.17 |
| YPL075W   | GCR1   | 1762  | 1782  | 0.99 | -0.02 | -0.07 | -0.18 |
| YCR103C   |        | 967   | 979   | 0.99 | -0.02 | -0.07 | -0.18 |
| YFL023W   |        | 2778  | 2811  | 0.99 | -0.02 | -0.07 | -0.18 |
| YLR187W   |        | 2492  | 2522  | 0.99 | -0.02 | -0.07 | -0.18 |
| YLL067C   |        | 12923 | 13080 | 0.99 | -0.02 | -0.07 | -0.18 |
| YNL235C   |        | 929   | 940   | 0.99 | -0.02 | -0.07 | -0.18 |
| YGL139W   |        | 4640  | 4697  | 0.99 | -0.02 | -0.07 | -0.18 |
| YMR113W   |        | 627   | 635   | 0.99 | -0.02 | -0.07 | -0.18 |
| YCR082W   |        | 2299  | 2328  | 0.99 | -0.02 | -0.07 | -0.18 |
| YDR058C   | TGL2   | 1286  | 1302  | 0.99 | -0.02 | -0.07 | -0.18 |
| YPL146C   |        | 4183  | 4236  | 0.99 | -0.02 | -0.07 | -0.18 |
| YMR299C   |        | 2136  | 2163  | 0.99 | -0.02 | -0.07 | -0.18 |
| YMR228W   | MTF1   | 610   | 618   | 0.99 | -0.02 | -0.07 | -0.18 |
| YHL024W   | NOS1   | 363   | 368   | 0.99 | -0.02 | -0.07 | -0.18 |
| YPL089C   | RLM1   | 3959  | 4012  | 0.99 | -0.02 | -0.08 | -0.18 |

|            |            |       |       |      |       |       |       |
|------------|------------|-------|-------|------|-------|-------|-------|
| YMR063W    | RIM9       | 2005  | 2032  | 0.99 | -0.02 | -0.08 | -0.18 |
| YGL152C    |            | 954   | 967   | 0.99 | -0.02 | -0.08 | -0.18 |
| YHR200W    | RPN10      | 2094  | 2122  | 0.99 | -0.02 | -0.08 | -0.18 |
| YPL210C    | SRP72      | 3332  | 3378  | 0.99 | -0.02 | -0.08 | -0.18 |
| YDL163W    |            | 5305  | 5379  | 0.99 | -0.02 | -0.08 | -0.18 |
| YJR113C    |            | 1945  | 1972  | 0.99 | -0.02 | -0.08 | -0.18 |
| YIR033W    | MGA2       | 2682  | 2720  | 0.99 | -0.02 | -0.08 | -0.18 |
| YKR016W    |            | 1374  | 1394  | 0.99 | -0.02 | -0.08 | -0.19 |
| YHRWtau3   | YHRWtau3   | 1660  | 1684  | 0.99 | -0.02 | -0.08 | -0.19 |
| YER060W    | FCY21      | 1960  | 1989  | 0.99 | -0.02 | -0.08 | -0.19 |
| YJL098W    | SAP185     | 3149  | 3196  | 0.99 | -0.02 | -0.08 | -0.19 |
| YMR163C    |            | 677   | 687   | 0.99 | -0.02 | -0.08 | -0.19 |
| YLR210W    | CLB4       | 693   | 703   | 0.99 | -0.02 | -0.08 | -0.19 |
| YGL142C    | GPI10      | 2164  | 2197  | 0.98 | -0.02 | -0.08 | -0.19 |
| YDL074C    |            | 929   | 943   | 0.98 | -0.02 | -0.08 | -0.19 |
| YOL002C    |            | 401   | 407   | 0.98 | -0.02 | -0.08 | -0.19 |
| YPL108W    |            | 728   | 739   | 0.98 | -0.02 | -0.08 | -0.19 |
| YMR014W    |            | 8009  | 8136  | 0.98 | -0.02 | -0.08 | -0.19 |
| YBR162C    |            | 9778  | 9935  | 0.98 | -0.02 | -0.08 | -0.19 |
| YLL031C    |            | 3063  | 3113  | 0.98 | -0.02 | -0.08 | -0.19 |
| YBR084W    | MIS1       | 4173  | 4242  | 0.98 | -0.02 | -0.08 | -0.19 |
| YOR316C    | COT1       | 1833  | 1864  | 0.98 | -0.02 | -0.08 | -0.19 |
| YKL016C    | ATP7       | 1068  | 1086  | 0.98 | -0.02 | -0.08 | -0.19 |
| YLL016W    | SDC25      | 1212  | 1233  | 0.98 | -0.02 | -0.08 | -0.20 |
| YDR156W    | RPA14      | 1170  | 1190  | 0.98 | -0.02 | -0.08 | -0.20 |
| YDR527W    |            | 10901 | 11092 | 0.98 | -0.03 | -0.08 | -0.20 |
| YHRCdelta5 | YHRCdelta5 | 631   | 642   | 0.98 | -0.03 | -0.08 | -0.20 |
| YBL028C    |            | 4776  | 4860  | 0.98 | -0.03 | -0.08 | -0.20 |
| YNL271C    | BNI1       | 2428  | 2471  | 0.98 | -0.03 | -0.08 | -0.20 |
| YOL011W    | PLB3       | 2605  | 2651  | 0.98 | -0.03 | -0.08 | -0.20 |
| YCR085W    |            | 10435 | 10623 | 0.98 | -0.03 | -0.08 | -0.20 |
| YLR047C    |            | 3453  | 3516  | 0.98 | -0.03 | -0.08 | -0.20 |
| YHL041W    |            | 2921  | 2974  | 0.98 | -0.03 | -0.08 | -0.20 |
| YPR045C    |            | 2032  | 2069  | 0.98 | -0.03 | -0.08 | -0.20 |
| YJL080C    | SCP160     | 2690  | 2740  | 0.98 | -0.03 | -0.08 | -0.20 |
| YER156C    |            | 1729  | 1761  | 0.98 | -0.03 | -0.08 | -0.20 |



|            |            |       |       |      |       |       |       |
|------------|------------|-------|-------|------|-------|-------|-------|
| YJR088C    |            | 2158  | 2198  | 0.98 | -0.03 | -0.08 | -0.20 |
| YML038C    | YMD8       | 2361  | 2406  | 0.98 | -0.03 | -0.08 | -0.20 |
| YDRCTy1-2B | YDRCTy1-2B | 20412 | 20809 | 0.98 | -0.03 | -0.08 | -0.20 |
| YNR060W    | FRE4       | 1343  | 1369  | 0.98 | -0.03 | -0.08 | -0.20 |
| YHR045W    |            | 392   | 400   | 0.98 | -0.03 | -0.08 | -0.20 |
| YJL034W    | KAR2       | 7040  | 7178  | 0.98 | -0.03 | -0.08 | -0.20 |
| YKR049C    |            | 1527  | 1557  | 0.98 | -0.03 | -0.08 | -0.20 |
| YDR477W    | SNF1       | 1779  | 1814  | 0.98 | -0.03 | -0.08 | -0.20 |
| YLR262C-A  | YLR262C-A  | 948   | 967   | 0.98 | -0.03 | -0.08 | -0.20 |
| YLR122C    |            | 613   | 625   | 0.98 | -0.03 | -0.08 | -0.20 |
| YER153C    | PET122     | 1333  | 1360  | 0.98 | -0.03 | -0.08 | -0.21 |
| YKR098C    | UBP11      | 1848  | 1885  | 0.98 | -0.03 | -0.08 | -0.21 |
| YOL148C    | SPT20      | 2362  | 2410  | 0.98 | -0.03 | -0.08 | -0.21 |
| YPL269W    | KAR9       | 1338  | 1365  | 0.98 | -0.03 | -0.08 | -0.21 |
| YBL046W    |            | 4257  | 4345  | 0.98 | -0.03 | -0.09 | -0.21 |
| YPL150W    |            | 4122  | 4208  | 0.98 | -0.03 | -0.09 | -0.21 |
| YDR057W    |            | 7713  | 7876  | 0.98 | -0.03 | -0.09 | -0.21 |
| YGR029W    | ERV1       | 1633  | 1668  | 0.98 | -0.03 | -0.09 | -0.21 |
| YJL107C    |            | 896   | 915   | 0.98 | -0.03 | -0.09 | -0.21 |
| YOR099W    | KTR1       | 1437  | 1468  | 0.98 | -0.03 | -0.09 | -0.21 |
| YGL018C    | JAC1       | 1017  | 1039  | 0.98 | -0.03 | -0.09 | -0.21 |
| YHR147C    | MRPL6      | 4365  | 4460  | 0.98 | -0.03 | -0.09 | -0.21 |
| YOLWtau1   | YOLWtau1   | 567   | 579   | 0.98 | -0.03 | -0.09 | -0.21 |
| YLR291C    | GCD7       | 2888  | 2951  | 0.98 | -0.03 | -0.09 | -0.21 |
| YOL114C    |            | 1862  | 1903  | 0.98 | -0.03 | -0.09 | -0.21 |
| YIL072W    | HOP1       | 2020  | 2064  | 0.98 | -0.03 | -0.09 | -0.21 |
| YGL087C    | MMS2       | 1407  | 1438  | 0.98 | -0.03 | -0.09 | -0.21 |
| YLL059C    |            | 2023  | 2068  | 0.98 | -0.03 | -0.09 | -0.21 |
| YDR503C    | LPP1       | 1589  | 1624  | 0.98 | -0.03 | -0.09 | -0.21 |
| YLR116W    | MSL5       | 1807  | 1847  | 0.98 | -0.03 | -0.09 | -0.21 |
| YDR420W    | HKR1       | 11111 | 11360 | 0.98 | -0.03 | -0.09 | -0.21 |
| YPL186C    |            | 1165  | 1191  | 0.98 | -0.03 | -0.09 | -0.21 |
| YER075C    | PTP3       | 2115  | 2163  | 0.98 | -0.03 | -0.09 | -0.21 |
| YPR072W    | NOT5       | 6324  | 6468  | 0.98 | -0.03 | -0.09 | -0.21 |
| YOR391C    |            | 487   | 498   | 0.98 | -0.03 | -0.09 | -0.22 |
| YDR358W    |            | 1034  | 1058  | 0.98 | -0.03 | -0.09 | -0.22 |

|         |        |      |      |      |       |       |       |
|---------|--------|------|------|------|-------|-------|-------|
| YLR030W |        | 942  | 964  | 0.98 | -0.03 | -0.09 | -0.22 |
| YDR450W | RPS18A | 2720 | 2783 | 0.98 | -0.03 | -0.09 | -0.22 |
| YCR051W |        | 2292 | 2346 | 0.98 | -0.03 | -0.09 | -0.22 |
| YGR244C | LSC2   | 4984 | 5101 | 0.98 | -0.03 | -0.09 | -0.22 |
| YBL075C | SSA3   | 1816 | 1859 | 0.98 | -0.03 | -0.09 | -0.22 |
| YKL050C |        | 3021 | 3093 | 0.98 | -0.03 | -0.09 | -0.22 |
| YDR401W |        | 454  | 465  | 0.98 | -0.03 | -0.09 | -0.22 |
| YGL026C | TRP5   | 2854 | 2923 | 0.98 | -0.03 | -0.09 | -0.22 |
| YMR212C |        | 1078 | 1104 | 0.98 | -0.03 | -0.09 | -0.22 |
| YDL099W |        | 1652 | 1692 | 0.98 | -0.03 | -0.09 | -0.22 |
| YCL013W |        | 4027 | 4126 | 0.98 | -0.03 | -0.09 | -0.22 |
| YFR050C | PRE4   | 4357 | 4464 | 0.98 | -0.04 | -0.09 | -0.22 |
| YPL242C | IQG1   | 2900 | 2972 | 0.98 | -0.04 | -0.09 | -0.22 |
| YDR126W |        | 467  | 479  | 0.98 | -0.04 | -0.09 | -0.22 |
| YOL085C |        | 482  | 494  | 0.98 | -0.04 | -0.09 | -0.22 |
| YAL015C | NTG1   | 1454 | 1491 | 0.98 | -0.04 | -0.09 | -0.22 |
| YGL216W | KIP3   | 2367 | 2428 | 0.97 | -0.04 | -0.09 | -0.22 |
| YPL166W |        | 1842 | 1889 | 0.97 | -0.04 | -0.09 | -0.22 |
| YDL008W | APC11  | 3155 | 3237 | 0.97 | -0.04 | -0.09 | -0.22 |
| YKL113C | RAD27  | 1418 | 1455 | 0.97 | -0.04 | -0.09 | -0.23 |
| YLL064C |        | 459  | 471  | 0.97 | -0.04 | -0.09 | -0.23 |
| YHR212C |        | 1778 | 1825 | 0.97 | -0.04 | -0.09 | -0.23 |
| YIL057C |        | 1109 | 1139 | 0.97 | -0.04 | -0.09 | -0.23 |
| YMR218C | TRS130 | 671  | 689  | 0.97 | -0.04 | -0.09 | -0.23 |
| YLL062C |        | 1366 | 1403 | 0.97 | -0.04 | -0.09 | -0.23 |
| YLR403W | SFP1   | 2178 | 2238 | 0.97 | -0.04 | -0.10 | -0.23 |
| YDR375C | BCS1   | 1333 | 1370 | 0.97 | -0.04 | -0.10 | -0.23 |
| YKL027W |        | 1120 | 1151 | 0.97 | -0.04 | -0.10 | -0.23 |
| YPL231W | FAS2   | 3871 | 3979 | 0.97 | -0.04 | -0.10 | -0.23 |
| YOR120W | GCY1   | 619  | 636  | 0.97 | -0.04 | -0.10 | -0.23 |
| YDR247W |        | 1302 | 1338 | 0.97 | -0.04 | -0.10 | -0.23 |
| YCL058C |        | 2097 | 2156 | 0.97 | -0.04 | -0.10 | -0.23 |
| YDR158W | HOM2   | 4726 | 4860 | 0.97 | -0.04 | -0.10 | -0.23 |
| YKR093W | PTR2   | 1807 | 1858 | 0.97 | -0.04 | -0.10 | -0.23 |
| YDR483W | KRE2   | 3240 | 3333 | 0.97 | -0.04 | -0.10 | -0.23 |
| YDR122W | KIN1   | 1509 | 1552 | 0.97 | -0.04 | -0.10 | -0.23 |

|         |        |      |      |      |       |       |       |
|---------|--------|------|------|------|-------|-------|-------|
| YJL054W | TIM54  | 2896 | 2980 | 0.97 | -0.04 | -0.10 | -0.23 |
| YDR223W |        | 1103 | 1135 | 0.97 | -0.04 | -0.10 | -0.23 |
| YPR129W | SCD6   | 2516 | 2589 | 0.97 | -0.04 | -0.10 | -0.23 |
| YOR040W | GLO4   | 2635 | 2712 | 0.97 | -0.04 | -0.10 | -0.24 |
| YBR107C | MCM19  | 334  | 344  | 0.97 | -0.04 | -0.10 | -0.24 |
| YOR116C | RPO31  | 889  | 915  | 0.97 | -0.04 | -0.10 | -0.24 |
| YDR386W | MUS81  | 624  | 642  | 0.97 | -0.04 | -0.10 | -0.24 |
| YFR032C |        | 1333 | 1373 | 0.97 | -0.04 | -0.10 | -0.24 |
| YMR072W | ABF2   | 637  | 656  | 0.97 | -0.04 | -0.10 | -0.24 |
| YJL056C | ZAP1   | 2183 | 2249 | 0.97 | -0.04 | -0.10 | -0.24 |
| YGL235W |        | 2094 | 2157 | 0.97 | -0.04 | -0.10 | -0.24 |
| YOR118W |        | 1735 | 1788 | 0.97 | -0.04 | -0.10 | -0.24 |
| YBL013W |        | 1925 | 1984 | 0.97 | -0.04 | -0.10 | -0.24 |
| YDL184C | RPL41A | 3962 | 4083 | 0.97 | -0.04 | -0.10 | -0.24 |
| YAR068W |        | 2813 | 2899 | 0.97 | -0.04 | -0.10 | -0.24 |
| YGR172C | YIP1   | 1338 | 1379 | 0.97 | -0.04 | -0.10 | -0.24 |
| YLR203C | MSS51  | 1723 | 1776 | 0.97 | -0.04 | -0.10 | -0.24 |
| YER105C | NUP157 | 5896 | 6077 | 0.97 | -0.04 | -0.10 | -0.24 |
| YDL098C | SNU23  | 3996 | 4119 | 0.97 | -0.04 | -0.10 | -0.24 |
| YDR160W | SSY1   | 1024 | 1056 | 0.97 | -0.04 | -0.10 | -0.24 |
| YJL116C | NCA3   | 570  | 588  | 0.97 | -0.04 | -0.10 | -0.24 |
| YER031C | YPT31  | 2534 | 2613 | 0.97 | -0.04 | -0.10 | -0.24 |
| YNL144C |        | 1613 | 1663 | 0.97 | -0.04 | -0.10 | -0.24 |
| YLR006C | SSK1   | 1729 | 1783 | 0.97 | -0.04 | -0.10 | -0.24 |
| YKL094W | YJU3   | 1103 | 1138 | 0.97 | -0.04 | -0.10 | -0.24 |
| YPR097W |        | 2988 | 3083 | 0.97 | -0.04 | -0.10 | -0.24 |
| YMR033W | ARP9   | 1336 | 1378 | 0.97 | -0.05 | -0.10 | -0.24 |
| YDR468C | TLG1   | 2189 | 2259 | 0.97 | -0.05 | -0.10 | -0.24 |
| YNL059C | ARP5   | 2669 | 2754 | 0.97 | -0.05 | -0.10 | -0.25 |
| YLR066W | SPC3   | 800  | 826  | 0.97 | -0.05 | -0.10 | -0.25 |
| YGL107C |        | 4375 | 4516 | 0.97 | -0.05 | -0.10 | -0.25 |
| YLR113W | HOG1   | 2008 | 2073 | 0.97 | -0.05 | -0.10 | -0.25 |
| YEL077C |        | 6134 | 6335 | 0.97 | -0.05 | -0.10 | -0.25 |
| YIR003W |        | 2131 | 2201 | 0.97 | -0.05 | -0.10 | -0.25 |
| YBR185C | MBA1   | 5882 | 6076 | 0.97 | -0.05 | -0.10 | -0.25 |
| YDR342C | HXT7   | 3069 | 3171 | 0.97 | -0.05 | -0.10 | -0.25 |

|         |        |      |      |      |       |       |       |
|---------|--------|------|------|------|-------|-------|-------|
| YFL010C |        | 1717 | 1774 | 0.97 | -0.05 | -0.10 | -0.25 |
| YBR199W | KTR4   | 2211 | 2285 | 0.97 | -0.05 | -0.10 | -0.25 |
| YHR064C | PDR13  | 1084 | 1120 | 0.97 | -0.05 | -0.10 | -0.25 |
| YPR140W |        | 1281 | 1324 | 0.97 | -0.05 | -0.10 | -0.25 |
| YMR294W | JNM1   | 495  | 512  | 0.97 | -0.05 | -0.10 | -0.25 |
| YBR224W |        | 2640 | 2729 | 0.97 | -0.05 | -0.10 | -0.25 |
| YOR294W | RRS1   | 1428 | 1476 | 0.97 | -0.05 | -0.10 | -0.25 |
| YNL259C | ATX1   | 4955 | 5123 | 0.97 | -0.05 | -0.10 | -0.25 |
| YKR011C |        | 475  | 491  | 0.97 | -0.05 | -0.10 | -0.25 |
| YDR424C | DYN2   | 5552 | 5743 | 0.97 | -0.05 | -0.10 | -0.25 |
| YLR175W | CBF5   | 6111 | 6324 | 0.97 | -0.05 | -0.11 | -0.25 |
| YBR163W | DEM1   | 6522 | 6750 | 0.97 | -0.05 | -0.11 | -0.26 |
| YDL124W |        | 1577 | 1632 | 0.97 | -0.05 | -0.11 | -0.26 |
| YLL041C | SDH2   | 1346 | 1394 | 0.97 | -0.05 | -0.11 | -0.26 |
| YKL067W | YNK1   | 1064 | 1102 | 0.97 | -0.05 | -0.11 | -0.26 |
| YDL126C | CDC48  | 7300 | 7560 | 0.97 | -0.05 | -0.11 | -0.26 |
| YNL334C | SNO2   | 929  | 962  | 0.97 | -0.05 | -0.11 | -0.26 |
| YER086W | ILV1   | 3031 | 3140 | 0.97 | -0.05 | -0.11 | -0.26 |
| YGL179C |        | 666  | 690  | 0.97 | -0.05 | -0.11 | -0.26 |
| YAL016W | TPD3   | 3470 | 3596 | 0.97 | -0.05 | -0.11 | -0.26 |
| YFL056C | AAD6   | 3021 | 3131 | 0.96 | -0.05 | -0.11 | -0.26 |
| YDR296W | MHR1   | 670  | 694  | 0.96 | -0.05 | -0.11 | -0.26 |
| YDR067C |        | 4733 | 4906 | 0.96 | -0.05 | -0.11 | -0.26 |
| YLR050C |        | 598  | 620  | 0.96 | -0.05 | -0.11 | -0.26 |
| YFL042C |        | 1528 | 1584 | 0.96 | -0.05 | -0.11 | -0.26 |
| YLR026C | SED5   | 1076 | 1116 | 0.96 | -0.05 | -0.11 | -0.26 |
| YJL016W |        | 389  | 403  | 0.96 | -0.05 | -0.11 | -0.26 |
| YLR225C |        | 1161 | 1204 | 0.96 | -0.05 | -0.11 | -0.26 |
| YMR115W |        | 805  | 835  | 0.96 | -0.05 | -0.11 | -0.26 |
| YDL112W | TRM3   | 6602 | 6846 | 0.96 | -0.05 | -0.11 | -0.26 |
| YGR262C |        | 682  | 707  | 0.96 | -0.05 | -0.11 | -0.26 |
| YPR052C | NHP6A  | 1036 | 1075 | 0.96 | -0.05 | -0.11 | -0.26 |
| YCL026C |        | 2096 | 2174 | 0.96 | -0.05 | -0.11 | -0.26 |
| YMR058W | FET3   | 3079 | 3194 | 0.96 | -0.05 | -0.11 | -0.26 |
| YDR451C |        | 2988 | 3101 | 0.96 | -0.05 | -0.11 | -0.26 |
| YPL174C | NIP100 | 2657 | 2757 | 0.96 | -0.05 | -0.11 | -0.26 |

|             |             |      |      |      |       |       |       |
|-------------|-------------|------|------|------|-------|-------|-------|
| YMR043W     | MCM1        | 3363 | 3490 | 0.96 | -0.05 | -0.11 | -0.27 |
| YIL058W     |             | 3175 | 3296 | 0.96 | -0.05 | -0.11 | -0.27 |
| YBL062W     |             | 5627 | 5842 | 0.96 | -0.05 | -0.11 | -0.27 |
| YDR334W     | SWR1        | 6954 | 7220 | 0.96 | -0.05 | -0.11 | -0.27 |
| YIRCdelta6  | YIRCdelta6  | 897  | 932  | 0.96 | -0.05 | -0.11 | -0.27 |
| YDR276C     |             | 2630 | 2732 | 0.96 | -0.05 | -0.11 | -0.27 |
| YKR034W     | DAL80       | 1905 | 1979 | 0.96 | -0.06 | -0.11 | -0.27 |
| YCL055W     | KAR4        | 1920 | 1996 | 0.96 | -0.06 | -0.11 | -0.27 |
| YJL179W     | PFD1        | 627  | 652  | 0.96 | -0.06 | -0.11 | -0.27 |
| YPL215W     | CBP3        | 958  | 996  | 0.96 | -0.06 | -0.11 | -0.27 |
| YJL148W     | RPA34       | 2037 | 2118 | 0.96 | -0.06 | -0.11 | -0.27 |
| YGL054C     | ERV14       | 2470 | 2569 | 0.96 | -0.06 | -0.11 | -0.27 |
| YBR184W     |             | 1741 | 1811 | 0.96 | -0.06 | -0.11 | -0.27 |
| YOR119C     | RIO1        | 2917 | 3034 | 0.96 | -0.06 | -0.11 | -0.27 |
| YML129C     | COX14       | 957  | 995  | 0.96 | -0.06 | -0.11 | -0.27 |
| YAL042W     | FUN9        | 2603 | 2708 | 0.96 | -0.06 | -0.11 | -0.27 |
| YLR176C     | RFX1        | 630  | 655  | 0.96 | -0.06 | -0.11 | -0.27 |
| YPRO75C     | OPY2        | 1949 | 2028 | 0.96 | -0.06 | -0.11 | -0.27 |
| YPL203W     | PKA3        | 1137 | 1183 | 0.96 | -0.06 | -0.11 | -0.27 |
| YFLCdelta6  | YFLCdelta6  | 2209 | 2298 | 0.96 | -0.06 | -0.11 | -0.27 |
| YER155C     | BEM2        | 2745 | 2857 | 0.96 | -0.06 | -0.11 | -0.27 |
| YLR355C     | ILV5        | 5905 | 6147 | 0.96 | -0.06 | -0.11 | -0.28 |
| YJRWdelta20 | YJRWdelta20 | 1297 | 1350 | 0.96 | -0.06 | -0.11 | -0.28 |
| YNL289W     | PCL1        | 316  | 329  | 0.96 | -0.06 | -0.11 | -0.28 |
| YMR076C     | PDS5        | 2745 | 2858 | 0.96 | -0.06 | -0.11 | -0.28 |
| YMR012W     | CLU1        | 1937 | 2018 | 0.96 | -0.06 | -0.11 | -0.28 |
| YLR422W     |             | 5468 | 5696 | 0.96 | -0.06 | -0.12 | -0.28 |
| YMR002W     |             | 1600 | 1668 | 0.96 | -0.06 | -0.12 | -0.28 |
| YPR193C     | HPA2        | 4102 | 4278 | 0.96 | -0.06 | -0.12 | -0.28 |
| YKL157W     | APE2        | 5910 | 6164 | 0.96 | -0.06 | -0.12 | -0.28 |
| YOL035C     |             | 1344 | 1402 | 0.96 | -0.06 | -0.12 | -0.28 |
| YNL297C     |             | 6209 | 6477 | 0.96 | -0.06 | -0.12 | -0.28 |
| YGL115W     | SNF4        | 2010 | 2097 | 0.96 | -0.06 | -0.12 | -0.28 |
| YCR029C     |             | 1159 | 1209 | 0.96 | -0.06 | -0.12 | -0.28 |
| YLL022C     | HIF1        | 1011 | 1055 | 0.96 | -0.06 | -0.12 | -0.28 |
| YNL153C     | GIM3        | 2594 | 2707 | 0.96 | -0.06 | -0.12 | -0.28 |

|            |            |      |      |      |       |       |       |
|------------|------------|------|------|------|-------|-------|-------|
| YGL072C    |            | 1446 | 1509 | 0.96 | -0.06 | -0.12 | -0.28 |
| YIL130W    |            | 3702 | 3864 | 0.96 | -0.06 | -0.12 | -0.29 |
| YOR379C    |            | 1825 | 1905 | 0.96 | -0.06 | -0.12 | -0.29 |
| YCL012W    |            | 6876 | 7179 | 0.96 | -0.06 | -0.12 | -0.29 |
| YER167W    | BCK2       | 6978 | 7286 | 0.96 | -0.06 | -0.12 | -0.29 |
| YOR215C    |            | 1814 | 1894 | 0.96 | -0.06 | -0.12 | -0.29 |
| YGL132W    |            | 815  | 851  | 0.96 | -0.06 | -0.12 | -0.29 |
| YGR025W    |            | 4338 | 4532 | 0.96 | -0.06 | -0.12 | -0.29 |
| YDL095W    | PMT1       | 3140 | 3280 | 0.96 | -0.06 | -0.12 | -0.29 |
| YIL163C    |            | 804  | 840  | 0.96 | -0.06 | -0.12 | -0.29 |
| YBR291C    | CTP1       | 1964 | 2052 | 0.96 | -0.06 | -0.12 | -0.29 |
| YIL044C    |            | 753  | 787  | 0.96 | -0.06 | -0.12 | -0.29 |
| YNL226W    |            | 867  | 906  | 0.96 | -0.06 | -0.12 | -0.29 |
| YCR089W    | FIG2       | 3666 | 3832 | 0.96 | -0.06 | -0.12 | -0.29 |
| YER089C    | PTC2       | 2400 | 2509 | 0.96 | -0.06 | -0.12 | -0.29 |
| YBL052C    | SAS3       | 5196 | 5433 | 0.96 | -0.06 | -0.12 | -0.29 |
| YPL208W    |            | 1018 | 1065 | 0.96 | -0.06 | -0.12 | -0.29 |
| YNL315C    | ATP11      | 1780 | 1862 | 0.96 | -0.07 | -0.12 | -0.29 |
| YGL127C    | SOH1       | 3711 | 3883 | 0.96 | -0.07 | -0.12 | -0.29 |
| YBR093C    | PHO5       | 481  | 503  | 0.96 | -0.07 | -0.12 | -0.29 |
| YNL313C    |            | 4971 | 5202 | 0.96 | -0.07 | -0.12 | -0.29 |
| YER157W    | SEC34      | 3180 | 3328 | 0.96 | -0.07 | -0.12 | -0.29 |
| YFLWdelta1 | YFLWdelta1 | 765  | 801  | 0.96 | -0.07 | -0.12 | -0.29 |
| YLR323C    |            | 2194 | 2297 | 0.96 | -0.07 | -0.12 | -0.30 |
| YJR128W    |            | 615  | 644  | 0.96 | -0.07 | -0.12 | -0.30 |
| YDR260C    | SWM1       | 3807 | 3987 | 0.95 | -0.07 | -0.12 | -0.30 |
| YKR095W    | MLP1       | 4881 | 5112 | 0.95 | -0.07 | -0.12 | -0.30 |
| YOR365C    |            | 379  | 397  | 0.95 | -0.07 | -0.12 | -0.30 |
| YER038C    |            | 1650 | 1729 | 0.95 | -0.07 | -0.12 | -0.30 |
| YDL013W    | HEX3       | 2783 | 2916 | 0.95 | -0.07 | -0.12 | -0.30 |
| YOR209C    | NPT1       | 3870 | 4056 | 0.95 | -0.07 | -0.12 | -0.30 |
| YBL063W    | KIP1       | 5107 | 5354 | 0.95 | -0.07 | -0.12 | -0.30 |
| YMR172W    | HOT1       | 3245 | 3402 | 0.95 | -0.07 | -0.12 | -0.30 |
| YGR256W    | GND2       | 1836 | 1925 | 0.95 | -0.07 | -0.12 | -0.30 |
| YLR002C    |            | 2899 | 3040 | 0.95 | -0.07 | -0.12 | -0.30 |
| YFLO13C    |            | 2705 | 2837 | 0.95 | -0.07 | -0.12 | -0.30 |

|            |            |      |      |      |       |       |       |
|------------|------------|------|------|------|-------|-------|-------|
| YLL019C    | KNS1       | 3312 | 3474 | 0.95 | -0.07 | -0.13 | -0.30 |
| YHR096C    | HXT5       | 4067 | 4267 | 0.95 | -0.07 | -0.13 | -0.30 |
| YMR230W    | RPS10B     | 923  | 968  | 0.95 | -0.07 | -0.13 | -0.30 |
| YGL197W    | MDS3       | 4738 | 4971 | 0.95 | -0.07 | -0.13 | -0.30 |
| YHR204W    |            | 846  | 888  | 0.95 | -0.07 | -0.13 | -0.30 |
| YJL071W    | ARG2       | 1885 | 1978 | 0.95 | -0.07 | -0.13 | -0.30 |
| YJL196C    | ELO1       | 1715 | 1799 | 0.95 | -0.07 | -0.13 | -0.30 |
| YDR335W    | MSN5       | 1911 | 2005 | 0.95 | -0.07 | -0.13 | -0.30 |
| YGL149W    |            | 1244 | 1305 | 0.95 | -0.07 | -0.13 | -0.30 |
| YDL223C    |            | 2915 | 3059 | 0.95 | -0.07 | -0.13 | -0.30 |
| YKRO07W    |            | 375  | 394  | 0.95 | -0.07 | -0.13 | -0.30 |
| YDL206W    |            | 2068 | 2171 | 0.95 | -0.07 | -0.13 | -0.30 |
| YHRCdelta4 | YHRCdelta4 | 487  | 511  | 0.95 | -0.07 | -0.13 | -0.30 |
| YDL207W    | GLE1       | 2384 | 2503 | 0.95 | -0.07 | -0.13 | -0.31 |
| YIRO24C    | GIF1       | 963  | 1011 | 0.95 | -0.07 | -0.13 | -0.31 |
| YLR215C    |            | 815  | 856  | 0.95 | -0.07 | -0.13 | -0.31 |
| YDR454C    | GUK1       | 2623 | 2755 | 0.95 | -0.07 | -0.13 | -0.31 |
| YLR207W    | HRD3       | 2854 | 2998 | 0.95 | -0.07 | -0.13 | -0.31 |
| YMR103C    |            | 1184 | 1244 | 0.95 | -0.07 | -0.13 | -0.31 |
| YDR040C    | ENA1       | 4451 | 4678 | 0.95 | -0.07 | -0.13 | -0.31 |
| YJL033W    | HCA4       | 3757 | 3949 | 0.95 | -0.07 | -0.13 | -0.31 |
| YLR068W    |            | 1419 | 1492 | 0.95 | -0.07 | -0.13 | -0.31 |
| YDR404C    | RPB7       | 5077 | 5338 | 0.95 | -0.07 | -0.13 | -0.31 |
| YJL088W    | ARG3       | 1135 | 1193 | 0.95 | -0.07 | -0.13 | -0.31 |
| YML006C    | GIS4       | 915  | 963  | 0.95 | -0.07 | -0.13 | -0.31 |
| YLR287C-A  | RPS30A     | 6470 | 6806 | 0.95 | -0.07 | -0.13 | -0.31 |
| YKL121W    |            | 3579 | 3766 | 0.95 | -0.07 | -0.13 | -0.31 |
| YBR131W    | CCZ1       | 3478 | 3659 | 0.95 | -0.07 | -0.13 | -0.31 |
| YBL038W    | MRPL16     | 1833 | 1929 | 0.95 | -0.07 | -0.13 | -0.31 |
| YCRX19W    |            | 1821 | 1918 | 0.95 | -0.07 | -0.13 | -0.32 |
| YLR166C    | SEC10      | 1706 | 1797 | 0.95 | -0.07 | -0.13 | -0.32 |
| YOR084W    |            | 567  | 597  | 0.95 | -0.08 | -0.13 | -0.32 |
| YGL047W    |            | 3852 | 4058 | 0.95 | -0.08 | -0.13 | -0.32 |
| YJR134C    | SGM1       | 3336 | 3515 | 0.95 | -0.08 | -0.13 | -0.32 |
| YDR447C    | RPS17B     | 3106 | 3273 | 0.95 | -0.08 | -0.13 | -0.32 |
| YDL188C    | PPH22      | 1798 | 1895 | 0.95 | -0.08 | -0.13 | -0.32 |

|         |        |       |       |      |       |       |       |
|---------|--------|-------|-------|------|-------|-------|-------|
| YER011W | TIR1   | 2845  | 2999  | 0.95 | -0.08 | -0.13 | -0.32 |
| YKL150W | MCR1   | 1434  | 1511  | 0.95 | -0.08 | -0.13 | -0.32 |
| YOL158C |        | 1363  | 1437  | 0.95 | -0.08 | -0.13 | -0.32 |
| YDL232W | OST4   | 894   | 942   | 0.95 | -0.08 | -0.13 | -0.32 |
| YDR536W | STL1   | 1334  | 1407  | 0.95 | -0.08 | -0.13 | -0.32 |
| YGL006W | PMC1   | 2738  | 2887  | 0.95 | -0.08 | -0.13 | -0.32 |
| YML059C |        | 3481  | 3671  | 0.95 | -0.08 | -0.13 | -0.32 |
| YER047C | SAP1   | 1541  | 1626  | 0.95 | -0.08 | -0.13 | -0.32 |
| YDR231C | COX20  | 1460  | 1541  | 0.95 | -0.08 | -0.13 | -0.32 |
| YLR088W | GAA1   | 2762  | 2915  | 0.95 | -0.08 | -0.13 | -0.32 |
| YOR351C | MEK1   | 1402  | 1480  | 0.95 | -0.08 | -0.13 | -0.32 |
| YLR465C |        | 4340  | 4581  | 0.95 | -0.08 | -0.13 | -0.32 |
| YJL100W |        | 844   | 891   | 0.95 | -0.08 | -0.13 | -0.32 |
| YNL215W |        | 3367  | 3558  | 0.95 | -0.08 | -0.14 | -0.33 |
| YHR022C |        | 1464  | 1547  | 0.95 | -0.08 | -0.14 | -0.33 |
| YCL054W | SPB1   | 10808 | 11424 | 0.95 | -0.08 | -0.14 | -0.33 |
| YELO21W | URA3   | 1544  | 1632  | 0.95 | -0.08 | -0.14 | -0.33 |
| YDL034W |        | 4800  | 5075  | 0.95 | -0.08 | -0.14 | -0.33 |
| YGR073C |        | 6359  | 6725  | 0.95 | -0.08 | -0.14 | -0.33 |
| YOL094C | RFC4   | 850   | 899   | 0.95 | -0.08 | -0.14 | -0.33 |
| YER095W | RAD51  | 3419  | 3617  | 0.95 | -0.08 | -0.14 | -0.33 |
| YDR294C | DPL1   | 1719  | 1819  | 0.95 | -0.08 | -0.14 | -0.33 |
| YLR160C | ASP3-4 | 1058  | 1120  | 0.94 | -0.08 | -0.14 | -0.33 |
| YCRX10W |        | 6040  | 6392  | 0.94 | -0.08 | -0.14 | -0.33 |
| YJR117W | STE24  | 1982  | 2098  | 0.94 | -0.08 | -0.14 | -0.33 |
| YHR215W | PHO12  | 4725  | 5001  | 0.94 | -0.08 | -0.14 | -0.33 |
| YKL114C | APN1   | 713   | 755   | 0.94 | -0.08 | -0.14 | -0.33 |
| YPL119C | DBP1   | 631   | 668   | 0.94 | -0.08 | -0.14 | -0.33 |
| YOR087W |        | 1115  | 1181  | 0.94 | -0.08 | -0.14 | -0.34 |
| YOR354C |        | 1878  | 1989  | 0.94 | -0.08 | -0.14 | -0.34 |
| YDL204W |        | 2118  | 2243  | 0.94 | -0.08 | -0.14 | -0.34 |
| YFLO68W |        | 6183  | 6549  | 0.94 | -0.08 | -0.14 | -0.34 |
| YDR463W | STP1   | 7333  | 7768  | 0.94 | -0.08 | -0.14 | -0.34 |
| YGR220C | MRPL9  | 3945  | 4180  | 0.94 | -0.08 | -0.14 | -0.34 |
| YNR036C |        | 1987  | 2106  | 0.94 | -0.08 | -0.14 | -0.34 |
| YAL026C | DRS2   | 2884  | 3057  | 0.94 | -0.08 | -0.14 | -0.34 |



|           |       |      |      |      |       |       |       |
|-----------|-------|------|------|------|-------|-------|-------|
| YDR047W   | HEM12 | 2175 | 2305 | 0.94 | -0.08 | -0.14 | -0.34 |
| YGL254W   | FZF1  | 722  | 765  | 0.94 | -0.08 | -0.14 | -0.34 |
| YDL018C   | ERP3  | 1055 | 1118 | 0.94 | -0.08 | -0.14 | -0.34 |
| YPR176C   | BET2  | 1313 | 1392 | 0.94 | -0.08 | -0.14 | -0.34 |
| YGR191W   | HIP1  | 4487 | 4759 | 0.94 | -0.08 | -0.14 | -0.34 |
| YIL117C   |       | 4185 | 4438 | 0.94 | -0.08 | -0.14 | -0.34 |
| YER002W   |       | 2682 | 2845 | 0.94 | -0.09 | -0.14 | -0.34 |
| YHR023W   | MYO1  | 6657 | 7062 | 0.94 | -0.09 | -0.14 | -0.34 |
| YDR056C   |       | 3214 | 3409 | 0.94 | -0.09 | -0.14 | -0.34 |
| YPL194W   | DDC1  | 2681 | 2844 | 0.94 | -0.09 | -0.14 | -0.34 |
| YBL073W   |       | 2204 | 2338 | 0.94 | -0.09 | -0.14 | -0.34 |
| YBL101W-B |       | 2003 | 2125 | 0.94 | -0.09 | -0.14 | -0.34 |
| YGL039W   |       | 2048 | 2173 | 0.94 | -0.09 | -0.14 | -0.34 |
| YDL172C   |       | 2781 | 2952 | 0.94 | -0.09 | -0.14 | -0.34 |
| YHR196W   |       | 1669 | 1771 | 0.94 | -0.09 | -0.14 | -0.34 |
| YLR261C   |       | 976  | 1036 | 0.94 | -0.09 | -0.14 | -0.34 |
| YPL158C   |       | 3216 | 3414 | 0.94 | -0.09 | -0.14 | -0.34 |
| YCR079W   |       | 1911 | 2029 | 0.94 | -0.09 | -0.14 | -0.34 |
| YJL151C   |       | 521  | 553  | 0.94 | -0.09 | -0.14 | -0.35 |
| YNL281W   | HCH1  | 2695 | 2863 | 0.94 | -0.09 | -0.14 | -0.35 |
| YDR069C   | DOA4  | 1451 | 1541 | 0.94 | -0.09 | -0.14 | -0.35 |
| YLR201C   |       | 706  | 750  | 0.94 | -0.09 | -0.14 | -0.35 |
| YKRO05C   |       | 1331 | 1414 | 0.94 | -0.09 | -0.14 | -0.35 |
| YPRO89W   |       | 486  | 516  | 0.94 | -0.09 | -0.14 | -0.35 |
| YNL265C   | IST1  | 2845 | 3024 | 0.94 | -0.09 | -0.14 | -0.35 |
| YER019W   |       | 1667 | 1772 | 0.94 | -0.09 | -0.14 | -0.35 |
| YGR265W   |       | 1311 | 1394 | 0.94 | -0.09 | -0.14 | -0.35 |
| YFRO20W   |       | 1568 | 1667 | 0.94 | -0.09 | -0.14 | -0.35 |
| YNL251C   | NRD1  | 3789 | 4029 | 0.94 | -0.09 | -0.14 | -0.35 |
| YER136W   | GDI1  | 8419 | 8956 | 0.94 | -0.09 | -0.15 | -0.35 |
| YMR281W   | GPI12 | 1856 | 1975 | 0.94 | -0.09 | -0.15 | -0.35 |
| YJR049C   | UTR1  | 2555 | 2719 | 0.94 | -0.09 | -0.15 | -0.35 |
| YCR006C   |       | 2223 | 2366 | 0.94 | -0.09 | -0.15 | -0.35 |
| YLR082C   | SRL2  | 1837 | 1955 | 0.94 | -0.09 | -0.15 | -0.35 |
| YHR115C   |       | 1734 | 1846 | 0.94 | -0.09 | -0.15 | -0.35 |
| YGL215W   | CLG1  | 3043 | 3241 | 0.94 | -0.09 | -0.15 | -0.36 |

|         |         |      |      |      |       |       |       |
|---------|---------|------|------|------|-------|-------|-------|
| YNL333W | SNZ2    | 501  | 534  | 0.94 | -0.09 | -0.15 | -0.36 |
| YBL048W |         | 6082 | 6480 | 0.94 | -0.09 | -0.15 | -0.36 |
| YDR187C |         | 3520 | 3751 | 0.94 | -0.09 | -0.15 | -0.36 |
| YPL234C | TFP3    | 1112 | 1185 | 0.94 | -0.09 | -0.15 | -0.36 |
| YOR153W | PDR5    | 7510 | 8007 | 0.94 | -0.09 | -0.15 | -0.36 |
| YLL066C |         | 7730 | 8242 | 0.94 | -0.09 | -0.15 | -0.36 |
| YKL205W | LOS1    | 2373 | 2531 | 0.94 | -0.09 | -0.15 | -0.36 |
| YGL195W | GCN1    | 3758 | 4009 | 0.94 | -0.09 | -0.15 | -0.36 |
| YJL158C | CIS3    | 2707 | 2888 | 0.94 | -0.09 | -0.15 | -0.36 |
| YIL051C | MMD1    | 872  | 930  | 0.94 | -0.09 | -0.15 | -0.36 |
| YIRO42C |         | 2108 | 2250 | 0.94 | -0.09 | -0.15 | -0.36 |
| YPL218W | SAR1    | 4690 | 5006 | 0.94 | -0.09 | -0.15 | -0.36 |
| YKR035C |         | 1010 | 1078 | 0.94 | -0.09 | -0.15 | -0.36 |
| YLR098C | CHA4    | 2963 | 3163 | 0.94 | -0.09 | -0.15 | -0.36 |
| YOR232W | MGE1    | 2399 | 2561 | 0.94 | -0.09 | -0.15 | -0.36 |
| YOR181W | LAS17   | 2489 | 2658 | 0.94 | -0.09 | -0.15 | -0.36 |
| YIRO35C |         | 970  | 1036 | 0.94 | -0.10 | -0.15 | -0.37 |
| YML016C | PPZ1    | 5088 | 5436 | 0.94 | -0.10 | -0.15 | -0.37 |
| YBR069C | VAP1    | 3616 | 3863 | 0.94 | -0.10 | -0.15 | -0.37 |
| YMR193W | MRPL24  | 346  | 370  | 0.94 | -0.10 | -0.15 | -0.37 |
| YCL003W |         | 1849 | 1976 | 0.94 | -0.10 | -0.15 | -0.37 |
| YOR019W |         | 1912 | 2044 | 0.94 | -0.10 | -0.15 | -0.37 |
| YMR095C | SNO1    | 1260 | 1348 | 0.94 | -0.10 | -0.15 | -0.37 |
| YLR079W | SIC1    | 3289 | 3518 | 0.93 | -0.10 | -0.15 | -0.37 |
| YBR255W |         | 2537 | 2714 | 0.93 | -0.10 | -0.15 | -0.37 |
| YDL101C | DUN1    | 2393 | 2561 | 0.93 | -0.10 | -0.15 | -0.37 |
| YIL132C |         | 1239 | 1326 | 0.93 | -0.10 | -0.15 | -0.37 |
| YCL034W |         | 752  | 805  | 0.93 | -0.10 | -0.15 | -0.37 |
| YBR140C | IRA1    | 5882 | 6299 | 0.93 | -0.10 | -0.15 | -0.37 |
| YIL017C | YIL017C | 3139 | 3361 | 0.93 | -0.10 | -0.15 | -0.37 |
| YHR100C |         | 1092 | 1170 | 0.93 | -0.10 | -0.16 | -0.38 |
| YOL155C |         | 3629 | 3888 | 0.93 | -0.10 | -0.16 | -0.38 |
| YNR056C | BIO5    | 2044 | 2190 | 0.93 | -0.10 | -0.16 | -0.38 |
| YOR228C |         | 1091 | 1169 | 0.93 | -0.10 | -0.16 | -0.38 |
| YML003W |         | 8550 | 9162 | 0.93 | -0.10 | -0.16 | -0.38 |
| YML056C |         | 4788 | 5131 | 0.93 | -0.10 | -0.16 | -0.38 |

|            |            |      |      |      |       |       |       |
|------------|------------|------|------|------|-------|-------|-------|
| YHR189W    |            | 756  | 810  | 0.93 | -0.10 | -0.16 | -0.38 |
| YDR507C    | GIN4       | 3530 | 3784 | 0.93 | -0.10 | -0.16 | -0.38 |
| YIL158W    |            | 390  | 418  | 0.93 | -0.10 | -0.16 | -0.38 |
| YCRX01W    |            | 8987 | 9640 | 0.93 | -0.10 | -0.16 | -0.38 |
| YBR057C    | MUM2       | 4260 | 4570 | 0.93 | -0.10 | -0.16 | -0.38 |
| YFR004W    | RPN11      | 2198 | 2358 | 0.93 | -0.10 | -0.16 | -0.38 |
| YMR152W    | YIM1       | 1064 | 1142 | 0.93 | -0.10 | -0.16 | -0.38 |
| YLR386W    |            | 1942 | 2085 | 0.93 | -0.10 | -0.16 | -0.38 |
| YILWTy3-1D | YILWTy3-1D | 2975 | 3194 | 0.93 | -0.10 | -0.16 | -0.38 |
| YNL329C    | PEX6       | 2256 | 2422 | 0.93 | -0.10 | -0.16 | -0.38 |
| YKL181W    | PRS1       | 3697 | 3971 | 0.93 | -0.10 | -0.16 | -0.38 |
| YDR180W    | SCC2       | 6740 | 7240 | 0.93 | -0.10 | -0.16 | -0.39 |
| YKL099C    |            | 4424 | 4753 | 0.93 | -0.10 | -0.16 | -0.39 |
| YDR198C    |            | 3151 | 3387 | 0.93 | -0.10 | -0.16 | -0.39 |
| YDL105W    | QRI2       | 1585 | 1704 | 0.93 | -0.10 | -0.16 | -0.39 |
| YLR442C    | SIR3       | 9043 | 9724 | 0.93 | -0.10 | -0.16 | -0.39 |
| YNL234W    |            | 1359 | 1461 | 0.93 | -0.10 | -0.16 | -0.39 |
| YML114C    |            | 781  | 840  | 0.93 | -0.11 | -0.16 | -0.39 |
| YML082W    |            | 2527 | 2718 | 0.93 | -0.11 | -0.16 | -0.39 |
| YAL065C-A  |            | 3083 | 3317 | 0.93 | -0.11 | -0.16 | -0.39 |
| YGL143C    | MRF1       | 6139 | 6606 | 0.93 | -0.11 | -0.16 | -0.39 |
| YLR169W    |            | 1078 | 1160 | 0.93 | -0.11 | -0.16 | -0.39 |
| YOR146W    |            | 957  | 1030 | 0.93 | -0.11 | -0.16 | -0.39 |
| YJL132W    |            | 1000 | 1077 | 0.93 | -0.11 | -0.16 | -0.39 |
| YGL053W    |            | 2331 | 2510 | 0.93 | -0.11 | -0.16 | -0.39 |
| YAL002W    | VPS8       | 2316 | 2495 | 0.93 | -0.11 | -0.16 | -0.39 |
| YBR222C    | FAT2       | 3084 | 3322 | 0.93 | -0.11 | -0.16 | -0.39 |
| YJR066W    | TOR1       | 1508 | 1624 | 0.93 | -0.11 | -0.16 | -0.39 |
| YMR209C    |            | 1259 | 1357 | 0.93 | -0.11 | -0.16 | -0.40 |
| YER005W    | YND1       | 2212 | 2384 | 0.93 | -0.11 | -0.16 | -0.40 |
| YOL053C-A  |            | 711  | 766  | 0.93 | -0.11 | -0.16 | -0.40 |
| YJL115W    | ASF1       | 2167 | 2336 | 0.93 | -0.11 | -0.16 | -0.40 |
| YLR452C    | SST2       | 3842 | 4141 | 0.93 | -0.11 | -0.16 | -0.40 |
| YLR357W    | RSC2       | 2888 | 3113 | 0.93 | -0.11 | -0.16 | -0.40 |
| YGL229C    | SAP4       | 2641 | 2847 | 0.93 | -0.11 | -0.16 | -0.40 |
| YMR094W    | CTF13      | 1121 | 1209 | 0.93 | -0.11 | -0.16 | -0.40 |

|            |            |      |      |      |       |       |       |
|------------|------------|------|------|------|-------|-------|-------|
| YNL156C    |            | 1327 | 1431 | 0.93 | -0.11 | -0.16 | -0.40 |
| YCR057C    | PWP2       | 5782 | 6235 | 0.93 | -0.11 | -0.16 | -0.40 |
| YCL074W    |            | 1699 | 1832 | 0.93 | -0.11 | -0.17 | -0.40 |
| YBL053W    |            | 2424 | 2615 | 0.93 | -0.11 | -0.17 | -0.40 |
| YDL025C    |            | 5910 | 6376 | 0.93 | -0.11 | -0.17 | -0.40 |
| YGR028W    | MSP1       | 1035 | 1117 | 0.93 | -0.11 | -0.17 | -0.40 |
| YNL228W    |            | 498  | 537  | 0.93 | -0.11 | -0.17 | -0.40 |
| YMR169C    | ALD3       | 1118 | 1206 | 0.93 | -0.11 | -0.17 | -0.40 |
| YCL005W    |            | 2590 | 2795 | 0.93 | -0.11 | -0.17 | -0.40 |
| YDR311W    | TFB1       | 812  | 877  | 0.93 | -0.11 | -0.17 | -0.40 |
| YKR009C    | FOX2       | 568  | 613  | 0.93 | -0.11 | -0.17 | -0.40 |
| YJL046W    |            | 1781 | 1923 | 0.93 | -0.11 | -0.17 | -0.40 |
| YMR120C    | ADE17      | 1607 | 1735 | 0.93 | -0.11 | -0.17 | -0.40 |
| YML053C    |            | 532  | 574  | 0.93 | -0.11 | -0.17 | -0.40 |
| YFRWdelta7 | YFRWdelta7 | 972  | 1050 | 0.93 | -0.11 | -0.17 | -0.40 |
| YGL201C    | MCM6       | 3028 | 3271 | 0.93 | -0.11 | -0.17 | -0.40 |
| YBR015C    | MNN2       | 1179 | 1274 | 0.93 | -0.11 | -0.17 | -0.40 |
| YNR031C    | SSK2       | 865  | 934  | 0.93 | -0.11 | -0.17 | -0.40 |
| YLR131C    | ACE2       | 2366 | 2557 | 0.93 | -0.11 | -0.17 | -0.41 |
| YBR094W    |            | 4053 | 4381 | 0.93 | -0.11 | -0.17 | -0.41 |
| YPL044C    |            | 5534 | 5983 | 0.92 | -0.11 | -0.17 | -0.41 |
| YNL323W    |            | 7068 | 7642 | 0.92 | -0.11 | -0.17 | -0.41 |
| YBR273C    |            | 2333 | 2523 | 0.92 | -0.11 | -0.17 | -0.41 |
| YIL175W    |            | 1198 | 1295 | 0.92 | -0.11 | -0.17 | -0.41 |
| YOR225W    |            | 2497 | 2701 | 0.92 | -0.11 | -0.17 | -0.41 |
| YLL054C    |            | 1156 | 1251 | 0.92 | -0.11 | -0.17 | -0.41 |
| YER169W    | RPH1       | 2167 | 2345 | 0.92 | -0.11 | -0.17 | -0.41 |
| YEL066W    | HPA3       | 1457 | 1576 | 0.92 | -0.11 | -0.17 | -0.41 |
| YKL191W    | DPH2       | 1753 | 1897 | 0.92 | -0.11 | -0.17 | -0.41 |
| YOR244W    | ESA1       | 660  | 714  | 0.92 | -0.11 | -0.17 | -0.41 |
| YCRX12W    |            | 1253 | 1356 | 0.92 | -0.11 | -0.17 | -0.41 |
| YHL038C    | CBP2       | 3821 | 4135 | 0.92 | -0.11 | -0.17 | -0.41 |
| YDR112W    |            | 472  | 511  | 0.92 | -0.11 | -0.17 | -0.41 |
| YDR041W    |            | 6403 | 6929 | 0.92 | -0.11 | -0.17 | -0.41 |
| YLR069C    | MEF1       | 2606 | 2820 | 0.92 | -0.11 | -0.17 | -0.41 |
| YERCdelta8 | YERCdelta8 | 464  | 502  | 0.92 | -0.11 | -0.17 | -0.41 |

|           |           |      |      |      |       |       |       |
|-----------|-----------|------|------|------|-------|-------|-------|
| YCRX21C   |           | 4345 | 4703 | 0.92 | -0.11 | -0.17 | -0.41 |
| YOR145C   |           | 2056 | 2226 | 0.92 | -0.11 | -0.17 | -0.41 |
| YGR083C   | GCD2      | 4417 | 4783 | 0.92 | -0.11 | -0.17 | -0.41 |
| YDL205C   | HEM3      | 2887 | 3126 | 0.92 | -0.11 | -0.17 | -0.41 |
| YDR307W   |           | 739  | 800  | 0.92 | -0.12 | -0.17 | -0.41 |
| YPR020W   | ATP20     | 354  | 383  | 0.92 | -0.12 | -0.17 | -0.41 |
| YLR402W   |           | 2917 | 3160 | 0.92 | -0.12 | -0.17 | -0.41 |
| YGL148W   | ARO2      | 2567 | 2781 | 0.92 | -0.12 | -0.17 | -0.41 |
| YHR219W   |           | 6424 | 6963 | 0.92 | -0.12 | -0.17 | -0.42 |
| YHR213W   |           | 1242 | 1347 | 0.92 | -0.12 | -0.17 | -0.42 |
| YBR135W   | CKS1      | 3742 | 4059 | 0.92 | -0.12 | -0.17 | -0.42 |
| YLR388W   | RPS29A    | 1235 | 1340 | 0.92 | -0.12 | -0.17 | -0.42 |
| YCRO47C   |           | 5414 | 5876 | 0.92 | -0.12 | -0.17 | -0.42 |
| YMR046W-A | YMR046W-A | 3082 | 3345 | 0.92 | -0.12 | -0.17 | -0.42 |
| YAL024C   | LTE1      | 665  | 722  | 0.92 | -0.12 | -0.18 | -0.42 |
| YBL076C   | ILS1      | 6563 | 7128 | 0.92 | -0.12 | -0.18 | -0.42 |
| YILO46W   | MET30     | 2044 | 2220 | 0.92 | -0.12 | -0.18 | -0.42 |
| YCL004W   | PGS1      | 780  | 847  | 0.92 | -0.12 | -0.18 | -0.42 |
| YLR025W   | SNF7      | 649  | 705  | 0.92 | -0.12 | -0.18 | -0.42 |
| YGR218W   | CRM1      | 3620 | 3933 | 0.92 | -0.12 | -0.18 | -0.42 |
| YDR502C   | SAM2      | 3639 | 3953 | 0.92 | -0.12 | -0.18 | -0.42 |
| YILO04C   | BET1      | 998  | 1084 | 0.92 | -0.12 | -0.18 | -0.42 |
| YGL261C   |           | 1446 | 1571 | 0.92 | -0.12 | -0.18 | -0.43 |
| YJL072C   |           | 1058 | 1150 | 0.92 | -0.12 | -0.18 | -0.43 |
| YFR011C   |           | 418  | 454  | 0.92 | -0.12 | -0.18 | -0.43 |
| YLL036C   | PRP19     | 1372 | 1491 | 0.92 | -0.12 | -0.18 | -0.43 |
| YGL056C   | SDS23     | 1724 | 1874 | 0.92 | -0.12 | -0.18 | -0.43 |
| YMR158W   |           | 3149 | 3423 | 0.92 | -0.12 | -0.18 | -0.43 |
| YCRX18C   |           | 5489 | 5966 | 0.92 | -0.12 | -0.18 | -0.43 |
| YBR293W   |           | 1771 | 1926 | 0.92 | -0.12 | -0.18 | -0.43 |
| YDL166C   |           | 1124 | 1222 | 0.92 | -0.12 | -0.18 | -0.43 |
| YOL111C   |           | 1360 | 1479 | 0.92 | -0.12 | -0.18 | -0.43 |
| YKL066W   |           | 917  | 997  | 0.92 | -0.12 | -0.18 | -0.43 |
| YDR184C   | ATC1      | 3526 | 3836 | 0.92 | -0.12 | -0.18 | -0.43 |
| YMR016C   | SOK2      | 2597 | 2827 | 0.92 | -0.12 | -0.18 | -0.43 |
| YELO19C   | MMS21     | 2176 | 2369 | 0.92 | -0.12 | -0.18 | -0.43 |

|            |            |       |       |      |       |       |       |
|------------|------------|-------|-------|------|-------|-------|-------|
| YPR126C    |            | 1814  | 1975  | 0.92 | -0.12 | -0.18 | -0.43 |
| YOR169C    |            | 2072  | 2256  | 0.92 | -0.12 | -0.18 | -0.43 |
| YBL024W    | NCL1       | 3645  | 3969  | 0.92 | -0.12 | -0.18 | -0.43 |
| YCR102C    |            | 691   | 753   | 0.92 | -0.12 | -0.18 | -0.43 |
| YHR036W    |            | 2529  | 2755  | 0.92 | -0.12 | -0.18 | -0.43 |
| YPL106C    | SSE1       | 6094  | 6638  | 0.92 | -0.12 | -0.18 | -0.43 |
| YEL038W    | UTR4       | 5397  | 5879  | 0.92 | -0.12 | -0.18 | -0.43 |
| YAL029C    | MYO4       | 1245  | 1356  | 0.92 | -0.12 | -0.18 | -0.43 |
| YLR229C    | CDC42      | 766   | 835   | 0.92 | -0.12 | -0.18 | -0.43 |
| YER008C    | SEC3       | 1570  | 1711  | 0.92 | -0.12 | -0.18 | -0.43 |
| YLR053C    |            | 1946  | 2120  | 0.92 | -0.12 | -0.18 | -0.43 |
| YIL031W    | SMT4       | 1267  | 1380  | 0.92 | -0.12 | -0.18 | -0.43 |
| YPR111W    | DBF20      | 2256  | 2458  | 0.92 | -0.12 | -0.18 | -0.43 |
| YJR024C    |            | 2649  | 2887  | 0.92 | -0.12 | -0.18 | -0.43 |
| YCR097WA   |            | 2080  | 2267  | 0.92 | -0.12 | -0.18 | -0.44 |
| YGR009C    | SEC9       | 3310  | 3608  | 0.92 | -0.12 | -0.18 | -0.44 |
| YDR150W    | NUM1       | 3498  | 3813  | 0.92 | -0.12 | -0.18 | -0.44 |
| YOR304W    | ISW2       | 897   | 978   | 0.92 | -0.12 | -0.18 | -0.44 |
| YLR189C    | UGT51      | 1079  | 1176  | 0.92 | -0.12 | -0.18 | -0.44 |
| YER160C    |            | 7891  | 8603  | 0.92 | -0.12 | -0.18 | -0.44 |
| YKL212W    | SAC1       | 3763  | 4103  | 0.92 | -0.12 | -0.18 | -0.44 |
| YBL012C    |            | 5064  | 5521  | 0.92 | -0.12 | -0.18 | -0.44 |
| YBL004W    |            | 2207  | 2407  | 0.92 | -0.12 | -0.18 | -0.44 |
| YBR167C    | POP7       | 2959  | 3227  | 0.92 | -0.12 | -0.18 | -0.44 |
| YDR060W    |            | 1073  | 1170  | 0.92 | -0.13 | -0.18 | -0.44 |
| YDRCTy1-2C | YDRCTy1-2C | 17873 | 19498 | 0.92 | -0.13 | -0.18 | -0.44 |
| YDR315C    | IPK1       | 2539  | 2770  | 0.92 | -0.13 | -0.18 | -0.44 |
| YJR126C    |            | 1769  | 1931  | 0.92 | -0.13 | -0.18 | -0.44 |
| YLR410W    | VIP1       | 1189  | 1298  | 0.92 | -0.13 | -0.18 | -0.44 |
| YKL183W    |            | 564   | 616   | 0.92 | -0.13 | -0.18 | -0.44 |
| YLR024C    |            | 8161  | 8910  | 0.92 | -0.13 | -0.18 | -0.44 |
| YNL219C    | ALG9       | 1632  | 1782  | 0.92 | -0.13 | -0.18 | -0.44 |
| YBR227C    | MCX1       | 7734  | 8444  | 0.92 | -0.13 | -0.18 | -0.44 |
| YCR077C    | PAT1       | 2698  | 2946  | 0.92 | -0.13 | -0.18 | -0.44 |
| YBL045C    | COR1       | 2023  | 2210  | 0.92 | -0.13 | -0.18 | -0.44 |
| YCR062W    |            | 3314  | 3620  | 0.92 | -0.13 | -0.18 | -0.44 |

|           |        |       |       |      |       |       |       |
|-----------|--------|-------|-------|------|-------|-------|-------|
| YNL140C   |        | 1339  | 1463  | 0.92 | -0.13 | -0.18 | -0.44 |
| YGL036W   | MTC2   | 1960  | 2142  | 0.92 | -0.13 | -0.18 | -0.44 |
| YOR200W   |        | 1390  | 1519  | 0.92 | -0.13 | -0.18 | -0.44 |
| YJR065C   | ARP3   | 2958  | 3233  | 0.91 | -0.13 | -0.18 | -0.45 |
| YCL069W   |        | 3141  | 3433  | 0.91 | -0.13 | -0.18 | -0.45 |
| YER023W   | PRO3   | 1078  | 1178  | 0.91 | -0.13 | -0.18 | -0.45 |
| YDL066W   | IDP1   | 10848 | 11862 | 0.91 | -0.13 | -0.19 | -0.45 |
| YGL037C   |        | 2140  | 2340  | 0.91 | -0.13 | -0.19 | -0.45 |
| YCRX09C   |        | 3924  | 4293  | 0.91 | -0.13 | -0.19 | -0.45 |
| YJL029C   |        | 2912  | 3186  | 0.91 | -0.13 | -0.19 | -0.45 |
| YJL084C   |        | 1241  | 1358  | 0.91 | -0.13 | -0.19 | -0.45 |
| YOL025W   | LAG2   | 7674  | 8400  | 0.91 | -0.13 | -0.19 | -0.45 |
| YLR223C   | IFH1   | 8998  | 9850  | 0.91 | -0.13 | -0.19 | -0.45 |
| YHL005C   |        | 383   | 419   | 0.91 | -0.13 | -0.19 | -0.45 |
| YBR170C   | NPL4   | 1897  | 2078  | 0.91 | -0.13 | -0.19 | -0.45 |
| YDL012C   |        | 3691  | 4042  | 0.91 | -0.13 | -0.19 | -0.45 |
| YJL130C   | URA2   | 6972  | 7640  | 0.91 | -0.13 | -0.19 | -0.45 |
| YOR229W   | WTM2   | 2010  | 2203  | 0.91 | -0.13 | -0.19 | -0.45 |
| YOR135C   |        | 1303  | 1428  | 0.91 | -0.13 | -0.19 | -0.46 |
| YDR105C   |        | 2100  | 2302  | 0.91 | -0.13 | -0.19 | -0.46 |
| YIL078W   | THS1   | 8527  | 9350  | 0.91 | -0.13 | -0.19 | -0.46 |
| YDL231C   |        | 2169  | 2378  | 0.91 | -0.13 | -0.19 | -0.46 |
| YPL072W   | UBP16  | 2027  | 2223  | 0.91 | -0.13 | -0.19 | -0.46 |
| YCRX03C   |        | 3105  | 3405  | 0.91 | -0.13 | -0.19 | -0.46 |
| YLR213C   | CRR1   | 976   | 1071  | 0.91 | -0.13 | -0.19 | -0.46 |
| YER019C-A | SBH2   | 1185  | 1301  | 0.91 | -0.13 | -0.19 | -0.46 |
| YBR208C   | DUR1,2 | 3490  | 3830  | 0.91 | -0.13 | -0.19 | -0.46 |
| YGL099W   |        | 3337  | 3663  | 0.91 | -0.13 | -0.19 | -0.46 |
| YGR251W   |        | 680   | 747   | 0.91 | -0.13 | -0.19 | -0.46 |
| YAL033W   | POP5   | 823   | 904   | 0.91 | -0.13 | -0.19 | -0.46 |
| YCL075W   |        | 1356  | 1489  | 0.91 | -0.13 | -0.19 | -0.46 |
| YGR061C   | ADE6   | 4818  | 5291  | 0.91 | -0.14 | -0.19 | -0.46 |
| YCR017C   |        | 9687  | 10638 | 0.91 | -0.14 | -0.19 | -0.46 |
| YNL320W   |        | 800   | 879   | 0.91 | -0.14 | -0.19 | -0.46 |
| YML128C   |        | 463   | 508   | 0.91 | -0.14 | -0.19 | -0.46 |
| YER090W   | TRP2   | 2693  | 2958  | 0.91 | -0.14 | -0.19 | -0.46 |

|         |       |      |      |      |       |       |       |
|---------|-------|------|------|------|-------|-------|-------|
| YLR413W |       | 3118 | 3425 | 0.91 | -0.14 | -0.19 | -0.46 |
| YCL073C |       | 6903 | 7583 | 0.91 | -0.14 | -0.19 | -0.46 |
| YER021W | RPN3  | 1712 | 1881 | 0.91 | -0.14 | -0.19 | -0.46 |
| YOR323C | PRO2  | 949  | 1043 | 0.91 | -0.14 | -0.19 | -0.46 |
| YDL102W | CDC2  | 828  | 910  | 0.91 | -0.14 | -0.19 | -0.46 |
| YCR081W | SRB8  | 4690 | 5153 | 0.91 | -0.14 | -0.19 | -0.46 |
| YGL249W | ZIP2  | 2180 | 2395 | 0.91 | -0.14 | -0.19 | -0.46 |
| YML111W | BUL2  | 1659 | 1823 | 0.91 | -0.14 | -0.19 | -0.46 |
| YLR272C | LOC7  | 7552 | 8300 | 0.91 | -0.14 | -0.19 | -0.46 |
| YML087C |       | 1229 | 1351 | 0.91 | -0.14 | -0.19 | -0.47 |
| YML081W |       | 4931 | 5420 | 0.91 | -0.14 | -0.19 | -0.47 |
| YGR252W | GCN5  | 4440 | 4882 | 0.91 | -0.14 | -0.19 | -0.47 |
| YIR031C | DAL7  | 1275 | 1402 | 0.91 | -0.14 | -0.19 | -0.47 |
| YNL155W |       | 1424 | 1566 | 0.91 | -0.14 | -0.19 | -0.47 |
| YNL184C |       | 2303 | 2533 | 0.91 | -0.14 | -0.19 | -0.47 |
| YHR054C |       | 1069 | 1176 | 0.91 | -0.14 | -0.19 | -0.47 |
| YGL005C |       | 4467 | 4914 | 0.91 | -0.14 | -0.19 | -0.47 |
| YCR076C |       | 2963 | 3260 | 0.91 | -0.14 | -0.19 | -0.47 |
| YDR491C |       | 929  | 1022 | 0.91 | -0.14 | -0.19 | -0.47 |
| YER006W |       | 5616 | 6180 | 0.91 | -0.14 | -0.19 | -0.47 |
| YFL043C |       | 586  | 645  | 0.91 | -0.14 | -0.19 | -0.47 |
| YOR363C | PIP2  | 728  | 801  | 0.91 | -0.14 | -0.19 | -0.47 |
| YNL276C |       | 797  | 877  | 0.91 | -0.14 | -0.19 | -0.47 |
| YHR123W | EPT1  | 1692 | 1862 | 0.91 | -0.14 | -0.19 | -0.47 |
| YLR104W |       | 1851 | 2038 | 0.91 | -0.14 | -0.19 | -0.47 |
| YBL020W | RFT1  | 6717 | 7396 | 0.91 | -0.14 | -0.20 | -0.47 |
| YOR005C | DNL4  | 1933 | 2128 | 0.91 | -0.14 | -0.20 | -0.47 |
| YOR384W | FRE5  | 2265 | 2495 | 0.91 | -0.14 | -0.20 | -0.47 |
| YCLX11W |       | 1361 | 1499 | 0.91 | -0.14 | -0.20 | -0.47 |
| YAR070C |       | 4702 | 5179 | 0.91 | -0.14 | -0.20 | -0.47 |
| YGL082W |       | 1693 | 1865 | 0.91 | -0.14 | -0.20 | -0.47 |
| YLR008C |       | 3836 | 4227 | 0.91 | -0.14 | -0.20 | -0.47 |
| YJR033C |       | 3321 | 3660 | 0.91 | -0.14 | -0.20 | -0.47 |
| YDR530C | APA2  | 1101 | 1213 | 0.91 | -0.14 | -0.20 | -0.47 |
| YML051W | GAL80 | 2871 | 3164 | 0.91 | -0.14 | -0.20 | -0.47 |
| YAR007C | RFA1  | 1658 | 1827 | 0.91 | -0.14 | -0.20 | -0.47 |



|         |        |      |      |      |       |       |       |
|---------|--------|------|------|------|-------|-------|-------|
| YOR184W | SER1   | 1400 | 1543 | 0.91 | -0.14 | -0.20 | -0.48 |
| YML075C | HMG1   | 2862 | 3157 | 0.91 | -0.14 | -0.20 | -0.48 |
| YDR475C |        | 1609 | 1775 | 0.91 | -0.14 | -0.20 | -0.48 |
| YNL007C | SIS1   | 2222 | 2451 | 0.91 | -0.14 | -0.20 | -0.48 |
| YML049C | RSE1   | 332  | 366  | 0.91 | -0.14 | -0.20 | -0.48 |
| YIL127C |        | 1156 | 1276 | 0.91 | -0.14 | -0.20 | -0.48 |
| YLR233C | EST1   | 806  | 890  | 0.91 | -0.14 | -0.20 | -0.48 |
| YOL121C | RPS19A | 2407 | 2657 | 0.91 | -0.14 | -0.20 | -0.48 |
| YBR075W |        | 3553 | 3922 | 0.91 | -0.14 | -0.20 | -0.48 |
| YGR204W | ADE3   | 4077 | 4501 | 0.91 | -0.14 | -0.20 | -0.48 |
| YHL036W | MUP3   | 1165 | 1286 | 0.91 | -0.14 | -0.20 | -0.48 |
| YOL048C |        | 546  | 603  | 0.91 | -0.14 | -0.20 | -0.48 |
| YER033C |        | 636  | 702  | 0.91 | -0.14 | -0.20 | -0.48 |
| YCRX16C |        | 696  | 769  | 0.91 | -0.14 | -0.20 | -0.48 |
| YDR201W | SPC19  | 4018 | 4438 | 0.91 | -0.14 | -0.20 | -0.48 |
| YDR309C | GIC2   | 2723 | 3009 | 0.91 | -0.14 | -0.20 | -0.48 |
| YBR095C |        | 699  | 772  | 0.90 | -0.14 | -0.20 | -0.48 |
| YBL054W |        | 8838 | 9767 | 0.90 | -0.14 | -0.20 | -0.48 |
| YDL142C | CRD1   | 1511 | 1670 | 0.90 | -0.14 | -0.20 | -0.48 |
| YGR143W | SKN1   | 1610 | 1780 | 0.90 | -0.14 | -0.20 | -0.48 |
| YDL169C | UGX2   | 4422 | 4889 | 0.90 | -0.14 | -0.20 | -0.49 |
| YNL316C | PHA2   | 1719 | 1901 | 0.90 | -0.14 | -0.20 | -0.49 |
| YAR060C |        | 1589 | 1757 | 0.90 | -0.15 | -0.20 | -0.49 |
| YIL150C | DNA43  | 1096 | 1212 | 0.90 | -0.15 | -0.20 | -0.49 |
| YLR448W | RPL6B  | 4093 | 4528 | 0.90 | -0.15 | -0.20 | -0.49 |
| YGR062C | COX18  | 763  | 844  | 0.90 | -0.15 | -0.20 | -0.49 |
| YNL317W | PFS2   | 4559 | 5044 | 0.90 | -0.15 | -0.20 | -0.49 |
| YDR431W |        | 374  | 414  | 0.90 | -0.15 | -0.20 | -0.49 |
| YBR245C | ISW1   | 6229 | 6892 | 0.90 | -0.15 | -0.20 | -0.49 |
| YOL092W |        | 1036 | 1147 | 0.90 | -0.15 | -0.20 | -0.49 |
| YIL061C | SNP1   | 3711 | 4107 | 0.90 | -0.15 | -0.20 | -0.49 |
| YIL112W |        | 3969 | 4393 | 0.90 | -0.15 | -0.20 | -0.49 |
| YDL007W | RPT2   | 1936 | 2143 | 0.90 | -0.15 | -0.20 | -0.49 |
| YNL119W |        | 5192 | 5747 | 0.90 | -0.15 | -0.20 | -0.49 |
| YPR143W |        | 1107 | 1225 | 0.90 | -0.15 | -0.20 | -0.49 |
| YDL073W |        | 3243 | 3590 | 0.90 | -0.15 | -0.20 | -0.49 |

|             |             |      |      |      |       |       |       |
|-------------|-------------|------|------|------|-------|-------|-------|
| YER066W     |             | 1425 | 1578 | 0.90 | -0.15 | -0.20 | -0.49 |
| YPR133W-A   | YPR133W-A   | 625  | 692  | 0.90 | -0.15 | -0.20 | -0.49 |
| YOR338W     |             | 664  | 735  | 0.90 | -0.15 | -0.20 | -0.49 |
| YNL044W     | YIP3        | 1461 | 1619 | 0.90 | -0.15 | -0.20 | -0.49 |
| YKL075C     |             | 802  | 888  | 0.90 | -0.15 | -0.20 | -0.49 |
| YDL156W     |             | 2451 | 2715 | 0.90 | -0.15 | -0.20 | -0.49 |
| YOL027C     |             | 2596 | 2876 | 0.90 | -0.15 | -0.20 | -0.49 |
| YMR088C     |             | 2011 | 2229 | 0.90 | -0.15 | -0.20 | -0.49 |
| YDR421W     |             | 2379 | 2637 | 0.90 | -0.15 | -0.20 | -0.49 |
| YOR002W     | ALG6        | 1721 | 1907 | 0.90 | -0.15 | -0.20 | -0.49 |
| YLR181C     |             | 2148 | 2381 | 0.90 | -0.15 | -0.20 | -0.49 |
| YOR148C     | SPP2        | 2356 | 2612 | 0.90 | -0.15 | -0.20 | -0.49 |
| YLR389C     | STE23       | 1493 | 1655 | 0.90 | -0.15 | -0.20 | -0.49 |
| YPL187W     | MF(ALPHA)1  | 696  | 772  | 0.90 | -0.15 | -0.21 | -0.50 |
| YPL073C     |             | 1699 | 1884 | 0.90 | -0.15 | -0.21 | -0.50 |
| YGR098C     | ESP1        | 2882 | 3196 | 0.90 | -0.15 | -0.21 | -0.50 |
| YJR149W     |             | 1040 | 1154 | 0.90 | -0.15 | -0.21 | -0.50 |
| YJL063C     | MRPL8       | 557  | 618  | 0.90 | -0.15 | -0.21 | -0.50 |
| YMR034C     |             | 1592 | 1767 | 0.90 | -0.15 | -0.21 | -0.50 |
| YCR004C     | YCP4        | 2476 | 2748 | 0.90 | -0.15 | -0.21 | -0.50 |
| YGL043W     | DST1        | 5509 | 6115 | 0.90 | -0.15 | -0.21 | -0.50 |
| YGL186C     |             | 1872 | 2078 | 0.90 | -0.15 | -0.21 | -0.50 |
| YPL217C     | BMS1        | 6868 | 7626 | 0.90 | -0.15 | -0.21 | -0.50 |
| YOL012C     | HTA3        | 896  | 995  | 0.90 | -0.15 | -0.21 | -0.50 |
| YNL191W     |             | 713  | 792  | 0.90 | -0.15 | -0.21 | -0.50 |
| YBR225W     |             | 3457 | 3839 | 0.90 | -0.15 | -0.21 | -0.50 |
| YKRCdelta11 | YKRCdelta11 | 3053 | 3390 | 0.90 | -0.15 | -0.21 | -0.50 |
| YOL135C     | MED7        | 2075 | 2305 | 0.90 | -0.15 | -0.21 | -0.50 |
| YMR164C     | MSS11       | 3107 | 3451 | 0.90 | -0.15 | -0.21 | -0.50 |
| YNR024W     |             | 1534 | 1704 | 0.90 | -0.15 | -0.21 | -0.50 |
| YDR206W     | EBS1        | 4981 | 5533 | 0.90 | -0.15 | -0.21 | -0.50 |
| YFL009W     | CDC4        | 2264 | 2515 | 0.90 | -0.15 | -0.21 | -0.50 |
| YLL018C-A   | COX19       | 2850 | 3166 | 0.90 | -0.15 | -0.21 | -0.50 |
| YNL077W     |             | 937  | 1041 | 0.90 | -0.15 | -0.21 | -0.50 |
| YGL066W     |             | 1590 | 1766 | 0.90 | -0.15 | -0.21 | -0.50 |
| YNR057C     | BIO4        | 368  | 409  | 0.90 | -0.15 | -0.21 | -0.50 |

|           |       |       |       |      |       |       |       |
|-----------|-------|-------|-------|------|-------|-------|-------|
| YHR122W   |       | 3266  | 3629  | 0.90 | -0.15 | -0.21 | -0.50 |
| YPR007C   | SPO69 | 322   | 358   | 0.90 | -0.15 | -0.21 | -0.50 |
| YIRO14W   |       | 819   | 910   | 0.90 | -0.15 | -0.21 | -0.50 |
| YCRX17W   |       | 4345  | 4830  | 0.90 | -0.15 | -0.21 | -0.50 |
| YDL208W   | NHP2  | 1039  | 1155  | 0.90 | -0.15 | -0.21 | -0.50 |
| YGR269W   |       | 846   | 941   | 0.90 | -0.15 | -0.21 | -0.50 |
| YPL138C   |       | 1315  | 1462  | 0.90 | -0.15 | -0.21 | -0.50 |
| YDR302W   |       | 2055  | 2285  | 0.90 | -0.15 | -0.21 | -0.51 |
| YILO80W   |       | 3130  | 3481  | 0.90 | -0.15 | -0.21 | -0.51 |
| YJR005W   | APL1  | 1561  | 1736  | 0.90 | -0.15 | -0.21 | -0.51 |
| YER060w-A | FCY22 | 2560  | 2848  | 0.90 | -0.15 | -0.21 | -0.51 |
| YDR197W   | CBS2  | 1883  | 2095  | 0.90 | -0.15 | -0.21 | -0.51 |
| YGR186W   | TFG1  | 3141  | 3495  | 0.90 | -0.15 | -0.21 | -0.51 |
| YNR018W   |       | 687   | 764   | 0.90 | -0.15 | -0.21 | -0.51 |
| YAL064W   |       | 2856  | 3179  | 0.90 | -0.15 | -0.21 | -0.51 |
| YBR074W   |       | 2615  | 2911  | 0.90 | -0.15 | -0.21 | -0.51 |
| YJL036W   | SNX4  | 4259  | 4740  | 0.90 | -0.15 | -0.21 | -0.51 |
| YDR262W   |       | 3168  | 3526  | 0.90 | -0.15 | -0.21 | -0.51 |
| YILO53W   | RHR2  | 3610  | 4018  | 0.90 | -0.15 | -0.21 | -0.51 |
| YJL221C   | FSP2  | 518   | 577   | 0.90 | -0.15 | -0.21 | -0.51 |
| YCR049C   |       | 2341  | 2606  | 0.90 | -0.15 | -0.21 | -0.51 |
| YBL058W   | SHP1  | 1445  | 1609  | 0.90 | -0.16 | -0.21 | -0.51 |
| YKL055C   | OAR1  | 725   | 808   | 0.90 | -0.16 | -0.21 | -0.51 |
| YKR055W   | RHO4  | 337   | 375   | 0.90 | -0.16 | -0.21 | -0.51 |
| YML073C   | RPL6A | 1748  | 1948  | 0.90 | -0.16 | -0.21 | -0.51 |
| YGL227W   | TIN1  | 1230  | 1371  | 0.90 | -0.16 | -0.21 | -0.51 |
| YDR345C   | HXT3  | 2058  | 2294  | 0.90 | -0.16 | -0.21 | -0.51 |
| YDR238C   | SEC26 | 6508  | 7254  | 0.90 | -0.16 | -0.21 | -0.51 |
| YILO59C   |       | 1161  | 1295  | 0.90 | -0.16 | -0.21 | -0.52 |
| YNR042W   |       | 1251  | 1395  | 0.90 | -0.16 | -0.21 | -0.52 |
| YGR072W   | UPF3  | 4284  | 4778  | 0.90 | -0.16 | -0.21 | -0.52 |
| YLR171W   |       | 1537  | 1715  | 0.90 | -0.16 | -0.21 | -0.52 |
| YIRO40C   |       | 1185  | 1324  | 0.90 | -0.16 | -0.22 | -0.52 |
| YBR230C   |       | 2199  | 2457  | 0.89 | -0.16 | -0.22 | -0.52 |
| YDR070C   |       | 2318  | 2590  | 0.89 | -0.16 | -0.22 | -0.52 |
| YFL-TYA   |       | 14217 | 15889 | 0.89 | -0.16 | -0.22 | -0.52 |

|            |            |      |      |      |       |       |       |
|------------|------------|------|------|------|-------|-------|-------|
| YJL104W    |            | 1981 | 2215 | 0.89 | -0.16 | -0.22 | -0.52 |
| YNL266W    |            | 1529 | 1710 | 0.89 | -0.16 | -0.22 | -0.52 |
| YNL247W    |            | 4658 | 5212 | 0.89 | -0.16 | -0.22 | -0.53 |
| YLR031W    |            | 2568 | 2874 | 0.89 | -0.16 | -0.22 | -0.53 |
| YOLCdelta2 | YOLCdelta2 | 2791 | 3124 | 0.89 | -0.16 | -0.22 | -0.53 |
| YILO23C    |            | 940  | 1052 | 0.89 | -0.16 | -0.22 | -0.53 |
| YAL012W    | CYS3       | 1099 | 1231 | 0.89 | -0.16 | -0.22 | -0.53 |
| YJL150W    |            | 2090 | 2340 | 0.89 | -0.16 | -0.22 | -0.53 |
| YPR115W    |            | 739  | 827  | 0.89 | -0.16 | -0.22 | -0.53 |
| YCR066W    | RAD18      | 2413 | 2702 | 0.89 | -0.16 | -0.22 | -0.53 |
| YJL022W    |            | 1930 | 2163 | 0.89 | -0.16 | -0.22 | -0.53 |
| YDL122W    | UBP1       | 4360 | 4887 | 0.89 | -0.16 | -0.22 | -0.53 |
| YER137C    |            | 1499 | 1681 | 0.89 | -0.17 | -0.22 | -0.53 |
| YJR142W    |            | 781  | 876  | 0.89 | -0.17 | -0.22 | -0.54 |
| YOR189W    |            | 926  | 1039 | 0.89 | -0.17 | -0.22 | -0.54 |
| YDL078C    | MDH3       | 3100 | 3478 | 0.89 | -0.17 | -0.22 | -0.54 |
| YDR264C    | AKR1       | 1371 | 1538 | 0.89 | -0.17 | -0.22 | -0.54 |
| YKR081C    |            | 2613 | 2932 | 0.89 | -0.17 | -0.22 | -0.54 |
| YGL202W    | ARO8       | 2785 | 3126 | 0.89 | -0.17 | -0.22 | -0.54 |
| YBR209W    |            | 2044 | 2295 | 0.89 | -0.17 | -0.22 | -0.54 |
| YBR026C    | MRF1'      | 5949 | 6680 | 0.89 | -0.17 | -0.22 | -0.54 |
| YCL017C    | NFS1       | 2982 | 3349 | 0.89 | -0.17 | -0.22 | -0.54 |
| YOR293W    | RPS10A     | 1059 | 1190 | 0.89 | -0.17 | -0.22 | -0.54 |
| YMR064W    | AEP1       | 1590 | 1786 | 0.89 | -0.17 | -0.22 | -0.54 |
| YDR366C    |            | 2745 | 3084 | 0.89 | -0.17 | -0.22 | -0.54 |
| YJL042W    | MHP1       | 1545 | 1736 | 0.89 | -0.17 | -0.22 | -0.54 |
| YPL110C    |            | 3227 | 3626 | 0.89 | -0.17 | -0.22 | -0.54 |
| YGR042W    |            | 426  | 479  | 0.89 | -0.17 | -0.22 | -0.54 |
| YGL114W    |            | 1701 | 1912 | 0.89 | -0.17 | -0.22 | -0.54 |
| YKR028W    | SAP190     | 1109 | 1247 | 0.89 | -0.17 | -0.23 | -0.54 |
| YOR004W    |            | 3350 | 3767 | 0.89 | -0.17 | -0.23 | -0.54 |
| YILO82W-A  |            | 6060 | 6814 | 0.89 | -0.17 | -0.23 | -0.54 |
| YHR071W    | PCL5       | 3955 | 4449 | 0.89 | -0.17 | -0.23 | -0.55 |
| YLR411W    | CTR3       | 722  | 812  | 0.89 | -0.17 | -0.23 | -0.55 |
| YPL251W    |            | 1537 | 1729 | 0.89 | -0.17 | -0.23 | -0.55 |
| YDR123C    | INO2       | 2510 | 2825 | 0.89 | -0.17 | -0.23 | -0.55 |

|           |       |      |      |      |       |       |       |
|-----------|-------|------|------|------|-------|-------|-------|
| YGR017W   |       | 2287 | 2575 | 0.89 | -0.17 | -0.23 | -0.55 |
| YGL069C   |       | 1190 | 1340 | 0.89 | -0.17 | -0.23 | -0.55 |
| YGR056W   | RSC1  | 1369 | 1542 | 0.89 | -0.17 | -0.23 | -0.55 |
| YOR165W   |       | 3448 | 3884 | 0.89 | -0.17 | -0.23 | -0.55 |
| YNL169C   | PSD1  | 712  | 802  | 0.89 | -0.17 | -0.23 | -0.55 |
| YGR079W   |       | 2209 | 2488 | 0.89 | -0.17 | -0.23 | -0.55 |
| YHR110W   | ERP5  | 4886 | 5504 | 0.89 | -0.17 | -0.23 | -0.55 |
| YAL054C   | ACS1  | 2390 | 2693 | 0.89 | -0.17 | -0.23 | -0.55 |
| YLR340W   | RPP0  | 2533 | 2854 | 0.89 | -0.17 | -0.23 | -0.55 |
| YLR141W   | RRN5  | 1419 | 1599 | 0.89 | -0.17 | -0.23 | -0.55 |
| YOL013C   | HRD1  | 1378 | 1553 | 0.89 | -0.17 | -0.23 | -0.55 |
| YMR178W   |       | 3568 | 4022 | 0.89 | -0.17 | -0.23 | -0.55 |
| YGR006W   | PRP18 | 557  | 628  | 0.89 | -0.17 | -0.23 | -0.55 |
| YOR273C   |       | 580  | 654  | 0.89 | -0.17 | -0.23 | -0.55 |
| YNL249C   | MPA43 | 2154 | 2429 | 0.89 | -0.17 | -0.23 | -0.55 |
| YJL066C   |       | 1269 | 1431 | 0.89 | -0.17 | -0.23 | -0.55 |
| YFR030W   | MET10 | 1166 | 1315 | 0.89 | -0.17 | -0.23 | -0.55 |
| YGR030C   | POP6  | 1831 | 2065 | 0.89 | -0.17 | -0.23 | -0.55 |
| YDR074W   | TPS2  | 2360 | 2662 | 0.89 | -0.17 | -0.23 | -0.56 |
| YBR073W   | RDH54 | 2881 | 3251 | 0.89 | -0.17 | -0.23 | -0.56 |
| YJR054W   |       | 1603 | 1810 | 0.89 | -0.18 | -0.23 | -0.56 |
| YOL063C   |       | 1546 | 1746 | 0.89 | -0.18 | -0.23 | -0.56 |
| YIL014W   | MNT3  | 1506 | 1701 | 0.89 | -0.18 | -0.23 | -0.56 |
| YBL085W   | BOI1  | 1137 | 1284 | 0.89 | -0.18 | -0.23 | -0.56 |
| YJL091C   |       | 2929 | 3308 | 0.89 | -0.18 | -0.23 | -0.56 |
| YMR173W-A |       | 1580 | 1785 | 0.89 | -0.18 | -0.23 | -0.56 |
| YOL041C   |       | 2446 | 2763 | 0.89 | -0.18 | -0.23 | -0.56 |
| YDR492W   |       | 1491 | 1684 | 0.89 | -0.18 | -0.23 | -0.56 |
| YDR402C   | DIT2  | 464  | 524  | 0.89 | -0.18 | -0.23 | -0.56 |
| YGL258W   |       | 855  | 966  | 0.88 | -0.18 | -0.23 | -0.56 |
| YDL190C   | UFD2  | 6270 | 7087 | 0.88 | -0.18 | -0.23 | -0.56 |
| YDL060W   |       | 2104 | 2379 | 0.88 | -0.18 | -0.23 | -0.56 |
| YJR120W   |       | 1011 | 1143 | 0.88 | -0.18 | -0.23 | -0.56 |
| YOR292C   |       | 568  | 642  | 0.88 | -0.18 | -0.23 | -0.56 |
| YGR156W   |       | 2061 | 2330 | 0.88 | -0.18 | -0.23 | -0.56 |
| YML086C   | ALO1  | 1748 | 1977 | 0.88 | -0.18 | -0.23 | -0.56 |

|             |             |      |      |      |       |       |       |
|-------------|-------------|------|------|------|-------|-------|-------|
| YPR046W     | MCM16       | 1319 | 1491 | 0.88 | -0.18 | -0.23 | -0.56 |
| YDR449C     |             | 1194 | 1350 | 0.88 | -0.18 | -0.23 | -0.56 |
| YDR390C     | UBA2        | 1474 | 1667 | 0.88 | -0.18 | -0.23 | -0.57 |
| YMR018W     |             | 642  | 726  | 0.88 | -0.18 | -0.23 | -0.57 |
| YLR092W     | SUL2        | 1466 | 1659 | 0.88 | -0.18 | -0.23 | -0.57 |
| YDR349C     | YPS7        | 1300 | 1472 | 0.88 | -0.18 | -0.23 | -0.57 |
| YGR242W     |             | 1195 | 1353 | 0.88 | -0.18 | -0.24 | -0.57 |
| YERWdelta21 | YERWdelta21 | 8436 | 9553 | 0.88 | -0.18 | -0.24 | -0.57 |
| YMR077C     |             | 1129 | 1278 | 0.88 | -0.18 | -0.24 | -0.57 |
| YEL001C     |             | 3005 | 3406 | 0.88 | -0.18 | -0.24 | -0.57 |
| YPL056C     |             | 2012 | 2281 | 0.88 | -0.18 | -0.24 | -0.57 |
| YCR105W     |             | 4089 | 4636 | 0.88 | -0.18 | -0.24 | -0.57 |
| YLR095C     |             | 3981 | 4515 | 0.88 | -0.18 | -0.24 | -0.57 |
| YAR074C     |             | 5078 | 5760 | 0.88 | -0.18 | -0.24 | -0.57 |
| YFRO45W     |             | 920  | 1044 | 0.88 | -0.18 | -0.24 | -0.58 |
| YGR249W     | MGA1        | 955  | 1084 | 0.88 | -0.18 | -0.24 | -0.58 |
| YOR141C     | ARP8        | 3934 | 4465 | 0.88 | -0.18 | -0.24 | -0.58 |
| YMR293C     |             | 527  | 598  | 0.88 | -0.18 | -0.24 | -0.58 |
| YDR148C     | KGD2        | 1547 | 1757 | 0.88 | -0.18 | -0.24 | -0.58 |
| YHR171W     | APG7        | 1137 | 1291 | 0.88 | -0.18 | -0.24 | -0.58 |
| YLR371W     | ROM2        | 2654 | 3014 | 0.88 | -0.18 | -0.24 | -0.58 |
| YPLCdelta10 | YPLCdelta10 | 436  | 495  | 0.88 | -0.18 | -0.24 | -0.58 |
| YGL063W     | PUS2        | 1856 | 2108 | 0.88 | -0.18 | -0.24 | -0.58 |
| YGL032C     | AGA2        | 384  | 436  | 0.88 | -0.18 | -0.24 | -0.58 |
| YBR246W     |             | 3249 | 3691 | 0.88 | -0.18 | -0.24 | -0.58 |
| YDR251W     | PAM1        | 1905 | 2164 | 0.88 | -0.18 | -0.24 | -0.58 |
| YAL028W     |             | 3195 | 3631 | 0.88 | -0.18 | -0.24 | -0.58 |
| YGR228W     |             | 2074 | 2357 | 0.88 | -0.18 | -0.24 | -0.58 |
| YML085C     | TUB1        | 2286 | 2599 | 0.88 | -0.19 | -0.24 | -0.58 |
| YIR009W     | MSL1        | 752  | 855  | 0.88 | -0.19 | -0.24 | -0.58 |
| YDR254W     | CHL4        | 2916 | 3316 | 0.88 | -0.19 | -0.24 | -0.58 |
| YKRO45C     |             | 2370 | 2695 | 0.88 | -0.19 | -0.24 | -0.58 |
| YPR040W     |             | 809  | 920  | 0.88 | -0.19 | -0.24 | -0.58 |
| YNL076W     | MKS1        | 5742 | 6531 | 0.88 | -0.19 | -0.24 | -0.58 |
| YJL201W     | ECM25       | 1707 | 1943 | 0.88 | -0.19 | -0.24 | -0.59 |
| YML112W     | CTK3        | 803  | 914  | 0.88 | -0.19 | -0.24 | -0.59 |

|            |            |       |       |      |       |       |       |
|------------|------------|-------|-------|------|-------|-------|-------|
| YOR103C    | OST2       | 1122  | 1278  | 0.88 | -0.19 | -0.24 | -0.59 |
| YIL126W    | STH1       | 3579  | 4077  | 0.88 | -0.19 | -0.24 | -0.59 |
| YBR218C    | PYC2       | 2819  | 3211  | 0.88 | -0.19 | -0.24 | -0.59 |
| YPL155C    | KIP2       | 1219  | 1389  | 0.88 | -0.19 | -0.24 | -0.59 |
| YMR194W    | RPL36A     | 2572  | 2930  | 0.88 | -0.19 | -0.24 | -0.59 |
| YNL108C    |            | 2115  | 2410  | 0.88 | -0.19 | -0.24 | -0.59 |
| YEL060C    | PRB1       | 2769  | 3155  | 0.88 | -0.19 | -0.24 | -0.59 |
| YOR023C    | AHC1       | 925   | 1054  | 0.88 | -0.19 | -0.24 | -0.59 |
| YJL214W    | HXT8       | 1188  | 1354  | 0.88 | -0.19 | -0.25 | -0.59 |
| YBR243C    | ALG7       | 4163  | 4748  | 0.88 | -0.19 | -0.25 | -0.59 |
| YIL030C    | SSM4       | 6235  | 7111  | 0.88 | -0.19 | -0.25 | -0.59 |
| YKL158W    |            | 591   | 674   | 0.88 | -0.19 | -0.25 | -0.59 |
| YGR109C    | CLB6       | 1534  | 1750  | 0.88 | -0.19 | -0.25 | -0.59 |
| YJL128C    | PBS2       | 1057  | 1206  | 0.88 | -0.19 | -0.25 | -0.59 |
| YLR454W    |            | 6741  | 7692  | 0.88 | -0.19 | -0.25 | -0.60 |
| YDR222W    |            | 4452  | 5081  | 0.88 | -0.19 | -0.25 | -0.60 |
| YPRO71W    |            | 415   | 474   | 0.88 | -0.19 | -0.25 | -0.60 |
| YNL039W    | TFC5       | 704   | 803   | 0.88 | -0.19 | -0.25 | -0.60 |
| YBR287W    |            | 1007  | 1150  | 0.88 | -0.19 | -0.25 | -0.60 |
| YDR087C    | RRP1       | 2468  | 2817  | 0.88 | -0.19 | -0.25 | -0.60 |
| YFL057C    |            | 5486  | 6263  | 0.88 | -0.19 | -0.25 | -0.60 |
| YGR232W    |            | 751   | 857   | 0.88 | -0.19 | -0.25 | -0.60 |
| YBR237W    | PRP5       | 5538  | 6323  | 0.88 | -0.19 | -0.25 | -0.60 |
| YBR144C    |            | 1756  | 2005  | 0.88 | -0.19 | -0.25 | -0.60 |
| YOLCdelta9 | YOLCdelta9 | 1448  | 1654  | 0.88 | -0.19 | -0.25 | -0.60 |
| YBR042C    |            | 10389 | 11867 | 0.88 | -0.19 | -0.25 | -0.60 |
| YIL015C-A  |            | 2682  | 3065  | 0.88 | -0.19 | -0.25 | -0.60 |
| YBL034C    | STU1       | 2083  | 2381  | 0.87 | -0.19 | -0.25 | -0.60 |
| YMR112C    | MED11      | 3290  | 3762  | 0.87 | -0.19 | -0.25 | -0.60 |
| YDR235W    | PRP42      | 1454  | 1663  | 0.87 | -0.19 | -0.25 | -0.60 |
| YNR072W    | HXT17      | 1067  | 1220  | 0.87 | -0.19 | -0.25 | -0.60 |
| YLR016C    |            | 1740  | 1990  | 0.87 | -0.19 | -0.25 | -0.60 |
| YOR030W    | DFG16      | 4176  | 4777  | 0.87 | -0.19 | -0.25 | -0.60 |
| YCL030C    | HIS4       | 1716  | 1963  | 0.87 | -0.19 | -0.25 | -0.60 |
| YJL020C    |            | 5356  | 6128  | 0.87 | -0.19 | -0.25 | -0.60 |
| YGL231C    |            | 3329  | 3809  | 0.87 | -0.19 | -0.25 | -0.61 |

|             |             |      |       |      |       |       |       |
|-------------|-------------|------|-------|------|-------|-------|-------|
| YBR084C-A   | RPL19A      | 2308 | 2641  | 0.87 | -0.19 | -0.25 | -0.61 |
| YJL114W     |             | 1082 | 1239  | 0.87 | -0.19 | -0.25 | -0.61 |
| YBL044W     |             | 3852 | 4409  | 0.87 | -0.19 | -0.25 | -0.61 |
| YGL088W     |             | 1047 | 1199  | 0.87 | -0.20 | -0.25 | -0.61 |
| YDR479C     |             | 3088 | 3535  | 0.87 | -0.20 | -0.25 | -0.61 |
| YDR535C     |             | 1194 | 1367  | 0.87 | -0.20 | -0.25 | -0.61 |
| YGRWdelta19 | YGRWdelta19 | 1911 | 2188  | 0.87 | -0.20 | -0.25 | -0.61 |
| YNR007C     | AUT1        | 3603 | 4127  | 0.87 | -0.20 | -0.25 | -0.61 |
| YIR036C     |             | 1333 | 1527  | 0.87 | -0.20 | -0.25 | -0.61 |
| YDR024W     |             | 3775 | 4325  | 0.87 | -0.20 | -0.25 | -0.61 |
| YILCdelta2  | YILCdelta2  | 5345 | 6123  | 0.87 | -0.20 | -0.25 | -0.61 |
| YCR020W-B   | YCR020W-B   | 2295 | 2629  | 0.87 | -0.20 | -0.25 | -0.61 |
| YPR062W     | FCY1        | 2572 | 2947  | 0.87 | -0.20 | -0.25 | -0.61 |
| YDR481C     | PHO8        | 1465 | 1679  | 0.87 | -0.20 | -0.25 | -0.61 |
| YKL208W     | CBT1        | 2842 | 3257  | 0.87 | -0.20 | -0.25 | -0.61 |
| YDL002C     | NHP10       | 2404 | 2755  | 0.87 | -0.20 | -0.25 | -0.61 |
| YMR174C     | PAI3        | 3866 | 4433  | 0.87 | -0.20 | -0.25 | -0.61 |
| YBR202W     | CDC47       | 3032 | 3477  | 0.87 | -0.20 | -0.25 | -0.61 |
| YDR139C     | RUB1        | 1533 | 1758  | 0.87 | -0.20 | -0.25 | -0.61 |
| YMR175W     | SIP18       | 6511 | 7467  | 0.87 | -0.20 | -0.25 | -0.61 |
| YHR102W     | NRK1        | 1781 | 2043  | 0.87 | -0.20 | -0.25 | -0.61 |
| YLR224W     |             | 1728 | 1982  | 0.87 | -0.20 | -0.25 | -0.61 |
| YBR124W     |             | 3199 | 3670  | 0.87 | -0.20 | -0.25 | -0.61 |
| YER184C     |             | 3812 | 4373  | 0.87 | -0.20 | -0.25 | -0.61 |
| YPR013C     |             | 1521 | 1745  | 0.87 | -0.20 | -0.25 | -0.61 |
| YLR219W     |             | 2146 | 2462  | 0.87 | -0.20 | -0.25 | -0.61 |
| YLR185W     | RPL37A      | 575  | 660   | 0.87 | -0.20 | -0.25 | -0.61 |
| YDR172W     | SUP35       | 1893 | 2172  | 0.87 | -0.20 | -0.25 | -0.62 |
| YCR086W     |             | 1125 | 1291  | 0.87 | -0.20 | -0.25 | -0.62 |
| YGL021W     | ALK1        | 8544 | 9806  | 0.87 | -0.20 | -0.25 | -0.62 |
| YER187W     |             | 2603 | 2988  | 0.87 | -0.20 | -0.25 | -0.62 |
| YDR526C     |             | 9669 | 11099 | 0.87 | -0.20 | -0.26 | -0.62 |
| YIL062C     | ARC15       | 2039 | 2341  | 0.87 | -0.20 | -0.26 | -0.62 |
| YGR141W     |             | 1499 | 1721  | 0.87 | -0.20 | -0.26 | -0.62 |
| YML028W     | TSA1        | 2631 | 3021  | 0.87 | -0.20 | -0.26 | -0.62 |
| YCR087W     |             | 1374 | 1578  | 0.87 | -0.20 | -0.26 | -0.62 |



|             |             |       |       |      |       |       |       |
|-------------|-------------|-------|-------|------|-------|-------|-------|
| YNL285W     |             | 1706  | 1959  | 0.87 | -0.20 | -0.26 | -0.62 |
| YOL109W     | ZEO1        | 1207  | 1387  | 0.87 | -0.20 | -0.26 | -0.62 |
| YBL101W-A   |             | 8311  | 9550  | 0.87 | -0.20 | -0.26 | -0.62 |
| YGR127W     |             | 2454  | 2821  | 0.87 | -0.20 | -0.26 | -0.62 |
| YJL028W     |             | 683   | 785   | 0.87 | -0.20 | -0.26 | -0.62 |
| YDR291W     |             | 633   | 728   | 0.87 | -0.20 | -0.26 | -0.62 |
| YHR214C-B   |             | 3959  | 4552  | 0.87 | -0.20 | -0.26 | -0.62 |
| YLL021W     | SPA2        | 5020  | 5772  | 0.87 | -0.20 | -0.26 | -0.62 |
| YDL200C     | MGT1        | 747   | 859   | 0.87 | -0.20 | -0.26 | -0.62 |
| YGR068C     |             | 608   | 699   | 0.87 | -0.20 | -0.26 | -0.62 |
| YIL068C     | SEC6        | 3079  | 3541  | 0.87 | -0.20 | -0.26 | -0.62 |
| YIR029W     | DAL2        | 873   | 1004  | 0.87 | -0.20 | -0.26 | -0.62 |
| YIR007W     |             | 716   | 823   | 0.87 | -0.20 | -0.26 | -0.62 |
| YOR026W     | BUB3        | 2508  | 2884  | 0.87 | -0.20 | -0.26 | -0.62 |
| YKL115C     |             | 2187  | 2515  | 0.87 | -0.20 | -0.26 | -0.62 |
| YDR512C     |             | 789   | 908   | 0.87 | -0.20 | -0.26 | -0.62 |
| YMR225C     | MRPL44      | 2395  | 2755  | 0.87 | -0.20 | -0.26 | -0.62 |
| YIL160C     | POT1        | 1574  | 1811  | 0.87 | -0.20 | -0.26 | -0.62 |
| YNL042W     | BOP3        | 5337  | 6141  | 0.87 | -0.20 | -0.26 | -0.62 |
| YBLWty2-1B  | YBLWty2-1B  | 10957 | 12608 | 0.87 | -0.20 | -0.26 | -0.62 |
| YJR053W     | BFA1        | 917   | 1055  | 0.87 | -0.20 | -0.26 | -0.63 |
| YDL177C     |             | 1820  | 2095  | 0.87 | -0.20 | -0.26 | -0.63 |
| YDR440W     | DOT1        | 3010  | 3466  | 0.87 | -0.20 | -0.26 | -0.63 |
| YMR074C     |             | 906   | 1043  | 0.87 | -0.20 | -0.26 | -0.63 |
| YER096W     | SHC1        | 668   | 770   | 0.87 | -0.20 | -0.26 | -0.63 |
| YDR439W     | LRS4        | 4250  | 4897  | 0.87 | -0.20 | -0.26 | -0.63 |
| YBR169C     | SSE2        | 3465  | 3993  | 0.87 | -0.20 | -0.26 | -0.63 |
| YHR052W     |             | 3122  | 3597  | 0.87 | -0.20 | -0.26 | -0.63 |
| YBL039C     | URA7        | 4053  | 4670  | 0.87 | -0.20 | -0.26 | -0.63 |
| YKR064W     |             | 2135  | 2460  | 0.87 | -0.20 | -0.26 | -0.63 |
| YGLWdelta10 | YGLWdelta10 | 2149  | 2477  | 0.87 | -0.20 | -0.26 | -0.63 |
| YML090W     |             | 621   | 716   | 0.87 | -0.20 | -0.26 | -0.63 |
| YGR263C     |             | 1248  | 1439  | 0.87 | -0.21 | -0.26 | -0.63 |
| YEL018W     |             | 1533  | 1767  | 0.87 | -0.21 | -0.26 | -0.63 |
| YHRWdelta9  | YHRWdelta9  | 3643  | 4202  | 0.87 | -0.21 | -0.26 | -0.63 |
| YDL193W     |             | 2657  | 3064  | 0.87 | -0.21 | -0.26 | -0.63 |

|         |        |      |      |      |       |       |       |
|---------|--------|------|------|------|-------|-------|-------|
| YLR100W |        | 2750 | 3172 | 0.87 | -0.21 | -0.26 | -0.63 |
| YFR047C |        | 2917 | 3366 | 0.87 | -0.21 | -0.26 | -0.63 |
| YML097C | VPS9   | 2205 | 2545 | 0.87 | -0.21 | -0.26 | -0.64 |
| YML117W |        | 5603 | 6467 | 0.87 | -0.21 | -0.26 | -0.64 |
| YLR387C |        | 2213 | 2555 | 0.87 | -0.21 | -0.26 | -0.64 |
| YBR179C | FZO1   | 8643 | 9978 | 0.87 | -0.21 | -0.26 | -0.64 |
| YGL250W |        | 1235 | 1426 | 0.87 | -0.21 | -0.26 | -0.64 |
| YPL176C |        | 1265 | 1461 | 0.87 | -0.21 | -0.26 | -0.64 |
| YJL008C | CCT8   | 2642 | 3051 | 0.87 | -0.21 | -0.26 | -0.64 |
| YLR129W | DIP2   | 2343 | 2706 | 0.87 | -0.21 | -0.26 | -0.64 |
| YKR080W | MTD1   | 1516 | 1751 | 0.87 | -0.21 | -0.26 | -0.64 |
| YIL129C | TAO3   | 1184 | 1368 | 0.87 | -0.21 | -0.26 | -0.64 |
| YOR024W |        | 1742 | 2013 | 0.87 | -0.21 | -0.26 | -0.64 |
| YGL067W |        | 4194 | 4846 | 0.87 | -0.21 | -0.26 | -0.64 |
| YBR120C | CBP6   | 1572 | 1816 | 0.87 | -0.21 | -0.26 | -0.64 |
| YPRO92W |        | 1167 | 1349 | 0.87 | -0.21 | -0.26 | -0.64 |
| YBR155W | CNS1   | 1564 | 1808 | 0.87 | -0.21 | -0.26 | -0.64 |
| YPL172C | COX10  | 1587 | 1835 | 0.87 | -0.21 | -0.27 | -0.64 |
| YBR288C | APM3   | 539  | 623  | 0.86 | -0.21 | -0.27 | -0.64 |
| YOR088W |        | 4495 | 5197 | 0.86 | -0.21 | -0.27 | -0.64 |
| YML077W | BET5   | 2049 | 2369 | 0.86 | -0.21 | -0.27 | -0.64 |
| YMR020W | FMS1   | 3209 | 3711 | 0.86 | -0.21 | -0.27 | -0.64 |
| YDR517W | GRH1   | 3042 | 3518 | 0.86 | -0.21 | -0.27 | -0.64 |
| YGR289C | MAL11  | 2020 | 2336 | 0.86 | -0.21 | -0.27 | -0.64 |
| YIL115C | NUP159 | 2258 | 2612 | 0.86 | -0.21 | -0.27 | -0.64 |
| YBL011W | SCT1   | 3034 | 3510 | 0.86 | -0.21 | -0.27 | -0.64 |
| YGR207C |        | 1121 | 1297 | 0.86 | -0.21 | -0.27 | -0.64 |
| YDR472W | TRS31  | 1623 | 1877 | 0.86 | -0.21 | -0.27 | -0.64 |
| YEL053C | MAK10  | 1758 | 2035 | 0.86 | -0.21 | -0.27 | -0.65 |
| YDL046W |        | 1781 | 2062 | 0.86 | -0.21 | -0.27 | -0.65 |
| YLR133W | CKI1   | 4146 | 4800 | 0.86 | -0.21 | -0.27 | -0.65 |
| YMR215W |        | 771  | 893  | 0.86 | -0.21 | -0.27 | -0.65 |
| YOR029W |        | 2000 | 2316 | 0.86 | -0.21 | -0.27 | -0.65 |
| YJL119C |        | 958  | 1109 | 0.86 | -0.21 | -0.27 | -0.65 |
| YDR356W | NUF1   | 5667 | 6563 | 0.86 | -0.21 | -0.27 | -0.65 |
| YBR212W | NGR1   | 6828 | 7908 | 0.86 | -0.21 | -0.27 | -0.65 |

|             |             |      |      |      |       |       |       |
|-------------|-------------|------|------|------|-------|-------|-------|
| YOL056W     | GPM3        | 2067 | 2394 | 0.86 | -0.21 | -0.27 | -0.65 |
| YOR343C     |             | 572  | 662  | 0.86 | -0.21 | -0.27 | -0.65 |
| YOR212W     | STE4        | 3709 | 4296 | 0.86 | -0.21 | -0.27 | -0.65 |
| YJR119C     |             | 4142 | 4799 | 0.86 | -0.21 | -0.27 | -0.65 |
| YBL107C     |             | 1079 | 1250 | 0.86 | -0.21 | -0.27 | -0.65 |
| YLR320W     |             | 1256 | 1455 | 0.86 | -0.21 | -0.27 | -0.65 |
| YDR469W     |             | 4698 | 5444 | 0.86 | -0.21 | -0.27 | -0.65 |
| YHR094C     | HXT1        | 3901 | 4521 | 0.86 | -0.21 | -0.27 | -0.65 |
| YBL001C     | ECM15       | 2269 | 2631 | 0.86 | -0.21 | -0.27 | -0.65 |
| YCR050C     |             | 2217 | 2571 | 0.86 | -0.21 | -0.27 | -0.65 |
| YLR012C     |             | 3438 | 3987 | 0.86 | -0.21 | -0.27 | -0.65 |
| YGR047C     | TFC4        | 3844 | 4460 | 0.86 | -0.21 | -0.27 | -0.65 |
| YGL093W     | SPC105      | 1940 | 2251 | 0.86 | -0.21 | -0.27 | -0.65 |
| YER016W     | BIM1        | 2370 | 2752 | 0.86 | -0.22 | -0.27 | -0.66 |
| YPL093W     | NOG1        | 1564 | 1817 | 0.86 | -0.22 | -0.27 | -0.66 |
| YGR271W     |             | 1332 | 1547 | 0.86 | -0.22 | -0.27 | -0.66 |
| YBR247C     | ENP1        | 1304 | 1515 | 0.86 | -0.22 | -0.27 | -0.66 |
| YJR129C     |             | 2792 | 3245 | 0.86 | -0.22 | -0.27 | -0.66 |
| YDR230W     |             | 1320 | 1534 | 0.86 | -0.22 | -0.27 | -0.66 |
| YMR108W     | ILV2        | 3360 | 3906 | 0.86 | -0.22 | -0.27 | -0.66 |
| YEL052W     | AFG1        | 4096 | 4762 | 0.86 | -0.22 | -0.27 | -0.66 |
| YBR259W     |             | 2427 | 2821 | 0.86 | -0.22 | -0.27 | -0.66 |
| YLR464W     |             | 2613 | 3038 | 0.86 | -0.22 | -0.27 | -0.66 |
| YPR099C     |             | 618  | 718  | 0.86 | -0.22 | -0.27 | -0.66 |
| YLR256W     | HAP1        | 5959 | 6930 | 0.86 | -0.22 | -0.27 | -0.66 |
| YBR100W     |             | 1339 | 1558 | 0.86 | -0.22 | -0.27 | -0.66 |
| YMR029C     |             | 1280 | 1489 | 0.86 | -0.22 | -0.27 | -0.66 |
| YKR033C     |             | 1016 | 1182 | 0.86 | -0.22 | -0.27 | -0.66 |
| YDL110C     |             | 2295 | 2670 | 0.86 | -0.22 | -0.27 | -0.66 |
| YBR146W     | MRPS9       | 2262 | 2632 | 0.86 | -0.22 | -0.27 | -0.66 |
| YHRCdelta11 | YHRCdelta11 | 689  | 802  | 0.86 | -0.22 | -0.28 | -0.66 |
| YBR128C     | APG14       | 812  | 946  | 0.86 | -0.22 | -0.28 | -0.67 |
| YLR255C     |             | 2809 | 3271 | 0.86 | -0.22 | -0.28 | -0.67 |
| YPL268W     | PLC1        | 1715 | 1997 | 0.86 | -0.22 | -0.28 | -0.67 |
| YDR299W     | BFR2        | 1522 | 1773 | 0.86 | -0.22 | -0.28 | -0.67 |
| YLR063W     |             | 2841 | 3310 | 0.86 | -0.22 | -0.28 | -0.67 |

|            |            |      |      |      |       |       |       |
|------------|------------|------|------|------|-------|-------|-------|
| YIL021W    | RPB3       | 3982 | 4641 | 0.86 | -0.22 | -0.28 | -0.67 |
| YDR083W    |            | 2506 | 2921 | 0.86 | -0.22 | -0.28 | -0.67 |
| YMR147W    |            | 2904 | 3384 | 0.86 | -0.22 | -0.28 | -0.67 |
| YHR050W    | SMF2       | 865  | 1008 | 0.86 | -0.22 | -0.28 | -0.67 |
| YNL331C    | AAD14      | 2095 | 2443 | 0.86 | -0.22 | -0.28 | -0.67 |
| YNL200C    |            | 1930 | 2251 | 0.86 | -0.22 | -0.28 | -0.67 |
| YBR088C    | POL30      | 8334 | 9720 | 0.86 | -0.22 | -0.28 | -0.67 |
| YKL052C    |            | 1820 | 2123 | 0.86 | -0.22 | -0.28 | -0.67 |
| YKR096W    |            | 2344 | 2735 | 0.86 | -0.22 | -0.28 | -0.67 |
| YPR077C    |            | 1452 | 1694 | 0.86 | -0.22 | -0.28 | -0.67 |
| YGL041C    |            | 2707 | 3160 | 0.86 | -0.22 | -0.28 | -0.67 |
| YMR242C    | RPL20A     | 1061 | 1238 | 0.86 | -0.22 | -0.28 | -0.67 |
| YAL059W    | ECM1       | 1480 | 1727 | 0.86 | -0.22 | -0.28 | -0.67 |
| YMR176W    | ECM5       | 984  | 1149 | 0.86 | -0.22 | -0.28 | -0.67 |
| YEL054C    | RPL12A     | 5102 | 5956 | 0.86 | -0.22 | -0.28 | -0.67 |
| YLR322W    |            | 811  | 947  | 0.86 | -0.22 | -0.28 | -0.67 |
| YOR168W    | GLN4       | 3675 | 4290 | 0.86 | -0.22 | -0.28 | -0.67 |
| YJL001W    | PRE3       | 1465 | 1711 | 0.86 | -0.22 | -0.28 | -0.68 |
| YOR054C    |            | 1337 | 1562 | 0.86 | -0.22 | -0.28 | -0.68 |
| YGR274C    | TAF145     | 4337 | 5069 | 0.86 | -0.22 | -0.28 | -0.68 |
| YPR104C    | FHL1       | 4251 | 4969 | 0.86 | -0.23 | -0.28 | -0.68 |
| YNL045W    |            | 3111 | 3637 | 0.86 | -0.23 | -0.28 | -0.68 |
| YHL020C    | OPI1       | 1791 | 2094 | 0.86 | -0.23 | -0.28 | -0.68 |
| YOR104W    |            | 2655 | 3105 | 0.86 | -0.23 | -0.28 | -0.68 |
| YLR058C    | SHM2       | 929  | 1086 | 0.86 | -0.23 | -0.28 | -0.68 |
| YPLCTy4-1C | YPLCTy4-1C | 835  | 977  | 0.86 | -0.23 | -0.28 | -0.68 |
| YBR234C    | ARC40      | 2480 | 2901 | 0.85 | -0.23 | -0.28 | -0.68 |
| YDR071C    |            | 2471 | 2892 | 0.85 | -0.23 | -0.28 | -0.68 |
| YLR117C    | SYF3       | 4661 | 5454 | 0.85 | -0.23 | -0.28 | -0.68 |
| YJL184W    |            | 1315 | 1539 | 0.85 | -0.23 | -0.28 | -0.68 |
| YNL016W    | PUB1       | 877  | 1026 | 0.85 | -0.23 | -0.28 | -0.68 |
| YEL049W    | PAU2       | 2170 | 2540 | 0.85 | -0.23 | -0.28 | -0.68 |
| YKL082C    |            | 3147 | 3684 | 0.85 | -0.23 | -0.28 | -0.68 |
| YBR130C    | SHE3       | 2511 | 2940 | 0.85 | -0.23 | -0.28 | -0.68 |
| YLR363C    | NMD4       | 878  | 1028 | 0.85 | -0.23 | -0.28 | -0.69 |
| YDR195W    | REF2       | 1746 | 2045 | 0.85 | -0.23 | -0.28 | -0.69 |

|            |            |      |      |      |       |       |       |
|------------|------------|------|------|------|-------|-------|-------|
| YNR004W    |            | 2183 | 2557 | 0.85 | -0.23 | -0.28 | -0.69 |
| YBL071C    |            | 1343 | 1573 | 0.85 | -0.23 | -0.28 | -0.69 |
| YHR065C    | RRP3       | 2792 | 3271 | 0.85 | -0.23 | -0.28 | -0.69 |
| YDL170W    | UGA3       | 1131 | 1325 | 0.85 | -0.23 | -0.28 | -0.69 |
| YOL067C    | RTG1       | 969  | 1135 | 0.85 | -0.23 | -0.28 | -0.69 |
| YPL022W    | RAD1       | 1871 | 2192 | 0.85 | -0.23 | -0.28 | -0.69 |
| YMR013C    | SEC59      | 2090 | 2449 | 0.85 | -0.23 | -0.28 | -0.69 |
| YLR065C    |            | 1271 | 1490 | 0.85 | -0.23 | -0.29 | -0.69 |
| YNL227C    |            | 638  | 748  | 0.85 | -0.23 | -0.29 | -0.69 |
| YFL012W    |            | 2876 | 3371 | 0.85 | -0.23 | -0.29 | -0.69 |
| YGL263W    | COS12      | 398  | 467  | 0.85 | -0.23 | -0.29 | -0.69 |
| YFR046C    |            | 8457 | 9915 | 0.85 | -0.23 | -0.29 | -0.69 |
| YJR021C    | REC107     | 2031 | 2381 | 0.85 | -0.23 | -0.29 | -0.69 |
| YMR141C    |            | 1240 | 1454 | 0.85 | -0.23 | -0.29 | -0.69 |
| YIL101C    | XBP1       | 798  | 936  | 0.85 | -0.23 | -0.29 | -0.69 |
| YDL181W    | INH1       | 869  | 1020 | 0.85 | -0.23 | -0.29 | -0.69 |
| YOL001W    | PHO80      | 786  | 922  | 0.85 | -0.23 | -0.29 | -0.69 |
| YHLWdelta2 | YHLWdelta2 | 989  | 1161 | 0.85 | -0.23 | -0.29 | -0.69 |
| YMR075W    |            | 2516 | 2953 | 0.85 | -0.23 | -0.29 | -0.69 |
| YMR059W    | SEN15      | 883  | 1036 | 0.85 | -0.23 | -0.29 | -0.69 |
| YDR476C    |            | 911  | 1069 | 0.85 | -0.23 | -0.29 | -0.69 |
| YMR136W    | GAT2       | 1106 | 1298 | 0.85 | -0.23 | -0.29 | -0.69 |
| YGL101W    |            | 442  | 519  | 0.85 | -0.23 | -0.29 | -0.70 |
| YKR078W    |            | 2262 | 2658 | 0.85 | -0.23 | -0.29 | -0.70 |
| YDR514C    |            | 2207 | 2594 | 0.85 | -0.23 | -0.29 | -0.70 |
| YJL047C    | RTT101     | 5306 | 6236 | 0.85 | -0.23 | -0.29 | -0.70 |
| YDL140C    | RPO21      | 4047 | 4756 | 0.85 | -0.23 | -0.29 | -0.70 |
| YPR130C    |            | 2351 | 2764 | 0.85 | -0.23 | -0.29 | -0.70 |
| YBR089W    |            | 1336 | 1570 | 0.85 | -0.23 | -0.29 | -0.70 |
| YEL039C    | CYC7       | 618  | 726  | 0.85 | -0.23 | -0.29 | -0.70 |
| YLR143W    |            | 1879 | 2210 | 0.85 | -0.23 | -0.29 | -0.70 |
| YOR017W    | PET127     | 1590 | 1870 | 0.85 | -0.23 | -0.29 | -0.70 |
| YCL009C    | ILV6       | 1483 | 1745 | 0.85 | -0.23 | -0.29 | -0.70 |
| YDL067C    | COX9       | 1166 | 1372 | 0.85 | -0.23 | -0.29 | -0.70 |
| YDR511W    |            | 4738 | 5575 | 0.85 | -0.23 | -0.29 | -0.70 |
| YDR136C    |            | 2085 | 2454 | 0.85 | -0.24 | -0.29 | -0.70 |

|           |       |       |       |      |       |       |       |
|-----------|-------|-------|-------|------|-------|-------|-------|
| YFR017C   |       | 763   | 898   | 0.85 | -0.24 | -0.29 | -0.70 |
| YCL020W   |       | 17680 | 20820 | 0.85 | -0.24 | -0.29 | -0.71 |
| YMR153W   | NUP53 | 3166  | 3729  | 0.85 | -0.24 | -0.29 | -0.71 |
| YNL327W   | EGT2  | 7012  | 8258  | 0.85 | -0.24 | -0.29 | -0.71 |
| YKL201C   | MNN4  | 942   | 1110  | 0.85 | -0.24 | -0.29 | -0.71 |
| YNL038W   |       | 3046  | 3590  | 0.85 | -0.24 | -0.29 | -0.71 |
| YGR069W   |       | 2848  | 3356  | 0.85 | -0.24 | -0.29 | -0.71 |
| YLR017W   | MEU1  | 2816  | 3319  | 0.85 | -0.24 | -0.29 | -0.71 |
| YOR306C   |       | 1729  | 2038  | 0.85 | -0.24 | -0.29 | -0.71 |
| YDL057W   |       | 2171  | 2559  | 0.85 | -0.24 | -0.29 | -0.71 |
| YGL119W   | ABC1  | 1328  | 1566  | 0.85 | -0.24 | -0.29 | -0.71 |
| YDR409W   |       | 2661  | 3138  | 0.85 | -0.24 | -0.29 | -0.71 |
| YLL040C   | VPS13 | 1369  | 1615  | 0.85 | -0.24 | -0.29 | -0.71 |
| YBR180W   |       | 2686  | 3168  | 0.85 | -0.24 | -0.29 | -0.71 |
| YLR307W   | CDA1  | 2178  | 2570  | 0.85 | -0.24 | -0.29 | -0.71 |
| YJL089W   | SIP4  | 1259  | 1486  | 0.85 | -0.24 | -0.29 | -0.71 |
| YDR378C   | LSM6  | 1217  | 1436  | 0.85 | -0.24 | -0.29 | -0.71 |
| YDL189W   |       | 2391  | 2822  | 0.85 | -0.24 | -0.29 | -0.71 |
| YIR032C   | DAL3  | 1956  | 2308  | 0.85 | -0.24 | -0.30 | -0.71 |
| YGR206W   |       | 1879  | 2218  | 0.85 | -0.24 | -0.30 | -0.71 |
| YBL095W   |       | 1419  | 1675  | 0.85 | -0.24 | -0.30 | -0.71 |
| YDR330W   |       | 804   | 949   | 0.85 | -0.24 | -0.30 | -0.71 |
| YGR140W   | CBF2  | 3113  | 3675  | 0.85 | -0.24 | -0.30 | -0.71 |
| YDR445C   |       | 386   | 456   | 0.85 | -0.24 | -0.30 | -0.71 |
| YNL212W   |       | 1221  | 1441  | 0.85 | -0.24 | -0.30 | -0.71 |
| YNL223W   | AUT2  | 1888  | 2229  | 0.85 | -0.24 | -0.30 | -0.71 |
| YPR051W   | MAK3  | 907   | 1071  | 0.85 | -0.24 | -0.30 | -0.71 |
| YBR116C   |       | 1152  | 1360  | 0.85 | -0.24 | -0.30 | -0.72 |
| YMR317W   |       | 670   | 791   | 0.85 | -0.24 | -0.30 | -0.72 |
| YCR064C   |       | 2537  | 2997  | 0.85 | -0.24 | -0.30 | -0.72 |
| YBL040C   | ERD2  | 3326  | 3930  | 0.85 | -0.24 | -0.30 | -0.72 |
| YER035W   |       | 464   | 548   | 0.85 | -0.24 | -0.30 | -0.72 |
| YLL009C   | COX17 | 618   | 730   | 0.85 | -0.24 | -0.30 | -0.72 |
| YFL014W   | HSP12 | 1349  | 1595  | 0.85 | -0.24 | -0.30 | -0.72 |
| YMR153C-A |       | 2210  | 2613  | 0.85 | -0.24 | -0.30 | -0.72 |
| YOL134C   |       | 392   | 464   | 0.85 | -0.24 | -0.30 | -0.72 |

|            |            |      |       |      |       |       |       |
|------------|------------|------|-------|------|-------|-------|-------|
| YPL104W    | MSD1       | 1303 | 1541  | 0.85 | -0.24 | -0.30 | -0.72 |
| YDL103C    | QRI1       | 653  | 772   | 0.85 | -0.24 | -0.30 | -0.72 |
| YGR053C    |            | 1240 | 1467  | 0.85 | -0.24 | -0.30 | -0.72 |
| YHR095W    |            | 1998 | 2364  | 0.85 | -0.24 | -0.30 | -0.72 |
| YJR003C    |            | 1290 | 1526  | 0.85 | -0.24 | -0.30 | -0.72 |
| YPL125W    |            | 1883 | 2229  | 0.84 | -0.24 | -0.30 | -0.72 |
| YDR003W    |            | 483  | 572   | 0.84 | -0.24 | -0.30 | -0.72 |
| YLR036C    |            | 1770 | 2096  | 0.84 | -0.24 | -0.30 | -0.72 |
| YHR138C    |            | 2814 | 3332  | 0.84 | -0.24 | -0.30 | -0.72 |
| YBL108W    |            | 1298 | 1537  | 0.84 | -0.24 | -0.30 | -0.72 |
| YFLO18W-A  |            | 3486 | 4128  | 0.84 | -0.24 | -0.30 | -0.72 |
| YDR267C    |            | 2746 | 3252  | 0.84 | -0.24 | -0.30 | -0.72 |
| YOR013W    |            | 578  | 684   | 0.84 | -0.24 | -0.30 | -0.72 |
| YDR153C    |            | 2971 | 3520  | 0.84 | -0.24 | -0.30 | -0.73 |
| YDR459C    |            | 501  | 594   | 0.84 | -0.24 | -0.30 | -0.73 |
| YPL283C    | YRF1-7     | 3882 | 4600  | 0.84 | -0.24 | -0.30 | -0.73 |
| YKL175W    |            | 2385 | 2827  | 0.84 | -0.25 | -0.30 | -0.73 |
| YNR054C    |            | 1258 | 1491  | 0.84 | -0.25 | -0.30 | -0.73 |
| YPL136W    |            | 2129 | 2524  | 0.84 | -0.25 | -0.30 | -0.73 |
| YGL124C    |            | 1997 | 2368  | 0.84 | -0.25 | -0.30 | -0.73 |
| YLR420W    | URA4       | 1486 | 1762  | 0.84 | -0.25 | -0.30 | -0.73 |
| YGR064W    |            | 1033 | 1225  | 0.84 | -0.25 | -0.30 | -0.73 |
| YLL037W    |            | 2682 | 3181  | 0.84 | -0.25 | -0.30 | -0.73 |
| YHR117W    | TOM71      | 3700 | 4389  | 0.84 | -0.25 | -0.30 | -0.73 |
| YMR303C    | ADH2       | 2436 | 2890  | 0.84 | -0.25 | -0.30 | -0.73 |
| YPL092W    | SSU1       | 1949 | 2313  | 0.84 | -0.25 | -0.30 | -0.73 |
| YDR344C    |            | 604  | 717   | 0.84 | -0.25 | -0.30 | -0.73 |
| YKLCdelta6 | YKLCdelta6 | 2293 | 2722  | 0.84 | -0.25 | -0.30 | -0.73 |
| YCR073C    | SSK22      | 9353 | 11101 | 0.84 | -0.25 | -0.30 | -0.73 |
| YLR457C    | NBP1       | 532  | 631   | 0.84 | -0.25 | -0.30 | -0.73 |
| YOL113W    | SKM1       | 573  | 680   | 0.84 | -0.25 | -0.30 | -0.73 |
| YGL094C    | PAN2       | 666  | 791   | 0.84 | -0.25 | -0.30 | -0.74 |
| YJR083C    |            | 3750 | 4455  | 0.84 | -0.25 | -0.30 | -0.74 |
| YHL008C    |            | 406  | 482   | 0.84 | -0.25 | -0.30 | -0.74 |
| YCL051W    | LRE1       | 438  | 521   | 0.84 | -0.25 | -0.31 | -0.74 |
| YDR308C    | SRB7       | 2693 | 3201  | 0.84 | -0.25 | -0.31 | -0.74 |

|            |            |       |       |      |       |       |       |
|------------|------------|-------|-------|------|-------|-------|-------|
| YOL110W    | SHR5       | 2086  | 2480  | 0.84 | -0.25 | -0.31 | -0.74 |
| YDL010W    |            | 2068  | 2459  | 0.84 | -0.25 | -0.31 | -0.74 |
| YDL113C    |            | 1563  | 1859  | 0.84 | -0.25 | -0.31 | -0.74 |
| YCL037C    | SRO9       | 3808  | 4530  | 0.84 | -0.25 | -0.31 | -0.74 |
| YJR109C    | CPA2       | 2339  | 2783  | 0.84 | -0.25 | -0.31 | -0.74 |
| YDR039C    | ENA2       | 810   | 964   | 0.84 | -0.25 | -0.31 | -0.74 |
| YJR136C    |            | 659   | 784   | 0.84 | -0.25 | -0.31 | -0.74 |
| YDR518W    | EUG1       | 4174  | 4968  | 0.84 | -0.25 | -0.31 | -0.74 |
| YDR167W    | TAF25      | 1207  | 1437  | 0.84 | -0.25 | -0.31 | -0.74 |
| YPL142C    |            | 5844  | 6956  | 0.84 | -0.25 | -0.31 | -0.74 |
| YNR043W    | MVD1       | 3116  | 3709  | 0.84 | -0.25 | -0.31 | -0.74 |
| YBR285W    |            | 3829  | 4559  | 0.84 | -0.25 | -0.31 | -0.74 |
| YDR216W    | ADR1       | 4403  | 5243  | 0.84 | -0.25 | -0.31 | -0.74 |
| YKL053W    |            | 1773  | 2112  | 0.84 | -0.25 | -0.31 | -0.75 |
| YDL096C    |            | 4929  | 5875  | 0.84 | -0.25 | -0.31 | -0.75 |
| YPR204W    |            | 2525  | 3009  | 0.84 | -0.25 | -0.31 | -0.75 |
| YDR448W    | ADA2       | 1185  | 1413  | 0.84 | -0.25 | -0.31 | -0.75 |
| YER188W    |            | 1619  | 1930  | 0.84 | -0.25 | -0.31 | -0.75 |
| YLR022C    |            | 1373  | 1637  | 0.84 | -0.25 | -0.31 | -0.75 |
| YHRCTy1-1A | YHRCTy1-1A | 10264 | 12239 | 0.84 | -0.25 | -0.31 | -0.75 |
| YCR060W    |            | 4117  | 4909  | 0.84 | -0.25 | -0.31 | -0.75 |
| YCRX06W    |            | 2408  | 2873  | 0.84 | -0.25 | -0.31 | -0.75 |
| YNL185C    | MRPL19     | 2278  | 2717  | 0.84 | -0.25 | -0.31 | -0.75 |
| YBR070C    |            | 820   | 978   | 0.84 | -0.25 | -0.31 | -0.75 |
| YMR047C    | NUP116     | 3760  | 4489  | 0.84 | -0.26 | -0.31 | -0.75 |
| YKL062W    | MSN4       | 1233  | 1472  | 0.84 | -0.26 | -0.31 | -0.75 |
| YPL007C    |            | 1808  | 2159  | 0.84 | -0.26 | -0.31 | -0.75 |
| YDL045C    | FAD1       | 1894  | 2262  | 0.84 | -0.26 | -0.31 | -0.75 |
| YIL020C    | HIS6       | 2865  | 3423  | 0.84 | -0.26 | -0.31 | -0.76 |
| YML067C    |            | 526   | 628   | 0.84 | -0.26 | -0.31 | -0.76 |
| YBR298C    | MAL31      | 2210  | 2641  | 0.84 | -0.26 | -0.31 | -0.76 |
| YAL019W    | FUN30      | 5462  | 6528  | 0.84 | -0.26 | -0.31 | -0.76 |
| YMR181C    |            | 2486  | 2971  | 0.84 | -0.26 | -0.31 | -0.76 |
| YDR515W    | SLF1       | 1882  | 2250  | 0.84 | -0.26 | -0.31 | -0.76 |
| YDR103W    | STE5       | 2951  | 3529  | 0.84 | -0.26 | -0.31 | -0.76 |
| YJL051W    |            | 1607  | 1922  | 0.84 | -0.26 | -0.31 | -0.76 |



|           |       |      |      |      |       |       |       |
|-----------|-------|------|------|------|-------|-------|-------|
| YBR134W   |       | 4134 | 4945 | 0.84 | -0.26 | -0.31 | -0.76 |
| YLR198C   |       | 3676 | 4398 | 0.84 | -0.26 | -0.31 | -0.76 |
| YGR032W   | GSC2  | 4415 | 5287 | 0.84 | -0.26 | -0.32 | -0.76 |
| YPL253C   | VIK1  | 3451 | 4133 | 0.83 | -0.26 | -0.32 | -0.76 |
| YIL099W   | SGA1  | 492  | 589  | 0.83 | -0.26 | -0.32 | -0.77 |
| YMR026C   | PEX12 | 320  | 383  | 0.83 | -0.26 | -0.32 | -0.77 |
| YNL071W   | LAT1  | 2261 | 2709 | 0.83 | -0.26 | -0.32 | -0.77 |
| YCRX15W   |       | 812  | 974  | 0.83 | -0.26 | -0.32 | -0.77 |
| YER166W   |       | 601  | 720  | 0.83 | -0.26 | -0.32 | -0.77 |
| YBR147W   |       | 6914 | 8289 | 0.83 | -0.26 | -0.32 | -0.77 |
| YHR178W   | STB5  | 7230 | 8670 | 0.83 | -0.26 | -0.32 | -0.77 |
| YOL154W   |       | 2453 | 2942 | 0.83 | -0.26 | -0.32 | -0.77 |
| YGR014W   | MSB2  | 3647 | 4374 | 0.83 | -0.26 | -0.32 | -0.77 |
| YAR035W   | YAT1  | 3502 | 4201 | 0.83 | -0.26 | -0.32 | -0.77 |
| YFL051C   |       | 1139 | 1367 | 0.83 | -0.26 | -0.32 | -0.77 |
| YDR176W   | NGG1  | 1690 | 2028 | 0.83 | -0.26 | -0.32 | -0.77 |
| YGL125W   | MET13 | 1642 | 1970 | 0.83 | -0.26 | -0.32 | -0.77 |
| YDL081C   | RPP1A | 1206 | 1447 | 0.83 | -0.26 | -0.32 | -0.77 |
| YPL171C   | OYE3  | 582  | 699  | 0.83 | -0.26 | -0.32 | -0.77 |
| YDL130W   | RPP1B | 1947 | 2337 | 0.83 | -0.26 | -0.32 | -0.77 |
| YGR144W   | THI4  | 530  | 637  | 0.83 | -0.26 | -0.32 | -0.77 |
| YHR145C   |       | 961  | 1155 | 0.83 | -0.26 | -0.32 | -0.77 |
| YGR203W   |       | 495  | 595  | 0.83 | -0.26 | -0.32 | -0.77 |
| YML100W-A |       | 929  | 1116 | 0.83 | -0.27 | -0.32 | -0.78 |
| YEL065W   | SIT1  | 1740 | 2091 | 0.83 | -0.27 | -0.32 | -0.78 |
| YJL082W   | IML2  | 1629 | 1958 | 0.83 | -0.27 | -0.32 | -0.78 |
| YCR008W   | SAT4  | 1394 | 1676 | 0.83 | -0.27 | -0.32 | -0.78 |
| YKL084W   |       | 4229 | 5087 | 0.83 | -0.27 | -0.32 | -0.78 |
| YGL121C   |       | 889  | 1069 | 0.83 | -0.27 | -0.32 | -0.78 |
| YHR173C   |       | 952  | 1145 | 0.83 | -0.27 | -0.32 | -0.78 |
| YDL158C   |       | 4693 | 5647 | 0.83 | -0.27 | -0.32 | -0.78 |
| YMR135W-A |       | 1267 | 1524 | 0.83 | -0.27 | -0.32 | -0.78 |
| YNL137C   | NAM9  | 773  | 930  | 0.83 | -0.27 | -0.32 | -0.78 |
| YDR010C   |       | 648  | 780  | 0.83 | -0.27 | -0.32 | -0.78 |
| YDL017W   | CDC7  | 2684 | 3234 | 0.83 | -0.27 | -0.32 | -0.78 |
| YDL044C   | MTF2  | 1609 | 1939 | 0.83 | -0.27 | -0.33 | -0.79 |

|            |            |       |       |      |       |       |       |
|------------|------------|-------|-------|------|-------|-------|-------|
| YDL028C    | MPS1       | 1993  | 2402  | 0.83 | -0.27 | -0.33 | -0.79 |
| YGL117W    |            | 1570  | 1893  | 0.83 | -0.27 | -0.33 | -0.79 |
| YBR114W    | RAD16      | 2450  | 2953  | 0.83 | -0.27 | -0.33 | -0.79 |
| YMR109W    | MYO5       | 2180  | 2630  | 0.83 | -0.27 | -0.33 | -0.79 |
| YDR462W    | MRPL28     | 3139  | 3788  | 0.83 | -0.27 | -0.33 | -0.79 |
| YGL144C    |            | 3910  | 4719  | 0.83 | -0.27 | -0.33 | -0.79 |
| YBR226C    |            | 826   | 997   | 0.83 | -0.27 | -0.33 | -0.79 |
| YHR129C    | ARP1       | 1866  | 2253  | 0.83 | -0.27 | -0.33 | -0.79 |
| YDR329C    | PEX3       | 5868  | 7087  | 0.83 | -0.27 | -0.33 | -0.79 |
| YDR355C    |            | 2267  | 2738  | 0.83 | -0.27 | -0.33 | -0.79 |
| YBL041W    | PRE7       | 1883  | 2275  | 0.83 | -0.27 | -0.33 | -0.79 |
| YIL048W    | NEO1       | 3211  | 3881  | 0.83 | -0.27 | -0.33 | -0.80 |
| YDL197C    | ASF2       | 1076  | 1301  | 0.83 | -0.27 | -0.33 | -0.80 |
| YOR217W    | RFC1       | 4291  | 5187  | 0.83 | -0.27 | -0.33 | -0.80 |
| YDR523C    | SPS1       | 3116  | 3766  | 0.83 | -0.27 | -0.33 | -0.80 |
| YBL008W    | HIR1       | 6621  | 8005  | 0.83 | -0.27 | -0.33 | -0.80 |
| YJL168C    | SET2       | 2562  | 3099  | 0.83 | -0.27 | -0.33 | -0.80 |
| YFL013W-A  |            | 1373  | 1661  | 0.83 | -0.27 | -0.33 | -0.80 |
| YCLCdelta1 | YCLCdelta1 | 1550  | 1875  | 0.83 | -0.27 | -0.33 | -0.80 |
| YBL057C    |            | 1245  | 1506  | 0.83 | -0.27 | -0.33 | -0.80 |
| YDL239C    |            | 1005  | 1216  | 0.83 | -0.27 | -0.33 | -0.80 |
| YPL083C    | SEN54      | 1129  | 1366  | 0.83 | -0.28 | -0.33 | -0.80 |
| YPR088C    | SRP54      | 2853  | 3454  | 0.83 | -0.28 | -0.33 | -0.80 |
| YGL217C    |            | 1700  | 2059  | 0.83 | -0.28 | -0.33 | -0.80 |
| YMR161W    | HLJ1       | 4793  | 5806  | 0.83 | -0.28 | -0.33 | -0.80 |
| YJLWdelta9 | YJLWdelta9 | 3973  | 4813  | 0.83 | -0.28 | -0.33 | -0.80 |
| YOR291W    |            | 557   | 675   | 0.83 | -0.28 | -0.33 | -0.81 |
| YNL183C    | NPR1       | 3947  | 4784  | 0.83 | -0.28 | -0.33 | -0.81 |
| YPL184C    |            | 2447  | 2966  | 0.83 | -0.28 | -0.33 | -0.81 |
| YKL210W    | UBA1       | 1028  | 1246  | 0.83 | -0.28 | -0.33 | -0.81 |
| YDR084C    |            | 2750  | 3333  | 0.83 | -0.28 | -0.33 | -0.81 |
| YGR112W    | SHY1       | 1403  | 1701  | 0.83 | -0.28 | -0.33 | -0.81 |
| YOL058W    | ARG1       | 898   | 1089  | 0.83 | -0.28 | -0.33 | -0.81 |
| YPR175W    | DPB2       | 1685  | 2044  | 0.82 | -0.28 | -0.33 | -0.81 |
| YML040W    |            | 16197 | 19645 | 0.82 | -0.28 | -0.33 | -0.81 |
| YLR292C    | SEC72      | 903   | 1096  | 0.82 | -0.28 | -0.34 | -0.81 |

|         |       |       |       |      |       |       |       |
|---------|-------|-------|-------|------|-------|-------|-------|
| YIL149C |       | 2810  | 3410  | 0.82 | -0.28 | -0.34 | -0.81 |
| YDR100W |       | 2149  | 2608  | 0.82 | -0.28 | -0.34 | -0.81 |
| YDR318W | MCM21 | 1499  | 1819  | 0.82 | -0.28 | -0.34 | -0.81 |
| YGR258C | RAD2  | 2291  | 2780  | 0.82 | -0.28 | -0.34 | -0.81 |
| YJR118C | ILM1  | 1940  | 2354  | 0.82 | -0.28 | -0.34 | -0.81 |
| YDR121W | DPB4  | 1675  | 2033  | 0.82 | -0.28 | -0.34 | -0.81 |
| YPL213W | LEA1  | 407   | 494   | 0.82 | -0.28 | -0.34 | -0.81 |
| YMR101C | SRT1  | 3152  | 3828  | 0.82 | -0.28 | -0.34 | -0.81 |
| YGR158C | MTR3  | 1739  | 2112  | 0.82 | -0.28 | -0.34 | -0.81 |
| YCR074C |       | 936   | 1137  | 0.82 | -0.28 | -0.34 | -0.81 |
| YNL135C | FPR1  | 2177  | 2645  | 0.82 | -0.28 | -0.34 | -0.81 |
| YML093W |       | 1863  | 2264  | 0.82 | -0.28 | -0.34 | -0.81 |
| YKL105C |       | 3037  | 3690  | 0.82 | -0.28 | -0.34 | -0.81 |
| YLR083C | EMP70 | 4760  | 5785  | 0.82 | -0.28 | -0.34 | -0.82 |
| YDR268W | MSW1  | 2629  | 3195  | 0.82 | -0.28 | -0.34 | -0.82 |
| YBR115C | LYS2  | 3055  | 3714  | 0.82 | -0.28 | -0.34 | -0.82 |
| YOL093W |       | 748   | 910   | 0.82 | -0.28 | -0.34 | -0.82 |
| YLL006W | MMM1  | 2152  | 2617  | 0.82 | -0.28 | -0.34 | -0.82 |
| YMR140W |       | 1360  | 1654  | 0.82 | -0.28 | -0.34 | -0.82 |
| YPL008W | CHL1  | 1567  | 1906  | 0.82 | -0.28 | -0.34 | -0.82 |
| YOL087C |       | 2155  | 2622  | 0.82 | -0.28 | -0.34 | -0.82 |
| YILO43C | CBR1  | 2636  | 3207  | 0.82 | -0.28 | -0.34 | -0.82 |
| YCRX11W |       | 678   | 825   | 0.82 | -0.28 | -0.34 | -0.82 |
| YPL178W | MUD13 | 2813  | 3423  | 0.82 | -0.28 | -0.34 | -0.82 |
| YPR038W |       | 440   | 535   | 0.82 | -0.28 | -0.34 | -0.82 |
| YKL083W |       | 1066  | 1298  | 0.82 | -0.28 | -0.34 | -0.82 |
| YDR437W |       | 3740  | 4558  | 0.82 | -0.29 | -0.34 | -0.82 |
| YNL208W |       | 1145  | 1396  | 0.82 | -0.29 | -0.34 | -0.82 |
| YBR086C | IST2  | 5486  | 6687  | 0.82 | -0.29 | -0.34 | -0.83 |
| YDR332W |       | 1724  | 2102  | 0.82 | -0.29 | -0.34 | -0.83 |
| YGR259C |       | 3079  | 3755  | 0.82 | -0.29 | -0.34 | -0.83 |
| YLL017W |       | 937   | 1143  | 0.82 | -0.29 | -0.34 | -0.83 |
| YBR058C | UBP14 | 10701 | 13052 | 0.82 | -0.29 | -0.34 | -0.83 |
| YIRO38C | GTT1  | 970   | 1183  | 0.82 | -0.29 | -0.34 | -0.83 |
| YIRO30C | DCG1  | 1023  | 1248  | 0.82 | -0.29 | -0.34 | -0.83 |
| YLR271W |       | 1919  | 2341  | 0.82 | -0.29 | -0.34 | -0.83 |

|             |             |      |      |      |       |       |       |
|-------------|-------------|------|------|------|-------|-------|-------|
| YGR188C     | BUB1        | 3409 | 4158 | 0.82 | -0.29 | -0.34 | -0.83 |
| YNR037C     |             | 823  | 1005 | 0.82 | -0.29 | -0.34 | -0.83 |
| YDR257C     | RMS1        | 1722 | 2102 | 0.82 | -0.29 | -0.34 | -0.83 |
| YCR054C     | CTR86       | 1537 | 1876 | 0.82 | -0.29 | -0.34 | -0.83 |
| YHR051W     | COX6        | 1257 | 1535 | 0.82 | -0.29 | -0.34 | -0.83 |
| YER119C-A   |             | 2414 | 2949 | 0.82 | -0.29 | -0.34 | -0.83 |
| YMR132C     |             | 1941 | 2371 | 0.82 | -0.29 | -0.34 | -0.83 |
| YBLWdelta10 | YBLWdelta10 | 6523 | 7969 | 0.82 | -0.29 | -0.35 | -0.83 |
| YGR137W     |             | 2201 | 2690 | 0.82 | -0.29 | -0.35 | -0.83 |
| YDR509W     |             | 1136 | 1388 | 0.82 | -0.29 | -0.35 | -0.83 |
| YCL032W     | STE50       | 3831 | 4686 | 0.82 | -0.29 | -0.35 | -0.84 |
| YGL085W     |             | 2360 | 2887 | 0.82 | -0.29 | -0.35 | -0.84 |
| YCRX08W     |             | 2319 | 2837 | 0.82 | -0.29 | -0.35 | -0.84 |
| YGR236C     |             | 1460 | 1787 | 0.82 | -0.29 | -0.35 | -0.84 |
| YOR055W     |             | 533  | 652  | 0.82 | -0.29 | -0.35 | -0.84 |
| YLR275W     | SMD2        | 507  | 621  | 0.82 | -0.29 | -0.35 | -0.84 |
| YHR108W     |             | 748  | 916  | 0.82 | -0.29 | -0.35 | -0.84 |
| YMR279C     |             | 2229 | 2729 | 0.82 | -0.29 | -0.35 | -0.84 |
| YARCdelta3  | YARCdelta3  | 700  | 857  | 0.82 | -0.29 | -0.35 | -0.84 |
| YBL029W     |             | 737  | 903  | 0.82 | -0.29 | -0.35 | -0.84 |
| YBR101C     |             | 4181 | 5121 | 0.82 | -0.29 | -0.35 | -0.84 |
| YCL035C     | GRX1        | 1288 | 1578 | 0.82 | -0.29 | -0.35 | -0.84 |
| YPL282C     |             | 2769 | 3392 | 0.82 | -0.29 | -0.35 | -0.84 |
| YML107C     |             | 1834 | 2248 | 0.82 | -0.29 | -0.35 | -0.84 |
| YOR336W     | KRE5        | 2244 | 2750 | 0.82 | -0.29 | -0.35 | -0.84 |
| YDR287W     |             | 763  | 935  | 0.82 | -0.29 | -0.35 | -0.84 |
| YDL183C     |             | 1270 | 1557 | 0.82 | -0.29 | -0.35 | -0.84 |
| YGR241C     | YAP1802     | 1045 | 1281 | 0.82 | -0.29 | -0.35 | -0.85 |
| YHR132C     | ECM14       | 1964 | 2408 | 0.82 | -0.29 | -0.35 | -0.85 |
| YDR114C     |             | 630  | 772  | 0.82 | -0.29 | -0.35 | -0.85 |
| YFR005C     | SAD1        | 2676 | 3281 | 0.82 | -0.29 | -0.35 | -0.85 |
| YER053C     |             | 475  | 582  | 0.82 | -0.29 | -0.35 | -0.85 |
| YPL169C     | MEX67       | 3989 | 4891 | 0.82 | -0.29 | -0.35 | -0.85 |
| YLR102C     | APC9        | 1172 | 1438 | 0.82 | -0.29 | -0.35 | -0.85 |
| YPR068C     | HOS1        | 344  | 422  | 0.81 | -0.30 | -0.35 | -0.85 |
| YFR016C     |             | 4648 | 5705 | 0.81 | -0.30 | -0.35 | -0.85 |

|             |             |       |       |      |       |       |       |
|-------------|-------------|-------|-------|------|-------|-------|-------|
| YGL071W     | RCS1        | 3094  | 3798  | 0.81 | -0.30 | -0.35 | -0.85 |
| YGR130C     |             | 7776  | 9547  | 0.81 | -0.30 | -0.35 | -0.85 |
| YHR169W     | DBP8        | 888   | 1090  | 0.81 | -0.30 | -0.35 | -0.85 |
| YGL089C     | MF(ALPHA)2  | 1096  | 1346  | 0.81 | -0.30 | -0.35 | -0.85 |
| YPL161C     | BEM4        | 477   | 586   | 0.81 | -0.30 | -0.35 | -0.85 |
| YML010W-B   |             | 1438  | 1767  | 0.81 | -0.30 | -0.35 | -0.85 |
| YGL243W     | TAD1        | 624   | 766   | 0.81 | -0.30 | -0.35 | -0.85 |
| YOL164W     |             | 1587  | 1950  | 0.81 | -0.30 | -0.35 | -0.85 |
| YGL196W     |             | 1066  | 1309  | 0.81 | -0.30 | -0.35 | -0.85 |
| YKRWdelta10 | YKRWdelta10 | 603   | 741   | 0.81 | -0.30 | -0.35 | -0.85 |
| YML066C     |             | 2313  | 2842  | 0.81 | -0.30 | -0.35 | -0.85 |
| YGR247W     |             | 620   | 762   | 0.81 | -0.30 | -0.35 | -0.85 |
| YOR216C     | RUD3        | 2575  | 3168  | 0.81 | -0.30 | -0.35 | -0.86 |
| YML103C     | NUP188      | 576   | 709   | 0.81 | -0.30 | -0.35 | -0.86 |
| YBR051W     |             | 346   | 426   | 0.81 | -0.30 | -0.35 | -0.86 |
| YMR151W     | YIM2        | 1769  | 2177  | 0.81 | -0.30 | -0.36 | -0.86 |
| YMR105C     | PGM2        | 1802  | 2218  | 0.81 | -0.30 | -0.36 | -0.86 |
| YCR063W     |             | 1388  | 1709  | 0.81 | -0.30 | -0.36 | -0.86 |
| YDR149C     |             | 1740  | 2143  | 0.81 | -0.30 | -0.36 | -0.86 |
| YKL182W     | FAS1        | 1200  | 1478  | 0.81 | -0.30 | -0.36 | -0.86 |
| YJL057C     | IKS1        | 2370  | 2920  | 0.81 | -0.30 | -0.36 | -0.86 |
| YDR486C     |             | 4423  | 5452  | 0.81 | -0.30 | -0.36 | -0.86 |
| YLR155C     | ASP3-1      | 2783  | 3430  | 0.81 | -0.30 | -0.36 | -0.86 |
| YLR173W     |             | 659   | 812   | 0.81 | -0.30 | -0.36 | -0.86 |
| YMR031W-A   |             | 2232  | 2752  | 0.81 | -0.30 | -0.36 | -0.87 |
| YNL010W     |             | 1468  | 1811  | 0.81 | -0.30 | -0.36 | -0.87 |
| YLR114C     |             | 2215  | 2734  | 0.81 | -0.30 | -0.36 | -0.87 |
| YNL339C     | YRF1-6      | 1556  | 1921  | 0.81 | -0.30 | -0.36 | -0.87 |
| YEL005C     | VAB31       | 2901  | 3582  | 0.81 | -0.30 | -0.36 | -0.87 |
| YCR033W     |             | 5521  | 6820  | 0.81 | -0.30 | -0.36 | -0.87 |
| YPL060W     |             | 579   | 715   | 0.81 | -0.30 | -0.36 | -0.87 |
| YDR495C     | VPS3        | 11096 | 13712 | 0.81 | -0.31 | -0.36 | -0.87 |
| YKR032W     |             | 829   | 1025  | 0.81 | -0.31 | -0.36 | -0.87 |
| YNL006W     | LST8        | 3992  | 4934  | 0.81 | -0.31 | -0.36 | -0.87 |
| YBR194W     |             | 1078  | 1332  | 0.81 | -0.31 | -0.36 | -0.87 |
| YNL105W     |             | 946   | 1169  | 0.81 | -0.31 | -0.36 | -0.87 |

|             |             |      |      |      |       |       |       |
|-------------|-------------|------|------|------|-------|-------|-------|
| YGR011W     |             | 1064 | 1317 | 0.81 | -0.31 | -0.36 | -0.88 |
| YPL012W     |             | 1793 | 2219 | 0.81 | -0.31 | -0.36 | -0.88 |
| YML032C-A   |             | 898  | 1112 | 0.81 | -0.31 | -0.36 | -0.88 |
| YPL098C     |             | 2812 | 3480 | 0.81 | -0.31 | -0.36 | -0.88 |
| YFR049W     | YMR31       | 1425 | 1764 | 0.81 | -0.31 | -0.36 | -0.88 |
| YDRWdelta23 | YDRWdelta23 | 3803 | 4708 | 0.81 | -0.31 | -0.36 | -0.88 |
| YOL132W     |             | 2223 | 2752 | 0.81 | -0.31 | -0.36 | -0.88 |
| YLL025W     |             | 1505 | 1864 | 0.81 | -0.31 | -0.36 | -0.88 |
| YJL053W     | PEP8        | 2899 | 3592 | 0.81 | -0.31 | -0.37 | -0.88 |
| YDR516C     |             | 2545 | 3154 | 0.81 | -0.31 | -0.37 | -0.88 |
| YOR178C     | GAC1        | 1115 | 1382 | 0.81 | -0.31 | -0.37 | -0.88 |
| YLR466W     | YRF1-4      | 5566 | 6898 | 0.81 | -0.31 | -0.37 | -0.88 |
| YGR016W     |             | 1070 | 1327 | 0.81 | -0.31 | -0.37 | -0.88 |
| YPL153C     | RAD53       | 4266 | 5289 | 0.81 | -0.31 | -0.37 | -0.88 |
| YNL087W     |             | 1836 | 2276 | 0.81 | -0.31 | -0.37 | -0.88 |
| YDR186C     |             | 3421 | 4242 | 0.81 | -0.31 | -0.37 | -0.89 |
| YDL048C     | STP4        | 6526 | 8097 | 0.81 | -0.31 | -0.37 | -0.89 |
| YJR029W     |             | 2236 | 2775 | 0.81 | -0.31 | -0.37 | -0.89 |
| YOR386W     | PHR1        | 838  | 1040 | 0.81 | -0.31 | -0.37 | -0.89 |
| YLL015W     | BPT1        | 7540 | 9359 | 0.81 | -0.31 | -0.37 | -0.89 |
| YML001W     | YPT7        | 2207 | 2740 | 0.81 | -0.31 | -0.37 | -0.89 |
| YBR136W     | ESR1        | 2313 | 2871 | 0.81 | -0.31 | -0.37 | -0.89 |
| YIL162W     | SUC2        | 1517 | 1884 | 0.81 | -0.31 | -0.37 | -0.89 |
| YER152C     |             | 4863 | 6039 | 0.81 | -0.31 | -0.37 | -0.89 |
| YDR314C     |             | 1302 | 1617 | 0.80 | -0.31 | -0.37 | -0.89 |
| YBR097W     | VPS15       | 814  | 1011 | 0.80 | -0.31 | -0.37 | -0.89 |
| YBR177C     | EHT1        | 5283 | 6564 | 0.80 | -0.31 | -0.37 | -0.89 |
| YOR020C     | HSP10       | 2410 | 2994 | 0.80 | -0.31 | -0.37 | -0.89 |
| YPR146C     |             | 523  | 650  | 0.80 | -0.31 | -0.37 | -0.89 |
| YLR336C     | SGD1        | 518  | 644  | 0.80 | -0.31 | -0.37 | -0.89 |
| YDL015C     |             | 4359 | 5418 | 0.80 | -0.31 | -0.37 | -0.89 |
| YJL171C     |             | 602  | 748  | 0.80 | -0.31 | -0.37 | -0.89 |
| YJL043W     |             | 1265 | 1573 | 0.80 | -0.31 | -0.37 | -0.89 |
| YHR021C     | RPS27B      | 634  | 789  | 0.80 | -0.31 | -0.37 | -0.89 |
| YOR356W     |             | 3945 | 4907 | 0.80 | -0.31 | -0.37 | -0.90 |
| YJL005W     | CYR1        | 3114 | 3874 | 0.80 | -0.31 | -0.37 | -0.90 |

|            |            |      |      |      |       |       |       |
|------------|------------|------|------|------|-------|-------|-------|
| YDR086C    | SSS1       | 2624 | 3265 | 0.80 | -0.32 | -0.37 | -0.90 |
| YDR164C    | SEC1       | 1049 | 1305 | 0.80 | -0.32 | -0.37 | -0.90 |
| YHR101C    | BIG1       | 1533 | 1908 | 0.80 | -0.32 | -0.37 | -0.90 |
| YDR532C    |            | 1210 | 1506 | 0.80 | -0.32 | -0.37 | -0.90 |
| YML013C-A  |            | 906  | 1128 | 0.80 | -0.32 | -0.37 | -0.90 |
| YDR106W    | ARP10      | 429  | 534  | 0.80 | -0.32 | -0.37 | -0.90 |
| YAL041W    | CDC24      | 2366 | 2948 | 0.80 | -0.32 | -0.37 | -0.90 |
| YIL073C    | SPO22      | 1102 | 1373 | 0.80 | -0.32 | -0.37 | -0.90 |
| YKLWdelta1 | YKLWdelta1 | 1458 | 1817 | 0.80 | -0.32 | -0.37 | -0.90 |
| YHR082C    | KSP1       | 1725 | 2151 | 0.80 | -0.32 | -0.37 | -0.90 |
| YIL005W    |            | 2523 | 3146 | 0.80 | -0.32 | -0.37 | -0.90 |
| YLR001C    |            | 1796 | 2240 | 0.80 | -0.32 | -0.38 | -0.91 |
| YLR372W    | SUR4       | 839  | 1047 | 0.80 | -0.32 | -0.38 | -0.91 |
| YOL143C    | RIB4       | 2642 | 3297 | 0.80 | -0.32 | -0.38 | -0.91 |
| YDL157C    |            | 2664 | 3326 | 0.80 | -0.32 | -0.38 | -0.91 |
| YJL068C    |            | 1241 | 1550 | 0.80 | -0.32 | -0.38 | -0.91 |
| YDR265W    | PEX10      | 4754 | 5937 | 0.80 | -0.32 | -0.38 | -0.91 |
| YNL295W    |            | 1207 | 1508 | 0.80 | -0.32 | -0.38 | -0.91 |
| YFL025C    | BST1       | 1587 | 1983 | 0.80 | -0.32 | -0.38 | -0.91 |
| YJL009W    |            | 1715 | 2142 | 0.80 | -0.32 | -0.38 | -0.91 |
| YPL222W    |            | 711  | 888  | 0.80 | -0.32 | -0.38 | -0.91 |
| YDR534C    |            | 2815 | 3518 | 0.80 | -0.32 | -0.38 | -0.91 |
| YKL143W    | LTV1       | 2537 | 3172 | 0.80 | -0.32 | -0.38 | -0.91 |
| YHR049W    |            | 1866 | 2334 | 0.80 | -0.32 | -0.38 | -0.92 |
| YNL107W    |            | 3289 | 4114 | 0.80 | -0.32 | -0.38 | -0.92 |
| YML099C    | ARG81      | 1126 | 1409 | 0.80 | -0.32 | -0.38 | -0.92 |
| YOL123W    | HRP1       | 2895 | 3623 | 0.80 | -0.32 | -0.38 | -0.92 |
| YML091C    | RPM2       | 2686 | 3362 | 0.80 | -0.32 | -0.38 | -0.92 |
| YOL008W    |            | 645  | 808  | 0.80 | -0.32 | -0.38 | -0.92 |
| YDL080C    | THI3       | 3743 | 4686 | 0.80 | -0.32 | -0.38 | -0.92 |
| YNL205C    |            | 593  | 743  | 0.80 | -0.32 | -0.38 | -0.92 |
| YGR019W    | UGA1       | 2172 | 2721 | 0.80 | -0.32 | -0.38 | -0.92 |
| YOR012W    |            | 323  | 405  | 0.80 | -0.33 | -0.38 | -0.92 |
| YNL284C    | MRPL10     | 464  | 581  | 0.80 | -0.33 | -0.38 | -0.92 |
| YKR090W    |            | 440  | 551  | 0.80 | -0.33 | -0.38 | -0.92 |
| YKL095W    | YJU2       | 743  | 932  | 0.80 | -0.33 | -0.38 | -0.92 |

|           |        |      |      |      |       |       |       |
|-----------|--------|------|------|------|-------|-------|-------|
| YDR331W   | GPI8   | 2763 | 3464 | 0.80 | -0.33 | -0.38 | -0.92 |
| YKL160W   |        | 3206 | 4020 | 0.80 | -0.33 | -0.38 | -0.92 |
| YCRX20C   |        | 4541 | 5694 | 0.80 | -0.33 | -0.38 | -0.92 |
| YKLO14C   |        | 2150 | 2697 | 0.80 | -0.33 | -0.38 | -0.92 |
| YER104W   | RTT105 | 1804 | 2263 | 0.80 | -0.33 | -0.38 | -0.93 |
| YDL125C   | HNT1   | 1815 | 2277 | 0.80 | -0.33 | -0.38 | -0.93 |
| YDR455C   |        | 2533 | 3178 | 0.80 | -0.33 | -0.38 | -0.93 |
| YER183C   |        | 4802 | 6025 | 0.80 | -0.33 | -0.38 | -0.93 |
| YAR008W   | SEN34  | 1448 | 1817 | 0.80 | -0.33 | -0.38 | -0.93 |
| YDR489W   |        | 2703 | 3391 | 0.80 | -0.33 | -0.38 | -0.93 |
| YGR182C   |        | 627  | 787  | 0.80 | -0.33 | -0.38 | -0.93 |
| YKLO44W   |        | 1369 | 1719 | 0.80 | -0.33 | -0.38 | -0.93 |
| YOL014W   |        | 3383 | 4248 | 0.80 | -0.33 | -0.38 | -0.93 |
| YDR239C   |        | 1032 | 1296 | 0.80 | -0.33 | -0.39 | -0.93 |
| YML027W   | YOX1   | 2003 | 2517 | 0.80 | -0.33 | -0.39 | -0.93 |
| YKLO64W   | MNR2   | 3881 | 4878 | 0.80 | -0.33 | -0.39 | -0.93 |
| YJL023C   | PET130 | 1018 | 1280 | 0.80 | -0.33 | -0.39 | -0.93 |
| YBL077W   |        | 2655 | 3338 | 0.80 | -0.33 | -0.39 | -0.93 |
| YOR183W   |        | 1417 | 1781 | 0.80 | -0.33 | -0.39 | -0.93 |
| YPR172W   |        | 657  | 827  | 0.80 | -0.33 | -0.39 | -0.93 |
| YLL033W   |        | 338  | 425  | 0.79 | -0.33 | -0.39 | -0.94 |
| YBR162W-A | YSY6   | 2058 | 2590 | 0.79 | -0.33 | -0.39 | -0.94 |
| YDR498C   | SEC20  | 1924 | 2422 | 0.79 | -0.33 | -0.39 | -0.94 |
| YDR306C   |        | 823  | 1037 | 0.79 | -0.33 | -0.39 | -0.94 |
| YDL194W   | SNF3   | 3258 | 4104 | 0.79 | -0.33 | -0.39 | -0.94 |
| YDR182W   | CDC1   | 2506 | 3157 | 0.79 | -0.33 | -0.39 | -0.94 |
| YLR421C   |        | 2119 | 2669 | 0.79 | -0.33 | -0.39 | -0.94 |
| YLL053C   |        | 2588 | 3260 | 0.79 | -0.33 | -0.39 | -0.94 |
| YEL068C   |        | 1652 | 2081 | 0.79 | -0.33 | -0.39 | -0.94 |
| YGL064C   |        | 3383 | 4263 | 0.79 | -0.33 | -0.39 | -0.94 |
| YDR119W   |        | 3507 | 4419 | 0.79 | -0.33 | -0.39 | -0.94 |
| YFL011W   | HXT10  | 861  | 1085 | 0.79 | -0.33 | -0.39 | -0.94 |
| YJL086C   |        | 1712 | 2158 | 0.79 | -0.33 | -0.39 | -0.94 |
| YNL123W   |        | 647  | 815  | 0.79 | -0.33 | -0.39 | -0.94 |
| YPR168W   | NUT2   | 854  | 1076 | 0.79 | -0.33 | -0.39 | -0.94 |
| YBR152W   | SPP381 | 2296 | 2895 | 0.79 | -0.33 | -0.39 | -0.94 |



|             |             |      |       |      |       |       |       |
|-------------|-------------|------|-------|------|-------|-------|-------|
| YLR362W     | STE11       | 1260 | 1590  | 0.79 | -0.34 | -0.39 | -0.94 |
| YOR370C     | MRS6        | 1986 | 2505  | 0.79 | -0.34 | -0.39 | -0.94 |
| YIL007C     |             | 1432 | 1807  | 0.79 | -0.34 | -0.39 | -0.94 |
| YKRO74W     |             | 441  | 556   | 0.79 | -0.34 | -0.39 | -0.94 |
| YGL169W     | SUA5        | 2466 | 3113  | 0.79 | -0.34 | -0.39 | -0.95 |
| YGL004C     |             | 1595 | 2013  | 0.79 | -0.34 | -0.39 | -0.95 |
| YML039W     |             | 8965 | 11321 | 0.79 | -0.34 | -0.39 | -0.95 |
| YILCdelta5  | YILCdelta5  | 1455 | 1838  | 0.79 | -0.34 | -0.39 | -0.95 |
| YNL253W     |             | 1389 | 1754  | 0.79 | -0.34 | -0.39 | -0.95 |
| YLR239C     |             | 1452 | 1834  | 0.79 | -0.34 | -0.39 | -0.95 |
| YFLO27C     |             | 2264 | 2862  | 0.79 | -0.34 | -0.39 | -0.95 |
| YFLO54C     |             | 1337 | 1690  | 0.79 | -0.34 | -0.39 | -0.95 |
| YHR143W-A   | RPC10       | 312  | 395   | 0.79 | -0.34 | -0.39 | -0.95 |
| YNL201C     |             | 2371 | 2998  | 0.79 | -0.34 | -0.39 | -0.95 |
| YJRO50W     | ISY1        | 1662 | 2105  | 0.79 | -0.34 | -0.40 | -0.96 |
| YLL057C     |             | 1053 | 1334  | 0.79 | -0.34 | -0.40 | -0.96 |
| YKRO65C     |             | 651  | 825   | 0.79 | -0.34 | -0.40 | -0.96 |
| YBR087W     | RFC5        | 1788 | 2265  | 0.79 | -0.34 | -0.40 | -0.96 |
| YORCdelta15 | YORCdelta15 | 631  | 799   | 0.79 | -0.34 | -0.40 | -0.96 |
| YLR034C     | SMF3        | 2734 | 3464  | 0.79 | -0.34 | -0.40 | -0.96 |
| YGR194C     | XKS1        | 2737 | 3468  | 0.79 | -0.34 | -0.40 | -0.96 |
| YKL030W     |             | 1964 | 2491  | 0.79 | -0.34 | -0.40 | -0.96 |
| YBL055C     |             | 777  | 986   | 0.79 | -0.34 | -0.40 | -0.96 |
| YDR066C     |             | 355  | 450   | 0.79 | -0.34 | -0.40 | -0.96 |
| YLR400W     |             | 436  | 553   | 0.79 | -0.34 | -0.40 | -0.96 |
| YEL067C     |             | 3017 | 3828  | 0.79 | -0.34 | -0.40 | -0.96 |
| YJL120W     |             | 4985 | 6325  | 0.79 | -0.34 | -0.40 | -0.96 |
| YJL211C     |             | 1007 | 1279  | 0.79 | -0.34 | -0.40 | -0.97 |
| YAR042W     | SWH1        | 1913 | 2429  | 0.79 | -0.34 | -0.40 | -0.97 |
| YCR020C-A   | MAK31       | 1487 | 1888  | 0.79 | -0.34 | -0.40 | -0.97 |
| YML120C     | NDI1        | 2630 | 3341  | 0.79 | -0.35 | -0.40 | -0.97 |
| YLR356W     |             | 1579 | 2006  | 0.79 | -0.35 | -0.40 | -0.97 |
| YDL035C     | GPR1        | 3525 | 4480  | 0.79 | -0.35 | -0.40 | -0.97 |
| YML069W     | POB3        | 1931 | 2455  | 0.79 | -0.35 | -0.40 | -0.97 |
| YFLO40W     |             | 1340 | 1704  | 0.79 | -0.35 | -0.40 | -0.97 |
| YLR097C     |             | 1056 | 1343  | 0.79 | -0.35 | -0.40 | -0.97 |

|           |        |       |       |      |       |       |       |
|-----------|--------|-------|-------|------|-------|-------|-------|
| YOR191W   | RIS1   | 1867  | 2375  | 0.79 | -0.35 | -0.40 | -0.97 |
| YGR003W   |        | 2859  | 3638  | 0.79 | -0.35 | -0.40 | -0.98 |
| YFL058W   | THI5   | 868   | 1105  | 0.79 | -0.35 | -0.40 | -0.98 |
| YER138C   |        | 5276  | 6715  | 0.79 | -0.35 | -0.40 | -0.98 |
| YPL164C   |        | 1468  | 1868  | 0.79 | -0.35 | -0.40 | -0.98 |
| YLR434C   |        | 903   | 1150  | 0.79 | -0.35 | -0.40 | -0.98 |
| YHR131C   |        | 769   | 979   | 0.79 | -0.35 | -0.40 | -0.98 |
| YLR132C   |        | 1206  | 1536  | 0.79 | -0.35 | -0.41 | -0.98 |
| YLR067C   | PET309 | 3659  | 4663  | 0.78 | -0.35 | -0.41 | -0.98 |
| YDR270W   | CCC2   | 2590  | 3301  | 0.78 | -0.35 | -0.41 | -0.98 |
| YLR381W   |        | 1552  | 1979  | 0.78 | -0.35 | -0.41 | -0.98 |
| YER044C-A | MEI4   | 788   | 1005  | 0.78 | -0.35 | -0.41 | -0.98 |
| YMR211W   |        | 1437  | 1834  | 0.78 | -0.35 | -0.41 | -0.98 |
| YFL-TYB   |        | 10121 | 12917 | 0.78 | -0.35 | -0.41 | -0.99 |
| YBR153W   | RIB7   | 2804  | 3579  | 0.78 | -0.35 | -0.41 | -0.99 |
| YBR150C   | TBS1   | 5044  | 6438  | 0.78 | -0.35 | -0.41 | -0.99 |
| YDLO01W   |        | 4698  | 5999  | 0.78 | -0.35 | -0.41 | -0.99 |
| YLL032C   |        | 1377  | 1758  | 0.78 | -0.35 | -0.41 | -0.99 |
| YML030W   |        | 1150  | 1469  | 0.78 | -0.35 | -0.41 | -0.99 |
| YKL189W   | HYM1   | 1137  | 1452  | 0.78 | -0.35 | -0.41 | -0.99 |
| YMR030W   |        | 2221  | 2836  | 0.78 | -0.35 | -0.41 | -0.99 |
| YDL109C   |        | 1884  | 2407  | 0.78 | -0.35 | -0.41 | -0.99 |
| YGR022C   |        | 540   | 690   | 0.78 | -0.35 | -0.41 | -0.99 |
| YPL058C   | PDR12  | 1102  | 1408  | 0.78 | -0.35 | -0.41 | -0.99 |
| YNR046W   |        | 1126  | 1439  | 0.78 | -0.35 | -0.41 | -0.99 |
| YER168C   | CCA1   | 3797  | 4854  | 0.78 | -0.35 | -0.41 | -0.99 |
| YLR283W   |        | 510   | 652   | 0.78 | -0.36 | -0.41 | -0.99 |
| YBR085W   | AAC3   | 871   | 1114  | 0.78 | -0.36 | -0.41 | -0.99 |
| YNL162W   | RPL42A | 449   | 575   | 0.78 | -0.36 | -0.41 | -1.00 |
| YHR185C   | ADY1   | 1791  | 2293  | 0.78 | -0.36 | -0.41 | -1.00 |
| YEL035C   | UTR5   | 1859  | 2380  | 0.78 | -0.36 | -0.41 | -1.00 |
| YDR461W   | MFA1   | 1208  | 1549  | 0.78 | -0.36 | -0.41 | -1.00 |
| YIL082W   |        | 4602  | 5900  | 0.78 | -0.36 | -0.41 | -1.00 |
| YPR073C   | LTP1   | 381   | 489   | 0.78 | -0.36 | -0.41 | -1.00 |
| YJR161C   | COS5   | 1359  | 1742  | 0.78 | -0.36 | -0.41 | -1.00 |
| YMR104C   | YPK2   | 2290  | 2939  | 0.78 | -0.36 | -0.42 | -1.01 |

|            |            |       |       |      |       |       |       |
|------------|------------|-------|-------|------|-------|-------|-------|
| YER017C    | AFG3       | 2711  | 3480  | 0.78 | -0.36 | -0.42 | -1.01 |
| YDL089W    |            | 2497  | 3206  | 0.78 | -0.36 | -0.42 | -1.01 |
| YPR119W    | CLB2       | 3941  | 5062  | 0.78 | -0.36 | -0.42 | -1.01 |
| YLR352W    |            | 515   | 661   | 0.78 | -0.36 | -0.42 | -1.01 |
| YAR003W    |            | 1722  | 2212  | 0.78 | -0.36 | -0.42 | -1.01 |
| YDR418W    | RPL12B     | 3268  | 4200  | 0.78 | -0.36 | -0.42 | -1.01 |
| YOR161C    |            | 1539  | 1978  | 0.78 | -0.36 | -0.42 | -1.01 |
| YOR357C    | GRD19      | 768   | 987   | 0.78 | -0.36 | -0.42 | -1.01 |
| YMR156C    |            | 1342  | 1725  | 0.78 | -0.36 | -0.42 | -1.01 |
| YLL005C    |            | 2816  | 3622  | 0.78 | -0.36 | -0.42 | -1.01 |
| YKL033W-A  | YKL033W-A  | 2500  | 3216  | 0.78 | -0.36 | -0.42 | -1.01 |
| YOR279C    |            | 367   | 472   | 0.78 | -0.36 | -0.42 | -1.01 |
| YKL179C    |            | 532   | 684   | 0.78 | -0.36 | -0.42 | -1.01 |
| YDL094C    |            | 1677  | 2158  | 0.78 | -0.36 | -0.42 | -1.01 |
| YDRCTy1-2D | YDRCTy1-2D | 15850 | 20415 | 0.78 | -0.37 | -0.42 | -1.02 |
| YEL069C    | HXT13      | 3481  | 4489  | 0.78 | -0.37 | -0.42 | -1.02 |
| YDR525W    |            | 679   | 876   | 0.78 | -0.37 | -0.42 | -1.02 |
| YLR438C-A  | YLR438C-A  | 2165  | 2792  | 0.78 | -0.37 | -0.42 | -1.02 |
| YMR158C-B  | YMR158C-B  | 4703  | 6065  | 0.78 | -0.37 | -0.42 | -1.02 |
| YLL018C-A  | YLL018C-A  | 630   | 812   | 0.78 | -0.37 | -0.42 | -1.02 |
| YOR203W    |            | 392   | 506   | 0.78 | -0.37 | -0.42 | -1.02 |
| YFR002W    | NIC96      | 3166  | 4084  | 0.78 | -0.37 | -0.42 | -1.02 |
| YDL149W    | AUT9       | 1263  | 1629  | 0.78 | -0.37 | -0.42 | -1.02 |
| YLR086W    | SMC4       | 3116  | 4021  | 0.77 | -0.37 | -0.42 | -1.02 |
| YNL136W    |            | 3016  | 3894  | 0.77 | -0.37 | -0.42 | -1.03 |
| YGL255W    | ZRT1       | 314   | 405   | 0.77 | -0.37 | -0.43 | -1.03 |
| YBR215W    | HPC2       | 2393  | 3090  | 0.77 | -0.37 | -0.43 | -1.03 |
| YGL260W    |            | 1903  | 2459  | 0.77 | -0.37 | -0.43 | -1.03 |
| YPL165C    |            | 373   | 482   | 0.77 | -0.37 | -0.43 | -1.03 |
| YHR128W    | FUR1       | 1845  | 2385  | 0.77 | -0.37 | -0.43 | -1.03 |
| YAL062W    | GDH3       | 964   | 1246  | 0.77 | -0.37 | -0.43 | -1.03 |
| YJR103W    | URA8       | 2416  | 3123  | 0.77 | -0.37 | -0.43 | -1.03 |
| YMR316W    |            | 2993  | 3871  | 0.77 | -0.37 | -0.43 | -1.03 |
| YDR470C    |            | 3445  | 4456  | 0.77 | -0.37 | -0.43 | -1.03 |
| YJL019W    |            | 2117  | 2738  | 0.77 | -0.37 | -0.43 | -1.03 |
| YER015W    | FAA2       | 1535  | 1987  | 0.77 | -0.37 | -0.43 | -1.03 |

|            |            |       |       |      |       |       |       |
|------------|------------|-------|-------|------|-------|-------|-------|
| YKL034W    |            | 3504  | 4535  | 0.77 | -0.37 | -0.43 | -1.03 |
| YPR012W    |            | 1287  | 1666  | 0.77 | -0.37 | -0.43 | -1.03 |
| YPR087W    |            | 924   | 1196  | 0.77 | -0.37 | -0.43 | -1.03 |
| YBR072W    | HSP26      | 2459  | 3184  | 0.77 | -0.37 | -0.43 | -1.04 |
| YJR086W    | STE18      | 684   | 886   | 0.77 | -0.37 | -0.43 | -1.04 |
| YIL015W    | BAR1       | 328   | 425   | 0.77 | -0.37 | -0.43 | -1.04 |
| YGL106W    | MLC1       | 2446  | 3168  | 0.77 | -0.37 | -0.43 | -1.04 |
| YNR062C    |            | 539   | 698   | 0.77 | -0.37 | -0.43 | -1.04 |
| YFR057W    |            | 3280  | 4250  | 0.77 | -0.37 | -0.43 | -1.04 |
| YCR093W    | CDC39      | 9215  | 11940 | 0.77 | -0.37 | -0.43 | -1.04 |
| YGL083W    | SCY1       | 3000  | 3888  | 0.77 | -0.37 | -0.43 | -1.04 |
| YDR473C    | PRP3       | 3068  | 3976  | 0.77 | -0.37 | -0.43 | -1.04 |
| YCLX02C    |            | 3520  | 4562  | 0.77 | -0.37 | -0.43 | -1.04 |
| YKL166C    | TPK3       | 1327  | 1720  | 0.77 | -0.37 | -0.43 | -1.04 |
| YNL056W    |            | 332   | 430   | 0.77 | -0.37 | -0.43 | -1.04 |
| YFL052W    |            | 925   | 1199  | 0.77 | -0.37 | -0.43 | -1.04 |
| YIL174W    |            | 1175  | 1523  | 0.77 | -0.37 | -0.43 | -1.04 |
| YCR032W    | BPH1       | 4485  | 5817  | 0.77 | -0.38 | -0.43 | -1.04 |
| YOL091W    | SPO21      | 575   | 746   | 0.77 | -0.38 | -0.43 | -1.04 |
| YDR464W    | SPP41      | 1046  | 1357  | 0.77 | -0.38 | -0.43 | -1.04 |
| YAR053W    |            | 1055  | 1368  | 0.77 | -0.38 | -0.43 | -1.04 |
| YBL026W    | LSM2       | 1491  | 1934  | 0.77 | -0.38 | -0.43 | -1.04 |
| YHR001W-A  | QCR10      | 2710  | 3517  | 0.77 | -0.38 | -0.43 | -1.04 |
| YLR240W    | VPS34      | 2910  | 3777  | 0.77 | -0.38 | -0.43 | -1.04 |
| YBR053C    |            | 802   | 1041  | 0.77 | -0.38 | -0.43 | -1.05 |
| YOR199W    |            | 1544  | 2005  | 0.77 | -0.38 | -0.43 | -1.05 |
| YDRCTy1-2A | YDRCTy1-2A | 10355 | 13455 | 0.77 | -0.38 | -0.43 | -1.05 |
| YOL137W    |            | 857   | 1114  | 0.77 | -0.38 | -0.43 | -1.05 |
| YLR447C    | VMA6       | 1511  | 1964  | 0.77 | -0.38 | -0.43 | -1.05 |
| YDL240W    | LRG1       | 1411  | 1834  | 0.77 | -0.38 | -0.43 | -1.05 |
| YNR022C    |            | 1573  | 2045  | 0.77 | -0.38 | -0.43 | -1.05 |
| YOL072W    |            | 1814  | 2359  | 0.77 | -0.38 | -0.44 | -1.05 |
| YJR038C    |            | 1154  | 1501  | 0.77 | -0.38 | -0.44 | -1.05 |
| YBR190W    |            | 1009  | 1312  | 0.77 | -0.38 | -0.44 | -1.05 |
| YGL102C    |            | 7196  | 9361  | 0.77 | -0.38 | -0.44 | -1.05 |
| YJL070C    |            | 2799  | 3644  | 0.77 | -0.38 | -0.44 | -1.05 |

|             |             |      |      |      |       |       |       |
|-------------|-------------|------|------|------|-------|-------|-------|
| YBR166C     | TYR1        | 2934 | 3821 | 0.77 | -0.38 | -0.44 | -1.06 |
| YJR034W     | PET191      | 1445 | 1882 | 0.77 | -0.38 | -0.44 | -1.06 |
| YOL115W     | TRF4        | 1591 | 2073 | 0.77 | -0.38 | -0.44 | -1.06 |
| YML011C     |             | 3502 | 4563 | 0.77 | -0.38 | -0.44 | -1.06 |
| YPLWdelta9  | YPLWdelta9  | 528  | 688  | 0.77 | -0.38 | -0.44 | -1.06 |
| YDR115W     |             | 5023 | 6549 | 0.77 | -0.38 | -0.44 | -1.06 |
| YCRO48W     | ARE1        | 4016 | 5238 | 0.77 | -0.38 | -0.44 | -1.06 |
| YGRWdelta26 | YGRWdelta26 | 1353 | 1764 | 0.77 | -0.38 | -0.44 | -1.06 |
| YPR177C     |             | 1551 | 2023 | 0.77 | -0.38 | -0.44 | -1.06 |
| YGR081C     |             | 1245 | 1624 | 0.77 | -0.38 | -0.44 | -1.06 |
| YDL171C     | GLT1        | 6949 | 9067 | 0.77 | -0.38 | -0.44 | -1.06 |
| YPL141C     |             | 3099 | 4044 | 0.77 | -0.38 | -0.44 | -1.06 |
| YDR144C     | MKC7        | 1889 | 2466 | 0.77 | -0.38 | -0.44 | -1.06 |
| YDR504C     |             | 1311 | 1712 | 0.77 | -0.38 | -0.44 | -1.06 |
| YGL138C     |             | 1782 | 2327 | 0.77 | -0.38 | -0.44 | -1.06 |
| YER140W     |             | 1474 | 1924 | 0.77 | -0.38 | -0.44 | -1.06 |
| YCRO98C     | GIT1        | 2107 | 2751 | 0.77 | -0.38 | -0.44 | -1.06 |
| YKR015C     |             | 2970 | 3879 | 0.77 | -0.39 | -0.44 | -1.07 |
| YHR208W     | BAT1        | 645  | 843  | 0.77 | -0.39 | -0.44 | -1.07 |
| YBR262C     |             | 1357 | 1773 | 0.77 | -0.39 | -0.44 | -1.07 |
| YBL106C     | SRO77       | 2337 | 3053 | 0.77 | -0.39 | -0.44 | -1.07 |
| YOL122C     | SMF1        | 2367 | 3093 | 0.77 | -0.39 | -0.44 | -1.07 |
| YILO69C     | RPS24B      | 2505 | 3274 | 0.77 | -0.39 | -0.44 | -1.07 |
| YLL004W     | ORC3        | 969  | 1267 | 0.76 | -0.39 | -0.44 | -1.07 |
| YPRO49C     |             | 1178 | 1541 | 0.76 | -0.39 | -0.44 | -1.07 |
| YBLWdelta8  | YBLWdelta8  | 823  | 1077 | 0.76 | -0.39 | -0.44 | -1.07 |
| YHR090C     | NBN1        | 1982 | 2593 | 0.76 | -0.39 | -0.44 | -1.07 |
| YLR276C     | DBP9        | 2741 | 3587 | 0.76 | -0.39 | -0.44 | -1.07 |
| YBR193C     | MED8        | 3025 | 3958 | 0.76 | -0.39 | -0.44 | -1.07 |
| YER172C     | BRR2        | 4636 | 6069 | 0.76 | -0.39 | -0.44 | -1.07 |
| YAL058W     | CNE1        | 1527 | 1999 | 0.76 | -0.39 | -0.44 | -1.07 |
| YOR193W     |             | 1497 | 1960 | 0.76 | -0.39 | -0.45 | -1.08 |
| YJL018W     |             | 1844 | 2416 | 0.76 | -0.39 | -0.45 | -1.08 |
| YML072C     |             | 5847 | 7661 | 0.76 | -0.39 | -0.45 | -1.08 |
| YOR180C     | DCI1        | 3221 | 4220 | 0.76 | -0.39 | -0.45 | -1.08 |
| YGR018C     |             | 2330 | 3053 | 0.76 | -0.39 | -0.45 | -1.08 |

|             |             |       |       |      |       |       |       |
|-------------|-------------|-------|-------|------|-------|-------|-------|
| YPL121C     | MEI5        | 2474  | 3243  | 0.76 | -0.39 | -0.45 | -1.08 |
| YAR015W     | ADE1        | 4756  | 6239  | 0.76 | -0.39 | -0.45 | -1.08 |
| YKL037W     |             | 1992  | 2613  | 0.76 | -0.39 | -0.45 | -1.08 |
| YOL024W     |             | 1751  | 2298  | 0.76 | -0.39 | -0.45 | -1.08 |
| YGR196C     |             | 3559  | 4673  | 0.76 | -0.39 | -0.45 | -1.08 |
| YNR055C     | HOL1        | 2887  | 3791  | 0.76 | -0.39 | -0.45 | -1.09 |
| YAL031C     | FUN21       | 1684  | 2212  | 0.76 | -0.39 | -0.45 | -1.09 |
| YGRCTy1-2A  | YGRCTy1-2A  | 11244 | 14768 | 0.76 | -0.39 | -0.45 | -1.09 |
| YDR453C     |             | 3356  | 4410  | 0.76 | -0.39 | -0.45 | -1.09 |
| YOR137C     |             | 731   | 961   | 0.76 | -0.39 | -0.45 | -1.09 |
| YBR197C     |             | 1602  | 2105  | 0.76 | -0.39 | -0.45 | -1.09 |
| YBR098W     | MMS4        | 1442  | 1895  | 0.76 | -0.39 | -0.45 | -1.09 |
| YJL037W     |             | 775   | 1019  | 0.76 | -0.39 | -0.45 | -1.09 |
| YML055W     | SPC2        | 1411  | 1856  | 0.76 | -0.40 | -0.45 | -1.09 |
| YDR183W     |             | 3539  | 4657  | 0.76 | -0.40 | -0.45 | -1.09 |
| YDR131C     |             | 1067  | 1404  | 0.76 | -0.40 | -0.45 | -1.09 |
| YML026C     | RPS18B      | 4369  | 5750  | 0.76 | -0.40 | -0.45 | -1.09 |
| YJL176C     | SWI3        | 2241  | 2950  | 0.76 | -0.40 | -0.45 | -1.09 |
| YMR162C     |             | 820   | 1079  | 0.76 | -0.40 | -0.45 | -1.09 |
| YMR166C     |             | 1106  | 1456  | 0.76 | -0.40 | -0.45 | -1.10 |
| YOR086C     |             | 700   | 922   | 0.76 | -0.40 | -0.45 | -1.10 |
| YKL111C     |             | 2285  | 3011  | 0.76 | -0.40 | -0.45 | -1.10 |
| YLR418C     | CDC73       | 1612  | 2124  | 0.76 | -0.40 | -0.45 | -1.10 |
| YML076C     |             | 3002  | 3956  | 0.76 | -0.40 | -0.45 | -1.10 |
| YLL046C     | RNP1        | 3611  | 4760  | 0.76 | -0.40 | -0.45 | -1.10 |
| YDR521W     |             | 2756  | 3634  | 0.76 | -0.40 | -0.46 | -1.10 |
| YDR435C     |             | 1325  | 1747  | 0.76 | -0.40 | -0.46 | -1.10 |
| YPR141C     | KAR3        | 854   | 1126  | 0.76 | -0.40 | -0.46 | -1.10 |
| YLR462W     |             | 3136  | 4137  | 0.76 | -0.40 | -0.46 | -1.10 |
| YIL027C     |             | 5442  | 7179  | 0.76 | -0.40 | -0.46 | -1.10 |
| YHR211W     | FLO5        | 1451  | 1914  | 0.76 | -0.40 | -0.46 | -1.10 |
| YDRWdelta12 | YDRWdelta12 | 12403 | 16366 | 0.76 | -0.40 | -0.46 | -1.10 |
| YOR100C     | CRC1        | 374   | 494   | 0.76 | -0.40 | -0.46 | -1.10 |
| YGR067C     |             | 2052  | 2711  | 0.76 | -0.40 | -0.46 | -1.11 |
| YPR116W     |             | 524   | 693   | 0.76 | -0.40 | -0.46 | -1.11 |
| YCRO95C     |             | 1532  | 2025  | 0.76 | -0.40 | -0.46 | -1.11 |

|             |             |       |       |      |       |       |       |
|-------------|-------------|-------|-------|------|-------|-------|-------|
| YPR044C     |             | 989   | 1308  | 0.76 | -0.40 | -0.46 | -1.11 |
| YOR257W     | CDC31       | 346   | 458   | 0.76 | -0.40 | -0.46 | -1.11 |
| YIL116W     | HIS5        | 1142  | 1511  | 0.76 | -0.40 | -0.46 | -1.11 |
| YKL176C     |             | 3233  | 4279  | 0.76 | -0.40 | -0.46 | -1.11 |
| YHR174W     | ENO2        | 753   | 998   | 0.75 | -0.41 | -0.46 | -1.12 |
| YMR123W     | PKR1        | 1468  | 1945  | 0.75 | -0.41 | -0.46 | -1.12 |
| YDL049C     | KNH1        | 1011  | 1340  | 0.75 | -0.41 | -0.46 | -1.12 |
| YDR008C     |             | 1309  | 1735  | 0.75 | -0.41 | -0.46 | -1.12 |
| YER078C     |             | 2690  | 3567  | 0.75 | -0.41 | -0.46 | -1.12 |
| YLR318W     | EST2        | 559   | 742   | 0.75 | -0.41 | -0.46 | -1.12 |
| YELO23C     |             | 1877  | 2492  | 0.75 | -0.41 | -0.47 | -1.12 |
| YLRWdelta12 | YLRWdelta12 | 1121  | 1489  | 0.75 | -0.41 | -0.47 | -1.12 |
| YMR216C     | SKY1        | 3036  | 4032  | 0.75 | -0.41 | -0.47 | -1.12 |
| YKL026C     |             | 2149  | 2855  | 0.75 | -0.41 | -0.47 | -1.12 |
| YDR170C     | SEC7        | 4271  | 5676  | 0.75 | -0.41 | -0.47 | -1.13 |
| YGR045C     |             | 1997  | 2654  | 0.75 | -0.41 | -0.47 | -1.13 |
| YMR051C     |             | 8926  | 11865 | 0.75 | -0.41 | -0.47 | -1.13 |
| YNL103W     | MET4        | 1963  | 2609  | 0.75 | -0.41 | -0.47 | -1.13 |
| YER138W-A   | YER138W-A   | 580   | 771   | 0.75 | -0.41 | -0.47 | -1.13 |
| YER124C     |             | 2844  | 3783  | 0.75 | -0.41 | -0.47 | -1.13 |
| YKL080W     | VMA5        | 2991  | 3978  | 0.75 | -0.41 | -0.47 | -1.13 |
| YLR018C     |             | 2879  | 3830  | 0.75 | -0.41 | -0.47 | -1.13 |
| YMR172C-A   |             | 1583  | 2106  | 0.75 | -0.41 | -0.47 | -1.13 |
| YJL225C     |             | 1736  | 2312  | 0.75 | -0.41 | -0.47 | -1.13 |
| YOL003C     |             | 1091  | 1453  | 0.75 | -0.41 | -0.47 | -1.13 |
| YGR239C     | PEX21       | 1452  | 1934  | 0.75 | -0.41 | -0.47 | -1.13 |
| YKL090W     |             | 2413  | 3215  | 0.75 | -0.41 | -0.47 | -1.13 |
| YFR014C     | CMK1        | 1526  | 2033  | 0.75 | -0.41 | -0.47 | -1.14 |
| YGRCTy1-2C  | YGRCTy1-2C  | 14979 | 19968 | 0.75 | -0.41 | -0.47 | -1.14 |
| YJR055W     | HIT1        | 386   | 515   | 0.75 | -0.42 | -0.47 | -1.14 |
| YDR438W     |             | 1550  | 2067  | 0.75 | -0.42 | -0.47 | -1.14 |
| YGL164C     |             | 2448  | 3266  | 0.75 | -0.42 | -0.47 | -1.14 |
| YNL199C     | GCR2        | 3941  | 5258  | 0.75 | -0.42 | -0.47 | -1.14 |
| YAR037W     |             | 2833  | 3781  | 0.75 | -0.42 | -0.47 | -1.14 |
| YAR009C     |             | 5224  | 6973  | 0.75 | -0.42 | -0.47 | -1.14 |
| YOR010C     | TIR2        | 619   | 826   | 0.75 | -0.42 | -0.47 | -1.14 |

|             |             |      |       |      |       |       |       |
|-------------|-------------|------|-------|------|-------|-------|-------|
| YMRWdelta21 | YMRWdelta21 | 430  | 574   | 0.75 | -0.42 | -0.47 | -1.14 |
| YDR340W     |             | 981  | 1310  | 0.75 | -0.42 | -0.47 | -1.14 |
| YLR419W     |             | 2573 | 3437  | 0.75 | -0.42 | -0.47 | -1.14 |
| YGL020C     |             | 731  | 977   | 0.75 | -0.42 | -0.47 | -1.14 |
| YAR014C     |             | 1872 | 2502  | 0.75 | -0.42 | -0.47 | -1.15 |
| YLR089C     |             | 1314 | 1756  | 0.75 | -0.42 | -0.47 | -1.15 |
| YBR090C     |             | 1165 | 1557  | 0.75 | -0.42 | -0.47 | -1.15 |
| YCL029C     | BIK1        | 8925 | 11933 | 0.75 | -0.42 | -0.48 | -1.15 |
| YPL216W     |             | 1453 | 1943  | 0.75 | -0.42 | -0.48 | -1.15 |
| YCRO01W     |             | 3989 | 5339  | 0.75 | -0.42 | -0.48 | -1.15 |
| YPR082C     | DIB1        | 1331 | 1782  | 0.75 | -0.42 | -0.48 | -1.15 |
| YGL079W     |             | 490  | 657   | 0.75 | -0.42 | -0.48 | -1.15 |
| YPR059C     |             | 433  | 581   | 0.75 | -0.42 | -0.48 | -1.16 |
| YHR127W     | HSN1        | 967  | 1297  | 0.75 | -0.42 | -0.48 | -1.16 |
| YBR183W     | YPC1        | 1247 | 1672  | 0.75 | -0.42 | -0.48 | -1.16 |
| YMR194C-A   | YMR194C-A   | 2412 | 3234  | 0.75 | -0.42 | -0.48 | -1.16 |
| YDR151C     | CTH1        | 1285 | 1723  | 0.75 | -0.42 | -0.48 | -1.16 |
| YHR193C     | EGD2        | 2022 | 2712  | 0.75 | -0.42 | -0.48 | -1.16 |
| YNL252C     | MRPL17      | 371  | 497   | 0.75 | -0.42 | -0.48 | -1.16 |
| YNR040W     |             | 5334 | 7155  | 0.75 | -0.42 | -0.48 | -1.16 |
| YKL147C     |             | 1744 | 2339  | 0.75 | -0.42 | -0.48 | -1.16 |
| YMR128W     | ECM16       | 3107 | 4169  | 0.75 | -0.42 | -0.48 | -1.16 |
| YBR274W     | CHK1        | 694  | 931   | 0.75 | -0.42 | -0.48 | -1.16 |
| YJL064W     |             | 304  | 408   | 0.74 | -0.42 | -0.48 | -1.16 |
| YJL003W     |             | 1343 | 1803  | 0.74 | -0.43 | -0.48 | -1.16 |
| YDR252W     | BTT1        | 1790 | 2403  | 0.74 | -0.43 | -0.48 | -1.16 |
| YGL247W     |             | 2337 | 3138  | 0.74 | -0.43 | -0.48 | -1.16 |
| YMR118C     |             | 561  | 753   | 0.74 | -0.43 | -0.48 | -1.16 |
| YCRO19W     | MAK32       | 4272 | 5741  | 0.74 | -0.43 | -0.48 | -1.17 |
| YLR245C     | CDD1        | 430  | 578   | 0.74 | -0.43 | -0.48 | -1.17 |
| YNL022C     |             | 6478 | 8712  | 0.74 | -0.43 | -0.48 | -1.17 |
| YML092C     | PRE8        | 1894 | 2547  | 0.74 | -0.43 | -0.48 | -1.17 |
| YMR179W     | SPT21       | 2255 | 3033  | 0.74 | -0.43 | -0.48 | -1.17 |
| YOR353C     |             | 2142 | 2882  | 0.74 | -0.43 | -0.48 | -1.17 |
| YOR018W     | ROD1        | 1001 | 1348  | 0.74 | -0.43 | -0.48 | -1.17 |
| YOLCdelta8  | YOLCdelta8  | 498  | 670   | 0.74 | -0.43 | -0.49 | -1.17 |



|            |            |      |      |      |       |       |       |
|------------|------------|------|------|------|-------|-------|-------|
| YPR156C    |            | 929  | 1251 | 0.74 | -0.43 | -0.49 | -1.17 |
| YML101C    |            | 2041 | 2750 | 0.74 | -0.43 | -0.49 | -1.17 |
| YMR259C    |            | 473  | 638  | 0.74 | -0.43 | -0.49 | -1.17 |
| YFR018C    |            | 951  | 1281 | 0.74 | -0.43 | -0.49 | -1.18 |
| YBR214W    | SDS24      | 1030 | 1389 | 0.74 | -0.43 | -0.49 | -1.18 |
| YCRX07W    |            | 896  | 1208 | 0.74 | -0.43 | -0.49 | -1.18 |
| YHR032W    |            | 442  | 596  | 0.74 | -0.43 | -0.49 | -1.18 |
| YBR295W    | PCA1       | 2033 | 2744 | 0.74 | -0.43 | -0.49 | -1.18 |
| YLR099C    | ICT1       | 2351 | 3175 | 0.74 | -0.43 | -0.49 | -1.18 |
| YKRO18C    |            | 992  | 1339 | 0.74 | -0.43 | -0.49 | -1.18 |
| YILO36W    |            | 2412 | 3257 | 0.74 | -0.43 | -0.49 | -1.18 |
| YNL222W    | SSU72      | 2118 | 2860 | 0.74 | -0.43 | -0.49 | -1.18 |
| YGL057C    |            | 1707 | 2307 | 0.74 | -0.43 | -0.49 | -1.18 |
| YMR291W    |            | 2640 | 3567 | 0.74 | -0.43 | -0.49 | -1.18 |
| YDR543C    |            | 2259 | 3055 | 0.74 | -0.44 | -0.49 | -1.19 |
| YNR011C    | PRP2       | 2755 | 3725 | 0.74 | -0.44 | -0.49 | -1.19 |
| YOL023W    | IFM1       | 2361 | 3193 | 0.74 | -0.44 | -0.49 | -1.19 |
| YBR099C    |            | 3010 | 4072 | 0.74 | -0.44 | -0.49 | -1.19 |
| YGR275W    | RTT102     | 5162 | 6983 | 0.74 | -0.44 | -0.49 | -1.19 |
| YGR212W    |            | 1994 | 2698 | 0.74 | -0.44 | -0.49 | -1.19 |
| YGR039W    |            | 879  | 1190 | 0.74 | -0.44 | -0.49 | -1.19 |
| YKRO03W    |            | 1739 | 2355 | 0.74 | -0.44 | -0.49 | -1.19 |
| YBR182C    | SMP1       | 1144 | 1550 | 0.74 | -0.44 | -0.49 | -1.19 |
| YBLWdelta3 | YBLWdelta3 | 1516 | 2054 | 0.74 | -0.44 | -0.49 | -1.19 |
| YJR102C    |            | 1550 | 2100 | 0.74 | -0.44 | -0.49 | -1.19 |
| YHR079C    | IRE1       | 2549 | 3454 | 0.74 | -0.44 | -0.49 | -1.19 |
| YDL224C    | WHI4       | 2169 | 2939 | 0.74 | -0.44 | -0.49 | -1.19 |
| YLR430W    | SEN1       | 2459 | 3335 | 0.74 | -0.44 | -0.50 | -1.20 |
| YKLO65C    | YET1       | 1314 | 1782 | 0.74 | -0.44 | -0.50 | -1.20 |
| YLR111W    |            | 2792 | 3788 | 0.74 | -0.44 | -0.50 | -1.20 |
| YDL129W    |            | 511  | 694  | 0.74 | -0.44 | -0.50 | -1.20 |
| YDR406W    | PDR15      | 5919 | 8039 | 0.74 | -0.44 | -0.50 | -1.20 |
| YOR072W    |            | 1517 | 2061 | 0.74 | -0.44 | -0.50 | -1.20 |
| YPL074W    | YTA6       | 518  | 704  | 0.74 | -0.44 | -0.50 | -1.20 |
| YFR021W    |            | 1771 | 2407 | 0.74 | -0.44 | -0.50 | -1.20 |
| YDR407C    | TRS120     | 3998 | 5434 | 0.74 | -0.44 | -0.50 | -1.20 |

|           |           |      |      |      |       |       |       |
|-----------|-----------|------|------|------|-------|-------|-------|
| YKL162C-A | YKL162C-A | 2034 | 2765 | 0.74 | -0.44 | -0.50 | -1.20 |
| YPL252C   | YAH1      | 760  | 1034 | 0.74 | -0.44 | -0.50 | -1.21 |
| YPL038W   | MET31     | 597  | 812  | 0.74 | -0.44 | -0.50 | -1.21 |
| YCRO97WB  |           | 2999 | 4080 | 0.74 | -0.44 | -0.50 | -1.21 |
| YCL053C   |           | 1957 | 2662 | 0.74 | -0.44 | -0.50 | -1.21 |
| YBL104C   |           | 437  | 595  | 0.73 | -0.44 | -0.50 | -1.21 |
| YDR138W   | HPR1      | 2779 | 3783 | 0.73 | -0.45 | -0.50 | -1.21 |
| YNL029C   | KTR5      | 1305 | 1777 | 0.73 | -0.45 | -0.50 | -1.21 |
| YDR244W   | PEX5      | 2741 | 3733 | 0.73 | -0.45 | -0.50 | -1.21 |
| YNR066C   |           | 515  | 701  | 0.73 | -0.45 | -0.50 | -1.21 |
| YMR165C   | SMP2      | 3875 | 5281 | 0.73 | -0.45 | -0.50 | -1.21 |
| YGL163C   | RAD54     | 925  | 1261 | 0.73 | -0.45 | -0.50 | -1.21 |
| YER066C-A |           | 450  | 614  | 0.73 | -0.45 | -0.50 | -1.21 |
| YKL131W   |           | 1554 | 2118 | 0.73 | -0.45 | -0.50 | -1.22 |
| YPR192W   | AQY1      | 653  | 890  | 0.73 | -0.45 | -0.50 | -1.22 |
| YILO33C   | SRA1      | 3663 | 4995 | 0.73 | -0.45 | -0.50 | -1.22 |
| YBR102C   | EXO84     | 2257 | 3079 | 0.73 | -0.45 | -0.50 | -1.22 |
| YLR145W   |           | 682  | 930  | 0.73 | -0.45 | -0.50 | -1.22 |
| YLR064W   |           | 1673 | 2283 | 0.73 | -0.45 | -0.50 | -1.22 |
| YDR319C   |           | 1066 | 1454 | 0.73 | -0.45 | -0.50 | -1.22 |
| YER076C   |           | 2233 | 3048 | 0.73 | -0.45 | -0.51 | -1.22 |
| YML096W   |           | 4222 | 5770 | 0.73 | -0.45 | -0.51 | -1.22 |
| YGL199C   |           | 1224 | 1673 | 0.73 | -0.45 | -0.51 | -1.22 |
| YKL018W   |           | 1228 | 1678 | 0.73 | -0.45 | -0.51 | -1.22 |
| YJL131C   |           | 808  | 1104 | 0.73 | -0.45 | -0.51 | -1.22 |
| YBR178W   |           | 913  | 1248 | 0.73 | -0.45 | -0.51 | -1.22 |
| YNL206C   |           | 1107 | 1513 | 0.73 | -0.45 | -0.51 | -1.22 |
| YHR067W   |           | 3410 | 4663 | 0.73 | -0.45 | -0.51 | -1.23 |
| YGL052W   |           | 592  | 810  | 0.73 | -0.45 | -0.51 | -1.23 |
| YBR297W   | MAL33     | 974  | 1332 | 0.73 | -0.45 | -0.51 | -1.23 |
| YOR094W   | ARF3      | 487  | 666  | 0.73 | -0.45 | -0.51 | -1.23 |
| YNL238W   | KEX2      | 2396 | 3280 | 0.73 | -0.45 | -0.51 | -1.23 |
| YBR213W   | MET8      | 2368 | 3242 | 0.73 | -0.45 | -0.51 | -1.23 |
| YML070W   | DAK1      | 1514 | 2072 | 0.73 | -0.45 | -0.51 | -1.23 |
| YIRO15W   | RPR2      | 1942 | 2659 | 0.73 | -0.45 | -0.51 | -1.23 |
| YNR016C   | ACC1      | 5854 | 8026 | 0.73 | -0.46 | -0.51 | -1.23 |

|             |             |       |       |      |       |       |       |
|-------------|-------------|-------|-------|------|-------|-------|-------|
| YJL035C     | TAD2        | 1236  | 1695  | 0.73 | -0.46 | -0.51 | -1.24 |
| YDR246W     | TRS23       | 1047  | 1437  | 0.73 | -0.46 | -0.51 | -1.24 |
| YML108W     |             | 896   | 1230  | 0.73 | -0.46 | -0.51 | -1.24 |
| YLR431C     |             | 1018  | 1398  | 0.73 | -0.46 | -0.51 | -1.24 |
| YKL003C     | MRP17       | 1171  | 1608  | 0.73 | -0.46 | -0.51 | -1.24 |
| YGRO44C     | RME1        | 1992  | 2737  | 0.73 | -0.46 | -0.51 | -1.24 |
| YBR012W-A   |             | 7653  | 10516 | 0.73 | -0.46 | -0.51 | -1.24 |
| YBR278W     | DPB3        | 1587  | 2182  | 0.73 | -0.46 | -0.52 | -1.24 |
| YIL037C     |             | 6753  | 9284  | 0.73 | -0.46 | -0.52 | -1.24 |
| YNL167C     | SKO1        | 2630  | 3616  | 0.73 | -0.46 | -0.52 | -1.24 |
| YNL260C     |             | 452   | 621   | 0.73 | -0.46 | -0.52 | -1.24 |
| YMR050C     |             | 12748 | 17531 | 0.73 | -0.46 | -0.52 | -1.25 |
| YCR083W     | TRX3        | 1129  | 1553  | 0.73 | -0.46 | -0.52 | -1.25 |
| YNR039C     |             | 3245  | 4466  | 0.73 | -0.46 | -0.52 | -1.25 |
| YIRO39C     | YPS6        | 305   | 420   | 0.73 | -0.46 | -0.52 | -1.25 |
| YMR065W     | KAR5        | 1144  | 1575  | 0.73 | -0.46 | -0.52 | -1.25 |
| YHLO09C     | YAP3        | 2704  | 3723  | 0.73 | -0.46 | -0.52 | -1.25 |
| YMR213W     | CEF1        | 1593  | 2195  | 0.73 | -0.46 | -0.52 | -1.25 |
| YER004W     |             | 2753  | 3793  | 0.73 | -0.46 | -0.52 | -1.25 |
| YGR052W     |             | 676   | 931   | 0.73 | -0.46 | -0.52 | -1.25 |
| YDR371W     |             | 3057  | 4213  | 0.73 | -0.46 | -0.52 | -1.25 |
| YJL136C     | RPS21B      | 2104  | 2900  | 0.73 | -0.46 | -0.52 | -1.25 |
| YCL022C     |             | 3755  | 5175  | 0.73 | -0.46 | -0.52 | -1.25 |
| YIRO17C     | MET28       | 633   | 873   | 0.73 | -0.46 | -0.52 | -1.25 |
| YBR260C     | RGD1        | 7502  | 10345 | 0.73 | -0.46 | -0.52 | -1.25 |
| YDL161W     | ENT1        | 7638  | 10535 | 0.73 | -0.46 | -0.52 | -1.26 |
| YBL079W     | NUP170      | 6609  | 9117  | 0.72 | -0.46 | -0.52 | -1.26 |
| YDL050C     |             | 3100  | 4277  | 0.72 | -0.46 | -0.52 | -1.26 |
| YMR290C     | HAS1        | 456   | 630   | 0.72 | -0.46 | -0.52 | -1.26 |
| YMR126C     |             | 1747  | 2413  | 0.72 | -0.47 | -0.52 | -1.26 |
| YJR026W     |             | 6227  | 8601  | 0.72 | -0.47 | -0.52 | -1.26 |
| YHR190W     | ERG9        | 516   | 713   | 0.72 | -0.47 | -0.52 | -1.26 |
| YGRCDelta20 | YGRCDelta20 | 1217  | 1683  | 0.72 | -0.47 | -0.52 | -1.27 |
| YKL142W     | MRP8        | 693   | 958   | 0.72 | -0.47 | -0.52 | -1.27 |
| YNL143C     |             | 2408  | 3332  | 0.72 | -0.47 | -0.52 | -1.27 |
| YHR075C     |             | 2671  | 3696  | 0.72 | -0.47 | -0.52 | -1.27 |

|             |             |      |      |      |       |       |       |
|-------------|-------------|------|------|------|-------|-------|-------|
| YLR405W     |             | 2829 | 3914 | 0.72 | -0.47 | -0.52 | -1.27 |
| YDR214W     |             | 2274 | 3147 | 0.72 | -0.47 | -0.52 | -1.27 |
| YHRCdelta12 | YHRCdelta12 | 809  | 1120 | 0.72 | -0.47 | -0.53 | -1.27 |
| YNL011C     |             | 503  | 696  | 0.72 | -0.47 | -0.53 | -1.27 |
| YHR210C     |             | 998  | 1382 | 0.72 | -0.47 | -0.53 | -1.27 |
| YDR229W     |             | 2848 | 3945 | 0.72 | -0.47 | -0.53 | -1.27 |
| YDR241W     |             | 796  | 1102 | 0.72 | -0.47 | -0.53 | -1.27 |
| YLR302C     |             | 2167 | 3003 | 0.72 | -0.47 | -0.53 | -1.27 |
| YMR100W     | MUB1        | 914  | 1267 | 0.72 | -0.47 | -0.53 | -1.27 |
| YJR018W     |             | 828  | 1149 | 0.72 | -0.47 | -0.53 | -1.28 |
| YPL010W     | RET3        | 613  | 850  | 0.72 | -0.47 | -0.53 | -1.28 |
| YER094C     | PUP3        | 1820 | 2525 | 0.72 | -0.47 | -0.53 | -1.28 |
| YIL085C     | KTR7        | 3326 | 4617 | 0.72 | -0.47 | -0.53 | -1.28 |
| YLR450W     | HMG2        | 1598 | 2219 | 0.72 | -0.47 | -0.53 | -1.28 |
| YLR048W     | RPS0B       | 2031 | 2822 | 0.72 | -0.47 | -0.53 | -1.28 |
| YDR501W     | PLM2        | 2657 | 3692 | 0.72 | -0.47 | -0.53 | -1.28 |
| YPRO61C     |             | 865  | 1202 | 0.72 | -0.48 | -0.53 | -1.28 |
| YOL043C     | NTG2        | 1739 | 2418 | 0.72 | -0.48 | -0.53 | -1.28 |
| YDR166C     | SEC5        | 1040 | 1447 | 0.72 | -0.48 | -0.53 | -1.29 |
| YBL078C     | AUT7        | 1853 | 2578 | 0.72 | -0.48 | -0.53 | -1.29 |
| YIL144W     | TID3        | 3343 | 4653 | 0.72 | -0.48 | -0.53 | -1.29 |
| YGL259W     | YPS5        | 2624 | 3652 | 0.72 | -0.48 | -0.53 | -1.29 |
| YMR319C     | FET4        | 1434 | 1996 | 0.72 | -0.48 | -0.53 | -1.29 |
| YOL116W     | MSN1        | 2077 | 2893 | 0.72 | -0.48 | -0.53 | -1.29 |
| YGR038W     | ORM1        | 518  | 722  | 0.72 | -0.48 | -0.53 | -1.29 |
| YMR045C     |             | 5875 | 8185 | 0.72 | -0.48 | -0.53 | -1.29 |
| YML013W     |             | 1863 | 2597 | 0.72 | -0.48 | -0.53 | -1.29 |
| YPL192C     |             | 655  | 913  | 0.72 | -0.48 | -0.54 | -1.29 |
| YDR025W     | RPS11A      | 2314 | 3226 | 0.72 | -0.48 | -0.54 | -1.29 |
| YHR133C     |             | 2198 | 3064 | 0.72 | -0.48 | -0.54 | -1.29 |
| YLR156W     |             | 747  | 1042 | 0.72 | -0.48 | -0.54 | -1.29 |
| YBL018C     | POP8        | 523  | 730  | 0.72 | -0.48 | -0.54 | -1.30 |
| YGR080W     | TWF1        | 1277 | 1783 | 0.72 | -0.48 | -0.54 | -1.30 |
| YPL152W     | RRD2        | 2143 | 2992 | 0.72 | -0.48 | -0.54 | -1.30 |
| YBR289W     | SNF5        | 3748 | 5233 | 0.72 | -0.48 | -0.54 | -1.30 |
| YBR186W     | PCH2        | 2418 | 3379 | 0.72 | -0.48 | -0.54 | -1.30 |

|             |             |      |      |      |       |       |       |
|-------------|-------------|------|------|------|-------|-------|-------|
| YLR308W     | CDA2        | 5668 | 7921 | 0.72 | -0.48 | -0.54 | -1.30 |
| YFL011W-A   |             | 2129 | 2976 | 0.72 | -0.48 | -0.54 | -1.30 |
| YJL161W     |             | 398  | 557  | 0.72 | -0.48 | -0.54 | -1.30 |
| YDR271C     |             | 1646 | 2302 | 0.71 | -0.48 | -0.54 | -1.31 |
| YGL015C     |             | 1405 | 1966 | 0.71 | -0.49 | -0.54 | -1.31 |
| YDR466W     |             | 2452 | 3433 | 0.71 | -0.49 | -0.54 | -1.31 |
| YJL152W     |             | 2958 | 4143 | 0.71 | -0.49 | -0.54 | -1.31 |
| YMR122C     |             | 2031 | 2844 | 0.71 | -0.49 | -0.54 | -1.31 |
| YLR278C     |             | 1087 | 1523 | 0.71 | -0.49 | -0.54 | -1.31 |
| YCL042W     |             | 2067 | 2896 | 0.71 | -0.49 | -0.54 | -1.31 |
| YGR248W     | SOL4        | 647  | 906  | 0.71 | -0.49 | -0.54 | -1.31 |
| YJR125C     | ENT3        | 2767 | 3877 | 0.71 | -0.49 | -0.54 | -1.31 |
| YGL140C     |             | 2994 | 4196 | 0.71 | -0.49 | -0.54 | -1.31 |
| YKL222C     |             | 639  | 896  | 0.71 | -0.49 | -0.54 | -1.31 |
| YAR069C     |             | 3665 | 5138 | 0.71 | -0.49 | -0.54 | -1.31 |
| YGL133W     |             | 2557 | 3586 | 0.71 | -0.49 | -0.54 | -1.31 |
| YML057W     | CMP2        | 4686 | 6571 | 0.71 | -0.49 | -0.54 | -1.31 |
| YDRWdelta31 | YDRWdelta31 | 461  | 647  | 0.71 | -0.49 | -0.54 | -1.31 |
| YKR029C     |             | 1842 | 2584 | 0.71 | -0.49 | -0.54 | -1.32 |
| YJL200C     |             | 1601 | 2246 | 0.71 | -0.49 | -0.54 | -1.32 |
| YNL233W     | BNI4        | 1762 | 2473 | 0.71 | -0.49 | -0.55 | -1.32 |
| YCL023C     |             | 4646 | 6522 | 0.71 | -0.49 | -0.55 | -1.32 |
| YEL033W     |             | 1540 | 2164 | 0.71 | -0.49 | -0.55 | -1.32 |
| YDR537C     |             | 1801 | 2530 | 0.71 | -0.49 | -0.55 | -1.32 |
| YDL216C     |             | 553  | 778  | 0.71 | -0.49 | -0.55 | -1.32 |
| YPR001W     | CIT3        | 810  | 1139 | 0.71 | -0.49 | -0.55 | -1.32 |
| YPR050C     |             | 972  | 1368 | 0.71 | -0.49 | -0.55 | -1.33 |
| YKL164C     | PIR1        | 2092 | 2944 | 0.71 | -0.49 | -0.55 | -1.33 |
| YAL063C     | FLO9        | 1471 | 2073 | 0.71 | -0.49 | -0.55 | -1.33 |
| YOR243C     |             | 1012 | 1427 | 0.71 | -0.50 | -0.55 | -1.33 |
| YML010W-A   |             | 1742 | 2457 | 0.71 | -0.50 | -0.55 | -1.33 |
| YJRWdelta14 | YJRWdelta14 | 315  | 444  | 0.71 | -0.50 | -0.55 | -1.33 |
| YDL093W     | PMT5        | 3559 | 5019 | 0.71 | -0.50 | -0.55 | -1.33 |
| YPR095C     | SYT1        | 2384 | 3363 | 0.71 | -0.50 | -0.55 | -1.33 |
| YOL009C     | MDM12       | 701  | 989  | 0.71 | -0.50 | -0.55 | -1.33 |
| YIL052C     | RPL34B      | 1275 | 1799 | 0.71 | -0.50 | -0.55 | -1.33 |

|             |             |      |       |      |       |       |       |
|-------------|-------------|------|-------|------|-------|-------|-------|
| YIL165C     |             | 1201 | 1695  | 0.71 | -0.50 | -0.55 | -1.34 |
| YNL216W     | RAP1        | 1710 | 2416  | 0.71 | -0.50 | -0.55 | -1.34 |
| YDR321W     | ASP1        | 1925 | 2721  | 0.71 | -0.50 | -0.56 | -1.34 |
| YCL010C     |             | 2538 | 3588  | 0.71 | -0.50 | -0.56 | -1.34 |
| YGR015C     |             | 1298 | 1836  | 0.71 | -0.50 | -0.56 | -1.34 |
| YDR456W     | NHX1        | 2012 | 2848  | 0.71 | -0.50 | -0.56 | -1.35 |
| YOR162C     | YRR1        | 1824 | 2581  | 0.71 | -0.50 | -0.56 | -1.35 |
| YMR133W     | REC114      | 952  | 1348  | 0.71 | -0.50 | -0.56 | -1.35 |
| YLR463C     |             | 2054 | 2909  | 0.71 | -0.50 | -0.56 | -1.35 |
| YLRCdelta16 | YLRCdelta16 | 990  | 1404  | 0.71 | -0.50 | -0.56 | -1.35 |
| YBL093C     | ROX3        | 2244 | 3182  | 0.71 | -0.50 | -0.56 | -1.35 |
| YOR305W     |             | 1109 | 1573  | 0.71 | -0.50 | -0.56 | -1.35 |
| YIL077C     |             | 742  | 1053  | 0.70 | -0.50 | -0.56 | -1.35 |
| YLR157C     | ASP3-2      | 713  | 1012  | 0.70 | -0.50 | -0.56 | -1.35 |
| YGR142W     | BTN2        | 981  | 1392  | 0.70 | -0.51 | -0.56 | -1.36 |
| YDR484W     | SAC2        | 1554 | 2205  | 0.70 | -0.51 | -0.56 | -1.36 |
| YAL010C     | MDM10       | 1989 | 2824  | 0.70 | -0.51 | -0.56 | -1.36 |
| YDR281C     |             | 3102 | 4404  | 0.70 | -0.51 | -0.56 | -1.36 |
| YML081C-A   | YML081C-A   | 2471 | 3510  | 0.70 | -0.51 | -0.56 | -1.36 |
| YDR457W     | TOM1        | 1693 | 2405  | 0.70 | -0.51 | -0.56 | -1.36 |
| YDR313C     | PIB1        | 2529 | 3596  | 0.70 | -0.51 | -0.56 | -1.36 |
| YCRX04W     |             | 2991 | 4255  | 0.70 | -0.51 | -0.56 | -1.36 |
| YIL063C     | YRB2        | 622  | 886   | 0.70 | -0.51 | -0.57 | -1.37 |
| YCL006C     |             | 7584 | 10796 | 0.70 | -0.51 | -0.57 | -1.37 |
| YJLWdelta16 | YJLWdelta16 | 667  | 950   | 0.70 | -0.51 | -0.57 | -1.37 |
| YMR119W-A   |             | 1844 | 2628  | 0.70 | -0.51 | -0.57 | -1.37 |
| YGR225W     | SPO70       | 980  | 1396  | 0.70 | -0.51 | -0.57 | -1.37 |
| YJL067W     |             | 2509 | 3576  | 0.70 | -0.51 | -0.57 | -1.37 |
| YMR062C     | ECM40       | 1244 | 1773  | 0.70 | -0.51 | -0.57 | -1.37 |
| YKL224C     |             | 1430 | 2039  | 0.70 | -0.51 | -0.57 | -1.37 |
| YGR288W     | MAL13       | 881  | 1257  | 0.70 | -0.51 | -0.57 | -1.37 |
| YKL211C     | TRP3        | 921  | 1314  | 0.70 | -0.51 | -0.57 | -1.37 |
| YGR110W     |             | 448  | 639   | 0.70 | -0.51 | -0.57 | -1.37 |
| YGL113W     |             | 1012 | 1446  | 0.70 | -0.51 | -0.57 | -1.38 |
| YGL065C     | ALG2        | 498  | 711   | 0.70 | -0.51 | -0.57 | -1.38 |
| YOR333C     |             | 350  | 500   | 0.70 | -0.51 | -0.57 | -1.38 |

|             |             |       |       |      |       |       |       |
|-------------|-------------|-------|-------|------|-------|-------|-------|
| YMR150C     | IMP1        | 976   | 1395  | 0.70 | -0.52 | -0.57 | -1.38 |
| YJL039C     | NUP192      | 963   | 1376  | 0.70 | -0.52 | -0.57 | -1.38 |
| YCRWdelta11 | YCRWdelta11 | 320   | 457   | 0.70 | -0.52 | -0.57 | -1.38 |
| YIL111W     | COX5B       | 1015  | 1452  | 0.70 | -0.52 | -0.57 | -1.38 |
| YML116W     | ATR1        | 2060  | 2948  | 0.70 | -0.52 | -0.57 | -1.38 |
| YIRO16W     |             | 1738  | 2487  | 0.70 | -0.52 | -0.57 | -1.38 |
| YLL020C     |             | 2351  | 3366  | 0.70 | -0.52 | -0.57 | -1.39 |
| YIRO20W-B   | YIRO20W-B   | 1319  | 1888  | 0.70 | -0.52 | -0.57 | -1.39 |
| YPL168W     |             | 861   | 1233  | 0.70 | -0.52 | -0.57 | -1.39 |
| YMR258C     |             | 639   | 916   | 0.70 | -0.52 | -0.57 | -1.39 |
| YML017W     | PSP2        | 1368  | 1962  | 0.70 | -0.52 | -0.58 | -1.39 |
| YGR114C     |             | 2479  | 3555  | 0.70 | -0.52 | -0.58 | -1.39 |
| YLR112W     |             | 1349  | 1936  | 0.70 | -0.52 | -0.58 | -1.39 |
| YNR010W     | CSE2        | 773   | 1109  | 0.70 | -0.52 | -0.58 | -1.40 |
| YBR012C     |             | 621   | 892   | 0.70 | -0.52 | -0.58 | -1.40 |
| YJL147C     |             | 610   | 877   | 0.70 | -0.52 | -0.58 | -1.40 |
| YNR006W     | VPS27       | 2600  | 3736  | 0.70 | -0.52 | -0.58 | -1.40 |
| YDR277C     | MTH1        | 2795  | 4021  | 0.70 | -0.52 | -0.58 | -1.40 |
| YOL010W     |             | 2739  | 3942  | 0.69 | -0.53 | -0.58 | -1.40 |
| YPL120W     | VPS30       | 1119  | 1611  | 0.69 | -0.53 | -0.58 | -1.41 |
| YBR007C     |             | 869   | 1252  | 0.69 | -0.53 | -0.58 | -1.41 |
| YBR292C     |             | 11589 | 16690 | 0.69 | -0.53 | -0.58 | -1.41 |
| YHRCTy1-1C  | YHRCTy1-1C  | 7788  | 11219 | 0.69 | -0.53 | -0.58 | -1.41 |
| YDR261C     | EXG2        | 3841  | 5534  | 0.69 | -0.53 | -0.58 | -1.41 |
| YDL114W     |             | 3497  | 5041  | 0.69 | -0.53 | -0.58 | -1.41 |
| YHR195W     | VAB36       | 892   | 1287  | 0.69 | -0.53 | -0.58 | -1.41 |
| YJR087W     |             | 2048  | 2953  | 0.69 | -0.53 | -0.58 | -1.41 |
| YBL089W     |             | 1290  | 1860  | 0.69 | -0.53 | -0.58 | -1.41 |
| YGL007W     |             | 886   | 1279  | 0.69 | -0.53 | -0.59 | -1.41 |
| YOL075C     |             | 3169  | 4573  | 0.69 | -0.53 | -0.59 | -1.41 |
| YPL076W     | GPI2        | 662   | 956   | 0.69 | -0.53 | -0.59 | -1.41 |
| YER009W     | NTF2        | 1129  | 1629  | 0.69 | -0.53 | -0.59 | -1.41 |
| YLL014W     |             | 636   | 918   | 0.69 | -0.53 | -0.59 | -1.42 |
| YNR023W     | SNF12       | 2899  | 4187  | 0.69 | -0.53 | -0.59 | -1.42 |
| YGL073W     | HSF1        | 1820  | 2629  | 0.69 | -0.53 | -0.59 | -1.42 |
| YPR017C     | DSS4        | 662   | 957   | 0.69 | -0.53 | -0.59 | -1.42 |

|             |             |      |       |      |       |       |       |
|-------------|-------------|------|-------|------|-------|-------|-------|
| YHR194W     |             | 5075 | 7338  | 0.69 | -0.53 | -0.59 | -1.42 |
| YPL132W     | COX11       | 464  | 671   | 0.69 | -0.53 | -0.59 | -1.42 |
| YLR338W     |             | 1193 | 1726  | 0.69 | -0.53 | -0.59 | -1.42 |
| YLR404W     |             | 1646 | 2383  | 0.69 | -0.53 | -0.59 | -1.43 |
| YJL216C     |             | 978  | 1417  | 0.69 | -0.53 | -0.59 | -1.43 |
| YDL029W     | ARP2        | 1701 | 2464  | 0.69 | -0.53 | -0.59 | -1.43 |
| YLR230W     |             | 4222 | 6121  | 0.69 | -0.54 | -0.59 | -1.43 |
| YJL027C     |             | 500  | 725   | 0.69 | -0.54 | -0.59 | -1.43 |
| YHR112C     |             | 1676 | 2430  | 0.69 | -0.54 | -0.59 | -1.43 |
| YJR101W     |             | 727  | 1055  | 0.69 | -0.54 | -0.59 | -1.44 |
| YHLO42W     |             | 522  | 758   | 0.69 | -0.54 | -0.59 | -1.44 |
| YDR004W     | RAD57       | 332  | 482   | 0.69 | -0.54 | -0.59 | -1.44 |
| YPL236C     |             | 679  | 987   | 0.69 | -0.54 | -0.60 | -1.44 |
| YIL055C     |             | 1814 | 2636  | 0.69 | -0.54 | -0.60 | -1.44 |
| YDR227W     | SIR4        | 1101 | 1600  | 0.69 | -0.54 | -0.60 | -1.44 |
| YMR130W     |             | 759  | 1104  | 0.69 | -0.54 | -0.60 | -1.44 |
| YNL151C     | RPC31       | 2893 | 4207  | 0.69 | -0.54 | -0.60 | -1.44 |
| YBL047C     |             | 1629 | 2371  | 0.69 | -0.54 | -0.60 | -1.44 |
| YGR063C     | SPT4        | 2900 | 4223  | 0.69 | -0.54 | -0.60 | -1.44 |
| YLR084C     | RAX2        | 1682 | 2450  | 0.69 | -0.54 | -0.60 | -1.45 |
| YOL142W     | RRP40       | 930  | 1355  | 0.69 | -0.54 | -0.60 | -1.45 |
| YJR082C     |             | 1573 | 2293  | 0.69 | -0.54 | -0.60 | -1.45 |
| YDR135C     | YCF1        | 9308 | 13574 | 0.69 | -0.54 | -0.60 | -1.45 |
| YOR210W     | RPB10       | 1871 | 2731  | 0.69 | -0.55 | -0.60 | -1.45 |
| YJLWdelta15 | YJLWdelta15 | 4414 | 6453  | 0.68 | -0.55 | -0.60 | -1.46 |
| YDR243C     | PRP28       | 1040 | 1521  | 0.68 | -0.55 | -0.60 | -1.46 |
| YDR228C     | PCF11       | 3507 | 5136  | 0.68 | -0.55 | -0.61 | -1.47 |
| YGL122C     | NAB2        | 2233 | 3271  | 0.68 | -0.55 | -0.61 | -1.47 |
| YPL200W     |             | 1103 | 1616  | 0.68 | -0.55 | -0.61 | -1.47 |
| YDL016C     |             | 1259 | 1845  | 0.68 | -0.55 | -0.61 | -1.47 |
| YGR070W     | ROM1        | 865  | 1267  | 0.68 | -0.55 | -0.61 | -1.47 |
| YGR060W     | ERG25       | 2342 | 3432  | 0.68 | -0.55 | -0.61 | -1.47 |
| YIL060W     |             | 748  | 1097  | 0.68 | -0.55 | -0.61 | -1.47 |
| YPL001W     | HAT1        | 1465 | 2148  | 0.68 | -0.55 | -0.61 | -1.47 |
| YIL001W     |             | 2281 | 3345  | 0.68 | -0.55 | -0.61 | -1.47 |
| YDR374C     |             | 4938 | 7243  | 0.68 | -0.55 | -0.61 | -1.47 |



|            |            |      |       |      |       |       |       |
|------------|------------|------|-------|------|-------|-------|-------|
| YGR223C    |            | 3371 | 4947  | 0.68 | -0.55 | -0.61 | -1.47 |
| YGLCdelta5 | YGLCdelta5 | 402  | 590   | 0.68 | -0.55 | -0.61 | -1.47 |
| YGR184C    | UBR1       | 4297 | 6309  | 0.68 | -0.55 | -0.61 | -1.47 |
| YDR292C    | SRP101     | 1874 | 2754  | 0.68 | -0.56 | -0.61 | -1.48 |
| YBR276C    | PPS1       | 9801 | 14411 | 0.68 | -0.56 | -0.61 | -1.48 |
| YIR001C    | SGN1       | 1206 | 1775  | 0.68 | -0.56 | -0.61 | -1.48 |
| YPL040C    | ISM1       | 3740 | 5507  | 0.68 | -0.56 | -0.61 | -1.48 |
| YNR071C    |            | 4125 | 6077  | 0.68 | -0.56 | -0.61 | -1.49 |
| YER045C    |            | 983  | 1449  | 0.68 | -0.56 | -0.62 | -1.49 |
| YDR196C    |            | 3883 | 5724  | 0.68 | -0.56 | -0.62 | -1.49 |
| YNR027W    |            | 2286 | 3370  | 0.68 | -0.56 | -0.62 | -1.49 |
| YGR093W    |            | 1600 | 2359  | 0.68 | -0.56 | -0.62 | -1.49 |
| YMR138W    | CIN4       | 1671 | 2465  | 0.68 | -0.56 | -0.62 | -1.49 |
| YJL160C    |            | 1470 | 2169  | 0.68 | -0.56 | -0.62 | -1.49 |
| YOR177C    |            | 1052 | 1553  | 0.68 | -0.56 | -0.62 | -1.49 |
| YCL056C    |            | 1764 | 2604  | 0.68 | -0.56 | -0.62 | -1.49 |
| YPL114W    |            | 1850 | 2731  | 0.68 | -0.56 | -0.62 | -1.49 |
| YCL039W    |            | 5036 | 7437  | 0.68 | -0.56 | -0.62 | -1.49 |
| YLL030C    |            | 1791 | 2645  | 0.68 | -0.56 | -0.62 | -1.49 |
| YJR004C    | SAG1       | 2322 | 3433  | 0.68 | -0.56 | -0.62 | -1.50 |
| YDR485C    |            | 3424 | 5062  | 0.68 | -0.56 | -0.62 | -1.50 |
| YHR143W    |            | 1303 | 1926  | 0.68 | -0.56 | -0.62 | -1.50 |
| YLR080W    |            | 1721 | 2549  | 0.68 | -0.57 | -0.62 | -1.50 |
| YBR165W    | UBS1       | 1323 | 1961  | 0.67 | -0.57 | -0.62 | -1.51 |
| YGR174C    | CBP4       | 707  | 1048  | 0.67 | -0.57 | -0.62 | -1.51 |
| YLR432W    |            | 5979 | 8863  | 0.67 | -0.57 | -0.62 | -1.51 |
| YIL017W    |            | 5399 | 8012  | 0.67 | -0.57 | -0.63 | -1.51 |
| YDL065C    | PEX19      | 2498 | 3708  | 0.67 | -0.57 | -0.63 | -1.51 |
| YNL152W    |            | 987  | 1465  | 0.67 | -0.57 | -0.63 | -1.51 |
| YML132W    | COS3       | 4971 | 7379  | 0.67 | -0.57 | -0.63 | -1.51 |
| YDR249C    |            | 647  | 960   | 0.67 | -0.57 | -0.63 | -1.51 |
| YIL079C    |            | 605  | 899   | 0.67 | -0.57 | -0.63 | -1.51 |
| YFR012W    |            | 811  | 1205  | 0.67 | -0.57 | -0.63 | -1.51 |
| YIR013C    | GAT4       | 1774 | 2635  | 0.67 | -0.57 | -0.63 | -1.51 |
| YDR525W-A  | YDR525W-A  | 477  | 709   | 0.67 | -0.57 | -0.63 | -1.52 |
| YBR264C    | YPT10      | 2166 | 3221  | 0.67 | -0.57 | -0.63 | -1.52 |

|            |            |      |      |      |       |       |       |
|------------|------------|------|------|------|-------|-------|-------|
| YPL087W    | YDC1       | 346  | 515  | 0.67 | -0.57 | -0.63 | -1.52 |
| YCR096C    | A2         | 2642 | 3934 | 0.67 | -0.57 | -0.63 | -1.52 |
| YGR162W    | TIF4631    | 2114 | 3148 | 0.67 | -0.57 | -0.63 | -1.52 |
| YMR185W    |            | 1445 | 2151 | 0.67 | -0.57 | -0.63 | -1.52 |
| YGR129W    | SYF2       | 949  | 1414 | 0.67 | -0.57 | -0.63 | -1.52 |
| YJR035W    | RAD26      | 524  | 781  | 0.67 | -0.57 | -0.63 | -1.52 |
| YHRCdelta6 | YHRCdelta6 | 642  | 956  | 0.67 | -0.58 | -0.63 | -1.52 |
| YDR181C    | SAS4       | 1447 | 2157 | 0.67 | -0.58 | -0.63 | -1.53 |
| YLL060C    | GTT2       | 423  | 630  | 0.67 | -0.58 | -0.63 | -1.53 |
| YBR210W    |            | 716  | 1067 | 0.67 | -0.58 | -0.63 | -1.53 |
| YDR361C    |            | 3889 | 5806 | 0.67 | -0.58 | -0.63 | -1.53 |
| YHR098C    | SFB3       | 3871 | 5787 | 0.67 | -0.58 | -0.64 | -1.54 |
| YJR116W    |            | 1003 | 1499 | 0.67 | -0.58 | -0.64 | -1.54 |
| YDR009W    | GAL3       | 621  | 929  | 0.67 | -0.58 | -0.64 | -1.54 |
| YOR352W    |            | 636  | 951  | 0.67 | -0.58 | -0.64 | -1.54 |
| YFR031C    | SMC2       | 5724 | 8578 | 0.67 | -0.58 | -0.64 | -1.55 |
| YNL075W    | IMP4       | 865  | 1296 | 0.67 | -0.58 | -0.64 | -1.55 |
| YER093C    |            | 2750 | 4123 | 0.67 | -0.58 | -0.64 | -1.55 |
| YHR033W    |            | 872  | 1309 | 0.67 | -0.59 | -0.64 | -1.55 |
| YDL062W    |            | 1201 | 1807 | 0.66 | -0.59 | -0.65 | -1.56 |
| YMR287C    | MSU1       | 3033 | 4565 | 0.66 | -0.59 | -0.65 | -1.56 |
| YIL064W    |            | 2310 | 3480 | 0.66 | -0.59 | -0.65 | -1.56 |
| YLR265C    |            | 688  | 1038 | 0.66 | -0.59 | -0.65 | -1.57 |
| YCR067C    | SED4       | 2090 | 3157 | 0.66 | -0.60 | -0.65 | -1.57 |
| YCR003W    | MRPL32     | 1684 | 2550 | 0.66 | -0.60 | -0.65 | -1.58 |
| YIR020C    |            | 1987 | 3011 | 0.66 | -0.60 | -0.66 | -1.58 |
| YHR157W    | REC104     | 668  | 1013 | 0.66 | -0.60 | -0.66 | -1.58 |
| YGL080W    |            | 1839 | 2788 | 0.66 | -0.60 | -0.66 | -1.58 |
| YJL045W    |            | 843  | 1278 | 0.66 | -0.60 | -0.66 | -1.59 |
| YAR033W    |            | 2791 | 4234 | 0.66 | -0.60 | -0.66 | -1.59 |
| YBR137W    |            | 1947 | 2955 | 0.66 | -0.60 | -0.66 | -1.59 |
| YPL144W    | SNR17B     | 878  | 1333 | 0.66 | -0.60 | -0.66 | -1.59 |
| YGR035C    |            | 1006 | 1530 | 0.66 | -0.60 | -0.66 | -1.60 |
| YDL061C    | RPS29B     | 2443 | 3718 | 0.66 | -0.61 | -0.66 | -1.60 |
| YAL011W    |            | 1972 | 3002 | 0.66 | -0.61 | -0.66 | -1.60 |
| YDL139C    |            | 1440 | 2193 | 0.66 | -0.61 | -0.66 | -1.60 |

|             |             |       |       |      |       |       |       |
|-------------|-------------|-------|-------|------|-------|-------|-------|
| YIL100W     |             | 2206  | 3363  | 0.66 | -0.61 | -0.66 | -1.60 |
| YPRWdelta14 | YPRWdelta14 | 880   | 1342  | 0.66 | -0.61 | -0.66 | -1.60 |
| YPL156C     |             | 683   | 1042  | 0.66 | -0.61 | -0.67 | -1.61 |
| YCLO01W     | RER1        | 3508  | 5355  | 0.66 | -0.61 | -0.67 | -1.61 |
| YNR074C     |             | 528   | 806   | 0.65 | -0.61 | -0.67 | -1.61 |
| YJL017W     |             | 880   | 1345  | 0.65 | -0.61 | -0.67 | -1.61 |
| YLL034C     |             | 3688  | 5647  | 0.65 | -0.61 | -0.67 | -1.62 |
| YJR098C     |             | 1880  | 2884  | 0.65 | -0.62 | -0.67 | -1.63 |
| YEL006W     |             | 1119  | 1717  | 0.65 | -0.62 | -0.67 | -1.63 |
| YCRO34W     | FEN1        | 1309  | 2009  | 0.65 | -0.62 | -0.67 | -1.63 |
| YGL070C     | RPB9        | 3880  | 5959  | 0.65 | -0.62 | -0.68 | -1.63 |
| YIL032C     |             | 1222  | 1877  | 0.65 | -0.62 | -0.68 | -1.63 |
| YERWdelta13 | YERWdelta13 | 1038  | 1595  | 0.65 | -0.62 | -0.68 | -1.63 |
| YML105C     | SEC65       | 2280  | 3505  | 0.65 | -0.62 | -0.68 | -1.63 |
| YFR019W     | FAB1        | 2775  | 4268  | 0.65 | -0.62 | -0.68 | -1.64 |
| YML098W     | TAF19       | 637   | 980   | 0.65 | -0.62 | -0.68 | -1.64 |
| YOR071C     |             | 1064  | 1638  | 0.65 | -0.62 | -0.68 | -1.64 |
| YDR533C     |             | 2232  | 3437  | 0.65 | -0.62 | -0.68 | -1.64 |
| YMLCdelta1  | YMLCdelta1  | 2871  | 4424  | 0.65 | -0.62 | -0.68 | -1.64 |
| YER018C     | SPC25       | 515   | 794   | 0.65 | -0.63 | -0.68 | -1.65 |
| YDR169C     | STB3        | 3503  | 5406  | 0.65 | -0.63 | -0.68 | -1.65 |
| YKL097C     |             | 677   | 1045  | 0.65 | -0.63 | -0.68 | -1.65 |
| YBR022W     |             | 602   | 930   | 0.65 | -0.63 | -0.68 | -1.65 |
| YDR500C     | RPL37B      | 1327  | 2052  | 0.65 | -0.63 | -0.68 | -1.65 |
| YML045W     |             | 18016 | 27862 | 0.65 | -0.63 | -0.69 | -1.65 |
| YHR179W     | OYE2        | 1078  | 1667  | 0.65 | -0.63 | -0.69 | -1.66 |
| YPL185W     |             | 4700  | 7274  | 0.65 | -0.63 | -0.69 | -1.66 |
| YER032W     | FIR1        | 1845  | 2860  | 0.65 | -0.63 | -0.69 | -1.66 |
| YCLO21W     |             | 3435  | 5332  | 0.64 | -0.63 | -0.69 | -1.67 |
| YPL221W     | BOP1        | 2057  | 3195  | 0.64 | -0.64 | -0.69 | -1.67 |
| YIL049W     | DFG10       | 3398  | 5279  | 0.64 | -0.64 | -0.69 | -1.67 |
| YOR325W     |             | 661   | 1028  | 0.64 | -0.64 | -0.69 | -1.67 |
| YDR165W     |             | 6371  | 9918  | 0.64 | -0.64 | -0.69 | -1.68 |
| YLRWdelta4  | YLRWdelta4  | 384   | 598   | 0.64 | -0.64 | -0.70 | -1.68 |
| YLRctau1    | YLRctau1    | 889   | 1385  | 0.64 | -0.64 | -0.70 | -1.68 |
| YKL019W     | RAM2        | 2469  | 3850  | 0.64 | -0.64 | -0.70 | -1.68 |

|            |            |       |       |      |       |       |       |
|------------|------------|-------|-------|------|-------|-------|-------|
| YPL102C    |            | 1463  | 2282  | 0.64 | -0.64 | -0.70 | -1.69 |
| YLR013W    | GAT3       | 375   | 586   | 0.64 | -0.64 | -0.70 | -1.69 |
| YGL134W    | PCL10      | 4254  | 6650  | 0.64 | -0.64 | -0.70 | -1.69 |
| YNL217W    |            | 969   | 1515  | 0.64 | -0.65 | -0.70 | -1.69 |
| YLR072W    |            | 2002  | 3131  | 0.64 | -0.65 | -0.70 | -1.69 |
| YDR325W    | YCG1       | 1652  | 2587  | 0.64 | -0.65 | -0.70 | -1.70 |
| YGRCTy1-2D | YGRCTy1-2D | 14715 | 23053 | 0.64 | -0.65 | -0.70 | -1.70 |
| YGL096W    |            | 1621  | 2541  | 0.64 | -0.65 | -0.70 | -1.70 |
| YPR121W    | THI22      | 309   | 484   | 0.64 | -0.65 | -0.70 | -1.70 |
| YGL090W    | LIF1       | 2525  | 3959  | 0.64 | -0.65 | -0.71 | -1.70 |
| YNL269W    |            | 1853  | 2906  | 0.64 | -0.65 | -0.71 | -1.70 |
| YLR127C    | APC2       | 2262  | 3551  | 0.64 | -0.65 | -0.71 | -1.71 |
| YEL003W    | GIM4       | 928   | 1458  | 0.64 | -0.65 | -0.71 | -1.71 |
| YNR014W    |            | 386   | 608   | 0.64 | -0.65 | -0.71 | -1.72 |
| YKL063C    |            | 647   | 1019  | 0.63 | -0.66 | -0.71 | -1.72 |
| YLR032W    | RAD5       | 2337  | 3687  | 0.63 | -0.66 | -0.71 | -1.72 |
| YER106W    |            | 369   | 583   | 0.63 | -0.66 | -0.71 | -1.73 |
| YHR092C    | HXT4       | 808   | 1275  | 0.63 | -0.66 | -0.71 | -1.73 |
| YCR080W    |            | 1759  | 2778  | 0.63 | -0.66 | -0.72 | -1.73 |
| YNR005C    |            | 551   | 870   | 0.63 | -0.66 | -0.72 | -1.73 |
| YPL157W    |            | 1543  | 2438  | 0.63 | -0.66 | -0.72 | -1.73 |
| YOL101C    |            | 994   | 1572  | 0.63 | -0.66 | -0.72 | -1.73 |
| YCR031C    | RPS14A     | 2496  | 3948  | 0.63 | -0.66 | -0.72 | -1.73 |
| YGL131C    |            | 1856  | 2937  | 0.63 | -0.66 | -0.72 | -1.73 |
| YJL011C    |            | 389   | 615   | 0.63 | -0.66 | -0.72 | -1.73 |
| YIL006W    |            | 3317  | 5251  | 0.63 | -0.66 | -0.72 | -1.74 |
| YDR211W    | GCD6       | 1429  | 2263  | 0.63 | -0.66 | -0.72 | -1.74 |
| YDR278C    |            | 1537  | 2436  | 0.63 | -0.66 | -0.72 | -1.74 |
| YGR189C    | CRH1       | 2520  | 3997  | 0.63 | -0.67 | -0.72 | -1.74 |
| YGR051C    |            | 937   | 1487  | 0.63 | -0.67 | -0.72 | -1.74 |
| YDR293C    | SSD1       | 3519  | 5587  | 0.63 | -0.67 | -0.72 | -1.75 |
| YDR341C    |            | 1007  | 1602  | 0.63 | -0.67 | -0.73 | -1.75 |
| YDR245W    | MNN10      | 1564  | 2488  | 0.63 | -0.67 | -0.73 | -1.75 |
| YJLCdelta6 | YJLCdelta6 | 3519  | 5599  | 0.63 | -0.67 | -0.73 | -1.75 |
| YJRWtau3   | YJRWtau3   | 4049  | 6446  | 0.63 | -0.67 | -0.73 | -1.76 |
| YER121W    |            | 427   | 681   | 0.63 | -0.67 | -0.73 | -1.76 |

|         |        |      |      |      |       |       |       |
|---------|--------|------|------|------|-------|-------|-------|
| YIL002C | INP51  | 5026 | 8015 | 0.63 | -0.67 | -0.73 | -1.76 |
| YLR341W |        | 553  | 883  | 0.63 | -0.67 | -0.73 | -1.76 |
| YGL074C |        | 2711 | 4329 | 0.63 | -0.68 | -0.73 | -1.77 |
| YIL016W | SNL1   | 754  | 1205 | 0.63 | -0.68 | -0.73 | -1.77 |
| YPL123C | RNY1   | 644  | 1030 | 0.63 | -0.68 | -0.73 | -1.77 |
| YDR215C |        | 1849 | 2957 | 0.63 | -0.68 | -0.73 | -1.77 |
| YHR086W | NAM8   | 724  | 1161 | 0.62 | -0.68 | -0.74 | -1.78 |
| YNR002C | FUN34  | 770  | 1235 | 0.62 | -0.68 | -0.74 | -1.78 |
| YJR135C | MCM22  | 766  | 1230 | 0.62 | -0.68 | -0.74 | -1.78 |
| YGR050C |        | 855  | 1375 | 0.62 | -0.69 | -0.74 | -1.79 |
| YPR083W |        | 2360 | 3797 | 0.62 | -0.69 | -0.74 | -1.79 |
| YPL201C |        | 1763 | 2843 | 0.62 | -0.69 | -0.75 | -1.80 |
| YJL015C |        | 488  | 787  | 0.62 | -0.69 | -0.75 | -1.80 |
| YOL126C | MDH2   | 1294 | 2089 | 0.62 | -0.69 | -0.75 | -1.80 |
| YER135C |        | 1566 | 2530 | 0.62 | -0.69 | -0.75 | -1.81 |
| YPL205C |        | 2837 | 4585 | 0.62 | -0.69 | -0.75 | -1.81 |
| YLR115W | CFT2   | 2813 | 4549 | 0.62 | -0.69 | -0.75 | -1.81 |
| YHR017W | YSC83  | 2747 | 4444 | 0.62 | -0.69 | -0.75 | -1.81 |
| YGR097W | ASK10  | 1348 | 2181 | 0.62 | -0.69 | -0.75 | -1.81 |
| YPL173W | MRPL40 | 1171 | 1898 | 0.62 | -0.70 | -0.75 | -1.82 |
| YLR010C |        | 305  | 495  | 0.62 | -0.70 | -0.75 | -1.82 |
| YBR148W | YSW1   | 3365 | 5463 | 0.62 | -0.70 | -0.76 | -1.82 |
| YLR096W | KIN2   | 1471 | 2390 | 0.62 | -0.70 | -0.76 | -1.83 |
| YML088W |        | 4461 | 7252 | 0.62 | -0.70 | -0.76 | -1.83 |
| YJL165C | HAL5   | 835  | 1361 | 0.61 | -0.70 | -0.76 | -1.84 |
| YCL002C |        | 931  | 1520 | 0.61 | -0.71 | -0.76 | -1.84 |
| YDR212W | TCP1   | 5185 | 8467 | 0.61 | -0.71 | -0.76 | -1.84 |
| YPR094W |        | 1436 | 2346 | 0.61 | -0.71 | -0.76 | -1.85 |
| YBL094C |        | 667  | 1090 | 0.61 | -0.71 | -0.76 | -1.85 |
| YHR068W | DYS1   | 3723 | 6086 | 0.61 | -0.71 | -0.77 | -1.85 |
| YNL231C | PDR16  | 484  | 792  | 0.61 | -0.71 | -0.77 | -1.85 |
| YGR066C |        | 636  | 1040 | 0.61 | -0.71 | -0.77 | -1.85 |
| YJR114W |        | 1263 | 2068 | 0.61 | -0.71 | -0.77 | -1.85 |
| YOL127W | RPL25  | 1046 | 1715 | 0.61 | -0.71 | -0.77 | -1.86 |
| YGL211W |        | 693  | 1137 | 0.61 | -0.72 | -0.77 | -1.86 |
| YIL146C | ECM37  | 2690 | 4423 | 0.61 | -0.72 | -0.77 | -1.87 |

|           |           |       |       |      |       |       |       |
|-----------|-----------|-------|-------|------|-------|-------|-------|
| YGL154C   | LYS5      | 982   | 1616  | 0.61 | -0.72 | -0.77 | -1.87 |
| YEL007W   |           | 3533  | 5821  | 0.61 | -0.72 | -0.78 | -1.87 |
| YJR028W   |           | 2757  | 4554  | 0.61 | -0.72 | -0.78 | -1.88 |
| YJL135W   |           | 741   | 1226  | 0.60 | -0.73 | -0.78 | -1.89 |
| YIL065C   |           | 5490  | 9083  | 0.60 | -0.73 | -0.78 | -1.89 |
| YKR051W   |           | 317   | 526   | 0.60 | -0.73 | -0.79 | -1.90 |
| YDR170W-A | YDR170W-A | 20078 | 33298 | 0.60 | -0.73 | -0.79 | -1.90 |
| YBL074C   | AAR2      | 1142  | 1896  | 0.60 | -0.73 | -0.79 | -1.90 |
| YDR297W   | SUR2      | 3220  | 5348  | 0.60 | -0.73 | -0.79 | -1.90 |
| YMR003W   |           | 1210  | 2010  | 0.60 | -0.73 | -0.79 | -1.90 |
| YML002W   |           | 1809  | 3008  | 0.60 | -0.73 | -0.79 | -1.91 |
| YOL157C   |           | 448   | 745   | 0.60 | -0.73 | -0.79 | -1.91 |
| YDR283C   | GCN2      | 1501  | 2497  | 0.60 | -0.73 | -0.79 | -1.91 |
| YKL146W   |           | 568   | 946   | 0.60 | -0.74 | -0.79 | -1.91 |
| YMR304C-A |           | 335   | 559   | 0.60 | -0.74 | -0.79 | -1.92 |
| YEL017W   |           | 1126  | 1878  | 0.60 | -0.74 | -0.79 | -1.92 |
| YGL141W   |           | 1474  | 2458  | 0.60 | -0.74 | -0.79 | -1.92 |
| YIL013C   | PDR11     | 765   | 1277  | 0.60 | -0.74 | -0.79 | -1.92 |
| YPL167C   | REV3      | 1078  | 1799  | 0.60 | -0.74 | -0.80 | -1.92 |
| YBR296C   | PHO89     | 1799  | 3004  | 0.60 | -0.74 | -0.80 | -1.92 |
| YBR275C   | RIF1      | 1361  | 2273  | 0.60 | -0.74 | -0.80 | -1.92 |
| YOR278W   | HEM4      | 1342  | 2243  | 0.60 | -0.74 | -0.80 | -1.93 |
| YLR051C   |           | 1161  | 1943  | 0.60 | -0.74 | -0.80 | -1.93 |
| YMR274C   | RCE1      | 662   | 1114  | 0.59 | -0.75 | -0.81 | -1.95 |
| YBR041W   | FAT1      | 2419  | 4070  | 0.59 | -0.75 | -0.81 | -1.95 |
| YMR107W   |           | 1578  | 2655  | 0.59 | -0.75 | -0.81 | -1.95 |
| YGL262W   |           | 2706  | 4555  | 0.59 | -0.75 | -0.81 | -1.95 |
| YNR025C   |           | 414   | 699   | 0.59 | -0.76 | -0.81 | -1.96 |
| YCRO99C   |           | 1987  | 3357  | 0.59 | -0.76 | -0.81 | -1.96 |
| YKL192C   | ACP1      | 1585  | 2678  | 0.59 | -0.76 | -0.81 | -1.96 |
| YMR099C   |           | 632   | 1068  | 0.59 | -0.76 | -0.81 | -1.96 |
| YNR070W   |           | 1211  | 2046  | 0.59 | -0.76 | -0.81 | -1.96 |
| YOR227W   |           | 1865  | 3161  | 0.59 | -0.76 | -0.82 | -1.97 |
| YAR010C   |           | 18436 | 31279 | 0.59 | -0.76 | -0.82 | -1.98 |
| YGL167C   | PMR1      | 2602  | 4417  | 0.59 | -0.76 | -0.82 | -1.98 |
| YMR046C   |           | 9859  | 16740 | 0.59 | -0.76 | -0.82 | -1.98 |

|             |             |      |       |      |       |       |       |
|-------------|-------------|------|-------|------|-------|-------|-------|
| YDR316W     |             | 1592 | 2704  | 0.59 | -0.76 | -0.82 | -1.98 |
| YOL159C     |             | 716  | 1216  | 0.59 | -0.76 | -0.82 | -1.98 |
| YHR059W     |             | 1424 | 2421  | 0.59 | -0.77 | -0.82 | -1.98 |
| YGL180W     | APG1        | 1162 | 1977  | 0.59 | -0.77 | -0.82 | -1.99 |
| YPL062W     |             | 748  | 1274  | 0.59 | -0.77 | -0.82 | -1.99 |
| YHRCdelta8  | YHRCdelta8  | 1972 | 3359  | 0.59 | -0.77 | -0.82 | -1.99 |
| YHRCTy1-1D  | YHRCTy1-1D  | 3620 | 6166  | 0.59 | -0.77 | -0.82 | -1.99 |
| YLR287C     |             | 1183 | 2018  | 0.59 | -0.77 | -0.83 | -2.00 |
| YBR280C     |             | 1392 | 2383  | 0.58 | -0.78 | -0.83 | -2.01 |
| YFLO30W     |             | 466  | 798   | 0.58 | -0.78 | -0.83 | -2.01 |
| YPRCdelta15 | YPRCdelta15 | 379  | 649   | 0.58 | -0.78 | -0.83 | -2.01 |
| YKRO62W     | TFA2        | 1638 | 2807  | 0.58 | -0.78 | -0.83 | -2.01 |
| YKL159C     | RCN1        | 1389 | 2380  | 0.58 | -0.78 | -0.83 | -2.01 |
| YMR184W     |             | 687  | 1179  | 0.58 | -0.78 | -0.84 | -2.02 |
| YAR040C     |             | 1050 | 1804  | 0.58 | -0.78 | -0.84 | -2.02 |
| YPL137C     |             | 5770 | 9915  | 0.58 | -0.78 | -0.84 | -2.02 |
| YJL004C     | SYS1        | 1307 | 2247  | 0.58 | -0.78 | -0.84 | -2.02 |
| YILO84C     | SDS3        | 1160 | 1996  | 0.58 | -0.78 | -0.84 | -2.03 |
| YILO29C     |             | 379  | 653   | 0.58 | -0.78 | -0.84 | -2.03 |
| YDR422C     | SIP1        | 6328 | 10916 | 0.58 | -0.79 | -0.84 | -2.04 |
| YOL047C     |             | 487  | 840   | 0.58 | -0.79 | -0.84 | -2.04 |
| YDL141W     | BPL1        | 1291 | 2229  | 0.58 | -0.79 | -0.84 | -2.04 |
| YILO95W     | PRK1        | 1658 | 2868  | 0.58 | -0.79 | -0.85 | -2.05 |
| YGR043C     |             | 426  | 738   | 0.58 | -0.79 | -0.85 | -2.05 |
| YGR290W     |             | 403  | 700   | 0.58 | -0.80 | -0.85 | -2.06 |
| YMR173W     | DDR48       | 951  | 1656  | 0.57 | -0.80 | -0.86 | -2.07 |
| YKL173W     | SNU114      | 2262 | 3951  | 0.57 | -0.80 | -0.86 | -2.08 |
| YBRWdelta16 | YBRWdelta16 | 394  | 688   | 0.57 | -0.81 | -0.86 | -2.08 |
| YMR155W     |             | 1104 | 1934  | 0.57 | -0.81 | -0.86 | -2.09 |
| YGR243W     |             | 435  | 764   | 0.57 | -0.81 | -0.87 | -2.10 |
| YML060W     | OGG1        | 3249 | 5715  | 0.57 | -0.81 | -0.87 | -2.10 |
| YGR161C     |             | 1287 | 2273  | 0.57 | -0.82 | -0.88 | -2.12 |
| YILO28W     |             | 431  | 762   | 0.57 | -0.82 | -0.88 | -2.12 |
| YDR199W     |             | 1797 | 3178  | 0.57 | -0.82 | -0.88 | -2.12 |
| YERO01W     | MNN1        | 1331 | 2356  | 0.56 | -0.82 | -0.88 | -2.13 |
| YLRWdelta15 | YLRWdelta15 | 378  | 669   | 0.56 | -0.82 | -0.88 | -2.13 |

|             |             |      |      |      |       |       |       |
|-------------|-------------|------|------|------|-------|-------|-------|
| YER080W     |             | 952  | 1688 | 0.56 | -0.83 | -0.88 | -2.13 |
| YDR545W     | YRF1-1      | 704  | 1250 | 0.56 | -0.83 | -0.89 | -2.14 |
| YML050W     |             | 454  | 808  | 0.56 | -0.83 | -0.89 | -2.14 |
| YGL150C     | INO80       | 3981 | 7103 | 0.56 | -0.84 | -0.89 | -2.15 |
| YMR106C     | YKU80       | 1246 | 2230 | 0.56 | -0.84 | -0.90 | -2.16 |
| YBR271W     |             | 649  | 1166 | 0.56 | -0.85 | -0.90 | -2.18 |
| YKR019C     | IRS4        | 966  | 1738 | 0.56 | -0.85 | -0.90 | -2.18 |
| YILCdelta3  | YILCdelta3  | 576  | 1038 | 0.56 | -0.85 | -0.90 | -2.19 |
| YBR268W     | MRPL37      | 372  | 672  | 0.55 | -0.85 | -0.91 | -2.20 |
| YPL054W     | LEE1        | 433  | 784  | 0.55 | -0.85 | -0.91 | -2.20 |
| YKR094C     | RPL40B      | 1156 | 2092 | 0.55 | -0.86 | -0.91 | -2.20 |
| YMR078C     | CTF18       | 1340 | 2431 | 0.55 | -0.86 | -0.92 | -2.21 |
| YNR059W     | MNT4        | 1532 | 2780 | 0.55 | -0.86 | -0.92 | -2.21 |
| YGR205W     |             | 710  | 1292 | 0.55 | -0.86 | -0.92 | -2.22 |
| YBR258C     |             | 499  | 909  | 0.55 | -0.87 | -0.92 | -2.23 |
| YEL070W     |             | 440  | 801  | 0.55 | -0.87 | -0.92 | -2.23 |
| YGL086W     | MAD1        | 4194 | 7669 | 0.55 | -0.87 | -0.93 | -2.24 |
| YPL026C     | SKS1        | 1896 | 3485 | 0.54 | -0.88 | -0.93 | -2.26 |
| YNR075W     | COS10       | 1537 | 2832 | 0.54 | -0.88 | -0.94 | -2.27 |
| YNR044W     | AGA1        | 1959 | 3616 | 0.54 | -0.88 | -0.94 | -2.27 |
| YDR179W-A   |             | 702  | 1297 | 0.54 | -0.89 | -0.94 | -2.27 |
| YOL107W     |             | 304  | 563  | 0.54 | -0.89 | -0.95 | -2.28 |
| YPR200C     | ARR2        | 366  | 679  | 0.54 | -0.89 | -0.95 | -2.29 |
| YEL022W     | GEA2        | 2440 | 4555 | 0.54 | -0.90 | -0.96 | -2.31 |
| YORWdelta22 | YORWdelta22 | 793  | 1482 | 0.54 | -0.90 | -0.96 | -2.31 |
| YHL030W     | ECM29       | 450  | 843  | 0.53 | -0.90 | -0.96 | -2.32 |
| YPL189W     |             | 826  | 1549 | 0.53 | -0.91 | -0.96 | -2.33 |
| YDL210W     | UGA4        | 1827 | 3441 | 0.53 | -0.91 | -0.97 | -2.34 |
| YOR134W     | BAG7        | 442  | 837  | 0.53 | -0.92 | -0.98 | -2.36 |
| YNL232W     | CSL4        | 1876 | 3559 | 0.53 | -0.92 | -0.98 | -2.37 |
| YHR162W     |             | 2703 | 5149 | 0.52 | -0.93 | -0.99 | -2.38 |
| YMR180C     | CTL1        | 769  | 1468 | 0.52 | -0.93 | -0.99 | -2.39 |
| YOR182C     | RPS30B      | 653  | 1247 | 0.52 | -0.93 | -0.99 | -2.39 |
| YPL021W     | ECM23       | 512  | 980  | 0.52 | -0.94 | -0.99 | -2.40 |
| YDR107C     |             | 638  | 1223 | 0.52 | -0.94 | -0.99 | -2.40 |
| YML115C     | VAN1        | 1176 | 2258 | 0.52 | -0.94 | -1.00 | -2.41 |



|            |            |       |       |      |       |       |       |
|------------|------------|-------|-------|------|-------|-------|-------|
| YBL005W-A  |            | 21298 | 40946 | 0.52 | -0.94 | -1.00 | -2.41 |
| YJL041W    | NSP1       | 834   | 1607  | 0.52 | -0.95 | -1.00 | -2.42 |
| YGL118C    |            | 4106  | 7919  | 0.52 | -0.95 | -1.00 | -2.42 |
| YJR023C    |            | 1363  | 2631  | 0.52 | -0.95 | -1.00 | -2.43 |
| YML089C    |            | 684   | 1321  | 0.52 | -0.95 | -1.01 | -2.43 |
| YBR231C    |            | 433   | 840   | 0.52 | -0.95 | -1.01 | -2.44 |
| YFL029C    | CAK1       | 1006  | 1953  | 0.52 | -0.96 | -1.01 | -2.45 |
| YOR226C    | ISU2       | 386   | 752   | 0.51 | -0.96 | -1.02 | -2.46 |
| YMR154C    | RIM13      | 889   | 1752  | 0.51 | -0.98 | -1.04 | -2.50 |
| YGR157W    | CHO2       | 866   | 1738  | 0.50 | -1.01 | -1.06 | -2.56 |
| YEL064C    |            | 1099  | 2208  | 0.50 | -1.01 | -1.06 | -2.56 |
| YGR209C    | TRX2       | 327   | 665   | 0.49 | -1.02 | -1.08 | -2.61 |
| YJLWtau4   | YJLWtau4   | 1821  | 3714  | 0.49 | -1.03 | -1.08 | -2.62 |
| YGRCTy1-2B | YGRCTy1-2B | 5477  | 11200 | 0.49 | -1.03 | -1.09 | -2.63 |
| YBR216C    |            | 2068  | 4241  | 0.49 | -1.04 | -1.09 | -2.64 |
| YLR081W    | GAL2       | 748   | 1538  | 0.49 | -1.04 | -1.10 | -2.65 |
| YGR221C    |            | 1224  | 2522  | 0.49 | -1.04 | -1.10 | -2.65 |
| YDL077C    | VAM6       | 1719  | 3552  | 0.48 | -1.05 | -1.10 | -2.66 |
| YMR125W    | STO1       | 1618  | 3368  | 0.48 | -1.06 | -1.11 | -2.69 |
| YML079W    |            | 656   | 1386  | 0.47 | -1.08 | -1.13 | -2.74 |
| YDR089W    |            | 1076  | 2293  | 0.47 | -1.09 | -1.15 | -2.77 |
| YLR128W    |            | 1181  | 2519  | 0.47 | -1.09 | -1.15 | -2.78 |
| YGR237C    |            | 644   | 1376  | 0.47 | -1.09 | -1.15 | -2.78 |
| YDR452W    |            | 1624  | 3483  | 0.47 | -1.10 | -1.16 | -2.79 |
| YML102C-A  |            | 2418  | 5314  | 0.46 | -1.14 | -1.19 | -2.88 |
| YMR210W    |            | 329   | 740   | 0.45 | -1.17 | -1.22 | -2.96 |
| YGL024W    |            | 1141  | 2563  | 0.45 | -1.17 | -1.22 | -2.96 |
| YMR160W    |            | 1236  | 2822  | 0.44 | -1.19 | -1.25 | -3.01 |
| YGL092W    | NUP145     | 928   | 2125  | 0.44 | -1.20 | -1.25 | -3.02 |
| YDR147W    | EKI1       | 3904  | 8988  | 0.43 | -1.20 | -1.26 | -3.04 |
| YJL103C    |            | 356   | 826   | 0.43 | -1.21 | -1.27 | -3.07 |
| YDR505C    | PSP1       | 1067  | 2476  | 0.43 | -1.21 | -1.27 | -3.07 |
| YDR324C    |            | 1390  | 3230  | 0.43 | -1.22 | -1.27 | -3.07 |
| YGL183C    |            | 432   | 1005  | 0.43 | -1.22 | -1.27 | -3.07 |
| YML063W    | RPS1B      | 1442  | 3396  | 0.42 | -1.24 | -1.29 | -3.12 |
| YDR520C    |            | 972   | 2316  | 0.42 | -1.25 | -1.31 | -3.16 |

|         |       |      |      |      |       |       |       |
|---------|-------|------|------|------|-------|-------|-------|
| YER091C | MET6  | 1601 | 4003 | 0.40 | -1.32 | -1.38 | -3.33 |
| YNR058W | BIO3  | 633  | 1590 | 0.40 | -1.33 | -1.38 | -3.34 |
| YPL135W | ISU1  | 665  | 1674 | 0.40 | -1.33 | -1.39 | -3.35 |
| YCRO35C | RRP43 | 408  | 1118 | 0.36 | -1.45 | -1.51 | -3.65 |
| YPR015C |       | 329  | 915  | 0.36 | -1.47 | -1.53 | -3.70 |
| YKR050W | TRK2  | 838  | 2357 | 0.36 | -1.49 | -1.55 | -3.74 |
| YLR172C | DPH5  | 549  | 1605 | 0.34 | -1.55 | -1.61 | -3.88 |
| YPL250C |       | 521  | 1546 | 0.34 | -1.57 | -1.63 | -3.93 |
