# Supplementary material for: Genome-scale approaches for discovering novel nonconventional splicing substrates of the Ire1 nuclease
Source: PubMed Central journal article supplement (PMC549064; doi:10.1186/gb-2004-6-1-r3), 2004-12-22
Supplement: gb-2004-6-1-r3-s2.pdf [file gb-2004-6-1-r3-s2.pdf]

Supplimentary Table 2

| ORF     | 5'    | 3'    | 5' stem | loop      | 3' stem |
|---------|-------|-------|---------|-----------|---------|
| YBR140C | 10126 | 10142 | TTCT    | TCTGATGAG | AGAA    |
| YBR284W | 1970  | 1986  | AAGC    | CCCGACGGG | GCTT    |
| YDL115C | 832   | 848   | TTTC    | TCCGGTGTG | GAAA    |
| YDR279W | -596  | -580  | ACAT    | CCAGTTGTG | ATGT    |
| YDR323C | 1593  | 1609  | TTGG    | TCCGCGGAG | CCAA    |
| YDR477W | -888  | -872  | TTTG    | TCTGGAGGG | CAAA    |
| YER007W | 1178  | 1194  | CCAA    | TCTGCCGCG | TTGG    |
| YER103W | 1263  | 1279  | AAAA    | TCGGAAGTG | TTTT    |
| YER147C | 1724  | 1740  | GCCG    | CCAGCAGGG | CGGC    |
| YFL031W | 654   | 670   | TAAT    | CCAGCCGTG | ATTA    |
| YFL031W | 906   | 922   | ACTG    | TCCGAAGCG | CAGT    |
| YFL061W | 48    | 64    | CATT    | CCAGTGGTG | AATG    |
| YGL014W | 3304  | 3320  | AACT    | CCGGTAGTG | AGTT    |
| YGL124C | 2614  | 2630  | TTTC    | TCTGCCGGG | GAAA    |
| YGL197W | 3879  | 3895  | AGAT    | TCTGCTGAG | ATCT    |
| YGR111W | 283   | 299   | GTTT    | CCAGTTGCG | AAAC    |
| YGR178C | 2013  | 2029  | GTAT    | CCAGGAGGG | ATAC    |
| YGR200C | 352   | 368   | TCAG    | TCGGTTGTG | CTGA    |
| YGR210C | -311  | -295  | TAGC    | CCTGATGGG | GCTA    |
| YGR250C | 1019  | 1035  | ACTT    | TCCGAAGAG | AAGT    |
| YHR037W | 1167  | 1183  | AATT    | TCTGGTGGG | AATT    |
| YHR092C | -566  | -550  | TCTT    | TCTGTGGAG | AAGA    |
| YIL036W | 1086  | 1102  | TACT    | CCAGCGGAG | AGTA    |
| YIR002C | 1623  | 1639  | GAGC    | TCTGAAGAG | GCTC    |
| YKL130C | 1003  | 1019  | CTCC    | TCTGATGTG | GGAG    |
| YKL157W | 3478  | 3494  | TTCC    | TCCGATGTG | GGAA    |
| YKR018C | 1758  | 1774  | AATG    | TCTGAAGAG | CATT    |
| YLR266C | 944   | 960   | TATG    | CCAGGGGTG | CATA    |
| YLR417W | 2086  | 2102  | AATT    | CCTGTGGCG | AATT    |
| YML093W | 657   | 673   | TGGC    | TCAGGTGAG | GCCA    |

|         |      |      |      |           |      |
|---------|------|------|------|-----------|------|
| YML131W | 793  | 809  | ATAG | CCTGTGGTG | CTAT |
| YMR008C | 1392 | 1408 | TGTT | CCAGATGTG | AACA |
| YMR012W | -276 | -260 | ACTC | CCCGTAGCG | GAGT |
| YMR315W | 1611 | 1627 | ACGA | CCAGAAGTG | TCGT |
| YNL072W | 627  | 643  | GGAT | CCCGATGAG | ATCC |
| YNL115C | 162  | 178  | TGAA | TCCGATGGG | TTCA |
| YNL177C | 1688 | 1704 | AGTA | CCTGGAGCG | TACT |
| YNL221C | -650 | -634 | TTAC | TCGGTCGAG | GTAA |
| YNL236W | 1512 | 1528 | TCCA | TCGGTTGAG | TGGA |
| YNL248C | 1338 | 1354 | TCCT | CCTGATGAG | AGGA |
| YNL262W | -878 | -862 | TATT | CCAGATGAG | AATA |
| YNL335W | 48   | 64   | CATT | CCAGTGGTG | AATG |
| YOR154W | 609  | 625  | CAAT | CCAGAAGCG | ATTG |
| YOR176W | 741  | 757  | CTAC | CCAGCTGAG | GTAG |
| YOR209C | 414  | 430  | AATA | TCAGAAGCG | TATT |
| YOR249C | 621  | 637  | GATC | TCGGTGGAG | GATC |
| YOR315W | 1492 | 1508 | GCAA | TCAGCTGTG | TTGC |
| YPL179W | 255  | 271  | CATT | CCTGGTGAG | AATG |
| YPL270W | 1160 | 1176 | TTTT | TCAGGTGGG | AAAA |
| YPR118W | 1198 | 1214 | AATT | CCAGTGGTG | AATT |
| YPR128C | 657  | 673  | TTTG | TCAGCAGTG | CAAA |
