# Supplementary material for: Genome-scale approaches for discovering novel nonconventional splicing substrates of the Ire1 nuclease
Source: PubMed Central journal article supplement (PMC549064; doi:10.1186/gb-2004-6-1-r3), 2004-12-22
Supplement: gb-2004-6-1-r3-s3.pdf [file gb-2004-6-1-r3-s3.pdf]

Niwa et al.

Supplementary Table 3

| ORF ID  | Name   | X=Cy3 | Y=Cy5 | (X/Y) | log2(X/Y) | X/Y)-mean(log2(X/Y)) | Nsigma |
|---------|--------|-------|-------|-------|-----------|----------------------|--------|
| YFL031W | HAC1   | 40988 | 14536 | 2.82  | 1.50      | 1.38                 | 5.03   |
| YLR413W |        | 8846  | 4207  | 2.10  | 1.07      | 0.96                 | 3.49   |
| YKR075C |        | 4689  | 2305  | 2.03  | 1.02      | 0.91                 | 3.32   |
| YDR033W | MRH1   | 8157  | 4067  | 2.01  | 1.00      | 0.89                 | 3.24   |
| YDR345C | HXT3   | 1177  | 592   | 1.99  | 0.99      | 0.88                 | 3.20   |
| YDR146C | SWI5   | 4108  | 2117  | 1.94  | 0.96      | 0.84                 | 3.07   |
| YGR245C |        | 1832  | 947   | 1.93  | 0.95      | 0.84                 | 3.05   |
| YOR154W |        | 2979  | 1546  | 1.93  | 0.95      | 0.83                 | 3.03   |
| YHR159W |        | 1614  | 841   | 1.92  | 0.94      | 0.83                 | 3.01   |
| YDL148C |        | 5296  | 2771  | 1.91  | 0.93      | 0.82                 | 2.99   |
| YOR294W | RRS1   | 7955  | 4236  | 1.88  | 0.91      | 0.80                 | 2.90   |
| YOR293W | RPS10A | 5966  | 3197  | 1.87  | 0.90      | 0.79                 | 2.86   |
| YPR002W | PDH1   | 1189  | 651   | 1.83  | 0.87      | 0.76                 | 2.75   |
| YPR112C | MRD1   | 8712  | 4872  | 1.79  | 0.84      | 0.73                 | 2.64   |
| YMR273C | ZDS1   | 3537  | 1978  | 1.79  | 0.84      | 0.73                 | 2.64   |
| YLL011W | SOF1   | 14004 | 7841  | 1.79  | 0.84      | 0.72                 | 2.63   |
| YCRO57C | PWP2   | 4625  | 2602  | 1.78  | 0.83      | 0.72                 | 2.61   |
| YHR186C |        | 1967  | 1112  | 1.77  | 0.82      | 0.71                 | 2.58   |
| YJL033W | HCA4   | 5599  | 3177  | 1.76  | 0.82      | 0.71                 | 2.56   |
| YIL019W |        | 2757  | 1571  | 1.76  | 0.81      | 0.70                 | 2.54   |
| YKL078W |        | 3530  | 2012  | 1.75  | 0.81      | 0.70                 | 2.54   |
| YMR032W | HOF1   | 3824  | 2183  | 1.75  | 0.81      | 0.70                 | 2.53   |
| YNL068C | FKH2   | 4923  | 2824  | 1.74  | 0.80      | 0.69                 | 2.51   |
| YGR103W |        | 10282 | 5904  | 1.74  | 0.80      | 0.69                 | 2.50   |
| YNL198C |        | 891   | 512   | 1.74  | 0.80      | 0.69                 | 2.50   |
| YNL062C | GCD10  | 8647  | 4974  | 1.74  | 0.80      | 0.69                 | 2.49   |
| YLR184W |        | 544   | 313   | 1.74  | 0.80      | 0.69                 | 2.49   |
| YGL116W | CDC20  | 1151  | 664   | 1.73  | 0.79      | 0.68                 | 2.48   |
| YPR119W | CLB2   | 5969  | 3445  | 1.73  | 0.79      | 0.68                 | 2.47   |

|           |        |       |       |      |      |      |      |
|-----------|--------|-------|-------|------|------|------|------|
| YMR230W   | RPS10B | 5181  | 2992  | 1.73 | 0.79 | 0.68 | 2.47 |
| YNL182C   |        | 8142  | 4703  | 1.73 | 0.79 | 0.68 | 2.47 |
| YML080W   |        | 6086  | 3524  | 1.73 | 0.79 | 0.68 | 2.46 |
| YOR234C   | RPL33B | 21304 | 12359 | 1.72 | 0.79 | 0.67 | 2.45 |
| YJL109C   |        | 4964  | 2889  | 1.72 | 0.78 | 0.67 | 2.43 |
| YKL029C   | MAE1   | 5677  | 3312  | 1.71 | 0.78 | 0.67 | 2.42 |
| YCLX02C   |        | 5535  | 3232  | 1.71 | 0.78 | 0.66 | 2.41 |
| YML034W   | SRC1   | 1839  | 1074  | 1.71 | 0.78 | 0.66 | 2.41 |
| YFL051C   |        | 530   | 310   | 1.71 | 0.77 | 0.66 | 2.41 |
| YIL131C   | FKH1   | 8729  | 5110  | 1.71 | 0.77 | 0.66 | 2.40 |
| YPL155C   | KIP2   | 7139  | 4204  | 1.70 | 0.76 | 0.65 | 2.37 |
| YKR099W   | BAS1   | 2171  | 1280  | 1.70 | 0.76 | 0.65 | 2.36 |
| YIL091C   |        | 11608 | 6887  | 1.69 | 0.75 | 0.64 | 2.33 |
| YDR465C   | RMT2   | 11102 | 6597  | 1.68 | 0.75 | 0.64 | 2.32 |
| YKL027W   |        | 3614  | 2152  | 1.68 | 0.75 | 0.64 | 2.31 |
| YMR193C-A |        | 1765  | 1051  | 1.68 | 0.75 | 0.64 | 2.31 |
| YOR302W   |        | 3568  | 2125  | 1.68 | 0.75 | 0.64 | 2.31 |
| YDR399W   | HPT1   | 26517 | 15859 | 1.67 | 0.74 | 0.63 | 2.29 |
| YDL055C   | PSA1   | 18489 | 11066 | 1.67 | 0.74 | 0.63 | 2.28 |
| YNR053C   |        | 15322 | 9228  | 1.66 | 0.73 | 0.62 | 2.25 |
| YLR276C   | DBP9   | 17308 | 10451 | 1.66 | 0.73 | 0.62 | 2.24 |
| YOR272W   | YTM1   | 10016 | 6049  | 1.66 | 0.73 | 0.62 | 2.24 |
| YLR014C   | PPR1   | 1854  | 1121  | 1.65 | 0.73 | 0.61 | 2.23 |
| YCR055C   |        | 9098  | 5512  | 1.65 | 0.72 | 0.61 | 2.22 |
| YCR006C   |        | 1322  | 806   | 1.64 | 0.71 | 0.60 | 2.19 |
| YHR103W   | SBE22  | 5649  | 3445  | 1.64 | 0.71 | 0.60 | 2.19 |
| YBL039C   | URA7   | 9636  | 5878  | 1.64 | 0.71 | 0.60 | 2.18 |
| YOR146W   |        | 13527 | 8254  | 1.64 | 0.71 | 0.60 | 2.18 |
| YER111C   | SWI4   | 4436  | 2723  | 1.63 | 0.70 | 0.59 | 2.15 |
| YJR089W   | BIR1   | 1979  | 1216  | 1.63 | 0.70 | 0.59 | 2.15 |
| YKR057W   | RPS21A | 17884 | 10991 | 1.63 | 0.70 | 0.59 | 2.15 |
| YIL149C   |        | 3701  | 2277  | 1.63 | 0.70 | 0.59 | 2.14 |
| YPL141C   |        | 2979  | 1837  | 1.62 | 0.70 | 0.58 | 2.13 |
| YOR361C   | PRT1   | 16420 | 10154 | 1.62 | 0.69 | 0.58 | 2.11 |
| YFR053C   | HXK1   | 10560 | 6539  | 1.61 | 0.69 | 0.58 | 2.11 |
| YDR497C   | ITR1   | 3911  | 2422  | 1.61 | 0.69 | 0.58 | 2.11 |

|           |        |       |       |      |      |      |      |
|-----------|--------|-------|-------|------|------|------|------|
| YJL010C   |        | 8513  | 5275  | 1.61 | 0.69 | 0.58 | 2.10 |
| YLR222C   |        | 5754  | 3566  | 1.61 | 0.69 | 0.58 | 2.10 |
| YJL098W   | SAP185 | 6269  | 3890  | 1.61 | 0.69 | 0.58 | 2.09 |
| YGL078C   | DBP3   | 6180  | 3835  | 1.61 | 0.69 | 0.58 | 2.09 |
| YPL143W   | RPL33A | 14577 | 9049  | 1.61 | 0.69 | 0.58 | 2.09 |
| YHR091C   | MSR1   | 618   | 384   | 1.61 | 0.69 | 0.57 | 2.09 |
| YHR032W   |        | 474   | 295   | 1.61 | 0.69 | 0.57 | 2.08 |
| YGR025W   |        | 1724  | 1073  | 1.61 | 0.68 | 0.57 | 2.08 |
| YBR012W-A |        | 10059 | 6288  | 1.60 | 0.68 | 0.57 | 2.06 |
| YCL063W   |        | 4869  | 3049  | 1.60 | 0.68 | 0.56 | 2.05 |
| YGR089W   |        | 3389  | 2122  | 1.60 | 0.68 | 0.56 | 2.05 |
| YNL296W   |        | 548   | 345   | 1.59 | 0.67 | 0.56 | 2.02 |
| YDR212W   | TCP1   | 1300  | 819   | 1.59 | 0.67 | 0.55 | 2.02 |
| YBR027C   |        | 1296  | 817   | 1.59 | 0.67 | 0.55 | 2.01 |
| YGL170C   |        | 909   | 574   | 1.58 | 0.66 | 0.55 | 2.00 |
| YKR094C   | RPL40B | 10707 | 6763  | 1.58 | 0.66 | 0.55 | 2.00 |
| YKR081C   |        | 4761  | 3011  | 1.58 | 0.66 | 0.55 | 2.00 |
| YDR060W   |        | 1381  | 874   | 1.58 | 0.66 | 0.55 | 1.99 |
| YDR269C   |        | 744   | 471   | 1.58 | 0.66 | 0.55 | 1.99 |
| YLR074C   |        | 9646  | 6116  | 1.58 | 0.66 | 0.54 | 1.98 |
| YHR145C   |        | 2909  | 1845  | 1.58 | 0.66 | 0.54 | 1.98 |
| YMR001C   | CDC5   | 7106  | 4508  | 1.58 | 0.66 | 0.54 | 1.98 |
| YMR185W   |        | 3761  | 2389  | 1.57 | 0.65 | 0.54 | 1.97 |
| YHR179W   | OYE2   | 4715  | 2999  | 1.57 | 0.65 | 0.54 | 1.96 |
| YGR087C   | PDC6   | 2596  | 1652  | 1.57 | 0.65 | 0.54 | 1.96 |
| YGL076C   | RPL7A  | 2488  | 1584  | 1.57 | 0.65 | 0.54 | 1.96 |
| YLR086W   | SMC4   | 1579  | 1006  | 1.57 | 0.65 | 0.54 | 1.96 |
| YER054C   | GIP2   | 1065  | 679   | 1.57 | 0.65 | 0.54 | 1.95 |
| YDR343C   | HXT6   | 1524  | 974   | 1.56 | 0.65 | 0.53 | 1.94 |
| YDR449C   |        | 7733  | 4942  | 1.56 | 0.65 | 0.53 | 1.94 |
| YCR058C   |        | 2038  | 1303  | 1.56 | 0.65 | 0.53 | 1.94 |
| YHR182W   |        | 4174  | 2669  | 1.56 | 0.64 | 0.53 | 1.94 |
| YNL114C   |        | 16750 | 10720 | 1.56 | 0.64 | 0.53 | 1.93 |
| YNL226W   |        | 1290  | 826   | 1.56 | 0.64 | 0.53 | 1.93 |
| YMR080C   | NAM7   | 6931  | 4438  | 1.56 | 0.64 | 0.53 | 1.93 |
| YBR092C   | PHO3   | 15716 | 10065 | 1.56 | 0.64 | 0.53 | 1.93 |

|           |        |       |       |      |      |      |      |
|-----------|--------|-------|-------|------|------|------|------|
| YGR145W   |        | 5128  | 3286  | 1.56 | 0.64 | 0.53 | 1.93 |
| YGL158W   | RCK1   | 565   | 362   | 1.56 | 0.64 | 0.53 | 1.92 |
| YPR136C   |        | 2470  | 1584  | 1.56 | 0.64 | 0.53 | 1.92 |
| YGR159C   | NSR1   | 17155 | 11005 | 1.56 | 0.64 | 0.53 | 1.92 |
| YPR104C   | FHL1   | 1589  | 1020  | 1.56 | 0.64 | 0.53 | 1.92 |
| YOL124C   |        | 3532  | 2270  | 1.56 | 0.64 | 0.53 | 1.91 |
| YGR108W   | CLB1   | 8983  | 5773  | 1.56 | 0.64 | 0.53 | 1.91 |
| YLR278C   |        | 1162  | 747   | 1.56 | 0.64 | 0.53 | 1.91 |
| YDL242W   |        | 2392  | 1538  | 1.56 | 0.64 | 0.52 | 1.91 |
| YDR158W   | HOM2   | 13133 | 8446  | 1.55 | 0.64 | 0.52 | 1.91 |
| YPL079W   | RPL21B | 14750 | 9487  | 1.55 | 0.64 | 0.52 | 1.91 |
| YPL111W   | CAR1   | 7322  | 4711  | 1.55 | 0.64 | 0.52 | 1.90 |
| YBR190W   |        | 1546  | 995   | 1.55 | 0.64 | 0.52 | 1.90 |
| YMR031W-A |        | 503   | 324   | 1.55 | 0.63 | 0.52 | 1.90 |
| YBR029C   | CDS1   | 1784  | 1149  | 1.55 | 0.63 | 0.52 | 1.90 |
| YOR381W   | FRE3   | 2294  | 1478  | 1.55 | 0.63 | 0.52 | 1.90 |
| YDR299W   | BFR2   | 3228  | 2080  | 1.55 | 0.63 | 0.52 | 1.90 |
| YPR142C   |        | 3446  | 2222  | 1.55 | 0.63 | 0.52 | 1.89 |
| YCR056W   |        | 2122  | 1368  | 1.55 | 0.63 | 0.52 | 1.89 |
| YCL012W   |        | 1028  | 663   | 1.55 | 0.63 | 0.52 | 1.89 |
| YOR345C   |        | 4528  | 2921  | 1.55 | 0.63 | 0.52 | 1.89 |
| YBR178W   |        | 1191  | 769   | 1.55 | 0.63 | 0.52 | 1.88 |
| YPRO90W   |        | 2418  | 1563  | 1.55 | 0.63 | 0.52 | 1.88 |
| YDR164C   | SEC1   | 3433  | 2219  | 1.55 | 0.63 | 0.52 | 1.88 |
| YEL010W   |        | 447   | 289   | 1.55 | 0.63 | 0.52 | 1.88 |
| YDR020C   |        | 13986 | 9048  | 1.55 | 0.63 | 0.52 | 1.88 |
| YCR037C   | PHO87  | 8272  | 5352  | 1.55 | 0.63 | 0.52 | 1.88 |
| YPL126W   | NAN1   | 13832 | 8962  | 1.54 | 0.63 | 0.51 | 1.87 |
| YPL269W   | KAR9   | 4152  | 2692  | 1.54 | 0.63 | 0.51 | 1.86 |
| YOL078W   |        | 843   | 547   | 1.54 | 0.62 | 0.51 | 1.86 |
| YLR397C   | AFG2   | 4131  | 2681  | 1.54 | 0.62 | 0.51 | 1.86 |
| YPL093W   | NOG1   | 8026  | 5209  | 1.54 | 0.62 | 0.51 | 1.86 |
| YGR079W   |        | 13839 | 8982  | 1.54 | 0.62 | 0.51 | 1.86 |
| YGR128C   |        | 18601 | 12083 | 1.54 | 0.62 | 0.51 | 1.85 |
| YBR266C   |        | 6440  | 4185  | 1.54 | 0.62 | 0.51 | 1.85 |
| YJL061W   | NUP82  | 4522  | 2939  | 1.54 | 0.62 | 0.51 | 1.85 |

|         |       |       |       |      |      |      |      |
|---------|-------|-------|-------|------|------|------|------|
| YGL014W |       | 3341  | 2172  | 1.54 | 0.62 | 0.51 | 1.85 |
| YMR290C | HAS1  | 13822 | 8998  | 1.54 | 0.62 | 0.51 | 1.84 |
| YGR059W | SPR3  | 562   | 366   | 1.54 | 0.62 | 0.51 | 1.84 |
| YPL073C |       | 1076  | 702   | 1.53 | 0.62 | 0.50 | 1.83 |
| YIL031W | SMT4  | 2484  | 1622  | 1.53 | 0.61 | 0.50 | 1.83 |
| YER155C | BEM2  | 473   | 309   | 1.53 | 0.61 | 0.50 | 1.82 |
| YLR272C | LOC7  | 4375  | 2858  | 1.53 | 0.61 | 0.50 | 1.82 |
| YCR092C | MSH3  | 2316  | 1513  | 1.53 | 0.61 | 0.50 | 1.82 |
| YJL135W |       | 577   | 377   | 1.53 | 0.61 | 0.50 | 1.82 |
| YMR131C |       | 12194 | 7977  | 1.53 | 0.61 | 0.50 | 1.82 |
| YKL166C | TPK3  | 1139  | 745   | 1.53 | 0.61 | 0.50 | 1.82 |
| YPL005W |       | 880   | 576   | 1.53 | 0.61 | 0.50 | 1.82 |
| YPR190C | RPC82 | 5937  | 3888  | 1.53 | 0.61 | 0.50 | 1.81 |
| YAR040C |       | 554   | 363   | 1.53 | 0.61 | 0.50 | 1.81 |
| YER160C |       | 15573 | 10213 | 1.52 | 0.61 | 0.50 | 1.80 |
| YNL207W |       | 5688  | 3733  | 1.52 | 0.61 | 0.50 | 1.80 |
| YPR196W |       | 965   | 634   | 1.52 | 0.61 | 0.49 | 1.80 |
| YOR206W |       | 11126 | 7314  | 1.52 | 0.61 | 0.49 | 1.79 |
| YBL097W | BRN1  | 2913  | 1915  | 1.52 | 0.61 | 0.49 | 1.79 |
| YJL209W | CBP1  | 4600  | 3025  | 1.52 | 0.60 | 0.49 | 1.79 |
| YKL109W | HAP4  | 1926  | 1267  | 1.52 | 0.60 | 0.49 | 1.79 |
| YPL261C |       | 1333  | 877   | 1.52 | 0.60 | 0.49 | 1.79 |
| YDR481C | PHO8  | 1665  | 1097  | 1.52 | 0.60 | 0.49 | 1.78 |
| YDR406W | PDR15 | 2055  | 1354  | 1.52 | 0.60 | 0.49 | 1.78 |
| YGR205W |       | 5750  | 3799  | 1.51 | 0.60 | 0.49 | 1.77 |
| YGL021W | ALK1  | 8111  | 5359  | 1.51 | 0.60 | 0.49 | 1.77 |
| YPL183C |       | 6969  | 4607  | 1.51 | 0.60 | 0.48 | 1.76 |
| YKL182W | FAS1  | 2278  | 1506  | 1.51 | 0.60 | 0.48 | 1.76 |
| YOL076W | MDM20 | 8262  | 5467  | 1.51 | 0.60 | 0.48 | 1.76 |
| YJL051W |       | 8011  | 5301  | 1.51 | 0.60 | 0.48 | 1.76 |
| YHL015W | RPS20 | 39259 | 25999 | 1.51 | 0.59 | 0.48 | 1.75 |
| YGL188C |       | 8380  | 5552  | 1.51 | 0.59 | 0.48 | 1.75 |
| YOL128C |       | 4063  | 2694  | 1.51 | 0.59 | 0.48 | 1.75 |
| YHL008C |       | 1155  | 766   | 1.51 | 0.59 | 0.48 | 1.75 |
| YLR357W | RSC2  | 7200  | 4781  | 1.51 | 0.59 | 0.48 | 1.74 |
| YDR521W |       | 1055  | 701   | 1.51 | 0.59 | 0.48 | 1.74 |

|           |        |       |       |      |      |      |      |
|-----------|--------|-------|-------|------|------|------|------|
| YMR216C   | SKY1   | 2503  | 1663  | 1.51 | 0.59 | 0.48 | 1.74 |
| YBR202W   | CDC47  | 3057  | 2031  | 1.51 | 0.59 | 0.48 | 1.74 |
| YNL126W   | SPC98  | 3411  | 2267  | 1.50 | 0.59 | 0.48 | 1.73 |
| YHR157W   | REC104 | 3193  | 2123  | 1.50 | 0.59 | 0.48 | 1.73 |
| YNL065W   |        | 1277  | 850   | 1.50 | 0.59 | 0.47 | 1.73 |
| YJR128W   |        | 1403  | 934   | 1.50 | 0.59 | 0.47 | 1.72 |
| YOR001W   | RRP6   | 2306  | 1536  | 1.50 | 0.59 | 0.47 | 1.72 |
| YJR140C   | HIR3   | 2037  | 1357  | 1.50 | 0.59 | 0.47 | 1.72 |
| YGL030W   | RPL30  | 14697 | 9795  | 1.50 | 0.59 | 0.47 | 1.72 |
| YML035C-A |        | 1087  | 725   | 1.50 | 0.58 | 0.47 | 1.71 |
| YOL160W   |        | 2842  | 1896  | 1.50 | 0.58 | 0.47 | 1.71 |
| YNL141W   | AAH1   | 22648 | 15112 | 1.50 | 0.58 | 0.47 | 1.71 |
| YMR093W   |        | 12699 | 8475  | 1.50 | 0.58 | 0.47 | 1.71 |
| YHR201C   | PPX1   | 3126  | 2087  | 1.50 | 0.58 | 0.47 | 1.71 |
| YAR047C   |        | 532   | 355   | 1.50 | 0.58 | 0.47 | 1.71 |
| YML043C   | RRN11  | 1974  | 1319  | 1.50 | 0.58 | 0.47 | 1.71 |
| YDR080W   | VPS41  | 2149  | 1439  | 1.49 | 0.58 | 0.47 | 1.70 |
| YJR033C   |        | 452   | 303   | 1.49 | 0.58 | 0.47 | 1.70 |
| YNL162W   | RPL42A | 19791 | 13264 | 1.49 | 0.58 | 0.46 | 1.69 |
| YNL120C   |        | 10801 | 7239  | 1.49 | 0.58 | 0.46 | 1.69 |
| YLR325C   | RPL38  | 24038 | 16114 | 1.49 | 0.58 | 0.46 | 1.69 |
| YPL029W   | SUV3   | 3437  | 2304  | 1.49 | 0.58 | 0.46 | 1.69 |
| YLR190W   |        | 5277  | 3538  | 1.49 | 0.58 | 0.46 | 1.69 |
| YOL144W   | NOP8   | 3497  | 2346  | 1.49 | 0.58 | 0.46 | 1.69 |
| YCL054W   | SPB1   | 4388  | 2945  | 1.49 | 0.58 | 0.46 | 1.68 |
| YOR135C   |        | 7848  | 5273  | 1.49 | 0.57 | 0.46 | 1.68 |
| YDR245W   | MNN10  | 5423  | 3644  | 1.49 | 0.57 | 0.46 | 1.68 |
| YHR059W   |        | 15002 | 10091 | 1.49 | 0.57 | 0.46 | 1.67 |
| YELO65W   | SIT1   | 16614 | 11176 | 1.49 | 0.57 | 0.46 | 1.67 |
| YBR298C   | MAL31  | 1880  | 1265  | 1.49 | 0.57 | 0.46 | 1.67 |
| YIL148W   | RPL40A | 20476 | 13789 | 1.48 | 0.57 | 0.46 | 1.67 |
| YHR079C   | IRE1   | 2446  | 1647  | 1.48 | 0.57 | 0.46 | 1.67 |
| YIL162W   | SUC2   | 6353  | 4281  | 1.48 | 0.57 | 0.46 | 1.66 |
| YDL117W   |        | 3431  | 2314  | 1.48 | 0.57 | 0.46 | 1.66 |
| YLR313C   | SPH1   | 5113  | 3448  | 1.48 | 0.57 | 0.46 | 1.66 |
| YDL077C   | VAM6   | 841   | 567   | 1.48 | 0.57 | 0.46 | 1.66 |

|         |        |       |       |      |      |      |      |
|---------|--------|-------|-------|------|------|------|------|
| YDR450W | RPS18A | 10545 | 7117  | 1.48 | 0.57 | 0.45 | 1.65 |
| YIL047C | SYG1   | 5069  | 3423  | 1.48 | 0.57 | 0.45 | 1.65 |
| YPL102C |        | 2559  | 1729  | 1.48 | 0.57 | 0.45 | 1.65 |
| YMR194W | RPL36A | 2548  | 1722  | 1.48 | 0.57 | 0.45 | 1.65 |
| YDL196W |        | 503   | 340   | 1.48 | 0.57 | 0.45 | 1.65 |
| YIL096C |        | 5199  | 3515  | 1.48 | 0.56 | 0.45 | 1.64 |
| YBR113W |        | 2042  | 1381  | 1.48 | 0.56 | 0.45 | 1.64 |
| YDR375C | BCS1   | 9438  | 6382  | 1.48 | 0.56 | 0.45 | 1.64 |
| YCL061C |        | 435   | 294   | 1.48 | 0.56 | 0.45 | 1.64 |
| YNL228W |        | 3701  | 2504  | 1.48 | 0.56 | 0.45 | 1.64 |
| YLR401C |        | 5975  | 4046  | 1.48 | 0.56 | 0.45 | 1.64 |
| YJR145C | RPS4A  | 3394  | 2299  | 1.48 | 0.56 | 0.45 | 1.64 |
| YPL193W | RSA1   | 5710  | 3876  | 1.47 | 0.56 | 0.45 | 1.62 |
| YNL119W |        | 18134 | 12314 | 1.47 | 0.56 | 0.45 | 1.62 |
| YCL023C |        | 540   | 367   | 1.47 | 0.56 | 0.44 | 1.62 |
| YOLO46C |        | 987   | 671   | 1.47 | 0.56 | 0.44 | 1.62 |
| YJR115W |        | 1285  | 874   | 1.47 | 0.56 | 0.44 | 1.61 |
| YER105C | NUP157 | 8246  | 5611  | 1.47 | 0.56 | 0.44 | 1.61 |
| YFR057W |        | 786   | 535   | 1.47 | 0.56 | 0.44 | 1.61 |
| YPR156C |        | 2005  | 1365  | 1.47 | 0.56 | 0.44 | 1.61 |
| YDR331W | GPI8   | 6533  | 4447  | 1.47 | 0.55 | 0.44 | 1.61 |
| YMR132C |        | 3880  | 2641  | 1.47 | 0.55 | 0.44 | 1.61 |
| YHL039W |        | 18521 | 12610 | 1.47 | 0.55 | 0.44 | 1.61 |
| YAL048C |        | 1527  | 1040  | 1.47 | 0.55 | 0.44 | 1.61 |
| YGR289C | MAL11  | 3035  | 2067  | 1.47 | 0.55 | 0.44 | 1.61 |
| YKR079C |        | 4869  | 3319  | 1.47 | 0.55 | 0.44 | 1.60 |
| YNL087W |        | 5999  | 4089  | 1.47 | 0.55 | 0.44 | 1.60 |
| YFL032W |        | 2368  | 1614  | 1.47 | 0.55 | 0.44 | 1.60 |
| YGL236C | MTO1   | 7140  | 4868  | 1.47 | 0.55 | 0.44 | 1.60 |
| YNL338W |        | 524   | 357   | 1.47 | 0.55 | 0.44 | 1.60 |
| YPL033C |        | 625   | 426   | 1.47 | 0.55 | 0.44 | 1.60 |
| YCL051W | LRE1   | 1131  | 771   | 1.47 | 0.55 | 0.44 | 1.60 |
| YMR128W | ECM16  | 1300  | 887   | 1.47 | 0.55 | 0.44 | 1.60 |
| YPL242C | IQG1   | 2299  | 1569  | 1.47 | 0.55 | 0.44 | 1.60 |
| YPL012W |        | 10577 | 7218  | 1.47 | 0.55 | 0.44 | 1.60 |
| YBR172C | SMY2   | 4161  | 2840  | 1.47 | 0.55 | 0.44 | 1.60 |

|           |        |       |       |      |      |      |      |
|-----------|--------|-------|-------|------|------|------|------|
| YNL124W   |        | 6545  | 4468  | 1.46 | 0.55 | 0.44 | 1.59 |
| YNL256W   | FOL1   | 5316  | 3631  | 1.46 | 0.55 | 0.44 | 1.59 |
| YGL128C   |        | 526   | 360   | 1.46 | 0.55 | 0.44 | 1.58 |
| YPL243W   | SRP68  | 19541 | 13366 | 1.46 | 0.55 | 0.44 | 1.58 |
| YMR011W   | HXT2   | 25881 | 17703 | 1.46 | 0.55 | 0.44 | 1.58 |
| YGR265W   |        | 4257  | 2913  | 1.46 | 0.55 | 0.43 | 1.58 |
| YDR447C   | RPS17B | 20113 | 13766 | 1.46 | 0.55 | 0.43 | 1.58 |
| YCL014W   | BUD3   | 3452  | 2363  | 1.46 | 0.55 | 0.43 | 1.58 |
| YGL190C   | CDC55  | 7040  | 4820  | 1.46 | 0.55 | 0.43 | 1.58 |
| YDR195W   | REF2   | 2734  | 1872  | 1.46 | 0.55 | 0.43 | 1.58 |
| YNL186W   | UBP10  | 16589 | 11361 | 1.46 | 0.55 | 0.43 | 1.58 |
| YLR302C   |        | 1095  | 750   | 1.46 | 0.55 | 0.43 | 1.58 |
| YPR022C   |        | 3934  | 2695  | 1.46 | 0.55 | 0.43 | 1.58 |
| YHR140W   |        | 6325  | 4334  | 1.46 | 0.55 | 0.43 | 1.57 |
| YJL217W   |        | 8775  | 6013  | 1.46 | 0.55 | 0.43 | 1.57 |
| YMR224C   | MRE11  | 541   | 371   | 1.46 | 0.55 | 0.43 | 1.57 |
| YBR250W   |        | 1378  | 945   | 1.46 | 0.54 | 0.43 | 1.57 |
| YOL166C   |        | 439   | 301   | 1.46 | 0.54 | 0.43 | 1.57 |
| YMR031C   |        | 7789  | 5343  | 1.46 | 0.54 | 0.43 | 1.57 |
| YJL087C   | TRL1   | 3234  | 2219  | 1.46 | 0.54 | 0.43 | 1.57 |
| YCL029C   | BIK1   | 1805  | 1239  | 1.46 | 0.54 | 0.43 | 1.56 |
| YJR072C   |        | 5137  | 3528  | 1.46 | 0.54 | 0.43 | 1.56 |
| YMR049C   |        | 15407 | 10581 | 1.46 | 0.54 | 0.43 | 1.56 |
| YDR443C   | SSN2   | 1753  | 1204  | 1.46 | 0.54 | 0.43 | 1.56 |
| YGL146C   |        | 700   | 481   | 1.46 | 0.54 | 0.43 | 1.56 |
| YLR434C   |        | 2055  | 1412  | 1.46 | 0.54 | 0.43 | 1.56 |
| YML006C   | GIS4   | 2067  | 1421  | 1.45 | 0.54 | 0.43 | 1.56 |
| YLR419W   |        | 1798  | 1236  | 1.45 | 0.54 | 0.43 | 1.56 |
| YDR025W   | RPS11A | 11126 | 7652  | 1.45 | 0.54 | 0.43 | 1.56 |
| YDL071C   |        | 919   | 632   | 1.45 | 0.54 | 0.43 | 1.55 |
| YMR119W   |        | 3445  | 2370  | 1.45 | 0.54 | 0.43 | 1.55 |
| YDR237W   | MRPL7  | 1210  | 833   | 1.45 | 0.54 | 0.43 | 1.55 |
| YPR018W   | RLF2   | 3727  | 2566  | 1.45 | 0.54 | 0.43 | 1.55 |
| YKL142W   | MRP8   | 466   | 321   | 1.45 | 0.54 | 0.43 | 1.55 |
| YML032C-A |        | 1824  | 1256  | 1.45 | 0.54 | 0.43 | 1.55 |
| YCL053C   |        | 9166  | 6313  | 1.45 | 0.54 | 0.43 | 1.55 |



|         |        |       |       |      |      |      |      |
|---------|--------|-------|-------|------|------|------|------|
| YOR333C |        | 1813  | 1249  | 1.45 | 0.54 | 0.42 | 1.55 |
| YFR023W | PES4   | 425   | 293   | 1.45 | 0.54 | 0.42 | 1.54 |
| YHR197W |        | 830   | 572   | 1.45 | 0.54 | 0.42 | 1.54 |
| YDL194W | SNF3   | 1095  | 755   | 1.45 | 0.54 | 0.42 | 1.54 |
| YLR002C |        | 13922 | 9600  | 1.45 | 0.54 | 0.42 | 1.54 |
| YDR120C | TRM1   | 15731 | 10848 | 1.45 | 0.54 | 0.42 | 1.54 |
| YMR163C |        | 1099  | 758   | 1.45 | 0.54 | 0.42 | 1.54 |
| YOR066W |        | 1988  | 1371  | 1.45 | 0.54 | 0.42 | 1.54 |
| YDR283C | GCN2   | 455   | 314   | 1.45 | 0.54 | 0.42 | 1.54 |
| YGL094C | PAN2   | 1993  | 1375  | 1.45 | 0.54 | 0.42 | 1.54 |
| YOR218C |        | 2763  | 1906  | 1.45 | 0.54 | 0.42 | 1.54 |
| YER164W | CHD1   | 5717  | 3946  | 1.45 | 0.53 | 0.42 | 1.54 |
| YHR055C | CUP1-2 | 8966  | 6189  | 1.45 | 0.53 | 0.42 | 1.54 |
| YGR125W |        | 3765  | 2599  | 1.45 | 0.53 | 0.42 | 1.54 |
| YMR144W |        | 4982  | 3439  | 1.45 | 0.53 | 0.42 | 1.54 |
| YIL115C | NUP159 | 1897  | 1310  | 1.45 | 0.53 | 0.42 | 1.53 |
| YNL112W | DBP2   | 20098 | 13876 | 1.45 | 0.53 | 0.42 | 1.53 |
| YJR158W | HXT16  | 1951  | 1347  | 1.45 | 0.53 | 0.42 | 1.53 |
| YDL164C | CDC9   | 2960  | 2044  | 1.45 | 0.53 | 0.42 | 1.53 |
| YHR189W |        | 1835  | 1267  | 1.45 | 0.53 | 0.42 | 1.53 |
| YMR259C |        | 815   | 563   | 1.45 | 0.53 | 0.42 | 1.53 |
| YMR177W | MMT1   | 2245  | 1552  | 1.45 | 0.53 | 0.42 | 1.53 |
| YHR021C | RPS27B | 12652 | 8754  | 1.45 | 0.53 | 0.42 | 1.52 |
| YGR093W |        | 5523  | 3824  | 1.44 | 0.53 | 0.42 | 1.52 |
| YDL003W | MCD1   | 4994  | 3458  | 1.44 | 0.53 | 0.42 | 1.52 |
| YER082C |        | 4827  | 3343  | 1.44 | 0.53 | 0.42 | 1.52 |
| YNL175C |        | 9861  | 6830  | 1.44 | 0.53 | 0.42 | 1.52 |
| YNL188W | KAR1   | 5940  | 4115  | 1.44 | 0.53 | 0.42 | 1.52 |
| YPL226W |        | 6480  | 4490  | 1.44 | 0.53 | 0.42 | 1.52 |
| YCRX03C |        | 390   | 270   | 1.44 | 0.53 | 0.42 | 1.52 |
| YJL086C |        | 1326  | 919   | 1.44 | 0.53 | 0.42 | 1.51 |
| YNL091W |        | 6302  | 4368  | 1.44 | 0.53 | 0.42 | 1.51 |
| YJR070C |        | 10161 | 7044  | 1.44 | 0.53 | 0.42 | 1.51 |
| YDR267C |        | 3003  | 2083  | 1.44 | 0.53 | 0.42 | 1.51 |
| YDL057W |        | 960   | 666   | 1.44 | 0.53 | 0.41 | 1.51 |
| YER187W |        | 402   | 279   | 1.44 | 0.53 | 0.41 | 1.51 |

|           |        |       |       |      |      |      |      |
|-----------|--------|-------|-------|------|------|------|------|
| YGR290W   |        | 1049  | 728   | 1.44 | 0.53 | 0.41 | 1.51 |
| YDL017W   | CDC7   | 3371  | 2342  | 1.44 | 0.53 | 0.41 | 1.50 |
| YDR179W-A |        | 1061  | 737   | 1.44 | 0.53 | 0.41 | 1.50 |
| YDR384C   |        | 13904 | 9670  | 1.44 | 0.52 | 0.41 | 1.50 |
| YLL031C   |        | 6644  | 4621  | 1.44 | 0.52 | 0.41 | 1.50 |
| YHR199C   |        | 1172  | 815   | 1.44 | 0.52 | 0.41 | 1.50 |
| YPL019C   |        | 16890 | 11750 | 1.44 | 0.52 | 0.41 | 1.49 |
| YDR170C   | SEC7   | 1844  | 1283  | 1.44 | 0.52 | 0.41 | 1.49 |
| YOR366W   |        | 364   | 253   | 1.44 | 0.52 | 0.41 | 1.49 |
| YER126C   |        | 24179 | 16833 | 1.44 | 0.52 | 0.41 | 1.49 |
| YDR297W   | SUR2   | 2498  | 1739  | 1.44 | 0.52 | 0.41 | 1.49 |
| YLR407W   |        | 3597  | 2506  | 1.44 | 0.52 | 0.41 | 1.49 |
| YJL189W   | RPL39  | 11234 | 7828  | 1.44 | 0.52 | 0.41 | 1.49 |
| YER097W   |        | 982   | 684   | 1.44 | 0.52 | 0.41 | 1.49 |
| YNL132W   |        | 6740  | 4697  | 1.43 | 0.52 | 0.41 | 1.49 |
| YPL189W   |        | 551   | 384   | 1.43 | 0.52 | 0.41 | 1.48 |
| YNL110C   |        | 27506 | 19176 | 1.43 | 0.52 | 0.41 | 1.48 |
| YAL019W   | FUN30  | 2912  | 2031  | 1.43 | 0.52 | 0.41 | 1.48 |
| YDL063C   |        | 4016  | 2802  | 1.43 | 0.52 | 0.41 | 1.48 |
| YDR408C   | ADE8   | 3136  | 2188  | 1.43 | 0.52 | 0.41 | 1.48 |
| YCR026C   |        | 2220  | 1549  | 1.43 | 0.52 | 0.41 | 1.48 |
| YHR163W   | SOL3   | 4000  | 2793  | 1.43 | 0.52 | 0.41 | 1.48 |
| YNL328C   | MDJ2   | 571   | 399   | 1.43 | 0.52 | 0.41 | 1.48 |
| YER106W   |        | 392   | 274   | 1.43 | 0.52 | 0.41 | 1.47 |
| YNL262W   | POL2   | 912   | 637   | 1.43 | 0.52 | 0.41 | 1.47 |
| YNL303W   |        | 5293  | 3699  | 1.43 | 0.52 | 0.40 | 1.47 |
| YLR359W   | ADE13  | 3589  | 2508  | 1.43 | 0.52 | 0.40 | 1.47 |
| YPL263C   | KEL3   | 12405 | 8670  | 1.43 | 0.52 | 0.40 | 1.47 |
| YPR168W   | NUT2   | 1049  | 733   | 1.43 | 0.52 | 0.40 | 1.47 |
| YHL023C   |        | 4619  | 3230  | 1.43 | 0.52 | 0.40 | 1.47 |
| YDR471W   | RPL27B | 22291 | 15590 | 1.43 | 0.52 | 0.40 | 1.47 |
| YBR057C   | MUM2   | 8931  | 6247  | 1.43 | 0.52 | 0.40 | 1.47 |
| YDL041W   |        | 688   | 481   | 1.43 | 0.52 | 0.40 | 1.47 |
| YOR106W   | VAM3   | 5054  | 3536  | 1.43 | 0.52 | 0.40 | 1.46 |
| YML109W   | ZDS2   | 1657  | 1160  | 1.43 | 0.51 | 0.40 | 1.46 |
| YDR363W   | ESC2   | 6869  | 4810  | 1.43 | 0.51 | 0.40 | 1.46 |

|           |        |       |       |      |      |      |      |
|-----------|--------|-------|-------|------|------|------|------|
| YDR024W   |        | 5516  | 3864  | 1.43 | 0.51 | 0.40 | 1.46 |
| YOL059W   | GPD2   | 21696 | 15209 | 1.43 | 0.51 | 0.40 | 1.45 |
| YPL267W   |        | 9684  | 6791  | 1.43 | 0.51 | 0.40 | 1.45 |
| YPL133C   |        | 2029  | 1423  | 1.43 | 0.51 | 0.40 | 1.45 |
| YKR095W   | MLP1   | 1866  | 1309  | 1.43 | 0.51 | 0.40 | 1.45 |
| YMR290W-A |        | 3824  | 2683  | 1.43 | 0.51 | 0.40 | 1.45 |
| YDL134C-A |        | 8550  | 6001  | 1.42 | 0.51 | 0.40 | 1.45 |
| YNL144C   |        | 1832  | 1286  | 1.42 | 0.51 | 0.40 | 1.45 |
| YPL207W   |        | 9439  | 6627  | 1.42 | 0.51 | 0.40 | 1.45 |
| YNR063W   |        | 748   | 525   | 1.42 | 0.51 | 0.40 | 1.45 |
| YCL059C   | KRR1   | 17102 | 12010 | 1.42 | 0.51 | 0.40 | 1.45 |
| YDR402C   | DIT2   | 659   | 463   | 1.42 | 0.51 | 0.40 | 1.44 |
| YOR188W   | MSB1   | 3608  | 2535  | 1.42 | 0.51 | 0.40 | 1.44 |
| YEL035C   | UTR5   | 386   | 271   | 1.42 | 0.51 | 0.40 | 1.44 |
| YEL055C   | POL5   | 4213  | 2962  | 1.42 | 0.51 | 0.40 | 1.44 |
| YML061C   | PIF1   | 1762  | 1239  | 1.42 | 0.51 | 0.40 | 1.44 |
| YJR112W   | NNF1   | 5579  | 3924  | 1.42 | 0.51 | 0.40 | 1.44 |
| YCR035C   | RRP43  | 1855  | 1305  | 1.42 | 0.51 | 0.40 | 1.44 |
| YDR136C   |        | 1290  | 908   | 1.42 | 0.51 | 0.39 | 1.44 |
| YLL009C   | COX17  | 13712 | 9649  | 1.42 | 0.51 | 0.39 | 1.43 |
| YPL125W   |        | 2349  | 1653  | 1.42 | 0.51 | 0.39 | 1.43 |
| YLR168C   | MSF1'  | 8823  | 6215  | 1.42 | 0.51 | 0.39 | 1.43 |
| YNL238W   | KEX2   | 5876  | 4141  | 1.42 | 0.50 | 0.39 | 1.43 |
| YKR027W   |        | 4247  | 2995  | 1.42 | 0.50 | 0.39 | 1.42 |
| YIR013C   | GAT4   | 380   | 268   | 1.42 | 0.50 | 0.39 | 1.42 |
| YLL013C   |        | 7643  | 5391  | 1.42 | 0.50 | 0.39 | 1.42 |
| YOR004W   |        | 25923 | 18292 | 1.42 | 0.50 | 0.39 | 1.42 |
| YEL017W   |        | 1085  | 766   | 1.42 | 0.50 | 0.39 | 1.42 |
| YBL035C   | POL12  | 2726  | 1924  | 1.42 | 0.50 | 0.39 | 1.42 |
| YNR003C   | RPC34  | 6135  | 4332  | 1.42 | 0.50 | 0.39 | 1.42 |
| YER074W   | RPS24A | 8461  | 5974  | 1.42 | 0.50 | 0.39 | 1.42 |
| YNL023C   | FAP1   | 3701  | 2613  | 1.42 | 0.50 | 0.39 | 1.42 |
| YBR084W   | MIS1   | 9784  | 6909  | 1.42 | 0.50 | 0.39 | 1.42 |
| YIL012W   |        | 715   | 505   | 1.42 | 0.50 | 0.39 | 1.42 |
| YGL201C   | MCM6   | 5053  | 3569  | 1.42 | 0.50 | 0.39 | 1.41 |
| YOR270C   | VPH1   | 5863  | 4144  | 1.41 | 0.50 | 0.39 | 1.41 |

|         |        |       |       |      |      |      |      |
|---------|--------|-------|-------|------|------|------|------|
| YNL316C | PHA2   | 570   | 403   | 1.41 | 0.50 | 0.39 | 1.41 |
| YBL071C |        | 4733  | 3346  | 1.41 | 0.50 | 0.39 | 1.41 |
| YGL060W |        | 2129  | 1505  | 1.41 | 0.50 | 0.39 | 1.41 |
| YBL081W |        | 3407  | 2409  | 1.41 | 0.50 | 0.39 | 1.41 |
| YOR264W |        | 8817  | 6238  | 1.41 | 0.50 | 0.39 | 1.41 |
| YER169W | RPH1   | 2712  | 1920  | 1.41 | 0.50 | 0.39 | 1.40 |
| YGR081C |        | 14801 | 10482 | 1.41 | 0.50 | 0.39 | 1.40 |
| YML064C | TEM1   | 10238 | 7251  | 1.41 | 0.50 | 0.39 | 1.40 |
| YGR067C |        | 1687  | 1195  | 1.41 | 0.50 | 0.39 | 1.40 |
| YGR251W |        | 6848  | 4851  | 1.41 | 0.50 | 0.38 | 1.40 |
| YOR162C | YRR1   | 3505  | 2484  | 1.41 | 0.50 | 0.38 | 1.40 |
| YDR014W |        | 1762  | 1249  | 1.41 | 0.50 | 0.38 | 1.40 |
| YCL049C |        | 932   | 661   | 1.41 | 0.50 | 0.38 | 1.40 |
| YPL217C | BMS1   | 6668  | 4728  | 1.41 | 0.50 | 0.38 | 1.40 |
| YGL016W | KAP122 | 1336  | 947   | 1.41 | 0.50 | 0.38 | 1.40 |
| YDR349C | YPS7   | 1206  | 855   | 1.41 | 0.50 | 0.38 | 1.39 |
| YER138C |        | 19636 | 13927 | 1.41 | 0.50 | 0.38 | 1.39 |
| YHL007C | STE20  | 6678  | 4740  | 1.41 | 0.49 | 0.38 | 1.39 |
| YDR010C |        | 2355  | 1672  | 1.41 | 0.49 | 0.38 | 1.39 |
| YLR084C | RAX2   | 975   | 692   | 1.41 | 0.49 | 0.38 | 1.39 |
| YMR147W |        | 2744  | 1948  | 1.41 | 0.49 | 0.38 | 1.39 |
| YDR395W | SXM1   | 13441 | 9543  | 1.41 | 0.49 | 0.38 | 1.39 |
| YLR353W | BUD8   | 1815  | 1289  | 1.41 | 0.49 | 0.38 | 1.39 |
| YMR101C | SRT1   | 514   | 365   | 1.41 | 0.49 | 0.38 | 1.39 |
| YOR341W | RPA190 | 10444 | 7418  | 1.41 | 0.49 | 0.38 | 1.39 |
| YBR049C | REB1   | 1464  | 1040  | 1.41 | 0.49 | 0.38 | 1.39 |
| YGL046W |        | 859   | 610   | 1.41 | 0.49 | 0.38 | 1.38 |
| YHR046C |        | 645   | 459   | 1.41 | 0.49 | 0.38 | 1.38 |
| YAL058W | CNE1   | 1932  | 1375  | 1.40 | 0.49 | 0.38 | 1.37 |
| YLR090W | XDJ1   | 3582  | 2550  | 1.40 | 0.49 | 0.38 | 1.37 |
| YKL118W |        | 822   | 585   | 1.40 | 0.49 | 0.38 | 1.37 |
| YNL184C |        | 1722  | 1227  | 1.40 | 0.49 | 0.38 | 1.37 |
| YLR307W | CDA1   | 837   | 596   | 1.40 | 0.49 | 0.38 | 1.37 |
| YDR527W |        | 5184  | 3693  | 1.40 | 0.49 | 0.38 | 1.37 |
| YKL009W | MRT4   | 13582 | 9677  | 1.40 | 0.49 | 0.38 | 1.37 |
| YMR006C | PLB2   | 1798  | 1281  | 1.40 | 0.49 | 0.38 | 1.37 |

|         |        |       |       |      |      |      |      |
|---------|--------|-------|-------|------|------|------|------|
| YDR439W | LRS4   | 1274  | 908   | 1.40 | 0.49 | 0.38 | 1.37 |
| YPL081W | RPS9A  | 14943 | 10650 | 1.40 | 0.49 | 0.38 | 1.37 |
| YDR496C |        | 11969 | 8533  | 1.40 | 0.49 | 0.38 | 1.37 |
| YDL019C |        | 2458  | 1753  | 1.40 | 0.49 | 0.38 | 1.36 |
| YOL080C |        | 13895 | 9913  | 1.40 | 0.49 | 0.37 | 1.36 |
| YLR297W |        | 3882  | 2770  | 1.40 | 0.49 | 0.37 | 1.36 |
| YPR070W | MED1   | 5501  | 3925  | 1.40 | 0.49 | 0.37 | 1.36 |
| YLL006W | MMM1   | 1781  | 1271  | 1.40 | 0.49 | 0.37 | 1.36 |
| YIRO41W |        | 446   | 318   | 1.40 | 0.49 | 0.37 | 1.36 |
| YLL007C |        | 2005  | 1431  | 1.40 | 0.49 | 0.37 | 1.36 |
| YKLO55C | OAR1   | 1508  | 1076  | 1.40 | 0.49 | 0.37 | 1.36 |
| YLR048W | RPS0B  | 18720 | 13361 | 1.40 | 0.49 | 0.37 | 1.36 |
| YGR165W |        | 6119  | 4368  | 1.40 | 0.49 | 0.37 | 1.36 |
| YOL028C | YAP7   | 2271  | 1621  | 1.40 | 0.49 | 0.37 | 1.36 |
| YMR058W | FET3   | 3187  | 2275  | 1.40 | 0.49 | 0.37 | 1.36 |
| YHR213W |        | 797   | 569   | 1.40 | 0.49 | 0.37 | 1.36 |
| YBL019W | APN2   | 1560  | 1114  | 1.40 | 0.49 | 0.37 | 1.36 |
| YBR145W | ADH5   | 6973  | 4981  | 1.40 | 0.49 | 0.37 | 1.36 |
| YKR009C | FOX2   | 529   | 378   | 1.40 | 0.49 | 0.37 | 1.35 |
| YDL228C |        | 16112 | 11512 | 1.40 | 0.49 | 0.37 | 1.35 |
| YJL047C | RTT101 | 2716  | 1941  | 1.40 | 0.48 | 0.37 | 1.35 |
| YCL036W |        | 10656 | 7617  | 1.40 | 0.48 | 0.37 | 1.35 |
| YDL152W |        | 2339  | 1672  | 1.40 | 0.48 | 0.37 | 1.35 |
| YLL047W |        | 541   | 387   | 1.40 | 0.48 | 0.37 | 1.35 |
| YPR122W | AXL1   | 2768  | 1979  | 1.40 | 0.48 | 0.37 | 1.35 |
| YJR097W |        | 4176  | 2986  | 1.40 | 0.48 | 0.37 | 1.35 |
| YDL049C | KNH1   | 912   | 652   | 1.40 | 0.48 | 0.37 | 1.35 |
| YMR204C |        | 934   | 668   | 1.40 | 0.48 | 0.37 | 1.35 |
| YKRO05C |        | 503   | 360   | 1.40 | 0.48 | 0.37 | 1.35 |
| YOR048C | RAT1   | 503   | 360   | 1.40 | 0.48 | 0.37 | 1.35 |
| YNL014W |        | 1955  | 1399  | 1.40 | 0.48 | 0.37 | 1.35 |
| YDR420W | HKR1   | 1718  | 1230  | 1.40 | 0.48 | 0.37 | 1.35 |
| YJR098C |        | 1219  | 873   | 1.40 | 0.48 | 0.37 | 1.34 |
| YOR074C | CDC21  | 1543  | 1105  | 1.40 | 0.48 | 0.37 | 1.34 |
| YFR016C |        | 1419  | 1016  | 1.40 | 0.48 | 0.37 | 1.34 |
| YLR447C | VMA6   | 10180 | 7290  | 1.40 | 0.48 | 0.37 | 1.34 |

|           |       |       |      |      |      |      |      |
|-----------|-------|-------|------|------|------|------|------|
| YLR425W   | TUS1  | 1173  | 840  | 1.40 | 0.48 | 0.37 | 1.34 |
| YLR131C   | ACE2  | 7295  | 5225 | 1.40 | 0.48 | 0.37 | 1.34 |
| YGR003W   |       | 3794  | 2718 | 1.40 | 0.48 | 0.37 | 1.34 |
| YFLO27C   |       | 5340  | 3827 | 1.40 | 0.48 | 0.37 | 1.34 |
| YKR098C   | UBP11 | 2458  | 1762 | 1.39 | 0.48 | 0.37 | 1.34 |
| YOL069W   | NUF2  | 5274  | 3782 | 1.39 | 0.48 | 0.37 | 1.34 |
| YPR160W   | GPH1  | 1326  | 951  | 1.39 | 0.48 | 0.37 | 1.34 |
| YBR133C   | HSL7  | 6607  | 4739 | 1.39 | 0.48 | 0.37 | 1.33 |
| YKL125W   | RRN3  | 7560  | 5423 | 1.39 | 0.48 | 0.37 | 1.33 |
| YML099C   | ARG81 | 2988  | 2145 | 1.39 | 0.48 | 0.37 | 1.33 |
| YLR311C   |       | 880   | 632  | 1.39 | 0.48 | 0.37 | 1.33 |
| YIL159W   | BNR1  | 4029  | 2893 | 1.39 | 0.48 | 0.37 | 1.33 |
| YBL112C   |       | 13846 | 9945 | 1.39 | 0.48 | 0.36 | 1.33 |
| YOR296W   |       | 1899  | 1364 | 1.39 | 0.48 | 0.36 | 1.33 |
| YMR122C   |       | 2008  | 1443 | 1.39 | 0.48 | 0.36 | 1.33 |
| YKL085W   | MDH1  | 6737  | 4841 | 1.39 | 0.48 | 0.36 | 1.32 |
| YOR282W   |       | 5747  | 4130 | 1.39 | 0.48 | 0.36 | 1.32 |
| YDR096W   | GIS1  | 3579  | 2572 | 1.39 | 0.48 | 0.36 | 1.32 |
| YGR243W   |       | 1561  | 1122 | 1.39 | 0.48 | 0.36 | 1.32 |
| YGR017W   |       | 11531 | 8290 | 1.39 | 0.48 | 0.36 | 1.32 |
| YFLO49W   |       | 4536  | 3261 | 1.39 | 0.48 | 0.36 | 1.32 |
| YML111W   | BUL2  | 2077  | 1493 | 1.39 | 0.48 | 0.36 | 1.32 |
| YHL029C   |       | 9118  | 6556 | 1.39 | 0.48 | 0.36 | 1.32 |
| YER167W   | BCK2  | 1524  | 1096 | 1.39 | 0.48 | 0.36 | 1.32 |
| YOL106W   |       | 5701  | 4099 | 1.39 | 0.48 | 0.36 | 1.32 |
| YFLO33C   | RIM15 | 3717  | 2673 | 1.39 | 0.48 | 0.36 | 1.32 |
| YIL015W   | BAR1  | 816   | 587  | 1.39 | 0.48 | 0.36 | 1.32 |
| YDR021W   | FAL1  | 2941  | 2115 | 1.39 | 0.48 | 0.36 | 1.32 |
| YNL102W   | POL1  | 2452  | 1764 | 1.39 | 0.48 | 0.36 | 1.32 |
| YPL014W   |       | 901   | 648  | 1.39 | 0.48 | 0.36 | 1.32 |
| YNR029C   |       | 5746  | 4134 | 1.39 | 0.47 | 0.36 | 1.32 |
| YMR316C-B |       | 595   | 428  | 1.39 | 0.47 | 0.36 | 1.32 |
| YDR360W   |       | 942   | 678  | 1.39 | 0.47 | 0.36 | 1.32 |
| YGR139W   |       | 514   | 370  | 1.39 | 0.47 | 0.36 | 1.32 |
| YHR187W   | IKI1  | 436   | 314  | 1.39 | 0.47 | 0.36 | 1.31 |
| YPL072W   | UBP16 | 5959  | 4294 | 1.39 | 0.47 | 0.36 | 1.31 |

|           |        |       |       |      |      |      |      |
|-----------|--------|-------|-------|------|------|------|------|
| YNL057W   |        | 8510  | 6134  | 1.39 | 0.47 | 0.36 | 1.31 |
| YDR114C   |        | 2250  | 1622  | 1.39 | 0.47 | 0.36 | 1.31 |
| YIL079C   |        | 6700  | 4830  | 1.39 | 0.47 | 0.36 | 1.31 |
| YNL139C   | RLR1   | 3822  | 2756  | 1.39 | 0.47 | 0.36 | 1.31 |
| YDR365C   |        | 12988 | 9369  | 1.39 | 0.47 | 0.36 | 1.30 |
| YLR287C-A | RPS30A | 19203 | 13853 | 1.39 | 0.47 | 0.36 | 1.30 |
| YGR107W   |        | 496   | 358   | 1.39 | 0.47 | 0.36 | 1.30 |
| YDL156W   |        | 916   | 661   | 1.39 | 0.47 | 0.36 | 1.30 |
| YMR036C   | MIH1   | 3075  | 2219  | 1.39 | 0.47 | 0.36 | 1.30 |
| YDR110W   | FOB1   | 7452  | 5380  | 1.39 | 0.47 | 0.36 | 1.30 |
| YMR105C   | PGM2   | 4615  | 3333  | 1.38 | 0.47 | 0.36 | 1.30 |
| YDR543C   |        | 436   | 315   | 1.38 | 0.47 | 0.36 | 1.30 |
| YHR033W   |        | 674   | 487   | 1.38 | 0.47 | 0.36 | 1.30 |
| YHR151C   |        | 1180  | 853   | 1.38 | 0.47 | 0.36 | 1.29 |
| YPR148C   |        | 6637  | 4800  | 1.38 | 0.47 | 0.36 | 1.29 |
| YKL033W   |        | 1691  | 1223  | 1.38 | 0.47 | 0.36 | 1.29 |
| YDR431W   |        | 967   | 699   | 1.38 | 0.47 | 0.36 | 1.29 |
| YDR239C   |        | 973   | 704   | 1.38 | 0.47 | 0.35 | 1.29 |
| YML090W   |        | 619   | 448   | 1.38 | 0.47 | 0.35 | 1.29 |
| YML122C   |        | 521   | 377   | 1.38 | 0.47 | 0.35 | 1.29 |
| YNL240C   | NAR1   | 1982  | 1435  | 1.38 | 0.47 | 0.35 | 1.29 |
| YAR029W   |        | 403   | 292   | 1.38 | 0.47 | 0.35 | 1.29 |
| YMR100W   | MUB1   | 5064  | 3667  | 1.38 | 0.47 | 0.35 | 1.28 |
| YDL231C   |        | 3606  | 2612  | 1.38 | 0.47 | 0.35 | 1.28 |
| YHR076W   |        | 7777  | 5633  | 1.38 | 0.47 | 0.35 | 1.28 |
| YJL050W   | MTR4   | 4313  | 3124  | 1.38 | 0.47 | 0.35 | 1.28 |
| YIR012W   | SQT1   | 13139 | 9518  | 1.38 | 0.47 | 0.35 | 1.28 |
| YLR274W   | CDC46  | 6800  | 4926  | 1.38 | 0.47 | 0.35 | 1.28 |
| YPRO30W   | CSR2   | 1144  | 829   | 1.38 | 0.46 | 0.35 | 1.28 |
| YOR244W   | ESA1   | 12361 | 8956  | 1.38 | 0.46 | 0.35 | 1.28 |
| YLR062C   |        | 8931  | 6473  | 1.38 | 0.46 | 0.35 | 1.28 |
| YLR296W   |        | 610   | 442   | 1.38 | 0.46 | 0.35 | 1.28 |
| YLR403W   | SFP1   | 3290  | 2386  | 1.38 | 0.46 | 0.35 | 1.28 |
| YDR130C   |        | 3301  | 2394  | 1.38 | 0.46 | 0.35 | 1.28 |
| YOL120C   | RPL18A | 31750 | 23025 | 1.38 | 0.46 | 0.35 | 1.28 |
| YOR056C   |        | 8380  | 6078  | 1.38 | 0.46 | 0.35 | 1.28 |

|          |        |       |       |      |      |      |      |
|----------|--------|-------|-------|------|------|------|------|
| YDL001W  |        | 1941  | 1408  | 1.38 | 0.46 | 0.35 | 1.28 |
| YGL120C  | PRP43  | 5035  | 3652  | 1.38 | 0.46 | 0.35 | 1.28 |
| YER115C  | SPR6   | 11821 | 8578  | 1.38 | 0.46 | 0.35 | 1.27 |
| YKL152C  | GPM1   | 8956  | 6499  | 1.38 | 0.46 | 0.35 | 1.27 |
| YAR015W  | ADE1   | 5247  | 3808  | 1.38 | 0.46 | 0.35 | 1.27 |
| YDR374C  |        | 353   | 256   | 1.38 | 0.46 | 0.35 | 1.27 |
| YER110C  | KAP123 | 12376 | 8984  | 1.38 | 0.46 | 0.35 | 1.27 |
| YER123W  | YCK3   | 7430  | 5394  | 1.38 | 0.46 | 0.35 | 1.27 |
| YER171W  | RAD3   | 3643  | 2645  | 1.38 | 0.46 | 0.35 | 1.27 |
| YNR065C  |        | 2946  | 2139  | 1.38 | 0.46 | 0.35 | 1.27 |
| YDR285W  | ZIP1   | 373   | 271   | 1.38 | 0.46 | 0.35 | 1.27 |
| YCL002C  |        | 1906  | 1384  | 1.38 | 0.46 | 0.35 | 1.27 |
| YPL097W  | MSY1   | 3686  | 2677  | 1.38 | 0.46 | 0.35 | 1.27 |
| YDR176W  | NGG1   | 1167  | 848   | 1.38 | 0.46 | 0.35 | 1.27 |
| YGL082W  |        | 1569  | 1140  | 1.38 | 0.46 | 0.35 | 1.27 |
| YMR095C  | SNO1   | 1003  | 729   | 1.38 | 0.46 | 0.35 | 1.27 |
| YDR437W  |        | 1813  | 1317  | 1.38 | 0.46 | 0.35 | 1.27 |
| YBR224W  |        | 618   | 449   | 1.38 | 0.46 | 0.35 | 1.27 |
| YJL195C  |        | 2142  | 1557  | 1.38 | 0.46 | 0.35 | 1.27 |
| YOR290C  | SNF2   | 860   | 625   | 1.38 | 0.46 | 0.35 | 1.26 |
| YNL017C  |        | 684   | 497   | 1.38 | 0.46 | 0.35 | 1.26 |
| YPR120C  | CLB5   | 6020  | 4378  | 1.38 | 0.46 | 0.35 | 1.26 |
| YHR056C  |        | 4070  | 2961  | 1.37 | 0.46 | 0.35 | 1.26 |
| YHR109W  |        | 26756 | 19467 | 1.37 | 0.46 | 0.35 | 1.26 |
| YIL061C  | SNP1   | 1579  | 1149  | 1.37 | 0.46 | 0.35 | 1.26 |
| YDR523C  | SPS1   | 809   | 589   | 1.37 | 0.46 | 0.35 | 1.26 |
| YLR096W  | KIN2   | 1740  | 1267  | 1.37 | 0.46 | 0.35 | 1.26 |
| YDR277C  | MTH1   | 893   | 650   | 1.37 | 0.46 | 0.35 | 1.26 |
| YMR288W  |        | 2759  | 2009  | 1.37 | 0.46 | 0.35 | 1.25 |
| YHL035C  |        | 3475  | 2531  | 1.37 | 0.46 | 0.34 | 1.25 |
| YGR069W  |        | 3191  | 2324  | 1.37 | 0.46 | 0.34 | 1.25 |
| YGR143W  | SKN1   | 2934  | 2137  | 1.37 | 0.46 | 0.34 | 1.25 |
| YLR441C  | RPS1A  | 24722 | 18016 | 1.37 | 0.46 | 0.34 | 1.25 |
| YCR097WA |        | 379   | 276   | 1.37 | 0.46 | 0.34 | 1.25 |
| YMR117C  | SPC24  | 1833  | 1337  | 1.37 | 0.46 | 0.34 | 1.25 |
| YLR032W  | RAD5   | 3671  | 2677  | 1.37 | 0.46 | 0.34 | 1.25 |



|           |        |       |       |      |      |      |      |
|-----------|--------|-------|-------|------|------|------|------|
| YOR307C   | SLY41  | 8682  | 6333  | 1.37 | 0.46 | 0.34 | 1.25 |
| YEL014C   |        | 496   | 362   | 1.37 | 0.46 | 0.34 | 1.25 |
| YPR124W   | CTR1   | 32052 | 23382 | 1.37 | 0.46 | 0.34 | 1.25 |
| YPRO08W   |        | 4904  | 3578  | 1.37 | 0.45 | 0.34 | 1.24 |
| YGR249W   | MGA1   | 562   | 410   | 1.37 | 0.45 | 0.34 | 1.24 |
| YCRO85W   |        | 675   | 493   | 1.37 | 0.45 | 0.34 | 1.24 |
| YMR017W   | SPO20  | 726   | 530   | 1.37 | 0.45 | 0.34 | 1.24 |
| YOR144C   | EFD1   | 2567  | 1876  | 1.37 | 0.45 | 0.34 | 1.24 |
| YJR071W   |        | 7191  | 5255  | 1.37 | 0.45 | 0.34 | 1.24 |
| YML024W   | RPS17A | 11016 | 8051  | 1.37 | 0.45 | 0.34 | 1.24 |
| YDL075W   | RPL31A | 14200 | 10385 | 1.37 | 0.45 | 0.34 | 1.23 |
| YDR030C   | RAD28  | 682   | 499   | 1.37 | 0.45 | 0.34 | 1.23 |
| YDR466W   |        | 435   | 318   | 1.37 | 0.45 | 0.34 | 1.23 |
| YER109C   | FLO8   | 1923  | 1407  | 1.37 | 0.45 | 0.34 | 1.23 |
| YJL085W   | EXO70  | 3856  | 2821  | 1.37 | 0.45 | 0.34 | 1.23 |
| YIRO26C   | YVH1   | 12413 | 9087  | 1.37 | 0.45 | 0.34 | 1.23 |
| YML091C   | RPM2   | 9630  | 7050  | 1.37 | 0.45 | 0.34 | 1.23 |
| YBR021W   | FUR4   | 1355  | 992   | 1.37 | 0.45 | 0.34 | 1.23 |
| YDR488C   | PAC11  | 2577  | 1887  | 1.37 | 0.45 | 0.34 | 1.23 |
| YAR014C   |        | 2388  | 1749  | 1.37 | 0.45 | 0.34 | 1.23 |
| YOR377W   | ATF1   | 7106  | 5207  | 1.36 | 0.45 | 0.34 | 1.22 |
| YJL071W   | ARG2   | 2824  | 2071  | 1.36 | 0.45 | 0.34 | 1.22 |
| YBL005W-B |        | 1099  | 806   | 1.36 | 0.45 | 0.34 | 1.22 |
| YNL076W   | MKS1   | 6522  | 4783  | 1.36 | 0.45 | 0.34 | 1.22 |
| YLR068W   |        | 5788  | 4245  | 1.36 | 0.45 | 0.33 | 1.22 |
| YOL102C   | TPT1   | 4957  | 3636  | 1.36 | 0.45 | 0.33 | 1.22 |
| YJR157W   |        | 476   | 349   | 1.36 | 0.45 | 0.33 | 1.22 |
| YGR051C   |        | 931   | 683   | 1.36 | 0.45 | 0.33 | 1.22 |
| YGR083C   | GCD2   | 9141  | 6709  | 1.36 | 0.45 | 0.33 | 1.21 |
| YDL105W   | QRI2   | 2036  | 1495  | 1.36 | 0.45 | 0.33 | 1.21 |
| YGR094W   | VAS1   | 15632 | 11482 | 1.36 | 0.45 | 0.33 | 1.21 |
| YPL085W   | SEC16  | 995   | 731   | 1.36 | 0.45 | 0.33 | 1.21 |
| YNL121C   | TOM70  | 8250  | 6060  | 1.36 | 0.45 | 0.33 | 1.21 |
| YLR236C   |        | 960   | 705   | 1.36 | 0.44 | 0.33 | 1.21 |
| YBR247C   | ENP1   | 34633 | 25446 | 1.36 | 0.44 | 0.33 | 1.21 |
| YLL034C   |        | 614   | 451   | 1.36 | 0.44 | 0.33 | 1.21 |

|           |       |       |       |      |      |      |      |
|-----------|-------|-------|-------|------|------|------|------|
| YOR160W   | MTR10 | 2081  | 1530  | 1.36 | 0.44 | 0.33 | 1.20 |
| YMR270C   | RRN9  | 4305  | 3166  | 1.36 | 0.44 | 0.33 | 1.20 |
| YOR124C   | UBP2  | 986   | 725   | 1.36 | 0.44 | 0.33 | 1.20 |
| YGL122C   | NAB2  | 983   | 723   | 1.36 | 0.44 | 0.33 | 1.20 |
| YDR463W   | STP1  | 3181  | 2340  | 1.36 | 0.44 | 0.33 | 1.20 |
| YJL022W   |       | 1610  | 1185  | 1.36 | 0.44 | 0.33 | 1.20 |
| YLL035W   |       | 7692  | 5662  | 1.36 | 0.44 | 0.33 | 1.20 |
| YNR012W   | URK1  | 14049 | 10342 | 1.36 | 0.44 | 0.33 | 1.20 |
| YPR144C   |       | 4468  | 3289  | 1.36 | 0.44 | 0.33 | 1.20 |
| YFRO24C-A |       | 1256  | 925   | 1.36 | 0.44 | 0.33 | 1.20 |
| YNL324W   |       | 617   | 454   | 1.36 | 0.44 | 0.33 | 1.20 |
| YPRO95C   | SYT1  | 595   | 438   | 1.36 | 0.44 | 0.33 | 1.20 |
| YBR012W-B |       | 394   | 290   | 1.36 | 0.44 | 0.33 | 1.20 |
| YLR305C   | STT4  | 4130  | 3043  | 1.36 | 0.44 | 0.33 | 1.19 |
| YGR021W   |       | 12562 | 9256  | 1.36 | 0.44 | 0.33 | 1.19 |
| YDL180W   |       | 1465  | 1080  | 1.36 | 0.44 | 0.33 | 1.19 |
| YDRO42C   |       | 876   | 646   | 1.36 | 0.44 | 0.33 | 1.19 |
| YGR061C   | ADE6  | 7360  | 5426  | 1.36 | 0.44 | 0.33 | 1.19 |
| YER016W   | BIM1  | 2429  | 1791  | 1.36 | 0.44 | 0.33 | 1.19 |
| YLR320W   |       | 2718  | 2004  | 1.36 | 0.44 | 0.33 | 1.19 |
| YOR371C   |       | 2176  | 1605  | 1.36 | 0.44 | 0.33 | 1.19 |
| YLL005C   |       | 2319  | 1710  | 1.36 | 0.44 | 0.33 | 1.19 |
| YLR400W   |       | 946   | 698   | 1.36 | 0.44 | 0.33 | 1.19 |
| YIR002C   | MPH1  | 4730  | 3492  | 1.35 | 0.44 | 0.33 | 1.18 |
| YHR169W   | DBP8  | 3191  | 2356  | 1.35 | 0.44 | 0.33 | 1.18 |
| YMR206W   |       | 570   | 421   | 1.35 | 0.44 | 0.32 | 1.18 |
| YDR219C   |       | 1133  | 837   | 1.35 | 0.44 | 0.32 | 1.18 |
| YJL200C   |       | 18016 | 13307 | 1.35 | 0.44 | 0.32 | 1.18 |
| YDRO28C   | REG1  | 1807  | 1335  | 1.35 | 0.44 | 0.32 | 1.18 |
| YJL043W   |       | 686   | 507   | 1.35 | 0.44 | 0.32 | 1.18 |
| YMR046C   |       | 33588 | 24816 | 1.35 | 0.44 | 0.32 | 1.18 |
| YBR186W   | PCH2  | 1202  | 888   | 1.35 | 0.44 | 0.32 | 1.18 |
| YOL152W   | FRE7  | 7073  | 5227  | 1.35 | 0.44 | 0.32 | 1.18 |
| YIR010W   |       | 5870  | 4338  | 1.35 | 0.44 | 0.32 | 1.18 |
| YBL017C   | PEP1  | 798   | 590   | 1.35 | 0.44 | 0.32 | 1.18 |
| YML005W   |       | 6980  | 5159  | 1.35 | 0.44 | 0.32 | 1.18 |

|         |        |       |       |      |      |      |      |
|---------|--------|-------|-------|------|------|------|------|
| YER140W |        | 6815  | 5039  | 1.35 | 0.44 | 0.32 | 1.17 |
| YDR128W |        | 2878  | 2128  | 1.35 | 0.44 | 0.32 | 1.17 |
| YBR065C | ECM2   | 5003  | 3702  | 1.35 | 0.43 | 0.32 | 1.17 |
| YNL016W | PUB1   | 6262  | 4634  | 1.35 | 0.43 | 0.32 | 1.17 |
| YDR389W | SAC7   | 9486  | 7020  | 1.35 | 0.43 | 0.32 | 1.17 |
| YDR194C | MSS116 | 2681  | 1984  | 1.35 | 0.43 | 0.32 | 1.17 |
| YDR393W | SHE9   | 8033  | 5945  | 1.35 | 0.43 | 0.32 | 1.17 |
| YJL125C | GCD14  | 5407  | 4002  | 1.35 | 0.43 | 0.32 | 1.17 |
| YER122C | GLO3   | 17713 | 13113 | 1.35 | 0.43 | 0.32 | 1.17 |
| YHR058C | MED6   | 5154  | 3816  | 1.35 | 0.43 | 0.32 | 1.17 |
| YKR082W | NUP133 | 3426  | 2537  | 1.35 | 0.43 | 0.32 | 1.17 |
| YLR288C | MEC3   | 3323  | 2462  | 1.35 | 0.43 | 0.32 | 1.16 |
| YOR140W | SFL1   | 2659  | 1970  | 1.35 | 0.43 | 0.32 | 1.16 |
| YMR228W | MTF1   | 1701  | 1260  | 1.35 | 0.43 | 0.32 | 1.16 |
| YHL019C | APM2   | 3805  | 2819  | 1.35 | 0.43 | 0.32 | 1.16 |
| YDL103C | QRI1   | 1057  | 783   | 1.35 | 0.43 | 0.32 | 1.16 |
| YOLO61W | PRS5   | 13307 | 9861  | 1.35 | 0.43 | 0.32 | 1.16 |
| YCR033W |        | 1147  | 850   | 1.35 | 0.43 | 0.32 | 1.16 |
| YBL023C | MCM2   | 2401  | 1780  | 1.35 | 0.43 | 0.32 | 1.16 |
| YGR022C |        | 600   | 445   | 1.35 | 0.43 | 0.32 | 1.16 |
| YIL158W |        | 10772 | 7988  | 1.35 | 0.43 | 0.32 | 1.16 |
| YOR072W |        | 597   | 443   | 1.35 | 0.43 | 0.32 | 1.16 |
| YMR129W | POM152 | 2772  | 2056  | 1.35 | 0.43 | 0.32 | 1.16 |
| YKR060W |        | 3355  | 2488  | 1.35 | 0.43 | 0.32 | 1.16 |
| YBR238C |        | 2957  | 2193  | 1.35 | 0.43 | 0.32 | 1.16 |
| YMR050C |        | 8068  | 5984  | 1.35 | 0.43 | 0.32 | 1.16 |
| YKR021W |        | 2641  | 1959  | 1.35 | 0.43 | 0.32 | 1.16 |
| YDR138W | HPR1   | 4366  | 3239  | 1.35 | 0.43 | 0.32 | 1.16 |
| YDR172W | SUP35  | 480   | 356   | 1.35 | 0.43 | 0.32 | 1.16 |
| YPR010C | RPA135 | 9072  | 6733  | 1.35 | 0.43 | 0.32 | 1.16 |
| YJL028W |        | 1207  | 896   | 1.35 | 0.43 | 0.32 | 1.15 |
| YOR314W |        | 1206  | 895   | 1.35 | 0.43 | 0.32 | 1.15 |
| YGL032C | AGA2   | 548   | 407   | 1.35 | 0.43 | 0.32 | 1.15 |
| YKR024C | DBP7   | 1709  | 1269  | 1.35 | 0.43 | 0.32 | 1.15 |
| YLR304C | ACO1   | 22801 | 16933 | 1.35 | 0.43 | 0.32 | 1.15 |
| YDL062W |        | 5951  | 4420  | 1.35 | 0.43 | 0.32 | 1.15 |

|         |        |       |      |      |      |      |      |
|---------|--------|-------|------|------|------|------|------|
| YLL003W | SFI1   | 2428  | 1804 | 1.35 | 0.43 | 0.32 | 1.15 |
| YOR182C | RPS30B | 12131 | 9018 | 1.35 | 0.43 | 0.32 | 1.15 |
| YLR072W |        | 824   | 613  | 1.34 | 0.43 | 0.31 | 1.15 |
| YMR076C | PDS5   | 1799  | 1338 | 1.34 | 0.43 | 0.31 | 1.14 |
| YOR029W |        | 488   | 363  | 1.34 | 0.43 | 0.31 | 1.14 |
| YDR052C | DBF4   | 4007  | 2982 | 1.34 | 0.43 | 0.31 | 1.14 |
| YOR391C |        | 392   | 292  | 1.34 | 0.43 | 0.31 | 1.14 |
| YBR155W | CNS1   | 6137  | 4568 | 1.34 | 0.43 | 0.31 | 1.14 |
| YCRX19W |        | 848   | 631  | 1.34 | 0.43 | 0.31 | 1.14 |
| YKL006W | RPL14A | 1381  | 1028 | 1.34 | 0.43 | 0.31 | 1.14 |
| YNL166C | BNI5   | 11669 | 8689 | 1.34 | 0.43 | 0.31 | 1.14 |
| YLL008W | DRS1   | 11655 | 8679 | 1.34 | 0.43 | 0.31 | 1.14 |
| YBR085W | AAC3   | 2171  | 1617 | 1.34 | 0.42 | 0.31 | 1.14 |
| YER125W | RSP5   | 12690 | 9453 | 1.34 | 0.42 | 0.31 | 1.14 |
| YNL021W | HDA1   | 3202  | 2385 | 1.34 | 0.42 | 0.31 | 1.14 |
| YGR281W | YOR1   | 5433  | 4047 | 1.34 | 0.42 | 0.31 | 1.14 |
| YPRO27C |        | 1982  | 1477 | 1.34 | 0.42 | 0.31 | 1.13 |
| YNL082W | PMS1   | 5046  | 3760 | 1.34 | 0.42 | 0.31 | 1.13 |
| YPL027W |        | 637   | 475  | 1.34 | 0.42 | 0.31 | 1.13 |
| YOL121C | RPS19A | 12580 | 9381 | 1.34 | 0.42 | 0.31 | 1.13 |
| YOR346W | REV1   | 4558  | 3399 | 1.34 | 0.42 | 0.31 | 1.13 |
| YGL216W | KIP3   | 5316  | 3965 | 1.34 | 0.42 | 0.31 | 1.13 |
| YGL169W | SUA5   | 11184 | 8341 | 1.34 | 0.42 | 0.31 | 1.13 |
| YBR064W |        | 761   | 568  | 1.34 | 0.42 | 0.31 | 1.13 |
| YGR099W | TEL2   | 2540  | 1895 | 1.34 | 0.42 | 0.31 | 1.13 |
| YDL085W |        | 1215  | 907  | 1.34 | 0.42 | 0.31 | 1.13 |
| YDR355C |        | 1537  | 1147 | 1.34 | 0.42 | 0.31 | 1.13 |
| YKL037W |        | 1196  | 893  | 1.34 | 0.42 | 0.31 | 1.12 |
| YEL025C |        | 2391  | 1785 | 1.34 | 0.42 | 0.31 | 1.12 |
| YJR032W | CPR7   | 7198  | 5374 | 1.34 | 0.42 | 0.31 | 1.12 |
| YGR296W | YRF1-3 | 1254  | 936  | 1.34 | 0.42 | 0.31 | 1.12 |
| YJR082C |        | 3818  | 2852 | 1.34 | 0.42 | 0.31 | 1.12 |
| YPRO31W |        | 2312  | 1727 | 1.34 | 0.42 | 0.31 | 1.12 |
| YIRO20C |        | 950   | 710  | 1.34 | 0.42 | 0.31 | 1.12 |
| YJL042W | MHP1   | 2653  | 1983 | 1.34 | 0.42 | 0.31 | 1.12 |
| YDR324C |        | 6432  | 4807 | 1.34 | 0.42 | 0.31 | 1.12 |

|           |        |       |       |      |      |      |      |
|-----------|--------|-------|-------|------|------|------|------|
| YIL100W   |        | 440   | 329   | 1.34 | 0.42 | 0.31 | 1.12 |
| YPL160W   | CDC60  | 8671  | 6482  | 1.34 | 0.42 | 0.31 | 1.12 |
| YCRO47C   |        | 6595  | 4930  | 1.34 | 0.42 | 0.31 | 1.12 |
| YOR170W   |        | 2170  | 1623  | 1.34 | 0.42 | 0.31 | 1.11 |
| YNL164C   |        | 7023  | 5255  | 1.34 | 0.42 | 0.31 | 1.11 |
| YDR379W   | RGA2   | 4621  | 3459  | 1.34 | 0.42 | 0.31 | 1.11 |
| YBL079W   | NUP170 | 578   | 433   | 1.34 | 0.42 | 0.30 | 1.11 |
| YOR359W   |        | 5452  | 4084  | 1.33 | 0.42 | 0.30 | 1.11 |
| YHR158C   | KEL1   | 2429  | 1820  | 1.33 | 0.42 | 0.30 | 1.11 |
| YLR152C   |        | 3604  | 2700  | 1.33 | 0.42 | 0.30 | 1.11 |
| YELO39C   | CYC7   | 1118  | 838   | 1.33 | 0.42 | 0.30 | 1.10 |
| YDR441C   | APT2   | 2228  | 1670  | 1.33 | 0.42 | 0.30 | 1.10 |
| YLL021W   | SPA2   | 5449  | 4084  | 1.33 | 0.42 | 0.30 | 1.10 |
| YPL103C   |        | 3053  | 2288  | 1.33 | 0.42 | 0.30 | 1.10 |
| YKL095W   | YJU2   | 1538  | 1153  | 1.33 | 0.42 | 0.30 | 1.10 |
| YNL248C   | RPA49  | 13635 | 10226 | 1.33 | 0.42 | 0.30 | 1.10 |
| YJL025W   | RRN7   | 3554  | 2666  | 1.33 | 0.41 | 0.30 | 1.10 |
| YER032W   | FIR1   | 3057  | 2293  | 1.33 | 0.41 | 0.30 | 1.10 |
| YAL064W   |        | 643   | 482   | 1.33 | 0.41 | 0.30 | 1.10 |
| YEL023C   |        | 1337  | 1003  | 1.33 | 0.41 | 0.30 | 1.10 |
| YOR034C   | AKR2   | 4640  | 3481  | 1.33 | 0.41 | 0.30 | 1.10 |
| YIL165C   |        | 1850  | 1388  | 1.33 | 0.41 | 0.30 | 1.10 |
| YDL031W   | DBP10  | 3213  | 2411  | 1.33 | 0.41 | 0.30 | 1.10 |
| YMR280C   | CAT8   | 525   | 394   | 1.33 | 0.41 | 0.30 | 1.10 |
| YMR094W   | CTF13  | 1713  | 1286  | 1.33 | 0.41 | 0.30 | 1.10 |
| YGR119C   | NUP57  | 6518  | 4894  | 1.33 | 0.41 | 0.30 | 1.09 |
| YDR359C   |        | 5787  | 4346  | 1.33 | 0.41 | 0.30 | 1.09 |
| YNL242W   |        | 1103  | 829   | 1.33 | 0.41 | 0.30 | 1.09 |
| YLR223C   | IFH1   | 5308  | 3989  | 1.33 | 0.41 | 0.30 | 1.09 |
| YMR019W   | STB4   | 3703  | 2783  | 1.33 | 0.41 | 0.30 | 1.09 |
| YCL037C   | SRO9   | 9660  | 7260  | 1.33 | 0.41 | 0.30 | 1.09 |
| YFL067W   |        | 12089 | 9087  | 1.33 | 0.41 | 0.30 | 1.09 |
| YOR312C   | RPL20B | 11733 | 8822  | 1.33 | 0.41 | 0.30 | 1.09 |
| YLR122C   |        | 633   | 476   | 1.33 | 0.41 | 0.30 | 1.09 |
| YOL141W   |        | 972   | 731   | 1.33 | 0.41 | 0.30 | 1.09 |
| YFRO31C-A | RPL2A  | 15729 | 11834 | 1.33 | 0.41 | 0.30 | 1.08 |

|         |       |       |       |      |      |      |      |
|---------|-------|-------|-------|------|------|------|------|
| YPR123C |       | 9107  | 6854  | 1.33 | 0.41 | 0.30 | 1.08 |
| YPR092W |       | 2269  | 1708  | 1.33 | 0.41 | 0.30 | 1.08 |
| YDR112W |       | 1228  | 924   | 1.33 | 0.41 | 0.30 | 1.08 |
| YHR006W | STP2  | 6118  | 4606  | 1.33 | 0.41 | 0.30 | 1.08 |
| YDR108W | GSG1  | 6317  | 4757  | 1.33 | 0.41 | 0.30 | 1.08 |
| YJL197W | UBP12 | 1754  | 1321  | 1.33 | 0.41 | 0.30 | 1.08 |
| YDR191W | HST4  | 1613  | 1215  | 1.33 | 0.41 | 0.30 | 1.08 |
| YDR223W |       | 688   | 518   | 1.33 | 0.41 | 0.30 | 1.08 |
| YJL067W |       | 1873  | 1411  | 1.33 | 0.41 | 0.30 | 1.08 |
| YKL104C | GFA1  | 3699  | 2789  | 1.33 | 0.41 | 0.30 | 1.07 |
| YOR028C | CIN5  | 1457  | 1099  | 1.33 | 0.41 | 0.29 | 1.07 |
| YHR219W |       | 16273 | 12273 | 1.33 | 0.41 | 0.29 | 1.07 |
| YGR157W | CHO2  | 2778  | 2095  | 1.33 | 0.41 | 0.29 | 1.07 |
| YGR272C |       | 16674 | 12577 | 1.33 | 0.41 | 0.29 | 1.07 |
| YHR043C | DOG2  | 12984 | 9794  | 1.33 | 0.41 | 0.29 | 1.07 |
| YCRX01W |       | 1053  | 794   | 1.33 | 0.41 | 0.29 | 1.07 |
| YNR067C |       | 9110  | 6872  | 1.33 | 0.41 | 0.29 | 1.07 |
| YJR136C |       | 5751  | 4339  | 1.33 | 0.41 | 0.29 | 1.07 |
| YBL092W | RPL32 | 5919  | 4466  | 1.33 | 0.41 | 0.29 | 1.07 |
| YDR445C |       | 1429  | 1078  | 1.33 | 0.41 | 0.29 | 1.07 |
| YOR026W | BUB3  | 2369  | 1788  | 1.33 | 0.41 | 0.29 | 1.07 |
| YER099C | PRS2  | 19990 | 15088 | 1.32 | 0.41 | 0.29 | 1.07 |
| YOL004W | SIN3  | 602   | 454   | 1.32 | 0.41 | 0.29 | 1.07 |
| YML037C |       | 815   | 615   | 1.32 | 0.41 | 0.29 | 1.07 |
| YNL143C |       | 2442  | 1843  | 1.32 | 0.41 | 0.29 | 1.07 |
| YGR123C | PPT1  | 6451  | 4870  | 1.32 | 0.41 | 0.29 | 1.07 |
| YMR179W | SPT21 | 5733  | 4329  | 1.32 | 0.41 | 0.29 | 1.07 |
| YMR126C |       | 5684  | 4292  | 1.32 | 0.41 | 0.29 | 1.07 |
| YAR018C | KIN3  | 3252  | 2457  | 1.32 | 0.40 | 0.29 | 1.06 |
| YCL052C | PBN1  | 2909  | 2198  | 1.32 | 0.40 | 0.29 | 1.06 |
| YKRO63C | LAS1  | 6666  | 5037  | 1.32 | 0.40 | 0.29 | 1.06 |
| YBR292C |       | 1158  | 875   | 1.32 | 0.40 | 0.29 | 1.06 |
| YDL073W |       | 742   | 561   | 1.32 | 0.40 | 0.29 | 1.06 |
| YPL268W | PLC1  | 4558  | 3445  | 1.32 | 0.40 | 0.29 | 1.06 |
| YDR004W | RAD57 | 1754  | 1326  | 1.32 | 0.40 | 0.29 | 1.06 |
| YDR174W | HMO1  | 15363 | 11615 | 1.32 | 0.40 | 0.29 | 1.06 |

|           |        |       |       |      |      |      |      |
|-----------|--------|-------|-------|------|------|------|------|
| YHL003C   | LAG1   | 12998 | 9827  | 1.32 | 0.40 | 0.29 | 1.06 |
| YMR057C   |        | 731   | 553   | 1.32 | 0.40 | 0.29 | 1.06 |
| YPL026C   | SKS1   | 1157  | 875   | 1.32 | 0.40 | 0.29 | 1.05 |
| YJR132W   | NMD5   | 4820  | 3647  | 1.32 | 0.40 | 0.29 | 1.05 |
| YER008C   | SEC3   | 834   | 631   | 1.32 | 0.40 | 0.29 | 1.05 |
| YHL025W   | SNF6   | 10521 | 7961  | 1.32 | 0.40 | 0.29 | 1.05 |
| YGR183C   | QCR9   | 8826  | 6679  | 1.32 | 0.40 | 0.29 | 1.05 |
| YLR162W   |        | 4865  | 3682  | 1.32 | 0.40 | 0.29 | 1.05 |
| YFL008W   | SMC1   | 3748  | 2837  | 1.32 | 0.40 | 0.29 | 1.05 |
| YOR266W   | PNT1   | 2395  | 1813  | 1.32 | 0.40 | 0.29 | 1.05 |
| YNL078W   |        | 10118 | 7659  | 1.32 | 0.40 | 0.29 | 1.05 |
| YLR056W   | ERG3   | 17655 | 13367 | 1.32 | 0.40 | 0.29 | 1.05 |
| YAL035W   | FUN12  | 6242  | 4726  | 1.32 | 0.40 | 0.29 | 1.05 |
| YDR255C   |        | 581   | 440   | 1.32 | 0.40 | 0.29 | 1.05 |
| YPL135W   | ISU1   | 3666  | 2777  | 1.32 | 0.40 | 0.29 | 1.05 |
| YFL035C-B |        | 26049 | 19732 | 1.32 | 0.40 | 0.29 | 1.05 |
| YER056C   | FCY2   | 3147  | 2384  | 1.32 | 0.40 | 0.29 | 1.05 |
| YFL052W   |        | 452   | 343   | 1.32 | 0.40 | 0.29 | 1.04 |
| YGR085C   | RPL11B | 26554 | 20131 | 1.32 | 0.40 | 0.29 | 1.04 |
| YLR457C   | NBP1   | 2416  | 1832  | 1.32 | 0.40 | 0.29 | 1.04 |
| YNL247W   |        | 19958 | 15139 | 1.32 | 0.40 | 0.29 | 1.04 |
| YLR406C   | RPL31B | 995   | 755   | 1.32 | 0.40 | 0.29 | 1.04 |
| YDL101C   | DUN1   | 2422  | 1838  | 1.32 | 0.40 | 0.29 | 1.04 |
| YOR376W   |        | 362   | 275   | 1.32 | 0.40 | 0.29 | 1.04 |
| YDR307W   |        | 1049  | 796   | 1.32 | 0.40 | 0.29 | 1.04 |
| YBR267W   |        | 17014 | 12918 | 1.32 | 0.40 | 0.28 | 1.04 |
| YJL057C   | IKS1   | 4923  | 3738  | 1.32 | 0.40 | 0.28 | 1.04 |
| YPL158C   |        | 9296  | 7059  | 1.32 | 0.40 | 0.28 | 1.04 |
| YHR155W   |        | 5214  | 3960  | 1.32 | 0.40 | 0.28 | 1.03 |
| YIL161W   |        | 9237  | 7017  | 1.32 | 0.40 | 0.28 | 1.03 |
| YLR309C   | IMH1   | 3018  | 2293  | 1.32 | 0.40 | 0.28 | 1.03 |
| YMR069W   |        | 1027  | 780   | 1.32 | 0.40 | 0.28 | 1.03 |
| YGL150C   | INO80  | 2898  | 2202  | 1.32 | 0.40 | 0.28 | 1.03 |
| YIL147C   | SLN1   | 4234  | 3217  | 1.32 | 0.40 | 0.28 | 1.03 |
| YMR198W   | CIK1   | 1023  | 777   | 1.32 | 0.40 | 0.28 | 1.03 |
| YBR218C   | PYC2   | 986   | 749   | 1.32 | 0.40 | 0.28 | 1.03 |

|           |        |       |       |      |      |      |      |
|-----------|--------|-------|-------|------|------|------|------|
| YGL238W   | CSE1   | 12171 | 9249  | 1.32 | 0.40 | 0.28 | 1.03 |
| YMR116C   | ASC1   | 21549 | 16376 | 1.32 | 0.40 | 0.28 | 1.03 |
| YML078W   | CPR3   | 7941  | 6035  | 1.32 | 0.40 | 0.28 | 1.03 |
| YOR351C   | MEK1   | 772   | 587   | 1.32 | 0.40 | 0.28 | 1.03 |
| YER117W   | RPL23B | 23520 | 17875 | 1.32 | 0.40 | 0.28 | 1.03 |
| YNL054W   | VAC7   | 1595  | 1213  | 1.32 | 0.40 | 0.28 | 1.03 |
| YKR055W   | RHO4   | 1136  | 864   | 1.31 | 0.39 | 0.28 | 1.03 |
| YDR459C   |        | 2746  | 2089  | 1.31 | 0.39 | 0.28 | 1.03 |
| YDR107C   |        | 582   | 443   | 1.31 | 0.39 | 0.28 | 1.03 |
| YNL031C   | HHT2   | 26103 | 19857 | 1.31 | 0.39 | 0.28 | 1.03 |
| YOR325W   |        | 2321  | 1766  | 1.31 | 0.39 | 0.28 | 1.03 |
| YGR221C   |        | 545   | 415   | 1.31 | 0.39 | 0.28 | 1.03 |
| YLR174W   | IDP2   | 714   | 543   | 1.31 | 0.39 | 0.28 | 1.02 |
| YLR063W   |        | 3085  | 2348  | 1.31 | 0.39 | 0.28 | 1.02 |
| YKR059W   | TIF1   | 21282 | 16196 | 1.31 | 0.39 | 0.28 | 1.02 |
| YKR073C   |        | 1275  | 971   | 1.31 | 0.39 | 0.28 | 1.02 |
| YPL280W   |        | 402   | 306   | 1.31 | 0.39 | 0.28 | 1.02 |
| YCR001W   |        | 734   | 559   | 1.31 | 0.39 | 0.28 | 1.02 |
| YKR029C   |        | 3601  | 2742  | 1.31 | 0.39 | 0.28 | 1.02 |
| YDR034C   | LYS14  | 3964  | 3020  | 1.31 | 0.39 | 0.28 | 1.02 |
| YDR515W   | SLF1   | 8801  | 6706  | 1.31 | 0.39 | 0.28 | 1.02 |
| YPR014C   |        | 2157  | 1644  | 1.31 | 0.39 | 0.28 | 1.02 |
| YPR149W   | NCE102 | 45932 | 35008 | 1.31 | 0.39 | 0.28 | 1.02 |
| YKL089W   | MIF2   | 1982  | 1511  | 1.31 | 0.39 | 0.28 | 1.02 |
| YHR214C-B |        | 4379  | 3338  | 1.31 | 0.39 | 0.28 | 1.01 |
| YMR065W   | KAR5   | 3258  | 2484  | 1.31 | 0.39 | 0.28 | 1.01 |
| YDR057W   |        | 5870  | 4476  | 1.31 | 0.39 | 0.28 | 1.01 |
| YJL014W   | CCT3   | 14760 | 11255 | 1.31 | 0.39 | 0.28 | 1.01 |
| YMR097C   |        | 5162  | 3937  | 1.31 | 0.39 | 0.28 | 1.01 |
| YNR045W   | PET494 | 384   | 293   | 1.31 | 0.39 | 0.28 | 1.01 |
| YAR043C   |        | 800   | 610   | 1.31 | 0.39 | 0.28 | 1.01 |
| YDR341C   |        | 797   | 608   | 1.31 | 0.39 | 0.28 | 1.01 |
| YOR393W   | ERR1   | 1211  | 924   | 1.31 | 0.39 | 0.28 | 1.01 |
| YHR045W   |        | 956   | 729   | 1.31 | 0.39 | 0.28 | 1.01 |
| YER088C   | DOT6   | 1239  | 945   | 1.31 | 0.39 | 0.28 | 1.01 |
| YKR077W   |        | 5932  | 4526  | 1.31 | 0.39 | 0.28 | 1.01 |



|         |        |       |       |      |      |      |      |
|---------|--------|-------|-------|------|------|------|------|
| YKL116C |        | 3612  | 2756  | 1.31 | 0.39 | 0.28 | 1.01 |
| YDL205C | HEM3   | 19579 | 14942 | 1.31 | 0.39 | 0.28 | 1.01 |
| YMR171C |        | 6036  | 4607  | 1.31 | 0.39 | 0.28 | 1.01 |
| YKL057C | NUP120 | 1679  | 1282  | 1.31 | 0.39 | 0.28 | 1.01 |
| YDR435C |        | 1113  | 850   | 1.31 | 0.39 | 0.28 | 1.00 |
| YAR035W | YAT1   | 711   | 543   | 1.31 | 0.39 | 0.28 | 1.00 |
| YDR346C |        | 2316  | 1769  | 1.31 | 0.39 | 0.28 | 1.00 |
| YDR106W | ARP10  | 987   | 754   | 1.31 | 0.39 | 0.28 | 1.00 |
| YJL049W |        | 4682  | 3577  | 1.31 | 0.39 | 0.28 | 1.00 |
| YBL105C | PKC1   | 1352  | 1033  | 1.31 | 0.39 | 0.28 | 1.00 |
| YML106W | URA5   | 9664  | 7385  | 1.31 | 0.39 | 0.28 | 1.00 |
| YJR060W | CBF1   | 1951  | 1491  | 1.31 | 0.39 | 0.28 | 1.00 |
| YDR149C |        | 548   | 419   | 1.31 | 0.39 | 0.28 | 1.00 |
| YJR126C |        | 1856  | 1419  | 1.31 | 0.39 | 0.28 | 1.00 |
| YOL100W | PKH2   | 7184  | 5493  | 1.31 | 0.39 | 0.27 | 1.00 |
| YCR067C | SED4   | 2291  | 1752  | 1.31 | 0.39 | 0.27 | 1.00 |
| YPRO26W | ATH1   | 2016  | 1542  | 1.31 | 0.39 | 0.27 | 1.00 |
| YDL170W | UGA3   | 3811  | 2915  | 1.31 | 0.39 | 0.27 | 1.00 |
| YML107C |        | 1768  | 1352  | 1.31 | 0.39 | 0.27 | 1.00 |
| YMR189W | GCV2   | 599   | 458   | 1.31 | 0.39 | 0.27 | 1.00 |
| YCR072C |        | 4969  | 3801  | 1.31 | 0.39 | 0.27 | 1.00 |
| YHL011C | PRS3   | 20927 | 16008 | 1.31 | 0.39 | 0.27 | 1.00 |
| YBR115C | LYS2   | 5199  | 3977  | 1.31 | 0.39 | 0.27 | 1.00 |
| YJL129C | TRK1   | 2537  | 1941  | 1.31 | 0.39 | 0.27 | 1.00 |
| YOL067C | RTG1   | 2735  | 2093  | 1.31 | 0.39 | 0.27 | 1.00 |
| YNL118C | DCP2   | 7189  | 5501  | 1.31 | 0.39 | 0.27 | 1.00 |
| YDR485C |        | 1954  | 1495  | 1.31 | 0.39 | 0.27 | 0.99 |
| YBR011C | IPP1   | 20953 | 16035 | 1.31 | 0.39 | 0.27 | 0.99 |
| YFL036W | RPO41  | 3070  | 2350  | 1.31 | 0.39 | 0.27 | 0.99 |
| YPRO42C |        | 619   | 474   | 1.31 | 0.39 | 0.27 | 0.99 |
| YBR055C | PRP6   | 2559  | 1959  | 1.31 | 0.39 | 0.27 | 0.99 |
| YER132C | PMD1   | 4226  | 3235  | 1.31 | 0.39 | 0.27 | 0.99 |
| YDL112W | TRM3   | 3106  | 2378  | 1.31 | 0.39 | 0.27 | 0.99 |
| YHR183W | GND1   | 3398  | 2602  | 1.31 | 0.39 | 0.27 | 0.99 |
| YPL175W | SPT14  | 3513  | 2690  | 1.31 | 0.39 | 0.27 | 0.99 |
| YNL075W | IMP4   | 11904 | 9116  | 1.31 | 0.39 | 0.27 | 0.99 |

|         |       |       |       |      |      |      |      |
|---------|-------|-------|-------|------|------|------|------|
| YJL084C |       | 3260  | 2498  | 1.31 | 0.38 | 0.27 | 0.99 |
| YLR289W | GUF1  | 4437  | 3400  | 1.31 | 0.38 | 0.27 | 0.99 |
| YLR445W |       | 432   | 331   | 1.31 | 0.38 | 0.27 | 0.99 |
| YNL174W |       | 14063 | 10776 | 1.31 | 0.38 | 0.27 | 0.99 |
| YGR217W | CCH1  | 718   | 550   | 1.30 | 0.38 | 0.27 | 0.99 |
| YLR129W | DIP2  | 10718 | 8215  | 1.30 | 0.38 | 0.27 | 0.99 |
| YLR381W |       | 399   | 306   | 1.30 | 0.38 | 0.27 | 0.99 |
| YAR071W | PHO11 | 18768 | 14388 | 1.30 | 0.38 | 0.27 | 0.99 |
| YFL003C | MSH4  | 595   | 456   | 1.30 | 0.38 | 0.27 | 0.98 |
| YMR323W |       | 622   | 477   | 1.30 | 0.38 | 0.27 | 0.98 |
| YCL019W |       | 23874 | 18312 | 1.30 | 0.38 | 0.27 | 0.98 |
| YNL061W | NOP2  | 18671 | 14323 | 1.30 | 0.38 | 0.27 | 0.98 |
| YJR134C | SGM1  | 5255  | 4032  | 1.30 | 0.38 | 0.27 | 0.98 |
| YHR072W | ERG7  | 1955  | 1500  | 1.30 | 0.38 | 0.27 | 0.98 |
| YAR052C |       | 1418  | 1088  | 1.30 | 0.38 | 0.27 | 0.98 |
| YDR036C |       | 2640  | 2026  | 1.30 | 0.38 | 0.27 | 0.98 |
| YDR023W | SES1  | 3195  | 2452  | 1.30 | 0.38 | 0.27 | 0.98 |
| YGL164C |       | 3519  | 2701  | 1.30 | 0.38 | 0.27 | 0.98 |
| YNL123W |       | 7922  | 6081  | 1.30 | 0.38 | 0.27 | 0.98 |
| YDR509W |       | 718   | 551   | 1.30 | 0.38 | 0.27 | 0.98 |
| YHR017W | YSC83 | 990   | 760   | 1.30 | 0.38 | 0.27 | 0.98 |
| YJR002W | MPP10 | 1813  | 1392  | 1.30 | 0.38 | 0.27 | 0.98 |
| YGL229C | SAP4  | 1400  | 1075  | 1.30 | 0.38 | 0.27 | 0.98 |
| YDL240W | LRG1  | 2245  | 1724  | 1.30 | 0.38 | 0.27 | 0.98 |
| YLR103C | CDC45 | 2842  | 2183  | 1.30 | 0.38 | 0.27 | 0.98 |
| YBR138C | HDR1  | 2022  | 1553  | 1.30 | 0.38 | 0.27 | 0.98 |
| YBL049W |       | 710   | 545   | 1.30 | 0.38 | 0.27 | 0.98 |
| YPL211W | NIP7  | 15616 | 11998 | 1.30 | 0.38 | 0.27 | 0.97 |
| YAR009C |       | 35520 | 27291 | 1.30 | 0.38 | 0.27 | 0.97 |
| YHR074W |       | 5427  | 4170  | 1.30 | 0.38 | 0.27 | 0.97 |
| YCRX20C |       | 1248  | 959   | 1.30 | 0.38 | 0.27 | 0.97 |
| YML119W |       | 17616 | 13536 | 1.30 | 0.38 | 0.27 | 0.97 |
| YMR021C | MAC1  | 5463  | 4198  | 1.30 | 0.38 | 0.27 | 0.97 |
| YCL004W | PGS1  | 1081  | 831   | 1.30 | 0.38 | 0.27 | 0.97 |
| YKRO41W |       | 1106  | 850   | 1.30 | 0.38 | 0.27 | 0.97 |
| YLR008C |       | 7315  | 5626  | 1.30 | 0.38 | 0.27 | 0.97 |

|         |        |       |       |      |      |      |      |
|---------|--------|-------|-------|------|------|------|------|
| YAL002W | VPS8   | 1541  | 1185  | 1.30 | 0.38 | 0.27 | 0.97 |
| YKL134C | 36433  | 1485  | 1142  | 1.30 | 0.38 | 0.27 | 0.97 |
| YBR097W | VPS15  | 370   | 285   | 1.30 | 0.38 | 0.27 | 0.97 |
| YJL019W |        | 1956  | 1505  | 1.30 | 0.38 | 0.27 | 0.97 |
| YJL136C | RPS21B | 20193 | 15536 | 1.30 | 0.38 | 0.27 | 0.97 |
| YMR012W | CLU1   | 897   | 690   | 1.30 | 0.38 | 0.27 | 0.97 |
| YCL076W |        | 577   | 444   | 1.30 | 0.38 | 0.27 | 0.96 |
| YFL023W |        | 8361  | 6436  | 1.30 | 0.38 | 0.27 | 0.96 |
| YBR147W |        | 1065  | 820   | 1.30 | 0.38 | 0.26 | 0.96 |
| YGL098W |        | 4507  | 3471  | 1.30 | 0.38 | 0.26 | 0.96 |
| YBL061C | SKT5   | 2087  | 1608  | 1.30 | 0.38 | 0.26 | 0.96 |
| YJR076C | CDC11  | 3915  | 3016  | 1.30 | 0.38 | 0.26 | 0.96 |
| YOL113W | SKM1   | 3319  | 2557  | 1.30 | 0.38 | 0.26 | 0.96 |
| YGR045C |        | 1686  | 1299  | 1.30 | 0.38 | 0.26 | 0.96 |
| YJL191W | RPS14B | 15329 | 11814 | 1.30 | 0.38 | 0.26 | 0.96 |
| YGL131C |        | 3211  | 2475  | 1.30 | 0.38 | 0.26 | 0.96 |
| YJR042W | NUP85  | 1984  | 1529  | 1.30 | 0.38 | 0.26 | 0.96 |
| YJR029W |        | 381   | 294   | 1.30 | 0.38 | 0.26 | 0.96 |
| YMR099C |        | 8026  | 6187  | 1.30 | 0.38 | 0.26 | 0.96 |
| YGL194C | HOS2   | 8291  | 6392  | 1.30 | 0.38 | 0.26 | 0.96 |
| YMR133W | REC114 | 912   | 703   | 1.30 | 0.38 | 0.26 | 0.96 |
| YEL031W | SPF1   | 554   | 427   | 1.30 | 0.37 | 0.26 | 0.95 |
| YHR093W | AHT1   | 9691  | 7478  | 1.30 | 0.37 | 0.26 | 0.95 |
| YDR525W |        | 671   | 518   | 1.30 | 0.37 | 0.26 | 0.95 |
| YKR054C | DYN1   | 495   | 382   | 1.30 | 0.37 | 0.26 | 0.95 |
| YBR121C | GRS1   | 18087 | 13962 | 1.30 | 0.37 | 0.26 | 0.95 |
| YPR096C |        | 1854  | 1431  | 1.30 | 0.37 | 0.26 | 0.95 |
| YMR137C | PSO2   | 5137  | 3966  | 1.30 | 0.37 | 0.26 | 0.95 |
| YKLO63C |        | 8813  | 6804  | 1.30 | 0.37 | 0.26 | 0.95 |
| YMR242C | RPL20A | 22824 | 17622 | 1.30 | 0.37 | 0.26 | 0.95 |
| YCL074W |        | 958   | 740   | 1.30 | 0.37 | 0.26 | 0.95 |
| YOR092W | ECM3   | 1349  | 1042  | 1.29 | 0.37 | 0.26 | 0.95 |
| YGR283C |        | 9502  | 7339  | 1.29 | 0.37 | 0.26 | 0.95 |
| YOR315W |        | 2593  | 2003  | 1.29 | 0.37 | 0.26 | 0.95 |
| YOL070C |        | 8171  | 6312  | 1.29 | 0.37 | 0.26 | 0.95 |
| YGL256W | ADH4   | 10142 | 7836  | 1.29 | 0.37 | 0.26 | 0.94 |

|         |        |       |       |      |      |      |      |
|---------|--------|-------|-------|------|------|------|------|
| YMR176W | ECM5   | 2228  | 1722  | 1.29 | 0.37 | 0.26 | 0.94 |
| YOR025W | HST3   | 4494  | 3473  | 1.29 | 0.37 | 0.26 | 0.94 |
| YOL052C | SPE2   | 15482 | 11966 | 1.29 | 0.37 | 0.26 | 0.94 |
| YHR117W | TOM71  | 2483  | 1919  | 1.29 | 0.37 | 0.26 | 0.94 |
| YLR431C |        | 2071  | 1601  | 1.29 | 0.37 | 0.26 | 0.94 |
| YPR164W | KIM3   | 2455  | 1898  | 1.29 | 0.37 | 0.26 | 0.94 |
| YMR232W | FUS2   | 361   | 279   | 1.29 | 0.37 | 0.26 | 0.94 |
| YOR084W |        | 3170  | 2451  | 1.29 | 0.37 | 0.26 | 0.94 |
| YEL053C | MAK10  | 1750  | 1353  | 1.29 | 0.37 | 0.26 | 0.94 |
| YGL007W |        | 1791  | 1385  | 1.29 | 0.37 | 0.26 | 0.94 |
| YNL083W |        | 4509  | 3487  | 1.29 | 0.37 | 0.26 | 0.94 |
| YLR451W | LEU3   | 4243  | 3282  | 1.29 | 0.37 | 0.26 | 0.94 |
| YJL039C | NUP192 | 1303  | 1008  | 1.29 | 0.37 | 0.26 | 0.94 |
| YDR440W | DOT1   | 1539  | 1191  | 1.29 | 0.37 | 0.26 | 0.94 |
| YDR398W |        | 11199 | 8665  | 1.29 | 0.37 | 0.26 | 0.94 |
| YBR179C | FZO1   | 4165  | 3223  | 1.29 | 0.37 | 0.26 | 0.94 |
| YBR300C |        | 2503  | 1937  | 1.29 | 0.37 | 0.26 | 0.94 |
| YIL093C |        | 10776 | 8341  | 1.29 | 0.37 | 0.26 | 0.94 |
| YER073W | ALD5   | 3995  | 3092  | 1.29 | 0.37 | 0.26 | 0.93 |
| YKL164C | PIR1   | 540   | 418   | 1.29 | 0.37 | 0.26 | 0.93 |
| YOL015W |        | 3169  | 2453  | 1.29 | 0.37 | 0.26 | 0.93 |
| YKL004W | AUR1   | 18812 | 14563 | 1.29 | 0.37 | 0.26 | 0.93 |
| YDR097C | MSH6   | 4786  | 3706  | 1.29 | 0.37 | 0.26 | 0.93 |
| YDL060W |        | 5731  | 4438  | 1.29 | 0.37 | 0.26 | 0.93 |
| YNL122C |        | 10566 | 8183  | 1.29 | 0.37 | 0.26 | 0.93 |
| YBL034C | STU1   | 1116  | 864   | 1.29 | 0.37 | 0.26 | 0.93 |
| YGL099W |        | 8457  | 6550  | 1.29 | 0.37 | 0.26 | 0.93 |
| YGL234W | ADE5,7 | 8466  | 6558  | 1.29 | 0.37 | 0.26 | 0.93 |
| YKL156W | RPS27A | 12565 | 9733  | 1.29 | 0.37 | 0.26 | 0.93 |
| YPL253C | VIK1   | 1706  | 1322  | 1.29 | 0.37 | 0.26 | 0.93 |
| YLR409C |        | 3180  | 2464  | 1.29 | 0.37 | 0.26 | 0.93 |
| YJL027C |        | 643   | 498   | 1.29 | 0.37 | 0.26 | 0.93 |
| YLR323C |        | 3969  | 3076  | 1.29 | 0.37 | 0.26 | 0.93 |
| YDR321W | ASP1   | 4923  | 3816  | 1.29 | 0.37 | 0.26 | 0.93 |
| YER041W |        | 15219 | 11799 | 1.29 | 0.37 | 0.25 | 0.93 |
| YMR124W |        | 3835  | 2973  | 1.29 | 0.37 | 0.25 | 0.93 |

|           |        |       |       |      |      |      |      |
|-----------|--------|-------|-------|------|------|------|------|
| YMR143W   | RPS16A | 12217 | 9476  | 1.29 | 0.37 | 0.25 | 0.92 |
| YDR220C   |        | 1042  | 808   | 1.29 | 0.37 | 0.25 | 0.92 |
| YOR076C   |        | 2545  | 1975  | 1.29 | 0.37 | 0.25 | 0.92 |
| YGR173W   |        | 8711  | 6759  | 1.29 | 0.37 | 0.25 | 0.92 |
| YER040W   | GLN3   | 5865  | 4551  | 1.29 | 0.37 | 0.25 | 0.92 |
| YHR203C   | RPS4B  | 1683  | 1306  | 1.29 | 0.37 | 0.25 | 0.92 |
| YGL034C   |        | 403   | 313   | 1.29 | 0.37 | 0.25 | 0.92 |
| YLR124W   |        | 604   | 469   | 1.29 | 0.37 | 0.25 | 0.92 |
| YDL087C   | LUC7   | 1558  | 1210  | 1.29 | 0.37 | 0.25 | 0.92 |
| YKL184W   | SPE1   | 6096  | 4733  | 1.29 | 0.37 | 0.25 | 0.92 |
| YAL060W   |        | 9573  | 7436  | 1.29 | 0.36 | 0.25 | 0.92 |
| YLL059C   |        | 1125  | 874   | 1.29 | 0.36 | 0.25 | 0.92 |
| YNL270C   | ALP1   | 859   | 667   | 1.29 | 0.36 | 0.25 | 0.92 |
| YPL095C   |        | 3102  | 2410  | 1.29 | 0.36 | 0.25 | 0.92 |
| YOR116C   | RPO31  | 1471  | 1143  | 1.29 | 0.36 | 0.25 | 0.91 |
| YOR046C   | DBP5   | 11932 | 9272  | 1.29 | 0.36 | 0.25 | 0.91 |
| YLL046C   | RNP1   | 854   | 664   | 1.29 | 0.36 | 0.25 | 0.91 |
| YPL266W   | DIM1   | 16290 | 12660 | 1.29 | 0.36 | 0.25 | 0.91 |
| YGL044C   | RNA15  | 3962  | 3079  | 1.29 | 0.36 | 0.25 | 0.91 |
| YBR043C   |        | 4804  | 3734  | 1.29 | 0.36 | 0.25 | 0.91 |
| YNL140C   |        | 2268  | 1763  | 1.29 | 0.36 | 0.25 | 0.91 |
| YMR236W   | TAF17  | 10779 | 8381  | 1.29 | 0.36 | 0.25 | 0.91 |
| YIR004W   | DJP1   | 10014 | 7791  | 1.29 | 0.36 | 0.25 | 0.91 |
| YMR239C   | RNT1   | 7922  | 6164  | 1.29 | 0.36 | 0.25 | 0.91 |
| YPR116W   |        | 1009  | 785   | 1.29 | 0.36 | 0.25 | 0.91 |
| YOR112W   |        | 3213  | 2500  | 1.29 | 0.36 | 0.25 | 0.91 |
| YLL065W   | GIN11  | 663   | 516   | 1.28 | 0.36 | 0.25 | 0.91 |
| YER053C   |        | 2201  | 1713  | 1.28 | 0.36 | 0.25 | 0.91 |
| YAL058C-A |        | 1172  | 912   | 1.28 | 0.36 | 0.25 | 0.91 |
| YIL127C   |        | 20632 | 16063 | 1.28 | 0.36 | 0.25 | 0.90 |
| YFR021W   |        | 2550  | 1985  | 1.28 | 0.36 | 0.25 | 0.90 |
| YOR365C   |        | 1906  | 1484  | 1.28 | 0.36 | 0.25 | 0.90 |
| YDR213W   |        | 1099  | 856   | 1.28 | 0.36 | 0.25 | 0.90 |
| YDR144C   | MKC7   | 782   | 609   | 1.28 | 0.36 | 0.25 | 0.90 |
| YOR060C   |        | 1959  | 1526  | 1.28 | 0.36 | 0.25 | 0.90 |
| YNL013C   |        | 1010  | 787   | 1.28 | 0.36 | 0.25 | 0.90 |

|         |        |       |       |      |      |      |      |
|---------|--------|-------|-------|------|------|------|------|
| YPR180W | AOS1   | 4373  | 3407  | 1.28 | 0.36 | 0.25 | 0.90 |
| YJR075W | HOC1   | 4535  | 3533  | 1.28 | 0.36 | 0.25 | 0.90 |
| YCLO69W |        | 5718  | 4456  | 1.28 | 0.36 | 0.25 | 0.90 |
| YML113W | DAT1   | 7725  | 6021  | 1.28 | 0.36 | 0.25 | 0.90 |
| YGL215W | CLG1   | 20243 | 15779 | 1.28 | 0.36 | 0.25 | 0.90 |
| YOL148C | SPT20  | 2833  | 2208  | 1.28 | 0.36 | 0.25 | 0.90 |
| YHR185C | ADY1   | 416   | 324   | 1.28 | 0.36 | 0.25 | 0.90 |
| YOR235W | SNR17A | 519   | 405   | 1.28 | 0.36 | 0.25 | 0.90 |
| YLR060W | FRS1   | 16589 | 12935 | 1.28 | 0.36 | 0.25 | 0.90 |
| YIL129C | TAO3   | 1658  | 1293  | 1.28 | 0.36 | 0.25 | 0.90 |
| YLR144C | ACF2   | 3908  | 3048  | 1.28 | 0.36 | 0.25 | 0.90 |
| YNL146W |        | 3139  | 2448  | 1.28 | 0.36 | 0.25 | 0.90 |
| YDL232W | OST4   | 4867  | 3796  | 1.28 | 0.36 | 0.25 | 0.89 |
| YOR018W | ROD1   | 3658  | 2854  | 1.28 | 0.36 | 0.25 | 0.89 |
| YDR101C |        | 10144 | 7914  | 1.28 | 0.36 | 0.25 | 0.89 |
| YHR038W | FIL1   | 5524  | 4311  | 1.28 | 0.36 | 0.25 | 0.89 |
| YBR103W |        | 6518  | 5087  | 1.28 | 0.36 | 0.25 | 0.89 |
| YFLO53W | DAK2   | 980   | 765   | 1.28 | 0.36 | 0.25 | 0.89 |
| YLL015W | BPT1   | 569   | 444   | 1.28 | 0.36 | 0.24 | 0.89 |
| YNL049C | SFB2   | 3206  | 2503  | 1.28 | 0.36 | 0.24 | 0.89 |
| YIR042C |        | 4798  | 3747  | 1.28 | 0.36 | 0.24 | 0.89 |
| YJL075C |        | 1275  | 996   | 1.28 | 0.36 | 0.24 | 0.89 |
| YDR401W |        | 1154  | 901   | 1.28 | 0.36 | 0.24 | 0.89 |
| YDR064W | RPS13  | 34465 | 26923 | 1.28 | 0.36 | 0.24 | 0.89 |
| YMR063W | RIM9   | 2254  | 1761  | 1.28 | 0.36 | 0.24 | 0.89 |
| YDR179C |        | 3891  | 3040  | 1.28 | 0.36 | 0.24 | 0.89 |
| YPL036W | PMA2   | 5198  | 4062  | 1.28 | 0.36 | 0.24 | 0.88 |
| YJL207C |        | 697   | 545   | 1.28 | 0.36 | 0.24 | 0.88 |
| YFRO55W |        | 10005 | 7822  | 1.28 | 0.36 | 0.24 | 0.88 |
| YOR250C | CLP1   | 2439  | 1907  | 1.28 | 0.35 | 0.24 | 0.88 |
| YFLO12W |        | 416   | 325   | 1.28 | 0.35 | 0.24 | 0.88 |
| YOR319W | HSH49  | 6328  | 4949  | 1.28 | 0.35 | 0.24 | 0.88 |
| YER067W |        | 4770  | 3731  | 1.28 | 0.35 | 0.24 | 0.88 |
| YOL034W |        | 2897  | 2266  | 1.28 | 0.35 | 0.24 | 0.88 |
| YMR247C |        | 372   | 291   | 1.28 | 0.35 | 0.24 | 0.88 |
| YHR026W | PPA1   | 4379  | 3427  | 1.28 | 0.35 | 0.24 | 0.88 |

|         |        |       |       |      |      |      |      |
|---------|--------|-------|-------|------|------|------|------|
| YLR373C |        | 4431  | 3468  | 1.28 | 0.35 | 0.24 | 0.88 |
| YLR256W | HAP1   | 2477  | 1939  | 1.28 | 0.35 | 0.24 | 0.88 |
| YBL087C | RPL23A | 10715 | 8388  | 1.28 | 0.35 | 0.24 | 0.88 |
| YDR006C | SOK1   | 1479  | 1158  | 1.28 | 0.35 | 0.24 | 0.88 |
| YKR037C | SPC34  | 8651  | 6773  | 1.28 | 0.35 | 0.24 | 0.87 |
| YDR026C |        | 6295  | 4929  | 1.28 | 0.35 | 0.24 | 0.87 |
| YFR047C |        | 678   | 531   | 1.28 | 0.35 | 0.24 | 0.87 |
| YKL079W | SMY1   | 3601  | 2821  | 1.28 | 0.35 | 0.24 | 0.87 |
| YGL068W |        | 9597  | 7519  | 1.28 | 0.35 | 0.24 | 0.87 |
| YNR045W | PET494 | 3826  | 2998  | 1.28 | 0.35 | 0.24 | 0.87 |
| YJR003C |        | 2264  | 1774  | 1.28 | 0.35 | 0.24 | 0.87 |
| YER124C |        | 20139 | 15784 | 1.28 | 0.35 | 0.24 | 0.87 |
| YML049C | RSE1   | 957   | 750   | 1.28 | 0.35 | 0.24 | 0.87 |
| YER113C |        | 12618 | 9891  | 1.28 | 0.35 | 0.24 | 0.87 |
| YPL201C |        | 362   | 284   | 1.28 | 0.35 | 0.24 | 0.87 |
| YOR273C |        | 610   | 478   | 1.28 | 0.35 | 0.24 | 0.87 |
| YPR184W |        | 2607  | 2044  | 1.28 | 0.35 | 0.24 | 0.87 |
| YFR045W |        | 2377  | 1864  | 1.28 | 0.35 | 0.24 | 0.87 |
| YKL045W | PRI2   | 4977  | 3903  | 1.28 | 0.35 | 0.24 | 0.87 |
| YKL021C | MAK11  | 13471 | 10565 | 1.28 | 0.35 | 0.24 | 0.87 |
| YPL233W |        | 6403  | 5022  | 1.28 | 0.35 | 0.24 | 0.87 |
| YML017W | PSP2   | 511   | 401   | 1.28 | 0.35 | 0.24 | 0.87 |
| YJL155C | FBP26  | 1192  | 935   | 1.27 | 0.35 | 0.24 | 0.87 |
| YHR048W |        | 16269 | 12761 | 1.27 | 0.35 | 0.24 | 0.87 |
| YKR101W | SIR1   | 1966  | 1542  | 1.27 | 0.35 | 0.24 | 0.87 |
| YJR110W |        | 2664  | 2090  | 1.27 | 0.35 | 0.24 | 0.87 |
| YGR160W |        | 5297  | 4156  | 1.27 | 0.35 | 0.24 | 0.86 |
| YKL036C |        | 2313  | 1815  | 1.27 | 0.35 | 0.24 | 0.86 |
| YPR089W |        | 1861  | 1460  | 1.27 | 0.35 | 0.24 | 0.86 |
| YDR333C |        | 826   | 648   | 1.27 | 0.35 | 0.24 | 0.86 |
| YDR184C | ATC1   | 26604 | 20879 | 1.27 | 0.35 | 0.24 | 0.86 |
| YPL283C | YRF1-7 | 3188  | 2502  | 1.27 | 0.35 | 0.24 | 0.86 |
| YFR013W |        | 4327  | 3396  | 1.27 | 0.35 | 0.24 | 0.86 |
| YBR236C | ABD1   | 3996  | 3137  | 1.27 | 0.35 | 0.24 | 0.86 |
| YHR139C | SPS100 | 1828  | 1435  | 1.27 | 0.35 | 0.24 | 0.86 |
| YDL033C |        | 2272  | 1784  | 1.27 | 0.35 | 0.24 | 0.86 |

|           |        |       |       |      |      |      |      |
|-----------|--------|-------|-------|------|------|------|------|
| YGR097W   | ASK10  | 2232  | 1753  | 1.27 | 0.35 | 0.24 | 0.86 |
| YNR033W   | ABZ1   | 5243  | 4117  | 1.27 | 0.35 | 0.24 | 0.86 |
| YAL038W   | CDC19  | 83318 | 65435 | 1.27 | 0.35 | 0.24 | 0.86 |
| YNL227C   |        | 3821  | 3001  | 1.27 | 0.35 | 0.24 | 0.86 |
| YJR053W   | BFA1   | 555   | 436   | 1.27 | 0.35 | 0.24 | 0.86 |
| YCR020C   | PET18  | 8526  | 6698  | 1.27 | 0.35 | 0.24 | 0.86 |
| YJL089W   | SIP4   | 684   | 537   | 1.27 | 0.35 | 0.24 | 0.86 |
| YBR034C   | HMT1   | 20592 | 16178 | 1.27 | 0.35 | 0.24 | 0.86 |
| YKL083W   |        | 369   | 290   | 1.27 | 0.35 | 0.24 | 0.86 |
| YBL103C   | RTG3   | 2484  | 1952  | 1.27 | 0.35 | 0.24 | 0.86 |
| YGL218W   |        | 4306  | 3385  | 1.27 | 0.35 | 0.23 | 0.85 |
| YLR358C   |        | 1429  | 1123  | 1.27 | 0.35 | 0.23 | 0.85 |
| YIL008W   |        | 11445 | 8999  | 1.27 | 0.35 | 0.23 | 0.85 |
| YPR019W   | CDC54  | 3628  | 2853  | 1.27 | 0.35 | 0.23 | 0.85 |
| YLR347C   | KAP95  | 7435  | 5847  | 1.27 | 0.35 | 0.23 | 0.85 |
| YMR121C   | RPL15B | 25059 | 19709 | 1.27 | 0.35 | 0.23 | 0.85 |
| YDL129W   |        | 2813  | 2213  | 1.27 | 0.35 | 0.23 | 0.85 |
| YML026C   | RPS18B | 13476 | 10601 | 1.27 | 0.35 | 0.23 | 0.85 |
| YOR138C   |        | 3081  | 2424  | 1.27 | 0.35 | 0.23 | 0.85 |
| YPL281C   | ERR2   | 1686  | 1326  | 1.27 | 0.35 | 0.23 | 0.85 |
| YNR031C   | SSK2   | 1757  | 1382  | 1.27 | 0.35 | 0.23 | 0.85 |
| YLR383W   | RHC18  | 1683  | 1324  | 1.27 | 0.35 | 0.23 | 0.85 |
| YKL010C   | UFD4   | 7329  | 5768  | 1.27 | 0.35 | 0.23 | 0.85 |
| YNL258C   |        | 2786  | 2193  | 1.27 | 0.35 | 0.23 | 0.85 |
| YOL022C   |        | 11739 | 9241  | 1.27 | 0.35 | 0.23 | 0.85 |
| YJR062C   | NTA1   | 2257  | 1777  | 1.27 | 0.34 | 0.23 | 0.85 |
| YDR221W   |        | 1773  | 1396  | 1.27 | 0.34 | 0.23 | 0.85 |
| YOL153C   |        | 1128  | 888   | 1.27 | 0.34 | 0.23 | 0.85 |
| YPL209C   | IPL1   | 1572  | 1238  | 1.27 | 0.34 | 0.23 | 0.84 |
| YJR094W-A | RPL43B | 1481  | 1166  | 1.27 | 0.34 | 0.23 | 0.84 |
| YML082W   |        | 4405  | 3469  | 1.27 | 0.34 | 0.23 | 0.84 |
| YDL025C   |        | 1601  | 1261  | 1.27 | 0.34 | 0.23 | 0.84 |
| YMR061W   | RNA14  | 16984 | 13379 | 1.27 | 0.34 | 0.23 | 0.84 |
| YDL035C   | GPR1   | 835   | 658   | 1.27 | 0.34 | 0.23 | 0.84 |
| YGL257C   | MNT2   | 407   | 321   | 1.27 | 0.34 | 0.23 | 0.84 |
| YOR349W   | CIN1   | 2921  | 2302  | 1.27 | 0.34 | 0.23 | 0.84 |



|           |        |       |       |      |      |      |      |
|-----------|--------|-------|-------|------|------|------|------|
| YOR038C   | HIR2   | 1664  | 1311  | 1.27 | 0.34 | 0.23 | 0.84 |
| YOL056W   | GPM3   | 4282  | 3374  | 1.27 | 0.34 | 0.23 | 0.84 |
| YNR011C   | PRP2   | 1874  | 1477  | 1.27 | 0.34 | 0.23 | 0.84 |
| YHR010W   | RPL27A | 30704 | 24199 | 1.27 | 0.34 | 0.23 | 0.84 |
| YIL173W   | VTH1   | 2570  | 2026  | 1.27 | 0.34 | 0.23 | 0.84 |
| YDR053W   |        | 1055  | 832   | 1.27 | 0.34 | 0.23 | 0.84 |
| YKL099C   |        | 20189 | 15922 | 1.27 | 0.34 | 0.23 | 0.84 |
| YKR067W   |        | 3271  | 2580  | 1.27 | 0.34 | 0.23 | 0.84 |
| YLR287C   |        | 7301  | 5759  | 1.27 | 0.34 | 0.23 | 0.84 |
| YKR056W   | RNC1   | 2267  | 1788  | 1.27 | 0.34 | 0.23 | 0.84 |
| YPL025C   |        | 976   | 770   | 1.27 | 0.34 | 0.23 | 0.84 |
| YIL009W   | FAA3   | 15951 | 12588 | 1.27 | 0.34 | 0.23 | 0.83 |
| YOL130W   | ALR1   | 1820  | 1436  | 1.27 | 0.34 | 0.23 | 0.83 |
| YBR124W   |        | 536   | 423   | 1.27 | 0.34 | 0.23 | 0.83 |
| YLR057W   |        | 3681  | 2906  | 1.27 | 0.34 | 0.23 | 0.83 |
| YMR014W   |        | 9795  | 7732  | 1.27 | 0.34 | 0.23 | 0.83 |
| YBR274W   | CHK1   | 3707  | 2927  | 1.27 | 0.34 | 0.23 | 0.83 |
| YER044C-A | MEI4   | 774   | 611   | 1.27 | 0.34 | 0.23 | 0.83 |
| YLR088W   | GAA1   | 1098  | 867   | 1.27 | 0.34 | 0.23 | 0.83 |
| YGL144C   |        | 480   | 379   | 1.27 | 0.34 | 0.23 | 0.83 |
| YOR178C   | GAC1   | 2741  | 2165  | 1.27 | 0.34 | 0.23 | 0.83 |
| YDL138W   | RGT2   | 1854  | 1465  | 1.27 | 0.34 | 0.23 | 0.83 |
| YHL027W   | RIM101 | 6886  | 5442  | 1.27 | 0.34 | 0.23 | 0.83 |
| YHR127W   | HSN1   | 1442  | 1140  | 1.27 | 0.34 | 0.23 | 0.82 |
| YCL047C   |        | 524   | 414   | 1.26 | 0.34 | 0.23 | 0.82 |
| YDL093W   | PMT5   | 928   | 734   | 1.26 | 0.34 | 0.23 | 0.82 |
| YIL150C   | DNA43  | 1010  | 799   | 1.26 | 0.34 | 0.23 | 0.82 |
| YMR075C-A |        | 4576  | 3619  | 1.26 | 0.34 | 0.23 | 0.82 |
| YDR491C   |        | 2890  | 2286  | 1.26 | 0.34 | 0.23 | 0.82 |
| YDL150W   | RPC53  | 3236  | 2560  | 1.26 | 0.34 | 0.23 | 0.82 |
| YJL093C   | TOK1   | 2879  | 2278  | 1.26 | 0.34 | 0.23 | 0.82 |
| YMR142C   | RPL13B | 14299 | 11315 | 1.26 | 0.34 | 0.23 | 0.82 |
| YBR023C   | CHS3   | 4029  | 3188  | 1.26 | 0.34 | 0.23 | 0.82 |
| YKR103W   |        | 752   | 595   | 1.26 | 0.34 | 0.23 | 0.82 |
| YNR077C   |        | 551   | 436   | 1.26 | 0.34 | 0.23 | 0.82 |
| YMR166C   |        | 4444  | 3518  | 1.26 | 0.34 | 0.22 | 0.82 |

|         |       |       |       |      |      |      |      |
|---------|-------|-------|-------|------|------|------|------|
| YIL141W |       | 1196  | 947   | 1.26 | 0.34 | 0.22 | 0.82 |
| YKL216W | URA1  | 13282 | 10516 | 1.26 | 0.34 | 0.22 | 0.82 |
| YOR274W | MOD5  | 3385  | 2680  | 1.26 | 0.34 | 0.22 | 0.82 |
| YJL113W |       | 3483  | 2758  | 1.26 | 0.34 | 0.22 | 0.82 |
| YLR393W | ATP10 | 1222  | 968   | 1.26 | 0.34 | 0.22 | 0.81 |
| YOR328W | PDR10 | 1733  | 1373  | 1.26 | 0.34 | 0.22 | 0.81 |
| YLR335W | NUP2  | 2723  | 2157  | 1.26 | 0.34 | 0.22 | 0.81 |
| YDR104C |       | 2622  | 2077  | 1.26 | 0.34 | 0.22 | 0.81 |
| YFL015C |       | 774   | 613   | 1.26 | 0.34 | 0.22 | 0.81 |
| YFR019W | FAB1  | 1646  | 1304  | 1.26 | 0.34 | 0.22 | 0.81 |
| YGL167C | PMR1  | 444   | 352   | 1.26 | 0.34 | 0.22 | 0.81 |
| YDR243C | PRP28 | 967   | 766   | 1.26 | 0.34 | 0.22 | 0.81 |
| YBL109W |       | 1654  | 1311  | 1.26 | 0.34 | 0.22 | 0.81 |
| YBL028C |       | 18585 | 14731 | 1.26 | 0.34 | 0.22 | 0.81 |
| YKL132C | RMA1  | 1243  | 985   | 1.26 | 0.34 | 0.22 | 0.81 |
| YGR188C | BUB1  | 1550  | 1229  | 1.26 | 0.34 | 0.22 | 0.81 |
| YHL013C |       | 16640 | 13193 | 1.26 | 0.33 | 0.22 | 0.81 |
| YGL217C |       | 1400  | 1110  | 1.26 | 0.33 | 0.22 | 0.81 |
| YOR335C | ALA1  | 7632  | 6052  | 1.26 | 0.33 | 0.22 | 0.81 |
| YLR204W | QRI5  | 8740  | 6932  | 1.26 | 0.33 | 0.22 | 0.81 |
| YJR150C | DAN1  | 1844  | 1463  | 1.26 | 0.33 | 0.22 | 0.81 |
| YER025W | GCD11 | 11620 | 9219  | 1.26 | 0.33 | 0.22 | 0.81 |
| YDR505C | PSP1  | 2149  | 1705  | 1.26 | 0.33 | 0.22 | 0.81 |
| YBR083W | TEC1  | 8543  | 6780  | 1.26 | 0.33 | 0.22 | 0.80 |
| YJR138W | IML1  | 514   | 408   | 1.26 | 0.33 | 0.22 | 0.80 |
| YMR134W |       | 4031  | 3200  | 1.26 | 0.33 | 0.22 | 0.80 |
| YDR499W |       | 4738  | 3762  | 1.26 | 0.33 | 0.22 | 0.80 |
| YHR215W | PHO12 | 29884 | 23728 | 1.26 | 0.33 | 0.22 | 0.80 |
| YPRO07C | SPO69 | 528   | 419   | 1.26 | 0.33 | 0.22 | 0.80 |
| YDL171C | GLT1  | 2247  | 1785  | 1.26 | 0.33 | 0.22 | 0.80 |
| YIL110W |       | 7319  | 5814  | 1.26 | 0.33 | 0.22 | 0.80 |
| YMR075W |       | 1479  | 1175  | 1.26 | 0.33 | 0.22 | 0.80 |
| YPL282C |       | 1638  | 1301  | 1.26 | 0.33 | 0.22 | 0.80 |
| YCRX12W |       | 969   | 770   | 1.26 | 0.33 | 0.22 | 0.80 |
| YLR182W | SWI6  | 3511  | 2789  | 1.26 | 0.33 | 0.22 | 0.80 |
| YLL043W | FPS1  | 8608  | 6839  | 1.26 | 0.33 | 0.22 | 0.80 |

|         |       |       |       |      |      |      |      |
|---------|-------|-------|-------|------|------|------|------|
| YLR238W |       | 3224  | 2561  | 1.26 | 0.33 | 0.22 | 0.80 |
| YLR392C |       | 1794  | 1425  | 1.26 | 0.33 | 0.22 | 0.80 |
| YDL238C |       | 1949  | 1549  | 1.26 | 0.33 | 0.22 | 0.80 |
| YHR024C | MAS2  | 7383  | 5867  | 1.26 | 0.33 | 0.22 | 0.80 |
| YBR142W | MAK5  | 8276  | 6577  | 1.26 | 0.33 | 0.22 | 0.80 |
| YIL144W | TID3  | 3616  | 2874  | 1.26 | 0.33 | 0.22 | 0.80 |
| YBR284W |       | 2187  | 1739  | 1.26 | 0.33 | 0.22 | 0.79 |
| YDR312W | SSF2  | 10853 | 8629  | 1.26 | 0.33 | 0.22 | 0.79 |
| YDR211W | GCD6  | 3146  | 2501  | 1.26 | 0.33 | 0.22 | 0.79 |
| YOL154W |       | 4757  | 3783  | 1.26 | 0.33 | 0.22 | 0.79 |
| YHR214W |       | 1788  | 1422  | 1.26 | 0.33 | 0.22 | 0.79 |
| YCRO91W | KIN82 | 1191  | 947   | 1.26 | 0.33 | 0.22 | 0.79 |
| YBR153W | RIB7  | 6919  | 5504  | 1.26 | 0.33 | 0.22 | 0.79 |
| YDR531W |       | 14614 | 11626 | 1.26 | 0.33 | 0.22 | 0.79 |
| YKL172W | EBP2  | 6910  | 5498  | 1.26 | 0.33 | 0.22 | 0.79 |
| YKL158W |       | 686   | 546   | 1.26 | 0.33 | 0.22 | 0.79 |
| YMR240C | CUS1  | 1137  | 905   | 1.26 | 0.33 | 0.22 | 0.79 |
| YGL147C | RPL9A | 36030 | 28669 | 1.26 | 0.33 | 0.22 | 0.79 |
| YJL077C | ICS3  | 997   | 793   | 1.26 | 0.33 | 0.22 | 0.79 |
| YOR110W |       | 1914  | 1523  | 1.26 | 0.33 | 0.22 | 0.79 |
| YOR058C | ASE1  | 1430  | 1138  | 1.26 | 0.33 | 0.22 | 0.79 |
| YGL110C |       | 3228  | 2569  | 1.26 | 0.33 | 0.22 | 0.79 |
| YOL138C |       | 2402  | 1912  | 1.26 | 0.33 | 0.22 | 0.79 |
| YBR134W |       | 1456  | 1159  | 1.26 | 0.33 | 0.22 | 0.79 |
| YKL120W | OAC1  | 2152  | 1713  | 1.26 | 0.33 | 0.22 | 0.79 |
| YDR166C | SEC5  | 1129  | 899   | 1.26 | 0.33 | 0.22 | 0.79 |
| YMR005W | MPT1  | 12466 | 9925  | 1.26 | 0.33 | 0.22 | 0.79 |
| YBR184W |       | 819   | 652   | 1.26 | 0.33 | 0.22 | 0.79 |
| YDR415C |       | 7229  | 5756  | 1.26 | 0.33 | 0.22 | 0.79 |
| YLR134W | PDC5  | 23948 | 19070 | 1.26 | 0.33 | 0.22 | 0.79 |
| YNL033W |       | 602   | 479   | 1.26 | 0.33 | 0.22 | 0.79 |
| YLR098C | CHA4  | 3114  | 2480  | 1.26 | 0.33 | 0.22 | 0.79 |
| YJL127C | SPT10 | 1200  | 956   | 1.26 | 0.33 | 0.22 | 0.78 |
| YGR065C | VHT1  | 8610  | 6858  | 1.26 | 0.33 | 0.22 | 0.78 |
| YKRO80W | MTD1  | 4503  | 3587  | 1.26 | 0.33 | 0.22 | 0.78 |
| YDR193W |       | 1690  | 1346  | 1.26 | 0.33 | 0.22 | 0.78 |

|           |            |       |       |      |      |      |      |
|-----------|------------|-------|-------|------|------|------|------|
| YHR129C   | ARP1       | 1597  | 1272  | 1.26 | 0.33 | 0.22 | 0.78 |
| YER157W   | SEC34      | 7032  | 5603  | 1.26 | 0.33 | 0.22 | 0.78 |
| YKR051W   |            | 3748  | 2988  | 1.25 | 0.33 | 0.21 | 0.78 |
| YBR039W   | ATP3       | 21594 | 17214 | 1.25 | 0.33 | 0.21 | 0.78 |
| YNL298W   | CLA4       | 2664  | 2124  | 1.25 | 0.33 | 0.21 | 0.78 |
| YDR461W   | MFA1       | 912   | 727   | 1.25 | 0.33 | 0.21 | 0.78 |
| YEL064C   |            | 1288  | 1027  | 1.25 | 0.33 | 0.21 | 0.78 |
| YDR495C   | VPS3       | 878   | 700   | 1.25 | 0.33 | 0.21 | 0.78 |
| YHR054C   |            | 13635 | 10878 | 1.25 | 0.33 | 0.21 | 0.78 |
| YDL211C   |            | 1158  | 924   | 1.25 | 0.33 | 0.21 | 0.77 |
| YGR020C   | VMA7       | 11985 | 9564  | 1.25 | 0.33 | 0.21 | 0.77 |
| YLR344W   | RPL26A     | 14100 | 11252 | 1.25 | 0.33 | 0.21 | 0.77 |
| YCR096C   | A2         | 15269 | 12185 | 1.25 | 0.33 | 0.21 | 0.77 |
| YLR028C   | ADE16      | 12904 | 10298 | 1.25 | 0.33 | 0.21 | 0.77 |
| YJR093C   | FIP1       | 2831  | 2260  | 1.25 | 0.33 | 0.21 | 0.77 |
| YOL024W   |            | 807   | 644   | 1.25 | 0.32 | 0.21 | 0.77 |
| YOR337W   | TEA1       | 7671  | 6126  | 1.25 | 0.32 | 0.21 | 0.77 |
| YIL163C   |            | 1040  | 831   | 1.25 | 0.32 | 0.21 | 0.77 |
| YLL017W   |            | 802   | 641   | 1.25 | 0.32 | 0.21 | 0.77 |
| YFL002C   | SPB4       | 11249 | 8987  | 1.25 | 0.32 | 0.21 | 0.77 |
| YKL168C   | KKQ8       | 1334  | 1066  | 1.25 | 0.32 | 0.21 | 0.77 |
| YPL187W   | MF(ALPHA)1 | 18189 | 14532 | 1.25 | 0.32 | 0.21 | 0.77 |
| YDR037W   | KRS1       | 10793 | 8624  | 1.25 | 0.32 | 0.21 | 0.77 |
| YJR036C   |            | 636   | 508   | 1.25 | 0.32 | 0.21 | 0.77 |
| YLR176C   | RFX1       | 1537  | 1228  | 1.25 | 0.32 | 0.21 | 0.77 |
| YFR035C   |            | 1817  | 1452  | 1.25 | 0.32 | 0.21 | 0.77 |
| YOL045W   |            | 841   | 672   | 1.25 | 0.32 | 0.21 | 0.77 |
| YER119C-A |            | 2689  | 2150  | 1.25 | 0.32 | 0.21 | 0.76 |
| YCR099C   |            | 1631  | 1304  | 1.25 | 0.32 | 0.21 | 0.76 |
| YIL071C   |            | 2053  | 1642  | 1.25 | 0.32 | 0.21 | 0.76 |
| YNL094W   |            | 4879  | 3903  | 1.25 | 0.32 | 0.21 | 0.76 |
| YLR024C   |            | 759   | 607   | 1.25 | 0.32 | 0.21 | 0.76 |
| YDL184C   | RPL41A     | 23636 | 18910 | 1.25 | 0.32 | 0.21 | 0.76 |
| YDR489W   |            | 6138  | 4911  | 1.25 | 0.32 | 0.21 | 0.76 |
| YOR379C   |            | 1107  | 886   | 1.25 | 0.32 | 0.21 | 0.76 |
| YGL149W   |            | 1355  | 1084  | 1.25 | 0.32 | 0.21 | 0.76 |

|         |       |       |       |      |      |      |      |
|---------|-------|-------|-------|------|------|------|------|
| YDL133W |       | 4772  | 3819  | 1.25 | 0.32 | 0.21 | 0.76 |
| YML084W |       | 828   | 663   | 1.25 | 0.32 | 0.21 | 0.76 |
| YLR295C | ATP14 | 15187 | 12155 | 1.25 | 0.32 | 0.21 | 0.76 |
| YOL114C |       | 1595  | 1277  | 1.25 | 0.32 | 0.21 | 0.76 |
| YNL151C | RPC31 | 7214  | 5775  | 1.25 | 0.32 | 0.21 | 0.76 |
| YNR057C | BIO4  | 1347  | 1078  | 1.25 | 0.32 | 0.21 | 0.76 |
| YNL308C | KRI1  | 8294  | 6640  | 1.25 | 0.32 | 0.21 | 0.76 |
| YAR062W |       | 1042  | 834   | 1.25 | 0.32 | 0.21 | 0.76 |
| YPL147W | PXA1  | 7796  | 6242  | 1.25 | 0.32 | 0.21 | 0.76 |
| YOL025W | LAG2  | 2469  | 1977  | 1.25 | 0.32 | 0.21 | 0.76 |
| YFRO26C |       | 662   | 530   | 1.25 | 0.32 | 0.21 | 0.76 |
| YBRO41W | FAT1  | 4141  | 3317  | 1.25 | 0.32 | 0.21 | 0.75 |
| YDR091C | RLI1  | 13594 | 10891 | 1.25 | 0.32 | 0.21 | 0.75 |
| YLL037W |       | 4018  | 3219  | 1.25 | 0.32 | 0.21 | 0.75 |
| YOR284W |       | 5966  | 4780  | 1.25 | 0.32 | 0.21 | 0.75 |
| YDR123C | INO2  | 9020  | 7227  | 1.25 | 0.32 | 0.21 | 0.75 |
| YLL041C | SDH2  | 15363 | 12310 | 1.25 | 0.32 | 0.21 | 0.75 |
| YDR261C | EXG2  | 1560  | 1250  | 1.25 | 0.32 | 0.21 | 0.75 |
| YDR493W |       | 9315  | 7466  | 1.25 | 0.32 | 0.21 | 0.75 |
| YNL216W | RAP1  | 10331 | 8282  | 1.25 | 0.32 | 0.21 | 0.75 |
| YLR371W | ROM2  | 2008  | 1610  | 1.25 | 0.32 | 0.21 | 0.75 |
| YDR022C | CIS1  | 4525  | 3628  | 1.25 | 0.32 | 0.21 | 0.75 |
| YCLX03C |       | 511   | 410   | 1.25 | 0.32 | 0.21 | 0.75 |
| YPL039W |       | 2860  | 2294  | 1.25 | 0.32 | 0.21 | 0.75 |
| YLR130C | ZRT2  | 4483  | 3596  | 1.25 | 0.32 | 0.21 | 0.75 |
| YDR514C |       | 2556  | 2051  | 1.25 | 0.32 | 0.21 | 0.75 |
| YLL032C |       | 2865  | 2299  | 1.25 | 0.32 | 0.21 | 0.75 |
| YMR282C | AEP2  | 4107  | 3295  | 1.25 | 0.32 | 0.21 | 0.75 |
| YGL162W | SUT1  | 2596  | 2083  | 1.25 | 0.32 | 0.21 | 0.75 |
| YJL045W |       | 1284  | 1030  | 1.25 | 0.32 | 0.21 | 0.75 |
| YKL102C |       | 422   | 339   | 1.25 | 0.32 | 0.20 | 0.75 |
| YGL211W |       | 5038  | 4044  | 1.25 | 0.32 | 0.20 | 0.74 |
| YKL071W |       | 1557  | 1250  | 1.25 | 0.32 | 0.20 | 0.74 |
| YLR385C |       | 995   | 799   | 1.25 | 0.32 | 0.20 | 0.74 |
| YGR117C |       | 3888  | 3122  | 1.25 | 0.32 | 0.20 | 0.74 |
| YBR079C | RPG1  | 14638 | 11755 | 1.25 | 0.32 | 0.20 | 0.74 |

|         |        |       |       |      |      |      |      |
|---------|--------|-------|-------|------|------|------|------|
| YMR293C |        | 2236  | 1796  | 1.25 | 0.32 | 0.20 | 0.74 |
| YHLO45W |        | 811   | 651   | 1.25 | 0.32 | 0.20 | 0.74 |
| YDR095C |        | 1368  | 1099  | 1.25 | 0.32 | 0.20 | 0.74 |
| YJR049C | UTR1   | 1578  | 1267  | 1.25 | 0.32 | 0.20 | 0.74 |
| YDL061C | RPS29B | 19137 | 15370 | 1.25 | 0.32 | 0.20 | 0.74 |
| YKLO49C | CSE4   | 5668  | 4553  | 1.24 | 0.32 | 0.20 | 0.74 |
| YBR276C | PPS1   | 1058  | 850   | 1.24 | 0.32 | 0.20 | 0.74 |
| YGR023W | MTL1   | 3215  | 2583  | 1.24 | 0.32 | 0.20 | 0.74 |
| YAL051W | YAF1   | 779   | 626   | 1.24 | 0.32 | 0.20 | 0.74 |
| YLR106C |        | 2029  | 1630  | 1.24 | 0.32 | 0.20 | 0.74 |
| YBR140C | IRA1   | 1736  | 1395  | 1.24 | 0.32 | 0.20 | 0.74 |
| YGR115C |        | 1027  | 825   | 1.24 | 0.32 | 0.20 | 0.74 |
| YIL160C | POT1   | 1470  | 1181  | 1.24 | 0.32 | 0.20 | 0.74 |
| YBR174C |        | 1580  | 1270  | 1.24 | 0.32 | 0.20 | 0.74 |
| YPR035W | GLN1   | 28617 | 22998 | 1.24 | 0.32 | 0.20 | 0.74 |
| YBR086C | IST2   | 13944 | 11207 | 1.24 | 0.32 | 0.20 | 0.74 |
| YNL029C | KTR5   | 1770  | 1423  | 1.24 | 0.32 | 0.20 | 0.74 |
| YGR043C |        | 1604  | 1289  | 1.24 | 0.32 | 0.20 | 0.74 |
| YPL119C | DBP1   | 636   | 511   | 1.24 | 0.31 | 0.20 | 0.74 |
| YFL050C | ALR2   | 2126  | 1709  | 1.24 | 0.31 | 0.20 | 0.74 |
| YNR005C |        | 1848  | 1486  | 1.24 | 0.31 | 0.20 | 0.74 |
| YBR090C |        | 9281  | 7462  | 1.24 | 0.31 | 0.20 | 0.74 |
| YBL067C | UBP13  | 1846  | 1484  | 1.24 | 0.31 | 0.20 | 0.73 |
| YFR017C |        | 1295  | 1041  | 1.24 | 0.31 | 0.20 | 0.73 |
| YFR001W |        | 17491 | 14066 | 1.24 | 0.31 | 0.20 | 0.73 |
| YEL006W |        | 5375  | 4324  | 1.24 | 0.31 | 0.20 | 0.73 |
| YNL286W | CUS2   | 2975  | 2393  | 1.24 | 0.31 | 0.20 | 0.73 |
| YJL069C |        | 7724  | 6214  | 1.24 | 0.31 | 0.20 | 0.73 |
| YBL009W |        | 2807  | 2258  | 1.24 | 0.31 | 0.20 | 0.73 |
| YDR339C |        | 9553  | 7686  | 1.24 | 0.31 | 0.20 | 0.73 |
| YML025C |        | 6595  | 5306  | 1.24 | 0.31 | 0.20 | 0.73 |
| YLL033W |        | 2515  | 2024  | 1.24 | 0.31 | 0.20 | 0.73 |
| YOR363C | PIP2   | 1613  | 1298  | 1.24 | 0.31 | 0.20 | 0.73 |
| YKL186C | MTR2   | 7214  | 5805  | 1.24 | 0.31 | 0.20 | 0.73 |
| YCR094W | CDC50  | 11947 | 9615  | 1.24 | 0.31 | 0.20 | 0.73 |
| YAL037W |        | 491   | 395   | 1.24 | 0.31 | 0.20 | 0.73 |

|           |        |       |       |      |      |      |      |
|-----------|--------|-------|-------|------|------|------|------|
| YHR052W   |        | 3677  | 2960  | 1.24 | 0.31 | 0.20 | 0.73 |
| YDR082W   | STN1   | 3296  | 2653  | 1.24 | 0.31 | 0.20 | 0.73 |
| YIL099W   | SGA1   | 843   | 679   | 1.24 | 0.31 | 0.20 | 0.73 |
| YOR024W   |        | 6212  | 5001  | 1.24 | 0.31 | 0.20 | 0.73 |
| YDR500C   | RPL37B | 14935 | 12024 | 1.24 | 0.31 | 0.20 | 0.73 |
| YNL002C   | RLP7   | 40329 | 32471 | 1.24 | 0.31 | 0.20 | 0.73 |
| YPR058W   | YMC1   | 6704  | 5398  | 1.24 | 0.31 | 0.20 | 0.73 |
| YKR040C   |        | 1817  | 1463  | 1.24 | 0.31 | 0.20 | 0.73 |
| YML039W   |        | 34104 | 27463 | 1.24 | 0.31 | 0.20 | 0.73 |
| YOL004W   | SIN3   | 2380  | 1917  | 1.24 | 0.31 | 0.20 | 0.73 |
| YDR342C   | HXT7   | 19982 | 16096 | 1.24 | 0.31 | 0.20 | 0.73 |
| YBR294W   | SUL1   | 1378  | 1110  | 1.24 | 0.31 | 0.20 | 0.73 |
| YOL066C   | RIB2   | 2931  | 2361  | 1.24 | 0.31 | 0.20 | 0.73 |
| YGR199W   | PMT6   | 5617  | 4525  | 1.24 | 0.31 | 0.20 | 0.73 |
| YPR032W   | SRO7   | 3307  | 2664  | 1.24 | 0.31 | 0.20 | 0.73 |
| YDR397C   | NCB2   | 17055 | 13741 | 1.24 | 0.31 | 0.20 | 0.72 |
| YPL275W   |        | 930   | 749   | 1.24 | 0.31 | 0.20 | 0.72 |
| YGR105W   | VMA21  | 633   | 510   | 1.24 | 0.31 | 0.20 | 0.72 |
| YML010W-B |        | 1306  | 1052  | 1.24 | 0.31 | 0.20 | 0.72 |
| YDR152W   |        | 15784 | 12719 | 1.24 | 0.31 | 0.20 | 0.72 |
| YJR131W   | MNS1   | 1061  | 855   | 1.24 | 0.31 | 0.20 | 0.72 |
| YPL115C   | BEM3   | 2211  | 1782  | 1.24 | 0.31 | 0.20 | 0.72 |
| YDL011C   |        | 2340  | 1887  | 1.24 | 0.31 | 0.20 | 0.72 |
| YHR003C   |        | 8518  | 6869  | 1.24 | 0.31 | 0.20 | 0.72 |
| YNL136W   |        | 5366  | 4327  | 1.24 | 0.31 | 0.20 | 0.72 |
| YBR009C   | HHF1   | 23489 | 18942 | 1.24 | 0.31 | 0.20 | 0.72 |
| YJR012C   |        | 1841  | 1485  | 1.24 | 0.31 | 0.20 | 0.72 |
| YDR276C   |        | 1054  | 850   | 1.24 | 0.31 | 0.20 | 0.72 |
| YHL005C   |        | 2268  | 1829  | 1.24 | 0.31 | 0.20 | 0.72 |
| YOL132W   |        | 387   | 312   | 1.24 | 0.31 | 0.20 | 0.72 |
| YMR215W   |        | 1374  | 1108  | 1.24 | 0.31 | 0.20 | 0.72 |
| YCR024C-A | PMP1   | 29217 | 23566 | 1.24 | 0.31 | 0.20 | 0.72 |
| YCR016W   |        | 27099 | 21863 | 1.24 | 0.31 | 0.20 | 0.72 |
| YIR008C   | PRI1   | 12082 | 9748  | 1.24 | 0.31 | 0.20 | 0.72 |
| YBR059C   | AKL1   | 3065  | 2473  | 1.24 | 0.31 | 0.20 | 0.72 |
| YGL251C   | HFM1   | 1802  | 1454  | 1.24 | 0.31 | 0.20 | 0.72 |

|         |       |       |       |      |      |      |      |
|---------|-------|-------|-------|------|------|------|------|
| YJR056C |       | 4805  | 3878  | 1.24 | 0.31 | 0.20 | 0.72 |
| YDL113C |       | 1295  | 1045  | 1.24 | 0.31 | 0.20 | 0.71 |
| YER006W |       | 19103 | 15421 | 1.24 | 0.31 | 0.20 | 0.71 |
| YBRO03W | COQ1  | 3218  | 2598  | 1.24 | 0.31 | 0.20 | 0.71 |
| YLR255C |       | 633   | 511   | 1.24 | 0.31 | 0.20 | 0.71 |
| YDL044C | MTF2  | 2491  | 2011  | 1.24 | 0.31 | 0.20 | 0.71 |
| YOR086C |       | 1199  | 968   | 1.24 | 0.31 | 0.20 | 0.71 |
| YPL251W |       | 6688  | 5400  | 1.24 | 0.31 | 0.20 | 0.71 |
| YHL043W | ECM34 | 1513  | 1222  | 1.24 | 0.31 | 0.20 | 0.71 |
| YDR048C |       | 1683  | 1359  | 1.24 | 0.31 | 0.20 | 0.71 |
| YOR305W |       | 11068 | 8938  | 1.24 | 0.31 | 0.20 | 0.71 |
| YDR009W | GAL3  | 539   | 435   | 1.24 | 0.31 | 0.20 | 0.71 |
| YLR405W |       | 8638  | 6977  | 1.24 | 0.31 | 0.20 | 0.71 |
| YOL118C |       | 2822  | 2279  | 1.24 | 0.31 | 0.20 | 0.71 |
| YBR033W |       | 5666  | 4577  | 1.24 | 0.31 | 0.20 | 0.71 |
| YHL026C |       | 2530  | 2044  | 1.24 | 0.31 | 0.20 | 0.71 |
| YOR200W |       | 2250  | 1818  | 1.24 | 0.31 | 0.20 | 0.71 |
| YML089C |       | 470   | 380   | 1.24 | 0.31 | 0.20 | 0.71 |
| YDR278C |       | 2282  | 1844  | 1.24 | 0.31 | 0.19 | 0.71 |
| YGR292W | MAL12 | 1364  | 1103  | 1.24 | 0.31 | 0.19 | 0.71 |
| YNL230C | ELA1  | 1572  | 1271  | 1.24 | 0.31 | 0.19 | 0.71 |
| YILO25C |       | 714   | 577   | 1.24 | 0.31 | 0.19 | 0.71 |
| YPLO63W |       | 7848  | 6346  | 1.24 | 0.31 | 0.19 | 0.71 |
| YMR313C |       | 1501  | 1214  | 1.24 | 0.31 | 0.19 | 0.70 |
| YJL130C | URA2  | 6452  | 5219  | 1.24 | 0.31 | 0.19 | 0.70 |
| YCRX08W |       | 2779  | 2248  | 1.24 | 0.31 | 0.19 | 0.70 |
| YOL065C | INP54 | 4198  | 3396  | 1.24 | 0.31 | 0.19 | 0.70 |
| YPR044C |       | 1072  | 867   | 1.24 | 0.31 | 0.19 | 0.70 |
| YNL224C |       | 4299  | 3478  | 1.24 | 0.31 | 0.19 | 0.70 |
| YBR148W | YSW1  | 373   | 302   | 1.24 | 0.31 | 0.19 | 0.70 |
| YILO85C | KTR7  | 4503  | 3644  | 1.24 | 0.31 | 0.19 | 0.70 |
| YJR160C |       | 1106  | 895   | 1.24 | 0.31 | 0.19 | 0.70 |
| YJR048W | CYC1  | 17579 | 14226 | 1.24 | 0.31 | 0.19 | 0.70 |
| YDR197W | CBS2  | 3240  | 2622  | 1.24 | 0.31 | 0.19 | 0.70 |
| YJR108W | ABM1  | 1530  | 1238  | 1.24 | 0.31 | 0.19 | 0.70 |
| YLR243W |       | 11705 | 9473  | 1.24 | 0.31 | 0.19 | 0.70 |



|         |        |       |       |      |      |      |      |
|---------|--------|-------|-------|------|------|------|------|
| YMR015C | ERG5   | 30874 | 24988 | 1.24 | 0.31 | 0.19 | 0.70 |
| YIL095W | PRK1   | 6957  | 5632  | 1.24 | 0.30 | 0.19 | 0.70 |
| YBR226C |        | 1342  | 1087  | 1.24 | 0.30 | 0.19 | 0.70 |
| YJR121W | ATP2   | 5124  | 4149  | 1.23 | 0.30 | 0.19 | 0.70 |
| YLR210W | CLB4   | 2705  | 2191  | 1.23 | 0.30 | 0.19 | 0.70 |
| YDL227C | HO     | 919   | 744   | 1.23 | 0.30 | 0.19 | 0.70 |
| YBL013W |        | 510   | 413   | 1.23 | 0.30 | 0.19 | 0.70 |
| YJR080C |        | 6208  | 5028  | 1.23 | 0.30 | 0.19 | 0.70 |
| YKL022C | CDC16  | 1720  | 1393  | 1.23 | 0.30 | 0.19 | 0.70 |
| YFR012W |        | 1107  | 897   | 1.23 | 0.30 | 0.19 | 0.70 |
| YDR541C |        | 1779  | 1441  | 1.23 | 0.30 | 0.19 | 0.70 |
| YDL109C |        | 2007  | 1626  | 1.23 | 0.30 | 0.19 | 0.70 |
| YER172C | BRR2   | 2487  | 2015  | 1.23 | 0.30 | 0.19 | 0.69 |
| YLR334C |        | 634   | 514   | 1.23 | 0.30 | 0.19 | 0.69 |
| YDR275W |        | 3500  | 2836  | 1.23 | 0.30 | 0.19 | 0.69 |
| YGL156W | AMS1   | 2396  | 1942  | 1.23 | 0.30 | 0.19 | 0.69 |
| YGR054W |        | 14234 | 11536 | 1.23 | 0.30 | 0.19 | 0.69 |
| YKL220C | FRE2   | 684   | 554   | 1.23 | 0.30 | 0.19 | 0.69 |
| YCR010C |        | 1795  | 1455  | 1.23 | 0.30 | 0.19 | 0.69 |
| YOL020W | TAT2   | 12380 | 10036 | 1.23 | 0.30 | 0.19 | 0.69 |
| YER188W |        | 2021  | 1638  | 1.23 | 0.30 | 0.19 | 0.69 |
| YPR043W | RPL43A | 13105 | 10624 | 1.23 | 0.30 | 0.19 | 0.69 |
| YER190W | YRF1-2 | 10946 | 8875  | 1.23 | 0.30 | 0.19 | 0.69 |
| YDR357C |        | 9388  | 7612  | 1.23 | 0.30 | 0.19 | 0.69 |
| YPL181W |        | 5601  | 4542  | 1.23 | 0.30 | 0.19 | 0.69 |
| YMR172W | HOT1   | 1232  | 999   | 1.23 | 0.30 | 0.19 | 0.69 |
| YCR021C | HSP30  | 2689  | 2181  | 1.23 | 0.30 | 0.19 | 0.69 |
| YOL095C | HMI1   | 2649  | 2149  | 1.23 | 0.30 | 0.19 | 0.69 |
| YNL170W |        | 3885  | 3152  | 1.23 | 0.30 | 0.19 | 0.69 |
| YBR180W |        | 1805  | 1464  | 1.23 | 0.30 | 0.19 | 0.69 |
| YDL158C |        | 839   | 681   | 1.23 | 0.30 | 0.19 | 0.69 |
| YGL111W |        | 20893 | 16954 | 1.23 | 0.30 | 0.19 | 0.69 |
| YPR115W |        | 811   | 658   | 1.23 | 0.30 | 0.19 | 0.69 |
| YPR056W | TFB4   | 6574  | 5337  | 1.23 | 0.30 | 0.19 | 0.68 |
| YPL273W |        | 1204  | 978   | 1.23 | 0.30 | 0.19 | 0.68 |
| YLR214W | FRE1   | 15608 | 12675 | 1.23 | 0.30 | 0.19 | 0.68 |

|         |        |       |       |      |      |      |      |
|---------|--------|-------|-------|------|------|------|------|
| YNL264C | PDR17  | 4725  | 3837  | 1.23 | 0.30 | 0.19 | 0.68 |
| YLR430W | SEN1   | 1338  | 1087  | 1.23 | 0.30 | 0.19 | 0.68 |
| YOR373W | NUD1   | 7224  | 5867  | 1.23 | 0.30 | 0.19 | 0.68 |
| YNL201C |        | 865   | 703   | 1.23 | 0.30 | 0.19 | 0.68 |
| YDR473C | PRP3   | 3739  | 3038  | 1.23 | 0.30 | 0.19 | 0.68 |
| YNR015W | SMM1   | 7373  | 5991  | 1.23 | 0.30 | 0.19 | 0.68 |
| YKL115C |        | 2231  | 1813  | 1.23 | 0.30 | 0.19 | 0.68 |
| YEL032W | MCM3   | 1059  | 861   | 1.23 | 0.30 | 0.19 | 0.68 |
| YDR369C | XRS2   | 2597  | 2111  | 1.23 | 0.30 | 0.19 | 0.68 |
| YGR095C | RRP46  | 7414  | 6026  | 1.23 | 0.30 | 0.19 | 0.68 |
| YPL065W | VPS28  | 2566  | 2086  | 1.23 | 0.30 | 0.19 | 0.68 |
| YBR036C | CSG2   | 478   | 389   | 1.23 | 0.30 | 0.19 | 0.68 |
| YDR271C |        | 846   | 688   | 1.23 | 0.30 | 0.19 | 0.68 |
| YJL114W |        | 1042  | 847   | 1.23 | 0.30 | 0.19 | 0.68 |
| YGR011W |        | 2786  | 2266  | 1.23 | 0.30 | 0.19 | 0.68 |
| YER104W | RTT105 | 2174  | 1768  | 1.23 | 0.30 | 0.19 | 0.67 |
| YMR254C |        | 817   | 665   | 1.23 | 0.30 | 0.19 | 0.67 |
| YER107C | GLE2   | 15169 | 12340 | 1.23 | 0.30 | 0.19 | 0.67 |
| YPL086C | ELP3   | 16053 | 13060 | 1.23 | 0.30 | 0.19 | 0.67 |
| YOR011W |        | 1230  | 1001  | 1.23 | 0.30 | 0.19 | 0.67 |
| YPR132W | RPS23B | 20897 | 17002 | 1.23 | 0.30 | 0.19 | 0.67 |
| YJL157C | FAR1   | 1241  | 1010  | 1.23 | 0.30 | 0.19 | 0.67 |
| YGR239C | PEX21  | 3732  | 3037  | 1.23 | 0.30 | 0.18 | 0.67 |
| YNL059C | ARP5   | 8857  | 7208  | 1.23 | 0.30 | 0.18 | 0.67 |
| YJR051W | OSM1   | 1068  | 869   | 1.23 | 0.30 | 0.18 | 0.67 |
| YKL039W | PTM1   | 1735  | 1412  | 1.23 | 0.30 | 0.18 | 0.67 |
| YNL172W | APC1   | 2450  | 1994  | 1.23 | 0.30 | 0.18 | 0.67 |
| YDR315C | IPK1   | 2674  | 2177  | 1.23 | 0.30 | 0.18 | 0.67 |
| YJR154W |        | 472   | 384   | 1.23 | 0.30 | 0.18 | 0.67 |
| YPL137C |        | 472   | 384   | 1.23 | 0.30 | 0.18 | 0.67 |
| YGR073C |        | 6204  | 5051  | 1.23 | 0.30 | 0.18 | 0.67 |
| YPR110C | RPC40  | 31737 | 25841 | 1.23 | 0.30 | 0.18 | 0.67 |
| YGL212W | VAM7   | 2753  | 2242  | 1.23 | 0.30 | 0.18 | 0.67 |
| YLR141W | RRN5   | 1739  | 1416  | 1.23 | 0.30 | 0.18 | 0.67 |
| YMR212C |        | 977   | 796   | 1.23 | 0.30 | 0.18 | 0.67 |
| YLR193C |        | 32130 | 26172 | 1.23 | 0.30 | 0.18 | 0.67 |

|           |           |       |       |      |      |      |      |
|-----------|-----------|-------|-------|------|------|------|------|
| YBR131W   | CCZ1      | 2455  | 2000  | 1.23 | 0.30 | 0.18 | 0.67 |
| YCR039C   | MATALPHA2 | 20869 | 17000 | 1.23 | 0.30 | 0.18 | 0.67 |
| YGL197W   | MDS3      | 2112  | 1721  | 1.23 | 0.30 | 0.18 | 0.67 |
| YOR338W   |           | 528   | 430   | 1.23 | 0.30 | 0.18 | 0.67 |
| YCL060C   |           | 1031  | 840   | 1.23 | 0.30 | 0.18 | 0.66 |
| YDR005C   | MAF1      | 4489  | 3659  | 1.23 | 0.30 | 0.18 | 0.66 |
| YBR001C   | NTH2      | 682   | 556   | 1.23 | 0.30 | 0.18 | 0.66 |
| YDL216C   |           | 1435  | 1170  | 1.23 | 0.29 | 0.18 | 0.66 |
| YIL054W   |           | 813   | 663   | 1.23 | 0.29 | 0.18 | 0.66 |
| YOR094W   | ARF3      | 4287  | 3495  | 1.23 | 0.29 | 0.18 | 0.66 |
| YNL015W   | PBI2      | 6886  | 5614  | 1.23 | 0.29 | 0.18 | 0.66 |
| YNL232W   | CSL4      | 19068 | 15546 | 1.23 | 0.29 | 0.18 | 0.66 |
| YML073C   | RPL6A     | 6461  | 5268  | 1.23 | 0.29 | 0.18 | 0.66 |
| YHR027C   | RPN1      | 5553  | 4528  | 1.23 | 0.29 | 0.18 | 0.66 |
| YHR217C   |           | 1049  | 855   | 1.23 | 0.29 | 0.18 | 0.66 |
| YNL158W   |           | 8004  | 6527  | 1.23 | 0.29 | 0.18 | 0.66 |
| YNL018C   |           | 2108  | 1719  | 1.23 | 0.29 | 0.18 | 0.66 |
| YFR005C   | SAD1      | 7453  | 6078  | 1.23 | 0.29 | 0.18 | 0.66 |
| YHR171W   | APG7      | 1725  | 1407  | 1.23 | 0.29 | 0.18 | 0.66 |
| YFL040W   |           | 559   | 456   | 1.23 | 0.29 | 0.18 | 0.66 |
| YLR319C   | BUD6      | 5765  | 4702  | 1.23 | 0.29 | 0.18 | 0.66 |
| YPL011C   | TAF47     | 10221 | 8337  | 1.23 | 0.29 | 0.18 | 0.66 |
| YBR088C   | POL30     | 8567  | 6988  | 1.23 | 0.29 | 0.18 | 0.66 |
| YDL037C   |           | 403   | 329   | 1.23 | 0.29 | 0.18 | 0.66 |
| YLL018C-A | COX19     | 12242 | 9988  | 1.23 | 0.29 | 0.18 | 0.66 |
| YLR411W   | CTR3      | 1232  | 1005  | 1.23 | 0.29 | 0.18 | 0.66 |
| YKR035C   |           | 12819 | 10460 | 1.23 | 0.29 | 0.18 | 0.66 |
| YHR107C   | CDC12     | 8353  | 6816  | 1.23 | 0.29 | 0.18 | 0.66 |
| YDL213C   |           | 5039  | 4112  | 1.23 | 0.29 | 0.18 | 0.66 |
| YGR112W   | SHY1      | 7422  | 6057  | 1.23 | 0.29 | 0.18 | 0.66 |
| YPR015C   |           | 591   | 482   | 1.23 | 0.29 | 0.18 | 0.66 |
| YLR113W   | HOG1      | 17453 | 14249 | 1.22 | 0.29 | 0.18 | 0.66 |
| YAR007C   | RFA1      | 3776  | 3083  | 1.22 | 0.29 | 0.18 | 0.65 |
| YGR100W   | MDR1      | 3858  | 3150  | 1.22 | 0.29 | 0.18 | 0.65 |
| YCL006C   |           | 2269  | 1853  | 1.22 | 0.29 | 0.18 | 0.65 |
| YBR208C   | DUR1,2    | 811   | 662   | 1.22 | 0.29 | 0.18 | 0.65 |

|           |        |       |       |      |      |      |      |
|-----------|--------|-------|-------|------|------|------|------|
| YKL148C   | SDH1   | 5824  | 4756  | 1.22 | 0.29 | 0.18 | 0.65 |
| YBL037W   | APL3   | 1878  | 1534  | 1.22 | 0.29 | 0.18 | 0.65 |
| YDR427W   | RPN9   | 1830  | 1495  | 1.22 | 0.29 | 0.18 | 0.65 |
| YML096W   |        | 2897  | 2366  | 1.22 | 0.29 | 0.18 | 0.65 |
| YLR312C   |        | 1055  | 862   | 1.22 | 0.29 | 0.18 | 0.65 |
| YDL121C   |        | 5107  | 4173  | 1.22 | 0.29 | 0.18 | 0.65 |
| YIL133C   | RPL16A | 22422 | 18321 | 1.22 | 0.29 | 0.18 | 0.65 |
| YJL175W   |        | 1774  | 1450  | 1.22 | 0.29 | 0.18 | 0.65 |
| YMR159C   | APG16  | 1446  | 1182  | 1.22 | 0.29 | 0.18 | 0.65 |
| YAL056W   |        | 1668  | 1363  | 1.22 | 0.29 | 0.18 | 0.65 |
| YNR013C   |        | 5137  | 4199  | 1.22 | 0.29 | 0.18 | 0.65 |
| YFL013W-A |        | 1013  | 828   | 1.22 | 0.29 | 0.18 | 0.65 |
| YML047C   |        | 500   | 409   | 1.22 | 0.29 | 0.18 | 0.65 |
| YNL105W   |        | 779   | 637   | 1.22 | 0.29 | 0.18 | 0.65 |
| YJL026W   | RNR2   | 12638 | 10332 | 1.22 | 0.29 | 0.18 | 0.65 |
| YER151C   | UBP3   | 535   | 437   | 1.22 | 0.29 | 0.18 | 0.65 |
| YEL057C   |        | 651   | 532   | 1.22 | 0.29 | 0.18 | 0.65 |
| YDL136W   | RPL35B | 17396 | 14223 | 1.22 | 0.29 | 0.18 | 0.65 |
| YCR051W   |        | 11263 | 9209  | 1.22 | 0.29 | 0.18 | 0.65 |
| YGR071C   |        | 2525  | 2065  | 1.22 | 0.29 | 0.18 | 0.65 |
| YIL119C   | RPI1   | 6239  | 5103  | 1.22 | 0.29 | 0.18 | 0.65 |
| YPR141C   | KAR3   | 5716  | 4675  | 1.22 | 0.29 | 0.18 | 0.65 |
| YGL246C   | RAI1   | 17464 | 14285 | 1.22 | 0.29 | 0.18 | 0.65 |
| YBR299W   | MAL32  | 3446  | 2819  | 1.22 | 0.29 | 0.18 | 0.65 |
| YPL278C   |        | 1040  | 851   | 1.22 | 0.29 | 0.18 | 0.65 |
| YNL073W   | MSK1   | 5818  | 4760  | 1.22 | 0.29 | 0.18 | 0.64 |
| YGL086W   | MAD1   | 2051  | 1678  | 1.22 | 0.29 | 0.18 | 0.64 |
| YOR360C   | PDE2   | 7359  | 6022  | 1.22 | 0.29 | 0.18 | 0.64 |
| YLL063C   | AYT1   | 2867  | 2346  | 1.22 | 0.29 | 0.18 | 0.64 |
| YHR212C   |        | 644   | 527   | 1.22 | 0.29 | 0.18 | 0.64 |
| YOL131W   |        | 448   | 367   | 1.22 | 0.29 | 0.18 | 0.64 |
| YOR364W   |        | 585   | 479   | 1.22 | 0.29 | 0.18 | 0.64 |
| YDR187C   |        | 2007  | 1643  | 1.22 | 0.29 | 0.18 | 0.64 |
| YAL011W   |        | 1720  | 1408  | 1.22 | 0.29 | 0.18 | 0.64 |
| YPL146C   |        | 17099 | 14000 | 1.22 | 0.29 | 0.18 | 0.64 |
| YJR130C   |        | 5180  | 4241  | 1.22 | 0.29 | 0.18 | 0.64 |

|         |        |       |       |      |      |      |      |
|---------|--------|-------|-------|------|------|------|------|
| YNL019C |        | 800   | 655   | 1.22 | 0.29 | 0.18 | 0.64 |
| YMR047C | NUP116 | 8716  | 7139  | 1.22 | 0.29 | 0.18 | 0.64 |
| YGL055W | OLE1   | 16726 | 13704 | 1.22 | 0.29 | 0.18 | 0.64 |
| YOL116W | MSN1   | 2685  | 2200  | 1.22 | 0.29 | 0.17 | 0.64 |
| YJR005W | APL1   | 2662  | 2181  | 1.22 | 0.29 | 0.17 | 0.64 |
| YLL001W | DNM1   | 2025  | 1659  | 1.22 | 0.29 | 0.17 | 0.64 |
| YOR108W |        | 3002  | 2460  | 1.22 | 0.29 | 0.17 | 0.64 |
| YPR034W | ARP7   | 6935  | 5683  | 1.22 | 0.29 | 0.17 | 0.64 |
| YKR097W | PCK1   | 3806  | 3119  | 1.22 | 0.29 | 0.17 | 0.64 |
| YIL059C |        | 2122  | 1739  | 1.22 | 0.29 | 0.17 | 0.63 |
| YBR177C | EHT1   | 1486  | 1218  | 1.22 | 0.29 | 0.17 | 0.63 |
| YDR102C |        | 1088  | 892   | 1.22 | 0.29 | 0.17 | 0.63 |
| YEL045C |        | 1586  | 1300  | 1.22 | 0.29 | 0.17 | 0.63 |
| YOR242C | SSP2   | 4708  | 3860  | 1.22 | 0.29 | 0.17 | 0.63 |
| YJR102C |        | 4556  | 3736  | 1.22 | 0.29 | 0.17 | 0.63 |
| YJL193W |        | 5557  | 4557  | 1.22 | 0.29 | 0.17 | 0.63 |
| YGRO47C | TFC4   | 4041  | 3314  | 1.22 | 0.29 | 0.17 | 0.63 |
| YHL009C | YAP3   | 3543  | 2906  | 1.22 | 0.29 | 0.17 | 0.63 |
| YNL086W |        | 1094  | 897   | 1.22 | 0.29 | 0.17 | 0.63 |
| YBR048W | RPS11B | 3021  | 2478  | 1.22 | 0.29 | 0.17 | 0.63 |
| YLR128W |        | 1837  | 1507  | 1.22 | 0.29 | 0.17 | 0.63 |
| YJL083W |        | 912   | 748   | 1.22 | 0.29 | 0.17 | 0.63 |
| YLR321C | SFH1   | 8867  | 7274  | 1.22 | 0.29 | 0.17 | 0.63 |
| YDL223C |        | 686   | 563   | 1.22 | 0.29 | 0.17 | 0.63 |
| YGL134W | PCL10  | 2372  | 1946  | 1.22 | 0.29 | 0.17 | 0.63 |
| YNL225C | CNM67  | 3373  | 2768  | 1.22 | 0.28 | 0.17 | 0.63 |
| YJL099W | CHS6   | 3943  | 3236  | 1.22 | 0.28 | 0.17 | 0.63 |
| YER182W |        | 7769  | 6377  | 1.22 | 0.28 | 0.17 | 0.63 |
| YGL186C |        | 9211  | 7561  | 1.22 | 0.28 | 0.17 | 0.63 |
| YLL028W | TPO1   | 8111  | 6658  | 1.22 | 0.28 | 0.17 | 0.63 |
| YDR347W | MRP1   | 23664 | 19426 | 1.22 | 0.28 | 0.17 | 0.63 |
| YPR088C | SRP54  | 8599  | 7059  | 1.22 | 0.28 | 0.17 | 0.63 |
| YIL132C |        | 2983  | 2449  | 1.22 | 0.28 | 0.17 | 0.63 |
| YLR282C |        | 3005  | 2467  | 1.22 | 0.28 | 0.17 | 0.63 |
| YJL074C | SMC3   | 3517  | 2888  | 1.22 | 0.28 | 0.17 | 0.63 |
| YGR287C |        | 4038  | 3316  | 1.22 | 0.28 | 0.17 | 0.63 |

|         |       |       |       |      |      |      |      |
|---------|-------|-------|-------|------|------|------|------|
| YOR191W | RIS1  | 4026  | 3306  | 1.22 | 0.28 | 0.17 | 0.62 |
| YOL115W | TRF4  | 3367  | 2765  | 1.22 | 0.28 | 0.17 | 0.62 |
| YMR187C |       | 958   | 787   | 1.22 | 0.28 | 0.17 | 0.62 |
| YAL065C |       | 634   | 521   | 1.22 | 0.28 | 0.17 | 0.62 |
| YDR530C | APA2  | 578   | 475   | 1.22 | 0.28 | 0.17 | 0.62 |
| YJL091C |       | 1679  | 1379  | 1.22 | 0.28 | 0.17 | 0.62 |
| YDR535C |       | 934   | 767   | 1.22 | 0.28 | 0.17 | 0.62 |
| YJR094C | IME1  | 689   | 566   | 1.22 | 0.28 | 0.17 | 0.62 |
| YJL179W | PFD1  | 7135  | 5862  | 1.22 | 0.28 | 0.17 | 0.62 |
| YJR127C | ZMS1  | 2729  | 2242  | 1.22 | 0.28 | 0.17 | 0.62 |
| YCR089W | FIG2  | 4934  | 4054  | 1.22 | 0.28 | 0.17 | 0.62 |
| YKL110C | KTI12 | 8293  | 6814  | 1.22 | 0.28 | 0.17 | 0.62 |
| YPL151C | PRP46 | 4111  | 3379  | 1.22 | 0.28 | 0.17 | 0.62 |
| YNL221C | POP1  | 5092  | 4186  | 1.22 | 0.28 | 0.17 | 0.62 |
| YOR343C |       | 507   | 417   | 1.22 | 0.28 | 0.17 | 0.62 |
| YLR234W | TOP3  | 2082  | 1712  | 1.22 | 0.28 | 0.17 | 0.62 |
| YJR066W | TOR1  | 2346  | 1929  | 1.22 | 0.28 | 0.17 | 0.62 |
| YOR043W | WHI2  | 10902 | 8966  | 1.22 | 0.28 | 0.17 | 0.62 |
| YPL105C |       | 6101  | 5018  | 1.22 | 0.28 | 0.17 | 0.62 |
| YEL043W |       | 1504  | 1237  | 1.22 | 0.28 | 0.17 | 0.62 |
| YCR044C |       | 4848  | 3988  | 1.22 | 0.28 | 0.17 | 0.62 |
| YOR268C |       | 1459  | 1200  | 1.22 | 0.28 | 0.17 | 0.62 |
| YER005W | YND1  | 2621  | 2156  | 1.22 | 0.28 | 0.17 | 0.62 |
| YLL054C |       | 2686  | 2210  | 1.22 | 0.28 | 0.17 | 0.62 |
| YBR240C | THI2  | 2924  | 2406  | 1.22 | 0.28 | 0.17 | 0.61 |
| YDR088C | SLU7  | 5736  | 4720  | 1.22 | 0.28 | 0.17 | 0.61 |
| YPR021C |       | 2766  | 2276  | 1.22 | 0.28 | 0.17 | 0.61 |
| YDL222C |       | 2175  | 1790  | 1.22 | 0.28 | 0.17 | 0.61 |
| YER168C | CCA1  | 12949 | 10657 | 1.22 | 0.28 | 0.17 | 0.61 |
| YJL046W |       | 4688  | 3858  | 1.22 | 0.28 | 0.17 | 0.61 |
| YBL008W | HIR1  | 2622  | 2158  | 1.22 | 0.28 | 0.17 | 0.61 |
| YIL055C |       | 1485  | 1222  | 1.21 | 0.28 | 0.17 | 0.61 |
| YNL272C | SEC2  | 3482  | 2866  | 1.21 | 0.28 | 0.17 | 0.61 |
| YLR082C | SRL2  | 3408  | 2806  | 1.21 | 0.28 | 0.17 | 0.61 |
| YLR052W |       | 5705  | 4697  | 1.21 | 0.28 | 0.17 | 0.61 |
| YOL158C |       | 1992  | 1640  | 1.21 | 0.28 | 0.17 | 0.61 |

|           |       |       |       |      |      |      |      |
|-----------|-------|-------|-------|------|------|------|------|
| YCRX09C   |       | 816   | 672   | 1.21 | 0.28 | 0.17 | 0.61 |
| YOR048C   | RAT1  | 1545  | 1272  | 1.21 | 0.28 | 0.17 | 0.61 |
| YOR322C   |       | 935   | 770   | 1.21 | 0.28 | 0.17 | 0.61 |
| YJR120W   |       | 1282  | 1056  | 1.21 | 0.28 | 0.17 | 0.61 |
| YPL092W   | SSU1  | 6733  | 5545  | 1.21 | 0.28 | 0.17 | 0.61 |
| YDR446W   | ECM11 | 618   | 509   | 1.21 | 0.28 | 0.17 | 0.61 |
| YBL053W   |       | 1170  | 964   | 1.21 | 0.28 | 0.17 | 0.61 |
| YLL030C   |       | 617   | 508   | 1.21 | 0.28 | 0.17 | 0.61 |
| YDR340W   |       | 7999  | 6591  | 1.21 | 0.28 | 0.17 | 0.61 |
| YDR403W   | DIT1  | 2518  | 2075  | 1.21 | 0.28 | 0.17 | 0.61 |
| YMR111C   |       | 4580  | 3774  | 1.21 | 0.28 | 0.17 | 0.61 |
| YCR018C   | SRD1  | 809   | 667   | 1.21 | 0.28 | 0.17 | 0.61 |
| YJR026W   |       | 16962 | 13980 | 1.21 | 0.28 | 0.17 | 0.61 |
| YPL198W   | RPL7B | 27740 | 22863 | 1.21 | 0.28 | 0.17 | 0.61 |
| YOR104W   |       | 3631  | 2993  | 1.21 | 0.28 | 0.17 | 0.60 |
| YMR145C   |       | 6982  | 5755  | 1.21 | 0.28 | 0.17 | 0.60 |
| YKR078W   |       | 1993  | 1643  | 1.21 | 0.28 | 0.17 | 0.60 |
| YOR317W   | FAA1  | 4604  | 3796  | 1.21 | 0.28 | 0.17 | 0.60 |
| YLR020C   |       | 10524 | 8677  | 1.21 | 0.28 | 0.17 | 0.60 |
| YBR051W   |       | 622   | 513   | 1.21 | 0.28 | 0.17 | 0.60 |
| YHR113W   |       | 6349  | 5236  | 1.21 | 0.28 | 0.17 | 0.60 |
| YHR079C-B |       | 1318  | 1087  | 1.21 | 0.28 | 0.17 | 0.60 |
| YHR111W   |       | 7198  | 5937  | 1.21 | 0.28 | 0.17 | 0.60 |
| YPR150W   |       | 1906  | 1572  | 1.21 | 0.28 | 0.17 | 0.60 |
| YDR472W   | TRS31 | 9655  | 7965  | 1.21 | 0.28 | 0.17 | 0.60 |
| YCL055W   | KAR4  | 13568 | 11193 | 1.21 | 0.28 | 0.17 | 0.60 |
| YNL250W   | RAD50 | 1198  | 988   | 1.21 | 0.28 | 0.17 | 0.60 |
| YGL004C   |       | 2908  | 2399  | 1.21 | 0.28 | 0.17 | 0.60 |
| YPL241C   | CIN2  | 6262  | 5167  | 1.21 | 0.28 | 0.17 | 0.60 |
| YGL252C   | RTG2  | 12880 | 10630 | 1.21 | 0.28 | 0.16 | 0.60 |
| YPL185W   |       | 458   | 378   | 1.21 | 0.28 | 0.16 | 0.60 |
| YOR355W   | GDS1  | 16153 | 13333 | 1.21 | 0.28 | 0.16 | 0.60 |
| YOR070C   | GYP1  | 3012  | 2486  | 1.21 | 0.28 | 0.16 | 0.60 |
| YML019W   | OST6  | 5509  | 4548  | 1.21 | 0.28 | 0.16 | 0.60 |
| YNL282W   | POP3  | 2573  | 2124  | 1.21 | 0.28 | 0.16 | 0.60 |
| YJR052W   | RAD7  | 2481  | 2049  | 1.21 | 0.28 | 0.16 | 0.60 |

|           |       |       |       |      |      |      |      |
|-----------|-------|-------|-------|------|------|------|------|
| YGR261C   | APL6  | 3784  | 3126  | 1.21 | 0.28 | 0.16 | 0.59 |
| YJL187C   | SWE1  | 1003  | 829   | 1.21 | 0.28 | 0.16 | 0.59 |
| YPR012W   |       | 1370  | 1132  | 1.21 | 0.28 | 0.16 | 0.59 |
| YLR271W   |       | 2012  | 1663  | 1.21 | 0.28 | 0.16 | 0.59 |
| YML010W   | SPT5  | 4021  | 3323  | 1.21 | 0.27 | 0.16 | 0.59 |
| YDR405W   | MRP20 | 10470 | 8654  | 1.21 | 0.27 | 0.16 | 0.59 |
| YGL130W   | CEG1  | 4197  | 3469  | 1.21 | 0.27 | 0.16 | 0.59 |
| YGL176C   |       | 4354  | 3599  | 1.21 | 0.27 | 0.16 | 0.59 |
| YOR233W   | KIN4  | 1377  | 1138  | 1.21 | 0.27 | 0.16 | 0.59 |
| YLR047C   |       | 893   | 738   | 1.21 | 0.27 | 0.16 | 0.59 |
| YDR083W   |       | 6238  | 5157  | 1.21 | 0.27 | 0.16 | 0.59 |
| YGL124C   |       | 651   | 538   | 1.21 | 0.27 | 0.16 | 0.59 |
| YGR092W   | DBF2  | 8889  | 7349  | 1.21 | 0.27 | 0.16 | 0.59 |
| YGL114W   |       | 2213  | 1830  | 1.21 | 0.27 | 0.16 | 0.59 |
| YLR394W   |       | 1762  | 1457  | 1.21 | 0.27 | 0.16 | 0.59 |
| YMR278W   |       | 1111  | 919   | 1.21 | 0.27 | 0.16 | 0.59 |
| YNL131W   | TOM22 | 3070  | 2539  | 1.21 | 0.27 | 0.16 | 0.59 |
| YOL136C   | PFK27 | 13288 | 10989 | 1.21 | 0.27 | 0.16 | 0.59 |
| YHR071W   | PCL5  | 2135  | 1766  | 1.21 | 0.27 | 0.16 | 0.59 |
| YOR254C   | SEC63 | 5006  | 4141  | 1.21 | 0.27 | 0.16 | 0.59 |
| YDR421W   |       | 5587  | 4622  | 1.21 | 0.27 | 0.16 | 0.59 |
| YLL034C   |       | 6727  | 5566  | 1.21 | 0.27 | 0.16 | 0.59 |
| YDR377W   | ATP17 | 12934 | 10702 | 1.21 | 0.27 | 0.16 | 0.58 |
| YAR042W   | SWH1  | 3457  | 2861  | 1.21 | 0.27 | 0.16 | 0.58 |
| YGL235W   |       | 1676  | 1387  | 1.21 | 0.27 | 0.16 | 0.58 |
| YLR453C   | RIF2  | 1185  | 981   | 1.21 | 0.27 | 0.16 | 0.58 |
| YJR027W   |       | 2712  | 2245  | 1.21 | 0.27 | 0.16 | 0.58 |
| YHR143W-A | RPC10 | 1475  | 1221  | 1.21 | 0.27 | 0.16 | 0.58 |
| YDL236W   | PHO13 | 8185  | 6775  | 1.21 | 0.27 | 0.16 | 0.58 |
| YDR539W   |       | 1984  | 1642  | 1.21 | 0.27 | 0.16 | 0.58 |
| YGL222C   |       | 5617  | 4650  | 1.21 | 0.27 | 0.16 | 0.58 |
| YNL233W   | BNI4  | 3591  | 2973  | 1.21 | 0.27 | 0.16 | 0.58 |
| YLR080W   |       | 965   | 799   | 1.21 | 0.27 | 0.16 | 0.58 |
| YOR353C   |       | 8123  | 6726  | 1.21 | 0.27 | 0.16 | 0.58 |
| YOL150C   |       | 9163  | 7588  | 1.21 | 0.27 | 0.16 | 0.58 |
| YMR051C   |       | 8910  | 7379  | 1.21 | 0.27 | 0.16 | 0.58 |



|         |         |       |       |      |      |      |      |
|---------|---------|-------|-------|------|------|------|------|
| YHR165C | PRP8    | 1044  | 865   | 1.21 | 0.27 | 0.16 | 0.58 |
| YGL107C |         | 9233  | 7647  | 1.21 | 0.27 | 0.16 | 0.58 |
| YMR146C | TIF34   | 18452 | 15286 | 1.21 | 0.27 | 0.16 | 0.58 |
| YGR241C | YAP1802 | 361   | 299   | 1.21 | 0.27 | 0.16 | 0.58 |
| YFL025C | BST1    | 6841  | 5668  | 1.21 | 0.27 | 0.16 | 0.58 |
| YKR105C |         | 1450  | 1202  | 1.21 | 0.27 | 0.16 | 0.58 |
| YIL014W | MNT3    | 2406  | 1994  | 1.21 | 0.27 | 0.16 | 0.58 |
| YOL050C |         | 3043  | 2522  | 1.21 | 0.27 | 0.16 | 0.58 |
| YBR081C | SPT7    | 3698  | 3065  | 1.21 | 0.27 | 0.16 | 0.58 |
| YCRX16C |         | 10570 | 8763  | 1.21 | 0.27 | 0.16 | 0.57 |
| YKL174C |         | 1630  | 1351  | 1.21 | 0.27 | 0.16 | 0.57 |
| YJR028W |         | 6760  | 5605  | 1.21 | 0.27 | 0.16 | 0.57 |
| YER186C |         | 9878  | 8191  | 1.21 | 0.27 | 0.16 | 0.57 |
| YDR301W | CFT1    | 1348  | 1118  | 1.21 | 0.27 | 0.16 | 0.57 |
| YJL070C |         | 3675  | 3048  | 1.21 | 0.27 | 0.16 | 0.57 |
| YCR053W | THR4    | 15344 | 12729 | 1.21 | 0.27 | 0.16 | 0.57 |
| YNL034W |         | 1560  | 1294  | 1.21 | 0.27 | 0.16 | 0.57 |
| YPL230W | USV1    | 988   | 820   | 1.21 | 0.27 | 0.16 | 0.57 |
| YCR032W | BPH1    | 591   | 490   | 1.21 | 0.27 | 0.16 | 0.57 |
| YCL013W |         | 3244  | 2692  | 1.21 | 0.27 | 0.16 | 0.57 |
| YMR067C |         | 3038  | 2521  | 1.20 | 0.27 | 0.16 | 0.57 |
| YDR322W | MRPL35  | 6001  | 4981  | 1.20 | 0.27 | 0.16 | 0.57 |
| YCRO45C |         | 8629  | 7163  | 1.20 | 0.27 | 0.16 | 0.57 |
| YLR264W | RPS28B  | 26261 | 21800 | 1.20 | 0.27 | 0.16 | 0.57 |
| YJR040W | GEF1    | 3532  | 2933  | 1.20 | 0.27 | 0.16 | 0.57 |
| YKR085C | MRPL20  | 6071  | 5041  | 1.20 | 0.27 | 0.16 | 0.57 |
| YDR424C | DYN2    | 1851  | 1537  | 1.20 | 0.27 | 0.16 | 0.57 |
| YAL017W | FUN31   | 4236  | 3518  | 1.20 | 0.27 | 0.16 | 0.57 |
| YOL079W |         | 626   | 520   | 1.20 | 0.27 | 0.16 | 0.57 |
| YBL031W | SHE1    | 2272  | 1887  | 1.20 | 0.27 | 0.16 | 0.57 |
| YNL304W | YPT11   | 2018  | 1676  | 1.20 | 0.27 | 0.16 | 0.56 |
| YLR435W |         | 6915  | 5744  | 1.20 | 0.27 | 0.16 | 0.56 |
| YDR241W |         | 1128  | 937   | 1.20 | 0.27 | 0.16 | 0.56 |
| YJL030W | MAD2    | 10290 | 8549  | 1.20 | 0.27 | 0.15 | 0.56 |
| YML072C |         | 2376  | 1974  | 1.20 | 0.27 | 0.15 | 0.56 |
| YDR189W | SLY1    | 3966  | 3295  | 1.20 | 0.27 | 0.15 | 0.56 |

|         |        |       |       |      |      |      |      |
|---------|--------|-------|-------|------|------|------|------|
| YDR337W | MRPS28 | 6904  | 5737  | 1.20 | 0.27 | 0.15 | 0.56 |
| YEL063C | CAN1   | 4280  | 3557  | 1.20 | 0.27 | 0.15 | 0.56 |
| YOR022C |        | 3423  | 2845  | 1.20 | 0.27 | 0.15 | 0.56 |
| YGL228W | SHE10  | 18548 | 15416 | 1.20 | 0.27 | 0.15 | 0.56 |
| YBR075W |        | 5635  | 4685  | 1.20 | 0.27 | 0.15 | 0.56 |
| YPR006C | ICL2   | 4303  | 3578  | 1.20 | 0.27 | 0.15 | 0.56 |
| YOL104C | NDJ1   | 4571  | 3801  | 1.20 | 0.27 | 0.15 | 0.56 |
| YFR009W | GCN20  | 11229 | 9337  | 1.20 | 0.27 | 0.15 | 0.56 |
| YOR153W | PDR5   | 24118 | 20054 | 1.20 | 0.27 | 0.15 | 0.56 |
| YMR218C | TRS130 | 510   | 424   | 1.20 | 0.27 | 0.15 | 0.56 |
| YIL006W |        | 1029  | 856   | 1.20 | 0.27 | 0.15 | 0.56 |
| YLR310C | CDC25  | 489   | 407   | 1.20 | 0.27 | 0.15 | 0.56 |
| YPL277C |        | 1687  | 1403  | 1.20 | 0.27 | 0.15 | 0.56 |
| YBR127C | VMA2   | 20659 | 17182 | 1.20 | 0.27 | 0.15 | 0.56 |
| YOR334W | MRS2   | 3348  | 2785  | 1.20 | 0.27 | 0.15 | 0.56 |
| YEL042W | GDA1   | 3932  | 3271  | 1.20 | 0.27 | 0.15 | 0.56 |
| YDR316W |        | 6420  | 5341  | 1.20 | 0.27 | 0.15 | 0.56 |
| YOL018C | TLG2   | 8529  | 7096  | 1.20 | 0.27 | 0.15 | 0.56 |
| YMR256C | COX7   | 5569  | 4634  | 1.20 | 0.27 | 0.15 | 0.56 |
| YHL004W | MRP4   | 9628  | 8012  | 1.20 | 0.27 | 0.15 | 0.56 |
| YDR062W | LCB2   | 16001 | 13317 | 1.20 | 0.26 | 0.15 | 0.55 |
| YOR065W | CYT1   | 4663  | 3881  | 1.20 | 0.26 | 0.15 | 0.55 |
| YHR030C | SLT2   | 753   | 627   | 1.20 | 0.26 | 0.15 | 0.55 |
| YJL182C |        | 793   | 660   | 1.20 | 0.26 | 0.15 | 0.55 |
| YIL174W |        | 812   | 676   | 1.20 | 0.26 | 0.15 | 0.55 |
| YNL204C | SPS18  | 1307  | 1088  | 1.20 | 0.26 | 0.15 | 0.55 |
| YMR164C | MSS11  | 2789  | 2322  | 1.20 | 0.26 | 0.15 | 0.55 |
| YJR035W | RAD26  | 425   | 354   | 1.20 | 0.26 | 0.15 | 0.55 |
| YDR351W | SBE2   | 5979  | 4979  | 1.20 | 0.26 | 0.15 | 0.55 |
| YGR257C |        | 5798  | 4828  | 1.20 | 0.26 | 0.15 | 0.55 |
| YGR169C |        | 2280  | 1899  | 1.20 | 0.26 | 0.15 | 0.55 |
| YBR105C | VID24  | 5198  | 4329  | 1.20 | 0.26 | 0.15 | 0.55 |
| YJR142W |        | 4800  | 3998  | 1.20 | 0.26 | 0.15 | 0.55 |
| YAL046C |        | 6033  | 5026  | 1.20 | 0.26 | 0.15 | 0.55 |
| YAR020C | PAU7   | 521   | 434   | 1.20 | 0.26 | 0.15 | 0.55 |
| YDR371W |        | 9107  | 7592  | 1.20 | 0.26 | 0.15 | 0.55 |

|         |        |       |       |      |      |      |      |
|---------|--------|-------|-------|------|------|------|------|
| YLL051C | FRE6   | 10241 | 8537  | 1.20 | 0.26 | 0.15 | 0.55 |
| YCR015C |        | 1038  | 865   | 1.20 | 0.26 | 0.15 | 0.55 |
| YKL075C |        | 3014  | 2513  | 1.20 | 0.26 | 0.15 | 0.55 |
| YOR243C |        | 3970  | 3310  | 1.20 | 0.26 | 0.15 | 0.54 |
| YNL212W |        | 478   | 399   | 1.20 | 0.26 | 0.15 | 0.54 |
| YKR025W | RPC37  | 14839 | 12375 | 1.20 | 0.26 | 0.15 | 0.54 |
| YGL139W |        | 9125  | 7610  | 1.20 | 0.26 | 0.15 | 0.54 |
| YDR259C | YAP6   | 644   | 537   | 1.20 | 0.26 | 0.15 | 0.54 |
| YBL063W | KIP1   | 1714  | 1430  | 1.20 | 0.26 | 0.15 | 0.54 |
| YNL176C |        | 9958  | 8310  | 1.20 | 0.26 | 0.15 | 0.54 |
| YLR448W | RPL6B  | 13230 | 11042 | 1.20 | 0.26 | 0.15 | 0.54 |
| YNL236W | SIN4   | 2551  | 2129  | 1.20 | 0.26 | 0.15 | 0.54 |
| YGR039W |        | 2688  | 2244  | 1.20 | 0.26 | 0.15 | 0.54 |
| YIL039W |        | 9240  | 7716  | 1.20 | 0.26 | 0.15 | 0.54 |
| YER180C | ISC10  | 7952  | 6641  | 1.20 | 0.26 | 0.15 | 0.54 |
| YGR247W |        | 2306  | 1926  | 1.20 | 0.26 | 0.15 | 0.54 |
| YLR241W |        | 4692  | 3919  | 1.20 | 0.26 | 0.15 | 0.54 |
| YML093W |        | 3352  | 2800  | 1.20 | 0.26 | 0.15 | 0.54 |
| YFR040W | SAP155 | 5720  | 4778  | 1.20 | 0.26 | 0.15 | 0.54 |
| YGR190C |        | 6725  | 5618  | 1.20 | 0.26 | 0.15 | 0.53 |
| YPR039W |        | 2212  | 1848  | 1.20 | 0.26 | 0.15 | 0.53 |
| YBR007C |        | 787   | 658   | 1.20 | 0.26 | 0.15 | 0.53 |
| YNL229C | URE2   | 15349 | 12828 | 1.20 | 0.26 | 0.15 | 0.53 |
| YDL039C |        | 1342  | 1122  | 1.20 | 0.26 | 0.15 | 0.53 |
| YLR092W | SUL2   | 3182  | 2660  | 1.20 | 0.26 | 0.15 | 0.53 |
| YGR194C | XKS1   | 1830  | 1530  | 1.20 | 0.26 | 0.15 | 0.53 |
| YER047C | SAP1   | 4778  | 3994  | 1.20 | 0.26 | 0.15 | 0.53 |
| YPL179W | PPQ1   | 4085  | 3415  | 1.20 | 0.26 | 0.15 | 0.53 |
| YKR087C |        | 8309  | 6947  | 1.20 | 0.26 | 0.15 | 0.53 |
| YLR156W |        | 2301  | 1924  | 1.20 | 0.26 | 0.15 | 0.53 |
| YGL239C |        | 1498  | 1253  | 1.20 | 0.26 | 0.15 | 0.53 |
| YNL106C | INP52  | 4714  | 3942  | 1.20 | 0.26 | 0.15 | 0.53 |
| YBL004W |        | 705   | 590   | 1.20 | 0.26 | 0.15 | 0.53 |
| YMR158W |        | 8406  | 7031  | 1.20 | 0.26 | 0.15 | 0.53 |
| YDR228C | PCF11  | 2258  | 1889  | 1.20 | 0.26 | 0.15 | 0.53 |
| YGL258W |        | 1143  | 956   | 1.20 | 0.26 | 0.15 | 0.53 |

|         |        |       |       |      |      |      |      |
|---------|--------|-------|-------|------|------|------|------|
| YLR004C |        | 1409  | 1179  | 1.20 | 0.26 | 0.15 | 0.53 |
| YLL029W |        | 6476  | 5418  | 1.20 | 0.26 | 0.14 | 0.53 |
| YIL122W |        | 4685  | 3920  | 1.20 | 0.26 | 0.14 | 0.53 |
| YAL027W |        | 4066  | 3402  | 1.20 | 0.26 | 0.14 | 0.53 |
| YBR150C | TBS1   | 2137  | 1788  | 1.20 | 0.26 | 0.14 | 0.53 |
| YJL018W |        | 3501  | 2930  | 1.19 | 0.26 | 0.14 | 0.53 |
| YPR064W |        | 1053  | 881   | 1.19 | 0.26 | 0.14 | 0.53 |
| YCL064C | CHA1   | 8418  | 7046  | 1.19 | 0.26 | 0.14 | 0.52 |
| YHL017W |        | 9951  | 8329  | 1.19 | 0.26 | 0.14 | 0.52 |
| YDR442W |        | 786   | 658   | 1.19 | 0.26 | 0.14 | 0.52 |
| YIL052C | RPL34B | 37398 | 31306 | 1.19 | 0.26 | 0.14 | 0.52 |
| YLR147C | SMD3   | 5813  | 4866  | 1.19 | 0.26 | 0.14 | 0.52 |
| YDR462W | MRPL28 | 5799  | 4855  | 1.19 | 0.26 | 0.14 | 0.52 |
| YDR076W | RAD55  | 2809  | 2352  | 1.19 | 0.26 | 0.14 | 0.52 |
| YPL255W | BBP1   | 11485 | 9616  | 1.19 | 0.26 | 0.14 | 0.52 |
| YNL001W | DOM34  | 8994  | 7531  | 1.19 | 0.26 | 0.14 | 0.52 |
| YOL091W | SPO21  | 831   | 696   | 1.19 | 0.26 | 0.14 | 0.52 |
| YER176W | ECM32  | 4834  | 4048  | 1.19 | 0.26 | 0.14 | 0.52 |
| YBR019C | GAL10  | 793   | 664   | 1.19 | 0.26 | 0.14 | 0.52 |
| YEL004W | YEA4   | 1989  | 1666  | 1.19 | 0.26 | 0.14 | 0.52 |
| YCRX18C |        | 2098  | 1758  | 1.19 | 0.26 | 0.14 | 0.52 |
| YPR013C |        | 1571  | 1316  | 1.19 | 0.26 | 0.14 | 0.52 |
| YMR243C | ZRC1   | 5379  | 4507  | 1.19 | 0.26 | 0.14 | 0.52 |
| YOL140W | ARG8   | 5989  | 5018  | 1.19 | 0.26 | 0.14 | 0.52 |
| YGL203C | KEX1   | 5311  | 4450  | 1.19 | 0.26 | 0.14 | 0.52 |
| YBL111C |        | 1033  | 866   | 1.19 | 0.26 | 0.14 | 0.52 |
| YMR191W |        | 1211  | 1015  | 1.19 | 0.25 | 0.14 | 0.52 |
| YOR101W | RAS1   | 6883  | 5769  | 1.19 | 0.25 | 0.14 | 0.52 |
| YOR350C | MNE1   | 2738  | 2295  | 1.19 | 0.25 | 0.14 | 0.52 |
| YPR166C | MRP2   | 4037  | 3384  | 1.19 | 0.25 | 0.14 | 0.52 |
| YOL036W |        | 7418  | 6218  | 1.19 | 0.25 | 0.14 | 0.52 |
| YOL145C | CTR9   | 4904  | 4111  | 1.19 | 0.25 | 0.14 | 0.52 |
| YHR090C | NBN1   | 1345  | 1128  | 1.19 | 0.25 | 0.14 | 0.51 |
| YOR054C |        | 1753  | 1470  | 1.19 | 0.25 | 0.14 | 0.51 |
| YBL033C | RIB1   | 3960  | 3322  | 1.19 | 0.25 | 0.14 | 0.51 |
| YDR477W | SNF1   | 4675  | 3922  | 1.19 | 0.25 | 0.14 | 0.51 |

|         |        |       |       |      |      |      |      |
|---------|--------|-------|-------|------|------|------|------|
| YOL053W |        | 6001  | 5035  | 1.19 | 0.25 | 0.14 | 0.51 |
| YPR055W | SEC8   | 3096  | 2599  | 1.19 | 0.25 | 0.14 | 0.51 |
| YLR171W |        | 17974 | 15087 | 1.19 | 0.25 | 0.14 | 0.51 |
| YNL252C | MRPL17 | 5556  | 4664  | 1.19 | 0.25 | 0.14 | 0.51 |
| YIL027C |        | 5445  | 4572  | 1.19 | 0.25 | 0.14 | 0.51 |
| YHR022C |        | 3217  | 2701  | 1.19 | 0.25 | 0.14 | 0.51 |
| YIL105C |        | 8865  | 7446  | 1.19 | 0.25 | 0.14 | 0.51 |
| YFR056C |        | 10807 | 9077  | 1.19 | 0.25 | 0.14 | 0.51 |
| YPR040W |        | 5859  | 4922  | 1.19 | 0.25 | 0.14 | 0.51 |
| YMR089C | YTA12  | 7636  | 6415  | 1.19 | 0.25 | 0.14 | 0.51 |
| YJL214W | HXT8   | 1437  | 1207  | 1.19 | 0.25 | 0.14 | 0.51 |
| YHR066W | SSF1   | 2606  | 2189  | 1.19 | 0.25 | 0.14 | 0.51 |
| YBR234C | ARC40  | 2071  | 1740  | 1.19 | 0.25 | 0.14 | 0.51 |
| YIL151C |        | 1176  | 988   | 1.19 | 0.25 | 0.14 | 0.50 |
| YIL094C | LYS12  | 16319 | 13715 | 1.19 | 0.25 | 0.14 | 0.50 |
| YDR484W | SAC2   | 1174  | 987   | 1.19 | 0.25 | 0.14 | 0.50 |
| YDR122W | KIN1   | 3226  | 2712  | 1.19 | 0.25 | 0.14 | 0.50 |
| YGR036C | CAX4   | 4197  | 3528  | 1.19 | 0.25 | 0.14 | 0.50 |
| YDL244W | THI13  | 1044  | 878   | 1.19 | 0.25 | 0.14 | 0.50 |
| YBR271W |        | 19738 | 16593 | 1.19 | 0.25 | 0.14 | 0.50 |
| YNL285W |        | 2133  | 1793  | 1.19 | 0.25 | 0.14 | 0.50 |
| YML033W |        | 3090  | 2598  | 1.19 | 0.25 | 0.14 | 0.50 |
| YGL084C |        | 3787  | 3185  | 1.19 | 0.25 | 0.14 | 0.50 |
| YOR367W | SCP1   | 5929  | 4987  | 1.19 | 0.25 | 0.14 | 0.50 |
| YAL021C | CCR4   | 3646  | 3067  | 1.19 | 0.25 | 0.14 | 0.50 |
| YJR083C |        | 5917  | 4978  | 1.19 | 0.25 | 0.14 | 0.50 |
| YOR080W |        | 2448  | 2060  | 1.19 | 0.25 | 0.14 | 0.50 |
| YJL095W | BCK1   | 1319  | 1110  | 1.19 | 0.25 | 0.14 | 0.50 |
| YCL030C | HIS4   | 14420 | 12135 | 1.19 | 0.25 | 0.14 | 0.50 |
| YAR061W |        | 1107  | 932   | 1.19 | 0.25 | 0.14 | 0.50 |
| YGR141W |        | 2232  | 1879  | 1.19 | 0.25 | 0.14 | 0.50 |
| YLR454W |        | 1252  | 1054  | 1.19 | 0.25 | 0.14 | 0.50 |
| YKR031C | SPO14  | 707   | 595   | 1.19 | 0.25 | 0.14 | 0.49 |
| YBR189W | RPS9B  | 44678 | 37623 | 1.19 | 0.25 | 0.14 | 0.49 |
| YHR121W |        | 2051  | 1727  | 1.19 | 0.25 | 0.14 | 0.49 |
| YFLO04W |        | 13403 | 11289 | 1.19 | 0.25 | 0.14 | 0.49 |

|           |         |       |       |      |      |      |      |
|-----------|---------|-------|-------|------|------|------|------|
| YDR227W   | SIR4    | 632   | 532   | 1.19 | 0.25 | 0.14 | 0.49 |
| YJL105W   |         | 1497  | 1261  | 1.19 | 0.25 | 0.14 | 0.49 |
| YOR192C   |         | 1676  | 1412  | 1.19 | 0.25 | 0.13 | 0.49 |
| YML048W-A |         | 432   | 364   | 1.19 | 0.25 | 0.13 | 0.49 |
| YGR280C   |         | 5009  | 4221  | 1.19 | 0.25 | 0.13 | 0.49 |
| YGL112C   | TAF60   | 8138  | 6858  | 1.19 | 0.25 | 0.13 | 0.49 |
| YBR031W   | RPL4A   | 17133 | 14439 | 1.19 | 0.25 | 0.13 | 0.49 |
| YNR038W   | DBP6    | 15813 | 13327 | 1.19 | 0.25 | 0.13 | 0.49 |
| YOR216C   | RUD3    | 5157  | 4346  | 1.19 | 0.25 | 0.13 | 0.49 |
| YLR363C   | NMD4    | 6055  | 5103  | 1.19 | 0.25 | 0.13 | 0.49 |
| YDL218W   |         | 1275  | 1075  | 1.19 | 0.25 | 0.13 | 0.49 |
| YGL049C   | TIF4632 | 10904 | 9190  | 1.19 | 0.25 | 0.13 | 0.49 |
| YPL022W   | RAD1    | 1650  | 1391  | 1.19 | 0.25 | 0.13 | 0.49 |
| YOR382W   |         | 2859  | 2410  | 1.19 | 0.25 | 0.13 | 0.49 |
| YGL172W   | NUP49   | 11610 | 9790  | 1.19 | 0.25 | 0.13 | 0.49 |
| YCRX06W   |         | 2390  | 2015  | 1.19 | 0.25 | 0.13 | 0.49 |
| YLR263W   | RED1    | 1297  | 1094  | 1.19 | 0.25 | 0.13 | 0.49 |
| YOL098C   |         | 10545 | 8893  | 1.19 | 0.25 | 0.13 | 0.49 |
| YDL013W   | HEX3    | 6999  | 5903  | 1.19 | 0.25 | 0.13 | 0.48 |
| YDL016C   |         | 3228  | 2723  | 1.19 | 0.25 | 0.13 | 0.48 |
| YGR068C   |         | 1435  | 1211  | 1.19 | 0.25 | 0.13 | 0.48 |
| YBR216C   |         | 2532  | 2136  | 1.19 | 0.25 | 0.13 | 0.48 |
| YGL160W   |         | 11753 | 9916  | 1.19 | 0.25 | 0.13 | 0.48 |
| YPL161C   | BEM4    | 1166  | 984   | 1.19 | 0.24 | 0.13 | 0.48 |
| YPR118W   |         | 18977 | 16015 | 1.18 | 0.24 | 0.13 | 0.48 |
| YNR070W   |         | 1316  | 1111  | 1.18 | 0.24 | 0.13 | 0.48 |
| YOR260W   | GCD1    | 11911 | 10053 | 1.18 | 0.24 | 0.13 | 0.48 |
| YJR101W   |         | 569   | 480   | 1.18 | 0.24 | 0.13 | 0.48 |
| YMR217W   | GUA1    | 13398 | 11310 | 1.18 | 0.24 | 0.13 | 0.48 |
| YLR258W   | GSY2    | 3754  | 3169  | 1.18 | 0.24 | 0.13 | 0.48 |
| YNR047W   |         | 3576  | 3019  | 1.18 | 0.24 | 0.13 | 0.48 |
| YOL087C   |         | 1073  | 906   | 1.18 | 0.24 | 0.13 | 0.48 |
| YHR078W   |         | 1497  | 1264  | 1.18 | 0.24 | 0.13 | 0.48 |
| YHR020W   |         | 15453 | 13049 | 1.18 | 0.24 | 0.13 | 0.48 |
| YBR146W   | MRPS9   | 10518 | 8883  | 1.18 | 0.24 | 0.13 | 0.48 |
| YMR052C-A |         | 3263  | 2756  | 1.18 | 0.24 | 0.13 | 0.48 |

|           |        |       |       |      |      |      |      |
|-----------|--------|-------|-------|------|------|------|------|
| YIL097W   |        | 4562  | 3853  | 1.18 | 0.24 | 0.13 | 0.48 |
| YBR232C   |        | 1971  | 1665  | 1.18 | 0.24 | 0.13 | 0.48 |
| YEL009C   | GCN4   | 23672 | 19995 | 1.18 | 0.24 | 0.13 | 0.48 |
| YOL094C   | RFC4   | 9453  | 7985  | 1.18 | 0.24 | 0.13 | 0.48 |
| YGL240W   | DOC1   | 1299  | 1097  | 1.18 | 0.24 | 0.13 | 0.48 |
| YBR017C   | KAP104 | 751   | 634   | 1.18 | 0.24 | 0.13 | 0.48 |
| YAL025C   | MAK16  | 8569  | 7240  | 1.18 | 0.24 | 0.13 | 0.48 |
| YNL206C   |        | 12394 | 10473 | 1.18 | 0.24 | 0.13 | 0.47 |
| YDR407C   | TRS120 | 3162  | 2672  | 1.18 | 0.24 | 0.13 | 0.47 |
| YJR095W   | SFC1   | 1214  | 1026  | 1.18 | 0.24 | 0.13 | 0.47 |
| YPR109W   |        | 2126  | 1797  | 1.18 | 0.24 | 0.13 | 0.47 |
| YPL080C   |        | 2280  | 1928  | 1.18 | 0.24 | 0.13 | 0.47 |
| YKL136W   |        | 1184  | 1001  | 1.18 | 0.24 | 0.13 | 0.47 |
| YLR017W   | MEU1   | 6302  | 5330  | 1.18 | 0.24 | 0.13 | 0.47 |
| YDL146W   |        | 1698  | 1436  | 1.18 | 0.24 | 0.13 | 0.47 |
| YER174C   | GRX4   | 9871  | 8349  | 1.18 | 0.24 | 0.13 | 0.47 |
| YGL108C   |        | 5661  | 4788  | 1.18 | 0.24 | 0.13 | 0.47 |
| YHR065C   | RRP3   | 2632  | 2226  | 1.18 | 0.24 | 0.13 | 0.47 |
| YMR135W-A |        | 3969  | 3357  | 1.18 | 0.24 | 0.13 | 0.47 |
| YAR050W   | FLO1   | 1984  | 1678  | 1.18 | 0.24 | 0.13 | 0.47 |
| YHR173C   |        | 1118  | 946   | 1.18 | 0.24 | 0.13 | 0.47 |
| YDL032W   |        | 2235  | 1891  | 1.18 | 0.24 | 0.13 | 0.47 |
| YDR517W   | GRH1   | 3457  | 2925  | 1.18 | 0.24 | 0.13 | 0.47 |
| YDL029W   | ARP2   | 8476  | 7171  | 1.18 | 0.24 | 0.13 | 0.47 |
| YLR232W   |        | 2293  | 1940  | 1.18 | 0.24 | 0.13 | 0.47 |
| YNL214W   | PEX17  | 3650  | 3089  | 1.18 | 0.24 | 0.13 | 0.47 |
| YEL019C   | MMS21  | 688   | 582   | 1.18 | 0.24 | 0.13 | 0.47 |
| YLR422W   |        | 2253  | 1907  | 1.18 | 0.24 | 0.13 | 0.47 |
| YNL180C   | RHO5   | 14243 | 12057 | 1.18 | 0.24 | 0.13 | 0.47 |
| YMR245W   |        | 2174  | 1840  | 1.18 | 0.24 | 0.13 | 0.47 |
| YDL167C   | NRP1   | 21316 | 18047 | 1.18 | 0.24 | 0.13 | 0.46 |
| YPL145C   | KES1   | 11636 | 9854  | 1.18 | 0.24 | 0.13 | 0.46 |
| YCR080W   |        | 1170  | 991   | 1.18 | 0.24 | 0.13 | 0.46 |
| YGR098C   | ESP1   | 6619  | 5606  | 1.18 | 0.24 | 0.13 | 0.46 |
| YFL019C   |        | 779   | 660   | 1.18 | 0.24 | 0.13 | 0.46 |
| YLR275W   | SMD2   | 4720  | 3999  | 1.18 | 0.24 | 0.13 | 0.46 |

|           |        |       |       |      |      |      |      |
|-----------|--------|-------|-------|------|------|------|------|
| YLR009W   |        | 12180 | 10319 | 1.18 | 0.24 | 0.13 | 0.46 |
| YDL179W   | PCL9   | 15478 | 13115 | 1.18 | 0.24 | 0.13 | 0.46 |
| YGR035C   |        | 1087  | 921   | 1.18 | 0.24 | 0.13 | 0.46 |
| YMR158W-A |        | 983   | 833   | 1.18 | 0.24 | 0.13 | 0.46 |
| YOL029C   |        | 5113  | 4333  | 1.18 | 0.24 | 0.13 | 0.46 |
| YOR329C   | SCD5   | 4863  | 4121  | 1.18 | 0.24 | 0.13 | 0.46 |
| YBR061C   |        | 17906 | 15175 | 1.18 | 0.24 | 0.13 | 0.46 |
| YGR126W   |        | 1877  | 1591  | 1.18 | 0.24 | 0.13 | 0.46 |
| YKL068W   | NUP100 | 9791  | 8300  | 1.18 | 0.24 | 0.13 | 0.46 |
| YDR545W   | YRF1-1 | 3295  | 2793  | 1.18 | 0.24 | 0.13 | 0.46 |
| YGR077C   | PEX8   | 10185 | 8634  | 1.18 | 0.24 | 0.13 | 0.46 |
| YJR029W   |        | 7997  | 6780  | 1.18 | 0.24 | 0.13 | 0.46 |
| YML100W-A |        | 1341  | 1137  | 1.18 | 0.24 | 0.13 | 0.46 |
| YDR409W   |        | 2457  | 2083  | 1.18 | 0.24 | 0.13 | 0.46 |
| YNL313C   |        | 13204 | 11197 | 1.18 | 0.24 | 0.13 | 0.46 |
| YBR206W   |        | 3981  | 3376  | 1.18 | 0.24 | 0.13 | 0.46 |
| YBL069W   | AST1   | 2674  | 2268  | 1.18 | 0.24 | 0.13 | 0.46 |
| YLR023C   |        | 3954  | 3354  | 1.18 | 0.24 | 0.12 | 0.45 |
| YGL209W   | MIG2   | 607   | 515   | 1.18 | 0.24 | 0.12 | 0.45 |
| YGL254W   | FZF1   | 7061  | 5991  | 1.18 | 0.24 | 0.12 | 0.45 |
| YBR215W   | HPC2   | 12428 | 10545 | 1.18 | 0.24 | 0.12 | 0.45 |
| YPL191C   |        | 2342  | 1987  | 1.18 | 0.24 | 0.12 | 0.45 |
| YLR254C   |        | 6168  | 5234  | 1.18 | 0.24 | 0.12 | 0.45 |
| YKL215C   |        | 2753  | 2337  | 1.18 | 0.24 | 0.12 | 0.45 |
| YHR205W   | SCH9   | 775   | 658   | 1.18 | 0.24 | 0.12 | 0.45 |
| YJL037W   |        | 519   | 441   | 1.18 | 0.24 | 0.12 | 0.45 |
| YIL066C   | RNR3   | 5066  | 4301  | 1.18 | 0.24 | 0.12 | 0.45 |
| YNL145W   | MFA2   | 910   | 773   | 1.18 | 0.24 | 0.12 | 0.45 |
| YPR182W   | SMX3   | 5334  | 4529  | 1.18 | 0.24 | 0.12 | 0.45 |
| YHR110W   | ERP5   | 5418  | 4600  | 1.18 | 0.24 | 0.12 | 0.45 |
| YMR192W   |        | 1963  | 1667  | 1.18 | 0.24 | 0.12 | 0.45 |
| YDR386W   | MUS81  | 2489  | 2114  | 1.18 | 0.24 | 0.12 | 0.45 |
| YER089C   | PTC2   | 1512  | 1284  | 1.18 | 0.24 | 0.12 | 0.45 |
| YGR034W   | RPL26B | 26630 | 22617 | 1.18 | 0.24 | 0.12 | 0.45 |
| YJR030C   |        | 3692  | 3136  | 1.18 | 0.24 | 0.12 | 0.45 |
| YMR151W   | YIM2   | 1382  | 1174  | 1.18 | 0.24 | 0.12 | 0.45 |



|           |       |       |       |      |      |      |      |
|-----------|-------|-------|-------|------|------|------|------|
| YLR260W   | LCB5  | 6604  | 5610  | 1.18 | 0.24 | 0.12 | 0.45 |
| YOR207C   | RET1  | 14666 | 12459 | 1.18 | 0.24 | 0.12 | 0.45 |
| YOR308C   | SNU66 | 1388  | 1179  | 1.18 | 0.23 | 0.12 | 0.45 |
| YAL067C   | SEO1  | 634   | 539   | 1.18 | 0.23 | 0.12 | 0.45 |
| YGL136C   |       | 1564  | 1329  | 1.18 | 0.23 | 0.12 | 0.45 |
| YNL234W   |       | 3195  | 2715  | 1.18 | 0.23 | 0.12 | 0.44 |
| YML052W   | SUR7  | 43115 | 36643 | 1.18 | 0.23 | 0.12 | 0.44 |
| YOR262W   |       | 11001 | 9350  | 1.18 | 0.23 | 0.12 | 0.44 |
| YOL041C   |       | 14653 | 12455 | 1.18 | 0.23 | 0.12 | 0.44 |
| YFL054C   |       | 1357  | 1154  | 1.18 | 0.23 | 0.12 | 0.44 |
| YFR019W   | FAB1  | 2485  | 2113  | 1.18 | 0.23 | 0.12 | 0.44 |
| YOR032C   | HMS1  | 1043  | 887   | 1.18 | 0.23 | 0.12 | 0.44 |
| YPR186C   | PZF1  | 2495  | 2122  | 1.18 | 0.23 | 0.12 | 0.44 |
| YEL061C   | CIN8  | 2915  | 2480  | 1.18 | 0.23 | 0.12 | 0.44 |
| YDL154W   | MSH5  | 1332  | 1133  | 1.18 | 0.23 | 0.12 | 0.44 |
| YDR160W   | SSY1  | 1675  | 1425  | 1.18 | 0.23 | 0.12 | 0.44 |
| YDL245C   | HXT15 | 1322  | 1125  | 1.18 | 0.23 | 0.12 | 0.44 |
| YIL137C   |       | 4715  | 4013  | 1.17 | 0.23 | 0.12 | 0.44 |
| YMR118C   |       | 3360  | 2860  | 1.17 | 0.23 | 0.12 | 0.44 |
| YPL259C   | APM1  | 9878  | 8408  | 1.17 | 0.23 | 0.12 | 0.44 |
| YHR170W   | NMD3  | 5003  | 4259  | 1.17 | 0.23 | 0.12 | 0.44 |
| YLR395C   | COX8  | 13121 | 11170 | 1.17 | 0.23 | 0.12 | 0.44 |
| YPL140C   | MKK2  | 13470 | 11467 | 1.17 | 0.23 | 0.12 | 0.44 |
| YIL068C   | SEC6  | 4647  | 3956  | 1.17 | 0.23 | 0.12 | 0.44 |
| YOR135C   |       | 18284 | 15567 | 1.17 | 0.23 | 0.12 | 0.44 |
| YJR064W   | CCT5  | 14493 | 12341 | 1.17 | 0.23 | 0.12 | 0.43 |
| YGL248W   | PDE1  | 9516  | 8104  | 1.17 | 0.23 | 0.12 | 0.43 |
| YCR093W   | CDC39 | 1390  | 1184  | 1.17 | 0.23 | 0.12 | 0.43 |
| YOR389W   |       | 3054  | 2601  | 1.17 | 0.23 | 0.12 | 0.43 |
| YML097C   | VPS9  | 6299  | 5365  | 1.17 | 0.23 | 0.12 | 0.43 |
| YBR188C   | NTC20 | 2312  | 1969  | 1.17 | 0.23 | 0.12 | 0.43 |
| YJL206C-A |       | 3150  | 2683  | 1.17 | 0.23 | 0.12 | 0.43 |
| YNR061C   |       | 5591  | 4763  | 1.17 | 0.23 | 0.12 | 0.43 |
| YGR096W   |       | 5811  | 4951  | 1.17 | 0.23 | 0.12 | 0.43 |
| YNR021W   |       | 16663 | 14198 | 1.17 | 0.23 | 0.12 | 0.43 |
| YNL127W   |       | 1733  | 1477  | 1.17 | 0.23 | 0.12 | 0.43 |

|         |       |       |       |      |      |      |      |
|---------|-------|-------|-------|------|------|------|------|
| YER158C |       | 2745  | 2339  | 1.17 | 0.23 | 0.12 | 0.43 |
| YML063W | RPS1B | 25467 | 21700 | 1.17 | 0.23 | 0.12 | 0.43 |
| YJR055W | HIT1  | 1044  | 890   | 1.17 | 0.23 | 0.12 | 0.43 |
| YMR125W | STO1  | 6156  | 5246  | 1.17 | 0.23 | 0.12 | 0.43 |
| YGL204C |       | 8298  | 7072  | 1.17 | 0.23 | 0.12 | 0.43 |
| YHR060W | VMA22 | 2848  | 2427  | 1.17 | 0.23 | 0.12 | 0.43 |
| YBL089W |       | 1522  | 1297  | 1.17 | 0.23 | 0.12 | 0.43 |
| YOR394W |       | 1033  | 881   | 1.17 | 0.23 | 0.12 | 0.43 |
| YPR049C |       | 3861  | 3291  | 1.17 | 0.23 | 0.12 | 0.43 |
| YJR106W | ECM27 | 3096  | 2640  | 1.17 | 0.23 | 0.12 | 0.43 |
| YMR068W |       | 1237  | 1055  | 1.17 | 0.23 | 0.12 | 0.43 |
| YOL049W | GSH2  | 3777  | 3221  | 1.17 | 0.23 | 0.12 | 0.43 |
| YNL244C | SUI1  | 17996 | 15347 | 1.17 | 0.23 | 0.12 | 0.43 |
| YHR001W |       | 5414  | 4617  | 1.17 | 0.23 | 0.12 | 0.43 |
| YCR064C |       | 1887  | 1609  | 1.17 | 0.23 | 0.12 | 0.43 |
| YBR022W |       | 3780  | 3224  | 1.17 | 0.23 | 0.12 | 0.43 |
| YDR018C |       | 1202  | 1025  | 1.17 | 0.23 | 0.12 | 0.43 |
| YNL025C | SSN8  | 2033  | 1734  | 1.17 | 0.23 | 0.12 | 0.43 |
| YER129W | PAK1  | 2808  | 2396  | 1.17 | 0.23 | 0.12 | 0.42 |
| YLR192C | HCR1  | 15785 | 13472 | 1.17 | 0.23 | 0.12 | 0.42 |
| YER139C |       | 4154  | 3546  | 1.17 | 0.23 | 0.12 | 0.42 |
| YGL255W | ZRT1  | 2872  | 2452  | 1.17 | 0.23 | 0.12 | 0.42 |
| YJL221C | FSP2  | 816   | 697   | 1.17 | 0.23 | 0.12 | 0.42 |
| YFLO63W |       | 1322  | 1129  | 1.17 | 0.23 | 0.12 | 0.42 |
| YMR309C | NIP1  | 10385 | 8870  | 1.17 | 0.23 | 0.12 | 0.42 |
| YCR028C | FEN2  | 4649  | 3971  | 1.17 | 0.23 | 0.12 | 0.42 |
| YNL254C |       | 1647  | 1407  | 1.17 | 0.23 | 0.12 | 0.42 |
| YML094W | GIM5  | 6939  | 5927  | 1.17 | 0.23 | 0.12 | 0.42 |
| YBR095C |       | 6103  | 5213  | 1.17 | 0.23 | 0.11 | 0.42 |
| YHR025W | THR1  | 3340  | 2853  | 1.17 | 0.23 | 0.11 | 0.42 |
| YLR437C |       | 4301  | 3674  | 1.17 | 0.23 | 0.11 | 0.42 |
| YLR328W |       | 6227  | 5320  | 1.17 | 0.23 | 0.11 | 0.42 |
| YDL119C |       | 11650 | 9954  | 1.17 | 0.23 | 0.11 | 0.42 |
| YOL112W | MSB4  | 1777  | 1519  | 1.17 | 0.23 | 0.11 | 0.41 |
| YOR292C |       | 9855  | 8424  | 1.17 | 0.23 | 0.11 | 0.41 |
| YNR025C |       | 2634  | 2252  | 1.17 | 0.23 | 0.11 | 0.41 |

|         |      |       |       |      |      |      |      |
|---------|------|-------|-------|------|------|------|------|
| YHR011W |      | 2236  | 1912  | 1.17 | 0.23 | 0.11 | 0.41 |
| YLR044C | PDC1 | 14109 | 12064 | 1.17 | 0.23 | 0.11 | 0.41 |
| YDL045C | FAD1 | 4001  | 3422  | 1.17 | 0.23 | 0.11 | 0.41 |
| YOR009W |      | 719   | 615   | 1.17 | 0.23 | 0.11 | 0.41 |
| YBR262C |      | 6719  | 5748  | 1.17 | 0.23 | 0.11 | 0.41 |
| YHR149C |      | 2586  | 2213  | 1.17 | 0.22 | 0.11 | 0.41 |
| YCR086W |      | 12312 | 10534 | 1.17 | 0.22 | 0.11 | 0.41 |
| YBR220C |      | 3400  | 2909  | 1.17 | 0.22 | 0.11 | 0.41 |
| YMR200W | ROT1 | 7636  | 6534  | 1.17 | 0.22 | 0.11 | 0.41 |
| YNL205C |      | 725   | 620   | 1.17 | 0.22 | 0.11 | 0.41 |
| YJR152W | DAL5 | 3759  | 3218  | 1.17 | 0.22 | 0.11 | 0.41 |
| YKR019C | IRS4 | 1293  | 1107  | 1.17 | 0.22 | 0.11 | 0.41 |
| YMR319C | FET4 | 5747  | 4920  | 1.17 | 0.22 | 0.11 | 0.41 |
| YIR021W | MRS1 | 5128  | 4390  | 1.17 | 0.22 | 0.11 | 0.41 |
| YIL035C | CKA1 | 3601  | 3083  | 1.17 | 0.22 | 0.11 | 0.41 |
| YOR078W |      | 10961 | 9385  | 1.17 | 0.22 | 0.11 | 0.41 |
| YNL058C |      | 12521 | 10721 | 1.17 | 0.22 | 0.11 | 0.41 |
| YML065W | ORC1 | 4216  | 3610  | 1.17 | 0.22 | 0.11 | 0.41 |
| YGL118C |      | 585   | 501   | 1.17 | 0.22 | 0.11 | 0.41 |
| YJR068W | RFC2 | 4783  | 4096  | 1.17 | 0.22 | 0.11 | 0.41 |
| YER096W | SHC1 | 1947  | 1667  | 1.17 | 0.22 | 0.11 | 0.40 |
| YDR066C |      | 2306  | 1975  | 1.17 | 0.22 | 0.11 | 0.40 |
| YLL038C | ENT4 | 2633  | 2255  | 1.17 | 0.22 | 0.11 | 0.40 |
| YOR241W |      | 2928  | 2508  | 1.17 | 0.22 | 0.11 | 0.40 |
| YIL130W |      | 4413  | 3780  | 1.17 | 0.22 | 0.11 | 0.40 |
| YPL200W |      | 576   | 493   | 1.17 | 0.22 | 0.11 | 0.40 |
| YIR003W |      | 10085 | 8640  | 1.17 | 0.22 | 0.11 | 0.40 |
| YPL101W |      | 4477  | 3836  | 1.17 | 0.22 | 0.11 | 0.40 |
| YGR193C | PDX1 | 5989  | 5132  | 1.17 | 0.22 | 0.11 | 0.40 |
| YKL017C | HCS1 | 3684  | 3157  | 1.17 | 0.22 | 0.11 | 0.40 |
| YOR145C |      | 30519 | 26154 | 1.17 | 0.22 | 0.11 | 0.40 |
| YOR269W | PAC1 | 3379  | 2896  | 1.17 | 0.22 | 0.11 | 0.40 |
| YLL057C |      | 2446  | 2096  | 1.17 | 0.22 | 0.11 | 0.40 |
| YGL178W | MPT5 | 843   | 723   | 1.17 | 0.22 | 0.11 | 0.40 |
| YGL064C |      | 827   | 709   | 1.17 | 0.22 | 0.11 | 0.40 |
| YMR113W |      | 3379  | 2897  | 1.17 | 0.22 | 0.11 | 0.40 |

|           |        |       |       |      |      |      |      |
|-----------|--------|-------|-------|------|------|------|------|
| YHR030C   | SLT2   | 9422  | 8077  | 1.17 | 0.22 | 0.11 | 0.40 |
| YPL074W   | YTA6   | 6986  | 5989  | 1.17 | 0.22 | 0.11 | 0.40 |
| YLR333C   | RPS25B | 25498 | 21861 | 1.17 | 0.22 | 0.11 | 0.40 |
| YJR153W   | PGU1   | 930   | 797   | 1.17 | 0.22 | 0.11 | 0.40 |
| YBL070C   |        | 4742  | 4066  | 1.17 | 0.22 | 0.11 | 0.40 |
| YKL214C   |        | 5308  | 4552  | 1.17 | 0.22 | 0.11 | 0.40 |
| YLR410W   | VIP1   | 2853  | 2447  | 1.17 | 0.22 | 0.11 | 0.40 |
| YCL045C   |        | 349   | 299   | 1.17 | 0.22 | 0.11 | 0.40 |
| YDR011W   | SNQ2   | 649   | 557   | 1.17 | 0.22 | 0.11 | 0.40 |
| YIRO33W   | MGA2   | 4433  | 3803  | 1.17 | 0.22 | 0.11 | 0.40 |
| YMR059W   | SEN15  | 3062  | 2627  | 1.17 | 0.22 | 0.11 | 0.40 |
| YOR169C   |        | 4178  | 3584  | 1.17 | 0.22 | 0.11 | 0.40 |
| YBL077W   |        | 4195  | 3600  | 1.17 | 0.22 | 0.11 | 0.39 |
| YOL063C   |        | 1217  | 1044  | 1.17 | 0.22 | 0.11 | 0.39 |
| YEL059C-A | SOM1   | 2928  | 2513  | 1.17 | 0.22 | 0.11 | 0.39 |
| YCR084C   | TUP1   | 8499  | 7294  | 1.17 | 0.22 | 0.11 | 0.39 |
| YGL202W   | ARO8   | 18362 | 15760 | 1.17 | 0.22 | 0.11 | 0.39 |
| YOR096W   | RPS7A  | 19802 | 16998 | 1.16 | 0.22 | 0.11 | 0.39 |
| YGL012W   | ERG4   | 10573 | 9076  | 1.16 | 0.22 | 0.11 | 0.39 |
| YCL062W   |        | 1937  | 1663  | 1.16 | 0.22 | 0.11 | 0.39 |
| YER037W   |        | 3777  | 3243  | 1.16 | 0.22 | 0.11 | 0.39 |
| YDL108W   | KIN28  | 4004  | 3438  | 1.16 | 0.22 | 0.11 | 0.39 |
| YMR234W   | RNH1   | 1345  | 1155  | 1.16 | 0.22 | 0.11 | 0.39 |
| YMR130W   |        | 1226  | 1053  | 1.16 | 0.22 | 0.11 | 0.39 |
| YNL004W   | HRB1   | 28335 | 24338 | 1.16 | 0.22 | 0.11 | 0.39 |
| YDR159W   | SAC3   | 5290  | 4545  | 1.16 | 0.22 | 0.11 | 0.39 |
| YOL027C   |        | 11259 | 9674  | 1.16 | 0.22 | 0.11 | 0.39 |
| YMR098C   |        | 2584  | 2220  | 1.16 | 0.22 | 0.11 | 0.39 |
| YNL130C   | CPT1   | 14107 | 12123 | 1.16 | 0.22 | 0.11 | 0.39 |
| YOR177C   |        | 1405  | 1208  | 1.16 | 0.22 | 0.11 | 0.39 |
| YKL053W   |        | 2465  | 2119  | 1.16 | 0.22 | 0.11 | 0.38 |
| YLL022C   | HIF1   | 5653  | 4860  | 1.16 | 0.22 | 0.11 | 0.38 |
| YBL045C   | COR1   | 9296  | 7994  | 1.16 | 0.22 | 0.11 | 0.38 |
| YBR143C   | SUP45  | 27496 | 23645 | 1.16 | 0.22 | 0.11 | 0.38 |
| YLR279W   |        | 934   | 803   | 1.16 | 0.22 | 0.11 | 0.38 |
| YAL010C   | MDM10  | 3158  | 2716  | 1.16 | 0.22 | 0.11 | 0.38 |

|          |        |       |       |      |      |      |      |
|----------|--------|-------|-------|------|------|------|------|
| YGR269W  |        | 723   | 622   | 1.16 | 0.22 | 0.11 | 0.38 |
| YDR205W  |        | 2130  | 1832  | 1.16 | 0.22 | 0.10 | 0.38 |
| YGR116W  | SPT6   | 1306  | 1123  | 1.16 | 0.22 | 0.10 | 0.38 |
| YJL020C  |        | 7558  | 6502  | 1.16 | 0.22 | 0.10 | 0.38 |
| YBR203W  |        | 4007  | 3447  | 1.16 | 0.22 | 0.10 | 0.38 |
| YGR191W  | HIP1   | 8843  | 7608  | 1.16 | 0.22 | 0.10 | 0.38 |
| YJR074W  | MOG1   | 7508  | 6459  | 1.16 | 0.22 | 0.10 | 0.38 |
| YPL235W  | RVB2   | 14679 | 12629 | 1.16 | 0.22 | 0.10 | 0.38 |
| YDL030W  | PRP9   | 675   | 581   | 1.16 | 0.22 | 0.10 | 0.38 |
| YPR106W  | ISR1   | 4097  | 3525  | 1.16 | 0.22 | 0.10 | 0.38 |
| YHR102W  | NRK1   | 8442  | 7263  | 1.16 | 0.22 | 0.10 | 0.38 |
| YOR143C  | THI80  | 15496 | 13333 | 1.16 | 0.22 | 0.10 | 0.38 |
| YLR367W  | RPS22B | 35132 | 30236 | 1.16 | 0.22 | 0.10 | 0.38 |
| YDR469W  |        | 2276  | 1959  | 1.16 | 0.22 | 0.10 | 0.38 |
| YBL042C  | FUI1   | 12633 | 10875 | 1.16 | 0.22 | 0.10 | 0.38 |
| YLR329W  | REC102 | 897   | 772   | 1.16 | 0.22 | 0.10 | 0.38 |
| YCRO97WB |        | 664   | 572   | 1.16 | 0.22 | 0.10 | 0.38 |
| YNR054C  |        | 14215 | 12238 | 1.16 | 0.22 | 0.10 | 0.38 |
| YGR013W  | SNU71  | 6342  | 5460  | 1.16 | 0.22 | 0.10 | 0.38 |
| YDL079C  | MRK1   | 2757  | 2374  | 1.16 | 0.22 | 0.10 | 0.38 |
| YPL157W  |        | 2425  | 2088  | 1.16 | 0.22 | 0.10 | 0.38 |
| YER015W  | FAA2   | 919   | 791   | 1.16 | 0.22 | 0.10 | 0.38 |
| YKR023W  |        | 7321  | 6304  | 1.16 | 0.22 | 0.10 | 0.38 |
| YMR106C  | YKU80  | 1288  | 1109  | 1.16 | 0.22 | 0.10 | 0.38 |
| YDL051W  | YLA1   | 14086 | 12132 | 1.16 | 0.22 | 0.10 | 0.37 |
| YKR102W  | FLO10  | 509   | 438   | 1.16 | 0.22 | 0.10 | 0.37 |
| YBR098W  | MMS4   | 1308  | 1127  | 1.16 | 0.22 | 0.10 | 0.37 |
| YHR070W  |        | 13504 | 11633 | 1.16 | 0.22 | 0.10 | 0.37 |
| YILO98C  | FMC1   | 6384  | 5500  | 1.16 | 0.22 | 0.10 | 0.37 |
| YMR048W  |        | 6142  | 5292  | 1.16 | 0.21 | 0.10 | 0.37 |
| YLR262C  | YPT6   | 13157 | 11336 | 1.16 | 0.21 | 0.10 | 0.37 |
| YGR177C  | ATF2   | 4941  | 4257  | 1.16 | 0.21 | 0.10 | 0.37 |
| YBR246W  |        | 8124  | 7001  | 1.16 | 0.21 | 0.10 | 0.37 |
| YMR003W  |        | 2678  | 2308  | 1.16 | 0.21 | 0.10 | 0.37 |
| YPR086W  | SUA7   | 16339 | 14083 | 1.16 | 0.21 | 0.10 | 0.37 |
| YJR067C  | YAE1   | 2920  | 2517  | 1.16 | 0.21 | 0.10 | 0.37 |

|         |        |       |       |      |      |      |      |
|---------|--------|-------|-------|------|------|------|------|
| YJL150W |        | 1614  | 1392  | 1.16 | 0.21 | 0.10 | 0.37 |
| YNL022C |        | 12878 | 11103 | 1.16 | 0.21 | 0.10 | 0.37 |
| YGL227W | TIN1   | 1468  | 1266  | 1.16 | 0.21 | 0.10 | 0.37 |
| YKL203C | TOR2   | 2569  | 2215  | 1.16 | 0.21 | 0.10 | 0.37 |
| YDL021W | GPM2   | 543   | 468   | 1.16 | 0.21 | 0.10 | 0.37 |
| YKL170W | MRPL38 | 10239 | 8830  | 1.16 | 0.21 | 0.10 | 0.37 |
| YMR162C |        | 688   | 593   | 1.16 | 0.21 | 0.10 | 0.37 |
| YCL073C |        | 7409  | 6390  | 1.16 | 0.21 | 0.10 | 0.37 |
| YGR127W |        | 1829  | 1578  | 1.16 | 0.21 | 0.10 | 0.37 |
| YGL088W |        | 983   | 848   | 1.16 | 0.21 | 0.10 | 0.37 |
| YLR235C |        | 3382  | 2918  | 1.16 | 0.21 | 0.10 | 0.37 |
| YPR016C | TIF6   | 20443 | 17638 | 1.16 | 0.21 | 0.10 | 0.37 |
| YCRO49C |        | 1440  | 1242  | 1.16 | 0.21 | 0.10 | 0.37 |
| YLR026C | SED5   | 6548  | 5650  | 1.16 | 0.21 | 0.10 | 0.37 |
| YDR419W | RAD30  | 5748  | 4960  | 1.16 | 0.21 | 0.10 | 0.37 |
| YNL179C |        | 3783  | 3264  | 1.16 | 0.21 | 0.10 | 0.36 |
| YPL227C | ALG5   | 17951 | 15490 | 1.16 | 0.21 | 0.10 | 0.36 |
| YJR122W | CAF17  | 1293  | 1116  | 1.16 | 0.21 | 0.10 | 0.36 |
| YMR229C | RRP5   | 2592  | 2237  | 1.16 | 0.21 | 0.10 | 0.36 |
| YDL191W | RPL35A | 41532 | 35846 | 1.16 | 0.21 | 0.10 | 0.36 |
| YMR082C |        | 494   | 426   | 1.16 | 0.21 | 0.10 | 0.36 |
| YDR207C | UME6   | 1936  | 1671  | 1.16 | 0.21 | 0.10 | 0.36 |
| YNL128W | TEP1   | 1661  | 1434  | 1.16 | 0.21 | 0.10 | 0.36 |
| YPL018W | CTF19  | 3162  | 2730  | 1.16 | 0.21 | 0.10 | 0.36 |
| YOR122C | PFY1   | 13131 | 11340 | 1.16 | 0.21 | 0.10 | 0.36 |
| YHL020C | OPI1   | 7174  | 6197  | 1.16 | 0.21 | 0.10 | 0.36 |
| YPL030W |        | 3174  | 2742  | 1.16 | 0.21 | 0.10 | 0.36 |
| YDR281C |        | 5100  | 4406  | 1.16 | 0.21 | 0.10 | 0.36 |
| YBR297W | MAL33  | 4154  | 3589  | 1.16 | 0.21 | 0.10 | 0.36 |
| YLR455W |        | 5777  | 4991  | 1.16 | 0.21 | 0.10 | 0.36 |
| YIRO40C |        | 1412  | 1220  | 1.16 | 0.21 | 0.10 | 0.36 |
| YML081W |        | 3146  | 2718  | 1.16 | 0.21 | 0.10 | 0.36 |
| YGL193C |        | 2451  | 2118  | 1.16 | 0.21 | 0.10 | 0.36 |
| YMR160W |        | 2700  | 2333  | 1.16 | 0.21 | 0.10 | 0.36 |
| YCRO81W | SRB8   | 3204  | 2769  | 1.16 | 0.21 | 0.10 | 0.36 |
| YKL188C | PXA2   | 753   | 651   | 1.16 | 0.21 | 0.10 | 0.36 |

|         |        |       |       |      |      |      |      |
|---------|--------|-------|-------|------|------|------|------|
| YML062C | MFT1   | 5397  | 4665  | 1.16 | 0.21 | 0.10 | 0.36 |
| YLR372W | SUR4   | 7721  | 6674  | 1.16 | 0.21 | 0.10 | 0.36 |
| YOR090C | PTC5   | 3121  | 2698  | 1.16 | 0.21 | 0.10 | 0.36 |
| YGR018C |        | 4843  | 4188  | 1.16 | 0.21 | 0.10 | 0.35 |
| YDR167W | TAF25  | 11960 | 10343 | 1.16 | 0.21 | 0.10 | 0.35 |
| YGR114C |        | 3444  | 2978  | 1.16 | 0.21 | 0.10 | 0.35 |
| YGR129W | SYF2   | 2558  | 2212  | 1.16 | 0.21 | 0.10 | 0.35 |
| YOR323C | PRO2   | 15098 | 13057 | 1.16 | 0.21 | 0.10 | 0.35 |
| YDR142C | PEX7   | 5523  | 4777  | 1.16 | 0.21 | 0.10 | 0.35 |
| YCL039W |        | 2037  | 1762  | 1.16 | 0.21 | 0.10 | 0.35 |
| YPL153C | RAD53  | 2119  | 1833  | 1.16 | 0.21 | 0.10 | 0.35 |
| YEL027W | CUP5   | 12600 | 10900 | 1.16 | 0.21 | 0.10 | 0.35 |
| YDR300C | PRO1   | 15973 | 13818 | 1.16 | 0.21 | 0.10 | 0.35 |
| YOR383C |        | 1893  | 1638  | 1.16 | 0.21 | 0.10 | 0.35 |
| YGL028C | SCW11  | 9706  | 8397  | 1.16 | 0.21 | 0.10 | 0.35 |
| YLR166C | SEC10  | 2647  | 2290  | 1.16 | 0.21 | 0.10 | 0.35 |
| YOL117W |        | 1121  | 970   | 1.16 | 0.21 | 0.10 | 0.35 |
| YDR451C |        | 7180  | 6213  | 1.16 | 0.21 | 0.10 | 0.35 |
| YIL092W |        | 2614  | 2262  | 1.16 | 0.21 | 0.10 | 0.35 |
| YOR354C |        | 5882  | 5091  | 1.16 | 0.21 | 0.10 | 0.35 |
| YOR286W |        | 11717 | 10141 | 1.16 | 0.21 | 0.10 | 0.35 |
| YDL176W |        | 2588  | 2240  | 1.16 | 0.21 | 0.10 | 0.35 |
| YOL021C | DIS3   | 8082  | 6996  | 1.16 | 0.21 | 0.10 | 0.35 |
| YKL173W | SNU114 | 1073  | 929   | 1.16 | 0.21 | 0.10 | 0.35 |
| YPL245W |        | 5716  | 4948  | 1.16 | 0.21 | 0.10 | 0.35 |
| YLR443W | ECM7   | 4105  | 3554  | 1.16 | 0.21 | 0.10 | 0.35 |
| YDR494W |        | 13074 | 11319 | 1.16 | 0.21 | 0.10 | 0.35 |
| YGL206C | CHC1   | 782   | 677   | 1.16 | 0.21 | 0.10 | 0.35 |
| YNR016C | ACC1   | 2130  | 1844  | 1.16 | 0.21 | 0.10 | 0.35 |
| YJL201W | ECM25  | 3023  | 2617  | 1.15 | 0.21 | 0.10 | 0.35 |
| YBR152W | SPP381 | 3096  | 2681  | 1.15 | 0.21 | 0.10 | 0.35 |
| YAL062W | GDH3   | 1100  | 953   | 1.15 | 0.21 | 0.10 | 0.35 |
| YDR118W | APC4   | 5769  | 4996  | 1.15 | 0.21 | 0.10 | 0.35 |
| YKR071C |        | 18507 | 16028 | 1.15 | 0.21 | 0.10 | 0.35 |
| YHR135C | YCK1   | 2757  | 2388  | 1.15 | 0.21 | 0.10 | 0.35 |
| YEL002C | WBP1   | 16908 | 14643 | 1.15 | 0.21 | 0.10 | 0.35 |

|         |        |       |       |      |      |      |      |
|---------|--------|-------|-------|------|------|------|------|
| YDR302W |        | 10150 | 8791  | 1.15 | 0.21 | 0.10 | 0.35 |
| YBR104W | YMC2   | 11300 | 9787  | 1.15 | 0.21 | 0.09 | 0.35 |
| YOR303W | CPA1   | 12163 | 10535 | 1.15 | 0.21 | 0.09 | 0.34 |
| YOL010W |        | 8582  | 7435  | 1.15 | 0.21 | 0.09 | 0.34 |
| YDR257C | RMS1   | 5414  | 4690  | 1.15 | 0.21 | 0.09 | 0.34 |
| YNL202W | SPS19  | 2410  | 2088  | 1.15 | 0.21 | 0.09 | 0.34 |
| YDR433W |        | 11076 | 9596  | 1.15 | 0.21 | 0.09 | 0.34 |
| YCR014C | POL4   | 2105  | 1824  | 1.15 | 0.21 | 0.09 | 0.34 |
| YNL103W | MET4   | 4573  | 3962  | 1.15 | 0.21 | 0.09 | 0.34 |
| YLR039C | RIC1   | 1660  | 1438  | 1.15 | 0.21 | 0.09 | 0.34 |
| YOL033W | MSE1   | 4614  | 3998  | 1.15 | 0.21 | 0.09 | 0.34 |
| YHR014W | SPO13  | 1103  | 956   | 1.15 | 0.21 | 0.09 | 0.34 |
| YDR229W |        | 3880  | 3362  | 1.15 | 0.21 | 0.09 | 0.34 |
| YGR180C | RNR4   | 16206 | 14045 | 1.15 | 0.21 | 0.09 | 0.34 |
| YPR072W | NOT5   | 5090  | 4411  | 1.15 | 0.21 | 0.09 | 0.34 |
| YMR183C | SSO2   | 17441 | 15117 | 1.15 | 0.21 | 0.09 | 0.34 |
| YHLO47C |        | 4048  | 3509  | 1.15 | 0.21 | 0.09 | 0.34 |
| YPL173W | MRPL40 | 4253  | 3687  | 1.15 | 0.21 | 0.09 | 0.34 |
| YHR018C | ARG4   | 30606 | 26535 | 1.15 | 0.21 | 0.09 | 0.34 |
| YDR135C | YCF1   | 723   | 627   | 1.15 | 0.21 | 0.09 | 0.34 |
| YLL044W |        | 28987 | 25133 | 1.15 | 0.21 | 0.09 | 0.34 |
| YPL171C | OYE3   | 745   | 646   | 1.15 | 0.21 | 0.09 | 0.34 |
| YNL154C | YCK2   | 22342 | 19372 | 1.15 | 0.21 | 0.09 | 0.34 |
| YDR287W |        | 4049  | 3511  | 1.15 | 0.21 | 0.09 | 0.34 |
| YNL053W | MSG5   | 5478  | 4750  | 1.15 | 0.21 | 0.09 | 0.34 |
| YOL096C | COQ3   | 6823  | 5917  | 1.15 | 0.21 | 0.09 | 0.34 |
| YMR193W | MRPL24 | 9177  | 7959  | 1.15 | 0.21 | 0.09 | 0.34 |
| YBL020W | RFT1   | 15848 | 13746 | 1.15 | 0.21 | 0.09 | 0.34 |
| YJL005W | CYR1   | 824   | 715   | 1.15 | 0.21 | 0.09 | 0.34 |
| YILO45W | PIG2   | 2957  | 2565  | 1.15 | 0.21 | 0.09 | 0.34 |
| YDR506C |        | 853   | 740   | 1.15 | 0.21 | 0.09 | 0.34 |
| YOR166C |        | 3375  | 2928  | 1.15 | 0.21 | 0.09 | 0.34 |
| YPL129W | ANC1   | 11665 | 10120 | 1.15 | 0.20 | 0.09 | 0.34 |
| YDR381W | YRA1   | 17995 | 15612 | 1.15 | 0.20 | 0.09 | 0.34 |
| YCRX14W |        | 4187  | 3633  | 1.15 | 0.20 | 0.09 | 0.34 |
| YDR416W | SYF1   | 4179  | 3626  | 1.15 | 0.20 | 0.09 | 0.34 |



|           |        |       |       |      |      |      |      |
|-----------|--------|-------|-------|------|------|------|------|
| YNR009W   |        | 3429  | 2975  | 1.15 | 0.20 | 0.09 | 0.34 |
| YGL123W   | RPS2   | 29541 | 25634 | 1.15 | 0.20 | 0.09 | 0.34 |
| YLR018C   |        | 16262 | 14112 | 1.15 | 0.20 | 0.09 | 0.34 |
| YOR049C   |        | 2715  | 2356  | 1.15 | 0.20 | 0.09 | 0.34 |
| YELO29C   |        | 3803  | 3301  | 1.15 | 0.20 | 0.09 | 0.33 |
| YOR014W   | RTS1   | 1612  | 1399  | 1.15 | 0.20 | 0.09 | 0.33 |
| YDR190C   | RVB1   | 16092 | 13968 | 1.15 | 0.20 | 0.09 | 0.33 |
| YPR192W   | AQY1   | 1068  | 927   | 1.15 | 0.20 | 0.09 | 0.33 |
| YNL169C   | PSD1   | 3990  | 3465  | 1.15 | 0.20 | 0.09 | 0.33 |
| YDL116W   | NUP84  | 10317 | 8959  | 1.15 | 0.20 | 0.09 | 0.33 |
| YDR263C   | DIN7   | 1132  | 983   | 1.15 | 0.20 | 0.09 | 0.33 |
| YLR073C   |        | 19978 | 17350 | 1.15 | 0.20 | 0.09 | 0.33 |
| YJL090C   | DPB11  | 5103  | 4432  | 1.15 | 0.20 | 0.09 | 0.33 |
| YMR138W   | CIN4   | 2627  | 2282  | 1.15 | 0.20 | 0.09 | 0.33 |
| YPL177C   | CUP9   | 12410 | 10780 | 1.15 | 0.20 | 0.09 | 0.33 |
| YDL058W   | USO1   | 7239  | 6288  | 1.15 | 0.20 | 0.09 | 0.33 |
| YHR119W   | SET1   | 7601  | 6603  | 1.15 | 0.20 | 0.09 | 0.33 |
| YER166W   |        | 772   | 671   | 1.15 | 0.20 | 0.09 | 0.33 |
| YFL011W-A |        | 14004 | 12166 | 1.15 | 0.20 | 0.09 | 0.33 |
| YJR073C   | OPI3   | 4900  | 4257  | 1.15 | 0.20 | 0.09 | 0.33 |
| YBL101C   | ECM21  | 429   | 373   | 1.15 | 0.20 | 0.09 | 0.33 |
| YCRX11W   |        | 815   | 708   | 1.15 | 0.20 | 0.09 | 0.33 |
| YMR103C   |        | 1811  | 1574  | 1.15 | 0.20 | 0.09 | 0.33 |
| YBR204C   |        | 1869  | 1624  | 1.15 | 0.20 | 0.09 | 0.33 |
| YCLX06C   |        | 10643 | 9249  | 1.15 | 0.20 | 0.09 | 0.33 |
| YGR091W   | PRP31  | 1634  | 1420  | 1.15 | 0.20 | 0.09 | 0.33 |
| YILO29C   |        | 1191  | 1035  | 1.15 | 0.20 | 0.09 | 0.33 |
| YDR199W   |        | 878   | 763   | 1.15 | 0.20 | 0.09 | 0.33 |
| YGR230W   | BNS1   | 8560  | 7443  | 1.15 | 0.20 | 0.09 | 0.33 |
| YLR167W   | RPS31  | 39470 | 34318 | 1.15 | 0.20 | 0.09 | 0.32 |
| YBL106C   | SRO77  | 1109  | 964   | 1.15 | 0.20 | 0.09 | 0.32 |
| YBR248C   | HIS7   | 5072  | 4410  | 1.15 | 0.20 | 0.09 | 0.32 |
| YGR027C   | RPS25A | 26355 | 22919 | 1.15 | 0.20 | 0.09 | 0.32 |
| YMR287C   | MSU1   | 6386  | 5553  | 1.15 | 0.20 | 0.09 | 0.32 |
| YKL143W   | LTV1   | 17293 | 15043 | 1.15 | 0.20 | 0.09 | 0.32 |
| YPLO75W   | GCR1   | 5102  | 4438  | 1.15 | 0.20 | 0.09 | 0.32 |

|         |        |       |       |      |      |      |      |
|---------|--------|-------|-------|------|------|------|------|
| YDL005C | MED2   | 9423  | 8197  | 1.15 | 0.20 | 0.09 | 0.32 |
| YPR194C |        | 1445  | 1257  | 1.15 | 0.20 | 0.09 | 0.32 |
| YML004C | GLO1   | 11133 | 9685  | 1.15 | 0.20 | 0.09 | 0.32 |
| YOL075C |        | 1524  | 1326  | 1.15 | 0.20 | 0.09 | 0.32 |
| YKL131W |        | 3494  | 3041  | 1.15 | 0.20 | 0.09 | 0.32 |
| YJL141C | YAK1   | 1851  | 1611  | 1.15 | 0.20 | 0.09 | 0.32 |
| YJL137C | GLG2   | 1656  | 1441  | 1.15 | 0.20 | 0.09 | 0.32 |
| YDR140W |        | 15904 | 13844 | 1.15 | 0.20 | 0.09 | 0.32 |
| YER153C | PET122 | 964   | 839   | 1.15 | 0.20 | 0.09 | 0.32 |
| YER108C |        | 2093  | 1822  | 1.15 | 0.20 | 0.09 | 0.32 |
| YOR280C |        | 5587  | 4864  | 1.15 | 0.20 | 0.09 | 0.32 |
| YLR224W |        | 9606  | 8363  | 1.15 | 0.20 | 0.09 | 0.32 |
| YLR346C |        | 1697  | 1477  | 1.15 | 0.20 | 0.09 | 0.32 |
| YGR197C | SNG1   | 3356  | 2922  | 1.15 | 0.20 | 0.09 | 0.32 |
| YPL195W | APL5   | 4391  | 3823  | 1.15 | 0.20 | 0.09 | 0.32 |
| YDR479C |        | 4432  | 3859  | 1.15 | 0.20 | 0.09 | 0.32 |
| YAL059W | ECM1   | 20831 | 18139 | 1.15 | 0.20 | 0.09 | 0.32 |
| YOR336W | KRE5   | 3583  | 3120  | 1.15 | 0.20 | 0.09 | 0.32 |
| YPL047W |        | 3739  | 3256  | 1.15 | 0.20 | 0.09 | 0.32 |
| YOL006C | TOP1   | 5899  | 5137  | 1.15 | 0.20 | 0.09 | 0.32 |
| YLR015W |        | 1880  | 1637  | 1.15 | 0.20 | 0.09 | 0.32 |
| YGL171W | ROK1   | 5501  | 4791  | 1.15 | 0.20 | 0.09 | 0.32 |
| YLR067C | PET309 | 4167  | 3629  | 1.15 | 0.20 | 0.09 | 0.32 |
| YMR252C |        | 1619  | 1410  | 1.15 | 0.20 | 0.09 | 0.32 |
| YER070W | RNR1   | 15941 | 13887 | 1.15 | 0.20 | 0.09 | 0.31 |
| YJL052W | TDH1   | 35524 | 30951 | 1.15 | 0.20 | 0.09 | 0.31 |
| YOL055C | THI20  | 5226  | 4554  | 1.15 | 0.20 | 0.09 | 0.31 |
| YCR101C |        | 2172  | 1893  | 1.15 | 0.20 | 0.09 | 0.31 |
| YDL190C | UFD2   | 379   | 330   | 1.15 | 0.20 | 0.09 | 0.31 |
| YKL180W | RPL17A | 7371  | 6426  | 1.15 | 0.20 | 0.09 | 0.31 |
| YGL042C |        | 3222  | 2809  | 1.15 | 0.20 | 0.09 | 0.31 |
| YER162C | RAD4   | 2694  | 2349  | 1.15 | 0.20 | 0.09 | 0.31 |
| YPR011C |        | 5040  | 4395  | 1.15 | 0.20 | 0.09 | 0.31 |
| YOR309C |        | 21664 | 18891 | 1.15 | 0.20 | 0.09 | 0.31 |
| YPL082C | MOT1   | 11964 | 10434 | 1.15 | 0.20 | 0.09 | 0.31 |
| YER046W |        | 1322  | 1153  | 1.15 | 0.20 | 0.08 | 0.31 |

|         |        |       |       |      |      |      |      |
|---------|--------|-------|-------|------|------|------|------|
| YDL248W | COS7   | 2365  | 2063  | 1.15 | 0.20 | 0.08 | 0.31 |
| YLR294C |        | 9192  | 8019  | 1.15 | 0.20 | 0.08 | 0.31 |
| YNR040W |        | 2581  | 2252  | 1.15 | 0.20 | 0.08 | 0.31 |
| YGL192W | IME4   | 9755  | 8512  | 1.15 | 0.20 | 0.08 | 0.31 |
| YOR180C | DCI1   | 4253  | 3711  | 1.15 | 0.20 | 0.08 | 0.31 |
| YDR370C |        | 5494  | 4795  | 1.15 | 0.20 | 0.08 | 0.31 |
| YDR116C |        | 16454 | 14361 | 1.15 | 0.20 | 0.08 | 0.30 |
| YDR507C | GIN4   | 1493  | 1303  | 1.15 | 0.20 | 0.08 | 0.30 |
| YPL264C |        | 1705  | 1488  | 1.15 | 0.20 | 0.08 | 0.30 |
| YLR061W | RPL22A | 44113 | 38506 | 1.15 | 0.20 | 0.08 | 0.30 |
| YOR339C | UBC11  | 2227  | 1944  | 1.15 | 0.20 | 0.08 | 0.30 |
| YLR240W | VPS34  | 4986  | 4353  | 1.15 | 0.20 | 0.08 | 0.30 |
| YKL162C |        | 1921  | 1677  | 1.15 | 0.20 | 0.08 | 0.30 |
| YDR434W |        | 7882  | 6883  | 1.15 | 0.20 | 0.08 | 0.30 |
| YBR139W |        | 9072  | 7922  | 1.15 | 0.20 | 0.08 | 0.30 |
| YNL187W |        | 1594  | 1392  | 1.15 | 0.20 | 0.08 | 0.30 |
| YELO69C | HXT13  | 2179  | 1903  | 1.15 | 0.20 | 0.08 | 0.30 |
| YJL204C |        | 3173  | 2771  | 1.15 | 0.20 | 0.08 | 0.30 |
| YIL145C |        | 14689 | 12830 | 1.14 | 0.20 | 0.08 | 0.30 |
| YOR016C | ERP4   | 6480  | 5660  | 1.14 | 0.20 | 0.08 | 0.30 |
| YER154W | OXA1   | 15073 | 13167 | 1.14 | 0.20 | 0.08 | 0.30 |
| YLR233C | EST1   | 1448  | 1265  | 1.14 | 0.19 | 0.08 | 0.30 |
| YDL187C |        | 849   | 742   | 1.14 | 0.19 | 0.08 | 0.30 |
| YDL034W |        | 1557  | 1361  | 1.14 | 0.19 | 0.08 | 0.30 |
| YOL103W | ITR2   | 8625  | 7539  | 1.14 | 0.19 | 0.08 | 0.30 |
| YML023C |        | 3923  | 3430  | 1.14 | 0.19 | 0.08 | 0.30 |
| YNL332W | THI12  | 785   | 686   | 1.14 | 0.19 | 0.08 | 0.30 |
| YBR282W | MRPL27 | 8398  | 7342  | 1.14 | 0.19 | 0.08 | 0.30 |
| YDR423C | CAD1   | 5985  | 5234  | 1.14 | 0.19 | 0.08 | 0.29 |
| YHL040C | ARN1   | 3214  | 2811  | 1.14 | 0.19 | 0.08 | 0.29 |
| YBR047W |        | 1774  | 1552  | 1.14 | 0.19 | 0.08 | 0.29 |
| YGR264C | MES1   | 13098 | 11456 | 1.14 | 0.19 | 0.08 | 0.29 |
| YGR293C |        | 4707  | 4117  | 1.14 | 0.19 | 0.08 | 0.29 |
| YKL007W | CAP1   | 8972  | 7849  | 1.14 | 0.19 | 0.08 | 0.29 |
| YML053C |        | 5182  | 4534  | 1.14 | 0.19 | 0.08 | 0.29 |
| YPL176C |        | 9148  | 8004  | 1.14 | 0.19 | 0.08 | 0.29 |

|         |         |       |       |      |      |      |      |
|---------|---------|-------|-------|------|------|------|------|
| YFR015C | GSY1    | 3113  | 2724  | 1.14 | 0.19 | 0.08 | 0.29 |
| YDL153C | SAS10   | 30845 | 26995 | 1.14 | 0.19 | 0.08 | 0.29 |
| YDR094W |         | 2178  | 1906  | 1.14 | 0.19 | 0.08 | 0.29 |
| YOR256C |         | 4007  | 3507  | 1.14 | 0.19 | 0.08 | 0.29 |
| YGL054C | ERV14   | 14011 | 12264 | 1.14 | 0.19 | 0.08 | 0.29 |
| YIL135C |         | 7090  | 6207  | 1.14 | 0.19 | 0.08 | 0.29 |
| YMR175W | SIP18   | 562   | 492   | 1.14 | 0.19 | 0.08 | 0.29 |
| YPR126C |         | 5526  | 4840  | 1.14 | 0.19 | 0.08 | 0.29 |
| YHR075C |         | 2499  | 2189  | 1.14 | 0.19 | 0.08 | 0.29 |
| YDR413C |         | 17117 | 14994 | 1.14 | 0.19 | 0.08 | 0.29 |
| YHR161C | YAP1801 | 3639  | 3188  | 1.14 | 0.19 | 0.08 | 0.29 |
| YJL169W |         | 934   | 818   | 1.14 | 0.19 | 0.08 | 0.29 |
| YDR075W | PPH3    | 4682  | 4102  | 1.14 | 0.19 | 0.08 | 0.29 |
| YMR291W |         | 4749  | 4161  | 1.14 | 0.19 | 0.08 | 0.28 |
| YOR021C |         | 15137 | 13263 | 1.14 | 0.19 | 0.08 | 0.28 |
| YNL088W | TOP2    | 2468  | 2162  | 1.14 | 0.19 | 0.08 | 0.28 |
| YLR114C |         | 2723  | 2386  | 1.14 | 0.19 | 0.08 | 0.28 |
| YCRX10W |         | 2604  | 2282  | 1.14 | 0.19 | 0.08 | 0.28 |
| YMR008C | PLB1    | 10942 | 9588  | 1.14 | 0.19 | 0.08 | 0.28 |
| YLR439W | MRPL4   | 2763  | 2421  | 1.14 | 0.19 | 0.08 | 0.28 |
| YPR111W | DBF20   | 1871  | 1640  | 1.14 | 0.19 | 0.08 | 0.28 |
| YOR238W |         | 9352  | 8196  | 1.14 | 0.19 | 0.08 | 0.28 |
| YMR260C | TIF11   | 20554 | 18013 | 1.14 | 0.19 | 0.08 | 0.28 |
| YJL194W | CDC6    | 1470  | 1288  | 1.14 | 0.19 | 0.08 | 0.28 |
| YER061C | CEM1    | 5478  | 4801  | 1.14 | 0.19 | 0.08 | 0.28 |
| YBL090W | MRP21   | 8802  | 7715  | 1.14 | 0.19 | 0.08 | 0.28 |
| YDR058C | TGL2    | 1359  | 1191  | 1.14 | 0.19 | 0.08 | 0.28 |
| YKL005C |         | 3565  | 3125  | 1.14 | 0.19 | 0.08 | 0.28 |
| YCL017C | NFS1    | 7267  | 6370  | 1.14 | 0.19 | 0.08 | 0.28 |
| YGL209W | MIG2    | 6956  | 6097  | 1.14 | 0.19 | 0.08 | 0.28 |
| YAR027W |         | 895   | 785   | 1.14 | 0.19 | 0.08 | 0.28 |
| YLR087C |         | 936   | 821   | 1.14 | 0.19 | 0.08 | 0.28 |
| YFL047W |         | 8655  | 7588  | 1.14 | 0.19 | 0.08 | 0.28 |
| YBL007C | SLA1    | 7146  | 6265  | 1.14 | 0.19 | 0.08 | 0.28 |
| YDR078C | PUN1    | 5754  | 5045  | 1.14 | 0.19 | 0.08 | 0.28 |
| YBR251W | MRPS5   | 12152 | 10655 | 1.14 | 0.19 | 0.08 | 0.28 |

|         |        |       |       |      |      |      |      |
|---------|--------|-------|-------|------|------|------|------|
| YLR415C |        | 1307  | 1146  | 1.14 | 0.19 | 0.08 | 0.28 |
| YPR071W |        | 4310  | 3781  | 1.14 | 0.19 | 0.08 | 0.28 |
| YOR300W |        | 1784  | 1565  | 1.14 | 0.19 | 0.08 | 0.28 |
| YMR168C | CEP3   | 2346  | 2058  | 1.14 | 0.19 | 0.08 | 0.28 |
| YCR106W |        | 2448  | 2148  | 1.14 | 0.19 | 0.08 | 0.28 |
| YAL069W |        | 830   | 728   | 1.14 | 0.19 | 0.08 | 0.28 |
| YKR090W |        | 2707  | 2375  | 1.14 | 0.19 | 0.08 | 0.28 |
| YDR366C |        | 8987  | 7887  | 1.14 | 0.19 | 0.08 | 0.28 |
| YBR268W | MRPL37 | 8042  | 7059  | 1.14 | 0.19 | 0.08 | 0.28 |
| YBR270C |        | 1292  | 1134  | 1.14 | 0.19 | 0.08 | 0.28 |
| YML124C | TUB3   | 10004 | 8783  | 1.14 | 0.19 | 0.08 | 0.27 |
| YML040W |        | 31811 | 27933 | 1.14 | 0.19 | 0.08 | 0.27 |
| YLR369W | SSQ1   | 3165  | 2779  | 1.14 | 0.19 | 0.08 | 0.27 |
| YLR094C | GIS3   | 3635  | 3192  | 1.14 | 0.19 | 0.08 | 0.27 |
| YJR156C | THI11  | 1787  | 1569  | 1.14 | 0.19 | 0.08 | 0.27 |
| YER024W |        | 2127  | 1868  | 1.14 | 0.19 | 0.08 | 0.27 |
| YML031W | NDC1   | 7580  | 6657  | 1.14 | 0.19 | 0.07 | 0.27 |
| YDR455C |        | 3578  | 3142  | 1.14 | 0.19 | 0.07 | 0.27 |
| YNL199C | GCR2   | 3692  | 3243  | 1.14 | 0.19 | 0.07 | 0.27 |
| YLR273C | PIG1   | 2030  | 1783  | 1.14 | 0.19 | 0.07 | 0.27 |
| YDR292C | SRP101 | 3185  | 2798  | 1.14 | 0.19 | 0.07 | 0.27 |
| YGL008C | PMA1   | 42383 | 37232 | 1.14 | 0.19 | 0.07 | 0.27 |
| YDL094C |        | 3836  | 3370  | 1.14 | 0.19 | 0.07 | 0.27 |
| YEL022W | GEA2   | 4827  | 4241  | 1.14 | 0.19 | 0.07 | 0.27 |
| YER128W |        | 12597 | 11068 | 1.14 | 0.19 | 0.07 | 0.27 |
| YGR140W | CBF2   | 679   | 597   | 1.14 | 0.19 | 0.07 | 0.27 |
| YFL043C |        | 1114  | 979   | 1.14 | 0.19 | 0.07 | 0.27 |
| YNL320W |        | 863   | 758   | 1.14 | 0.19 | 0.07 | 0.27 |
| YPL231W | FAS2   | 10245 | 9003  | 1.14 | 0.19 | 0.07 | 0.27 |
| YDR015C |        | 401   | 352   | 1.14 | 0.19 | 0.07 | 0.27 |
| YGL102C |        | 19265 | 16930 | 1.14 | 0.19 | 0.07 | 0.27 |
| YMR257C | PET111 | 916   | 805   | 1.14 | 0.19 | 0.07 | 0.27 |
| YDR201W | SPC19  | 1370  | 1204  | 1.14 | 0.19 | 0.07 | 0.27 |
| YHR125W |        | 3531  | 3104  | 1.14 | 0.19 | 0.07 | 0.27 |
| YER011W | TIR1   | 474   | 417   | 1.14 | 0.19 | 0.07 | 0.27 |
| YIL103W |        | 12156 | 10686 | 1.14 | 0.19 | 0.07 | 0.27 |

|         |        |       |       |      |      |      |      |
|---------|--------|-------|-------|------|------|------|------|
| YFL026W | STE2   | 1021  | 898   | 1.14 | 0.19 | 0.07 | 0.27 |
| YPR077C |        | 494   | 434   | 1.14 | 0.19 | 0.07 | 0.27 |
| YNR064C |        | 1805  | 1587  | 1.14 | 0.19 | 0.07 | 0.27 |
| YDL217C | TIM22  | 3954  | 3477  | 1.14 | 0.19 | 0.07 | 0.27 |
| YDR474C |        | 2071  | 1822  | 1.14 | 0.18 | 0.07 | 0.26 |
| YLR384C | IKI3   | 1120  | 985   | 1.14 | 0.18 | 0.07 | 0.26 |
| YMR123W | PKR1   | 11244 | 9893  | 1.14 | 0.18 | 0.07 | 0.26 |
| YHR049W |        | 2716  | 2390  | 1.14 | 0.18 | 0.07 | 0.26 |
| YIL057C |        | 2108  | 1855  | 1.14 | 0.18 | 0.07 | 0.26 |
| YGR212W |        | 1832  | 1612  | 1.14 | 0.18 | 0.07 | 0.26 |
| YHR077C | NMD2   | 17050 | 15004 | 1.14 | 0.18 | 0.07 | 0.26 |
| YGL148W | ARO2   | 2221  | 1955  | 1.14 | 0.18 | 0.07 | 0.26 |
| YGR007W | MUQ1   | 14324 | 12606 | 1.14 | 0.18 | 0.07 | 0.26 |
| YEL016C |        | 1763  | 1552  | 1.14 | 0.18 | 0.07 | 0.26 |
| YDR516C |        | 2968  | 2613  | 1.14 | 0.18 | 0.07 | 0.26 |
| YMR042W | ARG80  | 3478  | 3062  | 1.14 | 0.18 | 0.07 | 0.26 |
| YOR251C |        | 3255  | 2866  | 1.14 | 0.18 | 0.07 | 0.26 |
| YMR070W | MOT3   | 6055  | 5332  | 1.14 | 0.18 | 0.07 | 0.26 |
| YHR211W | FLO5   | 4547  | 4005  | 1.14 | 0.18 | 0.07 | 0.26 |
| YOR298W |        | 1960  | 1727  | 1.14 | 0.18 | 0.07 | 0.26 |
| YOR139C |        | 1431  | 1261  | 1.14 | 0.18 | 0.07 | 0.26 |
| YCR003W | MRPL32 | 10793 | 9509  | 1.14 | 0.18 | 0.07 | 0.26 |
| YNR046W |        | 14388 | 12677 | 1.13 | 0.18 | 0.07 | 0.26 |
| YJR092W | BUD4   | 1344  | 1184  | 1.13 | 0.18 | 0.07 | 0.26 |
| YFL061W |        | 2794  | 2462  | 1.13 | 0.18 | 0.07 | 0.26 |
| YKL072W | STB6   | 3301  | 2909  | 1.13 | 0.18 | 0.07 | 0.26 |
| YJL203W | PRP21  | 3054  | 2691  | 1.13 | 0.18 | 0.07 | 0.26 |
| YOR340C | RPA43  | 11092 | 9774  | 1.13 | 0.18 | 0.07 | 0.26 |
| YCR054C | CTR86  | 2712  | 2390  | 1.13 | 0.18 | 0.07 | 0.25 |
| YDL018C | ERP3   | 10267 | 9048  | 1.13 | 0.18 | 0.07 | 0.25 |
| YPL132W | COX11  | 15709 | 13845 | 1.13 | 0.18 | 0.07 | 0.25 |
| YIRO28W | DAL4   | 1228  | 1082  | 1.13 | 0.18 | 0.07 | 0.25 |
| YBR144C |        | 1161  | 1023  | 1.13 | 0.18 | 0.07 | 0.25 |
| YBL051C |        | 5166  | 4554  | 1.13 | 0.18 | 0.07 | 0.25 |
| YMR325W |        | 1472  | 1298  | 1.13 | 0.18 | 0.07 | 0.25 |
| YCR004C | YCP4   | 17617 | 15532 | 1.13 | 0.18 | 0.07 | 0.25 |

|         |        |       |       |      |      |      |      |
|---------|--------|-------|-------|------|------|------|------|
| YIL114C | POR2   | 6693  | 5901  | 1.13 | 0.18 | 0.07 | 0.25 |
| YBR151W | APD1   | 17967 | 15841 | 1.13 | 0.18 | 0.07 | 0.25 |
| YCR087W |        | 5280  | 4655  | 1.13 | 0.18 | 0.07 | 0.25 |
| YOL077C |        | 37795 | 33328 | 1.13 | 0.18 | 0.07 | 0.25 |
| YJL186W | MNN5   | 830   | 732   | 1.13 | 0.18 | 0.07 | 0.25 |
| YHL001W | RPL14B | 31467 | 27759 | 1.13 | 0.18 | 0.07 | 0.25 |
| YNL220W | ADE12  | 17366 | 15321 | 1.13 | 0.18 | 0.07 | 0.25 |
| YGR270W | YTA7   | 4252  | 3751  | 1.13 | 0.18 | 0.07 | 0.25 |
| YDL206W |        | 1266  | 1117  | 1.13 | 0.18 | 0.07 | 0.25 |
| YHR036W |        | 8958  | 7905  | 1.13 | 0.18 | 0.07 | 0.25 |
| YDR003W |        | 1676  | 1479  | 1.13 | 0.18 | 0.07 | 0.25 |
| YLR085C | ARP6   | 16808 | 14833 | 1.13 | 0.18 | 0.07 | 0.25 |
| YPL172C | COX10  | 14975 | 13217 | 1.13 | 0.18 | 0.07 | 0.25 |
| YNL027W | CRZ1   | 3062  | 2703  | 1.13 | 0.18 | 0.07 | 0.25 |
| YDL163W |        | 1825  | 1611  | 1.13 | 0.18 | 0.07 | 0.25 |
| YHR162W |        | 19356 | 17088 | 1.13 | 0.18 | 0.07 | 0.25 |
| YPL068C |        | 10038 | 8865  | 1.13 | 0.18 | 0.07 | 0.24 |
| YFR031C | SMC2   | 745   | 658   | 1.13 | 0.18 | 0.07 | 0.24 |
| YGL113W |        | 3758  | 3319  | 1.13 | 0.18 | 0.07 | 0.24 |
| YKR045C |        | 1608  | 1420  | 1.13 | 0.18 | 0.07 | 0.24 |
| YIL107C | PFK26  | 3353  | 2962  | 1.13 | 0.18 | 0.07 | 0.24 |
| YGL075C | MPS2   | 3517  | 3107  | 1.13 | 0.18 | 0.07 | 0.24 |
| YLR418C | CDC73  | 8555  | 7557  | 1.13 | 0.18 | 0.07 | 0.24 |
| YGL257C | MNT2   | 7198  | 6358  | 1.13 | 0.18 | 0.07 | 0.24 |
| YIL156W | UBP7   | 5616  | 4961  | 1.13 | 0.18 | 0.07 | 0.24 |
| YCR059C |        | 6226  | 5501  | 1.13 | 0.18 | 0.07 | 0.24 |
| YPL134C |        | 3675  | 3247  | 1.13 | 0.18 | 0.07 | 0.24 |
| YDR529C | QCR7   | 17288 | 15277 | 1.13 | 0.18 | 0.07 | 0.24 |
| YNL195C |        | 1183  | 1045  | 1.13 | 0.18 | 0.07 | 0.24 |
| YER023W | PRO3   | 3367  | 2976  | 1.13 | 0.18 | 0.07 | 0.24 |
| YBR054W | YRO2   | 1876  | 1658  | 1.13 | 0.18 | 0.07 | 0.24 |
| YNL268W | LYP1   | 13859 | 12252 | 1.13 | 0.18 | 0.07 | 0.24 |
| YML046W | PRP39  | 3271  | 2892  | 1.13 | 0.18 | 0.07 | 0.24 |
| YDR364C | CDC40  | 2052  | 1814  | 1.13 | 0.18 | 0.07 | 0.24 |
| YGR181W | TIM13  | 7755  | 6856  | 1.13 | 0.18 | 0.07 | 0.24 |
| YLR135W |        | 4550  | 4022  | 1.13 | 0.18 | 0.07 | 0.24 |

|         |        |       |       |      |      |      |      |
|---------|--------|-------|-------|------|------|------|------|
| YOL081W | IRA2   | 701   | 620   | 1.13 | 0.18 | 0.07 | 0.24 |
| YOR042W |        | 2130  | 1883  | 1.13 | 0.18 | 0.07 | 0.24 |
| YNL290W | RFC3   | 6338  | 5604  | 1.13 | 0.18 | 0.07 | 0.24 |
| YOR059C |        | 1604  | 1418  | 1.13 | 0.18 | 0.07 | 0.24 |
| YJR079W |        | 759   | 671   | 1.13 | 0.18 | 0.06 | 0.24 |
| YJL177W | RPL17B | 30720 | 27176 | 1.13 | 0.18 | 0.06 | 0.23 |
| YKL091C |        | 2782  | 2461  | 1.13 | 0.18 | 0.06 | 0.23 |
| YER133W | GLC7   | 21211 | 18765 | 1.13 | 0.18 | 0.06 | 0.23 |
| YEL021W | URA3   | 6101  | 5398  | 1.13 | 0.18 | 0.06 | 0.23 |
| YBR225W |        | 4514  | 3994  | 1.13 | 0.18 | 0.06 | 0.23 |
| YNL009W | IDP3   | 1187  | 1050  | 1.13 | 0.18 | 0.06 | 0.23 |
| YPR147C |        | 1943  | 1719  | 1.13 | 0.18 | 0.06 | 0.23 |
| YNL165W |        | 4328  | 3830  | 1.13 | 0.18 | 0.06 | 0.23 |
| YGR196C |        | 2079  | 1840  | 1.13 | 0.18 | 0.06 | 0.23 |
| YFL001W | DEG1   | 4856  | 4297  | 1.13 | 0.18 | 0.06 | 0.23 |
| YML050W |        | 6226  | 5510  | 1.13 | 0.18 | 0.06 | 0.23 |
| YKLO19W | RAM2   | 5110  | 4523  | 1.13 | 0.18 | 0.06 | 0.23 |
| YCRO66W | RAD18  | 2772  | 2454  | 1.13 | 0.18 | 0.06 | 0.23 |
| YBR182C | SMP1   | 1021  | 904   | 1.13 | 0.18 | 0.06 | 0.23 |
| YGL043W | DST1   | 4670  | 4134  | 1.13 | 0.18 | 0.06 | 0.23 |
| YHR047C | AAP1'  | 1528  | 1353  | 1.13 | 0.18 | 0.06 | 0.23 |
| YHL022C | SPO11  | 826   | 731   | 1.13 | 0.18 | 0.06 | 0.23 |
| YDR182W | CDC1   | 17260 | 15282 | 1.13 | 0.18 | 0.06 | 0.23 |
| YDL162C |        | 500   | 443   | 1.13 | 0.18 | 0.06 | 0.23 |
| YOR195W | SLK19  | 7867  | 6966  | 1.13 | 0.18 | 0.06 | 0.23 |
| YMR220W | ERG8   | 5340  | 4728  | 1.13 | 0.18 | 0.06 | 0.23 |
| YBL073W |        | 994   | 880   | 1.13 | 0.18 | 0.06 | 0.23 |
| YGL061C | DUO1   | 9326  | 8258  | 1.13 | 0.18 | 0.06 | 0.23 |
| YLR230W |        | 7281  | 6448  | 1.13 | 0.18 | 0.06 | 0.23 |
| YOR126C | IAH1   | 3075  | 2723  | 1.13 | 0.18 | 0.06 | 0.23 |
| YMR127C | SAS2   | 2614  | 2316  | 1.13 | 0.17 | 0.06 | 0.23 |
| YDR343C | HXT6   | 627   | 556   | 1.13 | 0.17 | 0.06 | 0.23 |
| YOR311C |        | 8124  | 7199  | 1.13 | 0.17 | 0.06 | 0.23 |
| YAL047C | SPC72  | 3228  | 2860  | 1.13 | 0.17 | 0.06 | 0.23 |
| YER064C |        | 576   | 510   | 1.13 | 0.17 | 0.06 | 0.23 |
| YLR177W |        | 2826  | 2504  | 1.13 | 0.17 | 0.06 | 0.23 |



|           |        |       |       |      |      |      |      |
|-----------|--------|-------|-------|------|------|------|------|
| YBL052C   | SAS3   | 9846  | 8726  | 1.13 | 0.17 | 0.06 | 0.22 |
| YOL045W   |        | 3198  | 2834  | 1.13 | 0.17 | 0.06 | 0.22 |
| YPR200C   | ARR2   | 671   | 595   | 1.13 | 0.17 | 0.06 | 0.22 |
| YBL048W   |        | 2071  | 1836  | 1.13 | 0.17 | 0.06 | 0.22 |
| YGR057C   | LST7   | 7170  | 6357  | 1.13 | 0.17 | 0.06 | 0.22 |
| YPL116W   | HOS3   | 3949  | 3502  | 1.13 | 0.17 | 0.06 | 0.22 |
| YIL121W   |        | 3833  | 3400  | 1.13 | 0.17 | 0.06 | 0.22 |
| YOR008C   | SLG1   | 7979  | 7078  | 1.13 | 0.17 | 0.06 | 0.22 |
| YHR087W   |        | 13374 | 11863 | 1.13 | 0.17 | 0.06 | 0.22 |
| YPRO03C   |        | 2409  | 2137  | 1.13 | 0.17 | 0.06 | 0.22 |
| YGL093W   | SPC105 | 1200  | 1065  | 1.13 | 0.17 | 0.06 | 0.22 |
| YDR289C   | RTT103 | 2931  | 2601  | 1.13 | 0.17 | 0.06 | 0.22 |
| YOL082W   |        | 9702  | 8610  | 1.13 | 0.17 | 0.06 | 0.22 |
| YHR167W   |        | 2891  | 2566  | 1.13 | 0.17 | 0.06 | 0.22 |
| YLR180W   | SAM1   | 11461 | 10172 | 1.13 | 0.17 | 0.06 | 0.22 |
| YPRO68C   | HOS1   | 4216  | 3742  | 1.13 | 0.17 | 0.06 | 0.22 |
| YLR427W   |        | 2880  | 2557  | 1.13 | 0.17 | 0.06 | 0.22 |
| YJR006W   | HYS2   | 18548 | 16466 | 1.13 | 0.17 | 0.06 | 0.22 |
| YIL112W   |        | 3148  | 2795  | 1.13 | 0.17 | 0.06 | 0.22 |
| YAL065C-A |        | 1440  | 1278  | 1.13 | 0.17 | 0.06 | 0.22 |
| YOR171C   | LCB4   | 998   | 886   | 1.13 | 0.17 | 0.06 | 0.22 |
| YOR202W   | HIS3   | 26353 | 23398 | 1.13 | 0.17 | 0.06 | 0.22 |
| YFLO24C   | EPL1   | 473   | 420   | 1.13 | 0.17 | 0.06 | 0.21 |
| YNL113W   | RPC19  | 17922 | 15914 | 1.13 | 0.17 | 0.06 | 0.21 |
| YKR083C   |        | 5262  | 4673  | 1.13 | 0.17 | 0.06 | 0.21 |
| YNL051W   |        | 10070 | 8943  | 1.13 | 0.17 | 0.06 | 0.21 |
| YDL084W   | SUB2   | 11995 | 10653 | 1.13 | 0.17 | 0.06 | 0.21 |
| YPRO46W   | MCM16  | 9385  | 8336  | 1.13 | 0.17 | 0.06 | 0.21 |
| YDR141C   | DOP1   | 2921  | 2595  | 1.13 | 0.17 | 0.06 | 0.21 |
| YBR112C   | CYC8   | 6187  | 5497  | 1.13 | 0.17 | 0.06 | 0.21 |
| YKL030W   |        | 2790  | 2479  | 1.13 | 0.17 | 0.06 | 0.21 |
| YGR033C   |        | 17820 | 15833 | 1.13 | 0.17 | 0.06 | 0.21 |
| YLL045C   | RPL8B  | 13761 | 12227 | 1.13 | 0.17 | 0.06 | 0.21 |
| YDR460W   | TFB3   | 3591  | 3191  | 1.13 | 0.17 | 0.06 | 0.21 |
| YPL179W   | PPQ1   | 1426  | 1267  | 1.13 | 0.17 | 0.06 | 0.21 |
| YOR033C   | DHS1   | 1139  | 1012  | 1.13 | 0.17 | 0.06 | 0.21 |

|           |        |       |       |      |      |      |      |
|-----------|--------|-------|-------|------|------|------|------|
| YPL035C   |        | 2112  | 1877  | 1.13 | 0.17 | 0.06 | 0.21 |
| YNL194C   |        | 1524  | 1355  | 1.12 | 0.17 | 0.06 | 0.21 |
| YBR195C   | MSI1   | 9822  | 8732  | 1.12 | 0.17 | 0.06 | 0.21 |
| YGL249W   | ZIP2   | 3267  | 2905  | 1.12 | 0.17 | 0.06 | 0.21 |
| YML016C   | PPZ1   | 9427  | 8382  | 1.12 | 0.17 | 0.06 | 0.21 |
| YGL129C   |        | 10783 | 9588  | 1.12 | 0.17 | 0.06 | 0.21 |
| YOR306C   |        | 2429  | 2160  | 1.12 | 0.17 | 0.06 | 0.21 |
| YDR325W   | YCG1   | 824   | 733   | 1.12 | 0.17 | 0.06 | 0.21 |
| YJR050W   | ISY1   | 5427  | 4826  | 1.12 | 0.17 | 0.06 | 0.21 |
| YLR387C   |        | 7934  | 7056  | 1.12 | 0.17 | 0.06 | 0.21 |
| YIL125W   | KGD1   | 6365  | 5661  | 1.12 | 0.17 | 0.06 | 0.21 |
| YHR068W   | DYS1   | 1862  | 1656  | 1.12 | 0.17 | 0.06 | 0.21 |
| YMR317W   |        | 1064  | 946   | 1.12 | 0.17 | 0.06 | 0.21 |
| YLR362W   | STE11  | 2602  | 2314  | 1.12 | 0.17 | 0.06 | 0.21 |
| YOL155C   |        | 3389  | 3015  | 1.12 | 0.17 | 0.06 | 0.20 |
| YAL043C-A |        | 8012  | 7129  | 1.12 | 0.17 | 0.06 | 0.20 |
| YCRO30C   |        | 3573  | 3180  | 1.12 | 0.17 | 0.06 | 0.20 |
| YBL084C   | CDC27  | 1445  | 1286  | 1.12 | 0.17 | 0.06 | 0.20 |
| YKL038W   | RGT1   | 801   | 713   | 1.12 | 0.17 | 0.06 | 0.20 |
| YMR279C   |        | 1362  | 1212  | 1.12 | 0.17 | 0.06 | 0.20 |
| YMR088C   |        | 1992  | 1773  | 1.12 | 0.17 | 0.06 | 0.20 |
| YDR522C   | SPS2   | 686   | 611   | 1.12 | 0.17 | 0.06 | 0.20 |
| YJL133W   | MRS3   | 4789  | 4264  | 1.12 | 0.17 | 0.06 | 0.20 |
| YER014W   | HEM14  | 1981  | 1764  | 1.12 | 0.17 | 0.05 | 0.20 |
| YBR181C   | RPS6B  | 44600 | 39723 | 1.12 | 0.17 | 0.05 | 0.20 |
| YBR157C   | ICS2   | 1552  | 1382  | 1.12 | 0.17 | 0.05 | 0.20 |
| YDR185C   |        | 1167  | 1040  | 1.12 | 0.17 | 0.05 | 0.20 |
| YBR084C-A | RPL19A | 25902 | 23074 | 1.12 | 0.17 | 0.05 | 0.20 |
| YDR016C   |        | 7393  | 6586  | 1.12 | 0.17 | 0.05 | 0.20 |
| YER095W   | RAD51  | 2541  | 2264  | 1.12 | 0.17 | 0.05 | 0.20 |
| YPR117W   |        | 984   | 877   | 1.12 | 0.17 | 0.05 | 0.20 |
| YHL010C   |        | 2921  | 2603  | 1.12 | 0.17 | 0.05 | 0.20 |
| YFR038W   |        | 7245  | 6456  | 1.12 | 0.17 | 0.05 | 0.20 |
| YGR101W   |        | 6005  | 5353  | 1.12 | 0.17 | 0.05 | 0.19 |
| YOR083W   |        | 556   | 496   | 1.12 | 0.17 | 0.05 | 0.19 |
| YGL224C   |        | 9896  | 8823  | 1.12 | 0.17 | 0.05 | 0.19 |

|           |       |       |       |      |      |      |      |
|-----------|-------|-------|-------|------|------|------|------|
| YOR378W   |       | 1306  | 1164  | 1.12 | 0.17 | 0.05 | 0.19 |
| YPL040C   | ISM1  | 3516  | 3135  | 1.12 | 0.17 | 0.05 | 0.19 |
| YGR031W   |       | 2797  | 2494  | 1.12 | 0.17 | 0.05 | 0.19 |
| YKL074C   | MUD2  | 9122  | 8135  | 1.12 | 0.17 | 0.05 | 0.19 |
| YPR024W   | YME1  | 9280  | 8276  | 1.12 | 0.17 | 0.05 | 0.19 |
| YLR458W   |       | 3776  | 3368  | 1.12 | 0.16 | 0.05 | 0.19 |
| YMR219W   | ESC1  | 660   | 589   | 1.12 | 0.16 | 0.05 | 0.19 |
| YJL006C   | CTK2  | 10297 | 9185  | 1.12 | 0.16 | 0.05 | 0.19 |
| YGR006W   | PRP18 | 1301  | 1161  | 1.12 | 0.16 | 0.05 | 0.19 |
| YGR041W   | BUD9  | 4252  | 3793  | 1.12 | 0.16 | 0.05 | 0.19 |
| YDL215C   | GDH2  | 1456  | 1299  | 1.12 | 0.16 | 0.05 | 0.19 |
| YLR442C   | SIR3  | 964   | 860   | 1.12 | 0.16 | 0.05 | 0.19 |
| YDR313C   | PIB1  | 3550  | 3168  | 1.12 | 0.16 | 0.05 | 0.19 |
| YDL151C   |       | 11632 | 10380 | 1.12 | 0.16 | 0.05 | 0.19 |
| YNL330C   | RPD3  | 6142  | 5481  | 1.12 | 0.16 | 0.05 | 0.19 |
| YPR036W   | VMA13 | 25249 | 22532 | 1.12 | 0.16 | 0.05 | 0.19 |
| YLR058C   | SHM2  | 5288  | 4719  | 1.12 | 0.16 | 0.05 | 0.19 |
| YCR065W   | HCM1  | 5722  | 5107  | 1.12 | 0.16 | 0.05 | 0.19 |
| YOR179C   |       | 8807  | 7860  | 1.12 | 0.16 | 0.05 | 0.19 |
| YNL066W   | SUN4  | 29526 | 26356 | 1.12 | 0.16 | 0.05 | 0.19 |
| YPR084W   |       | 6444  | 5753  | 1.12 | 0.16 | 0.05 | 0.19 |
| YML095C-A |       | 6078  | 5426  | 1.12 | 0.16 | 0.05 | 0.19 |
| YKL048C   | ELM1  | 1717  | 1533  | 1.12 | 0.16 | 0.05 | 0.19 |
| YBR069C   | VAP1  | 13963 | 12467 | 1.12 | 0.16 | 0.05 | 0.19 |
| YKL050C   |       | 1307  | 1167  | 1.12 | 0.16 | 0.05 | 0.19 |
| YMR104C   | YPK2  | 1697  | 1515  | 1.12 | 0.16 | 0.05 | 0.18 |
| YPR140W   |       | 3014  | 2692  | 1.12 | 0.16 | 0.05 | 0.18 |
| YMR167W   | MLH1  | 3710  | 3314  | 1.12 | 0.16 | 0.05 | 0.18 |
| YBR094W   |       | 3172  | 2833  | 1.12 | 0.16 | 0.05 | 0.18 |
| YDR273W   |       | 971   | 867   | 1.12 | 0.16 | 0.05 | 0.18 |
| YLR116W   | MSL5  | 3579  | 3197  | 1.12 | 0.16 | 0.05 | 0.18 |
| YNR023W   | SNF12 | 4116  | 3677  | 1.12 | 0.16 | 0.05 | 0.18 |
| YBR258C   |       | 3597  | 3213  | 1.12 | 0.16 | 0.05 | 0.18 |
| YOL089C   | HAL9  | 2081  | 1859  | 1.12 | 0.16 | 0.05 | 0.18 |
| YPR163C   | TIF3  | 1284  | 1147  | 1.12 | 0.16 | 0.05 | 0.18 |
| YMR302C   | PRP12 | 4004  | 3578  | 1.12 | 0.16 | 0.05 | 0.18 |

|         |       |       |       |      |      |      |      |
|---------|-------|-------|-------|------|------|------|------|
| YEL077C |       | 1930  | 1725  | 1.12 | 0.16 | 0.05 | 0.18 |
| YIL026C | IRR1  | 7854  | 7020  | 1.12 | 0.16 | 0.05 | 0.18 |
| YKL177W |       | 917   | 820   | 1.12 | 0.16 | 0.05 | 0.18 |
| YCR107W | AAD3  | 2813  | 2515  | 1.12 | 0.16 | 0.05 | 0.18 |
| YGR215W |       | 9005  | 8050  | 1.12 | 0.16 | 0.05 | 0.18 |
| YNL005C | MRP7  | 9219  | 8242  | 1.12 | 0.16 | 0.05 | 0.18 |
| YPR085C |       | 726   | 649   | 1.12 | 0.16 | 0.05 | 0.18 |
| YGR233C | PHO81 | 1390  | 1243  | 1.12 | 0.16 | 0.05 | 0.18 |
| YFL018C | LPD1  | 22163 | 19815 | 1.12 | 0.16 | 0.05 | 0.18 |
| YMR258C |       | 719   | 643   | 1.12 | 0.16 | 0.05 | 0.18 |
| YNR072W | HXT17 | 2709  | 2423  | 1.12 | 0.16 | 0.05 | 0.18 |
| YGL191W | COX13 | 8865  | 7928  | 1.12 | 0.16 | 0.05 | 0.18 |
| YPR005C | HAL1  | 823   | 736   | 1.12 | 0.16 | 0.05 | 0.18 |
| YMR064W | AEP1  | 8180  | 7316  | 1.12 | 0.16 | 0.05 | 0.18 |
| YER170W | ADK2  | 9643  | 8625  | 1.12 | 0.16 | 0.05 | 0.18 |
| YJL016W |       | 1442  | 1290  | 1.12 | 0.16 | 0.05 | 0.18 |
| YPR093C |       | 2215  | 1981  | 1.12 | 0.16 | 0.05 | 0.18 |
| YMR195W |       | 7079  | 6332  | 1.12 | 0.16 | 0.05 | 0.18 |
| YHR002W |       | 6030  | 5395  | 1.12 | 0.16 | 0.05 | 0.18 |
| YCR063W |       | 4651  | 4161  | 1.12 | 0.16 | 0.05 | 0.17 |
| YIL169C |       | 6101  | 5459  | 1.12 | 0.16 | 0.05 | 0.17 |
| YMR157C |       | 4213  | 3770  | 1.12 | 0.16 | 0.05 | 0.17 |
| YNR001C | CIT1  | 10932 | 9783  | 1.12 | 0.16 | 0.05 | 0.17 |
| YKL020C | SPT23 | 489   | 438   | 1.12 | 0.16 | 0.05 | 0.17 |
| YDR452W |       | 1162  | 1040  | 1.12 | 0.16 | 0.05 | 0.17 |
| YLR112W |       | 2242  | 2007  | 1.12 | 0.16 | 0.05 | 0.17 |
| YOR128C | ADE2  | 3224  | 2886  | 1.12 | 0.16 | 0.05 | 0.17 |
| YHL018W |       | 1422  | 1273  | 1.12 | 0.16 | 0.05 | 0.17 |
| YHR092C | HXT4  | 5900  | 5283  | 1.12 | 0.16 | 0.05 | 0.17 |
| YBR289W | SNF5  | 2257  | 2021  | 1.12 | 0.16 | 0.05 | 0.17 |
| YHL042W |       | 1506  | 1349  | 1.12 | 0.16 | 0.05 | 0.17 |
| YCL024W |       | 7189  | 6438  | 1.12 | 0.16 | 0.05 | 0.17 |
| YKR072C | SIS2  | 5884  | 5269  | 1.12 | 0.16 | 0.05 | 0.17 |
| YER134C |       | 6595  | 5906  | 1.12 | 0.16 | 0.05 | 0.17 |
| YNL329C | PEX6  | 10560 | 9458  | 1.12 | 0.16 | 0.05 | 0.17 |
| YIL143C | SSL2  | 14399 | 12896 | 1.12 | 0.16 | 0.05 | 0.17 |

|           |       |       |       |      |      |      |      |
|-----------|-------|-------|-------|------|------|------|------|
| YNL218W   |       | 3762  | 3371  | 1.12 | 0.16 | 0.05 | 0.17 |
| YDR444W   |       | 3997  | 3582  | 1.12 | 0.16 | 0.05 | 0.17 |
| YEL062W   | NPR2  | 1840  | 1649  | 1.12 | 0.16 | 0.05 | 0.17 |
| YMR136W   | GAT2  | 3036  | 2721  | 1.12 | 0.16 | 0.05 | 0.17 |
| YLR242C   | ARV1  | 7862  | 7046  | 1.12 | 0.16 | 0.05 | 0.17 |
| YILO64W   |       | 14894 | 13351 | 1.12 | 0.16 | 0.05 | 0.17 |
| YLR306W   | UBC12 | 5281  | 4734  | 1.12 | 0.16 | 0.05 | 0.16 |
| YGL232W   |       | 13699 | 12281 | 1.12 | 0.16 | 0.05 | 0.16 |
| YCR019W   | MAK32 | 7420  | 6654  | 1.12 | 0.16 | 0.04 | 0.16 |
| YAL054C   | ACS1  | 623   | 559   | 1.12 | 0.16 | 0.04 | 0.16 |
| YBR015C   | MNN2  | 6130  | 5497  | 1.12 | 0.16 | 0.04 | 0.16 |
| YBR288C   | APM3  | 5057  | 4535  | 1.12 | 0.16 | 0.04 | 0.16 |
| YPL045W   | VPS16 | 2370  | 2126  | 1.11 | 0.16 | 0.04 | 0.16 |
| YDR524C   |       | 5623  | 5043  | 1.11 | 0.16 | 0.04 | 0.16 |
| YMR205C   | PFK2  | 3705  | 3323  | 1.11 | 0.16 | 0.04 | 0.16 |
| YBR025C   |       | 16816 | 15084 | 1.11 | 0.16 | 0.04 | 0.16 |
| YJL162C   |       | 3528  | 3165  | 1.11 | 0.16 | 0.04 | 0.16 |
| YBR194W   |       | 2310  | 2073  | 1.11 | 0.16 | 0.04 | 0.16 |
| YDR457W   | TOM1  | 995   | 893   | 1.11 | 0.16 | 0.04 | 0.16 |
| YBR161W   |       | 1308  | 1174  | 1.11 | 0.16 | 0.04 | 0.16 |
| YPL142C   |       | 3508  | 3148  | 1.11 | 0.16 | 0.04 | 0.16 |
| YLR375W   | STP3  | 934   | 838   | 1.11 | 0.16 | 0.04 | 0.16 |
| YBL101W-B |       | 1457  | 1308  | 1.11 | 0.16 | 0.04 | 0.16 |
| YBR008C   | FLR1  | 999   | 897   | 1.11 | 0.16 | 0.04 | 0.16 |
| YLR220W   | CCC1  | 3687  | 3310  | 1.11 | 0.16 | 0.04 | 0.16 |
| YPR029C   | APL4  | 6201  | 5568  | 1.11 | 0.16 | 0.04 | 0.16 |
| YKL054C   |       | 427   | 383   | 1.11 | 0.16 | 0.04 | 0.16 |
| YJL032W   |       | 2462  | 2211  | 1.11 | 0.16 | 0.04 | 0.16 |
| YJL012C   |       | 16727 | 15022 | 1.11 | 0.16 | 0.04 | 0.16 |
| YBR187W   |       | 6793  | 6101  | 1.11 | 0.15 | 0.04 | 0.15 |
| YIL073C   | SPO22 | 857   | 770   | 1.11 | 0.15 | 0.04 | 0.15 |
| YOL137W   |       | 4309  | 3871  | 1.11 | 0.15 | 0.04 | 0.15 |
| YNR017W   | MAS6  | 10957 | 9844  | 1.11 | 0.15 | 0.04 | 0.15 |
| YMR119W-A |       | 861   | 774   | 1.11 | 0.15 | 0.04 | 0.15 |
| YKL087C   | CYT2  | 7260  | 6525  | 1.11 | 0.15 | 0.04 | 0.15 |
| YBL091C   | MAP2  | 17696 | 15904 | 1.11 | 0.15 | 0.04 | 0.15 |

|         |        |       |       |      |      |      |      |
|---------|--------|-------|-------|------|------|------|------|
| YJL213W |        | 5956  | 5353  | 1.11 | 0.15 | 0.04 | 0.15 |
| YIL167W |        | 5757  | 5174  | 1.11 | 0.15 | 0.04 | 0.15 |
| YDL080C | THI3   | 4748  | 4268  | 1.11 | 0.15 | 0.04 | 0.15 |
| YDR044W | HEM13  | 3642  | 3274  | 1.11 | 0.15 | 0.04 | 0.15 |
| YBR073W | RDH54  | 8947  | 8044  | 1.11 | 0.15 | 0.04 | 0.15 |
| YBR014C |        | 5263  | 4732  | 1.11 | 0.15 | 0.04 | 0.15 |
| YBL015W | ACH1   | 1671  | 1502  | 1.11 | 0.15 | 0.04 | 0.15 |
| YCR102C |        | 2428  | 2183  | 1.11 | 0.15 | 0.04 | 0.15 |
| YOR037W | CYC2   | 3762  | 3383  | 1.11 | 0.15 | 0.04 | 0.15 |
| YDR216W | ADR1   | 7668  | 6896  | 1.11 | 0.15 | 0.04 | 0.15 |
| YMR141C |        | 2573  | 2314  | 1.11 | 0.15 | 0.04 | 0.15 |
| YML129C | COX14  | 9229  | 8301  | 1.11 | 0.15 | 0.04 | 0.15 |
| YBR130C | SHE3   | 6358  | 5719  | 1.11 | 0.15 | 0.04 | 0.15 |
| YNL032W | SIW14  | 19461 | 17505 | 1.11 | 0.15 | 0.04 | 0.15 |
| YGL260W |        | 3214  | 2891  | 1.11 | 0.15 | 0.04 | 0.15 |
| YHR088W |        | 2779  | 2500  | 1.11 | 0.15 | 0.04 | 0.15 |
| YFR033C | QCR6   | 17703 | 15925 | 1.11 | 0.15 | 0.04 | 0.15 |
| YGR070W | ROM1   | 1452  | 1306  | 1.11 | 0.15 | 0.04 | 0.15 |
| YKL015W | PUT3   | 1248  | 1123  | 1.11 | 0.15 | 0.04 | 0.15 |
| YDR183W |        | 3124  | 2811  | 1.11 | 0.15 | 0.04 | 0.14 |
| YCRX04W |        | 8865  | 7979  | 1.11 | 0.15 | 0.04 | 0.14 |
| YCR031C | RPS14A | 8715  | 7844  | 1.11 | 0.15 | 0.04 | 0.14 |
| YKL011C | CCE1   | 4111  | 3700  | 1.11 | 0.15 | 0.04 | 0.14 |
| YDL122W | UBP1   | 8627  | 7767  | 1.11 | 0.15 | 0.04 | 0.14 |
| YOL135C | MED7   | 2144  | 1930  | 1.11 | 0.15 | 0.04 | 0.14 |
| YPR105C |        | 6667  | 6004  | 1.11 | 0.15 | 0.04 | 0.14 |
| YKL012W | PRP40  | 5553  | 5002  | 1.11 | 0.15 | 0.04 | 0.14 |
| YOR224C | RPB8   | 17502 | 15766 | 1.11 | 0.15 | 0.04 | 0.14 |
| YDR074W | TPS2   | 10014 | 9021  | 1.11 | 0.15 | 0.04 | 0.14 |
| YJR124C |        | 6063  | 5462  | 1.11 | 0.15 | 0.04 | 0.14 |
| YDR127W | ARO1   | 2875  | 2590  | 1.11 | 0.15 | 0.04 | 0.14 |
| YJR109C | CPA2   | 1157  | 1042  | 1.11 | 0.15 | 0.04 | 0.14 |
| YHR061C | GIC1   | 5785  | 5213  | 1.11 | 0.15 | 0.04 | 0.14 |
| YJL176C | SWI3   | 4976  | 4484  | 1.11 | 0.15 | 0.04 | 0.14 |
| YPL136W |        | 1945  | 1753  | 1.11 | 0.15 | 0.04 | 0.14 |
| YDL067C | COX9   | 9316  | 8396  | 1.11 | 0.15 | 0.04 | 0.14 |

|           |       |       |       |      |      |      |      |
|-----------|-------|-------|-------|------|------|------|------|
| YNL274C   |       | 2135  | 1925  | 1.11 | 0.15 | 0.04 | 0.14 |
| YDR429C   | TIF35 | 29074 | 26213 | 1.11 | 0.15 | 0.04 | 0.13 |
| YKRO64W   |       | 1623  | 1463  | 1.11 | 0.15 | 0.04 | 0.13 |
| YDR305C   | HNT2  | 5567  | 5019  | 1.11 | 0.15 | 0.04 | 0.13 |
| YLL036C   | PRP19 | 5695  | 5136  | 1.11 | 0.15 | 0.04 | 0.13 |
| YIRO15W   | RPR2  | 1215  | 1096  | 1.11 | 0.15 | 0.04 | 0.13 |
| YLR221C   |       | 6545  | 5903  | 1.11 | 0.15 | 0.04 | 0.13 |
| YNRO28W   | CPR8  | 9013  | 8129  | 1.11 | 0.15 | 0.04 | 0.13 |
| YJL007C   |       | 904   | 815   | 1.11 | 0.15 | 0.04 | 0.13 |
| YMR140W   |       | 4253  | 3836  | 1.11 | 0.15 | 0.04 | 0.13 |
| YOR205C   |       | 11941 | 10771 | 1.11 | 0.15 | 0.04 | 0.13 |
| YGR228W   |       | 8938  | 8062  | 1.11 | 0.15 | 0.04 | 0.13 |
| YPL007C   |       | 8474  | 7644  | 1.11 | 0.15 | 0.04 | 0.13 |
| YCR041W   |       | 10001 | 9022  | 1.11 | 0.15 | 0.04 | 0.13 |
| YFL035C-A |       | 31198 | 28145 | 1.11 | 0.15 | 0.04 | 0.13 |
| YHR005C   | GPA1  | 15757 | 14215 | 1.11 | 0.15 | 0.04 | 0.13 |
| YOR141C   | ARP8  | 7546  | 6808  | 1.11 | 0.15 | 0.04 | 0.13 |
| YMR310C   |       | 14789 | 13343 | 1.11 | 0.15 | 0.04 | 0.13 |
| YOL042W   |       | 10353 | 9341  | 1.11 | 0.15 | 0.04 | 0.13 |
| YPL228W   | CET1  | 2751  | 2482  | 1.11 | 0.15 | 0.04 | 0.13 |
| YLR034C   | SMF3  | 13840 | 12490 | 1.11 | 0.15 | 0.04 | 0.13 |
| YIL157C   |       | 10519 | 9496  | 1.11 | 0.15 | 0.04 | 0.13 |
| YCR100C   |       | 730   | 659   | 1.11 | 0.15 | 0.04 | 0.13 |
| YML020W   |       | 7018  | 6336  | 1.11 | 0.15 | 0.04 | 0.13 |
| YML076C   |       | 1337  | 1207  | 1.11 | 0.15 | 0.04 | 0.13 |
| YML118W   |       | 432   | 390   | 1.11 | 0.15 | 0.04 | 0.13 |
| YCL022C   |       | 4022  | 3631  | 1.11 | 0.15 | 0.04 | 0.13 |
| YER027C   | GAL83 | 2386  | 2154  | 1.11 | 0.15 | 0.03 | 0.13 |
| YMR172C-A |       | 1207  | 1090  | 1.11 | 0.15 | 0.03 | 0.13 |
| YDR247W   |       | 1213  | 1095  | 1.11 | 0.15 | 0.03 | 0.13 |
| YDL056W   | MBP1  | 2763  | 2495  | 1.11 | 0.15 | 0.03 | 0.13 |
| YHR153C   | SPO16 | 5567  | 5028  | 1.11 | 0.15 | 0.03 | 0.13 |
| YCLX10C   |       | 8949  | 8083  | 1.11 | 0.15 | 0.03 | 0.13 |
| YIRO44C   |       | 3265  | 2949  | 1.11 | 0.15 | 0.03 | 0.12 |
| YER022W   | SRB4  | 1455  | 1314  | 1.11 | 0.15 | 0.03 | 0.12 |
| YJL029C   |       | 4217  | 3810  | 1.11 | 0.15 | 0.03 | 0.12 |

|         |        |       |       |      |      |      |      |
|---------|--------|-------|-------|------|------|------|------|
| YJL013C | MAD3   | 4130  | 3731  | 1.11 | 0.15 | 0.03 | 0.12 |
| YGR151C |        | 3844  | 3473  | 1.11 | 0.15 | 0.03 | 0.12 |
| YDR203W |        | 1442  | 1303  | 1.11 | 0.15 | 0.03 | 0.12 |
| YKRO89C |        | 1174  | 1061  | 1.11 | 0.15 | 0.03 | 0.12 |
| YNL116W |        | 4293  | 3879  | 1.11 | 0.15 | 0.03 | 0.12 |
| YER049W |        | 21426 | 19362 | 1.11 | 0.15 | 0.03 | 0.12 |
| YLR196W | PWP1   | 4429  | 4003  | 1.11 | 0.15 | 0.03 | 0.12 |
| YOR375C | GDH1   | 2889  | 2611  | 1.11 | 0.15 | 0.03 | 0.12 |
| YDL024C |        | 1751  | 1583  | 1.11 | 0.15 | 0.03 | 0.12 |
| YMR023C | MSS1   | 4347  | 3930  | 1.11 | 0.15 | 0.03 | 0.12 |
| YER069W | ARG5,6 | 388   | 351   | 1.11 | 0.15 | 0.03 | 0.12 |
| YNL056W |        | 13420 | 12133 | 1.11 | 0.15 | 0.03 | 0.12 |
| YHR019C | DED81  | 22707 | 20529 | 1.11 | 0.15 | 0.03 | 0.12 |
| YER029C | SMB1   | 8190  | 7405  | 1.11 | 0.15 | 0.03 | 0.12 |
| YMR044W |        | 2276  | 2058  | 1.11 | 0.15 | 0.03 | 0.12 |
| YOR276W | CAF20  | 24257 | 21933 | 1.11 | 0.15 | 0.03 | 0.12 |
| YMR182C | RGM1   | 2513  | 2272  | 1.11 | 0.15 | 0.03 | 0.12 |
| YDR227W | SIR4   | 1135  | 1026  | 1.11 | 0.15 | 0.03 | 0.12 |
| YFL013C |        | 8165  | 7384  | 1.11 | 0.15 | 0.03 | 0.12 |
| YIL083C |        | 3923  | 3548  | 1.11 | 0.15 | 0.03 | 0.12 |
| YDL235C | YPD1   | 4224  | 3820  | 1.11 | 0.15 | 0.03 | 0.12 |
| YHR120W | MSH1   | 3043  | 2752  | 1.11 | 0.15 | 0.03 | 0.12 |
| YPL120W | VPS30  | 7589  | 6863  | 1.11 | 0.14 | 0.03 | 0.12 |
| YOR211C | MGM1   | 827   | 748   | 1.11 | 0.14 | 0.03 | 0.12 |
| YNL100W |        | 11234 | 10161 | 1.11 | 0.14 | 0.03 | 0.12 |
| YDL107W | MSS2   | 2018  | 1825  | 1.11 | 0.14 | 0.03 | 0.12 |
| YOR114W |        | 1803  | 1631  | 1.11 | 0.14 | 0.03 | 0.12 |
| YJL220W |        | 942   | 852   | 1.11 | 0.14 | 0.03 | 0.12 |
| YLR148W | PEP3   | 1137  | 1029  | 1.11 | 0.14 | 0.03 | 0.12 |
| YOR392W |        | 392   | 355   | 1.11 | 0.14 | 0.03 | 0.12 |
| YDL083C | RPS16B | 27572 | 24948 | 1.11 | 0.14 | 0.03 | 0.12 |
| YIL058W |        | 3433  | 3106  | 1.11 | 0.14 | 0.03 | 0.12 |
| YBL005W | PDR3   | 3800  | 3439  | 1.11 | 0.14 | 0.03 | 0.12 |
| YDR319C |        | 3308  | 2994  | 1.10 | 0.14 | 0.03 | 0.11 |
| YOR006C |        | 12242 | 11080 | 1.10 | 0.14 | 0.03 | 0.11 |
| YHR195W | VAB36  | 2483  | 2247  | 1.10 | 0.14 | 0.03 | 0.11 |



|           |       |       |       |      |      |      |      |
|-----------|-------|-------|-------|------|------|------|------|
| YDR178W   | SDH4  | 4087  | 3700  | 1.10 | 0.14 | 0.03 | 0.11 |
| YDR126W   |       | 3684  | 3335  | 1.10 | 0.14 | 0.03 | 0.11 |
| YFR028C   | CDC14 | 4682  | 4239  | 1.10 | 0.14 | 0.03 | 0.11 |
| YAL035C-A |       | 2362  | 2139  | 1.10 | 0.14 | 0.03 | 0.11 |
| YGL262W   |       | 563   | 510   | 1.10 | 0.14 | 0.03 | 0.11 |
| YPR091C   |       | 3140  | 2844  | 1.10 | 0.14 | 0.03 | 0.11 |
| YKL200C   |       | 734   | 665   | 1.10 | 0.14 | 0.03 | 0.11 |
| YHR028C   | DAP2  | 16023 | 14515 | 1.10 | 0.14 | 0.03 | 0.11 |
| YBR010W   | HHT1  | 30992 | 28076 | 1.10 | 0.14 | 0.03 | 0.11 |
| YDR436W   | PPZ2  | 2305  | 2088  | 1.10 | 0.14 | 0.03 | 0.11 |
| YOR120W   | GCY1  | 2045  | 1853  | 1.10 | 0.14 | 0.03 | 0.11 |
| YLR083C   | EMP70 | 16973 | 15380 | 1.10 | 0.14 | 0.03 | 0.11 |
| YDR290W   |       | 2187  | 1982  | 1.10 | 0.14 | 0.03 | 0.11 |
| YEL017C-A | PMP2  | 22931 | 20783 | 1.10 | 0.14 | 0.03 | 0.11 |
| YNL163C   |       | 3174  | 2877  | 1.10 | 0.14 | 0.03 | 0.11 |
| YGL115W   | SNF4  | 16667 | 15107 | 1.10 | 0.14 | 0.03 | 0.11 |
| YOL125W   |       | 3332  | 3020  | 1.10 | 0.14 | 0.03 | 0.11 |
| YOR201C   | PET56 | 13158 | 11928 | 1.10 | 0.14 | 0.03 | 0.11 |
| YLR132C   |       | 1982  | 1797  | 1.10 | 0.14 | 0.03 | 0.11 |
| YEL012W   | UBC8  | 1856  | 1683  | 1.10 | 0.14 | 0.03 | 0.11 |
| YML008C   | ERG6  | 26932 | 24417 | 1.10 | 0.14 | 0.03 | 0.11 |
| YHR083W   |       | 1388  | 1258  | 1.10 | 0.14 | 0.03 | 0.11 |
| YBR154C   | RPB5  | 28663 | 25987 | 1.10 | 0.14 | 0.03 | 0.11 |
| YHR196W   |       | 1141  | 1035  | 1.10 | 0.14 | 0.03 | 0.11 |
| YNL041C   |       | 3396  | 3079  | 1.10 | 0.14 | 0.03 | 0.11 |
| YEL068C   |       | 5325  | 4828  | 1.10 | 0.14 | 0.03 | 0.10 |
| YDL220C   | CDC13 | 3024  | 2742  | 1.10 | 0.14 | 0.03 | 0.10 |
| YOR258W   |       | 7655  | 6945  | 1.10 | 0.14 | 0.03 | 0.10 |
| YFL007W   | BLM3  | 6344  | 5756  | 1.10 | 0.14 | 0.03 | 0.10 |
| YML115C   | VAN1  | 8841  | 8021  | 1.10 | 0.14 | 0.03 | 0.10 |
| YDR478W   | SNM1  | 3587  | 3255  | 1.10 | 0.14 | 0.03 | 0.10 |
| YLL004W   | ORC3  | 3813  | 3460  | 1.10 | 0.14 | 0.03 | 0.10 |
| YLR247C   |       | 4734  | 4297  | 1.10 | 0.14 | 0.03 | 0.10 |
| YGR200C   |       | 13888 | 12606 | 1.10 | 0.14 | 0.03 | 0.10 |
| YILO70C   | MAM33 | 24301 | 22060 | 1.10 | 0.14 | 0.03 | 0.10 |
| YDR367W   |       | 12688 | 11518 | 1.10 | 0.14 | 0.03 | 0.10 |

|         |        |       |       |      |      |      |      |
|---------|--------|-------|-------|------|------|------|------|
| YPL276W |        | 964   | 875   | 1.10 | 0.14 | 0.03 | 0.10 |
| YLR246W | ERF2   | 9416  | 8549  | 1.10 | 0.14 | 0.03 | 0.10 |
| YLR170C | APS1   | 14756 | 13398 | 1.10 | 0.14 | 0.03 | 0.10 |
| YDR483W | KRE2   | 4468  | 4057  | 1.10 | 0.14 | 0.03 | 0.10 |
| YFR037C | RSC8   | 10694 | 9712  | 1.10 | 0.14 | 0.03 | 0.10 |
| YML059C |        | 6334  | 5752  | 1.10 | 0.14 | 0.03 | 0.10 |
| YNL109W |        | 7136  | 6483  | 1.10 | 0.14 | 0.03 | 0.09 |
| YJL222W | VTH2   | 2186  | 1986  | 1.10 | 0.14 | 0.03 | 0.09 |
| YFR029W | PTR3   | 5213  | 4736  | 1.10 | 0.14 | 0.03 | 0.09 |
| YPL049C | DIG1   | 3036  | 2759  | 1.10 | 0.14 | 0.03 | 0.09 |
| YFL045C | SEC53  | 38883 | 35334 | 1.10 | 0.14 | 0.03 | 0.09 |
| YDL048C | STP4   | 6071  | 5517  | 1.10 | 0.14 | 0.03 | 0.09 |
| YLR244C | MAP1   | 21716 | 19734 | 1.10 | 0.14 | 0.03 | 0.09 |
| YLR049C |        | 15367 | 13965 | 1.10 | 0.14 | 0.03 | 0.09 |
| YJL123C |        | 8923  | 8109  | 1.10 | 0.14 | 0.03 | 0.09 |
| YDL102W | CDC2   | 947   | 861   | 1.10 | 0.14 | 0.03 | 0.09 |
| YFL055W | AGP3   | 1951  | 1773  | 1.10 | 0.14 | 0.03 | 0.09 |
| YDR109C |        | 2638  | 2398  | 1.10 | 0.14 | 0.03 | 0.09 |
| YHR124W | NDT80  | 4600  | 4181  | 1.10 | 0.14 | 0.03 | 0.09 |
| YNL297C |        | 3218  | 2925  | 1.10 | 0.14 | 0.03 | 0.09 |
| YNL278W |        | 4046  | 3678  | 1.10 | 0.14 | 0.03 | 0.09 |
| YDL183C |        | 5799  | 5272  | 1.10 | 0.14 | 0.03 | 0.09 |
| YDR526C |        | 1722  | 1566  | 1.10 | 0.14 | 0.03 | 0.09 |
| YKL106W | AAT1   | 6793  | 6176  | 1.10 | 0.14 | 0.02 | 0.09 |
| YEL041W |        | 1013  | 921   | 1.10 | 0.14 | 0.02 | 0.09 |
| YGL126W | SCS3   | 1114  | 1013  | 1.10 | 0.14 | 0.02 | 0.09 |
| YIR005W | IST3   | 2941  | 2674  | 1.10 | 0.14 | 0.02 | 0.09 |
| YNL302C | RPS19B | 27154 | 24694 | 1.10 | 0.14 | 0.02 | 0.09 |
| YGL244W | RTF1   | 15095 | 13728 | 1.10 | 0.14 | 0.02 | 0.09 |
| YCL065W |        | 13327 | 12122 | 1.10 | 0.14 | 0.02 | 0.09 |
| YFR054C |        | 735   | 669   | 1.10 | 0.14 | 0.02 | 0.09 |
| YDL221W |        | 370   | 337   | 1.10 | 0.14 | 0.02 | 0.09 |
| YKL165C | MCD4   | 640   | 582   | 1.10 | 0.14 | 0.02 | 0.09 |
| YPL192C |        | 2176  | 1980  | 1.10 | 0.14 | 0.02 | 0.09 |
| YBR093C | PHO5   | 550   | 500   | 1.10 | 0.14 | 0.02 | 0.09 |
| YBL054W |        | 582   | 530   | 1.10 | 0.14 | 0.02 | 0.09 |

|           |        |       |       |      |      |      |      |
|-----------|--------|-------|-------|------|------|------|------|
| YOR229W   | WTM2   | 6764  | 6156  | 1.10 | 0.14 | 0.02 | 0.09 |
| YJR034W   | PET191 | 8891  | 8092  | 1.10 | 0.14 | 0.02 | 0.09 |
| YDR467C   |        | 3337  | 3037  | 1.10 | 0.14 | 0.02 | 0.09 |
| YBL018C   | POP8   | 10201 | 9284  | 1.10 | 0.14 | 0.02 | 0.09 |
| YBR237W   | PRP5   | 5590  | 5088  | 1.10 | 0.14 | 0.02 | 0.08 |
| YKL112W   | ABF1   | 5416  | 4930  | 1.10 | 0.14 | 0.02 | 0.08 |
| YOR245C   |        | 4118  | 3748  | 1.10 | 0.14 | 0.02 | 0.08 |
| YJR054W   |        | 923   | 840   | 1.10 | 0.14 | 0.02 | 0.08 |
| YFL059W   | SNZ3   | 3103  | 2825  | 1.10 | 0.14 | 0.02 | 0.08 |
| YDL182W   | LYS20  | 19882 | 18102 | 1.10 | 0.14 | 0.02 | 0.08 |
| YOL146W   |        | 5769  | 5253  | 1.10 | 0.14 | 0.02 | 0.08 |
| YNL167C   | SKO1   | 3244  | 2954  | 1.10 | 0.14 | 0.02 | 0.08 |
| YOL017W   |        | 2819  | 2567  | 1.10 | 0.14 | 0.02 | 0.08 |
| YOR217W   | RFC1   | 1880  | 1712  | 1.10 | 0.13 | 0.02 | 0.08 |
| YBR252W   | DUT1   | 11128 | 10136 | 1.10 | 0.13 | 0.02 | 0.08 |
| YDR480W   | DIG2   | 2536  | 2310  | 1.10 | 0.13 | 0.02 | 0.08 |
| YDR170C   | SEC7   | 947   | 863   | 1.10 | 0.13 | 0.02 | 0.08 |
| YHR142W   | CHS7   | 5014  | 4568  | 1.10 | 0.13 | 0.02 | 0.08 |
| YDR417C   |        | 25159 | 22923 | 1.10 | 0.13 | 0.02 | 0.08 |
| YOL134C   |        | 5166  | 4707  | 1.10 | 0.13 | 0.02 | 0.08 |
| YMR244C-A |        | 2165  | 1973  | 1.10 | 0.13 | 0.02 | 0.08 |
| YDR017C   | KCS1   | 879   | 801   | 1.10 | 0.13 | 0.02 | 0.08 |
| YLR143W   |        | 5862  | 5342  | 1.10 | 0.13 | 0.02 | 0.08 |
| YMR178W   |        | 2062  | 1879  | 1.10 | 0.13 | 0.02 | 0.08 |
| YKL144C   | RPC25  | 6354  | 5792  | 1.10 | 0.13 | 0.02 | 0.08 |
| YOR199W   |        | 4820  | 4394  | 1.10 | 0.13 | 0.02 | 0.08 |
| YER059W   | PCL6   | 3221  | 2936  | 1.10 | 0.13 | 0.02 | 0.08 |
| YNL137C   | NAM9   | 11434 | 10426 | 1.10 | 0.13 | 0.02 | 0.08 |
| YDR068W   | DOS2   | 16197 | 14769 | 1.10 | 0.13 | 0.02 | 0.08 |
| YNL294C   |        | 4180  | 3812  | 1.10 | 0.13 | 0.02 | 0.08 |
| YPL051W   | ARL3   | 4424  | 4034  | 1.10 | 0.13 | 0.02 | 0.08 |
| YJR144W   | MGM101 | 14187 | 12938 | 1.10 | 0.13 | 0.02 | 0.07 |
| YOR158W   | PET123 | 4034  | 3679  | 1.10 | 0.13 | 0.02 | 0.07 |
| YHR174W   | ENO2   | 1169  | 1066  | 1.10 | 0.13 | 0.02 | 0.07 |
| YNL030W   | HHF2   | 25001 | 22802 | 1.10 | 0.13 | 0.02 | 0.07 |
| YOR387C   |        | 2625  | 2394  | 1.10 | 0.13 | 0.02 | 0.07 |

|           |        |       |       |      |      |      |      |
|-----------|--------|-------|-------|------|------|------|------|
| YOL063C   |        | 3121  | 2847  | 1.10 | 0.13 | 0.02 | 0.07 |
| YMR211W   |        | 2163  | 1973  | 1.10 | 0.13 | 0.02 | 0.07 |
| YNL273W   | TOF1   | 3599  | 3284  | 1.10 | 0.13 | 0.02 | 0.07 |
| YOR017W   | PET127 | 1337  | 1220  | 1.10 | 0.13 | 0.02 | 0.07 |
| YCR105W   |        | 2176  | 1986  | 1.10 | 0.13 | 0.02 | 0.07 |
| YLR450W   | HMG2   | 1375  | 1255  | 1.10 | 0.13 | 0.02 | 0.07 |
| YDL186W   |        | 828   | 756   | 1.10 | 0.13 | 0.02 | 0.07 |
| YCR075C   | ERS1   | 4427  | 4040  | 1.10 | 0.13 | 0.02 | 0.07 |
| YEL054C   | RPL12A | 21651 | 19765 | 1.10 | 0.13 | 0.02 | 0.07 |
| YBR136W   | ESR1   | 711   | 649   | 1.10 | 0.13 | 0.02 | 0.07 |
| YMR153C-A |        | 5351  | 4885  | 1.10 | 0.13 | 0.02 | 0.07 |
| YMR283C   | RIT1   | 5623  | 5134  | 1.10 | 0.13 | 0.02 | 0.07 |
| YLR277C   | YSH1   | 5113  | 4669  | 1.10 | 0.13 | 0.02 | 0.07 |
| YDR198C   |        | 8403  | 7674  | 1.10 | 0.13 | 0.02 | 0.07 |
| YBL060W   |        | 9464  | 8643  | 1.10 | 0.13 | 0.02 | 0.07 |
| YIL002C   | INP51  | 2975  | 2717  | 1.09 | 0.13 | 0.02 | 0.07 |
| YBR135W   | CKS1   | 9182  | 8387  | 1.09 | 0.13 | 0.02 | 0.07 |
| YER084W   |        | 1275  | 1165  | 1.09 | 0.13 | 0.02 | 0.07 |
| YPR130C   |        | 6421  | 5865  | 1.09 | 0.13 | 0.02 | 0.07 |
| YPL017C   |        | 781   | 713   | 1.09 | 0.13 | 0.02 | 0.07 |
| YHR178W   | STB5   | 4171  | 3810  | 1.09 | 0.13 | 0.02 | 0.07 |
| YGR090W   |        | 11713 | 10700 | 1.09 | 0.13 | 0.02 | 0.07 |
| YIL030C   | SSM4   | 6037  | 5515  | 1.09 | 0.13 | 0.02 | 0.07 |
| YKL221W   |        | 1738  | 1588  | 1.09 | 0.13 | 0.02 | 0.06 |
| YOL151W   | GRE2   | 5218  | 4769  | 1.09 | 0.13 | 0.02 | 0.06 |
| YDR081C   | PDC2   | 6179  | 5648  | 1.09 | 0.13 | 0.02 | 0.06 |
| YKL146W   |        | 1884  | 1722  | 1.09 | 0.13 | 0.02 | 0.06 |
| YMR202W   | ERG2   | 11333 | 10360 | 1.09 | 0.13 | 0.02 | 0.06 |
| YAL041W   | CDC24  | 3537  | 3233  | 1.09 | 0.13 | 0.02 | 0.06 |
| YDR475C   |        | 1325  | 1211  | 1.09 | 0.13 | 0.02 | 0.06 |
| YOR310C   | NOP58  | 11173 | 10215 | 1.09 | 0.13 | 0.02 | 0.06 |
| YFR007W   |        | 5103  | 4666  | 1.09 | 0.13 | 0.02 | 0.06 |
| YJR013W   |        | 787   | 720   | 1.09 | 0.13 | 0.02 | 0.06 |
| YGL058W   | RAD6   | 10827 | 9901  | 1.09 | 0.13 | 0.02 | 0.06 |
| YOR263C   |        | 4394  | 4018  | 1.09 | 0.13 | 0.02 | 0.06 |
| YKL034W   |        | 2617  | 2393  | 1.09 | 0.13 | 0.02 | 0.06 |

|         |       |       |       |      |      |      |      |
|---------|-------|-------|-------|------|------|------|------|
| YDL212W | SHR3  | 5580  | 5104  | 1.09 | 0.13 | 0.02 | 0.06 |
| YDR032C |       | 12571 | 11499 | 1.09 | 0.13 | 0.02 | 0.06 |
| YDL047W | SIT4  | 4889  | 4472  | 1.09 | 0.13 | 0.02 | 0.06 |
| YNL047C |       | 8776  | 8029  | 1.09 | 0.13 | 0.02 | 0.06 |
| YOR163W |       | 1483  | 1357  | 1.09 | 0.13 | 0.02 | 0.06 |
| YGR263C |       | 3090  | 2827  | 1.09 | 0.13 | 0.02 | 0.06 |
| YGR238C | KEL2  | 3817  | 3493  | 1.09 | 0.13 | 0.02 | 0.06 |
| YDR501W | PLM2  | 2096  | 1918  | 1.09 | 0.13 | 0.02 | 0.06 |
| YNL178W | RPS3  | 34578 | 31647 | 1.09 | 0.13 | 0.02 | 0.06 |
| YBL024W | NCL1  | 14504 | 13276 | 1.09 | 0.13 | 0.02 | 0.06 |
| YBL003C | HTA2  | 21769 | 19929 | 1.09 | 0.13 | 0.02 | 0.05 |
| YGR203W |       | 2215  | 2028  | 1.09 | 0.13 | 0.01 | 0.05 |
| YNL306W |       | 11289 | 10339 | 1.09 | 0.13 | 0.01 | 0.05 |
| YKL093W | MBR1  | 1508  | 1381  | 1.09 | 0.13 | 0.01 | 0.05 |
| YOL092W |       | 23062 | 21122 | 1.09 | 0.13 | 0.01 | 0.05 |
| YGR004W |       | 2446  | 2240  | 1.09 | 0.13 | 0.01 | 0.05 |
| YHR210C |       | 8580  | 7859  | 1.09 | 0.13 | 0.01 | 0.05 |
| YJL076W | NET1  | 11613 | 10638 | 1.09 | 0.13 | 0.01 | 0.05 |
| YMR013C | SEC59 | 8108  | 7428  | 1.09 | 0.13 | 0.01 | 0.05 |
| YJR151C |       | 1820  | 1667  | 1.09 | 0.13 | 0.01 | 0.05 |
| YGL035C | MIG1  | 12154 | 11136 | 1.09 | 0.13 | 0.01 | 0.05 |
| YIL177C |       | 12238 | 11213 | 1.09 | 0.13 | 0.01 | 0.05 |
| YPL062W |       | 649   | 595   | 1.09 | 0.13 | 0.01 | 0.05 |
| YHR034C |       | 17301 | 15854 | 1.09 | 0.13 | 0.01 | 0.05 |
| YIL090W |       | 7463  | 6839  | 1.09 | 0.13 | 0.01 | 0.05 |
| YGR234W | YHB1  | 50314 | 46111 | 1.09 | 0.13 | 0.01 | 0.05 |
| YJL153C | INO1  | 567   | 520   | 1.09 | 0.13 | 0.01 | 0.05 |
| YCR103C |       | 1556  | 1426  | 1.09 | 0.13 | 0.01 | 0.05 |
| YMR262W |       | 2528  | 2317  | 1.09 | 0.13 | 0.01 | 0.05 |
| YMR083W | ADH3  | 13884 | 12729 | 1.09 | 0.13 | 0.01 | 0.05 |
| YAL032C | PRP45 | 10465 | 9595  | 1.09 | 0.13 | 0.01 | 0.05 |
| YOR374W | ALD4  | 6474  | 5937  | 1.09 | 0.13 | 0.01 | 0.05 |
| YPL083C | SEN54 | 3703  | 3396  | 1.09 | 0.12 | 0.01 | 0.05 |
| YLR045C | STU2  | 10443 | 9577  | 1.09 | 0.12 | 0.01 | 0.05 |
| YGR171C | MSM1  | 2241  | 2055  | 1.09 | 0.12 | 0.01 | 0.04 |
| YDR335W | MSN5  | 2164  | 1985  | 1.09 | 0.12 | 0.01 | 0.04 |

|         |        |       |       |      |      |      |      |
|---------|--------|-------|-------|------|------|------|------|
| YDL202W | MRPL11 | 6833  | 6268  | 1.09 | 0.12 | 0.01 | 0.04 |
| YLR118C |        | 3925  | 3601  | 1.09 | 0.12 | 0.01 | 0.04 |
| YKL191W | DPH2   | 10492 | 9627  | 1.09 | 0.12 | 0.01 | 0.04 |
| YPR169W |        | 28215 | 25892 | 1.09 | 0.12 | 0.01 | 0.04 |
| YLR286C | CTS1   | 30314 | 27819 | 1.09 | 0.12 | 0.01 | 0.04 |
| YLR291C | GCD7   | 16838 | 15452 | 1.09 | 0.12 | 0.01 | 0.04 |
| YLR117C | SYF3   | 10327 | 9477  | 1.09 | 0.12 | 0.01 | 0.04 |
| YDL230W | PTP1   | 5014  | 4602  | 1.09 | 0.12 | 0.01 | 0.04 |
| YGR076C | MRPL25 | 6243  | 5730  | 1.09 | 0.12 | 0.01 | 0.04 |
| YHR175W | CTR2   | 8362  | 7675  | 1.09 | 0.12 | 0.01 | 0.04 |
| YLR198C |        | 8480  | 7783  | 1.09 | 0.12 | 0.01 | 0.04 |
| YGR134W |        | 7028  | 6451  | 1.09 | 0.12 | 0.01 | 0.04 |
| YDR453C |        | 3100  | 2846  | 1.09 | 0.12 | 0.01 | 0.04 |
| YOL044W | PEX15  | 7300  | 6701  | 1.09 | 0.12 | 0.01 | 0.04 |
| YDL140C | RPO21  | 2969  | 2726  | 1.09 | 0.12 | 0.01 | 0.04 |
| YCRX05W |        | 707   | 649   | 1.09 | 0.12 | 0.01 | 0.04 |
| YDR148C | KGD2   | 17378 | 15958 | 1.09 | 0.12 | 0.01 | 0.04 |
| YDL106C | GRF10  | 4072  | 3740  | 1.09 | 0.12 | 0.01 | 0.04 |
| YCL068C |        | 556   | 511   | 1.09 | 0.12 | 0.01 | 0.04 |
| YML104C | MDM1   | 802   | 737   | 1.09 | 0.12 | 0.01 | 0.04 |
| YGL205W | POX1   | 738   | 678   | 1.09 | 0.12 | 0.01 | 0.04 |
| YDR310C | SUM1   | 5779  | 5308  | 1.09 | 0.12 | 0.01 | 0.04 |
| YER114C | BOI2   | 3571  | 3280  | 1.09 | 0.12 | 0.01 | 0.04 |
| YOL037C |        | 1887  | 1733  | 1.09 | 0.12 | 0.01 | 0.04 |
| YGL208W | SIP2   | 3591  | 3299  | 1.09 | 0.12 | 0.01 | 0.04 |
| YGL059W |        | 3803  | 3494  | 1.09 | 0.12 | 0.01 | 0.04 |
| YPL174C | NIP100 | 2509  | 2305  | 1.09 | 0.12 | 0.01 | 0.04 |
| YMR284W | YKU70  | 2265  | 2082  | 1.09 | 0.12 | 0.01 | 0.03 |
| YLR399C | BDF1   | 13616 | 12515 | 1.09 | 0.12 | 0.01 | 0.03 |
| YHR085W |        | 29057 | 26709 | 1.09 | 0.12 | 0.01 | 0.03 |
| YER019W |        | 1230  | 1131  | 1.09 | 0.12 | 0.01 | 0.03 |
| YCL008C | STP22  | 3199  | 2941  | 1.09 | 0.12 | 0.01 | 0.03 |
| YPR137W | RRP9   | 644   | 592   | 1.09 | 0.12 | 0.01 | 0.03 |
| YML120C | NDI1   | 5475  | 5035  | 1.09 | 0.12 | 0.01 | 0.03 |
| YPR152C |        | 1174  | 1080  | 1.09 | 0.12 | 0.01 | 0.03 |
| YBR245C | ISW1   | 711   | 654   | 1.09 | 0.12 | 0.01 | 0.03 |

|         |       |       |       |      |      |      |      |
|---------|-------|-------|-------|------|------|------|------|
| YKR036C | CAF4  | 1109  | 1020  | 1.09 | 0.12 | 0.01 | 0.03 |
| YLR181C |       | 4819  | 4434  | 1.09 | 0.12 | 0.01 | 0.03 |
| YNL084C | END3  | 16070 | 14788 | 1.09 | 0.12 | 0.01 | 0.03 |
| YOR165W |       | 15974 | 14701 | 1.09 | 0.12 | 0.01 | 0.03 |
| YGL005C |       | 15139 | 13936 | 1.09 | 0.12 | 0.01 | 0.03 |
| YER083C |       | 3195  | 2941  | 1.09 | 0.12 | 0.01 | 0.03 |
| YJR078W |       | 719   | 662   | 1.09 | 0.12 | 0.01 | 0.03 |
| YBR002C | RER2  | 3228  | 2972  | 1.09 | 0.12 | 0.01 | 0.02 |
| YPL128C | TBF1  | 9070  | 8353  | 1.09 | 0.12 | 0.01 | 0.02 |
| YMR109W | MYO5  | 4411  | 4063  | 1.09 | 0.12 | 0.01 | 0.02 |
| YPL222W |       | 823   | 758   | 1.09 | 0.12 | 0.01 | 0.02 |
| YPL279C |       | 17688 | 16293 | 1.09 | 0.12 | 0.01 | 0.02 |
| YHL014C | YLF2  | 2373  | 2186  | 1.09 | 0.12 | 0.01 | 0.02 |
| YHL038C | CBP2  | 554   | 510   | 1.09 | 0.12 | 0.01 | 0.02 |
| YKL122C | SRP21 | 9345  | 8609  | 1.09 | 0.12 | 0.01 | 0.02 |
| YDR235W | PRP42 | 980   | 903   | 1.09 | 0.12 | 0.01 | 0.02 |
| YPL202C |       | 12812 | 11804 | 1.09 | 0.12 | 0.01 | 0.02 |
| YOR136W | IDH2  | 16186 | 14914 | 1.09 | 0.12 | 0.01 | 0.02 |
| YOR304W | ISW2  | 1215  | 1120  | 1.09 | 0.12 | 0.01 | 0.02 |
| YKL025C | PAN3  | 5266  | 4853  | 1.09 | 0.12 | 0.01 | 0.02 |
| YHR057C | CYP2  | 2830  | 2608  | 1.09 | 0.12 | 0.01 | 0.02 |
| YBR200W | BEM1  | 2729  | 2515  | 1.08 | 0.12 | 0.01 | 0.02 |
| YMR053C | STB2  | 2692  | 2481  | 1.08 | 0.12 | 0.01 | 0.02 |
| YIR023W | DAL81 | 4042  | 3726  | 1.08 | 0.12 | 0.01 | 0.02 |
| YDR470C |       | 1907  | 1758  | 1.08 | 0.12 | 0.01 | 0.02 |
| YNL090W | RHO2  | 10961 | 10106 | 1.08 | 0.12 | 0.00 | 0.02 |
| YHR039C |       | 20992 | 19355 | 1.08 | 0.12 | 0.00 | 0.02 |
| YKR092C | SRP40 | 2807  | 2588  | 1.08 | 0.12 | 0.00 | 0.02 |
| YDR234W | LYS4  | 1657  | 1528  | 1.08 | 0.12 | 0.00 | 0.02 |
| YGR113W | DAM1  | 4089  | 3771  | 1.08 | 0.12 | 0.00 | 0.02 |
| YOR051C |       | 13289 | 12258 | 1.08 | 0.12 | 0.00 | 0.02 |
| YGL036W | MTC2  | 4478  | 4132  | 1.08 | 0.12 | 0.00 | 0.01 |
| YPL229W |       | 8056  | 7433  | 1.08 | 0.12 | 0.00 | 0.01 |
| YOR279C |       | 4101  | 3784  | 1.08 | 0.12 | 0.00 | 0.01 |
| YNL315C | ATP11 | 26160 | 24138 | 1.08 | 0.12 | 0.00 | 0.01 |
| YJR043C | POL32 | 4466  | 4121  | 1.08 | 0.12 | 0.00 | 0.01 |

|         |       |       |       |      |      |      |      |
|---------|-------|-------|-------|------|------|------|------|
| YPL150W |       | 3971  | 3665  | 1.08 | 0.12 | 0.00 | 0.01 |
| YFR022W |       | 1681  | 1552  | 1.08 | 0.12 | 0.00 | 0.01 |
| YOR053W |       | 6319  | 5832  | 1.08 | 0.12 | 0.00 | 0.01 |
| YMR326C |       | 887   | 819   | 1.08 | 0.12 | 0.00 | 0.01 |
| YOR287C |       | 5594  | 5164  | 1.08 | 0.12 | 0.00 | 0.01 |
| YIL128W | MET18 | 5003  | 4619  | 1.08 | 0.12 | 0.00 | 0.01 |
| YCR073C | SSK22 | 1132  | 1045  | 1.08 | 0.12 | 0.00 | 0.01 |
| YNL279W |       | 3389  | 3129  | 1.08 | 0.12 | 0.00 | 0.01 |
| YMR055C | BUB2  | 3482  | 3215  | 1.08 | 0.12 | 0.00 | 0.01 |
| YOR155C |       | 360   | 332   | 1.08 | 0.11 | 0.00 | 0.01 |
| YOL159C |       | 2245  | 2073  | 1.08 | 0.11 | 0.00 | 0.01 |
| YKL032C | IXR1  | 2660  | 2457  | 1.08 | 0.11 | 0.00 | 0.01 |
| YFR011C |       | 12837 | 11857 | 1.08 | 0.11 | 0.00 | 0.01 |
| YPR020W | ATP20 | 18340 | 16941 | 1.08 | 0.11 | 0.00 | 0.01 |
| YML086C | ALO1  | 5323  | 4918  | 1.08 | 0.11 | 0.00 | 0.01 |
| YNL183C | NPR1  | 4131  | 3817  | 1.08 | 0.11 | 0.00 | 0.01 |
| YMR156C |       | 2536  | 2343  | 1.08 | 0.11 | 0.00 | 0.01 |
| YPL017C |       | 6104  | 5640  | 1.08 | 0.11 | 0.00 | 0.01 |
| YPL197C |       | 42835 | 39580 | 1.08 | 0.11 | 0.00 | 0.01 |
| YJR090C | GRR1  | 2462  | 2275  | 1.08 | 0.11 | 0.00 | 0.01 |
| YNR018W |       | 22124 | 20444 | 1.08 | 0.11 | 0.00 | 0.01 |
| YMR096W | SNZ1  | 2062  | 1905  | 1.08 | 0.11 | 0.00 | 0.01 |
| YJR084W |       | 1750  | 1617  | 1.08 | 0.11 | 0.00 | 0.01 |
| YPR069C | SPE3  | 24506 | 22646 | 1.08 | 0.11 | 0.00 | 0.01 |
| YPL130W | SPO19 | 1277  | 1180  | 1.08 | 0.11 | 0.00 | 0.01 |
| YGR084C | MRP13 | 12126 | 11208 | 1.08 | 0.11 | 0.00 | 0.00 |
| YDR536W | STL1  | 2031  | 1878  | 1.08 | 0.11 | 0.00 | 0.00 |
| YJL183W | MNN11 | 5896  | 5451  | 1.08 | 0.11 | 0.00 | 0.00 |
| YER127W | LCP5  | 4342  | 4014  | 1.08 | 0.11 | 0.00 | 0.00 |
| YMR298W |       | 12466 | 11527 | 1.08 | 0.11 | 0.00 | 0.00 |
| YDL210W | UGA4  | 849   | 785   | 1.08 | 0.11 | 0.00 | 0.00 |
| YDR168W | CDC37 | 14778 | 13669 | 1.08 | 0.11 | 0.00 | 0.00 |
| YLR301W |       | 12379 | 11453 | 1.08 | 0.11 | 0.00 | 0.00 |
| YDR251W | PAM1  | 1332  | 1232  | 1.08 | 0.11 | 0.00 | 0.00 |
| YAL033W | POP5  | 3463  | 3204  | 1.08 | 0.11 | 0.00 | 0.00 |
| YMR214W | SCJ1  | 2569  | 2377  | 1.08 | 0.11 | 0.00 | 0.00 |



|         |        |       |       |      |      |      |       |
|---------|--------|-------|-------|------|------|------|-------|
| YOR372C | NDD1   | 4411  | 4083  | 1.08 | 0.11 | 0.00 | 0.00  |
| YGR219W |        | 7389  | 6839  | 1.08 | 0.11 | 0.00 | 0.00  |
| YGR135W | PRE9   | 10619 | 9829  | 1.08 | 0.11 | 0.00 | 0.00  |
| YDLO43C | PRP11  | 2900  | 2684  | 1.08 | 0.11 | 0.00 | 0.00  |
| YAR003W |        | 6010  | 5563  | 1.08 | 0.11 | 0.00 | 0.00  |
| YPR189W | SKI3   | 3411  | 3158  | 1.08 | 0.11 | 0.00 | 0.00  |
| YEL048C |        | 12190 | 11289 | 1.08 | 0.11 | 0.00 | -0.01 |
| YGL182C |        | 1053  | 975   | 1.08 | 0.11 | 0.00 | -0.01 |
| YOL108C | INO4   | 7478  | 6927  | 1.08 | 0.11 | 0.00 | -0.01 |
| YER121W |        | 2083  | 1930  | 1.08 | 0.11 | 0.00 | -0.01 |
| YOL093W |        | 13341 | 12359 | 1.08 | 0.11 | 0.00 | -0.01 |
| YKR038C |        | 8994  | 8332  | 1.08 | 0.11 | 0.00 | -0.01 |
| YBL096C |        | 2749  | 2547  | 1.08 | 0.11 | 0.00 | -0.01 |
| YOL062C | APM4   | 11785 | 10919 | 1.08 | 0.11 | 0.00 | -0.01 |
| YJR135C | MCM22  | 3293  | 3052  | 1.08 | 0.11 | 0.00 | -0.01 |
| YHR073W |        | 3666  | 3398  | 1.08 | 0.11 | 0.00 | -0.01 |
| YJR001W |        | 10379 | 9619  | 1.08 | 0.11 | 0.00 | -0.01 |
| YJL103C |        | 1024  | 949   | 1.08 | 0.11 | 0.00 | -0.01 |
| YOR246C |        | 17386 | 16114 | 1.08 | 0.11 | 0.00 | -0.01 |
| YDR093W |        | 6737  | 6244  | 1.08 | 0.11 | 0.00 | -0.01 |
| YJR100C |        | 5501  | 5099  | 1.08 | 0.11 | 0.00 | -0.01 |
| YHR037W | PUT2   | 358   | 332   | 1.08 | 0.11 | 0.00 | -0.01 |
| YPR087W |        | 3996  | 3704  | 1.08 | 0.11 | 0.00 | -0.01 |
| YJR096W |        | 4757  | 4410  | 1.08 | 0.11 | 0.00 | -0.01 |
| YNL074C | MLF3   | 16808 | 15581 | 1.08 | 0.11 | 0.00 | -0.01 |
| YPR097W |        | 5163  | 4787  | 1.08 | 0.11 | 0.00 | -0.01 |
| YGL081W |        | 2060  | 1910  | 1.08 | 0.11 | 0.00 | -0.01 |
| YMR114C |        | 2704  | 2507  | 1.08 | 0.11 | 0.00 | -0.01 |
| YJL134W | LCB3   | 20401 | 18916 | 1.08 | 0.11 | 0.00 | -0.01 |
| YJL024C | APS3   | 6856  | 6357  | 1.08 | 0.11 | 0.00 | -0.01 |
| YMR304W | UBP15  | 5099  | 4729  | 1.08 | 0.11 | 0.00 | -0.01 |
| YJR041C |        | 983   | 912   | 1.08 | 0.11 | 0.00 | -0.02 |
| YBL027W | RPL19B | 29033 | 26940 | 1.08 | 0.11 | 0.00 | -0.02 |
| YPL031C | PHO85  | 5176  | 4803  | 1.08 | 0.11 | 0.00 | -0.02 |
| YML002W |        | 1613  | 1497  | 1.08 | 0.11 | 0.00 | -0.02 |
| YLR208W | SEC13  | 9517  | 8834  | 1.08 | 0.11 | 0.00 | -0.02 |

|           |           |       |       |      |      |       |       |
|-----------|-----------|-------|-------|------|------|-------|-------|
| YPR059C   |           | 2551  | 2368  | 1.08 | 0.11 | -0.01 | -0.02 |
| YOR304C-A |           | 4469  | 4149  | 1.08 | 0.11 | -0.01 | -0.02 |
| YJL082W   | IML2      | 7509  | 6972  | 1.08 | 0.11 | -0.01 | -0.02 |
| YLR040C   |           | 14063 | 13058 | 1.08 | 0.11 | -0.01 | -0.02 |
| YLR035C   |           | 1948  | 1809  | 1.08 | 0.11 | -0.01 | -0.02 |
| YMR120C   | ADE17     | 6452  | 5992  | 1.08 | 0.11 | -0.01 | -0.02 |
| YMR244W   |           | 522   | 485   | 1.08 | 0.11 | -0.01 | -0.02 |
| YPR146C   |           | 1247  | 1158  | 1.08 | 0.11 | -0.01 | -0.02 |
| YMR084W   |           | 725   | 673   | 1.08 | 0.11 | -0.01 | -0.02 |
| YKL088W   |           | 11196 | 10400 | 1.08 | 0.11 | -0.01 | -0.02 |
| YJL009W   |           | 4776  | 4437  | 1.08 | 0.11 | -0.01 | -0.02 |
| YMR227C   | TAF67     | 2328  | 2163  | 1.08 | 0.11 | -0.01 | -0.02 |
| YFR014C   | CMK1      | 4709  | 4376  | 1.08 | 0.11 | -0.01 | -0.02 |
| YER098W   | UBP9      | 1803  | 1676  | 1.08 | 0.11 | -0.01 | -0.03 |
| YGL066W   |           | 919   | 854   | 1.08 | 0.11 | -0.01 | -0.03 |
| YGR001C   |           | 14757 | 13720 | 1.08 | 0.11 | -0.01 | -0.03 |
| YDR206W   | EBS1      | 7891  | 7336  | 1.08 | 0.11 | -0.01 | -0.03 |
| YBR032W   |           | 2463  | 2291  | 1.08 | 0.10 | -0.01 | -0.03 |
| YMR277W   | FCP1      | 3783  | 3518  | 1.08 | 0.10 | -0.01 | -0.03 |
| YGR075C   | PRP38     | 7999  | 7440  | 1.08 | 0.10 | -0.01 | -0.03 |
| YNL196C   | SLZ1      | 1958  | 1821  | 1.08 | 0.10 | -0.01 | -0.03 |
| YER136W   | GDI1      | 22358 | 20798 | 1.08 | 0.10 | -0.01 | -0.03 |
| YLR228C   | ECM22     | 9636  | 8964  | 1.08 | 0.10 | -0.01 | -0.03 |
| YPR191W   | QCR2      | 23140 | 21527 | 1.07 | 0.10 | -0.01 | -0.03 |
| YNL070W   | TOM7      | 12971 | 12067 | 1.07 | 0.10 | -0.01 | -0.03 |
| YNL299W   | TRF5      | 5245  | 4880  | 1.07 | 0.10 | -0.01 | -0.03 |
| YHR116W   |           | 3404  | 3167  | 1.07 | 0.10 | -0.01 | -0.03 |
| YDR534C   |           | 1025  | 954   | 1.07 | 0.10 | -0.01 | -0.03 |
| YLR022C   |           | 14493 | 13486 | 1.07 | 0.10 | -0.01 | -0.03 |
| YCL067C   | HMLALPHA2 | 23671 | 22028 | 1.07 | 0.10 | -0.01 | -0.03 |
| YNL301C   | RPL18B    | 41036 | 38198 | 1.07 | 0.10 | -0.01 | -0.03 |
| YNR048W   |           | 10097 | 9400  | 1.07 | 0.10 | -0.01 | -0.03 |
| YNL271C   | BNI1      | 3789  | 3528  | 1.07 | 0.10 | -0.01 | -0.03 |
| YDL174C   | DLD1      | 2160  | 2011  | 1.07 | 0.10 | -0.01 | -0.03 |
| YCR090C   |           | 13120 | 12215 | 1.07 | 0.10 | -0.01 | -0.03 |
| YJL131C   |           | 2335  | 2174  | 1.07 | 0.10 | -0.01 | -0.03 |

|         |       |       |       |      |      |       |       |
|---------|-------|-------|-------|------|------|-------|-------|
| YDR487C | RIB3  | 11647 | 10845 | 1.07 | 0.10 | -0.01 | -0.03 |
| YKL185W | ASH1  | 3185  | 2966  | 1.07 | 0.10 | -0.01 | -0.03 |
| YGR256W | GND2  | 7471  | 6957  | 1.07 | 0.10 | -0.01 | -0.03 |
| YOR331C |       | 24998 | 23282 | 1.07 | 0.10 | -0.01 | -0.04 |
| YPR155C | NCA2  | 1424  | 1327  | 1.07 | 0.10 | -0.01 | -0.04 |
| YPRO61C |       | 1404  | 1308  | 1.07 | 0.10 | -0.01 | -0.04 |
| YBL095W |       | 3906  | 3639  | 1.07 | 0.10 | -0.01 | -0.04 |
| YOR168W | GLN4  | 11217 | 10451 | 1.07 | 0.10 | -0.01 | -0.04 |
| YDR137W | RGP1  | 5943  | 5537  | 1.07 | 0.10 | -0.01 | -0.04 |
| YKL149C | DBR1  | 5783  | 5388  | 1.07 | 0.10 | -0.01 | -0.04 |
| YLR003C |       | 13691 | 12757 | 1.07 | 0.10 | -0.01 | -0.04 |
| YOR212W | STE4  | 9949  | 9272  | 1.07 | 0.10 | -0.01 | -0.04 |
| YGL117W |       | 16585 | 15458 | 1.07 | 0.10 | -0.01 | -0.04 |
| YGL230C |       | 1241  | 1157  | 1.07 | 0.10 | -0.01 | -0.04 |
| YJR129C |       | 902   | 841   | 1.07 | 0.10 | -0.01 | -0.04 |
| YJR133W | XPT1  | 7933  | 7395  | 1.07 | 0.10 | -0.01 | -0.04 |
| YOR129C |       | 1021  | 952   | 1.07 | 0.10 | -0.01 | -0.04 |
| YER021W | RPN3  | 6167  | 5749  | 1.07 | 0.10 | -0.01 | -0.04 |
| YNL260C |       | 3720  | 3468  | 1.07 | 0.10 | -0.01 | -0.04 |
| YIL171W | HXT12 | 822   | 766   | 1.07 | 0.10 | -0.01 | -0.04 |
| YPL159C |       | 4949  | 4614  | 1.07 | 0.10 | -0.01 | -0.04 |
| YNL098C | RAS2  | 23424 | 21844 | 1.07 | 0.10 | -0.01 | -0.04 |
| YLL027W | ISA1  | 13675 | 12756 | 1.07 | 0.10 | -0.01 | -0.04 |
| YNR027W |       | 3452  | 3220  | 1.07 | 0.10 | -0.01 | -0.04 |
| YMR213W | CEF1  | 1742  | 1625  | 1.07 | 0.10 | -0.01 | -0.05 |
| YGR225W | SPO70 | 442   | 412   | 1.07 | 0.10 | -0.01 | -0.05 |
| YNL292W | PUS4  | 6282  | 5862  | 1.07 | 0.10 | -0.01 | -0.05 |
| YLR280C |       | 2344  | 2188  | 1.07 | 0.10 | -0.01 | -0.05 |
| YMR306W | FKS3  | 1199  | 1119  | 1.07 | 0.10 | -0.01 | -0.05 |
| YGL183C |       | 381   | 356   | 1.07 | 0.10 | -0.01 | -0.05 |
| YGR005C | TFG2  | 20962 | 19566 | 1.07 | 0.10 | -0.01 | -0.05 |
| YBR119W | MUD1  | 6932  | 6471  | 1.07 | 0.10 | -0.01 | -0.05 |
| YER031C | YPT31 | 7359  | 6870  | 1.07 | 0.10 | -0.01 | -0.05 |
| YDR065W |       | 3266  | 3049  | 1.07 | 0.10 | -0.01 | -0.05 |
| YPL117C | IDI1  | 20838 | 19457 | 1.07 | 0.10 | -0.01 | -0.05 |
| YGR167W | CLC1  | 8603  | 8034  | 1.07 | 0.10 | -0.01 | -0.05 |

|         |        |       |       |      |      |       |       |
|---------|--------|-------|-------|------|------|-------|-------|
| YLR217W |        | 14055 | 13127 | 1.07 | 0.10 | -0.01 | -0.05 |
| YAR030C |        | 1565  | 1462  | 1.07 | 0.10 | -0.01 | -0.05 |
| YEL066W | HPA3   | 4171  | 3896  | 1.07 | 0.10 | -0.01 | -0.05 |
| YMR210W |        | 1248  | 1166  | 1.07 | 0.10 | -0.01 | -0.05 |
| YML108W |        | 11594 | 10834 | 1.07 | 0.10 | -0.01 | -0.05 |
| YGL133W |        | 2269  | 2121  | 1.07 | 0.10 | -0.01 | -0.05 |
| YOR127W | RGA1   | 2884  | 2696  | 1.07 | 0.10 | -0.01 | -0.05 |
| YMR024W | MRPL3  | 10883 | 10173 | 1.07 | 0.10 | -0.02 | -0.05 |
| YJL081C | ARP4   | 4093  | 3826  | 1.07 | 0.10 | -0.02 | -0.05 |
| YJR114W |        | 7716  | 7213  | 1.07 | 0.10 | -0.02 | -0.06 |
| YGL056C | SDS23  | 7444  | 6959  | 1.07 | 0.10 | -0.02 | -0.06 |
| YDR265W | PEX10  | 2671  | 2498  | 1.07 | 0.10 | -0.02 | -0.06 |
| YLR253W |        | 6468  | 6049  | 1.07 | 0.10 | -0.02 | -0.06 |
| YNL095C |        | 1619  | 1514  | 1.07 | 0.10 | -0.02 | -0.06 |
| YNL280C | ERG24  | 8224  | 7695  | 1.07 | 0.10 | -0.02 | -0.06 |
| YILO38C | NOT3   | 9143  | 8555  | 1.07 | 0.10 | -0.02 | -0.06 |
| YDL015C |        | 24894 | 23295 | 1.07 | 0.10 | -0.02 | -0.06 |
| YLR317W |        | 2533  | 2371  | 1.07 | 0.10 | -0.02 | -0.06 |
| YMR154C | RIM13  | 2450  | 2293  | 1.07 | 0.10 | -0.02 | -0.06 |
| YMR286W | MRPL33 | 7885  | 7382  | 1.07 | 0.10 | -0.02 | -0.06 |
| YML070W | DAK1   | 5427  | 5081  | 1.07 | 0.10 | -0.02 | -0.06 |
| YDL050C |        | 24798 | 23220 | 1.07 | 0.09 | -0.02 | -0.06 |
| YDL038C |        | 2693  | 2522  | 1.07 | 0.09 | -0.02 | -0.06 |
| YBR255W |        | 10172 | 9526  | 1.07 | 0.09 | -0.02 | -0.06 |
| YKL090W |        | 3839  | 3595  | 1.07 | 0.09 | -0.02 | -0.06 |
| YGL173C | KEM1   | 5245  | 4913  | 1.07 | 0.09 | -0.02 | -0.07 |
| YIL069C | RPS24B | 22230 | 20822 | 1.07 | 0.09 | -0.02 | -0.07 |
| YKL016C | ATP7   | 19504 | 18269 | 1.07 | 0.09 | -0.02 | -0.07 |
| YNR066C |        | 3713  | 3478  | 1.07 | 0.09 | -0.02 | -0.07 |
| YFL041W | FET5   | 7314  | 6851  | 1.07 | 0.09 | -0.02 | -0.07 |
| YJL092W | HPR5   | 3605  | 3377  | 1.07 | 0.09 | -0.02 | -0.07 |
| YNL246W |        | 1933  | 1811  | 1.07 | 0.09 | -0.02 | -0.07 |
| YGL020C |        | 12045 | 11285 | 1.07 | 0.09 | -0.02 | -0.07 |
| YLR424W |        | 5306  | 4971  | 1.07 | 0.09 | -0.02 | -0.07 |
| YDR390C | UBA2   | 7859  | 7364  | 1.07 | 0.09 | -0.02 | -0.07 |
| YPL038W | MET31  | 7784  | 7294  | 1.07 | 0.09 | -0.02 | -0.07 |

|         |        |       |       |      |      |       |       |
|---------|--------|-------|-------|------|------|-------|-------|
| YHR128W | FUR1   | 627   | 588   | 1.07 | 0.09 | -0.02 | -0.07 |
| YBR290W | BSD2   | 6558  | 6146  | 1.07 | 0.09 | -0.02 | -0.07 |
| YDR376W | ARH1   | 6611  | 6196  | 1.07 | 0.09 | -0.02 | -0.07 |
| YLR194C |        | 20276 | 19004 | 1.07 | 0.09 | -0.02 | -0.07 |
| YNL125C | ESBP6  | 6094  | 5712  | 1.07 | 0.09 | -0.02 | -0.07 |
| YNL152W |        | 11010 | 10320 | 1.07 | 0.09 | -0.02 | -0.07 |
| YIRO18W | YAP5   | 7431  | 6966  | 1.07 | 0.09 | -0.02 | -0.07 |
| YBR168W |        | 1746  | 1637  | 1.07 | 0.09 | -0.02 | -0.07 |
| YKL150W | MCR1   | 6871  | 6444  | 1.07 | 0.09 | -0.02 | -0.07 |
| YKL059C |        | 3120  | 2926  | 1.07 | 0.09 | -0.02 | -0.07 |
| YDL214C |        | 455   | 427   | 1.07 | 0.09 | -0.02 | -0.07 |
| YLR398C | SKI2   | 4010  | 3761  | 1.07 | 0.09 | -0.02 | -0.07 |
| YLL055W |        | 2656  | 2492  | 1.07 | 0.09 | -0.02 | -0.07 |
| YDL229W | SSB1   | 2854  | 2678  | 1.07 | 0.09 | -0.02 | -0.07 |
| YMR025W |        | 4301  | 4035  | 1.07 | 0.09 | -0.02 | -0.07 |
| YCRO02C | CDC10  | 12571 | 11795 | 1.07 | 0.09 | -0.02 | -0.07 |
| YOR380W |        | 1620  | 1520  | 1.07 | 0.09 | -0.02 | -0.07 |
| YOR156C | NFI1   | 1441  | 1352  | 1.07 | 0.09 | -0.02 | -0.07 |
| YGL071W | RCS1   | 2577  | 2418  | 1.07 | 0.09 | -0.02 | -0.07 |
| YOR252W |        | 15080 | 14153 | 1.07 | 0.09 | -0.02 | -0.08 |
| YMR294W | JNM1   | 10094 | 9474  | 1.07 | 0.09 | -0.02 | -0.08 |
| YDL069C | CBS1   | 1680  | 1577  | 1.07 | 0.09 | -0.02 | -0.08 |
| YJL008C | CCT8   | 22381 | 21013 | 1.07 | 0.09 | -0.02 | -0.08 |
| YNL339C | YRF1-6 | 1008  | 946   | 1.07 | 0.09 | -0.02 | -0.08 |
| YOR330C | MIP1   | 3330  | 3128  | 1.06 | 0.09 | -0.02 | -0.08 |
| YDL246C |        | 399   | 375   | 1.06 | 0.09 | -0.02 | -0.08 |
| YPL131W | RPL5   | 46865 | 44031 | 1.06 | 0.09 | -0.02 | -0.08 |
| YKRO69W | MET1   | 1389  | 1305  | 1.06 | 0.09 | -0.02 | -0.08 |
| YER118C | SSU81  | 11690 | 10984 | 1.06 | 0.09 | -0.02 | -0.08 |
| YGL242C |        | 9445  | 8875  | 1.06 | 0.09 | -0.02 | -0.08 |
| YLR349W |        | 5280  | 4961  | 1.06 | 0.09 | -0.02 | -0.08 |
| YHR147C | MRPL6  | 4328  | 4067  | 1.06 | 0.09 | -0.02 | -0.08 |
| YOR121C |        | 3080  | 2895  | 1.06 | 0.09 | -0.02 | -0.08 |
| YDR303C |        | 1300  | 1222  | 1.06 | 0.09 | -0.02 | -0.08 |
| YDL009C |        | 4489  | 4220  | 1.06 | 0.09 | -0.02 | -0.08 |
| YBR242W |        | 9847  | 9256  | 1.06 | 0.09 | -0.02 | -0.08 |

|           |        |       |       |      |      |       |       |
|-----------|--------|-------|-------|------|------|-------|-------|
| YDL082W   | RPL13A | 16894 | 15881 | 1.06 | 0.09 | -0.02 | -0.08 |
| YLR054C   |        | 652   | 613   | 1.06 | 0.09 | -0.02 | -0.08 |
| YJR141W   |        | 7136  | 6709  | 1.06 | 0.09 | -0.02 | -0.08 |
| YER056C-A | RPL34A | 29948 | 28158 | 1.06 | 0.09 | -0.02 | -0.09 |
| YNL177C   |        | 8221  | 7731  | 1.06 | 0.09 | -0.02 | -0.09 |
| YOR295W   |        | 5124  | 4819  | 1.06 | 0.09 | -0.02 | -0.09 |
| YLR178C   | TFS1   | 9547  | 8980  | 1.06 | 0.09 | -0.02 | -0.09 |
| YPL043W   | NOP4   | 4581  | 4309  | 1.06 | 0.09 | -0.02 | -0.09 |
| YKR047W   |        | 8932  | 8402  | 1.06 | 0.09 | -0.02 | -0.09 |
| YBL014C   | RRN6   | 5746  | 5407  | 1.06 | 0.09 | -0.02 | -0.09 |
| YPL099C   |        | 3032  | 2854  | 1.06 | 0.09 | -0.03 | -0.09 |
| YDR249C   |        | 372   | 350   | 1.06 | 0.09 | -0.03 | -0.09 |
| YKR030W   |        | 1263  | 1189  | 1.06 | 0.09 | -0.03 | -0.09 |
| YGR147C   | NAT2   | 5810  | 5469  | 1.06 | 0.09 | -0.03 | -0.09 |
| YLR248W   | RCK2   | 11776 | 11085 | 1.06 | 0.09 | -0.03 | -0.09 |
| YLR183C   |        | 15807 | 14882 | 1.06 | 0.09 | -0.03 | -0.09 |
| YML021C   | UNG1   | 4287  | 4037  | 1.06 | 0.09 | -0.03 | -0.09 |
| YFR002W   | NIC96  | 8901  | 8382  | 1.06 | 0.09 | -0.03 | -0.09 |
| YDL224C   | WHI4   | 5542  | 5219  | 1.06 | 0.09 | -0.03 | -0.09 |
| YDR438W   |        | 2465  | 2322  | 1.06 | 0.09 | -0.03 | -0.10 |
| YCL010C   |        | 2085  | 1964  | 1.06 | 0.09 | -0.03 | -0.10 |
| YMR086C-A |        | 1496  | 1409  | 1.06 | 0.09 | -0.03 | -0.10 |
| YAR031W   |        | 2141  | 2017  | 1.06 | 0.09 | -0.03 | -0.10 |
| YPL165C   |        | 935   | 881   | 1.06 | 0.09 | -0.03 | -0.10 |
| YLL048C   | YBT1   | 42405 | 39954 | 1.06 | 0.09 | -0.03 | -0.10 |
| YMR321C   |        | 6474  | 6101  | 1.06 | 0.09 | -0.03 | -0.10 |
| YDR070C   |        | 2313  | 2180  | 1.06 | 0.09 | -0.03 | -0.10 |
| YBR156C   | SLI15  | 25006 | 23572 | 1.06 | 0.09 | -0.03 | -0.10 |
| YFR039C   |        | 3940  | 3714  | 1.06 | 0.09 | -0.03 | -0.10 |
| YBR042C   |        | 2735  | 2579  | 1.06 | 0.08 | -0.03 | -0.10 |
| YKR033C   |        | 1363  | 1285  | 1.06 | 0.08 | -0.03 | -0.10 |
| YEL006W   |        | 833   | 785   | 1.06 | 0.08 | -0.03 | -0.10 |
| YHR084W   | STE12  | 2956  | 2787  | 1.06 | 0.08 | -0.03 | -0.10 |
| YPL042C   | SSN3   | 8790  | 8289  | 1.06 | 0.08 | -0.03 | -0.10 |
| YOL084W   |        | 742   | 700   | 1.06 | 0.08 | -0.03 | -0.10 |
| YCRO29C   |        | 898   | 847   | 1.06 | 0.08 | -0.03 | -0.10 |

|         |       |       |       |      |      |       |       |
|---------|-------|-------|-------|------|------|-------|-------|
| YBL055C |       | 4224  | 3984  | 1.06 | 0.08 | -0.03 | -0.10 |
| YPL122C | TFB2  | 11516 | 10862 | 1.06 | 0.08 | -0.03 | -0.10 |
| YHR004C | NEM1  | 6339  | 5979  | 1.06 | 0.08 | -0.03 | -0.10 |
| YPL090C | RPS6A | 33815 | 31895 | 1.06 | 0.08 | -0.03 | -0.10 |
| YNL028W |       | 1506  | 1421  | 1.06 | 0.08 | -0.03 | -0.10 |
| YPR082C | DIB1  | 12130 | 11442 | 1.06 | 0.08 | -0.03 | -0.10 |
| YBR116C |       | 406   | 383   | 1.06 | 0.08 | -0.03 | -0.10 |
| YBL113C |       | 3385  | 3193  | 1.06 | 0.08 | -0.03 | -0.10 |
| YER173W | RAD24 | 7020  | 6623  | 1.06 | 0.08 | -0.03 | -0.10 |
| YMR247C |       | 2189  | 2065  | 1.06 | 0.08 | -0.03 | -0.10 |
| YDR264C | AKR1  | 5769  | 5444  | 1.06 | 0.08 | -0.03 | -0.10 |
| YJR116W |       | 1856  | 1752  | 1.06 | 0.08 | -0.03 | -0.10 |
| YGL052W |       | 1163  | 1098  | 1.06 | 0.08 | -0.03 | -0.11 |
| YOR388C | FDH1  | 828   | 782   | 1.06 | 0.08 | -0.03 | -0.11 |
| YML069W | POB3  | 9211  | 8695  | 1.06 | 0.08 | -0.03 | -0.11 |
| YOL043C | NTG2  | 5051  | 4769  | 1.06 | 0.08 | -0.03 | -0.11 |
| YOR347C | PYK2  | 4246  | 4009  | 1.06 | 0.08 | -0.03 | -0.11 |
| YCLX12W |       | 9788  | 9242  | 1.06 | 0.08 | -0.03 | -0.11 |
| YBR192W | RIM2  | 2649  | 2502  | 1.06 | 0.08 | -0.03 | -0.11 |
| YDL149W | AUT9  | 2990  | 2824  | 1.06 | 0.08 | -0.03 | -0.11 |
| YML003W |       | 1638  | 1547  | 1.06 | 0.08 | -0.03 | -0.11 |
| YPL118W | MRP51 | 20817 | 19665 | 1.06 | 0.08 | -0.03 | -0.11 |
| YOL057W |       | 14004 | 13230 | 1.06 | 0.08 | -0.03 | -0.11 |
| YOR091W |       | 14655 | 13846 | 1.06 | 0.08 | -0.03 | -0.11 |
| YCR022C |       | 3891  | 3676  | 1.06 | 0.08 | -0.03 | -0.11 |
| YDR482C |       | 876   | 828   | 1.06 | 0.08 | -0.03 | -0.11 |
| YJL216C |       | 1560  | 1474  | 1.06 | 0.08 | -0.03 | -0.11 |
| YOL072W |       | 3625  | 3426  | 1.06 | 0.08 | -0.03 | -0.11 |
| YNL092W |       | 1686  | 1593  | 1.06 | 0.08 | -0.03 | -0.11 |
| YER159C | BUR6  | 7602  | 7185  | 1.06 | 0.08 | -0.03 | -0.11 |
| YPL272C |       | 2064  | 1951  | 1.06 | 0.08 | -0.03 | -0.11 |
| YEL047C |       | 5776  | 5459  | 1.06 | 0.08 | -0.03 | -0.11 |
| YDR125C | ECM18 | 908   | 858   | 1.06 | 0.08 | -0.03 | -0.11 |
| YAR053W |       | 1352  | 1278  | 1.06 | 0.08 | -0.03 | -0.11 |
| YNL096C | RPS7B | 27211 | 25724 | 1.06 | 0.08 | -0.03 | -0.11 |
| YLR051C |       | 25129 | 23757 | 1.06 | 0.08 | -0.03 | -0.11 |

|         |        |       |       |      |      |       |       |
|---------|--------|-------|-------|------|------|-------|-------|
| YOR275C |        | 3623  | 3425  | 1.06 | 0.08 | -0.03 | -0.11 |
| YHR040W |        | 3612  | 3415  | 1.06 | 0.08 | -0.03 | -0.11 |
| YOR119C | RIO1   | 4420  | 4179  | 1.06 | 0.08 | -0.03 | -0.11 |
| YNL097C | PHO23  | 3344  | 3162  | 1.06 | 0.08 | -0.03 | -0.12 |
| YAR037W |        | 2134  | 2018  | 1.06 | 0.08 | -0.03 | -0.12 |
| YJL041W | NSP1   | 686   | 649   | 1.06 | 0.08 | -0.03 | -0.12 |
| YKL069W |        | 6159  | 5827  | 1.06 | 0.08 | -0.03 | -0.12 |
| YML051W | GAL80  | 6018  | 5694  | 1.06 | 0.08 | -0.03 | -0.12 |
| YLL012W |        | 4386  | 4150  | 1.06 | 0.08 | -0.03 | -0.12 |
| YDR346C |        | 5006  | 4738  | 1.06 | 0.08 | -0.03 | -0.12 |
| YLR326W |        | 3489  | 3302  | 1.06 | 0.08 | -0.03 | -0.12 |
| YPRO60C | ARO7   | 26210 | 24808 | 1.06 | 0.08 | -0.03 | -0.12 |
| YPR102C | RPL11A | 36979 | 35002 | 1.06 | 0.08 | -0.03 | -0.12 |
| YJR151C |        | 4335  | 4104  | 1.06 | 0.08 | -0.03 | -0.12 |
| YLR197W | SIK1   | 8499  | 8047  | 1.06 | 0.08 | -0.03 | -0.12 |
| YJL063C | MRPL8  | 8841  | 8371  | 1.06 | 0.08 | -0.03 | -0.12 |
| YGR274C | TAF145 | 9185  | 8698  | 1.06 | 0.08 | -0.03 | -0.12 |
| YKL176C |        | 2589  | 2452  | 1.06 | 0.08 | -0.03 | -0.12 |
| YOR073W |        | 2633  | 2494  | 1.06 | 0.08 | -0.03 | -0.12 |
| YMR269W |        | 9352  | 8859  | 1.06 | 0.08 | -0.03 | -0.12 |
| YCL042W |        | 3014  | 2856  | 1.06 | 0.08 | -0.03 | -0.13 |
| YLR071C | RGR1   | 1833  | 1737  | 1.06 | 0.08 | -0.03 | -0.13 |
| YGR148C | RPL24B | 36902 | 34966 | 1.06 | 0.08 | -0.03 | -0.13 |
| YHR105W |        | 4551  | 4313  | 1.06 | 0.08 | -0.03 | -0.13 |
| YDR396W |        | 9465  | 8971  | 1.06 | 0.08 | -0.03 | -0.13 |
| YCR034W | FEN1   | 20991 | 19895 | 1.06 | 0.08 | -0.04 | -0.13 |
| YJL132W |        | 4709  | 4464  | 1.05 | 0.08 | -0.04 | -0.13 |
| YKL113C | RAD27  | 11047 | 10472 | 1.05 | 0.08 | -0.04 | -0.13 |
| YLR007W |        | 4591  | 4352  | 1.05 | 0.08 | -0.04 | -0.13 |
| YGR150C |        | 2094  | 1986  | 1.05 | 0.08 | -0.04 | -0.13 |
| YGL174W |        | 5375  | 5098  | 1.05 | 0.08 | -0.04 | -0.13 |
| YLR212C | TUB4   | 10833 | 10275 | 1.05 | 0.08 | -0.04 | -0.13 |
| YAL022C | FUN26  | 10786 | 10233 | 1.05 | 0.08 | -0.04 | -0.13 |
| YLR164W |        | 980   | 930   | 1.05 | 0.08 | -0.04 | -0.13 |
| YPL023C | MET12  | 10876 | 10320 | 1.05 | 0.08 | -0.04 | -0.13 |
| YEL003W | GIM4   | 20720 | 19661 | 1.05 | 0.08 | -0.04 | -0.13 |



|           |        |       |       |      |      |       |       |
|-----------|--------|-------|-------|------|------|-------|-------|
| YGR030C   | POP6   | 3239  | 3073  | 1.05 | 0.08 | -0.04 | -0.13 |
| YBL016W   | FUS3   | 12087 | 11473 | 1.05 | 0.08 | -0.04 | -0.13 |
| YGL097W   | SRM1   | 14495 | 13758 | 1.05 | 0.08 | -0.04 | -0.13 |
| YGR214W   | RPSOA  | 30899 | 29330 | 1.05 | 0.08 | -0.04 | -0.14 |
| YPL109C   |        | 753   | 715   | 1.05 | 0.08 | -0.04 | -0.14 |
| YDL036C   |        | 5098  | 4839  | 1.05 | 0.08 | -0.04 | -0.14 |
| YLR010C   |        | 3609  | 3426  | 1.05 | 0.08 | -0.04 | -0.14 |
| YMR233W   |        | 2984  | 2833  | 1.05 | 0.08 | -0.04 | -0.14 |
| YCL058C   |        | 6429  | 6104  | 1.05 | 0.07 | -0.04 | -0.14 |
| YGL074C   |        | 785   | 745   | 1.05 | 0.07 | -0.04 | -0.14 |
| YBR191W   | RPL21A | 40398 | 38355 | 1.05 | 0.07 | -0.04 | -0.14 |
| YIR027C   | DAL1   | 1083  | 1028  | 1.05 | 0.07 | -0.04 | -0.14 |
| YGR187C   | HGH1   | 10480 | 9951  | 1.05 | 0.07 | -0.04 | -0.14 |
| YGR072W   | UPF3   | 6193  | 5881  | 1.05 | 0.07 | -0.04 | -0.14 |
| YDL247W   |        | 604   | 574   | 1.05 | 0.07 | -0.04 | -0.14 |
| YERO01W   | MNN1   | 5675  | 5391  | 1.05 | 0.07 | -0.04 | -0.14 |
| YAL034W-A | MTW1   | 1839  | 1747  | 1.05 | 0.07 | -0.04 | -0.14 |
| YKL101W   | HSL1   | 1636  | 1555  | 1.05 | 0.07 | -0.04 | -0.14 |
| YJR143C   | PMT4   | 13018 | 12372 | 1.05 | 0.07 | -0.04 | -0.14 |
| YCR043C   |        | 13871 | 13183 | 1.05 | 0.07 | -0.04 | -0.14 |
| YGR133W   | PEX4   | 1416  | 1346  | 1.05 | 0.07 | -0.04 | -0.14 |
| YGR053C   |        | 1822  | 1732  | 1.05 | 0.07 | -0.04 | -0.14 |
| YLR149C   |        | 1785  | 1697  | 1.05 | 0.07 | -0.04 | -0.14 |
| YERO66W   |        | 1977  | 1879  | 1.05 | 0.07 | -0.04 | -0.14 |
| YHR143W   |        | 2551  | 2425  | 1.05 | 0.07 | -0.04 | -0.14 |
| YMR165C   | SMP2   | 826   | 785   | 1.05 | 0.07 | -0.04 | -0.14 |
| YLR298C   | YHC1   | 5661  | 5383  | 1.05 | 0.07 | -0.04 | -0.14 |
| YJR146W   |        | 4470  | 4251  | 1.05 | 0.07 | -0.04 | -0.14 |
| YBR278W   | DPB3   | 3275  | 3115  | 1.05 | 0.07 | -0.04 | -0.15 |
| YPRO04C   |        | 18912 | 17986 | 1.05 | 0.07 | -0.04 | -0.15 |
| YKLO42W   | SPC42  | 4098  | 3898  | 1.05 | 0.07 | -0.04 | -0.15 |
| YFR032C   |        | 924   | 879   | 1.05 | 0.07 | -0.04 | -0.15 |
| YMR174C   | PAI3   | 1370  | 1303  | 1.05 | 0.07 | -0.04 | -0.15 |
| YOR386W   | PHR1   | 1292  | 1229  | 1.05 | 0.07 | -0.04 | -0.15 |
| YOR342C   |        | 21352 | 20313 | 1.05 | 0.07 | -0.04 | -0.15 |
| YKRO43C   |        | 20815 | 19803 | 1.05 | 0.07 | -0.04 | -0.15 |

|         |       |       |       |      |      |       |       |
|---------|-------|-------|-------|------|------|-------|-------|
| YBL029W |       | 1591  | 1514  | 1.05 | 0.07 | -0.04 | -0.15 |
| YGL045W |       | 2636  | 2508  | 1.05 | 0.07 | -0.04 | -0.15 |
| YLR245C | CDD1  | 2571  | 2447  | 1.05 | 0.07 | -0.04 | -0.15 |
| YCLX11W |       | 2261  | 2152  | 1.05 | 0.07 | -0.04 | -0.15 |
| YCR098C | GIT1  | 1498  | 1426  | 1.05 | 0.07 | -0.04 | -0.15 |
| YGL029W | CGR1  | 18477 | 17586 | 1.05 | 0.07 | -0.04 | -0.15 |
| YPL182C |       | 5623  | 5352  | 1.05 | 0.07 | -0.04 | -0.15 |
| YDR354W | TRP4  | 11363 | 10817 | 1.05 | 0.07 | -0.04 | -0.15 |
| YAR002W |       | 3438  | 3273  | 1.05 | 0.07 | -0.04 | -0.15 |
| YNL161W | CBK1  | 4906  | 4671  | 1.05 | 0.07 | -0.04 | -0.15 |
| YDR383C |       | 5926  | 5642  | 1.05 | 0.07 | -0.04 | -0.15 |
| YHR131C |       | 3312  | 3154  | 1.05 | 0.07 | -0.04 | -0.15 |
| YMR308C | PSE1  | 18477 | 17594 | 1.05 | 0.07 | -0.04 | -0.15 |
| YKL070W |       | 3434  | 3270  | 1.05 | 0.07 | -0.04 | -0.15 |
| YKL062W | MSN4  | 5187  | 4939  | 1.05 | 0.07 | -0.04 | -0.15 |
| YHR144C | DCD1  | 20470 | 19494 | 1.05 | 0.07 | -0.04 | -0.15 |
| YOL090W | MSH2  | 8671  | 8258  | 1.05 | 0.07 | -0.04 | -0.15 |
| YPR187W | RPO26 | 16618 | 15827 | 1.05 | 0.07 | -0.04 | -0.15 |
| YDR448W | ADA2  | 3694  | 3518  | 1.05 | 0.07 | -0.04 | -0.15 |
| YOL060C | AMI3  | 7074  | 6738  | 1.05 | 0.07 | -0.04 | -0.15 |
| YGR195W | SKI6  | 6096  | 5806  | 1.05 | 0.07 | -0.04 | -0.15 |
| YNL035C |       | 5614  | 5348  | 1.05 | 0.07 | -0.04 | -0.15 |
| YCRO60W |       | 3497  | 3331  | 1.05 | 0.07 | -0.04 | -0.15 |
| YGL243W | TAD1  | 5636  | 5369  | 1.05 | 0.07 | -0.04 | -0.15 |
| YLL067C |       | 12548 | 11953 | 1.05 | 0.07 | -0.04 | -0.15 |
| YEL033W |       | 11018 | 10496 | 1.05 | 0.07 | -0.04 | -0.15 |
| YOR278W | HEM4  | 8358  | 7962  | 1.05 | 0.07 | -0.04 | -0.15 |
| YILO20C | HIS6  | 14884 | 14179 | 1.05 | 0.07 | -0.04 | -0.15 |
| YGL185C |       | 5322  | 5070  | 1.05 | 0.07 | -0.04 | -0.15 |
| YGR244C | LSC2  | 809   | 771   | 1.05 | 0.07 | -0.04 | -0.15 |
| YPL236C |       | 4643  | 4423  | 1.05 | 0.07 | -0.04 | -0.15 |
| YBR060C | ORC2  | 2405  | 2291  | 1.05 | 0.07 | -0.04 | -0.15 |
| YDR150W | NUM1  | 1948  | 1856  | 1.05 | 0.07 | -0.04 | -0.15 |
| YDR111C |       | 1821  | 1735  | 1.05 | 0.07 | -0.04 | -0.16 |
| YNL311C |       | 8660  | 8253  | 1.05 | 0.07 | -0.04 | -0.16 |
| YNL117W | MLS1  | 1210  | 1153  | 1.05 | 0.07 | -0.04 | -0.16 |

|         |       |       |       |      |      |       |       |
|---------|-------|-------|-------|------|------|-------|-------|
| YER003C | PMI40 | 6235  | 5943  | 1.05 | 0.07 | -0.04 | -0.16 |
| YBR170C | NPL4  | 3519  | 3354  | 1.05 | 0.07 | -0.04 | -0.16 |
| YOR039W | CKB2  | 17422 | 16606 | 1.05 | 0.07 | -0.04 | -0.16 |
| YHR188C |       | 1705  | 1625  | 1.05 | 0.07 | -0.04 | -0.16 |
| YLR361C |       | 1587  | 1513  | 1.05 | 0.07 | -0.04 | -0.16 |
| YJR113C |       | 3210  | 3060  | 1.05 | 0.07 | -0.04 | -0.16 |
| YPL260W |       | 14316 | 13649 | 1.05 | 0.07 | -0.04 | -0.16 |
| YHL024W | NOS1  | 1919  | 1830  | 1.05 | 0.07 | -0.04 | -0.16 |
| YMR027W | HRT2  | 10727 | 10229 | 1.05 | 0.07 | -0.04 | -0.16 |
| YER156C |       | 17967 | 17133 | 1.05 | 0.07 | -0.04 | -0.16 |
| YIL017W |       | 1922  | 1833  | 1.05 | 0.07 | -0.04 | -0.16 |
| YBR275C | RIF1  | 1265  | 1206  | 1.05 | 0.07 | -0.04 | -0.16 |
| YNL314W | DAL82 | 3126  | 2982  | 1.05 | 0.07 | -0.04 | -0.16 |
| YJL055W |       | 10081 | 9615  | 1.05 | 0.07 | -0.04 | -0.16 |
| YNL222W | SSU72 | 4759  | 4539  | 1.05 | 0.07 | -0.04 | -0.16 |
| YJR058C | APS2  | 7036  | 6712  | 1.05 | 0.07 | -0.04 | -0.16 |
| YJR117W | STE24 | 3200  | 3053  | 1.05 | 0.07 | -0.04 | -0.16 |
| YJL058C |       | 3126  | 2983  | 1.05 | 0.07 | -0.04 | -0.16 |
| YFL022C | FRS2  | 15016 | 14329 | 1.05 | 0.07 | -0.04 | -0.16 |
| YIL067C |       | 1899  | 1812  | 1.05 | 0.07 | -0.04 | -0.16 |
| YDR330W |       | 5200  | 4963  | 1.05 | 0.07 | -0.05 | -0.16 |
| YNL190W |       | 29152 | 27823 | 1.05 | 0.07 | -0.05 | -0.16 |
| YFL021W | GAT1  | 8891  | 8487  | 1.05 | 0.07 | -0.05 | -0.16 |
| YGR286C | BIO2  | 6489  | 6195  | 1.05 | 0.07 | -0.05 | -0.17 |
| YDL065C | PEX19 | 5550  | 5299  | 1.05 | 0.07 | -0.05 | -0.17 |
| YDR248C |       | 390   | 372   | 1.05 | 0.07 | -0.05 | -0.17 |
| YGL214W |       | 2212  | 2112  | 1.05 | 0.07 | -0.05 | -0.17 |
| YJR077C | MIR1  | 2175  | 2077  | 1.05 | 0.07 | -0.05 | -0.17 |
| YPL178W | MUD13 | 886   | 846   | 1.05 | 0.07 | -0.05 | -0.17 |
| YGR111W |       | 3453  | 3298  | 1.05 | 0.07 | -0.05 | -0.17 |
| YNL039W | TFC5  | 4392  | 4195  | 1.05 | 0.07 | -0.05 | -0.17 |
| YIL078W | THS1  | 36485 | 34847 | 1.05 | 0.07 | -0.05 | -0.17 |
| YPR048W | TAH18 | 9109  | 8700  | 1.05 | 0.07 | -0.05 | -0.17 |
| YPL248C | GAL4  | 2344  | 2240  | 1.05 | 0.07 | -0.05 | -0.17 |
| YMR207C | HFA1  | 822   | 785   | 1.05 | 0.07 | -0.05 | -0.17 |
| YBR037C | SCO1  | 2617  | 2500  | 1.05 | 0.07 | -0.05 | -0.17 |

|           |       |       |       |      |      |       |       |
|-----------|-------|-------|-------|------|------|-------|-------|
| YNL291C   | MID1  | 11680 | 11160 | 1.05 | 0.07 | -0.05 | -0.17 |
| YDL111C   | RRP42 | 9858  | 9419  | 1.05 | 0.07 | -0.05 | -0.17 |
| YGR015C   |       | 6280  | 6001  | 1.05 | 0.07 | -0.05 | -0.17 |
| YBL005W-A |       | 46044 | 43998 | 1.05 | 0.07 | -0.05 | -0.17 |
| YDL204W   |       | 2707  | 2587  | 1.05 | 0.07 | -0.05 | -0.17 |
| YML018C   |       | 16253 | 15534 | 1.05 | 0.07 | -0.05 | -0.17 |
| YKR093W   | PTR2  | 11143 | 10650 | 1.05 | 0.07 | -0.05 | -0.17 |
| YDR087C   | RRP1  | 10115 | 9670  | 1.05 | 0.06 | -0.05 | -0.17 |
| YLR030W   |       | 1403  | 1341  | 1.05 | 0.06 | -0.05 | -0.17 |
| YGL231C   |       | 22694 | 21698 | 1.05 | 0.06 | -0.05 | -0.17 |
| YIL166C   |       | 1362  | 1302  | 1.05 | 0.06 | -0.05 | -0.17 |
| YNL148C   | ALF1  | 3911  | 3740  | 1.05 | 0.06 | -0.05 | -0.17 |
| YDR368W   | YPR1  | 1713  | 1638  | 1.05 | 0.06 | -0.05 | -0.17 |
| YNR044W   | AGA1  | 823   | 787   | 1.05 | 0.06 | -0.05 | -0.17 |
| YLR461W   | PAU4  | 912   | 872   | 1.05 | 0.06 | -0.05 | -0.17 |
| YJR125C   | ENT3  | 8015  | 7665  | 1.05 | 0.06 | -0.05 | -0.17 |
| YHR008C   | SOD2  | 4319  | 4130  | 1.05 | 0.06 | -0.05 | -0.17 |
| YIRO29W   | DAL2  | 1441  | 1378  | 1.05 | 0.06 | -0.05 | -0.17 |
| YJL038C   |       | 1303  | 1246  | 1.05 | 0.06 | -0.05 | -0.17 |
| YBR123C   | TFC1  | 6078  | 5813  | 1.05 | 0.06 | -0.05 | -0.17 |
| YJL056C   | ZAP1  | 4298  | 4111  | 1.05 | 0.06 | -0.05 | -0.18 |
| YOR180C   | DCI1  | 3680  | 3520  | 1.05 | 0.06 | -0.05 | -0.18 |
| YOL054W   |       | 4719  | 4514  | 1.05 | 0.06 | -0.05 | -0.18 |
| YBL093C   | ROX3  | 13690 | 13096 | 1.05 | 0.06 | -0.05 | -0.18 |
| YLR146C   | SPE4  | 5028  | 4810  | 1.05 | 0.06 | -0.05 | -0.18 |
| YDR329C   | PEX3  | 2712  | 2595  | 1.05 | 0.06 | -0.05 | -0.18 |
| YOR036W   | PEP12 | 3457  | 3308  | 1.05 | 0.06 | -0.05 | -0.18 |
| YOR132W   | VPS17 | 3345  | 3201  | 1.05 | 0.06 | -0.05 | -0.18 |
| YCLX07W   |       | 763   | 730   | 1.04 | 0.06 | -0.05 | -0.18 |
| YOR183W   |       | 988   | 946   | 1.04 | 0.06 | -0.05 | -0.18 |
| YPL223C   | GRE1  | 1329  | 1272  | 1.04 | 0.06 | -0.05 | -0.18 |
| YLR355C   | ILV5  | 25047 | 23981 | 1.04 | 0.06 | -0.05 | -0.18 |
| YLR360W   | VPS38 | 4079  | 3906  | 1.04 | 0.06 | -0.05 | -0.18 |
| YMR208W   | ERG12 | 5787  | 5541  | 1.04 | 0.06 | -0.05 | -0.18 |
| YOR087W   |       | 5768  | 5523  | 1.04 | 0.06 | -0.05 | -0.18 |
| YGL033W   | HOP2  | 1065  | 1020  | 1.04 | 0.06 | -0.05 | -0.18 |

|         |       |       |       |      |      |       |       |
|---------|-------|-------|-------|------|------|-------|-------|
| YPR131C | NAT3  | 4573  | 4380  | 1.04 | 0.06 | -0.05 | -0.18 |
| YDR304C | CYP5  | 6189  | 5928  | 1.04 | 0.06 | -0.05 | -0.18 |
| YLR283W |       | 4191  | 4015  | 1.04 | 0.06 | -0.05 | -0.18 |
| YMR091C | NPL6  | 12395 | 11874 | 1.04 | 0.06 | -0.05 | -0.18 |
| YBL032W |       | 12999 | 12453 | 1.04 | 0.06 | -0.05 | -0.18 |
| YML035C | AMD1  | 15157 | 14520 | 1.04 | 0.06 | -0.05 | -0.18 |
| YEL020C |       | 5470  | 5240  | 1.04 | 0.06 | -0.05 | -0.18 |
| YNR055C | HOL1  | 4961  | 4754  | 1.04 | 0.06 | -0.05 | -0.19 |
| YER148W | SPT15 | 23912 | 22916 | 1.04 | 0.06 | -0.05 | -0.19 |
| YKL183W |       | 2354  | 2256  | 1.04 | 0.06 | -0.05 | -0.19 |
| YLL058W |       | 2794  | 2678  | 1.04 | 0.06 | -0.05 | -0.19 |
| YGR066C |       | 902   | 865   | 1.04 | 0.06 | -0.05 | -0.19 |
| YGR149W |       | 2120  | 2033  | 1.04 | 0.06 | -0.05 | -0.19 |
| YPL168W |       | 6189  | 5934  | 1.04 | 0.06 | -0.05 | -0.19 |
| YML114C |       | 5388  | 5166  | 1.04 | 0.06 | -0.05 | -0.19 |
| YMR155W |       | 4124  | 3955  | 1.04 | 0.06 | -0.05 | -0.19 |
| YDR244W | PEX5  | 510   | 489   | 1.04 | 0.06 | -0.05 | -0.19 |
| YOR316C | COT1  | 5345  | 5126  | 1.04 | 0.06 | -0.05 | -0.19 |
| YNR039C |       | 3230  | 3098  | 1.04 | 0.06 | -0.05 | -0.19 |
| YHR160C | PEX18 | 7267  | 6970  | 1.04 | 0.06 | -0.05 | -0.19 |
| YNL269W |       | 1239  | 1188  | 1.04 | 0.06 | -0.05 | -0.19 |
| YML085C | TUB1  | 4500  | 4317  | 1.04 | 0.06 | -0.05 | -0.19 |
| YKL114C | APN1  | 5307  | 5091  | 1.04 | 0.06 | -0.05 | -0.19 |
| YMR102C |       | 3463  | 3322  | 1.04 | 0.06 | -0.05 | -0.19 |
| YPL184C |       | 8137  | 7806  | 1.04 | 0.06 | -0.05 | -0.19 |
| YLR404W |       | 4809  | 4614  | 1.04 | 0.06 | -0.05 | -0.19 |
| YPR201W | ARR3  | 2593  | 2488  | 1.04 | 0.06 | -0.05 | -0.19 |
| YEL072W |       | 3500  | 3358  | 1.04 | 0.06 | -0.05 | -0.19 |
| YOR023C | AHC1  | 6424  | 6164  | 1.04 | 0.06 | -0.05 | -0.19 |
| YJR162C |       | 1770  | 1699  | 1.04 | 0.06 | -0.05 | -0.19 |
| YPR204W |       | 13770 | 13218 | 1.04 | 0.06 | -0.05 | -0.19 |
| YLR417W | VPS36 | 2801  | 2689  | 1.04 | 0.06 | -0.05 | -0.19 |
| YGL152C |       | 2398  | 2302  | 1.04 | 0.06 | -0.05 | -0.19 |
| YDL166C |       | 10011 | 9611  | 1.04 | 0.06 | -0.05 | -0.19 |
| YOR221C | MCT1  | 678   | 651   | 1.04 | 0.06 | -0.05 | -0.20 |
| YNL319W |       | 1867  | 1793  | 1.04 | 0.06 | -0.05 | -0.20 |

|         |        |       |       |      |      |       |       |
|---------|--------|-------|-------|------|------|-------|-------|
| YNR049C | MSO1   | 4421  | 4245  | 1.04 | 0.06 | -0.05 | -0.20 |
| YIL116W | HIS5   | 15050 | 14452 | 1.04 | 0.06 | -0.05 | -0.20 |
| YHR051W | COX6   | 6931  | 6656  | 1.04 | 0.06 | -0.05 | -0.20 |
| YDL040C | NAT1   | 5580  | 5359  | 1.04 | 0.06 | -0.05 | -0.20 |
| YCL041C |        | 3709  | 3562  | 1.04 | 0.06 | -0.05 | -0.20 |
| YLR139C | SLS1   | 3005  | 2886  | 1.04 | 0.06 | -0.05 | -0.20 |
| YGL177W |        | 995   | 956   | 1.04 | 0.06 | -0.05 | -0.20 |
| YDL054C |        | 8895  | 8545  | 1.04 | 0.06 | -0.05 | -0.20 |
| YJR155W | AAD10  | 1929  | 1853  | 1.04 | 0.06 | -0.05 | -0.20 |
| YJL163C |        | 5415  | 5202  | 1.04 | 0.06 | -0.05 | -0.20 |
| YLR029C | RPL15A | 46273 | 44458 | 1.04 | 0.06 | -0.05 | -0.20 |
| YIL021W | RPB3   | 6596  | 6338  | 1.04 | 0.06 | -0.05 | -0.20 |
| YDR280W | RRP45  | 21630 | 20785 | 1.04 | 0.06 | -0.05 | -0.20 |
| YOL123W | HRP1   | 5125  | 4925  | 1.04 | 0.06 | -0.05 | -0.20 |
| YIL065C |        | 2048  | 1968  | 1.04 | 0.06 | -0.06 | -0.20 |
| YOR267C |        | 3620  | 3479  | 1.04 | 0.06 | -0.06 | -0.20 |
| YCL025C | AGP1   | 7141  | 6864  | 1.04 | 0.06 | -0.06 | -0.20 |
| YIL075C | RPN2   | 12071 | 11603 | 1.04 | 0.06 | -0.06 | -0.20 |
| YOR010C | TIR2   | 1092  | 1050  | 1.04 | 0.06 | -0.06 | -0.20 |
| YEL028W |        | 5047  | 4852  | 1.04 | 0.06 | -0.06 | -0.20 |
| YPL205C |        | 1814  | 1744  | 1.04 | 0.06 | -0.06 | -0.20 |
| YJR085C |        | 13583 | 13059 | 1.04 | 0.06 | -0.06 | -0.20 |
| YBR283C | SSH1   | 42599 | 40956 | 1.04 | 0.06 | -0.06 | -0.20 |
| YML015C | TAF40  | 3383  | 3253  | 1.04 | 0.06 | -0.06 | -0.20 |
| YLR449W | FPR4   | 12612 | 12127 | 1.04 | 0.06 | -0.06 | -0.20 |
| YKL081W | TEF4   | 7847  | 7545  | 1.04 | 0.06 | -0.06 | -0.20 |
| YGR240C | PFK1   | 31832 | 30608 | 1.04 | 0.06 | -0.06 | -0.20 |
| YPL254W | HFI1   | 3290  | 3164  | 1.04 | 0.06 | -0.06 | -0.20 |
| YJR063W | RPA12  | 9742  | 9369  | 1.04 | 0.06 | -0.06 | -0.20 |
| YLR436C | ECM30  | 8880  | 8541  | 1.04 | 0.06 | -0.06 | -0.20 |
| YKL139W | CTK1   | 1698  | 1633  | 1.04 | 0.06 | -0.06 | -0.20 |
| YHR029C |        | 9430  | 9070  | 1.04 | 0.06 | -0.06 | -0.20 |
| YGR262C |        | 7437  | 7153  | 1.04 | 0.06 | -0.06 | -0.20 |
| YHR007C | ERG11  | 46934 | 45145 | 1.04 | 0.06 | -0.06 | -0.20 |
| YPR153W |        | 2786  | 2680  | 1.04 | 0.06 | -0.06 | -0.21 |
| YPL262W | FUM1   | 10427 | 10031 | 1.04 | 0.06 | -0.06 | -0.21 |

|         |       |       |       |      |      |       |       |
|---------|-------|-------|-------|------|------|-------|-------|
| YJR088C |       | 6399  | 6157  | 1.04 | 0.06 | -0.06 | -0.21 |
| YAL066W |       | 785   | 755   | 1.04 | 0.06 | -0.06 | -0.21 |
| YCL021W |       | 2912  | 2802  | 1.04 | 0.06 | -0.06 | -0.21 |
| YIL051C | MMD1  | 11245 | 10822 | 1.04 | 0.06 | -0.06 | -0.21 |
| YNL295W |       | 2399  | 2309  | 1.04 | 0.06 | -0.06 | -0.21 |
| YER026C | CHO1  | 25363 | 24410 | 1.04 | 0.06 | -0.06 | -0.21 |
| YDR001C | NTH1  | 749   | 721   | 1.04 | 0.06 | -0.06 | -0.21 |
| YOR113W | AZF1  | 2056  | 1979  | 1.04 | 0.06 | -0.06 | -0.21 |
| YMR016C | SOK2  | 6874  | 6616  | 1.04 | 0.06 | -0.06 | -0.21 |
| YFRO48W |       | 6219  | 5986  | 1.04 | 0.06 | -0.06 | -0.21 |
| YLR440C |       | 6391  | 6153  | 1.04 | 0.05 | -0.06 | -0.21 |
| YPL270W | MDL2  | 4298  | 4138  | 1.04 | 0.05 | -0.06 | -0.21 |
| YJL011C |       | 5050  | 4862  | 1.04 | 0.05 | -0.06 | -0.21 |
| YEL067C |       | 3835  | 3692  | 1.04 | 0.05 | -0.06 | -0.21 |
| YCR023C |       | 4967  | 4783  | 1.04 | 0.05 | -0.06 | -0.21 |
| YLR097C |       | 11439 | 11021 | 1.04 | 0.05 | -0.06 | -0.21 |
| YLR284C | ECI1  | 3073  | 2961  | 1.04 | 0.05 | -0.06 | -0.21 |
| YDR132C |       | 6930  | 6678  | 1.04 | 0.05 | -0.06 | -0.21 |
| YJL102W | MEF2  | 4998  | 4817  | 1.04 | 0.05 | -0.06 | -0.22 |
| YKL208W | CBT1  | 2373  | 2288  | 1.04 | 0.05 | -0.06 | -0.22 |
| YMR115W |       | 5120  | 4936  | 1.04 | 0.05 | -0.06 | -0.22 |
| YDL104C | QRI7  | 4902  | 4727  | 1.04 | 0.05 | -0.06 | -0.22 |
| YLR249W | YEF3  | 34809 | 33569 | 1.04 | 0.05 | -0.06 | -0.22 |
| YBR176W | ECM31 | 1841  | 1776  | 1.04 | 0.05 | -0.06 | -0.22 |
| YDR311W | TFB1  | 399   | 385   | 1.04 | 0.05 | -0.06 | -0.22 |
| YJL218W |       | 1776  | 1713  | 1.04 | 0.05 | -0.06 | -0.22 |
| YDL089W |       | 811   | 782   | 1.04 | 0.05 | -0.06 | -0.22 |
| YDR490C | PKH1  | 1003  | 968   | 1.04 | 0.05 | -0.06 | -0.22 |
| YCR052W | RSC6  | 5295  | 5108  | 1.04 | 0.05 | -0.06 | -0.22 |
| YMR181C |       | 6346  | 6123  | 1.04 | 0.05 | -0.06 | -0.22 |
| YJL223C | PAU1  | 990   | 955   | 1.04 | 0.05 | -0.06 | -0.22 |
| YIR034C | LYS1  | 16708 | 16123 | 1.04 | 0.05 | -0.06 | -0.22 |
| YJR069C | HAM1  | 4779  | 4612  | 1.04 | 0.05 | -0.06 | -0.22 |
| YCR068W |       | 1211  | 1169  | 1.04 | 0.05 | -0.06 | -0.22 |
| YLR078C | BOS1  | 6533  | 6306  | 1.04 | 0.05 | -0.06 | -0.22 |
| YOR044W |       | 1630  | 1573  | 1.04 | 0.05 | -0.06 | -0.22 |

|           |        |       |       |      |      |       |       |
|-----------|--------|-------|-------|------|------|-------|-------|
| YKL023W   |        | 1467  | 1416  | 1.04 | 0.05 | -0.06 | -0.22 |
| YJL119C   |        | 975   | 941   | 1.04 | 0.05 | -0.06 | -0.22 |
| YDR404C   | RPB7   | 9087  | 8773  | 1.04 | 0.05 | -0.06 | -0.22 |
| YBL026W   | LSM2   | 13277 | 12819 | 1.04 | 0.05 | -0.06 | -0.22 |
| YGL018C   | JAC1   | 1568  | 1514  | 1.04 | 0.05 | -0.06 | -0.22 |
| YJR086W   | STE18  | 5304  | 5122  | 1.04 | 0.05 | -0.06 | -0.23 |
| YMR246W   | FAA4   | 9131  | 8817  | 1.04 | 0.05 | -0.06 | -0.23 |
| YOL048C   |        | 3489  | 3369  | 1.04 | 0.05 | -0.06 | -0.23 |
| YDR392W   | SPT3   | 5728  | 5532  | 1.04 | 0.05 | -0.06 | -0.23 |
| YKL064W   | MNR2   | 6086  | 5878  | 1.04 | 0.05 | -0.06 | -0.23 |
| YDR029W   |        | 597   | 577   | 1.04 | 0.05 | -0.06 | -0.23 |
| YDL115C   |        | 2448  | 2365  | 1.04 | 0.05 | -0.06 | -0.23 |
| YLR229C   | CDC42  | 29951 | 28935 | 1.04 | 0.05 | -0.06 | -0.23 |
| YGL233W   | SEC15  | 10457 | 10102 | 1.04 | 0.05 | -0.06 | -0.23 |
| YMR045C   |        | 7047  | 6809  | 1.03 | 0.05 | -0.06 | -0.23 |
| YDL177C   |        | 7322  | 7075  | 1.03 | 0.05 | -0.06 | -0.23 |
| YOL107W   |        | 4276  | 4132  | 1.03 | 0.05 | -0.06 | -0.23 |
| YKL026C   |        | 2185  | 2111  | 1.03 | 0.05 | -0.06 | -0.23 |
| YEL049W   | PAU2   | 1260  | 1218  | 1.03 | 0.05 | -0.06 | -0.23 |
| YER045C   |        | 2098  | 2028  | 1.03 | 0.05 | -0.06 | -0.23 |
| YLR402W   |        | 800   | 773   | 1.03 | 0.05 | -0.06 | -0.23 |
| YBR212W   | NGR1   | 4830  | 4669  | 1.03 | 0.05 | -0.06 | -0.23 |
| YER066C-A |        | 1475  | 1426  | 1.03 | 0.05 | -0.06 | -0.23 |
| YKL154W   | SRP102 | 8688  | 8401  | 1.03 | 0.05 | -0.06 | -0.23 |
| YGL253W   | HXK2   | 37435 | 36203 | 1.03 | 0.05 | -0.06 | -0.23 |
| YLL010C   |        | 3424  | 3312  | 1.03 | 0.05 | -0.06 | -0.23 |
| YDR161W   | TCI1   | 39162 | 37878 | 1.03 | 0.05 | -0.06 | -0.23 |
| YOL086C   | ADH1   | 33737 | 32632 | 1.03 | 0.05 | -0.06 | -0.23 |
| YDR175C   |        | 22236 | 21509 | 1.03 | 0.05 | -0.06 | -0.23 |
| YLR268W   | SEC22  | 15855 | 15338 | 1.03 | 0.05 | -0.06 | -0.23 |
| YLR467W   | YRF1-5 | 5821  | 5633  | 1.03 | 0.05 | -0.07 | -0.24 |
| YLR250W   | SSP120 | 15884 | 15372 | 1.03 | 0.05 | -0.07 | -0.24 |
| YBL021C   | HAP3   | 3182  | 3080  | 1.03 | 0.05 | -0.07 | -0.24 |
| YBL011W   | SCT1   | 4865  | 4709  | 1.03 | 0.05 | -0.07 | -0.24 |
| YER116C   |        | 5435  | 5261  | 1.03 | 0.05 | -0.07 | -0.24 |
| YDR045C   | RPC11  | 3100  | 3001  | 1.03 | 0.05 | -0.07 | -0.24 |



|         |       |       |       |      |      |       |       |
|---------|-------|-------|-------|------|------|-------|-------|
| YMR188C |       | 14436 | 13975 | 1.03 | 0.05 | -0.07 | -0.24 |
| YPR050C |       | 7531  | 7292  | 1.03 | 0.05 | -0.07 | -0.24 |
| YJR107W |       | 1608  | 1557  | 1.03 | 0.05 | -0.07 | -0.24 |
| YMR203W | TOM40 | 5204  | 5041  | 1.03 | 0.05 | -0.07 | -0.24 |
| YPL110C |       | 3390  | 3284  | 1.03 | 0.05 | -0.07 | -0.24 |
| YLR341W |       | 1995  | 1932  | 1.03 | 0.05 | -0.07 | -0.24 |
| YBR159W |       | 8692  | 8421  | 1.03 | 0.05 | -0.07 | -0.24 |
| YMR029C |       | 11390 | 11036 | 1.03 | 0.05 | -0.07 | -0.24 |
| YKR004C | ECM9  | 2494  | 2416  | 1.03 | 0.05 | -0.07 | -0.24 |
| YOR031W | CRS5  | 2227  | 2158  | 1.03 | 0.05 | -0.07 | -0.24 |
| YJL198W |       | 7661  | 7424  | 1.03 | 0.05 | -0.07 | -0.24 |
| YGR144W | THI4  | 1612  | 1562  | 1.03 | 0.05 | -0.07 | -0.24 |
| YGL159W |       | 4301  | 4168  | 1.03 | 0.05 | -0.07 | -0.24 |
| YLR270W |       | 6144  | 5954  | 1.03 | 0.05 | -0.07 | -0.24 |
| YLR337C | VRP1  | 2431  | 2356  | 1.03 | 0.04 | -0.07 | -0.25 |
| YMR107W |       | 1378  | 1336  | 1.03 | 0.04 | -0.07 | -0.25 |
| YFLO65C |       | 3016  | 2924  | 1.03 | 0.04 | -0.07 | -0.25 |
| YLR377C | FBP1  | 474   | 460   | 1.03 | 0.04 | -0.07 | -0.25 |
| YCL031C | RRP7  | 15854 | 15374 | 1.03 | 0.04 | -0.07 | -0.25 |
| YAR019C | CDC15 | 420   | 407   | 1.03 | 0.04 | -0.07 | -0.25 |
| YPR143W |       | 30034 | 29131 | 1.03 | 0.04 | -0.07 | -0.25 |
| YGL210W | YPT32 | 9263  | 8985  | 1.03 | 0.04 | -0.07 | -0.25 |
| YGR267C | FOL2  | 13557 | 13151 | 1.03 | 0.04 | -0.07 | -0.25 |
| YLL018C | DPS1  | 14105 | 13684 | 1.03 | 0.04 | -0.07 | -0.25 |
| YLR179C |       | 12420 | 12051 | 1.03 | 0.04 | -0.07 | -0.25 |
| YGR164W |       | 4417  | 4286  | 1.03 | 0.04 | -0.07 | -0.25 |
| YGR044C | RME1  | 6015  | 5837  | 1.03 | 0.04 | -0.07 | -0.25 |
| YDR153C |       | 13247 | 12855 | 1.03 | 0.04 | -0.07 | -0.25 |
| YGR235C |       | 10272 | 9969  | 1.03 | 0.04 | -0.07 | -0.25 |
| YLR465C |       | 1314  | 1275  | 1.03 | 0.04 | -0.07 | -0.25 |
| YCL046W |       | 351   | 341   | 1.03 | 0.04 | -0.07 | -0.25 |
| YEL036C | ANP1  | 13861 | 13453 | 1.03 | 0.04 | -0.07 | -0.25 |
| YNL024C |       | 3554  | 3450  | 1.03 | 0.04 | -0.07 | -0.25 |
| YPR083W |       | 8187  | 7947  | 1.03 | 0.04 | -0.07 | -0.25 |
| YDR508C | GNP1  | 9835  | 9546  | 1.03 | 0.04 | -0.07 | -0.25 |
| YOR055W |       | 3357  | 3259  | 1.03 | 0.04 | -0.07 | -0.25 |

|           |         |       |       |      |      |       |       |
|-----------|---------|-------|-------|------|------|-------|-------|
| YJR087W   |         | 9125  | 8858  | 1.03 | 0.04 | -0.07 | -0.25 |
| YML079W   |         | 7005  | 6800  | 1.03 | 0.04 | -0.07 | -0.25 |
| YMR225C   | MRPL44  | 3881  | 3768  | 1.03 | 0.04 | -0.07 | -0.25 |
| YJL015C   |         | 1729  | 1679  | 1.03 | 0.04 | -0.07 | -0.25 |
| YOR240W   |         | 7424  | 7209  | 1.03 | 0.04 | -0.07 | -0.25 |
| YBR122C   | MRPL36  | 9159  | 8895  | 1.03 | 0.04 | -0.07 | -0.26 |
| YBL099W   | ATP1    | 643   | 624   | 1.03 | 0.04 | -0.07 | -0.26 |
| YOR320C   |         | 2331  | 2264  | 1.03 | 0.04 | -0.07 | -0.26 |
| YDR520C   |         | 2878  | 2796  | 1.03 | 0.04 | -0.07 | -0.26 |
| YPR128C   |         | 9021  | 8766  | 1.03 | 0.04 | -0.07 | -0.26 |
| YGL180W   | APG1    | 2968  | 2884  | 1.03 | 0.04 | -0.07 | -0.26 |
| YGR162W   | TIF4631 | 18470 | 17949 | 1.03 | 0.04 | -0.07 | -0.26 |
| YPL213W   | LEA1    | 5830  | 5667  | 1.03 | 0.04 | -0.07 | -0.26 |
| YFR008W   |         | 2216  | 2154  | 1.03 | 0.04 | -0.07 | -0.26 |
| YNL037C   | IDH1    | 14004 | 13615 | 1.03 | 0.04 | -0.07 | -0.26 |
| YOR093C   |         | 2484  | 2415  | 1.03 | 0.04 | -0.07 | -0.26 |
| YKLO92C   | BUD2    | 6101  | 5932  | 1.03 | 0.04 | -0.07 | -0.26 |
| YLR368W   |         | 1773  | 1724  | 1.03 | 0.04 | -0.07 | -0.26 |
| YGR176W   |         | 7494  | 7288  | 1.03 | 0.04 | -0.07 | -0.26 |
| YLL025W   |         | 3106  | 3021  | 1.03 | 0.04 | -0.07 | -0.26 |
| YLR070C   |         | 887   | 863   | 1.03 | 0.04 | -0.07 | -0.26 |
| YGL213C   | SKI8    | 8961  | 8717  | 1.03 | 0.04 | -0.07 | -0.26 |
| YJL065C   |         | 5676  | 5522  | 1.03 | 0.04 | -0.07 | -0.26 |
| YEL030W   | ECM10   | 9014  | 8770  | 1.03 | 0.04 | -0.07 | -0.26 |
| YML041C   |         | 3712  | 3611  | 1.03 | 0.04 | -0.07 | -0.26 |
| YOR118W   |         | 2466  | 2400  | 1.03 | 0.04 | -0.07 | -0.27 |
| YOL014W   |         | 4670  | 4545  | 1.03 | 0.04 | -0.07 | -0.27 |
| YOR203W   |         | 23266 | 22646 | 1.03 | 0.04 | -0.07 | -0.27 |
| YER010C   |         | 2455  | 2390  | 1.03 | 0.04 | -0.07 | -0.27 |
| YEL005C   | VAB31   | 5846  | 5691  | 1.03 | 0.04 | -0.07 | -0.27 |
| YKL006C-A | SFT1    | 5960  | 5803  | 1.03 | 0.04 | -0.07 | -0.27 |
| YDR226W   | ADK1    | 3465  | 3374  | 1.03 | 0.04 | -0.07 | -0.27 |
| YNL325C   | FIG4    | 5479  | 5335  | 1.03 | 0.04 | -0.07 | -0.27 |
| YPR038W   |         | 7515  | 7317  | 1.03 | 0.04 | -0.07 | -0.27 |
| YDR113C   | PDS1    | 5867  | 5714  | 1.03 | 0.04 | -0.07 | -0.27 |
| YDR215C   |         | 454   | 442   | 1.03 | 0.04 | -0.07 | -0.27 |

|           |       |       |       |      |      |       |       |
|-----------|-------|-------|-------|------|------|-------|-------|
| YDR208W   | MSS4  | 1411  | 1374  | 1.03 | 0.04 | -0.07 | -0.27 |
| YOR040W   | GLO4  | 4079  | 3973  | 1.03 | 0.04 | -0.07 | -0.27 |
| YJL148W   | RPA34 | 45277 | 44104 | 1.03 | 0.04 | -0.07 | -0.27 |
| YHR016C   | YSC84 | 2535  | 2469  | 1.03 | 0.04 | -0.07 | -0.27 |
| YKL008C   | LAC1  | 10085 | 9825  | 1.03 | 0.04 | -0.07 | -0.27 |
| YLR266C   |       | 6927  | 6749  | 1.03 | 0.04 | -0.07 | -0.27 |
| YOL030W   |       | 17822 | 17365 | 1.03 | 0.04 | -0.07 | -0.27 |
| YOR349W   | CIN1  | 2045  | 1993  | 1.03 | 0.04 | -0.08 | -0.27 |
| YBL086C   |       | 1271  | 1239  | 1.03 | 0.04 | -0.08 | -0.27 |
| YOR172W   |       | 2871  | 2798  | 1.03 | 0.04 | -0.08 | -0.27 |
| YELO15W   |       | 22097 | 21537 | 1.03 | 0.04 | -0.08 | -0.27 |
| YBR198C   | TAF90 | 2458  | 2396  | 1.03 | 0.04 | -0.08 | -0.27 |
| YCL057W   | PRD1  | 9070  | 8842  | 1.03 | 0.04 | -0.08 | -0.27 |
| YER007C-A |       | 9259  | 9027  | 1.03 | 0.04 | -0.08 | -0.28 |
| YPL164C   |       | 2682  | 2615  | 1.03 | 0.04 | -0.08 | -0.28 |
| YOR356W   |       | 2286  | 2229  | 1.03 | 0.04 | -0.08 | -0.28 |
| YKR053C   | YSR3  | 2700  | 2634  | 1.03 | 0.04 | -0.08 | -0.28 |
| YOL097C   | WRS1  | 22524 | 21974 | 1.03 | 0.04 | -0.08 | -0.28 |
| YKR003W   |       | 3564  | 3477  | 1.02 | 0.04 | -0.08 | -0.28 |
| YGL019W   | CKB1  | 7885  | 7694  | 1.02 | 0.04 | -0.08 | -0.28 |
| YDR143C   | SAN1  | 3873  | 3779  | 1.02 | 0.04 | -0.08 | -0.28 |
| YPL194W   | DDC1  | 4293  | 4189  | 1.02 | 0.04 | -0.08 | -0.28 |
| YDR338C   |       | 2209  | 2156  | 1.02 | 0.04 | -0.08 | -0.28 |
| YLR115W   | CFT2  | 3271  | 3193  | 1.02 | 0.03 | -0.08 | -0.28 |
| YMR299C   |       | 13829 | 13498 | 1.02 | 0.03 | -0.08 | -0.28 |
| YMR081C   | ISF1  | 1222  | 1193  | 1.02 | 0.03 | -0.08 | -0.28 |
| YFR043C   |       | 2403  | 2346  | 1.02 | 0.03 | -0.08 | -0.28 |
| YPL166W   |       | 1532  | 1496  | 1.02 | 0.03 | -0.08 | -0.28 |
| YPL104W   | MSD1  | 6234  | 6087  | 1.02 | 0.03 | -0.08 | -0.28 |
| YOR019W   |       | 861   | 841   | 1.02 | 0.03 | -0.08 | -0.28 |
| YPL069C   | BTS1  | 2689  | 2626  | 1.02 | 0.03 | -0.08 | -0.28 |
| YDR177W   | UBC1  | 20046 | 19580 | 1.02 | 0.03 | -0.08 | -0.29 |
| YELO24W   | RIP1  | 14883 | 14539 | 1.02 | 0.03 | -0.08 | -0.29 |
| YDL226C   | GCS1  | 11043 | 10788 | 1.02 | 0.03 | -0.08 | -0.29 |
| YDR012W   | RPL4B | 15802 | 15437 | 1.02 | 0.03 | -0.08 | -0.29 |
| YNL142W   | MEP2  | 7744  | 7566  | 1.02 | 0.03 | -0.08 | -0.29 |

|         |       |       |       |      |      |       |       |
|---------|-------|-------|-------|------|------|-------|-------|
| YNL210W | MER1  | 1926  | 1882  | 1.02 | 0.03 | -0.08 | -0.29 |
| YLR200W | YKE2  | 7256  | 7090  | 1.02 | 0.03 | -0.08 | -0.29 |
| YML032C | RAD52 | 11671 | 11404 | 1.02 | 0.03 | -0.08 | -0.29 |
| YBRO44C | TCM62 | 2119  | 2071  | 1.02 | 0.03 | -0.08 | -0.29 |
| YPL237W | SUI3  | 27977 | 27345 | 1.02 | 0.03 | -0.08 | -0.29 |
| YMR153W | NUP53 | 8526  | 8335  | 1.02 | 0.03 | -0.08 | -0.29 |
| YFL-TYA |       | 27263 | 26653 | 1.02 | 0.03 | -0.08 | -0.29 |
| YDL201W |       | 33877 | 33121 | 1.02 | 0.03 | -0.08 | -0.29 |
| YJR147W | HMS2  | 4068  | 3978  | 1.02 | 0.03 | -0.08 | -0.29 |
| YJL212C |       | 7526  | 7359  | 1.02 | 0.03 | -0.08 | -0.29 |
| YLR016C |       | 14576 | 14254 | 1.02 | 0.03 | -0.08 | -0.29 |
| YDR385W | EFT2  | 37219 | 36400 | 1.02 | 0.03 | -0.08 | -0.29 |
| YGR010W |       | 5472  | 5352  | 1.02 | 0.03 | -0.08 | -0.29 |
| YDR412W |       | 8865  | 8671  | 1.02 | 0.03 | -0.08 | -0.29 |
| YAL039C | CYC3  | 4242  | 4149  | 1.02 | 0.03 | -0.08 | -0.29 |
| YKL135C | APL2  | 9841  | 9626  | 1.02 | 0.03 | -0.08 | -0.29 |
| YKL197C | PEX1  | 3353  | 3280  | 1.02 | 0.03 | -0.08 | -0.29 |
| YPL186C |       | 3117  | 3049  | 1.02 | 0.03 | -0.08 | -0.29 |
| YDR266C |       | 3210  | 3140  | 1.02 | 0.03 | -0.08 | -0.29 |
| YCL027W | FUS1  | 4206  | 4115  | 1.02 | 0.03 | -0.08 | -0.29 |
| YLR127C | APC2  | 3902  | 3819  | 1.02 | 0.03 | -0.08 | -0.30 |
| YIL109C | SEC24 | 12302 | 12042 | 1.02 | 0.03 | -0.08 | -0.30 |
| YOR370C | MRS6  | 1039  | 1017  | 1.02 | 0.03 | -0.08 | -0.30 |
| YAL013W | DEP1  | 2682  | 2626  | 1.02 | 0.03 | -0.08 | -0.30 |
| YLR239C |       | 4984  | 4880  | 1.02 | 0.03 | -0.08 | -0.30 |
| YKL098W |       | 3794  | 3715  | 1.02 | 0.03 | -0.08 | -0.30 |
| YKRO62W | TFA2  | 2722  | 2666  | 1.02 | 0.03 | -0.08 | -0.30 |
| YPL239W | YAR1  | 28500 | 27918 | 1.02 | 0.03 | -0.08 | -0.30 |
| YMR074C |       | 12122 | 11875 | 1.02 | 0.03 | -0.08 | -0.30 |
| YLR091W |       | 8329  | 8160  | 1.02 | 0.03 | -0.08 | -0.30 |
| YJR149W |       | 1409  | 1381  | 1.02 | 0.03 | -0.08 | -0.30 |
| YBR108W |       | 1904  | 1866  | 1.02 | 0.03 | -0.08 | -0.30 |
| YBR076W | ECM8  | 1671  | 1637  | 1.02 | 0.03 | -0.08 | -0.30 |
| YBR291C | CTP1  | 11185 | 10961 | 1.02 | 0.03 | -0.08 | -0.30 |
| YPRO01W | CIT3  | 2366  | 2319  | 1.02 | 0.03 | -0.08 | -0.30 |
| YAR010C |       | 62869 | 61612 | 1.02 | 0.03 | -0.08 | -0.30 |

|         |       |       |       |      |      |       |       |
|---------|-------|-------|-------|------|------|-------|-------|
| YNL261W | ORC5  | 17560 | 17209 | 1.02 | 0.03 | -0.08 | -0.30 |
| YFR046C |       | 12588 | 12337 | 1.02 | 0.03 | -0.08 | -0.30 |
| YOR123C | LEO1  | 10405 | 10198 | 1.02 | 0.03 | -0.08 | -0.30 |
| YGL199C |       | 7333  | 7189  | 1.02 | 0.03 | -0.08 | -0.30 |
| YPR171W |       | 1208  | 1185  | 1.02 | 0.03 | -0.08 | -0.31 |
| YJR061W |       | 570   | 559   | 1.02 | 0.03 | -0.08 | -0.31 |
| YFL037W | TUB2  | 34128 | 33468 | 1.02 | 0.03 | -0.08 | -0.31 |
| YLR389C | STE23 | 4615  | 4526  | 1.02 | 0.03 | -0.08 | -0.31 |
| YOR012W |       | 798   | 783   | 1.02 | 0.03 | -0.08 | -0.31 |
| YPR195C |       | 674   | 661   | 1.02 | 0.03 | -0.08 | -0.31 |
| YILO36W |       | 11528 | 11307 | 1.02 | 0.03 | -0.08 | -0.31 |
| YML117W |       | 1516  | 1487  | 1.02 | 0.03 | -0.08 | -0.31 |
| YAL063C | FLO9  | 774   | 759   | 1.02 | 0.03 | -0.08 | -0.31 |
| YPL257W |       | 4807  | 4715  | 1.02 | 0.03 | -0.08 | -0.31 |
| YOR196C | LIP5  | 6962  | 6830  | 1.02 | 0.03 | -0.08 | -0.31 |
| YKL190W | CNB1  | 4905  | 4812  | 1.02 | 0.03 | -0.08 | -0.31 |
| YFL006W |       | 2509  | 2461  | 1.02 | 0.03 | -0.08 | -0.31 |
| YER147C |       | 3722  | 3652  | 1.02 | 0.03 | -0.08 | -0.31 |
| YNL189W | SRP1  | 19933 | 19557 | 1.02 | 0.03 | -0.08 | -0.31 |
| YER152C |       | 5519  | 5415  | 1.02 | 0.03 | -0.09 | -0.31 |
| YAL034C | FUN19 | 1806  | 1772  | 1.02 | 0.03 | -0.09 | -0.31 |
| YLR126C |       | 3599  | 3532  | 1.02 | 0.03 | -0.09 | -0.31 |
| YELO01C |       | 3986  | 3912  | 1.02 | 0.03 | -0.09 | -0.31 |
| YER090W | TRP2  | 1368  | 1343  | 1.02 | 0.03 | -0.09 | -0.31 |
| YER165W | PAB1  | 35062 | 34411 | 1.02 | 0.03 | -0.09 | -0.31 |
| YKL225W |       | 764   | 750   | 1.02 | 0.03 | -0.09 | -0.31 |
| YGR174C | CBP4  | 6957  | 6828  | 1.02 | 0.03 | -0.09 | -0.31 |
| YLR460C |       | 10764 | 10565 | 1.02 | 0.03 | -0.09 | -0.31 |
| YER039C | HVG1  | 972   | 954   | 1.02 | 0.03 | -0.09 | -0.31 |
| YKR096W |       | 1456  | 1429  | 1.02 | 0.03 | -0.09 | -0.31 |
| YPL138C |       | 9810  | 9629  | 1.02 | 0.03 | -0.09 | -0.31 |
| YLR338W |       | 935   | 918   | 1.02 | 0.03 | -0.09 | -0.31 |
| YGL250W |       | 2157  | 2118  | 1.02 | 0.03 | -0.09 | -0.31 |
| YDL155W | CLB3  | 7511  | 7375  | 1.02 | 0.03 | -0.09 | -0.31 |
| YJR091C | JSN1  | 1364  | 1340  | 1.02 | 0.03 | -0.09 | -0.31 |
| YDR180W | SCC2  | 5232  | 5139  | 1.02 | 0.03 | -0.09 | -0.31 |

|         |        |       |       |      |      |       |       |
|---------|--------|-------|-------|------|------|-------|-------|
| YOR062C |        | 2879  | 2829  | 1.02 | 0.03 | -0.09 | -0.32 |
| YGL006W | PMC1   | 2142  | 2105  | 1.02 | 0.03 | -0.09 | -0.32 |
| YBL044W |        | 1183  | 1162  | 1.02 | 0.03 | -0.09 | -0.32 |
| YPL077C |        | 1481  | 1455  | 1.02 | 0.03 | -0.09 | -0.32 |
| YLR125W |        | 2189  | 2151  | 1.02 | 0.03 | -0.09 | -0.32 |
| YIL101C | XBP1   | 1058  | 1040  | 1.02 | 0.02 | -0.09 | -0.32 |
| YML128C |        | 2708  | 2662  | 1.02 | 0.02 | -0.09 | -0.32 |
| YBL102W | SFT2   | 1383  | 1360  | 1.02 | 0.02 | -0.09 | -0.32 |
| YOL002C |        | 8681  | 8534  | 1.02 | 0.02 | -0.09 | -0.32 |
| YLR160C | ASP3-4 | 13398 | 13172 | 1.02 | 0.02 | -0.09 | -0.32 |
| YNL080C |        | 11768 | 11569 | 1.02 | 0.02 | -0.09 | -0.32 |
| YGL083W | SCY1   | 4813  | 4733  | 1.02 | 0.02 | -0.09 | -0.32 |
| YPL001W | HAT1   | 5921  | 5822  | 1.02 | 0.02 | -0.09 | -0.32 |
| YDR139C | RUB1   | 5873  | 5776  | 1.02 | 0.02 | -0.09 | -0.32 |
| YMR007W |        | 1773  | 1744  | 1.02 | 0.02 | -0.09 | -0.32 |
| YGR277C |        | 18718 | 18414 | 1.02 | 0.02 | -0.09 | -0.32 |
| YLR102C | APC9   | 2267  | 2230  | 1.02 | 0.02 | -0.09 | -0.32 |
| YBR281C |        | 8407  | 8272  | 1.02 | 0.02 | -0.09 | -0.32 |
| YKR058W | GLG1   | 2269  | 2233  | 1.02 | 0.02 | -0.09 | -0.32 |
| YHL033C | RPL8A  | 40534 | 39888 | 1.02 | 0.02 | -0.09 | -0.32 |
| YBL056W | PTC3   | 14015 | 13792 | 1.02 | 0.02 | -0.09 | -0.32 |
| YDR002W | YRB1   | 29114 | 28651 | 1.02 | 0.02 | -0.09 | -0.32 |
| YKL128C | PMU1   | 7915  | 7790  | 1.02 | 0.02 | -0.09 | -0.33 |
| YPL162C |        | 514   | 506   | 1.02 | 0.02 | -0.09 | -0.33 |
| YIL152W |        | 2957  | 2911  | 1.02 | 0.02 | -0.09 | -0.33 |
| YIL004C | BET1   | 2913  | 2868  | 1.02 | 0.02 | -0.09 | -0.33 |
| YMR085W |        | 13295 | 13091 | 1.02 | 0.02 | -0.09 | -0.33 |
| YDR119W |        | 14477 | 14256 | 1.02 | 0.02 | -0.09 | -0.33 |
| YNL235C |        | 2545  | 2507  | 1.02 | 0.02 | -0.09 | -0.33 |
| YLR077W |        | 12220 | 12036 | 1.02 | 0.02 | -0.09 | -0.33 |
| YGR060W | ERG25  | 3072  | 3026  | 1.02 | 0.02 | -0.09 | -0.33 |
| YGR029W | ERV1   | 10323 | 10173 | 1.01 | 0.02 | -0.09 | -0.33 |
| YGR223C |        | 2909  | 2867  | 1.01 | 0.02 | -0.09 | -0.33 |
| YBR229C | ROT2   | 6884  | 6786  | 1.01 | 0.02 | -0.09 | -0.33 |
| YGR246C | BRF1   | 6134  | 6048  | 1.01 | 0.02 | -0.09 | -0.33 |
| YHR134W |        | 3493  | 3444  | 1.01 | 0.02 | -0.09 | -0.33 |

|           |       |       |       |      |      |       |       |
|-----------|-------|-------|-------|------|------|-------|-------|
| YOL153C   |       | 3475  | 3427  | 1.01 | 0.02 | -0.09 | -0.34 |
| YPL199C   |       | 11556 | 11397 | 1.01 | 0.02 | -0.09 | -0.34 |
| YIL120W   |       | 2465  | 2431  | 1.01 | 0.02 | -0.09 | -0.34 |
| YMR272C   | SCS7  | 3128  | 3085  | 1.01 | 0.02 | -0.09 | -0.34 |
| YOL111C   |       | 8492  | 8376  | 1.01 | 0.02 | -0.09 | -0.34 |
| YKL160W   |       | 14243 | 14049 | 1.01 | 0.02 | -0.09 | -0.34 |
| YBR209W   |       | 1867  | 1842  | 1.01 | 0.02 | -0.09 | -0.34 |
| YNR051C   |       | 5482  | 5410  | 1.01 | 0.02 | -0.09 | -0.34 |
| YBR249C   | ARO4  | 46128 | 45524 | 1.01 | 0.02 | -0.09 | -0.34 |
| YOR227W   |       | 2971  | 2932  | 1.01 | 0.02 | -0.09 | -0.34 |
| YOL083W   |       | 3126  | 3086  | 1.01 | 0.02 | -0.09 | -0.34 |
| YIL084C   | SDS3  | 4715  | 4655  | 1.01 | 0.02 | -0.09 | -0.34 |
| YMR149W   | SWP1  | 10258 | 10128 | 1.01 | 0.02 | -0.09 | -0.34 |
| YDR240C   | SNU56 | 14194 | 14016 | 1.01 | 0.02 | -0.09 | -0.34 |
| YBR162W-A | YSY6  | 15869 | 15670 | 1.01 | 0.02 | -0.09 | -0.34 |
| YOR147W   |       | 11036 | 10898 | 1.01 | 0.02 | -0.09 | -0.34 |
| YNL287W   | SEC21 | 14528 | 14346 | 1.01 | 0.02 | -0.09 | -0.34 |
| YPR198W   | SGE1  | 2265  | 2237  | 1.01 | 0.02 | -0.09 | -0.34 |
| YHL012W   |       | 1054  | 1041  | 1.01 | 0.02 | -0.09 | -0.34 |
| YER101C   | AST2  | 4386  | 4332  | 1.01 | 0.02 | -0.09 | -0.34 |
| YPR057W   | BRR1  | 6596  | 6516  | 1.01 | 0.02 | -0.09 | -0.34 |
| YNL191W   |       | 3506  | 3464  | 1.01 | 0.02 | -0.09 | -0.34 |
| YNL257C   | SIP3  | 4157  | 4107  | 1.01 | 0.02 | -0.09 | -0.34 |
| YMR190C   | SGS1  | 1981  | 1957  | 1.01 | 0.02 | -0.09 | -0.35 |
| YOL126C   | MDH2  | 5852  | 5782  | 1.01 | 0.02 | -0.09 | -0.35 |
| YCRX15W   |       | 1754  | 1733  | 1.01 | 0.02 | -0.10 | -0.35 |
| YNL246W   |       | 2629  | 2598  | 1.01 | 0.02 | -0.10 | -0.35 |
| YDR035W   | ARO3  | 5873  | 5804  | 1.01 | 0.02 | -0.10 | -0.35 |
| YLR191W   | PEX13 | 9899  | 9783  | 1.01 | 0.02 | -0.10 | -0.35 |
| YNL209W   | SSB2  | 52280 | 51672 | 1.01 | 0.02 | -0.10 | -0.35 |
| YDL118W   |       | 4366  | 4316  | 1.01 | 0.02 | -0.10 | -0.35 |
| YPL271W   | ATP15 | 11655 | 11522 | 1.01 | 0.02 | -0.10 | -0.35 |
| YOL164W   |       | 1031  | 1019  | 1.01 | 0.02 | -0.10 | -0.35 |
| YNR062C   |       | 2863  | 2830  | 1.01 | 0.02 | -0.10 | -0.35 |
| YOR068C   |       | 1128  | 1115  | 1.01 | 0.02 | -0.10 | -0.35 |
| YNR008W   | LRO1  | 10123 | 10008 | 1.01 | 0.02 | -0.10 | -0.35 |

|         |        |       |       |      |      |       |       |
|---------|--------|-------|-------|------|------|-------|-------|
| YNL042W | BOP3   | 8398  | 8303  | 1.01 | 0.02 | -0.10 | -0.35 |
| YOL035C |        | 2909  | 2877  | 1.01 | 0.02 | -0.10 | -0.35 |
| YKL077W |        | 8154  | 8065  | 1.01 | 0.02 | -0.10 | -0.35 |
| YDL243C | AAD4   | 411   | 407   | 1.01 | 0.02 | -0.10 | -0.35 |
| YMR196W |        | 384   | 380   | 1.01 | 0.02 | -0.10 | -0.35 |
| YNL284C | MRPL10 | 8476  | 8385  | 1.01 | 0.02 | -0.10 | -0.35 |
| YHL016C | DUR3   | 1645  | 1627  | 1.01 | 0.02 | -0.10 | -0.35 |
| YMR322C |        | 1039  | 1028  | 1.01 | 0.02 | -0.10 | -0.35 |
| YLR322W |        | 2543  | 2516  | 1.01 | 0.02 | -0.10 | -0.35 |
| YOL051W | GAL11  | 6980  | 6907  | 1.01 | 0.02 | -0.10 | -0.35 |
| YDL091C |        | 1286  | 1273  | 1.01 | 0.02 | -0.10 | -0.35 |
| YHR067W |        | 748   | 740   | 1.01 | 0.02 | -0.10 | -0.35 |
| YIL139C | REV7   | 7338  | 7263  | 1.01 | 0.01 | -0.10 | -0.35 |
| YDR098C | GRX3   | 14584 | 14434 | 1.01 | 0.01 | -0.10 | -0.35 |
| YGR056W | RSC1   | 3922  | 3882  | 1.01 | 0.01 | -0.10 | -0.35 |
| YHL006C |        | 1219  | 1207  | 1.01 | 0.01 | -0.10 | -0.36 |
| YJR011C |        | 6023  | 5963  | 1.01 | 0.01 | -0.10 | -0.36 |
| YLR380W | CSR1   | 6150  | 6089  | 1.01 | 0.01 | -0.10 | -0.36 |
| YDR181C | SAS4   | 2812  | 2784  | 1.01 | 0.01 | -0.10 | -0.36 |
| YDL042C | SIR2   | 4946  | 4897  | 1.01 | 0.01 | -0.10 | -0.36 |
| YLL066C |        | 7938  | 7860  | 1.01 | 0.01 | -0.10 | -0.36 |
| YPR074C | TKL1   | 15584 | 15431 | 1.01 | 0.01 | -0.10 | -0.36 |
| YPL216W |        | 6103  | 6043  | 1.01 | 0.01 | -0.10 | -0.36 |
| YMR026C | PEX12  | 4485  | 4442  | 1.01 | 0.01 | -0.10 | -0.36 |
| YHR104W | GRE3   | 6961  | 6894  | 1.01 | 0.01 | -0.10 | -0.36 |
| YNL107W |        | 4548  | 4505  | 1.01 | 0.01 | -0.10 | -0.36 |
| YPR041W | TIF5   | 24673 | 24439 | 1.01 | 0.01 | -0.10 | -0.36 |
| YIL176C |        | 2212  | 2191  | 1.01 | 0.01 | -0.10 | -0.36 |
| YKL223W |        | 5526  | 5474  | 1.01 | 0.01 | -0.10 | -0.36 |
| YKL138C | MRPL31 | 4796  | 4751  | 1.01 | 0.01 | -0.10 | -0.36 |
| YDL028C | MPS1   | 953   | 944   | 1.01 | 0.01 | -0.10 | -0.36 |
| YDL053C |        | 7716  | 7647  | 1.01 | 0.01 | -0.10 | -0.36 |
| YDR334W | SWR1   | 5222  | 5176  | 1.01 | 0.01 | -0.10 | -0.36 |
| YBL030C | PET9   | 66009 | 65428 | 1.01 | 0.01 | -0.10 | -0.36 |
| YJL185C |        | 1386  | 1374  | 1.01 | 0.01 | -0.10 | -0.36 |
| YGR202C | PCT1   | 12677 | 12566 | 1.01 | 0.01 | -0.10 | -0.36 |



|           |       |       |       |      |      |       |       |
|-----------|-------|-------|-------|------|------|-------|-------|
| YGR260W   |       | 3645  | 3613  | 1.01 | 0.01 | -0.10 | -0.36 |
| YLR201C   |       | 12286 | 12180 | 1.01 | 0.01 | -0.10 | -0.36 |
| YGL226W   |       | 4973  | 4931  | 1.01 | 0.01 | -0.10 | -0.36 |
| YPR139C   |       | 4068  | 4034  | 1.01 | 0.01 | -0.10 | -0.36 |
| YLR081W   | GAL2  | 984   | 976   | 1.01 | 0.01 | -0.10 | -0.36 |
| YFL-TYB   |       | 37665 | 37350 | 1.01 | 0.01 | -0.10 | -0.36 |
| YPL127C   | HHO1  | 5517  | 5472  | 1.01 | 0.01 | -0.10 | -0.37 |
| YOR173W   |       | 4988  | 4948  | 1.01 | 0.01 | -0.10 | -0.37 |
| YNR044W   | AGA1  | 6258  | 6208  | 1.01 | 0.01 | -0.10 | -0.37 |
| YNL203C   |       | 660   | 655   | 1.01 | 0.01 | -0.10 | -0.37 |
| YDR326C   |       | 8354  | 8290  | 1.01 | 0.01 | -0.10 | -0.37 |
| YLR314C   | CDC3  | 13594 | 13494 | 1.01 | 0.01 | -0.10 | -0.37 |
| YBR091C   | MRS5  | 9796  | 9727  | 1.01 | 0.01 | -0.10 | -0.37 |
| YIL082W-A |       | 1456  | 1446  | 1.01 | 0.01 | -0.10 | -0.37 |
| YHR089C   | GAR1  | 13133 | 13044 | 1.01 | 0.01 | -0.10 | -0.37 |
| YPR076W   |       | 10101 | 10033 | 1.01 | 0.01 | -0.10 | -0.37 |
| YDL090C   | RAM1  | 9383  | 9321  | 1.01 | 0.01 | -0.10 | -0.37 |
| YIL043C   | CBR1  | 9783  | 9718  | 1.01 | 0.01 | -0.10 | -0.37 |
| YHL037C   |       | 756   | 751   | 1.01 | 0.01 | -0.10 | -0.37 |
| YKL204W   |       | 1911  | 1899  | 1.01 | 0.01 | -0.10 | -0.38 |
| YPL258C   | THI21 | 3036  | 3017  | 1.01 | 0.01 | -0.10 | -0.38 |
| YKR049C   |       | 4379  | 4351  | 1.01 | 0.01 | -0.10 | -0.38 |
| YDR268W   | MSW1  | 4068  | 4043  | 1.01 | 0.01 | -0.10 | -0.38 |
| YDR054C   | CDC34 | 12135 | 12060 | 1.01 | 0.01 | -0.10 | -0.38 |
| YBL066C   | SEF1  | 7163  | 7119  | 1.01 | 0.01 | -0.10 | -0.38 |
| YDR092W   | UBC13 | 10211 | 10148 | 1.01 | 0.01 | -0.10 | -0.38 |
| YKL205W   | LOS1  | 5598  | 5564  | 1.01 | 0.01 | -0.10 | -0.38 |
| YGL175C   | SAE2  | 857   | 852   | 1.01 | 0.01 | -0.10 | -0.38 |
| YDR124W   |       | 2152  | 2139  | 1.01 | 0.01 | -0.10 | -0.38 |
| YGL142C   | GPI10 | 3058  | 3040  | 1.01 | 0.01 | -0.10 | -0.38 |
| YLR269C   |       | 4328  | 4303  | 1.01 | 0.01 | -0.10 | -0.38 |
| YCL048W   |       | 422   | 420   | 1.01 | 0.01 | -0.10 | -0.38 |
| YJR007W   | SUI2  | 9311  | 9259  | 1.01 | 0.01 | -0.10 | -0.38 |
| YLR459W   | CDC91 | 7074  | 7035  | 1.01 | 0.01 | -0.10 | -0.38 |
| YCRX17W   |       | 2130  | 2118  | 1.01 | 0.01 | -0.10 | -0.38 |
| YBR114W   | RAD16 | 1129  | 1123  | 1.01 | 0.01 | -0.10 | -0.38 |

|         |       |       |       |      |      |       |       |
|---------|-------|-------|-------|------|------|-------|-------|
| YOL147C | PEX11 | 8421  | 8375  | 1.01 | 0.01 | -0.10 | -0.38 |
| YEL044W |       | 8986  | 8938  | 1.01 | 0.01 | -0.10 | -0.38 |
| YCR036W | RBK1  | 6554  | 6519  | 1.01 | 0.01 | -0.10 | -0.38 |
| YDR332W |       | 2021  | 2010  | 1.01 | 0.01 | -0.10 | -0.38 |
| YOR222W |       | 22861 | 22745 | 1.01 | 0.01 | -0.11 | -0.38 |
| YLR011W |       | 3750  | 3731  | 1.01 | 0.01 | -0.11 | -0.38 |
| YPR121W | THI22 | 2474  | 2462  | 1.01 | 0.01 | -0.11 | -0.38 |
| YLR055C | SPT8  | 4720  | 4697  | 1.00 | 0.01 | -0.11 | -0.38 |
| YJL110C | GZF3  | 19971 | 19873 | 1.00 | 0.01 | -0.11 | -0.38 |
| YIL082W |       | 2800  | 2786  | 1.00 | 0.01 | -0.11 | -0.38 |
| YOL047C |       | 607   | 604   | 1.00 | 0.01 | -0.11 | -0.38 |
| YPL055C |       | 2375  | 2363  | 1.00 | 0.01 | -0.11 | -0.38 |
| YIL106W | MOB1  | 5803  | 5776  | 1.00 | 0.01 | -0.11 | -0.38 |
| YKL210W | UBA1  | 1102  | 1097  | 1.00 | 0.01 | -0.11 | -0.39 |
| YLR293C | GSP1  | 34828 | 34676 | 1.00 | 0.01 | -0.11 | -0.39 |
| YOL156W | HXT11 | 1215  | 1210  | 1.00 | 0.01 | -0.11 | -0.39 |
| YLR154C |       | 5709  | 5684  | 1.00 | 0.01 | -0.11 | -0.39 |
| YPR177C |       | 7013  | 6984  | 1.00 | 0.01 | -0.11 | -0.39 |
| YDR260C | SWM1  | 13799 | 13744 | 1.00 | 0.01 | -0.11 | -0.39 |
| YGL025C | PGD1  | 14230 | 14175 | 1.00 | 0.01 | -0.11 | -0.39 |
| YGR220C | MRPL9 | 7866  | 7836  | 1.00 | 0.01 | -0.11 | -0.39 |
| YPR051W | MAK3  | 7173  | 7146  | 1.00 | 0.01 | -0.11 | -0.39 |
| YNL138W | SRV2  | 11662 | 11619 | 1.00 | 0.01 | -0.11 | -0.39 |
| YNL048W | ALG11 | 4965  | 4947  | 1.00 | 0.01 | -0.11 | -0.39 |
| YGR288W | MAL13 | 1959  | 1952  | 1.00 | 0.01 | -0.11 | -0.39 |
| YKL082C |       | 6730  | 6708  | 1.00 | 0.00 | -0.11 | -0.39 |
| YNL050C |       | 6016  | 5997  | 1.00 | 0.00 | -0.11 | -0.39 |
| YBL076C | ILS1  | 24540 | 24465 | 1.00 | 0.00 | -0.11 | -0.39 |
| YOL157C |       | 494   | 492   | 1.00 | 0.00 | -0.11 | -0.39 |
| YJR014W |       | 6964  | 6943  | 1.00 | 0.00 | -0.11 | -0.39 |
| YEL018W |       | 13371 | 13332 | 1.00 | 0.00 | -0.11 | -0.39 |
| YBR185C | MBA1  | 7368  | 7347  | 1.00 | 0.00 | -0.11 | -0.39 |
| YCR024C |       | 4878  | 4864  | 1.00 | 0.00 | -0.11 | -0.39 |
| YOR321W | PMT3  | 2976  | 2968  | 1.00 | 0.00 | -0.11 | -0.39 |
| YKL187C |       | 1716  | 1711  | 1.00 | 0.00 | -0.11 | -0.39 |
| YOL142W | RRP40 | 13330 | 13294 | 1.00 | 0.00 | -0.11 | -0.39 |

|         |        |       |       |      |      |       |       |
|---------|--------|-------|-------|------|------|-------|-------|
| YBR165W | UBS1   | 9121  | 9097  | 1.00 | 0.00 | -0.11 | -0.39 |
| YER183C |        | 5925  | 5910  | 1.00 | 0.00 | -0.11 | -0.40 |
| YDR165W |        | 4053  | 4044  | 1.00 | 0.00 | -0.11 | -0.40 |
| YBR024W | SCO2   | 804   | 802   | 1.00 | 0.00 | -0.11 | -0.40 |
| YPL265W | DIP5   | 22190 | 22141 | 1.00 | 0.00 | -0.11 | -0.40 |
| YBR183W | YPC1   | 12160 | 12134 | 1.00 | 0.00 | -0.11 | -0.40 |
| YDR225W | HTA1   | 28666 | 28605 | 1.00 | 0.00 | -0.11 | -0.40 |
| YPR066W | UBA3   | 1989  | 1985  | 1.00 | 0.00 | -0.11 | -0.40 |
| YJR009C | TDH2   | 50608 | 50511 | 1.00 | 0.00 | -0.11 | -0.40 |
| YMR043W | MCM1   | 2828  | 2823  | 1.00 | 0.00 | -0.11 | -0.40 |
| YHR050W | SMF2   | 16796 | 16765 | 1.00 | 0.00 | -0.11 | -0.40 |
| YPR100W |        | 18498 | 18464 | 1.00 | 0.00 | -0.11 | -0.40 |
| YBR110W | ALG1   | 6880  | 6868  | 1.00 | 0.00 | -0.11 | -0.40 |
| YGL196W |        | 6980  | 6968  | 1.00 | 0.00 | -0.11 | -0.40 |
| YJR031C | GEA1   | 1707  | 1705  | 1.00 | 0.00 | -0.11 | -0.40 |
| YER043C | SAH1   | 14284 | 14265 | 1.00 | 0.00 | -0.11 | -0.40 |
| YLR345W |        | 1310  | 1308  | 1.00 | 0.00 | -0.11 | -0.40 |
| YJR021C | REC107 | 7550  | 7541  | 1.00 | 0.00 | -0.11 | -0.40 |
| YPL089C | RLM1   | 2967  | 2963  | 1.00 | 0.00 | -0.11 | -0.40 |
| YKR074W |        | 9578  | 9569  | 1.00 | 0.00 | -0.11 | -0.40 |
| YAL015C | NTG1   | 2066  | 2064  | 1.00 | 0.00 | -0.11 | -0.40 |
| YOR047C | STD1   | 16440 | 16429 | 1.00 | 0.00 | -0.11 | -0.41 |
| YLR265C |        | 6971  | 6966  | 1.00 | 0.00 | -0.11 | -0.41 |
| YLR150W | STM1   | 33936 | 33919 | 1.00 | 0.00 | -0.11 | -0.41 |
| YLR331C |        | 5091  | 5089  | 1.00 | 0.00 | -0.11 | -0.41 |
| YOR105W |        | 5739  | 5737  | 1.00 | 0.00 | -0.11 | -0.41 |
| YEL013W | VAC8   | 23915 | 23911 | 1.00 | 0.00 | -0.11 | -0.41 |
| YDR456W | NHX1   | 3193  | 3193  | 1.00 | 0.00 | -0.11 | -0.41 |
| YKL179C |        | 2552  | 2552  | 1.00 | 0.00 | -0.11 | -0.41 |
| YDL197C | ASF2   | 8316  | 8316  | 1.00 | 0.00 | -0.11 | -0.41 |
| YMR052W | FAR3   | 1795  | 1795  | 1.00 | 0.00 | -0.11 | -0.41 |
| YML068W |        | 2562  | 2562  | 1.00 | 0.00 | -0.11 | -0.41 |
| YDR090C |        | 7347  | 7347  | 1.00 | 0.00 | -0.11 | -0.41 |
| YGL119W | ABC1   | 14119 | 14122 | 1.00 | 0.00 | -0.11 | -0.41 |
| YPR134W | MSS18  | 1589  | 1589  | 1.00 | 0.00 | -0.11 | -0.41 |
| YDR540C |        | 2953  | 2954  | 1.00 | 0.00 | -0.11 | -0.41 |

|         |        |       |       |      |      |       |       |
|---------|--------|-------|-------|------|------|-------|-------|
| YFL009W | CDC4   | 3470  | 3471  | 1.00 | 0.00 | -0.11 | -0.41 |
| YKR020W |        | 4297  | 4299  | 1.00 | 0.00 | -0.11 | -0.41 |
| YOR255W |        | 1940  | 1941  | 1.00 | 0.00 | -0.11 | -0.41 |
| YGL063W | PUS2   | 1620  | 1621  | 1.00 | 0.00 | -0.11 | -0.41 |
| YGL069C |        | 25614 | 25631 | 1.00 | 0.00 | -0.11 | -0.41 |
| YOL001W | PHO80  | 7560  | 7565  | 1.00 | 0.00 | -0.11 | -0.41 |
| YAR066W |        | 2298  | 2300  | 1.00 | 0.00 | -0.11 | -0.41 |
| YPR099C |        | 11374 | 11385 | 1.00 | 0.00 | -0.11 | -0.41 |
| YDR298C | ATP5   | 15751 | 15768 | 1.00 | 0.00 | -0.11 | -0.41 |
| YPL219W | PCL8   | 4115  | 4120  | 1.00 | 0.00 | -0.11 | -0.42 |
| YIL168W | SDL1   | 1594  | 1596  | 1.00 | 0.00 | -0.11 | -0.42 |
| YNL150W |        | 13826 | 13845 | 1.00 | 0.00 | -0.11 | -0.42 |
| YHR100C |        | 3583  | 3588  | 1.00 | 0.00 | -0.11 | -0.42 |
| YGL223C |        | 6841  | 6851  | 1.00 | 0.00 | -0.11 | -0.42 |
| YPL091W | GLR1   | 8180  | 8193  | 1.00 | 0.00 | -0.11 | -0.42 |
| YJR020W |        | 1118  | 1120  | 1.00 | 0.00 | -0.11 | -0.42 |
| YOR204W | DED1   | 17820 | 17848 | 1.00 | 0.00 | -0.11 | -0.42 |
| YLR452C | SST2   | 12074 | 12094 | 1.00 | 0.00 | -0.11 | -0.42 |
| YDR388W | RVS167 | 7854  | 7867  | 1.00 | 0.00 | -0.11 | -0.42 |
| YCL016C |        | 15163 | 15189 | 1.00 | 0.00 | -0.11 | -0.42 |
| YGL070C | RPB9   | 10238 | 10256 | 1.00 | 0.00 | -0.11 | -0.42 |
| YHR190W | ERG9   | 540   | 541   | 1.00 | 0.00 | -0.12 | -0.42 |
| YDL088C | ASM4   | 7125  | 7140  | 1.00 | 0.00 | -0.12 | -0.42 |
| YKL189W | HYM1   | 2476  | 2481  | 1.00 | 0.00 | -0.12 | -0.42 |
| YOR210W | RPB10  | 11174 | 11199 | 1.00 | 0.00 | -0.12 | -0.42 |
| YHR176W |        | 606   | 607   | 1.00 | 0.00 | -0.12 | -0.42 |
| YKL035W | UGP1   | 7925  | 7944  | 1.00 | 0.00 | -0.12 | -0.42 |
| YOR190W | SPR1   | 1229  | 1232  | 1.00 | 0.00 | -0.12 | -0.42 |
| YMR281W | GPI12  | 6448  | 6465  | 1.00 | 0.00 | -0.12 | -0.42 |
| YPR138C | MEP3   | 6943  | 6962  | 1.00 | 0.00 | -0.12 | -0.42 |
| YEL050C | RML2   | 17624 | 17672 | 1.00 | 0.00 | -0.12 | -0.42 |
| YDR196C |        | 9792  | 9819  | 1.00 | 0.00 | -0.12 | -0.42 |
| YFL068W |        | 14001 | 14041 | 1.00 | 0.00 | -0.12 | -0.42 |
| YOR249C | APC5   | 1113  | 1116  | 1.00 | 0.00 | -0.12 | -0.42 |
| YER150W | SPI1   | 1874  | 1880  | 1.00 | 0.00 | -0.12 | -0.42 |
| YAL036C | FUN11  | 31292 | 31389 | 1.00 | 0.00 | -0.12 | -0.42 |

|         |       |       |       |      |       |       |       |
|---------|-------|-------|-------|------|-------|-------|-------|
| YDR344C |       | 1848  | 1854  | 1.00 | 0.00  | -0.12 | -0.42 |
| YNL337W |       | 1366  | 1370  | 1.00 | 0.00  | -0.12 | -0.43 |
| YBR028C |       | 1701  | 1706  | 1.00 | 0.00  | -0.12 | -0.43 |
| YJL160C |       | 1100  | 1104  | 1.00 | 0.00  | -0.12 | -0.43 |
| YGL220W |       | 15785 | 15836 | 1.00 | 0.00  | -0.12 | -0.43 |
| YML048W | GSF2  | 7928  | 7954  | 1.00 | 0.00  | -0.12 | -0.43 |
| YLR456W |       | 7475  | 7500  | 1.00 | 0.00  | -0.12 | -0.43 |
| YLR019W |       | 7539  | 7565  | 1.00 | 0.00  | -0.12 | -0.43 |
| YGL100W | SEH1  | 3800  | 3814  | 1.00 | -0.01 | -0.12 | -0.43 |
| YKL047W |       | 7214  | 7240  | 1.00 | -0.01 | -0.12 | -0.43 |
| YML105C | SEC65 | 6824  | 6849  | 1.00 | -0.01 | -0.12 | -0.43 |
| YMR285C |       | 15070 | 15128 | 1.00 | -0.01 | -0.12 | -0.43 |
| YJL059W | YHC3  | 2735  | 2746  | 1.00 | -0.01 | -0.12 | -0.43 |
| YPR125W |       | 11304 | 11348 | 1.00 | -0.01 | -0.12 | -0.43 |
| YOR313C | SPS4  | 5003  | 5023  | 1.00 | -0.01 | -0.12 | -0.43 |
| YGL145W | TIP20 | 4057  | 4074  | 1.00 | -0.01 | -0.12 | -0.43 |
| YGR166W | KRE11 | 4424  | 4442  | 1.00 | -0.01 | -0.12 | -0.43 |
| YOR065W | CYT1  | 6250  | 6276  | 1.00 | -0.01 | -0.12 | -0.43 |
| YDR502C | SAM2  | 8681  | 8717  | 1.00 | -0.01 | -0.12 | -0.43 |
| YNR006W | VPS27 | 9854  | 9895  | 1.00 | -0.01 | -0.12 | -0.43 |
| YFR006W |       | 12020 | 12072 | 1.00 | -0.01 | -0.12 | -0.43 |
| YJL053W | PEP8  | 10809 | 10856 | 1.00 | -0.01 | -0.12 | -0.43 |
| YFL042C |       | 2205  | 2215  | 1.00 | -0.01 | -0.12 | -0.43 |
| YMR037C | MSN2  | 1694  | 1702  | 1.00 | -0.01 | -0.12 | -0.43 |
| YJL122W |       | 34277 | 34448 | 1.00 | -0.01 | -0.12 | -0.43 |
| YGL026C | TRP5  | 8895  | 8940  | 1.00 | -0.01 | -0.12 | -0.43 |
| YJL208C | NUC1  | 8692  | 8737  | 0.99 | -0.01 | -0.12 | -0.44 |
| YLR005W | SSL1  | 9379  | 9429  | 0.99 | -0.01 | -0.12 | -0.44 |
| YLR463C |       | 3290  | 3308  | 0.99 | -0.01 | -0.12 | -0.44 |
| YDR270W | CCC2  | 2450  | 2463  | 0.99 | -0.01 | -0.12 | -0.44 |
| YCR104W | PAU3  | 2135  | 2147  | 0.99 | -0.01 | -0.12 | -0.44 |
| YCR071C | IMG2  | 14090 | 14169 | 0.99 | -0.01 | -0.12 | -0.44 |
| YHR081W |       | 13624 | 13702 | 0.99 | -0.01 | -0.12 | -0.44 |
| YBR067C | TIP1  | 15985 | 16077 | 0.99 | -0.01 | -0.12 | -0.44 |
| YJL139C | YUR1  | 1978  | 1990  | 0.99 | -0.01 | -0.12 | -0.44 |
| YBR077C |       | 15643 | 15738 | 0.99 | -0.01 | -0.12 | -0.44 |

|         |       |       |       |      |       |       |       |
|---------|-------|-------|-------|------|-------|-------|-------|
| YLR433C | CNA1  | 2720  | 2737  | 0.99 | -0.01 | -0.12 | -0.44 |
| YIL023C |       | 6895  | 6938  | 0.99 | -0.01 | -0.12 | -0.44 |
| YER184C |       | 2827  | 2845  | 0.99 | -0.01 | -0.12 | -0.44 |
| YLL016W | SDC25 | 3368  | 3390  | 0.99 | -0.01 | -0.12 | -0.44 |
| YPL002C | SNF8  | 5237  | 5271  | 0.99 | -0.01 | -0.12 | -0.44 |
| YDR537C |       | 5794  | 5831  | 0.99 | -0.01 | -0.12 | -0.44 |
| YGR137W |       | 4727  | 4758  | 0.99 | -0.01 | -0.12 | -0.44 |
| YMR077C |       | 5869  | 5907  | 0.99 | -0.01 | -0.12 | -0.44 |
| YLL052C | AQY2  | 7266  | 7315  | 0.99 | -0.01 | -0.12 | -0.44 |
| YBR235W |       | 3614  | 3639  | 0.99 | -0.01 | -0.12 | -0.44 |
| YOR003W | YSP3  | 1388  | 1397  | 0.99 | -0.01 | -0.12 | -0.44 |
| YJL206C |       | 1717  | 1729  | 0.99 | -0.01 | -0.12 | -0.45 |
| YDR156W | RPA14 | 4961  | 4996  | 0.99 | -0.01 | -0.12 | -0.45 |
| YLR036C |       | 8152  | 8211  | 0.99 | -0.01 | -0.12 | -0.45 |
| YJR137C | ECM17 | 1835  | 1848  | 0.99 | -0.01 | -0.12 | -0.45 |
| YPL208W |       | 11979 | 12068 | 0.99 | -0.01 | -0.12 | -0.45 |
| YLR438W | CAR2  | 3981  | 4011  | 0.99 | -0.01 | -0.12 | -0.45 |
| YPL044C |       | 11459 | 11546 | 0.99 | -0.01 | -0.12 | -0.45 |
| YLR444C |       | 6014  | 6060  | 0.99 | -0.01 | -0.12 | -0.45 |
| YML042W | CAT2  | 3289  | 3315  | 0.99 | -0.01 | -0.12 | -0.45 |
| YLR069C | MEF1  | 11347 | 11436 | 0.99 | -0.01 | -0.12 | -0.45 |
| YDR282C |       | 2040  | 2056  | 0.99 | -0.01 | -0.12 | -0.45 |
| YLR315W |       | 2567  | 2588  | 0.99 | -0.01 | -0.12 | -0.45 |
| YNL115C |       | 4208  | 4242  | 0.99 | -0.01 | -0.12 | -0.45 |
| YGL003C | CDH1  | 3485  | 3513  | 0.99 | -0.01 | -0.12 | -0.45 |
| YGR002C |       | 5517  | 5563  | 0.99 | -0.01 | -0.12 | -0.45 |
| YPR080W | TEF1  | 49461 | 49871 | 0.99 | -0.01 | -0.12 | -0.45 |
| YCR007C |       | 1162  | 1172  | 0.99 | -0.01 | -0.12 | -0.45 |
| YGR216C | GPI1  | 8354  | 8426  | 0.99 | -0.01 | -0.12 | -0.45 |
| YLR001C |       | 4030  | 4065  | 0.99 | -0.01 | -0.12 | -0.45 |
| YCRX07W |       | 3573  | 3605  | 0.99 | -0.01 | -0.13 | -0.45 |
| YDR458C |       | 2279  | 2299  | 0.99 | -0.01 | -0.13 | -0.45 |
| YMR320W |       | 826   | 833   | 0.99 | -0.01 | -0.13 | -0.45 |
| YGL187C | COX4  | 15531 | 15671 | 0.99 | -0.01 | -0.13 | -0.46 |
| YDR056C |       | 17508 | 17666 | 0.99 | -0.01 | -0.13 | -0.46 |
| YHL044W |       | 890   | 898   | 0.99 | -0.01 | -0.13 | -0.46 |

|           |       |       |       |      |       |       |       |
|-----------|-------|-------|-------|------|-------|-------|-------|
| YHR042W   | NCP1  | 13176 | 13295 | 0.99 | -0.01 | -0.13 | -0.46 |
| YKL126W   | YPK1  | 1945  | 1963  | 0.99 | -0.01 | -0.13 | -0.46 |
| YLR046C   |       | 2282  | 2303  | 0.99 | -0.01 | -0.13 | -0.46 |
| YPL180W   |       | 6785  | 6849  | 0.99 | -0.01 | -0.13 | -0.46 |
| YGL085W   |       | 8748  | 8831  | 0.99 | -0.01 | -0.13 | -0.46 |
| YPL190C   | NAB3  | 11106 | 11212 | 0.99 | -0.01 | -0.13 | -0.46 |
| YML058W   | SML1  | 12856 | 12979 | 0.99 | -0.01 | -0.13 | -0.46 |
| YMR038C   | LYS7  | 23059 | 23282 | 0.99 | -0.01 | -0.13 | -0.46 |
| YIR019C   | MUC1  | 708   | 715   | 0.99 | -0.01 | -0.13 | -0.46 |
| YJL196C   | ELO1  | 5795  | 5852  | 0.99 | -0.01 | -0.13 | -0.46 |
| YAR008W   | SEN34 | 17299 | 17475 | 0.99 | -0.01 | -0.13 | -0.46 |
| YOL088C   | MPD2  | 20079 | 20287 | 0.99 | -0.01 | -0.13 | -0.46 |
| YOR384W   | FRE5  | 846   | 855   | 0.99 | -0.01 | -0.13 | -0.46 |
| YJL036W   | SNX4  | 9429  | 9527  | 0.99 | -0.01 | -0.13 | -0.46 |
| YLR261C   |       | 6969  | 7042  | 0.99 | -0.01 | -0.13 | -0.46 |
| YDL209C   |       | 11400 | 11519 | 0.99 | -0.02 | -0.13 | -0.46 |
| YLR215C   |       | 8451  | 8540  | 0.99 | -0.02 | -0.13 | -0.46 |
| YDR353W   | TRR1  | 24874 | 25140 | 0.99 | -0.02 | -0.13 | -0.46 |
| YPR188C   |       | 8119  | 8207  | 0.99 | -0.02 | -0.13 | -0.47 |
| YKL127W   | PGM1  | 10258 | 10370 | 0.99 | -0.02 | -0.13 | -0.47 |
| YEL076C   |       | 1170  | 1183  | 0.99 | -0.02 | -0.13 | -0.47 |
| YPL041C   |       | 1599  | 1617  | 0.99 | -0.02 | -0.13 | -0.47 |
| YBL064C   |       | 14245 | 14401 | 0.99 | -0.02 | -0.13 | -0.47 |
| YKL140W   | TGL1  | 3746  | 3787  | 0.99 | -0.02 | -0.13 | -0.47 |
| YFL029C   | CAK1  | 2217  | 2242  | 0.99 | -0.02 | -0.13 | -0.47 |
| YEL076W-C |       | 2113  | 2137  | 0.99 | -0.02 | -0.13 | -0.47 |
| YPL108W   |       | 12655 | 12796 | 0.99 | -0.02 | -0.13 | -0.47 |
| YLR042C   |       | 2185  | 2209  | 0.99 | -0.02 | -0.13 | -0.47 |
| YPR114W   |       | 10852 | 10974 | 0.99 | -0.02 | -0.13 | -0.47 |
| YIL138C   | TPM2  | 15161 | 15332 | 0.99 | -0.02 | -0.13 | -0.47 |
| YHR112C   |       | 2454  | 2482  | 0.99 | -0.02 | -0.13 | -0.47 |
| YNL168C   |       | 20381 | 20616 | 0.99 | -0.02 | -0.13 | -0.47 |
| YKR086W   | PRP16 | 1606  | 1625  | 0.99 | -0.02 | -0.13 | -0.47 |
| YOL105C   | WSC3  | 3290  | 3329  | 0.99 | -0.02 | -0.13 | -0.47 |
| YER048C   | CAJ1  | 2763  | 2796  | 0.99 | -0.02 | -0.13 | -0.47 |
| YGL125W   | MET13 | 3755  | 3801  | 0.99 | -0.02 | -0.13 | -0.47 |

|         |        |       |       |      |       |       |       |
|---------|--------|-------|-------|------|-------|-------|-------|
| YBR280C |        | 1293  | 1309  | 0.99 | -0.02 | -0.13 | -0.47 |
| YOR194C | TOA1   | 11344 | 11483 | 0.99 | -0.02 | -0.13 | -0.47 |
| YBR272C | HSM3   | 2319  | 2347  | 0.99 | -0.02 | -0.13 | -0.47 |
| YFR036W | CDC26  | 4239  | 4292  | 0.99 | -0.02 | -0.13 | -0.47 |
| YILO46W | MET30  | 7482  | 7576  | 0.99 | -0.02 | -0.13 | -0.47 |
| YPL252C | YAH1   | 7196  | 7287  | 0.99 | -0.02 | -0.13 | -0.47 |
| YDR336W |        | 740   | 749   | 0.99 | -0.02 | -0.13 | -0.48 |
| YBR222C | FAT2   | 2883  | 2920  | 0.99 | -0.02 | -0.13 | -0.48 |
| YCRX13W |        | 2879  | 2916  | 0.99 | -0.02 | -0.13 | -0.48 |
| YBL107C |        | 17753 | 17983 | 0.99 | -0.02 | -0.13 | -0.48 |
| YILO80W |        | 2647  | 2681  | 0.99 | -0.02 | -0.13 | -0.48 |
| YJL146W | IDS2   | 6987  | 7078  | 0.99 | -0.02 | -0.13 | -0.48 |
| YDR145W | TAF61  | 10510 | 10647 | 0.99 | -0.02 | -0.13 | -0.48 |
| YER011W | TIR1   | 494   | 500   | 0.99 | -0.02 | -0.13 | -0.48 |
| YDR498C | SEC20  | 2236  | 2266  | 0.99 | -0.02 | -0.13 | -0.48 |
| YFL034W |        | 1981  | 2007  | 0.99 | -0.02 | -0.13 | -0.48 |
| YELO51W | VMA8   | 13490 | 13672 | 0.99 | -0.02 | -0.13 | -0.48 |
| YBL057C |        | 8957  | 9079  | 0.99 | -0.02 | -0.13 | -0.48 |
| YKL028W | TFA1   | 9245  | 9372  | 0.99 | -0.02 | -0.13 | -0.48 |
| YJL023C | PET130 | 4570  | 4633  | 0.99 | -0.02 | -0.13 | -0.48 |
| YDR296W | MHR1   | 19999 | 20277 | 0.99 | -0.02 | -0.13 | -0.48 |
| YMR238W | DFG5   | 5178  | 5251  | 0.99 | -0.02 | -0.13 | -0.48 |
| YGR224W |        | 4109  | 4167  | 0.99 | -0.02 | -0.13 | -0.48 |
| YPL210C | SRP72  | 23639 | 23977 | 0.99 | -0.02 | -0.13 | -0.48 |
| YCR082W |        | 15952 | 16182 | 0.99 | -0.02 | -0.13 | -0.48 |
| YILO56W |        | 9289  | 9423  | 0.99 | -0.02 | -0.13 | -0.48 |
| YNL213C |        | 6075  | 6163  | 0.99 | -0.02 | -0.13 | -0.48 |
| YML121W | GTR1   | 5219  | 5295  | 0.99 | -0.02 | -0.13 | -0.48 |
| YER166W |        | 375   | 380   | 0.99 | -0.02 | -0.13 | -0.48 |
| YNR056C | BIO5   | 5330  | 5408  | 0.99 | -0.02 | -0.13 | -0.48 |
| YOR077W | RTS2   | 5163  | 5239  | 0.99 | -0.02 | -0.13 | -0.48 |
| YLR027C | AAT2   | 23165 | 23507 | 0.99 | -0.02 | -0.13 | -0.49 |
| YFL044C |        | 2696  | 2736  | 0.99 | -0.02 | -0.13 | -0.49 |
| YHR041C | SRB2   | 4509  | 4576  | 0.99 | -0.02 | -0.13 | -0.49 |
| YILO88C |        | 7818  | 7937  | 0.99 | -0.02 | -0.13 | -0.49 |
| YGR019W | UGA1   | 8384  | 8512  | 0.98 | -0.02 | -0.13 | -0.49 |



|         |       |       |       |      |       |       |       |
|---------|-------|-------|-------|------|-------|-------|-------|
| YAL023C | PMT2  | 5695  | 5782  | 0.98 | -0.02 | -0.13 | -0.49 |
| YGR259C |       | 3757  | 3814  | 0.98 | -0.02 | -0.13 | -0.49 |
| YJL120W |       | 7474  | 7588  | 0.98 | -0.02 | -0.13 | -0.49 |
| YOR164C |       | 525   | 533   | 0.98 | -0.02 | -0.13 | -0.49 |
| YNL040W |       | 14010 | 14225 | 0.98 | -0.02 | -0.13 | -0.49 |
| YIL102C |       | 1828  | 1856  | 0.98 | -0.02 | -0.13 | -0.49 |
| YDR358W |       | 2901  | 2946  | 0.98 | -0.02 | -0.13 | -0.49 |
| YBR227C | MCX1  | 3002  | 3049  | 0.98 | -0.02 | -0.13 | -0.49 |
| YGR009C | SEC9  | 3604  | 3660  | 0.98 | -0.02 | -0.13 | -0.49 |
| YCRO08W | SAT4  | 503   | 511   | 0.98 | -0.02 | -0.13 | -0.49 |
| YJL199C |       | 707   | 718   | 0.98 | -0.02 | -0.14 | -0.49 |
| YKL175W |       | 9073  | 9219  | 0.98 | -0.02 | -0.14 | -0.49 |
| YMR264W | CUE1  | 6986  | 7098  | 0.98 | -0.02 | -0.14 | -0.49 |
| YLR219W |       | 4368  | 4438  | 0.98 | -0.02 | -0.14 | -0.49 |
| YIL142W | CCT2  | 13954 | 14179 | 0.98 | -0.02 | -0.14 | -0.49 |
| YBR264C | YPT10 | 3930  | 3994  | 0.98 | -0.02 | -0.14 | -0.49 |
| YDL219W |       | 3888  | 3952  | 0.98 | -0.02 | -0.14 | -0.49 |
| YMR010W |       | 10786 | 10964 | 0.98 | -0.02 | -0.14 | -0.49 |
| YDR038C | ENA5  | 2898  | 2946  | 0.98 | -0.02 | -0.14 | -0.49 |
| YDL131W | LYS21 | 14876 | 15122 | 0.98 | -0.02 | -0.14 | -0.49 |
| YER146W | LSM5  | 13273 | 13492 | 0.98 | -0.02 | -0.14 | -0.49 |
| YJL021C |       | 2904  | 2952  | 0.98 | -0.02 | -0.14 | -0.50 |
| YKLO41W | VPS24 | 5992  | 6092  | 0.98 | -0.02 | -0.14 | -0.50 |
| YOR237W | HES1  | 491   | 499   | 0.98 | -0.02 | -0.14 | -0.50 |
| YGR052W |       | 852   | 866   | 0.98 | -0.02 | -0.14 | -0.50 |
| YBR074W |       | 2384  | 2425  | 0.98 | -0.02 | -0.14 | -0.50 |
| YKL108W | SLD2  | 2111  | 2147  | 0.98 | -0.02 | -0.14 | -0.50 |
| YKR026C | GCN3  | 15940 | 16214 | 0.98 | -0.02 | -0.14 | -0.50 |
| YBR102C | EXO84 | 2859  | 2908  | 0.98 | -0.02 | -0.14 | -0.50 |
| YGL168W |       | 5296  | 5388  | 0.98 | -0.02 | -0.14 | -0.50 |
| YFL058W | THI5  | 1584  | 1612  | 0.98 | -0.02 | -0.14 | -0.50 |
| YGL096W |       | 839   | 854   | 0.98 | -0.02 | -0.14 | -0.50 |
| YDR425W |       | 2514  | 2558  | 0.98 | -0.03 | -0.14 | -0.50 |
| YJL044C | GYP6  | 4621  | 4702  | 0.98 | -0.03 | -0.14 | -0.50 |
| YLR343W |       | 667   | 679   | 0.98 | -0.03 | -0.14 | -0.50 |
| YHR137W | ARO9  | 2301  | 2342  | 0.98 | -0.03 | -0.14 | -0.50 |

|           |       |       |       |      |       |       |       |
|-----------|-------|-------|-------|------|-------|-------|-------|
| YGR016W   |       | 1578  | 1606  | 0.98 | -0.03 | -0.14 | -0.50 |
| YER149C   | PEA2  | 6236  | 6349  | 0.98 | -0.03 | -0.14 | -0.50 |
| YNL197C   | WHI3  | 6082  | 6192  | 0.98 | -0.03 | -0.14 | -0.50 |
| YOR063W   | RPL3  | 40100 | 40826 | 0.98 | -0.03 | -0.14 | -0.50 |
| YPL026C   | SKS1  | 1572  | 1601  | 0.98 | -0.03 | -0.14 | -0.50 |
| YMR135C   |       | 5146  | 5241  | 0.98 | -0.03 | -0.14 | -0.51 |
| YDL189W   |       | 9729  | 9910  | 0.98 | -0.03 | -0.14 | -0.51 |
| YBR166C   | TYR1  | 7908  | 8056  | 0.98 | -0.03 | -0.14 | -0.51 |
| YOR187W   | TUF1  | 37545 | 38246 | 0.98 | -0.03 | -0.14 | -0.51 |
| YMR062C   | ECM40 | 14018 | 14280 | 0.98 | -0.03 | -0.14 | -0.51 |
| YBR233W   | PBP2  | 5651  | 5758  | 0.98 | -0.03 | -0.14 | -0.51 |
| YLR446W   |       | 2358  | 2403  | 0.98 | -0.03 | -0.14 | -0.51 |
| YJL117W   | PHO86 | 18020 | 18365 | 0.98 | -0.03 | -0.14 | -0.51 |
| YOR035C   | SHE4  | 837   | 853   | 0.98 | -0.03 | -0.14 | -0.51 |
| YOL067C   | RTG1  | 2041  | 2081  | 0.98 | -0.03 | -0.14 | -0.51 |
| YOR221C   | MCT1  | 4012  | 4091  | 0.98 | -0.03 | -0.14 | -0.51 |
| YNL317W   | PFS2  | 7770  | 7923  | 0.98 | -0.03 | -0.14 | -0.51 |
| YLR426W   |       | 9323  | 9509  | 0.98 | -0.03 | -0.14 | -0.51 |
| YDL165W   | CDC36 | 7543  | 7694  | 0.98 | -0.03 | -0.14 | -0.51 |
| YLR033W   |       | 6913  | 7052  | 0.98 | -0.03 | -0.14 | -0.51 |
| YHR108W   |       | 2306  | 2353  | 0.98 | -0.03 | -0.14 | -0.51 |
| YLL049W   |       | 6675  | 6811  | 0.98 | -0.03 | -0.14 | -0.51 |
| YML102C-A |       | 1599  | 1632  | 0.98 | -0.03 | -0.14 | -0.51 |
| YGR189C   | CRH1  | 2291  | 2338  | 0.98 | -0.03 | -0.14 | -0.51 |
| YPL020C   | ULP1  | 4083  | 4167  | 0.98 | -0.03 | -0.14 | -0.51 |
| YIL164C   | NIT1  | 6394  | 6525  | 0.98 | -0.03 | -0.14 | -0.52 |
| YMR201C   | RAD14 | 3989  | 4071  | 0.98 | -0.03 | -0.14 | -0.52 |
| YJL054W   | TIM54 | 9273  | 9466  | 0.98 | -0.03 | -0.14 | -0.52 |
| YJL111W   | CCT7  | 12630 | 12896 | 0.98 | -0.03 | -0.14 | -0.52 |
| YOR002W   | ALG6  | 11758 | 12006 | 0.98 | -0.03 | -0.14 | -0.52 |
| YIRO09W   | MSL1  | 4048  | 4134  | 0.98 | -0.03 | -0.14 | -0.52 |
| YOR134W   | BAG7  | 634   | 648   | 0.98 | -0.03 | -0.14 | -0.52 |
| YOR151C   | RPB2  | 19744 | 20174 | 0.98 | -0.03 | -0.14 | -0.52 |
| YMR231W   | PEP5  | 3128  | 3196  | 0.98 | -0.03 | -0.14 | -0.52 |
| YIRO39C   | YPS6  | 1394  | 1425  | 0.98 | -0.03 | -0.14 | -0.52 |
| YDL014W   | NOP1  | 25013 | 25563 | 0.98 | -0.03 | -0.14 | -0.52 |

|         |       |       |       |      |       |       |       |
|---------|-------|-------|-------|------|-------|-------|-------|
| YCR095C |       | 5329  | 5446  | 0.98 | -0.03 | -0.14 | -0.52 |
| YCR076C |       | 3325  | 3398  | 0.98 | -0.03 | -0.14 | -0.52 |
| YJL004C | SYS1  | 18018 | 18419 | 0.98 | -0.03 | -0.14 | -0.52 |
| YOR130C | ORT1  | 4897  | 5007  | 0.98 | -0.03 | -0.14 | -0.53 |
| YMR311C | GLC8  | 10633 | 10873 | 0.98 | -0.03 | -0.14 | -0.53 |
| YDL225W | SHS1  | 6582  | 6731  | 0.98 | -0.03 | -0.14 | -0.53 |
| YBR087W | RFC5  | 9385  | 9597  | 0.98 | -0.03 | -0.14 | -0.53 |
| YNL153C | GIM3  | 11963 | 12237 | 0.98 | -0.03 | -0.15 | -0.53 |
| YIL032C |       | 1036  | 1060  | 0.98 | -0.03 | -0.15 | -0.53 |
| YIL005W |       | 9377  | 9592  | 0.98 | -0.03 | -0.15 | -0.53 |
| YOR232W | MGE1  | 15710 | 16073 | 0.98 | -0.03 | -0.15 | -0.53 |
| YOR259C | RPT4  | 12785 | 13082 | 0.98 | -0.03 | -0.15 | -0.53 |
| YMR148W |       | 3655  | 3741  | 0.98 | -0.03 | -0.15 | -0.53 |
| YPL274W | SAM3  | 14257 | 14593 | 0.98 | -0.03 | -0.15 | -0.53 |
| YLR412W |       | 14402 | 14742 | 0.98 | -0.03 | -0.15 | -0.53 |
| YOR390W |       | 12936 | 13242 | 0.98 | -0.03 | -0.15 | -0.53 |
| YDR430C |       | 5103  | 5224  | 0.98 | -0.03 | -0.15 | -0.53 |
| YLR290C |       | 5110  | 5231  | 0.98 | -0.03 | -0.15 | -0.53 |
| YOL139C | CDC33 | 26701 | 27338 | 0.98 | -0.03 | -0.15 | -0.53 |
| YHR098C | SFB3  | 6995  | 7163  | 0.98 | -0.03 | -0.15 | -0.53 |
| YJL147C |       | 2144  | 2195  | 0.98 | -0.03 | -0.15 | -0.53 |
| YHR184W | SSP1  | 4925  | 5044  | 0.98 | -0.03 | -0.15 | -0.53 |
| YKL056C |       | 39691 | 40646 | 0.98 | -0.03 | -0.15 | -0.53 |
| YBR239C |       | 12585 | 12888 | 0.98 | -0.03 | -0.15 | -0.53 |
| YOL040C | RPS15 | 27046 | 27698 | 0.98 | -0.03 | -0.15 | -0.53 |
| YKL043W | PHD1  | 2671  | 2736  | 0.98 | -0.03 | -0.15 | -0.53 |
| YDR050C | TPI1  | 28556 | 29249 | 0.98 | -0.03 | -0.15 | -0.53 |
| YDL199C |       | 4455  | 4564  | 0.98 | -0.03 | -0.15 | -0.54 |
| YML100W | TSL1  | 7237  | 7415  | 0.98 | -0.04 | -0.15 | -0.54 |
| YLL061W | MMP1  | 6282  | 6436  | 0.98 | -0.04 | -0.15 | -0.54 |
| YER086W | ILV1  | 6735  | 6902  | 0.98 | -0.04 | -0.15 | -0.54 |
| YPL203W | PKA3  | 2643  | 2708  | 0.98 | -0.04 | -0.15 | -0.54 |
| YCR069W | SCC3  | 18187 | 18639 | 0.98 | -0.04 | -0.15 | -0.54 |
| YOL003C |       | 10399 | 10660 | 0.98 | -0.04 | -0.15 | -0.54 |
| YNL046W |       | 4421  | 4533  | 0.98 | -0.04 | -0.15 | -0.54 |
| YGL155W | CDC43 | 4294  | 4403  | 0.98 | -0.04 | -0.15 | -0.54 |

|         |       |       |       |      |       |       |       |
|---------|-------|-------|-------|------|-------|-------|-------|
| YMR139W | RIM11 | 7865  | 8065  | 0.98 | -0.04 | -0.15 | -0.54 |
| YGL067W |       | 10932 | 11212 | 0.98 | -0.04 | -0.15 | -0.54 |
| YGR255C | COQ6  | 2868  | 2942  | 0.97 | -0.04 | -0.15 | -0.54 |
| YNL283C | WSC2  | 13278 | 13621 | 0.97 | -0.04 | -0.15 | -0.54 |
| YIL050W | PCL7  | 17561 | 18015 | 0.97 | -0.04 | -0.15 | -0.54 |
| YML038C | YMD8  | 16589 | 17020 | 0.97 | -0.04 | -0.15 | -0.54 |
| YKR022C |       | 3824  | 3923  | 0.97 | -0.04 | -0.15 | -0.54 |
| YLR206W | ENT2  | 5830  | 5982  | 0.97 | -0.04 | -0.15 | -0.54 |
| YPR028W | YIP2  | 23835 | 24456 | 0.97 | -0.04 | -0.15 | -0.54 |
| YHR209W |       | 1174  | 1205  | 0.97 | -0.04 | -0.15 | -0.54 |
| YER144C | UBP5  | 7405  | 7599  | 0.97 | -0.04 | -0.15 | -0.54 |
| YLR231C |       | 2041  | 2095  | 0.97 | -0.04 | -0.15 | -0.55 |
| YHL049C |       | 5847  | 6002  | 0.97 | -0.04 | -0.15 | -0.55 |
| YGR182C |       | 17213 | 17670 | 0.97 | -0.04 | -0.15 | -0.55 |
| YJR044C |       | 14185 | 14562 | 0.97 | -0.04 | -0.15 | -0.55 |
| YDL012C |       | 8431  | 8655  | 0.97 | -0.04 | -0.15 | -0.55 |
| YER034W |       | 12178 | 12502 | 0.97 | -0.04 | -0.15 | -0.55 |
| YGL062W | PYC1  | 468   | 480   | 0.97 | -0.04 | -0.15 | -0.55 |
| YFL030W |       | 1318  | 1353  | 0.97 | -0.04 | -0.15 | -0.55 |
| YMR169C | ALD3  | 4365  | 4482  | 0.97 | -0.04 | -0.15 | -0.55 |
| YKL181W | PRS1  | 11747 | 12062 | 0.97 | -0.04 | -0.15 | -0.55 |
| YNR020C |       | 6726  | 6907  | 0.97 | -0.04 | -0.15 | -0.55 |
| YHL032C | GUT1  | 2830  | 2906  | 0.97 | -0.04 | -0.15 | -0.55 |
| YPR045C |       | 5578  | 5728  | 0.97 | -0.04 | -0.15 | -0.55 |
| YDR504C |       | 1979  | 2033  | 0.97 | -0.04 | -0.15 | -0.55 |
| YDR486C |       | 10802 | 11097 | 0.97 | -0.04 | -0.15 | -0.55 |
| YMR073C |       | 6723  | 6907  | 0.97 | -0.04 | -0.15 | -0.55 |
| YLR386W |       | 2163  | 2222  | 0.97 | -0.04 | -0.15 | -0.55 |
| YJL156C | SSY5  | 3426  | 3520  | 0.97 | -0.04 | -0.15 | -0.55 |
| YNL288W |       | 6154  | 6324  | 0.97 | -0.04 | -0.15 | -0.55 |
| YIL001W |       | 6407  | 6584  | 0.97 | -0.04 | -0.15 | -0.55 |
| YKR052C | MRS4  | 2823  | 2901  | 0.97 | -0.04 | -0.15 | -0.55 |
| YDL178W | AIP2  | 5621  | 5777  | 0.97 | -0.04 | -0.15 | -0.55 |
| YPR081C |       | 2831  | 2910  | 0.97 | -0.04 | -0.15 | -0.55 |
| YBR089W |       | 14884 | 15303 | 0.97 | -0.04 | -0.15 | -0.55 |
| YLR226W | BUR2  | 2942  | 3025  | 0.97 | -0.04 | -0.15 | -0.55 |

|         |       |       |       |      |       |       |       |
|---------|-------|-------|-------|------|-------|-------|-------|
| YJL066C |       | 12107 | 12450 | 0.97 | -0.04 | -0.15 | -0.56 |
| YDR327W |       | 7241  | 7447  | 0.97 | -0.04 | -0.15 | -0.56 |
| YGR226C |       | 1230  | 1266  | 0.97 | -0.04 | -0.15 | -0.56 |
| YLR420W | URA4  | 11408 | 11740 | 0.97 | -0.04 | -0.15 | -0.56 |
| YOR064C |       | 3271  | 3367  | 0.97 | -0.04 | -0.15 | -0.56 |
| YDL203C |       | 9811  | 10099 | 0.97 | -0.04 | -0.15 | -0.56 |
| YFR049W | YMR31 | 6113  | 6293  | 0.97 | -0.04 | -0.15 | -0.56 |
| YGR252W | GCN5  | 8224  | 8470  | 0.97 | -0.04 | -0.15 | -0.56 |
| YDL234C | GYP7  | 2986  | 3075  | 0.97 | -0.04 | -0.15 | -0.56 |
| YKL024C | URA6  | 14294 | 14722 | 0.97 | -0.04 | -0.15 | -0.56 |
| YGR130C |       | 8146  | 8391  | 0.97 | -0.04 | -0.16 | -0.56 |
| YMR071C |       | 16115 | 16600 | 0.97 | -0.04 | -0.16 | -0.56 |
| YDR131C |       | 2056  | 2118  | 0.97 | -0.04 | -0.16 | -0.56 |
| YGR184C | UBR1  | 1058  | 1090  | 0.97 | -0.04 | -0.16 | -0.56 |
| YOR013W |       | 2246  | 2314  | 0.97 | -0.04 | -0.16 | -0.56 |
| YOR081C |       | 1967  | 2027  | 0.97 | -0.04 | -0.16 | -0.57 |
| YGL077C | HNM1  | 8619  | 8883  | 0.97 | -0.04 | -0.16 | -0.57 |
| YDR492W |       | 7483  | 7713  | 0.97 | -0.04 | -0.16 | -0.57 |
| YLL019C | KNS1  | 6585  | 6788  | 0.97 | -0.04 | -0.16 | -0.57 |
| YHR035W |       | 18627 | 19203 | 0.97 | -0.04 | -0.16 | -0.57 |
| YPR033C | HTS1  | 17806 | 18357 | 0.97 | -0.04 | -0.16 | -0.57 |
| YLR041W |       | 21009 | 21662 | 0.97 | -0.04 | -0.16 | -0.57 |
| YMR301C | ATM1  | 9654  | 9955  | 0.97 | -0.04 | -0.16 | -0.57 |
| YCL011C | GBP2  | 31074 | 32047 | 0.97 | -0.04 | -0.16 | -0.57 |
| YJL168C | SET2  | 10901 | 11244 | 0.97 | -0.04 | -0.16 | -0.57 |
| YOR265W | RBL2  | 3815  | 3936  | 0.97 | -0.04 | -0.16 | -0.57 |
| YCR038C | BUD5  | 1783  | 1839  | 0.97 | -0.04 | -0.16 | -0.57 |
| YBR118W | TEF2  | 63427 | 65436 | 0.97 | -0.04 | -0.16 | -0.57 |
| YLR095C |       | 1895  | 1955  | 0.97 | -0.05 | -0.16 | -0.57 |
| YKR007W |       | 7532  | 7773  | 0.97 | -0.05 | -0.16 | -0.57 |
| YNL085W | MKT1  | 4313  | 4452  | 0.97 | -0.05 | -0.16 | -0.57 |
| YKL124W | SSH4  | 1363  | 1407  | 0.97 | -0.05 | -0.16 | -0.58 |
| YBR129C | OPY1  | 5960  | 6154  | 0.97 | -0.05 | -0.16 | -0.58 |
| YDL188C | PPH22 | 7367  | 7609  | 0.97 | -0.05 | -0.16 | -0.58 |
| YGR285C | ZUO1  | 29932 | 30924 | 0.97 | -0.05 | -0.16 | -0.58 |
| YHR012W | VPS29 | 11884 | 12281 | 0.97 | -0.05 | -0.16 | -0.58 |

|           |        |       |       |      |       |       |       |
|-----------|--------|-------|-------|------|-------|-------|-------|
| YML045W   |        | 55763 | 57632 | 0.97 | -0.05 | -0.16 | -0.58 |
| YBL010C   |        | 6671  | 6895  | 0.97 | -0.05 | -0.16 | -0.58 |
| YNR035C   | ARC35  | 15470 | 15989 | 0.97 | -0.05 | -0.16 | -0.58 |
| YBR265W   | TSC10  | 15515 | 16039 | 0.97 | -0.05 | -0.16 | -0.58 |
| YMR087W   |        | 2319  | 2397  | 0.97 | -0.05 | -0.16 | -0.58 |
| YNL334C   | SNO2   | 1679  | 1736  | 0.97 | -0.05 | -0.16 | -0.58 |
| YHR031C   | RTT104 | 2977  | 3079  | 0.97 | -0.05 | -0.16 | -0.58 |
| YGR231C   | PHB2   | 12571 | 13001 | 0.97 | -0.05 | -0.16 | -0.58 |
| YOR174W   | MED4   | 4503  | 4658  | 0.97 | -0.05 | -0.16 | -0.59 |
| YLR330W   | CHS5   | 6402  | 6623  | 0.97 | -0.05 | -0.16 | -0.59 |
| YKL129C   | MYO3   | 7126  | 7373  | 0.97 | -0.05 | -0.16 | -0.59 |
| YPL249C   |        | 2962  | 3065  | 0.97 | -0.05 | -0.16 | -0.59 |
| YCR088W   | ABP1   | 9187  | 9505  | 0.97 | -0.05 | -0.16 | -0.59 |
| YLR396C   | VPS33  | 3332  | 3447  | 0.97 | -0.05 | -0.16 | -0.59 |
| YDL208W   | NHP2   | 15463 | 15999 | 0.97 | -0.05 | -0.16 | -0.59 |
| YAR002C-A | ERP1   | 679   | 703   | 0.97 | -0.05 | -0.16 | -0.59 |
| YMR108W   | ILV2   | 18216 | 18849 | 0.97 | -0.05 | -0.16 | -0.59 |
| YLL039C   | UBI4   | 7485  | 7745  | 0.97 | -0.05 | -0.16 | -0.59 |
| YDR253C   | MET32  | 1899  | 1965  | 0.97 | -0.05 | -0.16 | -0.59 |
| YMR066W   | SOV1   | 668   | 692   | 0.97 | -0.05 | -0.16 | -0.59 |
| YKL141W   | SDH3   | 20530 | 21255 | 0.97 | -0.05 | -0.16 | -0.59 |
| YOR297C   | TIM18  | 5029  | 5207  | 0.97 | -0.05 | -0.16 | -0.59 |
| YBR163W   | DEM1   | 8770  | 9080  | 0.97 | -0.05 | -0.16 | -0.59 |
| YOL012C   | HTA3   | 6554  | 6787  | 0.97 | -0.05 | -0.16 | -0.59 |
| YBR286W   | APE3   | 21296 | 22055 | 0.97 | -0.05 | -0.16 | -0.59 |
| YIL077C   |        | 3564  | 3691  | 0.97 | -0.05 | -0.16 | -0.59 |
| YMR079W   | SEC14  | 25263 | 26167 | 0.97 | -0.05 | -0.16 | -0.59 |
| YKL212W   | SAC1   | 545   | 565   | 0.97 | -0.05 | -0.16 | -0.59 |
| YLR388W   | RPS29A | 29702 | 30770 | 0.97 | -0.05 | -0.16 | -0.59 |
| YML013W   |        | 2176  | 2255  | 0.97 | -0.05 | -0.16 | -0.59 |
| YBR213W   | MET8   | 2209  | 2289  | 0.97 | -0.05 | -0.16 | -0.59 |
| YLL040C   | VPS13  | 679   | 704   | 0.97 | -0.05 | -0.16 | -0.60 |
| YPL024W   | NCE4   | 4004  | 4149  | 0.97 | -0.05 | -0.16 | -0.60 |
| YNL111C   | CYB5   | 10422 | 10802 | 0.96 | -0.05 | -0.16 | -0.60 |
| YGR104C   | SRB5   | 15085 | 15636 | 0.96 | -0.05 | -0.16 | -0.60 |
| YGR170W   | PSD2   | 6599  | 6840  | 0.96 | -0.05 | -0.16 | -0.60 |

|           |        |       |       |      |       |       |       |
|-----------|--------|-------|-------|------|-------|-------|-------|
| YJR148W   | BAT2   | 27414 | 28421 | 0.96 | -0.05 | -0.16 | -0.60 |
| YAL040C   | CLN3   | 4938  | 5120  | 0.96 | -0.05 | -0.16 | -0.60 |
| YLR376C   |        | 2023  | 2098  | 0.96 | -0.05 | -0.16 | -0.60 |
| YJL145W   |        | 7424  | 7701  | 0.96 | -0.05 | -0.17 | -0.60 |
| YCRX02C   |        | 13763 | 14278 | 0.96 | -0.05 | -0.17 | -0.60 |
| YBL001C   | ECM15  | 5167  | 5361  | 0.96 | -0.05 | -0.17 | -0.60 |
| YDR373W   | FRQ1   | 19936 | 20687 | 0.96 | -0.05 | -0.17 | -0.60 |
| YGL245W   |        | 18502 | 19200 | 0.96 | -0.05 | -0.17 | -0.60 |
| YGR185C   | TYS1   | 26544 | 27548 | 0.96 | -0.05 | -0.17 | -0.60 |
| YER060W   | FCY21  | 1429  | 1483  | 0.96 | -0.05 | -0.17 | -0.60 |
| YDR192C   | NUP42  | 13405 | 13919 | 0.96 | -0.05 | -0.17 | -0.61 |
| YDR314C   |        | 1884  | 1956  | 0.96 | -0.05 | -0.17 | -0.61 |
| YNL193W   |        | 1910  | 1983  | 0.96 | -0.05 | -0.17 | -0.61 |
| YDL007W   | RPT2   | 18938 | 19666 | 0.96 | -0.05 | -0.17 | -0.61 |
| YDL161W   | ENT1   | 14581 | 15142 | 0.96 | -0.05 | -0.17 | -0.61 |
| YKR070W   |        | 3338  | 3467  | 0.96 | -0.05 | -0.17 | -0.61 |
| YPL232W   | SSO1   | 10943 | 11367 | 0.96 | -0.05 | -0.17 | -0.61 |
| YBR062C   |        | 2760  | 2867  | 0.96 | -0.05 | -0.17 | -0.61 |
| YJR018W   |        | 3114  | 3235  | 0.96 | -0.05 | -0.17 | -0.61 |
| YNL266W   |        | 2540  | 2639  | 0.96 | -0.06 | -0.17 | -0.61 |
| YLR390W   | ECM19  | 3345  | 3476  | 0.96 | -0.06 | -0.17 | -0.61 |
| YML009C   | MRPL39 | 16552 | 17204 | 0.96 | -0.06 | -0.17 | -0.61 |
| YMR209C   |        | 4127  | 4290  | 0.96 | -0.06 | -0.17 | -0.61 |
| YMR112C   | MED11  | 5359  | 5572  | 0.96 | -0.06 | -0.17 | -0.61 |
| YMR028W   | TAP42  | 3422  | 3558  | 0.96 | -0.06 | -0.17 | -0.61 |
| YLR342W   | FKS1   | 5835  | 6068  | 0.96 | -0.06 | -0.17 | -0.61 |
| YML010W-A |        | 2489  | 2589  | 0.96 | -0.06 | -0.17 | -0.61 |
| YOL068C   | HST1   | 12822 | 13335 | 0.96 | -0.06 | -0.17 | -0.61 |
| YJL167W   | ERG20  | 11885 | 12362 | 0.96 | -0.06 | -0.17 | -0.62 |
| YOR253W   |        | 19118 | 19892 | 0.96 | -0.06 | -0.17 | -0.62 |
| YJL138C   | TIF2   | 62883 | 65432 | 0.96 | -0.06 | -0.17 | -0.62 |
| YER055C   | HIS1   | 24666 | 25667 | 0.96 | -0.06 | -0.17 | -0.62 |
| YHR097C   |        | 5943  | 6184  | 0.96 | -0.06 | -0.17 | -0.62 |
| YMR226C   |        | 5698  | 5930  | 0.96 | -0.06 | -0.17 | -0.62 |
| YPRO94W   |        | 11166 | 11621 | 0.96 | -0.06 | -0.17 | -0.62 |
| YDR362C   | TFC6   | 2160  | 2248  | 0.96 | -0.06 | -0.17 | -0.62 |

|           |       |       |       |      |       |       |       |
|-----------|-------|-------|-------|------|-------|-------|-------|
| YBR128C   | APG14 | 4369  | 4548  | 0.96 | -0.06 | -0.17 | -0.62 |
| YNL081C   |       | 10127 | 10544 | 0.96 | -0.06 | -0.17 | -0.62 |
| YDL139C   |       | 3397  | 3537  | 0.96 | -0.06 | -0.17 | -0.62 |
| YKL121W   |       | 2554  | 2659  | 0.96 | -0.06 | -0.17 | -0.62 |
| YGL022W   | STT3  | 8472  | 8825  | 0.96 | -0.06 | -0.17 | -0.62 |
| YPL053C   | KTR6  | 8235  | 8579  | 0.96 | -0.06 | -0.17 | -0.62 |
| YAL007C   | ERP2  | 6272  | 6534  | 0.96 | -0.06 | -0.17 | -0.62 |
| YHR049C-A |       | 13334 | 13897 | 0.96 | -0.06 | -0.17 | -0.63 |
| YHR177W   |       | 2059  | 2146  | 0.96 | -0.06 | -0.17 | -0.63 |
| YPR161C   | SGV1  | 14737 | 15363 | 0.96 | -0.06 | -0.17 | -0.63 |
| YHR200W   | RPN10 | 659   | 687   | 0.96 | -0.06 | -0.17 | -0.63 |
| YCR074C   |       | 1490  | 1554  | 0.96 | -0.06 | -0.17 | -0.63 |
| YJR139C   | HOM6  | 18055 | 18835 | 0.96 | -0.06 | -0.17 | -0.63 |
| YML126C   | HMGS  | 27784 | 28989 | 0.96 | -0.06 | -0.17 | -0.63 |
| YKL218C   | SRY1  | 1273  | 1328  | 0.96 | -0.06 | -0.17 | -0.63 |
| YMR054W   | STV1  | 1435  | 1498  | 0.96 | -0.06 | -0.17 | -0.63 |
| YOR061W   | CKA2  | 26316 | 27465 | 0.96 | -0.06 | -0.17 | -0.63 |
| YPL238C   |       | 17552 | 18321 | 0.96 | -0.06 | -0.17 | -0.63 |
| YNL223W   | AUT2  | 1532  | 1600  | 0.96 | -0.06 | -0.17 | -0.63 |
| YGL040C   | HEM2  | 10845 | 11323 | 0.96 | -0.06 | -0.17 | -0.64 |
| YEL056W   | HAT2  | 5662  | 5912  | 0.96 | -0.06 | -0.17 | -0.64 |
| YCLX01W   |       | 6331  | 6610  | 0.96 | -0.06 | -0.17 | -0.64 |
| YER007W   | PAC2  | 1795  | 1875  | 0.96 | -0.06 | -0.18 | -0.64 |
| YHR082C   | KSP1  | 1178  | 1231  | 0.96 | -0.06 | -0.18 | -0.64 |
| YPR185W   | APG13 | 8025  | 8383  | 0.96 | -0.06 | -0.18 | -0.64 |
| YPL169C   | MEX67 | 7763  | 8111  | 0.96 | -0.06 | -0.18 | -0.64 |
| YKR044W   |       | 715   | 747   | 0.96 | -0.06 | -0.18 | -0.64 |
| YKL209C   | STE6  | 725   | 757   | 0.96 | -0.06 | -0.18 | -0.64 |
| YIL104C   |       | 16934 | 17693 | 0.96 | -0.06 | -0.18 | -0.64 |
| YHR139C-A |       | 12860 | 13437 | 0.96 | -0.06 | -0.18 | -0.64 |
| YDR544C   |       | 3420  | 3574  | 0.96 | -0.06 | -0.18 | -0.64 |
| YMR060C   | TOM37 | 7546  | 7886  | 0.96 | -0.06 | -0.18 | -0.64 |
| YGR012W   |       | 5431  | 5676  | 0.96 | -0.06 | -0.18 | -0.64 |
| YGR201C   |       | 3705  | 3872  | 0.96 | -0.06 | -0.18 | -0.64 |
| YBL012C   |       | 7314  | 7644  | 0.96 | -0.06 | -0.18 | -0.64 |
| YBR277C   |       | 5106  | 5337  | 0.96 | -0.06 | -0.18 | -0.64 |



|         |       |       |       |      |       |       |       |
|---------|-------|-------|-------|------|-------|-------|-------|
| YKR061W | KTR2  | 3582  | 3744  | 0.96 | -0.06 | -0.18 | -0.64 |
| YJL002C | OST1  | 27725 | 28983 | 0.96 | -0.06 | -0.18 | -0.64 |
| YMR289W |       | 9284  | 9705  | 0.96 | -0.06 | -0.18 | -0.64 |
| YNR041C | COQ2  | 5100  | 5332  | 0.96 | -0.06 | -0.18 | -0.64 |
| YMR263W |       | 17569 | 18369 | 0.96 | -0.06 | -0.18 | -0.64 |
| YPL096W |       | 7773  | 8128  | 0.96 | -0.06 | -0.18 | -0.64 |
| YPR047W | MSF1  | 2483  | 2596  | 0.96 | -0.06 | -0.18 | -0.64 |
| YCR011C | ADP1  | 2100  | 2196  | 0.96 | -0.06 | -0.18 | -0.64 |
| YKL147C |       | 5165  | 5402  | 0.96 | -0.06 | -0.18 | -0.64 |
| YOL009C | MDM12 | 7653  | 8006  | 0.96 | -0.07 | -0.18 | -0.65 |
| YGL207W | SPT16 | 3724  | 3896  | 0.96 | -0.07 | -0.18 | -0.65 |
| YDR200C |       | 10287 | 10763 | 0.96 | -0.07 | -0.18 | -0.65 |
| YBR228W |       | 3526  | 3689  | 0.96 | -0.07 | -0.18 | -0.65 |
| YPR175W | DPB2  | 10703 | 11200 | 0.96 | -0.07 | -0.18 | -0.65 |
| YOL026C |       | 9848  | 10307 | 0.96 | -0.07 | -0.18 | -0.65 |
| YNR007C | AUT1  | 2704  | 2830  | 0.96 | -0.07 | -0.18 | -0.65 |
| YDL064W | UBC9  | 20548 | 21508 | 0.96 | -0.07 | -0.18 | -0.65 |
| YBR068C | BAP2  | 16898 | 17689 | 0.96 | -0.07 | -0.18 | -0.65 |
| YIL003W |       | 11280 | 11810 | 0.96 | -0.07 | -0.18 | -0.65 |
| YMR152W | YIM1  | 8198  | 8584  | 0.96 | -0.07 | -0.18 | -0.65 |
| YDR512C |       | 3828  | 4008  | 0.96 | -0.07 | -0.18 | -0.65 |
| YIL146C | ECM37 | 1523  | 1595  | 0.95 | -0.07 | -0.18 | -0.65 |
| YLR175W | CBF5  | 42402 | 44421 | 0.95 | -0.07 | -0.18 | -0.65 |
| YGR106C |       | 12707 | 13313 | 0.95 | -0.07 | -0.18 | -0.65 |
| YNL181W |       | 8637  | 9050  | 0.95 | -0.07 | -0.18 | -0.65 |
| YGL237C | HAP2  | 4521  | 4737  | 0.95 | -0.07 | -0.18 | -0.65 |
| YJL104W |       | 30369 | 31822 | 0.95 | -0.07 | -0.18 | -0.65 |
| YFR041C |       | 5187  | 5435  | 0.95 | -0.07 | -0.18 | -0.65 |
| YDL052C | SLC1  | 6298  | 6600  | 0.95 | -0.07 | -0.18 | -0.65 |
| YPL067C |       | 3921  | 4109  | 0.95 | -0.07 | -0.18 | -0.65 |
| YDR306C |       | 518   | 543   | 0.95 | -0.07 | -0.18 | -0.65 |
| YGR172C | YIP1  | 18782 | 19685 | 0.95 | -0.07 | -0.18 | -0.66 |
| YNL052W | COX5A | 28491 | 29864 | 0.95 | -0.07 | -0.18 | -0.66 |
| YJR118C | ILM1  | 16079 | 16856 | 0.95 | -0.07 | -0.18 | -0.66 |
| YOR115C | TRS33 | 16410 | 17205 | 0.95 | -0.07 | -0.18 | -0.66 |
| YPR037C |       | 6465  | 6778  | 0.95 | -0.07 | -0.18 | -0.66 |

|           |       |       |       |      |       |       |       |
|-----------|-------|-------|-------|------|-------|-------|-------|
| YOL161C   |       | 1233  | 1293  | 0.95 | -0.07 | -0.18 | -0.66 |
| YDL160C   | DHH1  | 12529 | 13138 | 0.95 | -0.07 | -0.18 | -0.66 |
| YFL018W-A |       | 6172  | 6473  | 0.95 | -0.07 | -0.18 | -0.66 |
| YJR065C   | ARP3  | 5010  | 5255  | 0.95 | -0.07 | -0.18 | -0.66 |
| YOR095C   | RKI1  | 34008 | 35673 | 0.95 | -0.07 | -0.18 | -0.66 |
| YOR299W   | BUD7  | 1795  | 1883  | 0.95 | -0.07 | -0.18 | -0.66 |
| YGL101W   |       | 17702 | 18571 | 0.95 | -0.07 | -0.18 | -0.66 |
| YOR283W   |       | 7844  | 8230  | 0.95 | -0.07 | -0.18 | -0.66 |
| YDR186C   |       | 1290  | 1354  | 0.95 | -0.07 | -0.18 | -0.66 |
| YDL099W   |       | 5630  | 5907  | 0.95 | -0.07 | -0.18 | -0.66 |
| YNL335W   |       | 1828  | 1918  | 0.95 | -0.07 | -0.18 | -0.66 |
| YGR082W   | TOM20 | 25850 | 27130 | 0.95 | -0.07 | -0.18 | -0.66 |
| YCR020C-A | MAK31 | 16667 | 17494 | 0.95 | -0.07 | -0.18 | -0.66 |
| YHL031C   | GOS1  | 15729 | 16514 | 0.95 | -0.07 | -0.18 | -0.66 |
| YLR237W   | THI7  | 2186  | 2295  | 0.95 | -0.07 | -0.18 | -0.66 |
| YDR089W   |       | 901   | 946   | 0.95 | -0.07 | -0.18 | -0.66 |
| YGL247W   |       | 6138  | 6446  | 0.95 | -0.07 | -0.18 | -0.67 |
| YIL033C   | SRA1  | 6822  | 7165  | 0.95 | -0.07 | -0.18 | -0.67 |
| YNR058W   | BIO3  | 3680  | 3866  | 0.95 | -0.07 | -0.18 | -0.67 |
| YPL247C   |       | 5954  | 6255  | 0.95 | -0.07 | -0.18 | -0.67 |
| YAR044W   | OSH1  | 429   | 451   | 0.95 | -0.07 | -0.18 | -0.67 |
| YLR076C   |       | 42793 | 44966 | 0.95 | -0.07 | -0.18 | -0.67 |
| YML095C   | RAD10 | 3356  | 3527  | 0.95 | -0.07 | -0.18 | -0.67 |
| YJL072C   |       | 26580 | 27933 | 0.95 | -0.07 | -0.18 | -0.67 |
| YNL045W   |       | 4965  | 5218  | 0.95 | -0.07 | -0.18 | -0.67 |
| YGR198W   |       | 7649  | 8039  | 0.95 | -0.07 | -0.18 | -0.67 |
| YFR044C   |       | 21788 | 22902 | 0.95 | -0.07 | -0.18 | -0.67 |
| YOR142W   | LSC1  | 13609 | 14305 | 0.95 | -0.07 | -0.18 | -0.67 |
| YNL135C   | FPR1  | 15882 | 16695 | 0.95 | -0.07 | -0.18 | -0.67 |
| YGR138C   |       | 9673  | 10169 | 0.95 | -0.07 | -0.18 | -0.67 |
| YGL143C   | MRF1  | 5312  | 5586  | 0.95 | -0.07 | -0.18 | -0.67 |
| YLR157C-A | TyA   | 11133 | 11707 | 0.95 | -0.07 | -0.18 | -0.67 |
| YIR022W   | SEC11 | 16019 | 16846 | 0.95 | -0.07 | -0.19 | -0.67 |
| YML057W   | CMP2  | 5460  | 5742  | 0.95 | -0.07 | -0.19 | -0.67 |
| YBR254C   | TRS20 | 5758  | 6056  | 0.95 | -0.07 | -0.19 | -0.67 |
| YDL144C   |       | 5669  | 5963  | 0.95 | -0.07 | -0.19 | -0.67 |

|         |           |       |       |      |       |       |       |
|---------|-----------|-------|-------|------|-------|-------|-------|
| YKL013C | ARC19     | 16782 | 17652 | 0.95 | -0.07 | -0.19 | -0.67 |
| YOL073C |           | 8540  | 8984  | 0.95 | -0.07 | -0.19 | -0.67 |
| YML123C | PHO84     | 44791 | 47134 | 0.95 | -0.07 | -0.19 | -0.68 |
| YBL062W |           | 10163 | 10695 | 0.95 | -0.07 | -0.19 | -0.68 |
| YMR296C | LCB1      | 8179  | 8609  | 0.95 | -0.07 | -0.19 | -0.68 |
| YLL020C |           | 1065  | 1121  | 0.95 | -0.07 | -0.19 | -0.68 |
| YGR278W |           | 2280  | 2401  | 0.95 | -0.07 | -0.19 | -0.68 |
| YPL225W |           | 35710 | 37602 | 0.95 | -0.07 | -0.19 | -0.68 |
| YDL006W | PTC1      | 3061  | 3223  | 0.95 | -0.07 | -0.19 | -0.68 |
| YCR040W | MATALPHA1 | 7329  | 7718  | 0.95 | -0.07 | -0.19 | -0.68 |
| YGR153W |           | 1191  | 1254  | 0.95 | -0.07 | -0.19 | -0.68 |
| YDL095W | PMT1      | 3936  | 4145  | 0.95 | -0.07 | -0.19 | -0.68 |
| YLR211C |           | 25613 | 26982 | 0.95 | -0.08 | -0.19 | -0.68 |
| YML027W | YOX1      | 3390  | 3572  | 0.95 | -0.08 | -0.19 | -0.68 |
| YPL064C |           | 12746 | 13430 | 0.95 | -0.08 | -0.19 | -0.68 |
| YILO41W |           | 12350 | 13013 | 0.95 | -0.08 | -0.19 | -0.68 |
| YDR272W | GLO2      | 9139  | 9631  | 0.95 | -0.08 | -0.19 | -0.68 |
| YKR088C |           | 4074  | 4294  | 0.95 | -0.08 | -0.19 | -0.68 |
| YLL050C | COF1      | 17430 | 18372 | 0.95 | -0.08 | -0.19 | -0.68 |
| YOR327C | SNC2      | 15783 | 16638 | 0.95 | -0.08 | -0.19 | -0.69 |
| YMR020W | FMS1      | 2153  | 2270  | 0.95 | -0.08 | -0.19 | -0.69 |
| YBR193C | MED8      | 6729  | 7094  | 0.95 | -0.08 | -0.19 | -0.69 |
| YDR067C |           | 3329  | 3510  | 0.95 | -0.08 | -0.19 | -0.69 |
| YCR046C | IMG1      | 7632  | 8049  | 0.95 | -0.08 | -0.19 | -0.69 |
| YNR002C | FUN34     | 8817  | 9300  | 0.95 | -0.08 | -0.19 | -0.69 |
| YJL112W |           | 14247 | 15029 | 0.95 | -0.08 | -0.19 | -0.69 |
| YCR012W | PGK1      | 16443 | 17345 | 0.95 | -0.08 | -0.19 | -0.69 |
| YPL224C | MMT2      | 3184  | 3359  | 0.95 | -0.08 | -0.19 | -0.69 |
| YCL050C | APA1      | 971   | 1024  | 0.95 | -0.08 | -0.19 | -0.69 |
| YILO89W |           | 3753  | 3959  | 0.95 | -0.08 | -0.19 | -0.69 |
| YILO87C |           | 6063  | 6398  | 0.95 | -0.08 | -0.19 | -0.69 |
| YGR276C | RNH70     | 6846  | 7225  | 0.95 | -0.08 | -0.19 | -0.69 |
| YKL105C |           | 729   | 769   | 0.95 | -0.08 | -0.19 | -0.69 |
| YLR218C |           | 984   | 1039  | 0.95 | -0.08 | -0.19 | -0.69 |
| YCL020W |           | 28853 | 30461 | 0.95 | -0.08 | -0.19 | -0.69 |
| YGL259W | YPS5      | 435   | 459   | 0.95 | -0.08 | -0.19 | -0.69 |

|         |       |       |       |      |       |       |       |
|---------|-------|-------|-------|------|-------|-------|-------|
| YGR024C |       | 9511  | 10042 | 0.95 | -0.08 | -0.19 | -0.69 |
| YMR150C | IMP1  | 3195  | 3374  | 0.95 | -0.08 | -0.19 | -0.69 |
| YDR352W |       | 11191 | 11819 | 0.95 | -0.08 | -0.19 | -0.70 |
| YPRO73C | LTP1  | 11688 | 12347 | 0.95 | -0.08 | -0.19 | -0.70 |
| YNR026C | SEC12 | 15597 | 16476 | 0.95 | -0.08 | -0.19 | -0.70 |
| YBR219C |       | 7094  | 7494  | 0.95 | -0.08 | -0.19 | -0.70 |
| YBR167C | POP7  | 17267 | 18242 | 0.95 | -0.08 | -0.19 | -0.70 |
| YPL100W |       | 751   | 793   | 0.95 | -0.08 | -0.19 | -0.70 |
| YLR123C |       | 2370  | 2505  | 0.95 | -0.08 | -0.19 | -0.70 |
| YNL265C | IST1  | 13195 | 13944 | 0.95 | -0.08 | -0.19 | -0.70 |
| YBR210W |       | 6462  | 6829  | 0.95 | -0.08 | -0.19 | -0.70 |
| YKR084C | HBS1  | 3501  | 3701  | 0.95 | -0.08 | -0.19 | -0.70 |
| YOR088W |       | 2023  | 2139  | 0.95 | -0.08 | -0.19 | -0.70 |
| YJL170C | ASG7  | 801   | 847   | 0.95 | -0.08 | -0.19 | -0.70 |
| YBR279W | PAF1  | 1415  | 1496  | 0.95 | -0.08 | -0.19 | -0.70 |
| YBR111C | YSA1  | 16193 | 17124 | 0.95 | -0.08 | -0.19 | -0.70 |
| YER078C |       | 3057  | 3233  | 0.95 | -0.08 | -0.19 | -0.70 |
| YOR228C |       | 1336  | 1413  | 0.95 | -0.08 | -0.19 | -0.70 |
| YLR105C | SEN2  | 11579 | 12252 | 0.95 | -0.08 | -0.19 | -0.71 |
| YDL066W | IDP1  | 12067 | 12770 | 0.94 | -0.08 | -0.19 | -0.71 |
| YLL056C |       | 1159  | 1227  | 0.94 | -0.08 | -0.19 | -0.71 |
| YJL188C |       | 39815 | 42142 | 0.94 | -0.08 | -0.19 | -0.71 |
| YDR274C |       | 2144  | 2269  | 0.94 | -0.08 | -0.19 | -0.71 |
| YPL070W |       | 5137  | 5439  | 0.94 | -0.08 | -0.19 | -0.71 |
| YPL212C | PUS1  | 13505 | 14302 | 0.94 | -0.08 | -0.20 | -0.71 |
| YER028C |       | 2733  | 2894  | 0.94 | -0.08 | -0.20 | -0.71 |
| YCL001W | RER1  | 3930  | 4164  | 0.94 | -0.08 | -0.20 | -0.71 |
| YCR077C | PAT1  | 16593 | 17582 | 0.94 | -0.08 | -0.20 | -0.71 |
| YHL021C |       | 12604 | 13358 | 0.94 | -0.08 | -0.20 | -0.71 |
| YPL113C |       | 548   | 581   | 0.94 | -0.08 | -0.20 | -0.71 |
| YNR024W |       | 15340 | 16258 | 0.94 | -0.08 | -0.20 | -0.71 |
| YBL100C |       | 3523  | 3734  | 0.94 | -0.08 | -0.20 | -0.71 |
| YJL149W |       | 2712  | 2875  | 0.94 | -0.08 | -0.20 | -0.71 |
| YKL060C | FBA1  | 44294 | 46963 | 0.94 | -0.08 | -0.20 | -0.72 |
| YDL046W |       | 24016 | 25464 | 0.94 | -0.08 | -0.20 | -0.72 |
| YCR083W | TRX3  | 4947  | 5246  | 0.94 | -0.08 | -0.20 | -0.72 |

|         |       |       |       |      |       |       |       |
|---------|-------|-------|-------|------|-------|-------|-------|
| YIR001C | SGN1  | 7377  | 7823  | 0.94 | -0.08 | -0.20 | -0.72 |
| YPL009C |       | 5479  | 5811  | 0.94 | -0.08 | -0.20 | -0.72 |
| YPR017C | DSS4  | 10026 | 10635 | 0.94 | -0.09 | -0.20 | -0.72 |
| YBR053C |       | 1959  | 2078  | 0.94 | -0.09 | -0.20 | -0.72 |
| YDR246W | TRS23 | 12976 | 13765 | 0.94 | -0.09 | -0.20 | -0.72 |
| YML071C |       | 6770  | 7182  | 0.94 | -0.09 | -0.20 | -0.72 |
| YDR163W |       | 6826  | 7242  | 0.94 | -0.09 | -0.20 | -0.72 |
| YNL101W |       | 9090  | 9644  | 0.94 | -0.09 | -0.20 | -0.72 |
| YAL009W | SPO7  | 1684  | 1787  | 0.94 | -0.09 | -0.20 | -0.72 |
| YPR202W |       | 2375  | 2520  | 0.94 | -0.09 | -0.20 | -0.72 |
| YDR061W |       | 3208  | 3405  | 0.94 | -0.09 | -0.20 | -0.72 |
| YDL096C |       | 6238  | 6620  | 0.94 | -0.09 | -0.20 | -0.72 |
| YKL111C |       | 6843  | 7265  | 0.94 | -0.09 | -0.20 | -0.72 |
| YDR231C | COX20 | 4570  | 4852  | 0.94 | -0.09 | -0.20 | -0.72 |
| YBL098W |       | 1286  | 1366  | 0.94 | -0.09 | -0.20 | -0.72 |
| YHL050C |       | 28360 | 30119 | 0.94 | -0.09 | -0.20 | -0.72 |
| YAR064W |       | 2083  | 2213  | 0.94 | -0.09 | -0.20 | -0.73 |
| YIL113W |       | 2014  | 2139  | 0.94 | -0.09 | -0.20 | -0.73 |
| YJR022W | LSM8  | 1710  | 1817  | 0.94 | -0.09 | -0.20 | -0.73 |
| YML077W | BET5  | 6668  | 7085  | 0.94 | -0.09 | -0.20 | -0.73 |
| YPL076W | GPI2  | 8109  | 8616  | 0.94 | -0.09 | -0.20 | -0.73 |
| YDR279W |       | 997   | 1059  | 0.94 | -0.09 | -0.20 | -0.73 |
| YOR344C | TYE7  | 4540  | 4825  | 0.94 | -0.09 | -0.20 | -0.73 |
| YGL219C |       | 4772  | 5072  | 0.94 | -0.09 | -0.20 | -0.73 |
| YDL207W | GLE1  | 12194 | 12961 | 0.94 | -0.09 | -0.20 | -0.73 |
| YML056C |       | 32454 | 34498 | 0.94 | -0.09 | -0.20 | -0.73 |
| YDR503C | LPP1  | 5858  | 6227  | 0.94 | -0.09 | -0.20 | -0.73 |
| YPR067W | ISA2  | 6440  | 6847  | 0.94 | -0.09 | -0.20 | -0.73 |
| YGR204W | ADE3  | 6180  | 6571  | 0.94 | -0.09 | -0.20 | -0.73 |
| YMR033W | ARP9  | 12509 | 13299 | 0.94 | -0.09 | -0.20 | -0.73 |
| YNL255C | GIS2  | 31135 | 33109 | 0.94 | -0.09 | -0.20 | -0.73 |
| YMR241W | YHM2  | 2040  | 2169  | 0.94 | -0.09 | -0.20 | -0.73 |
| YML014W |       | 18897 | 20096 | 0.94 | -0.09 | -0.20 | -0.73 |
| YOR107W |       | 3144  | 3344  | 0.94 | -0.09 | -0.20 | -0.73 |
| YDR073W | SNF11 | 6427  | 6836  | 0.94 | -0.09 | -0.20 | -0.73 |
| YJL017W |       | 1366  | 1453  | 0.94 | -0.09 | -0.20 | -0.73 |

|         |        |       |       |      |       |       |       |
|---------|--------|-------|-------|------|-------|-------|-------|
| YNL321W |        | 6437  | 6850  | 0.94 | -0.09 | -0.20 | -0.73 |
| YDL074C |        | 15240 | 16217 | 0.94 | -0.09 | -0.20 | -0.73 |
| YJL068C |        | 12250 | 13037 | 0.94 | -0.09 | -0.20 | -0.74 |
| YER093C |        | 4286  | 4561  | 0.94 | -0.09 | -0.20 | -0.74 |
| YJR159W | SOR1   | 1706  | 1816  | 0.94 | -0.09 | -0.20 | -0.74 |
| YLL042C | APG10  | 3403  | 3624  | 0.94 | -0.09 | -0.20 | -0.74 |
| YDR188W | CCT6   | 21289 | 22675 | 0.94 | -0.09 | -0.20 | -0.74 |
| YIR036C |        | 4313  | 4594  | 0.94 | -0.09 | -0.20 | -0.74 |
| YJL173C | RFA3   | 10950 | 11664 | 0.94 | -0.09 | -0.20 | -0.74 |
| YGR207C |        | 10388 | 11067 | 0.94 | -0.09 | -0.20 | -0.74 |
| YNL147W | LSM7   | 8204  | 8740  | 0.94 | -0.09 | -0.20 | -0.74 |
| YGL181W | GTS1   | 6254  | 6664  | 0.94 | -0.09 | -0.20 | -0.74 |
| YFR042W |        | 679   | 724   | 0.94 | -0.09 | -0.20 | -0.74 |
| YJL096W | MRPL49 | 21923 | 23365 | 0.94 | -0.09 | -0.20 | -0.74 |
| YGL165C |        | 6407  | 6829  | 0.94 | -0.09 | -0.20 | -0.74 |
| YDR532C |        | 5733  | 6111  | 0.94 | -0.09 | -0.20 | -0.74 |
| YNR032W | PPG1   | 11192 | 11932 | 0.94 | -0.09 | -0.20 | -0.74 |
| YDR046C | BAP3   | 1548  | 1650  | 0.94 | -0.09 | -0.20 | -0.75 |
| YPR113W | PIS1   | 21941 | 23396 | 0.94 | -0.09 | -0.21 | -0.75 |
| YKL193C | SDS22  | 5930  | 6324  | 0.94 | -0.09 | -0.21 | -0.75 |
| YER130C |        | 6472  | 6902  | 0.94 | -0.09 | -0.21 | -0.75 |
| YML088W |        | 3871  | 4129  | 0.94 | -0.09 | -0.21 | -0.75 |
| YHR154W | ESC4   | 7422  | 7916  | 0.94 | -0.09 | -0.21 | -0.75 |
| YNL275W |        | 7472  | 7972  | 0.94 | -0.09 | -0.21 | -0.75 |
| YJL159W | HSP150 | 4793  | 5114  | 0.94 | -0.09 | -0.21 | -0.75 |
| YGR168C |        | 17597 | 18778 | 0.94 | -0.09 | -0.21 | -0.75 |
| YDL241W |        | 4186  | 4467  | 0.94 | -0.09 | -0.21 | -0.75 |
| YGL050W |        | 4075  | 4349  | 0.94 | -0.09 | -0.21 | -0.75 |
| YPRO09W |        | 6087  | 6497  | 0.94 | -0.09 | -0.21 | -0.75 |
| YPL139C | UME1   | 4547  | 4853  | 0.94 | -0.09 | -0.21 | -0.75 |
| YER175C |        | 1908  | 2037  | 0.94 | -0.09 | -0.21 | -0.75 |
| YLR339C |        | 27937 | 29820 | 0.94 | -0.09 | -0.21 | -0.75 |
| YBR109C | CMD1   | 21564 | 23019 | 0.94 | -0.09 | -0.21 | -0.75 |
| YFL060C | SNO3   | 1619  | 1728  | 0.94 | -0.09 | -0.21 | -0.75 |
| YLR205C |        | 43098 | 46019 | 0.94 | -0.09 | -0.21 | -0.75 |
| YIL010W | DOT5   | 5606  | 5987  | 0.94 | -0.09 | -0.21 | -0.75 |

|           |        |       |       |      |       |       |       |
|-----------|--------|-------|-------|------|-------|-------|-------|
| YNL312W   | RFA2   | 8403  | 8974  | 0.94 | -0.09 | -0.21 | -0.75 |
| YMR300C   | ADE4   | 6072  | 6486  | 0.94 | -0.10 | -0.21 | -0.75 |
| YPL003W   | ULA1   | 3511  | 3750  | 0.94 | -0.10 | -0.21 | -0.75 |
| YFL057C   |        | 3001  | 3206  | 0.94 | -0.10 | -0.21 | -0.76 |
| YNL067W   | RPL9B  | 57651 | 61598 | 0.94 | -0.10 | -0.21 | -0.76 |
| YIL011W   |        | 10023 | 10710 | 0.94 | -0.10 | -0.21 | -0.76 |
| YMR294W-A |        | 11427 | 12211 | 0.94 | -0.10 | -0.21 | -0.76 |
| YJL211C   |        | 2671  | 2856  | 0.94 | -0.10 | -0.21 | -0.76 |
| YNL322C   | KRE1   | 5774  | 6174  | 0.94 | -0.10 | -0.21 | -0.76 |
| YPL052W   |        | 12457 | 13325 | 0.93 | -0.10 | -0.21 | -0.76 |
| YELO11W   | GLC3   | 4649  | 4974  | 0.93 | -0.10 | -0.21 | -0.76 |
| YKL151C   |        | 2211  | 2365  | 0.93 | -0.10 | -0.21 | -0.76 |
| YGR088W   | CTT1   | 3262  | 3490  | 0.93 | -0.10 | -0.21 | -0.76 |
| YOR137C   |        | 3229  | 3455  | 0.93 | -0.10 | -0.21 | -0.76 |
| YER092W   |        | 5862  | 6273  | 0.93 | -0.10 | -0.21 | -0.76 |
| YNL249C   | MPA43  | 6186  | 6621  | 0.93 | -0.10 | -0.21 | -0.77 |
| YPL032C   | SVL3   | 9352  | 10010 | 0.93 | -0.10 | -0.21 | -0.77 |
| YPL060W   |        | 4801  | 5140  | 0.93 | -0.10 | -0.21 | -0.77 |
| YOR326W   | MYO2   | 3523  | 3772  | 0.93 | -0.10 | -0.21 | -0.77 |
| YJL202C   |        | 5050  | 5407  | 0.93 | -0.10 | -0.21 | -0.77 |
| YFL010C   |        | 19336 | 20704 | 0.93 | -0.10 | -0.21 | -0.77 |
| YMR265C   |        | 1211  | 1297  | 0.93 | -0.10 | -0.21 | -0.77 |
| YMR170C   | ALD2   | 4137  | 4430  | 0.93 | -0.10 | -0.21 | -0.77 |
| YDR069C   | DOA4   | 1770  | 1896  | 0.93 | -0.10 | -0.21 | -0.77 |
| YGL031C   | RPL24A | 31564 | 33805 | 0.93 | -0.10 | -0.21 | -0.77 |
| YER093C-A |        | 2924  | 3132  | 0.93 | -0.10 | -0.21 | -0.77 |
| YJL115W   | ASF1   | 7259  | 7776  | 0.93 | -0.10 | -0.21 | -0.77 |
| YELO74W   |        | 1289  | 1381  | 0.93 | -0.10 | -0.21 | -0.77 |
| YBR207W   | FTH1   | 19981 | 21405 | 0.93 | -0.10 | -0.21 | -0.77 |
| YNL072W   | RNH35  | 7930  | 8498  | 0.93 | -0.10 | -0.21 | -0.77 |
| YDR317W   |        | 802   | 860   | 0.93 | -0.10 | -0.21 | -0.77 |
| YMR306C-A |        | 1593  | 1707  | 0.93 | -0.10 | -0.21 | -0.77 |
| YLR466W   | YRF1-4 | 4172  | 4472  | 0.93 | -0.10 | -0.21 | -0.77 |
| YKL067W   | YNK1   | 8391  | 8994  | 0.93 | -0.10 | -0.21 | -0.77 |
| YIL118W   | RHO3   | 14923 | 15997 | 0.93 | -0.10 | -0.21 | -0.77 |
| YIL018W   | RPL2B  | 49240 | 52786 | 0.93 | -0.10 | -0.21 | -0.77 |

|           |        |       |       |      |       |       |       |
|-----------|--------|-------|-------|------|-------|-------|-------|
| YNR043W   | MVD1   | 17753 | 19033 | 0.93 | -0.10 | -0.21 | -0.77 |
| YLR137W   |        | 6279  | 6732  | 0.93 | -0.10 | -0.21 | -0.77 |
| YER076C   |        | 4558  | 4888  | 0.93 | -0.10 | -0.21 | -0.78 |
| YOR057W   | SGT1   | 4573  | 4906  | 0.93 | -0.10 | -0.21 | -0.78 |
| YDR031W   |        | 2220  | 2382  | 0.93 | -0.10 | -0.21 | -0.78 |
| YDR454C   | GUK1   | 12447 | 13357 | 0.93 | -0.10 | -0.21 | -0.78 |
| YGR038W   | ORM1   | 6469  | 6942  | 0.93 | -0.10 | -0.21 | -0.78 |
| YLR100W   |        | 11934 | 12809 | 0.93 | -0.10 | -0.21 | -0.78 |
| YNL310C   |        | 4619  | 4958  | 0.93 | -0.10 | -0.21 | -0.78 |
| YDR008C   |        | 3636  | 3904  | 0.93 | -0.10 | -0.21 | -0.78 |
| YML012W   | ERV25  | 13047 | 14009 | 0.93 | -0.10 | -0.22 | -0.78 |
| YER002W   |        | 24725 | 26548 | 0.93 | -0.10 | -0.22 | -0.78 |
| YNR019W   | ARE2   | 10708 | 11501 | 0.93 | -0.10 | -0.22 | -0.78 |
| YDL002C   | NHP10  | 13051 | 14019 | 0.93 | -0.10 | -0.22 | -0.78 |
| YKR015C   |        | 566   | 608   | 0.93 | -0.10 | -0.22 | -0.78 |
| YPL215W   | CBP3   | 9069  | 9743  | 0.93 | -0.10 | -0.22 | -0.78 |
| YLR133W   | CKI1   | 9347  | 10042 | 0.93 | -0.10 | -0.22 | -0.79 |
| YFL035C   |        | 3902  | 4193  | 0.93 | -0.10 | -0.22 | -0.79 |
| YGR058W   |        | 3814  | 4100  | 0.93 | -0.10 | -0.22 | -0.79 |
| YBR223C   |        | 7141  | 7678  | 0.93 | -0.10 | -0.22 | -0.79 |
| YER163C   |        | 7188  | 7729  | 0.93 | -0.10 | -0.22 | -0.79 |
| YPL015C   | HST2   | 6947  | 7472  | 0.93 | -0.11 | -0.22 | -0.79 |
| YBR090C-A |        | 18919 | 20348 | 0.93 | -0.11 | -0.22 | -0.79 |
| YFL017C   | GNA1   | 5844  | 6286  | 0.93 | -0.11 | -0.22 | -0.79 |
| YNL185C   | MRPL19 | 8145  | 8764  | 0.93 | -0.11 | -0.22 | -0.79 |
| YIL049W   | DFG10  | 3933  | 4232  | 0.93 | -0.11 | -0.22 | -0.79 |
| YLR172C   | DPH5   | 1001  | 1077  | 0.93 | -0.11 | -0.22 | -0.79 |
| YHR164C   | DNA2   | 8824  | 9498  | 0.93 | -0.11 | -0.22 | -0.79 |
| YBL022C   | PIM1   | 13441 | 14468 | 0.93 | -0.11 | -0.22 | -0.79 |
| YNL026W   |        | 22586 | 24314 | 0.93 | -0.11 | -0.22 | -0.80 |
| YNR014W   |        | 3597  | 3872  | 0.93 | -0.11 | -0.22 | -0.80 |
| YML132W   | COS3   | 12144 | 13075 | 0.93 | -0.11 | -0.22 | -0.80 |
| YPL058C   | PDR12  | 805   | 867   | 0.93 | -0.11 | -0.22 | -0.80 |
| YPL214C   | THI6   | 7675  | 8264  | 0.93 | -0.11 | -0.22 | -0.80 |
| YHR218W   |        | 18380 | 19796 | 0.93 | -0.11 | -0.22 | -0.80 |
| YGR042W   |        | 6246  | 6731  | 0.93 | -0.11 | -0.22 | -0.80 |



|           |           |       |       |      |       |       |       |
|-----------|-----------|-------|-------|------|-------|-------|-------|
| YGL103W   | RPL28     | 60715 | 65433 | 0.93 | -0.11 | -0.22 | -0.80 |
| YOR035C   | SHE4      | 2171  | 2340  | 0.93 | -0.11 | -0.22 | -0.80 |
| YBR205W   | KTR3      | 22310 | 24049 | 0.93 | -0.11 | -0.22 | -0.80 |
| YKRO66C   | CCP1      | 9501  | 10242 | 0.93 | -0.11 | -0.22 | -0.80 |
| YDR308C   | SRB7      | 12108 | 13053 | 0.93 | -0.11 | -0.22 | -0.80 |
| YDL123W   |           | 3777  | 4073  | 0.93 | -0.11 | -0.22 | -0.80 |
| YOR352W   |           | 1997  | 2154  | 0.93 | -0.11 | -0.22 | -0.80 |
| YAL061W   |           | 4034  | 4351  | 0.93 | -0.11 | -0.22 | -0.81 |
| YIRO25W   |           | 2625  | 2831  | 0.93 | -0.11 | -0.22 | -0.81 |
| YOR149C   | SMP3      | 8336  | 8992  | 0.93 | -0.11 | -0.22 | -0.81 |
| YCL066W   | HMLALPHA1 | 9482  | 10228 | 0.93 | -0.11 | -0.22 | -0.81 |
| YHR214W-A |           | 3018  | 3256  | 0.93 | -0.11 | -0.22 | -0.81 |
| YMR004W   | MVP1      | 1975  | 2131  | 0.93 | -0.11 | -0.22 | -0.81 |
| YLR374C   |           | 2364  | 2550  | 0.93 | -0.11 | -0.22 | -0.81 |
| YDR077W   | SED1      | 11165 | 12046 | 0.93 | -0.11 | -0.22 | -0.81 |
| YML074C   | NPI46     | 6312  | 6810  | 0.93 | -0.11 | -0.22 | -0.81 |
| YGL154C   | LYS5      | 3047  | 3288  | 0.93 | -0.11 | -0.22 | -0.81 |
| YIL155C   | GUT2      | 3863  | 4169  | 0.93 | -0.11 | -0.22 | -0.81 |
| YNL333W   | SNZ2      | 8324  | 8983  | 0.93 | -0.11 | -0.22 | -0.81 |
| YNL331C   | AAD14     | 13237 | 14286 | 0.93 | -0.11 | -0.22 | -0.81 |
| YDL145C   | COP1      | 10470 | 11300 | 0.93 | -0.11 | -0.22 | -0.81 |
| YCL032W   | STE50     | 16571 | 17887 | 0.93 | -0.11 | -0.22 | -0.81 |
| YOR175C   |           | 22314 | 24088 | 0.93 | -0.11 | -0.22 | -0.81 |
| YFRO20W   |           | 3273  | 3533  | 0.93 | -0.11 | -0.22 | -0.81 |
| YPR129W   | SCD6      | 16884 | 18231 | 0.93 | -0.11 | -0.22 | -0.81 |
| YGL017W   | ATE1      | 9005  | 9724  | 0.93 | -0.11 | -0.22 | -0.81 |
| YNL089C   |           | 9539  | 10302 | 0.93 | -0.11 | -0.22 | -0.81 |
| YOR197W   |           | 30683 | 33137 | 0.93 | -0.11 | -0.22 | -0.81 |
| YHR053C   | CUP1-1    | 10272 | 11095 | 0.93 | -0.11 | -0.22 | -0.81 |
| YBR018C   | GAL7      | 593   | 641   | 0.93 | -0.11 | -0.22 | -0.81 |
| YJR015W   |           | 3702  | 4001  | 0.93 | -0.11 | -0.22 | -0.82 |
| YGR208W   | SER2      | 28429 | 30726 | 0.93 | -0.11 | -0.22 | -0.82 |
| YKRO76W   | ECM4      | 761   | 823   | 0.93 | -0.11 | -0.22 | -0.82 |
| YDR041W   |           | 15351 | 16593 | 0.93 | -0.11 | -0.22 | -0.82 |
| YGR158C   | MTR3      | 14787 | 15985 | 0.93 | -0.11 | -0.22 | -0.82 |
| YBL041W   | PRE7      | 20964 | 22669 | 0.92 | -0.11 | -0.23 | -0.82 |

|         |        |       |       |      |       |       |       |
|---------|--------|-------|-------|------|-------|-------|-------|
| YOR231W | MKK1   | 16126 | 17441 | 0.92 | -0.11 | -0.23 | -0.82 |
| YOR125C | CAT5   | 10718 | 11592 | 0.92 | -0.11 | -0.23 | -0.82 |
| YIRO24C | GIF1   | 6824  | 7382  | 0.92 | -0.11 | -0.23 | -0.82 |
| YGR275W | RTT102 | 5185  | 5609  | 0.92 | -0.11 | -0.23 | -0.82 |
| YLR151C |        | 3650  | 3949  | 0.92 | -0.11 | -0.23 | -0.82 |
| YNR074C |        | 730   | 790   | 0.92 | -0.11 | -0.23 | -0.82 |
| YIR007W |        | 1394  | 1509  | 0.92 | -0.11 | -0.23 | -0.82 |
| YDL200C | MGT1   | 4100  | 4437  | 0.92 | -0.11 | -0.23 | -0.82 |
| YFR027W | ECO1   | 8984  | 9727  | 0.92 | -0.11 | -0.23 | -0.83 |
| YNL309W | STB1   | 7001  | 7580  | 0.92 | -0.11 | -0.23 | -0.83 |
| YDR538W | PAD1   | 4708  | 5098  | 0.92 | -0.11 | -0.23 | -0.83 |
| YLR145W |        | 10720 | 11609 | 0.92 | -0.11 | -0.23 | -0.83 |
| YLR006C | SSK1   | 6161  | 6674  | 0.92 | -0.12 | -0.23 | -0.83 |
| YDL092W | SRP14  | 15698 | 17005 | 0.92 | -0.12 | -0.23 | -0.83 |
| YCR062W |        | 859   | 930   | 0.92 | -0.12 | -0.23 | -0.83 |
| YMR092C | AIP1   | 10364 | 11227 | 0.92 | -0.12 | -0.23 | -0.83 |
| YHR130C |        | 4813  | 5215  | 0.92 | -0.12 | -0.23 | -0.83 |
| YHR086W | NAM8   | 1270  | 1376  | 0.92 | -0.12 | -0.23 | -0.83 |
| YGR266W |        | 11241 | 12180 | 0.92 | -0.12 | -0.23 | -0.83 |
| YOR369C | RPS12  | 41308 | 44758 | 0.92 | -0.12 | -0.23 | -0.83 |
| YMR295C |        | 28737 | 31140 | 0.92 | -0.12 | -0.23 | -0.83 |
| YGR237C |        | 2201  | 2386  | 0.92 | -0.12 | -0.23 | -0.83 |
| YLR300W | EXG1   | 39664 | 42999 | 0.92 | -0.12 | -0.23 | -0.83 |
| YGR102C |        | 10882 | 11802 | 0.92 | -0.12 | -0.23 | -0.83 |
| YNL104C | LEU4   | 24454 | 26522 | 0.92 | -0.12 | -0.23 | -0.83 |
| YML055W | SPC2   | 8086  | 8770  | 0.92 | -0.12 | -0.23 | -0.83 |
| YMR110C |        | 8697  | 9433  | 0.92 | -0.12 | -0.23 | -0.83 |
| YBL046W |        | 17414 | 18889 | 0.92 | -0.12 | -0.23 | -0.84 |
| YOR358W | HAP5   | 3122  | 3387  | 0.92 | -0.12 | -0.23 | -0.84 |
| YOL039W | RPP2A  | 37725 | 40924 | 0.92 | -0.12 | -0.23 | -0.84 |
| YPL059W | GRX5   | 8658  | 9392  | 0.92 | -0.12 | -0.23 | -0.84 |
| YGR074W | SMD1   | 9866  | 10705 | 0.92 | -0.12 | -0.23 | -0.84 |
| YFL066C |        | 25937 | 28146 | 0.92 | -0.12 | -0.23 | -0.84 |
| YER071C |        | 2703  | 2933  | 0.92 | -0.12 | -0.23 | -0.84 |
| YBR026C | MRF1'  | 3338  | 3623  | 0.92 | -0.12 | -0.23 | -0.84 |
| YGL002W | ERP6   | 3474  | 3770  | 0.92 | -0.12 | -0.23 | -0.84 |

|         |       |       |       |      |       |       |       |
|---------|-------|-------|-------|------|-------|-------|-------|
| YML127W |       | 18673 | 20273 | 0.92 | -0.12 | -0.23 | -0.84 |
| YLR267W | BOP2  | 1902  | 2065  | 0.92 | -0.12 | -0.23 | -0.84 |
| YKL199C | YKT9  | 2260  | 2454  | 0.92 | -0.12 | -0.23 | -0.84 |
| YNL099C |       | 5224  | 5673  | 0.92 | -0.12 | -0.23 | -0.84 |
| YOL133W | HRT1  | 10257 | 11140 | 0.92 | -0.12 | -0.23 | -0.84 |
| YKL167C | MRP49 | 17196 | 18677 | 0.92 | -0.12 | -0.23 | -0.84 |
| YLR189C | UGT51 | 21280 | 23114 | 0.92 | -0.12 | -0.23 | -0.84 |
| YNL171C |       | 1688  | 1834  | 0.92 | -0.12 | -0.23 | -0.84 |
| YPL014W |       | 2772  | 3012  | 0.92 | -0.12 | -0.23 | -0.84 |
| YHR192W |       | 420   | 456   | 0.92 | -0.12 | -0.23 | -0.84 |
| YNL149C |       | 12254 | 13319 | 0.92 | -0.12 | -0.23 | -0.85 |
| YDR468C | TLG1  | 10421 | 11327 | 0.92 | -0.12 | -0.23 | -0.85 |
| YML098W | TAF19 | 11929 | 12968 | 0.92 | -0.12 | -0.23 | -0.85 |
| YLR252W |       | 1534  | 1668  | 0.92 | -0.12 | -0.23 | -0.85 |
| YJR046W | TAH11 | 3623  | 3941  | 0.92 | -0.12 | -0.23 | -0.85 |
| YCL005W |       | 12729 | 13848 | 0.92 | -0.12 | -0.23 | -0.85 |
| YILO28W |       | 2625  | 2856  | 0.92 | -0.12 | -0.23 | -0.85 |
| YCR079W |       | 3079  | 3350  | 0.92 | -0.12 | -0.23 | -0.85 |
| YPR103W | PRE2  | 11501 | 12515 | 0.92 | -0.12 | -0.23 | -0.85 |
| YDR284C | DPP1  | 8936  | 9725  | 0.92 | -0.12 | -0.23 | -0.85 |
| YILO24C |       | 3571  | 3886  | 0.92 | -0.12 | -0.23 | -0.85 |
| YLR281C |       | 1513  | 1647  | 0.92 | -0.12 | -0.23 | -0.85 |
| YMR197C | VTI1  | 8774  | 9549  | 0.92 | -0.12 | -0.23 | -0.85 |
| YKL002W |       | 12755 | 13889 | 0.92 | -0.12 | -0.24 | -0.86 |
| YNR060W | FRE4  | 2828  | 3080  | 0.92 | -0.12 | -0.24 | -0.86 |
| YIR030C | DCG1  | 8086  | 8806  | 0.92 | -0.12 | -0.24 | -0.86 |
| YML125C |       | 37933 | 41312 | 0.92 | -0.12 | -0.24 | -0.86 |
| YHR194W |       | 7427  | 8089  | 0.92 | -0.12 | -0.24 | -0.86 |
| YDR238C | SEC26 | 9837  | 10714 | 0.92 | -0.12 | -0.24 | -0.86 |
| YNL336W | COS1  | 9896  | 10779 | 0.92 | -0.12 | -0.24 | -0.86 |
| YJR024C |       | 12141 | 13227 | 0.92 | -0.12 | -0.24 | -0.86 |
| YOR357C | GRD19 | 12152 | 13239 | 0.92 | -0.12 | -0.24 | -0.86 |
| YOR208W | PTP2  | 2193  | 2389  | 0.92 | -0.12 | -0.24 | -0.86 |
| YEL052W | AFG1  | 4396  | 4790  | 0.92 | -0.12 | -0.24 | -0.86 |
| YAL044C | GCV3  | 11579 | 12616 | 0.92 | -0.12 | -0.24 | -0.86 |
| YPR133C |       | 13215 | 14400 | 0.92 | -0.12 | -0.24 | -0.86 |

|         |       |       |       |      |       |       |       |
|---------|-------|-------|-------|------|-------|-------|-------|
| YIL134W | FLX1  | 2437  | 2656  | 0.92 | -0.12 | -0.24 | -0.86 |
| YGL141W |       | 734   | 800   | 0.92 | -0.12 | -0.24 | -0.86 |
| YLL064C |       | 2252  | 2454  | 0.92 | -0.12 | -0.24 | -0.86 |
| YGR218W | CRM1  | 12416 | 13535 | 0.92 | -0.12 | -0.24 | -0.86 |
| YJR047C | ANB1  | 5576  | 6079  | 0.92 | -0.12 | -0.24 | -0.86 |
| YIRO35C |       | 8932  | 9738  | 0.92 | -0.12 | -0.24 | -0.86 |
| YOR261C | RPN8  | 10288 | 11218 | 0.92 | -0.12 | -0.24 | -0.86 |
| YIRO31C | DAL7  | 4239  | 4623  | 0.92 | -0.13 | -0.24 | -0.86 |
| YKL201C | MNN4  | 1904  | 2077  | 0.92 | -0.13 | -0.24 | -0.86 |
| YER065C | ICL1  | 7254  | 7912  | 0.92 | -0.13 | -0.24 | -0.86 |
| YDR528W |       | 7506  | 8188  | 0.92 | -0.13 | -0.24 | -0.86 |
| YDR157W |       | 4581  | 4997  | 0.92 | -0.13 | -0.24 | -0.86 |
| YJR105W |       | 9256  | 10099 | 0.92 | -0.13 | -0.24 | -0.87 |
| YNL129W |       | 5155  | 5625  | 0.92 | -0.13 | -0.24 | -0.87 |
| YBR230C |       | 4749  | 5182  | 0.92 | -0.13 | -0.24 | -0.87 |
| YGL104C |       | 1228  | 1340  | 0.92 | -0.13 | -0.24 | -0.87 |
| YPR179C |       | 3275  | 3576  | 0.92 | -0.13 | -0.24 | -0.87 |
| YBR196C | PGI1  | 28242 | 30842 | 0.92 | -0.13 | -0.24 | -0.87 |
| YDR387C |       | 8201  | 8956  | 0.92 | -0.13 | -0.24 | -0.87 |
| YDL130W | RPP1B | 42458 | 46373 | 0.92 | -0.13 | -0.24 | -0.87 |
| YOR005C | DNL4  | 901   | 984   | 0.92 | -0.13 | -0.24 | -0.87 |
| YLR111W |       | 834   | 911   | 0.92 | -0.13 | -0.24 | -0.87 |
| YIRO32C | DAL3  | 11578 | 12648 | 0.92 | -0.13 | -0.24 | -0.87 |
| YDL027C |       | 1561  | 1706  | 0.92 | -0.13 | -0.24 | -0.87 |
| YDR426C |       | 1802  | 1969  | 0.92 | -0.13 | -0.24 | -0.87 |
| YKR039W | GAP1  | 15431 | 16864 | 0.92 | -0.13 | -0.24 | -0.87 |
| YJL151C |       | 13228 | 14458 | 0.91 | -0.13 | -0.24 | -0.88 |
| YBR211C | AME1  | 10282 | 11239 | 0.91 | -0.13 | -0.24 | -0.88 |
| YOR271C |       | 8746  | 9562  | 0.91 | -0.13 | -0.24 | -0.88 |
| YILO60W |       | 7140  | 7812  | 0.91 | -0.13 | -0.24 | -0.88 |
| YLR021W |       | 10087 | 11037 | 0.91 | -0.13 | -0.24 | -0.88 |
| YIL175W |       | 5802  | 6348  | 0.91 | -0.13 | -0.24 | -0.88 |
| YMR303C | ADH2  | 38550 | 42208 | 0.91 | -0.13 | -0.24 | -0.88 |
| YNL259C | ATX1  | 12446 | 13627 | 0.91 | -0.13 | -0.24 | -0.88 |
| YOR368W | RAD17 | 2421  | 2651  | 0.91 | -0.13 | -0.24 | -0.88 |
| YGR124W | ASN2  | 31449 | 34439 | 0.91 | -0.13 | -0.24 | -0.89 |

|           |        |       |       |      |       |       |       |
|-----------|--------|-------|-------|------|-------|-------|-------|
| YGR064W   |        | 5303  | 5807  | 0.91 | -0.13 | -0.24 | -0.89 |
| YNL219C   | ALG9   | 11779 | 12900 | 0.91 | -0.13 | -0.24 | -0.89 |
| YDL159W   | STE7   | 8302  | 9094  | 0.91 | -0.13 | -0.24 | -0.89 |
| YBR035C   | PDX3   | 11867 | 13000 | 0.91 | -0.13 | -0.24 | -0.89 |
| YLR169W   |        | 1774  | 1944  | 0.91 | -0.13 | -0.24 | -0.89 |
| YJL210W   | PEX2   | 2746  | 3009  | 0.91 | -0.13 | -0.24 | -0.89 |
| YDR007W   | TRP1   | 5415  | 5934  | 0.91 | -0.13 | -0.24 | -0.89 |
| YJL190C   | RPS22A | 45956 | 50374 | 0.91 | -0.13 | -0.24 | -0.89 |
| YGR078C   | PAC10  | 9329  | 10232 | 0.91 | -0.13 | -0.25 | -0.89 |
| YMR222C   |        | 2652  | 2909  | 0.91 | -0.13 | -0.25 | -0.89 |
| YER036C   |        | 24956 | 27380 | 0.91 | -0.13 | -0.25 | -0.90 |
| YPL050C   | MNN9   | 31128 | 34157 | 0.91 | -0.13 | -0.25 | -0.90 |
| YER112W   | LSM4   | 10793 | 11844 | 0.91 | -0.13 | -0.25 | -0.90 |
| YCR025C   |        | 871   | 956   | 0.91 | -0.13 | -0.25 | -0.90 |
| YKR008W   | RSC4   | 3352  | 3680  | 0.91 | -0.13 | -0.25 | -0.90 |
| YBL072C   | RPS8A  | 52318 | 57453 | 0.91 | -0.14 | -0.25 | -0.90 |
| YKL051W   |        | 6685  | 7341  | 0.91 | -0.14 | -0.25 | -0.90 |
| YML087C   |        | 3125  | 3432  | 0.91 | -0.14 | -0.25 | -0.90 |
| YEL073C   |        | 3103  | 3408  | 0.91 | -0.14 | -0.25 | -0.90 |
| YLR185W   | RPL37A | 6551  | 7195  | 0.91 | -0.14 | -0.25 | -0.90 |
| YNL243W   | SLA2   | 12912 | 14187 | 0.91 | -0.14 | -0.25 | -0.90 |
| YDR115W   |        | 8997  | 9887  | 0.91 | -0.14 | -0.25 | -0.90 |
| YDL142C   | CRD1   | 3595  | 3952  | 0.91 | -0.14 | -0.25 | -0.90 |
| YJL165C   | HAL5   | 674   | 741   | 0.91 | -0.14 | -0.25 | -0.91 |
| YNR052C   | POP2   | 16197 | 17809 | 0.91 | -0.14 | -0.25 | -0.91 |
| YGR242W   |        | 6518  | 7167  | 0.91 | -0.14 | -0.25 | -0.91 |
| YLR351C   | NIT3   | 13709 | 15074 | 0.91 | -0.14 | -0.25 | -0.91 |
| YLR101C   |        | 17735 | 19508 | 0.91 | -0.14 | -0.25 | -0.91 |
| YDR414C   | ERD1   | 3154  | 3471  | 0.91 | -0.14 | -0.25 | -0.91 |
| YGL198W   |        | 14782 | 16269 | 0.91 | -0.14 | -0.25 | -0.91 |
| YIL015C-A |        | 1584  | 1744  | 0.91 | -0.14 | -0.25 | -0.91 |
| YNL038W   |        | 18735 | 20624 | 0.91 | -0.14 | -0.25 | -0.91 |
| YLR203C   | MSS51  | 23599 | 25979 | 0.91 | -0.14 | -0.25 | -0.91 |
| YDR117C   |        | 4830  | 5317  | 0.91 | -0.14 | -0.25 | -0.91 |
| YGR236C   |        | 823   | 906   | 0.91 | -0.14 | -0.25 | -0.91 |
| YDR047W   | HEM12  | 9396  | 10344 | 0.91 | -0.14 | -0.25 | -0.91 |

|         |        |       |       |      |       |       |       |
|---------|--------|-------|-------|------|-------|-------|-------|
| YDR428C |        | 5416  | 5963  | 0.91 | -0.14 | -0.25 | -0.91 |
| YER013W | PRP22  | 2254  | 2482  | 0.91 | -0.14 | -0.25 | -0.91 |
| YGL151W | NUT1   | 8849  | 9744  | 0.91 | -0.14 | -0.25 | -0.91 |
| YHR063C |        | 2351  | 2590  | 0.91 | -0.14 | -0.25 | -0.92 |
| YFL038C | YPT1   | 24772 | 27287 | 0.91 | -0.14 | -0.25 | -0.92 |
| YIR011C | STS1   | 12551 | 13825 | 0.91 | -0.14 | -0.25 | -0.92 |
| YKR006C | MRPL13 | 15050 | 16578 | 0.91 | -0.14 | -0.25 | -0.92 |
| YPR075C | OPY2   | 8059  | 8883  | 0.91 | -0.14 | -0.25 | -0.92 |
| YIL076W | SEC28  | 32320 | 35651 | 0.91 | -0.14 | -0.25 | -0.92 |
| YER185W |        | 756   | 834   | 0.91 | -0.14 | -0.25 | -0.92 |
| YDR348C |        | 1748  | 1929  | 0.91 | -0.14 | -0.25 | -0.92 |
| YMR223W | UBP8   | 5772  | 6368  | 0.91 | -0.14 | -0.25 | -0.92 |
| YOR281C |        | 409   | 451   | 0.91 | -0.14 | -0.25 | -0.92 |
| YDR105C |        | 8807  | 9720  | 0.91 | -0.14 | -0.25 | -0.93 |
| YKL066W |        | 3550  | 3919  | 0.91 | -0.14 | -0.25 | -0.93 |
| YFL039C | ACT1   | 25284 | 27911 | 0.91 | -0.14 | -0.26 | -0.93 |
| YJL101C | GSH1   | 6927  | 7647  | 0.91 | -0.14 | -0.26 | -0.93 |
| YDR103W | STE5   | 4053  | 4475  | 0.91 | -0.14 | -0.26 | -0.93 |
| YDL168W | SFA1   | 8969  | 9903  | 0.91 | -0.14 | -0.26 | -0.93 |
| YKR016W |        | 8416  | 9292  | 0.91 | -0.14 | -0.26 | -0.93 |
| YOR277C |        | 13750 | 15184 | 0.91 | -0.14 | -0.26 | -0.93 |
| YKR014C | YPT52  | 4834  | 5341  | 0.91 | -0.14 | -0.26 | -0.93 |
| YDL004W | ATP16  | 13940 | 15405 | 0.90 | -0.14 | -0.26 | -0.93 |
| YKL217W | JEN1   | 565   | 624   | 0.90 | -0.14 | -0.26 | -0.93 |
| YAL014C |        | 10502 | 11607 | 0.90 | -0.14 | -0.26 | -0.93 |
| YLR108C |        | 4731  | 5231  | 0.90 | -0.14 | -0.26 | -0.94 |
| YJL166W | QCR8   | 27861 | 30810 | 0.90 | -0.15 | -0.26 | -0.94 |
| YIL053W | RHR2   | 29563 | 32693 | 0.90 | -0.15 | -0.26 | -0.94 |
| YIR016W |        | 4126  | 4563  | 0.90 | -0.15 | -0.26 | -0.94 |
| YDR013W |        | 4027  | 4455  | 0.90 | -0.15 | -0.26 | -0.94 |
| YNL211C |        | 3286  | 3636  | 0.90 | -0.15 | -0.26 | -0.94 |
| YLR285W |        | 12589 | 13929 | 0.90 | -0.15 | -0.26 | -0.94 |
| YIL022W | TIM44  | 15904 | 17598 | 0.90 | -0.15 | -0.26 | -0.94 |
| YDL078C | MDH3   | 16148 | 17878 | 0.90 | -0.15 | -0.26 | -0.94 |
| YIL170W | HXT12  | 2701  | 2991  | 0.90 | -0.15 | -0.26 | -0.94 |
| YOL058W | ARG1   | 6930  | 7673  | 0.90 | -0.15 | -0.26 | -0.94 |

|         |        |       |       |      |       |       |       |
|---------|--------|-------|-------|------|-------|-------|-------|
| YER141W | COX15  | 18484 | 20467 | 0.90 | -0.15 | -0.26 | -0.94 |
| YHR152W | SPO12  | 17083 | 18917 | 0.90 | -0.15 | -0.26 | -0.94 |
| YJL121C | RPE1   | 8332  | 9227  | 0.90 | -0.15 | -0.26 | -0.94 |
| YHR114W |        | 36975 | 40949 | 0.90 | -0.15 | -0.26 | -0.94 |
| YGR178C | PBP1   | 20705 | 22931 | 0.90 | -0.15 | -0.26 | -0.94 |
| YDL198C | YHM1   | 15177 | 16810 | 0.90 | -0.15 | -0.26 | -0.94 |
| YFL028C | CAF16  | 9820  | 10877 | 0.90 | -0.15 | -0.26 | -0.95 |
| YJR057W | CDC8   | 6369  | 7056  | 0.90 | -0.15 | -0.26 | -0.95 |
| YGR062C | COX18  | 3419  | 3788  | 0.90 | -0.15 | -0.26 | -0.95 |
| YGR192C | TDH3   | 59047 | 65427 | 0.90 | -0.15 | -0.26 | -0.95 |
| YNL173C | MDG1   | 12448 | 13798 | 0.90 | -0.15 | -0.26 | -0.95 |
| YLR195C | NMT1   | 4915  | 5451  | 0.90 | -0.15 | -0.26 | -0.95 |
| YDL181W | INH1   | 25554 | 28362 | 0.90 | -0.15 | -0.26 | -0.96 |
| YNL012W | SPO1   | 5141  | 5707  | 0.90 | -0.15 | -0.26 | -0.96 |
| YIR038C | GTT1   | 9955  | 11051 | 0.90 | -0.15 | -0.26 | -0.96 |
| YPR101W | SNT309 | 7359  | 8170  | 0.90 | -0.15 | -0.26 | -0.96 |
| YKL133C |        | 2275  | 2526  | 0.90 | -0.15 | -0.26 | -0.96 |
| YPL066W |        | 13995 | 15544 | 0.90 | -0.15 | -0.26 | -0.96 |
| YLR136C | TIS11  | 3032  | 3368  | 0.90 | -0.15 | -0.26 | -0.96 |
| YGR211W | ZPR1   | 13944 | 15494 | 0.90 | -0.15 | -0.26 | -0.96 |
| YBR261C |        | 12197 | 13553 | 0.90 | -0.15 | -0.26 | -0.96 |
| YML112W | CTK3   | 15439 | 17158 | 0.90 | -0.15 | -0.26 | -0.96 |
| YGL027C | CWH41  | 8146  | 9055  | 0.90 | -0.15 | -0.26 | -0.96 |
| YHL046C |        | 1528  | 1699  | 0.90 | -0.15 | -0.27 | -0.96 |
| YJR039W |        | 347   | 386   | 0.90 | -0.15 | -0.27 | -0.96 |
| YLL014W |        | 9170  | 10197 | 0.90 | -0.15 | -0.27 | -0.97 |
| YFR051C | RET2   | 9077  | 10094 | 0.90 | -0.15 | -0.27 | -0.97 |
| YDR511W |        | 3921  | 4360  | 0.90 | -0.15 | -0.27 | -0.97 |
| YKRO48C | NAP1   | 4679  | 5204  | 0.90 | -0.15 | -0.27 | -0.97 |
| YDR254W | CHL4   | 6262  | 6965  | 0.90 | -0.15 | -0.27 | -0.97 |
| YFL048C | EMP47  | 8863  | 9857  | 0.90 | -0.15 | -0.27 | -0.97 |
| YJL078C | PRY3   | 21300 | 23693 | 0.90 | -0.15 | -0.27 | -0.97 |
| YNL200C |        | 7714  | 8583  | 0.90 | -0.15 | -0.27 | -0.97 |
| YGL023C | PIB2   | 7415  | 8250  | 0.90 | -0.15 | -0.27 | -0.97 |
| YJL172W | CPS1   | 4839  | 5386  | 0.90 | -0.15 | -0.27 | -0.97 |
| YDL114W |        | 446   | 496   | 0.90 | -0.15 | -0.27 | -0.97 |

|           |       |       |       |      |       |       |       |
|-----------|-------|-------|-------|------|-------|-------|-------|
| YKL155C   |       | 3249  | 3618  | 0.90 | -0.15 | -0.27 | -0.97 |
| YML110C   | COQ5  | 27290 | 30396 | 0.90 | -0.16 | -0.27 | -0.97 |
| YPR098C   |       | 5865  | 6534  | 0.90 | -0.16 | -0.27 | -0.98 |
| YOR015W   |       | 2213  | 2466  | 0.90 | -0.16 | -0.27 | -0.98 |
| YDL068W   |       | 2124  | 2367  | 0.90 | -0.16 | -0.27 | -0.98 |
| YNR037C   |       | 5422  | 6041  | 0.90 | -0.16 | -0.27 | -0.98 |
| YER145C   | FTR1  | 18651 | 20781 | 0.90 | -0.16 | -0.27 | -0.98 |
| YDR121W   | DPB4  | 12226 | 13623 | 0.90 | -0.16 | -0.27 | -0.98 |
| YML013C-A |       | 3370  | 3755  | 0.90 | -0.16 | -0.27 | -0.98 |
| YLR142W   | PUT1  | 4934  | 5498  | 0.90 | -0.16 | -0.27 | -0.98 |
| YPL048W   | CAM1  | 22510 | 25087 | 0.90 | -0.16 | -0.27 | -0.98 |
| YDR320C   |       | 3862  | 4305  | 0.90 | -0.16 | -0.27 | -0.98 |
| YBR164C   | ARL1  | 13699 | 15271 | 0.90 | -0.16 | -0.27 | -0.98 |
| YKL018W   |       | 8779  | 9787  | 0.90 | -0.16 | -0.27 | -0.98 |
| YLR173W   |       | 8860  | 9877  | 0.90 | -0.16 | -0.27 | -0.98 |
| YMR041C   |       | 5850  | 6522  | 0.90 | -0.16 | -0.27 | -0.98 |
| YOR059C   |       | 2848  | 3175  | 0.90 | -0.16 | -0.27 | -0.98 |
| YLR299W   | ECM38 | 5165  | 5759  | 0.90 | -0.16 | -0.27 | -0.98 |
| YBR256C   | RIB5  | 11627 | 12967 | 0.90 | -0.16 | -0.27 | -0.98 |
| YPR173C   | VPS4  | 17547 | 19571 | 0.90 | -0.16 | -0.27 | -0.98 |
| YJR104C   | SOD1  | 28350 | 31627 | 0.90 | -0.16 | -0.27 | -0.98 |
| YLR140W   |       | 8611  | 9607  | 0.90 | -0.16 | -0.27 | -0.98 |
| YKL224C   |       | 1563  | 1744  | 0.90 | -0.16 | -0.27 | -0.98 |
| YGL109W   |       | 8235  | 9192  | 0.90 | -0.16 | -0.27 | -0.99 |
| YML007W   | YAP1  | 22690 | 25329 | 0.90 | -0.16 | -0.27 | -0.99 |
| YER081W   | SER3  | 2790  | 3116  | 0.90 | -0.16 | -0.27 | -0.99 |
| YKR018C   |       | 12170 | 13596 | 0.90 | -0.16 | -0.27 | -0.99 |
| YER120W   | SCS2  | 22172 | 24777 | 0.89 | -0.16 | -0.27 | -0.99 |
| YNL326C   |       | 2793  | 3121  | 0.89 | -0.16 | -0.27 | -0.99 |
| YMR221C   |       | 3672  | 4105  | 0.89 | -0.16 | -0.27 | -0.99 |
| YER178W   | PDA1  | 21388 | 23917 | 0.89 | -0.16 | -0.27 | -1.00 |
| YER057C   | HIG1  | 13468 | 15063 | 0.89 | -0.16 | -0.27 | -1.00 |
| YAL065C   |       | 3662  | 4096  | 0.89 | -0.16 | -0.27 | -1.00 |
| YJL097W   |       | 13532 | 15140 | 0.89 | -0.16 | -0.27 | -1.00 |
| YLR423C   |       | 1691  | 1892  | 0.89 | -0.16 | -0.27 | -1.00 |
| YML058C-A |       | 3258  | 3645  | 0.89 | -0.16 | -0.27 | -1.00 |



|         |        |       |       |      |       |       |       |
|---------|--------|-------|-------|------|-------|-------|-------|
| YGL200C | EMP24  | 31733 | 35507 | 0.89 | -0.16 | -0.27 | -1.00 |
| YHR013C | ARD1   | 11319 | 12667 | 0.89 | -0.16 | -0.27 | -1.00 |
| YKL202W |        | 1021  | 1143  | 0.89 | -0.16 | -0.27 | -1.00 |
| YOR148C | SPP2   | 6321  | 7077  | 0.89 | -0.16 | -0.28 | -1.00 |
| YLR348C | DIC1   | 9918  | 11108 | 0.89 | -0.16 | -0.28 | -1.00 |
| YDR169C | STB3   | 6969  | 7807  | 0.89 | -0.16 | -0.28 | -1.00 |
| YBR137W |        | 8375  | 9382  | 0.89 | -0.16 | -0.28 | -1.00 |
| YJL064W |        | 15634 | 17517 | 0.89 | -0.16 | -0.28 | -1.01 |
| YGL091C | NBP35  | 10674 | 11961 | 0.89 | -0.16 | -0.28 | -1.01 |
| YGL041C |        | 14217 | 15934 | 0.89 | -0.16 | -0.28 | -1.01 |
| YOR161C |        | 5487  | 6151  | 0.89 | -0.16 | -0.28 | -1.01 |
| YOR102W |        | 11199 | 12555 | 0.89 | -0.16 | -0.28 | -1.01 |
| YJL164C | SRA3   | 8321  | 9329  | 0.89 | -0.16 | -0.28 | -1.01 |
| YDR293C | SSD1   | 1583  | 1775  | 0.89 | -0.17 | -0.28 | -1.01 |
| YNL323W |        | 16785 | 18820 | 0.89 | -0.17 | -0.28 | -1.01 |
| YPR170C |        | 5580  | 6259  | 0.89 | -0.17 | -0.28 | -1.01 |
| YDR027C | LUV1   | 1509  | 1693  | 0.89 | -0.17 | -0.28 | -1.01 |
| YIL072W | HOP1   | 2134  | 2394  | 0.89 | -0.17 | -0.28 | -1.01 |
| YGL189C | RPS26A | 34077 | 38233 | 0.89 | -0.17 | -0.28 | -1.01 |
| YNR034W | SOL1   | 8756  | 9824  | 0.89 | -0.17 | -0.28 | -1.01 |
| YOR301W | RAX1   | 2202  | 2471  | 0.89 | -0.17 | -0.28 | -1.01 |
| YKL084W |        | 7643  | 8576  | 0.89 | -0.17 | -0.28 | -1.01 |
| YLR107W |        | 10198 | 11443 | 0.89 | -0.17 | -0.28 | -1.01 |
| YBR285W |        | 1928  | 2163  | 0.89 | -0.17 | -0.28 | -1.01 |
| YER161C | SPT2   | 5701  | 6399  | 0.89 | -0.17 | -0.28 | -1.01 |
| YOL085C |        | 828   | 930   | 0.89 | -0.17 | -0.28 | -1.02 |
| YJL088W | ARG3   | 6383  | 7166  | 0.89 | -0.17 | -0.28 | -1.02 |
| YMR324C |        | 2626  | 2949  | 0.89 | -0.17 | -0.28 | -1.02 |
| YML029W |        | 1867  | 2097  | 0.89 | -0.17 | -0.28 | -1.02 |
| YGR155W | CYS4   | 26031 | 29236 | 0.89 | -0.17 | -0.28 | -1.02 |
| YBR120C | CBP6   | 7234  | 8126  | 0.89 | -0.17 | -0.28 | -1.02 |
| YOL149W | DCP1   | 14234 | 15991 | 0.89 | -0.17 | -0.28 | -1.02 |
| YAL003W | EFB1   | 49176 | 55248 | 0.89 | -0.17 | -0.28 | -1.02 |
| YKL119C | VPH2   | 10517 | 11818 | 0.89 | -0.17 | -0.28 | -1.02 |
| YFRO24C |        | 13144 | 14772 | 0.89 | -0.17 | -0.28 | -1.02 |
| YKL076C |        | 8284  | 9315  | 0.89 | -0.17 | -0.28 | -1.02 |

|           |        |       |       |      |       |       |       |
|-----------|--------|-------|-------|------|-------|-------|-------|
| YDR079W   | PET100 | 3610  | 4060  | 0.89 | -0.17 | -0.28 | -1.02 |
| YNR030W   | ECM39  | 16395 | 18443 | 0.89 | -0.17 | -0.28 | -1.03 |
| YLR292C   | SEC72  | 17664 | 19872 | 0.89 | -0.17 | -0.28 | -1.03 |
| YKL169C   |        | 15993 | 17993 | 0.89 | -0.17 | -0.28 | -1.03 |
| YPL124W   | NIP29  | 11591 | 13041 | 0.89 | -0.17 | -0.28 | -1.03 |
| YJL142C   |        | 6977  | 7851  | 0.89 | -0.17 | -0.28 | -1.03 |
| YER050C   |        | 3032  | 3412  | 0.89 | -0.17 | -0.28 | -1.03 |
| YOL071W   |        | 15739 | 17711 | 0.89 | -0.17 | -0.28 | -1.03 |
| YER177W   | BMH1   | 32801 | 36916 | 0.89 | -0.17 | -0.28 | -1.03 |
| YOR133W   | EFT1   | 18843 | 21209 | 0.89 | -0.17 | -0.28 | -1.03 |
| YOR176W   | HEM15  | 7497  | 8439  | 0.89 | -0.17 | -0.28 | -1.03 |
| YNR050C   | LYS9   | 26578 | 29926 | 0.89 | -0.17 | -0.28 | -1.03 |
| YEL037C   | RAD23  | 5456  | 6144  | 0.89 | -0.17 | -0.28 | -1.03 |
| YCLX09W   |        | 7184  | 8090  | 0.89 | -0.17 | -0.28 | -1.03 |
| YBR293W   |        | 14640 | 16488 | 0.89 | -0.17 | -0.28 | -1.03 |
| YLR066W   | SPC3   | 12120 | 13651 | 0.89 | -0.17 | -0.28 | -1.03 |
| YBR217W   | APG12  | 8543  | 9624  | 0.89 | -0.17 | -0.28 | -1.03 |
| YPR176C   | BET2   | 4442  | 5004  | 0.89 | -0.17 | -0.28 | -1.03 |
| YHR009C   |        | 6581  | 7417  | 0.89 | -0.17 | -0.28 | -1.04 |
| YOR111W   |        | 13665 | 15402 | 0.89 | -0.17 | -0.29 | -1.04 |
| YNL011C   |        | 2618  | 2951  | 0.89 | -0.17 | -0.29 | -1.04 |
| YNL239W   | LAP3   | 10556 | 11900 | 0.89 | -0.17 | -0.29 | -1.04 |
| YOR075W   | UFE1   | 11349 | 12795 | 0.89 | -0.17 | -0.29 | -1.04 |
| YNL192W   | CHS1   | 9481  | 10689 | 0.89 | -0.17 | -0.29 | -1.04 |
| YLL053C   |        | 5234  | 5902  | 0.89 | -0.17 | -0.29 | -1.04 |
| YBR030W   |        | 1310  | 1477  | 0.89 | -0.17 | -0.29 | -1.04 |
| YAL020C   | ATS1   | 5162  | 5822  | 0.89 | -0.17 | -0.29 | -1.04 |
| YLR379W   |        | 6180  | 6971  | 0.89 | -0.17 | -0.29 | -1.04 |
| YCRO29C-A |        | 25173 | 28393 | 0.89 | -0.17 | -0.29 | -1.04 |
| YNL079C   | TPM1   | 16354 | 18447 | 0.89 | -0.17 | -0.29 | -1.04 |
| YDR286C   |        | 7969  | 8989  | 0.89 | -0.17 | -0.29 | -1.04 |
| YIR019C   | MUC1   | 373   | 421   | 0.89 | -0.17 | -0.29 | -1.04 |
| YER179W   | DMC1   | 1859  | 2098  | 0.89 | -0.17 | -0.29 | -1.04 |
| YDR288W   |        | 12688 | 14319 | 0.89 | -0.17 | -0.29 | -1.04 |
| YDR063W   |        | 4995  | 5638  | 0.89 | -0.17 | -0.29 | -1.04 |
| YNL251C   | NRD1   | 14798 | 16704 | 0.89 | -0.17 | -0.29 | -1.04 |

|         |       |       |       |      |       |       |       |
|---------|-------|-------|-------|------|-------|-------|-------|
| YOL008W |       | 3139  | 3543  | 0.89 | -0.17 | -0.29 | -1.04 |
| YDL020C | RPN4  | 8163  | 9214  | 0.89 | -0.17 | -0.29 | -1.04 |
| YPRO23C |       | 9128  | 10304 | 0.89 | -0.17 | -0.29 | -1.04 |
| YGRO63C | SPT4  | 9862  | 11133 | 0.89 | -0.17 | -0.29 | -1.04 |
| YPR174C |       | 1844  | 2082  | 0.89 | -0.18 | -0.29 | -1.05 |
| YNL327W | EGT2  | 25217 | 28470 | 0.89 | -0.18 | -0.29 | -1.05 |
| YLR416C |       | 2118  | 2391  | 0.89 | -0.18 | -0.29 | -1.05 |
| YHL030W | ECM29 | 3103  | 3504  | 0.89 | -0.18 | -0.29 | -1.05 |
| YPR193C | HPA2  | 1705  | 1926  | 0.89 | -0.18 | -0.29 | -1.05 |
| YAR023C |       | 2610  | 2949  | 0.88 | -0.18 | -0.29 | -1.05 |
| YKR010C | TOF2  | 1357  | 1534  | 0.88 | -0.18 | -0.29 | -1.05 |
| YGL121C |       | 4912  | 5551  | 0.88 | -0.18 | -0.29 | -1.05 |
| YHR166C | CDC23 | 4411  | 4986  | 0.88 | -0.18 | -0.29 | -1.05 |
| YDR256C | CTA1  | 2303  | 2604  | 0.88 | -0.18 | -0.29 | -1.05 |
| YDL233W |       | 3664  | 4144  | 0.88 | -0.18 | -0.29 | -1.05 |
| YNL276C |       | 2487  | 2813  | 0.88 | -0.18 | -0.29 | -1.06 |
| YPL037C | EGD1  | 35765 | 40459 | 0.88 | -0.18 | -0.29 | -1.06 |
| YMR253C |       | 3575  | 4046  | 0.88 | -0.18 | -0.29 | -1.06 |
| YEL040W | UTR2  | 13039 | 14759 | 0.88 | -0.18 | -0.29 | -1.06 |
| YIL007C |       | 7634  | 8642  | 0.88 | -0.18 | -0.29 | -1.06 |
| YDR173C | ARG82 | 5234  | 5927  | 0.88 | -0.18 | -0.29 | -1.06 |
| YFR025C | HIS2  | 19188 | 21728 | 0.88 | -0.18 | -0.29 | -1.06 |
| YOR109W | INP53 | 8451  | 9570  | 0.88 | -0.18 | -0.29 | -1.06 |
| YGL261C |       | 2301  | 2607  | 0.88 | -0.18 | -0.29 | -1.06 |
| YKR100C |       | 2437  | 2762  | 0.88 | -0.18 | -0.29 | -1.06 |
| YJR099W | YUH1  | 6349  | 7194  | 0.88 | -0.18 | -0.29 | -1.06 |
| YMR267W | PPA2  | 2556  | 2897  | 0.88 | -0.18 | -0.29 | -1.06 |
| YGR295C | COS6  | 21631 | 24523 | 0.88 | -0.18 | -0.29 | -1.07 |
| YLR075W | RPL10 | 53117 | 60231 | 0.88 | -0.18 | -0.29 | -1.07 |
| YLR053C |       | 2763  | 3133  | 0.88 | -0.18 | -0.29 | -1.07 |
| YBR295W | PCA1  | 6991  | 7929  | 0.88 | -0.18 | -0.29 | -1.07 |
| YJL161W |       | 1137  | 1290  | 0.88 | -0.18 | -0.29 | -1.07 |
| YGL048C | RPT6  | 14186 | 16091 | 0.88 | -0.18 | -0.29 | -1.07 |
| YDR100W |       | 17064 | 19363 | 0.88 | -0.18 | -0.29 | -1.07 |
| YOL064C | MET22 | 18658 | 21180 | 0.88 | -0.18 | -0.30 | -1.07 |
| YER080W |       | 10694 | 12141 | 0.88 | -0.18 | -0.30 | -1.07 |

|         |        |       |       |      |       |       |       |
|---------|--------|-------|-------|------|-------|-------|-------|
| YJL174W | KRE9   | 6774  | 7692  | 0.88 | -0.18 | -0.30 | -1.08 |
| YBR197C |        | 9817  | 11149 | 0.88 | -0.18 | -0.30 | -1.08 |
| YJL106W | IME2   | 1508  | 1713  | 0.88 | -0.18 | -0.30 | -1.08 |
| YJL140W | RPB4   | 26411 | 30006 | 0.88 | -0.18 | -0.30 | -1.08 |
| YBR056W |        | 591   | 671   | 0.88 | -0.18 | -0.30 | -1.08 |
| YKR034W | DAL80  | 2424  | 2754  | 0.88 | -0.18 | -0.30 | -1.08 |
| YER017C | AFG3   | 5485  | 6232  | 0.88 | -0.18 | -0.30 | -1.08 |
| YDL098C | SNU23  | 10269 | 11674 | 0.88 | -0.18 | -0.30 | -1.08 |
| YFL020C | PAU5   | 1832  | 2083  | 0.88 | -0.19 | -0.30 | -1.08 |
| YBR080C | SEC18  | 4659  | 5298  | 0.88 | -0.19 | -0.30 | -1.08 |
| YKLO03C | MRP17  | 10362 | 11784 | 0.88 | -0.19 | -0.30 | -1.08 |
| YDR232W | HEM1   | 17802 | 20245 | 0.88 | -0.19 | -0.30 | -1.08 |
| YGR146C |        | 14466 | 16454 | 0.88 | -0.19 | -0.30 | -1.08 |
| YOR181W | LAS17  | 2846  | 3240  | 0.88 | -0.19 | -0.30 | -1.09 |
| YDR129C | SAC6   | 15150 | 17248 | 0.88 | -0.19 | -0.30 | -1.09 |
| YML083C |        | 3039  | 3460  | 0.88 | -0.19 | -0.30 | -1.09 |
| YLR428C |        | 6075  | 6917  | 0.88 | -0.19 | -0.30 | -1.09 |
| YMR056C | AAC1   | 2335  | 2659  | 0.88 | -0.19 | -0.30 | -1.09 |
| YGR175C | ERG1   | 23737 | 27038 | 0.88 | -0.19 | -0.30 | -1.09 |
| YGR032W | GSC2   | 2159  | 2459  | 0.88 | -0.19 | -0.30 | -1.09 |
| YNL043C |        | 8402  | 9572  | 0.88 | -0.19 | -0.30 | -1.09 |
| YKL159C | RCN1   | 2921  | 3330  | 0.88 | -0.19 | -0.30 | -1.10 |
| YGL179C |        | 2178  | 2483  | 0.88 | -0.19 | -0.30 | -1.10 |
| YKL061W |        | 2246  | 2561  | 0.88 | -0.19 | -0.30 | -1.10 |
| YDR510W | SMT3   | 20980 | 23922 | 0.88 | -0.19 | -0.30 | -1.10 |
| YDL086W |        | 14745 | 16817 | 0.88 | -0.19 | -0.30 | -1.10 |
| YJR016C | ILV3   | 21506 | 24530 | 0.88 | -0.19 | -0.30 | -1.10 |
| YOR045W | TOM6   | 20422 | 23295 | 0.88 | -0.19 | -0.30 | -1.10 |
| YDL008W | APC11  | 5193  | 5925  | 0.88 | -0.19 | -0.30 | -1.10 |
| YPL246C |        | 13538 | 15445 | 0.88 | -0.19 | -0.30 | -1.10 |
| YOL143C | RIB4   | 7649  | 8727  | 0.88 | -0.19 | -0.30 | -1.10 |
| YPL144W | SNR17B | 14258 | 16269 | 0.88 | -0.19 | -0.30 | -1.10 |
| YNL008C |        | 10495 | 11977 | 0.88 | -0.19 | -0.30 | -1.10 |
| YAR028W |        | 20452 | 23341 | 0.88 | -0.19 | -0.30 | -1.10 |
| YGL072C |        | 865   | 988   | 0.88 | -0.19 | -0.30 | -1.10 |
| YOR067C | ALG8   | 5243  | 5986  | 0.88 | -0.19 | -0.30 | -1.10 |

|           |       |       |       |      |       |       |       |
|-----------|-------|-------|-------|------|-------|-------|-------|
| YMR090W   |       | 4355  | 4973  | 0.88 | -0.19 | -0.30 | -1.10 |
| YKL123W   |       | 3453  | 3943  | 0.88 | -0.19 | -0.30 | -1.10 |
| YLR159W   |       | 1498  | 1711  | 0.88 | -0.19 | -0.30 | -1.11 |
| YPL071C   |       | 4474  | 5110  | 0.88 | -0.19 | -0.30 | -1.11 |
| YHR099W   | TRA1  | 28189 | 32198 | 0.88 | -0.19 | -0.30 | -1.11 |
| YML067C   |       | 23956 | 27367 | 0.88 | -0.19 | -0.30 | -1.11 |
| YER102W   | RPS8B | 57249 | 65406 | 0.88 | -0.19 | -0.30 | -1.11 |
| YLR408C   |       | 1304  | 1490  | 0.88 | -0.19 | -0.30 | -1.11 |
| YPL107W   |       | 2451  | 2801  | 0.88 | -0.19 | -0.30 | -1.11 |
| YJR059W   | PTK2  | 3753  | 4289  | 0.87 | -0.19 | -0.31 | -1.11 |
| YPR151C   |       | 2595  | 2966  | 0.87 | -0.19 | -0.31 | -1.11 |
| YDR252W   | BTT1  | 6321  | 7227  | 0.87 | -0.19 | -0.31 | -1.11 |
| YBR071W   |       | 14869 | 17003 | 0.87 | -0.19 | -0.31 | -1.11 |
| YER004W   |       | 13308 | 15220 | 0.87 | -0.19 | -0.31 | -1.11 |
| YPL148C   | PPT2  | 10474 | 11983 | 0.87 | -0.19 | -0.31 | -1.11 |
| YBL101W-A |       | 17494 | 20015 | 0.87 | -0.19 | -0.31 | -1.11 |
| YPRO79W   |       | 4236  | 4848  | 0.87 | -0.19 | -0.31 | -1.12 |
| YOL119C   |       | 2919  | 3340  | 0.87 | -0.19 | -0.31 | -1.12 |
| YJR004C   | SAG1  | 6856  | 7847  | 0.87 | -0.19 | -0.31 | -1.12 |
| YLR031W   |       | 694   | 795   | 0.87 | -0.20 | -0.31 | -1.12 |
| YBL006C   |       | 18571 | 21262 | 0.87 | -0.20 | -0.31 | -1.12 |
| YGR294W   |       | 902   | 1033  | 0.87 | -0.20 | -0.31 | -1.12 |
| YHR118C   | ORC6  | 2537  | 2905  | 0.87 | -0.20 | -0.31 | -1.12 |
| YNL156C   |       | 24241 | 27755 | 0.87 | -0.20 | -0.31 | -1.12 |
| YLR199C   |       | 15437 | 17677 | 0.87 | -0.20 | -0.31 | -1.12 |
| YDL195W   | SEC31 | 15277 | 17499 | 0.87 | -0.20 | -0.31 | -1.12 |
| YLR037C   |       | 4603  | 5273  | 0.87 | -0.20 | -0.31 | -1.12 |
| YKL171W   |       | 1821  | 2087  | 0.87 | -0.20 | -0.31 | -1.12 |
| YIL154C   | IMP2' | 4048  | 4640  | 0.87 | -0.20 | -0.31 | -1.12 |
| YDR040C   | ENA1  | 3394  | 3891  | 0.87 | -0.20 | -0.31 | -1.12 |
| YHR106W   | TRR2  | 12555 | 14395 | 0.87 | -0.20 | -0.31 | -1.13 |
| YGR049W   | SCM4  | 6966  | 7988  | 0.87 | -0.20 | -0.31 | -1.13 |
| YGL039W   |       | 9249  | 10607 | 0.87 | -0.20 | -0.31 | -1.13 |
| YMR002W   |       | 31837 | 36513 | 0.87 | -0.20 | -0.31 | -1.13 |
| YDR410C   | STE14 | 7349  | 8432  | 0.87 | -0.20 | -0.31 | -1.13 |
| YGR136W   |       | 31549 | 36199 | 0.87 | -0.20 | -0.31 | -1.13 |

|         |        |       |       |      |       |       |       |
|---------|--------|-------|-------|------|-------|-------|-------|
| YOL099C |        | 1496  | 1716  | 0.87 | -0.20 | -0.31 | -1.13 |
| YGL065C | ALG2   | 2247  | 2579  | 0.87 | -0.20 | -0.31 | -1.13 |
| YILO44C |        | 31542 | 36205 | 0.87 | -0.20 | -0.31 | -1.13 |
| YJL001W | PRE3   | 14764 | 16955 | 0.87 | -0.20 | -0.31 | -1.13 |
| YNL003C | PET8   | 5754  | 6608  | 0.87 | -0.20 | -0.31 | -1.13 |
| YPL152W | RRD2   | 9882  | 11351 | 0.87 | -0.20 | -0.31 | -1.14 |
| YML102W | CAC2   | 12097 | 13895 | 0.87 | -0.20 | -0.31 | -1.14 |
| YOR079C | ATX2   | 11021 | 12660 | 0.87 | -0.20 | -0.31 | -1.14 |
| YMR180C | CTL1   | 5243  | 6023  | 0.87 | -0.20 | -0.31 | -1.14 |
| YMR255W | GFD1   | 19887 | 22847 | 0.87 | -0.20 | -0.31 | -1.14 |
| YML116W | ATR1   | 17468 | 20073 | 0.87 | -0.20 | -0.31 | -1.14 |
| YKRO01C | VPS1   | 2619  | 3010  | 0.87 | -0.20 | -0.31 | -1.14 |
| YOR150W | MRPL23 | 11366 | 13062 | 0.87 | -0.20 | -0.31 | -1.14 |
| YLR161W |        | 30595 | 35163 | 0.87 | -0.20 | -0.31 | -1.14 |
| YPR203W |        | 5106  | 5869  | 0.87 | -0.20 | -0.31 | -1.14 |
| YBL074C | AAR2   | 1627  | 1870  | 0.87 | -0.20 | -0.31 | -1.14 |
| YAL024C | LTE1   | 447   | 514   | 0.87 | -0.20 | -0.31 | -1.14 |
| YML131W |        | 15698 | 18054 | 0.87 | -0.20 | -0.31 | -1.14 |
| YGL161C |        | 16123 | 18544 | 0.87 | -0.20 | -0.31 | -1.14 |
| YKRO65C |        | 8761  | 10078 | 0.87 | -0.20 | -0.31 | -1.14 |
| YDR086C | SSS1   | 28700 | 33031 | 0.87 | -0.20 | -0.32 | -1.15 |
| YHR080C |        | 19783 | 22772 | 0.87 | -0.20 | -0.32 | -1.15 |
| YILO48W | NEO1   | 5184  | 5970  | 0.87 | -0.20 | -0.32 | -1.15 |
| YJR010W | MET3   | 2046  | 2358  | 0.87 | -0.20 | -0.32 | -1.15 |
| YGL051W |        | 9300  | 10719 | 0.87 | -0.20 | -0.32 | -1.15 |
| YDL192W | ARF1   | 31843 | 36724 | 0.87 | -0.21 | -0.32 | -1.16 |
| YJL180C | ATP12  | 19437 | 22417 | 0.87 | -0.21 | -0.32 | -1.16 |
| YKL052C |        | 9069  | 10460 | 0.87 | -0.21 | -0.32 | -1.16 |
| YDL076C |        | 10752 | 12409 | 0.87 | -0.21 | -0.32 | -1.16 |
| YDL175C |        | 12556 | 14495 | 0.87 | -0.21 | -0.32 | -1.16 |
| YNL263C | YIF1   | 18174 | 20980 | 0.87 | -0.21 | -0.32 | -1.16 |
| YNR042W |        | 11144 | 12867 | 0.87 | -0.21 | -0.32 | -1.16 |
| YAL016W | TPD3   | 24210 | 27959 | 0.87 | -0.21 | -0.32 | -1.16 |
| YIL117C |        | 8757  | 10115 | 0.87 | -0.21 | -0.32 | -1.16 |
| YGR122W |        | 10280 | 11874 | 0.87 | -0.21 | -0.32 | -1.16 |
| YGL095C | VPS45  | 8124  | 9389  | 0.87 | -0.21 | -0.32 | -1.17 |

|         |       |       |       |      |       |       |       |
|---------|-------|-------|-------|------|-------|-------|-------|
| YER119C |       | 3620  | 4184  | 0.87 | -0.21 | -0.32 | -1.17 |
| YDL134C | PPH21 | 22271 | 25752 | 0.86 | -0.21 | -0.32 | -1.17 |
| YLR165C |       | 21800 | 25212 | 0.86 | -0.21 | -0.32 | -1.17 |
| YELO59W |       | 621   | 718   | 0.86 | -0.21 | -0.32 | -1.17 |
| YKL161C |       | 6204  | 7177  | 0.86 | -0.21 | -0.32 | -1.17 |
| YCR070W |       | 8049  | 9314  | 0.86 | -0.21 | -0.32 | -1.17 |
| YNL267W | PIK1  | 10485 | 12133 | 0.86 | -0.21 | -0.32 | -1.17 |
| YFR018C |       | 3464  | 4011  | 0.86 | -0.21 | -0.32 | -1.18 |
| YKL040C | NFU1  | 9050  | 10485 | 0.86 | -0.21 | -0.32 | -1.18 |
| YER009W | NTF2  | 33090 | 38361 | 0.86 | -0.21 | -0.33 | -1.18 |
| YBR052C |       | 563   | 653   | 0.86 | -0.21 | -0.33 | -1.18 |
| YDR051C |       | 2816  | 3265  | 0.86 | -0.21 | -0.33 | -1.18 |
| YPL061W | ALD6  | 35430 | 41082 | 0.86 | -0.21 | -0.33 | -1.19 |
| YCLX05C |       | 5628  | 6528  | 0.86 | -0.21 | -0.33 | -1.19 |
| YJL152W |       | 11422 | 13248 | 0.86 | -0.21 | -0.33 | -1.19 |
| YML130C | ERO1  | 4581  | 5314  | 0.86 | -0.21 | -0.33 | -1.19 |
| YOR184W | SER1  | 11099 | 12877 | 0.86 | -0.21 | -0.33 | -1.19 |
| YHR168W |       | 2746  | 3187  | 0.86 | -0.21 | -0.33 | -1.19 |
| YBR231C |       | 8190  | 9504  | 0.86 | -0.21 | -0.33 | -1.19 |
| YLR064W |       | 9572  | 11115 | 0.86 | -0.22 | -0.33 | -1.19 |
| YLR050C |       | 6813  | 7913  | 0.86 | -0.22 | -0.33 | -1.19 |
| YFR030W | MET10 | 4522  | 5253  | 0.86 | -0.22 | -0.33 | -1.19 |
| YGR154C |       | 6437  | 7478  | 0.86 | -0.22 | -0.33 | -1.19 |
| YML036W |       | 18366 | 21337 | 0.86 | -0.22 | -0.33 | -1.20 |
| YDL081C | RPP1A | 33233 | 38617 | 0.86 | -0.22 | -0.33 | -1.20 |
| YGR046W |       | 3364  | 3910  | 0.86 | -0.22 | -0.33 | -1.20 |
| YNL159C |       | 2521  | 2931  | 0.86 | -0.22 | -0.33 | -1.20 |
| YELO58W | PCM1  | 11129 | 12944 | 0.86 | -0.22 | -0.33 | -1.20 |
| YAR033W |       | 4319  | 5028  | 0.86 | -0.22 | -0.33 | -1.21 |
| YML030W |       | 21744 | 25317 | 0.86 | -0.22 | -0.33 | -1.21 |
| YDL120W | YFH1  | 20521 | 23893 | 0.86 | -0.22 | -0.33 | -1.21 |
| YJL143W | TIM17 | 10551 | 12285 | 0.86 | -0.22 | -0.33 | -1.21 |
| YBL068W | PRS4  | 45907 | 53458 | 0.86 | -0.22 | -0.33 | -1.21 |
| YER142C | MAG1  | 3584  | 4174  | 0.86 | -0.22 | -0.33 | -1.21 |
| YDR236C | FMN1  | 4764  | 5550  | 0.86 | -0.22 | -0.33 | -1.21 |
| YOR071C |       | 1584  | 1846  | 0.86 | -0.22 | -0.33 | -1.21 |

|         |            |       |       |      |       |       |       |
|---------|------------|-------|-------|------|-------|-------|-------|
| YCL028W | RNQ1       | 17169 | 20004 | 0.86 | -0.22 | -0.33 | -1.21 |
| YPR167C | MET16      | 729   | 849   | 0.86 | -0.22 | -0.33 | -1.21 |
| YGL079W |            | 12701 | 14802 | 0.86 | -0.22 | -0.33 | -1.21 |
| YMR275C | BUL1       | 2249  | 2621  | 0.86 | -0.22 | -0.33 | -1.21 |
| YNL215W |            | 4431  | 5164  | 0.86 | -0.22 | -0.33 | -1.21 |
| YOL110W | SHR5       | 3073  | 3582  | 0.86 | -0.22 | -0.33 | -1.21 |
| YJL154C | VPS35      | 3591  | 4186  | 0.86 | -0.22 | -0.33 | -1.21 |
| YHR123W | EPT1       | 2623  | 3059  | 0.86 | -0.22 | -0.33 | -1.21 |
| YER038C |            | 3891  | 4539  | 0.86 | -0.22 | -0.33 | -1.22 |
| YPL188W | POS5       | 15251 | 17793 | 0.86 | -0.22 | -0.33 | -1.22 |
| YPLO84W | BRO1       | 12950 | 15109 | 0.86 | -0.22 | -0.33 | -1.22 |
| YELO38W | UTR4       | 24153 | 28180 | 0.86 | -0.22 | -0.33 | -1.22 |
| YDR204W | COQ4       | 5450  | 6360  | 0.86 | -0.22 | -0.34 | -1.22 |
| YKL157W | APE2       | 5840  | 6816  | 0.86 | -0.22 | -0.34 | -1.22 |
| YMR009W |            | 12271 | 14323 | 0.86 | -0.22 | -0.34 | -1.22 |
| YLR155C | ASP3-1     | 9221  | 10765 | 0.86 | -0.22 | -0.34 | -1.22 |
| YELO07W |            | 10190 | 11900 | 0.86 | -0.22 | -0.34 | -1.22 |
| YOR213C | SAS5       | 13008 | 15196 | 0.86 | -0.22 | -0.34 | -1.22 |
| YBR199W | KTR4       | 29233 | 34152 | 0.86 | -0.22 | -0.34 | -1.22 |
| YDL185W | TFP1       | 36685 | 42865 | 0.86 | -0.22 | -0.34 | -1.23 |
| YOR159C | SME1       | 850   | 994   | 0.86 | -0.23 | -0.34 | -1.23 |
| YGL089C | MF(ALPHA)2 | 11722 | 13705 | 0.86 | -0.23 | -0.34 | -1.23 |
| YPRO62W | FCY1       | 26051 | 30461 | 0.86 | -0.23 | -0.34 | -1.23 |
| YGR206W |            | 8563  | 10014 | 0.86 | -0.23 | -0.34 | -1.23 |
| YIL111W | COX5B      | 8339  | 9752  | 0.86 | -0.23 | -0.34 | -1.23 |
| YGR222W | PET54      | 15643 | 18302 | 0.85 | -0.23 | -0.34 | -1.23 |
| YGR118W | RPS23A     | 45010 | 52672 | 0.85 | -0.23 | -0.34 | -1.23 |
| YHR141C | RPL42B     | 3539  | 4142  | 0.85 | -0.23 | -0.34 | -1.23 |
| YBR160W | CDC28      | 29254 | 34236 | 0.85 | -0.23 | -0.34 | -1.23 |
| YPR108W | RPN7       | 25192 | 29491 | 0.85 | -0.23 | -0.34 | -1.24 |
| YPLO46C | ELC1       | 5897  | 6904  | 0.85 | -0.23 | -0.34 | -1.24 |
| YBR070C |            | 6180  | 7236  | 0.85 | -0.23 | -0.34 | -1.24 |
| YMR271C | URA10      | 5952  | 6970  | 0.85 | -0.23 | -0.34 | -1.24 |
| YBR214W | SDS24      | 1945  | 2278  | 0.85 | -0.23 | -0.34 | -1.24 |
| YJL184W |            | 19017 | 22274 | 0.85 | -0.23 | -0.34 | -1.24 |
| YLR187W |            | 33192 | 38890 | 0.85 | -0.23 | -0.34 | -1.24 |



|         |        |       |       |      |       |       |       |
|---------|--------|-------|-------|------|-------|-------|-------|
| YER091C | MET6   | 14833 | 17379 | 0.85 | -0.23 | -0.34 | -1.24 |
| YDR350C | TCM10  | 2982  | 3494  | 0.85 | -0.23 | -0.34 | -1.24 |
| YGR050C |        | 2284  | 2677  | 0.85 | -0.23 | -0.34 | -1.24 |
| YJR123W | RPS5   | 31777 | 37241 | 0.85 | -0.23 | -0.34 | -1.24 |
| YNL237W | YTP1   | 2826  | 3312  | 0.85 | -0.23 | -0.34 | -1.24 |
| YPL034W |        | 9303  | 10904 | 0.85 | -0.23 | -0.34 | -1.24 |
| YCL033C |        | 3836  | 4498  | 0.85 | -0.23 | -0.34 | -1.24 |
| YDR318W | MCM21  | 8515  | 9987  | 0.85 | -0.23 | -0.34 | -1.24 |
| YER068W | MOT2   | 6504  | 7629  | 0.85 | -0.23 | -0.34 | -1.25 |
| YAL053W |        | 1218  | 1429  | 0.85 | -0.23 | -0.34 | -1.25 |
| YNL069C | RPL16B | 28242 | 33164 | 0.85 | -0.23 | -0.34 | -1.25 |
| YLR209C |        | 12641 | 14847 | 0.85 | -0.23 | -0.34 | -1.25 |
| YFL064C |        | 2757  | 3239  | 0.85 | -0.23 | -0.34 | -1.25 |
| YKL100C |        | 5219  | 6132  | 0.85 | -0.23 | -0.34 | -1.25 |
| YPR145W | ASN1   | 54504 | 64044 | 0.85 | -0.23 | -0.35 | -1.25 |
| YDR072C | IPT1   | 14720 | 17311 | 0.85 | -0.23 | -0.35 | -1.26 |
| YML022W | APT1   | 41643 | 48991 | 0.85 | -0.23 | -0.35 | -1.26 |
| YOR324C |        | 2684  | 3158  | 0.85 | -0.23 | -0.35 | -1.26 |
| YMR318C |        | 37918 | 44638 | 0.85 | -0.24 | -0.35 | -1.26 |
| YCR009C | RVS161 | 14729 | 17346 | 0.85 | -0.24 | -0.35 | -1.27 |
| YOR198C | BFR1   | 11266 | 13268 | 0.85 | -0.24 | -0.35 | -1.27 |
| YDL125C | HNT1   | 13184 | 15527 | 0.85 | -0.24 | -0.35 | -1.27 |
| YOR152C |        | 372   | 438   | 0.85 | -0.24 | -0.35 | -1.27 |
| YPR054W | SMK1   | 2815  | 3316  | 0.85 | -0.24 | -0.35 | -1.27 |
| YJL100W |        | 6418  | 7564  | 0.85 | -0.24 | -0.35 | -1.27 |
| YPL204W | HRR25  | 29360 | 34609 | 0.85 | -0.24 | -0.35 | -1.27 |
| YJL080C | SCP160 | 18347 | 21629 | 0.85 | -0.24 | -0.35 | -1.27 |
| YNL253W |        | 10535 | 12421 | 0.85 | -0.24 | -0.35 | -1.27 |
| YGR037C | ACB1   | 19438 | 22928 | 0.85 | -0.24 | -0.35 | -1.27 |
| YNL307C | MCK1   | 30667 | 36183 | 0.85 | -0.24 | -0.35 | -1.28 |
| YLR110C |        | 25870 | 30535 | 0.85 | -0.24 | -0.35 | -1.28 |
| YLR324W |        | 3949  | 4662  | 0.85 | -0.24 | -0.35 | -1.28 |
| YGR250C |        | 11565 | 13653 | 0.85 | -0.24 | -0.35 | -1.28 |
| YDL132W | CDC53  | 6744  | 7963  | 0.85 | -0.24 | -0.35 | -1.28 |
| YLR059C | YNT20  | 15768 | 18621 | 0.85 | -0.24 | -0.35 | -1.28 |
| YLR119W | SRN2   | 6921  | 8174  | 0.85 | -0.24 | -0.35 | -1.28 |

|         |       |       |       |      |       |       |       |
|---------|-------|-------|-------|------|-------|-------|-------|
| YLR025W | SNF7  | 11435 | 13505 | 0.85 | -0.24 | -0.35 | -1.28 |
| YIL140W | SRO4  | 8998  | 10627 | 0.85 | -0.24 | -0.35 | -1.28 |
| YLR332W | MID2  | 9912  | 11711 | 0.85 | -0.24 | -0.35 | -1.28 |
| YML001W | YPT7  | 26332 | 31144 | 0.85 | -0.24 | -0.35 | -1.29 |
| YKL073W | LHS1  | 1382  | 1636  | 0.84 | -0.24 | -0.36 | -1.29 |
| YGR253C | PUP2  | 14262 | 16884 | 0.84 | -0.24 | -0.36 | -1.29 |
| YJL062W | LAS21 | 14489 | 17153 | 0.84 | -0.24 | -0.36 | -1.29 |
| YER020W | GPA2  | 2373  | 2810  | 0.84 | -0.24 | -0.36 | -1.29 |
| YGL013C | PDR1  | 9624  | 11396 | 0.84 | -0.24 | -0.36 | -1.30 |
| YBR175W |       | 26204 | 31033 | 0.84 | -0.24 | -0.36 | -1.30 |
| YMR250W |       | 1550  | 1836  | 0.84 | -0.24 | -0.36 | -1.30 |
| YAL045C |       | 19479 | 23077 | 0.84 | -0.24 | -0.36 | -1.30 |
| YBR263W | SHM1  | 23396 | 27725 | 0.84 | -0.24 | -0.36 | -1.30 |
| YJL124C | LSM1  | 31396 | 37210 | 0.84 | -0.25 | -0.36 | -1.30 |
| YML101C |       | 7768  | 9212  | 0.84 | -0.25 | -0.36 | -1.30 |
| YDR085C | AFR1  | 1773  | 2103  | 0.84 | -0.25 | -0.36 | -1.30 |
| YDL157C |       | 15598 | 18502 | 0.84 | -0.25 | -0.36 | -1.30 |
| YCR027C | RSG1  | 9461  | 11224 | 0.84 | -0.25 | -0.36 | -1.30 |
| YBL094C |       | 857   | 1017  | 0.84 | -0.25 | -0.36 | -1.31 |
| YOR163W |       | 4757  | 5645  | 0.84 | -0.25 | -0.36 | -1.31 |
| YIL062C | ARC15 | 30578 | 36286 | 0.84 | -0.25 | -0.36 | -1.31 |
| YOR219C | STE13 | 6992  | 8298  | 0.84 | -0.25 | -0.36 | -1.31 |
| YIL136W | OM45  | 2770  | 3287  | 0.84 | -0.25 | -0.36 | -1.31 |
| YKL153W |       | 29828 | 35400 | 0.84 | -0.25 | -0.36 | -1.31 |
| YGL010W |       | 2012  | 2389  | 0.84 | -0.25 | -0.36 | -1.31 |
| YOL162W |       | 783   | 930   | 0.84 | -0.25 | -0.36 | -1.31 |
| YMR022W | QRI8  | 8994  | 10678 | 0.84 | -0.25 | -0.36 | -1.31 |
| YGR258C | RAD2  | 3959  | 4702  | 0.84 | -0.25 | -0.36 | -1.31 |
| YMR199W | CLN1  | 6701  | 7959  | 0.84 | -0.25 | -0.36 | -1.31 |
| YER044C |       | 33953 | 40352 | 0.84 | -0.25 | -0.36 | -1.31 |
| YPL013C |       | 17643 | 20975 | 0.84 | -0.25 | -0.36 | -1.32 |
| YKL086W |       | 6753  | 8029  | 0.84 | -0.25 | -0.36 | -1.32 |
| YJL128C | PBS2  | 10953 | 13022 | 0.84 | -0.25 | -0.36 | -1.32 |
| YER100W | UBC6  | 11564 | 13749 | 0.84 | -0.25 | -0.36 | -1.32 |
| YLR462W |       | 5979  | 7110  | 0.84 | -0.25 | -0.36 | -1.32 |
| YJL003W |       | 3684  | 4383  | 0.84 | -0.25 | -0.36 | -1.32 |

|         |        |       |       |      |       |       |       |
|---------|--------|-------|-------|------|-------|-------|-------|
| YOR215C |        | 23148 | 27541 | 0.84 | -0.25 | -0.36 | -1.32 |
| YLR163C | MAS1   | 23234 | 27666 | 0.84 | -0.25 | -0.36 | -1.32 |
| YLR104W |        | 5814  | 6926  | 0.84 | -0.25 | -0.36 | -1.33 |
| YBR158W | ICS4   | 31267 | 37248 | 0.84 | -0.25 | -0.36 | -1.33 |
| YBL038W | MRPL16 | 27009 | 32188 | 0.84 | -0.25 | -0.37 | -1.33 |
| YNR036C |        | 19347 | 23064 | 0.84 | -0.25 | -0.37 | -1.33 |
| YJL031C | BET4   | 7599  | 9061  | 0.84 | -0.25 | -0.37 | -1.33 |
| YMR072W | ABF2   | 13401 | 15982 | 0.84 | -0.25 | -0.37 | -1.33 |
| YEL034W | HYP2   | 34195 | 40810 | 0.84 | -0.26 | -0.37 | -1.34 |
| YKR068C | BET3   | 10805 | 12900 | 0.84 | -0.26 | -0.37 | -1.34 |
| YOR332W | VMA4   | 29066 | 34711 | 0.84 | -0.26 | -0.37 | -1.34 |
| YKL207W |        | 12712 | 15191 | 0.84 | -0.26 | -0.37 | -1.34 |
| YBL082C | RHK1   | 1874  | 2240  | 0.84 | -0.26 | -0.37 | -1.34 |
| YNL093W | YPT53  | 351   | 420   | 0.84 | -0.26 | -0.37 | -1.35 |
| YER143W | DDI1   | 5008  | 5988  | 0.84 | -0.26 | -0.37 | -1.35 |
| YGR055W | MUP1   | 17136 | 20496 | 0.84 | -0.26 | -0.37 | -1.35 |
| YPL057C | SUR1   | 4406  | 5270  | 0.84 | -0.26 | -0.37 | -1.35 |
| YBR106W | PHO88  | 32647 | 39052 | 0.84 | -0.26 | -0.37 | -1.35 |
| YPL054W | LEE1   | 1837  | 2198  | 0.84 | -0.26 | -0.37 | -1.35 |
| YLR421C |        | 14085 | 16850 | 0.84 | -0.26 | -0.37 | -1.35 |
| YHL002W |        | 9843  | 11780 | 0.84 | -0.26 | -0.37 | -1.35 |
| YGR279C | SCW4   | 38502 | 46085 | 0.84 | -0.26 | -0.37 | -1.35 |
| YBR082C | UBC4   | 12961 | 15515 | 0.84 | -0.26 | -0.37 | -1.35 |
| YLR227C |        | 7966  | 9538  | 0.84 | -0.26 | -0.37 | -1.35 |
| YJL107C |        | 1333  | 1596  | 0.84 | -0.26 | -0.37 | -1.35 |
| YNL071W | LAT1   | 12786 | 15313 | 0.83 | -0.26 | -0.37 | -1.35 |
| YJL073W | JEM1   | 2518  | 3017  | 0.83 | -0.26 | -0.37 | -1.36 |
| YPL087W | YDC1   | 5552  | 6652  | 0.83 | -0.26 | -0.37 | -1.36 |
| YLR138W | NHA1   | 14056 | 16845 | 0.83 | -0.26 | -0.37 | -1.36 |
| YDL026W |        | 7538  | 9036  | 0.83 | -0.26 | -0.37 | -1.36 |
| YJR025C | BNA1   | 9184  | 11015 | 0.83 | -0.26 | -0.37 | -1.36 |
| YKR091W | SRL3   | 6544  | 7849  | 0.83 | -0.26 | -0.37 | -1.36 |
| YBR269C |        | 12206 | 14642 | 0.83 | -0.26 | -0.37 | -1.36 |
| YOR193W |        | 7973  | 9573  | 0.83 | -0.26 | -0.38 | -1.37 |
| YAL042W | FUN9   | 21263 | 25534 | 0.83 | -0.26 | -0.38 | -1.37 |
| YOL038W | PRE6   | 23802 | 28583 | 0.83 | -0.26 | -0.38 | -1.37 |

|           |        |       |       |      |       |       |       |
|-----------|--------|-------|-------|------|-------|-------|-------|
| YNR022C   |        | 22916 | 27525 | 0.83 | -0.26 | -0.38 | -1.37 |
| YIL123W   | SIM1   | 20394 | 24505 | 0.83 | -0.26 | -0.38 | -1.37 |
| YCRX21C   |        | 6611  | 7946  | 0.83 | -0.27 | -0.38 | -1.37 |
| YELO26W   | SNU13  | 44003 | 52890 | 0.83 | -0.27 | -0.38 | -1.37 |
| YER058W   | PET117 | 9653  | 11607 | 0.83 | -0.27 | -0.38 | -1.38 |
| YDR084C   |        | 10440 | 12559 | 0.83 | -0.27 | -0.38 | -1.38 |
| YER189W   |        | 3434  | 4131  | 0.83 | -0.27 | -0.38 | -1.38 |
| YPL163C   | SVS1   | 10470 | 12597 | 0.83 | -0.27 | -0.38 | -1.38 |
| YHR096C   | HXT5   | 18984 | 22841 | 0.83 | -0.27 | -0.38 | -1.38 |
| YBR132C   | AGP2   | 1710  | 2058  | 0.83 | -0.27 | -0.38 | -1.38 |
| YLR429W   | CRN1   | 7739  | 9313  | 0.83 | -0.27 | -0.38 | -1.38 |
| YDL059C   | RAD59  | 1103  | 1328  | 0.83 | -0.27 | -0.38 | -1.38 |
| YLR464W   |        | 7493  | 9022  | 0.83 | -0.27 | -0.38 | -1.38 |
| YHR122W   |        | 8883  | 10703 | 0.83 | -0.27 | -0.38 | -1.39 |
| YGR210C   |        | 23017 | 27748 | 0.83 | -0.27 | -0.38 | -1.39 |
| YKL178C   | STE3   | 5636  | 6800  | 0.83 | -0.27 | -0.38 | -1.39 |
| YKLO44W   |        | 2355  | 2842  | 0.83 | -0.27 | -0.38 | -1.39 |
| YDL128W   | VCX1   | 32064 | 38712 | 0.83 | -0.27 | -0.38 | -1.40 |
| YNL010W   |        | 43152 | 52110 | 0.83 | -0.27 | -0.38 | -1.40 |
| YDR328C   | SKP1   | 35655 | 43060 | 0.83 | -0.27 | -0.38 | -1.40 |
| YHR039C-B |        | 14411 | 17408 | 0.83 | -0.27 | -0.38 | -1.40 |
| YPL114W   |        | 2529  | 3055  | 0.83 | -0.27 | -0.38 | -1.40 |
| YBR126C   | TPS1   | 5608  | 6775  | 0.83 | -0.27 | -0.39 | -1.40 |
| YKL206C   |        | 6868  | 8299  | 0.83 | -0.27 | -0.39 | -1.40 |
| YDR099W   | BMH2   | 21336 | 25784 | 0.83 | -0.27 | -0.39 | -1.40 |
| YBL040C   | ERD2   | 14749 | 17838 | 0.83 | -0.27 | -0.39 | -1.41 |
| YPR197C   |        | 8813  | 10666 | 0.83 | -0.28 | -0.39 | -1.41 |
| YDR294C   | DPL1   | 17498 | 21186 | 0.83 | -0.28 | -0.39 | -1.41 |
| YLR089C   |        | 8716  | 10554 | 0.83 | -0.28 | -0.39 | -1.41 |
| YLR340W   | RPP0   | 18470 | 22372 | 0.83 | -0.28 | -0.39 | -1.41 |
| YJL126W   | NIT2   | 10699 | 12960 | 0.83 | -0.28 | -0.39 | -1.41 |
| YGL153W   | PEX14  | 13587 | 16467 | 0.83 | -0.28 | -0.39 | -1.42 |
| YIR037W   | HYR1   | 8049  | 9759  | 0.82 | -0.28 | -0.39 | -1.42 |
| YLR207W   | HRD3   | 6373  | 7727  | 0.82 | -0.28 | -0.39 | -1.42 |
| YPR078C   |        | 3065  | 3720  | 0.82 | -0.28 | -0.39 | -1.42 |
| YFLO16C   | MDJ1   | 20154 | 24468 | 0.82 | -0.28 | -0.39 | -1.43 |

|           |        |       |       |      |       |       |       |
|-----------|--------|-------|-------|------|-------|-------|-------|
| YJR045C   | SSC1   | 4816  | 5849  | 0.82 | -0.28 | -0.39 | -1.43 |
| YPR053C   |        | 6103  | 7413  | 0.82 | -0.28 | -0.39 | -1.43 |
| YHL036W   | MUP3   | 2180  | 2649  | 0.82 | -0.28 | -0.39 | -1.43 |
| YBL036C   |        | 39847 | 48414 | 0.82 | -0.28 | -0.39 | -1.43 |
| YCL056C   |        | 5065  | 6156  | 0.82 | -0.28 | -0.39 | -1.43 |
| YGR213C   | RTA1   | 1226  | 1491  | 0.82 | -0.28 | -0.39 | -1.43 |
| YHR069C   | RRP4   | 28537 | 34721 | 0.82 | -0.28 | -0.40 | -1.44 |
| YMR312W   |        | 10394 | 12647 | 0.82 | -0.28 | -0.40 | -1.44 |
| YML054C   | CYB2   | 2828  | 3442  | 0.82 | -0.28 | -0.40 | -1.44 |
| YGL009C   | LEU1   | 42137 | 51312 | 0.82 | -0.28 | -0.40 | -1.44 |
| YHR202W   |        | 8630  | 10512 | 0.82 | -0.28 | -0.40 | -1.44 |
| YER051W   |        | 4299  | 5237  | 0.82 | -0.28 | -0.40 | -1.44 |
| YFR010W   | UBP6   | 10276 | 12518 | 0.82 | -0.28 | -0.40 | -1.44 |
| YAL055W   |        | 15977 | 19463 | 0.82 | -0.28 | -0.40 | -1.44 |
| YDR400W   |        | 8302  | 10114 | 0.82 | -0.28 | -0.40 | -1.44 |
| YJL192C   |        | 19137 | 23315 | 0.82 | -0.28 | -0.40 | -1.44 |
| YKL195W   |        | 10999 | 13403 | 0.82 | -0.29 | -0.40 | -1.45 |
| YHR136C   | SPL2   | 6329  | 7713  | 0.82 | -0.29 | -0.40 | -1.45 |
| YKR002W   | PAP1   | 16481 | 20086 | 0.82 | -0.29 | -0.40 | -1.45 |
| YPR107C   | YTH1   | 3281  | 3999  | 0.82 | -0.29 | -0.40 | -1.45 |
| YGR086C   |        | 38350 | 46747 | 0.82 | -0.29 | -0.40 | -1.45 |
| YLL060C   | GTT2   | 3866  | 4715  | 0.82 | -0.29 | -0.40 | -1.45 |
| YGL221C   | NIF3   | 10673 | 13025 | 0.82 | -0.29 | -0.40 | -1.45 |
| YFL005W   | SEC4   | 17322 | 21140 | 0.82 | -0.29 | -0.40 | -1.45 |
| YPL244C   |        | 12606 | 15389 | 0.82 | -0.29 | -0.40 | -1.46 |
| YOR236W   | DFR1   | 14275 | 17432 | 0.82 | -0.29 | -0.40 | -1.46 |
| YLL023C   |        | 12063 | 14734 | 0.82 | -0.29 | -0.40 | -1.46 |
| YGL135W   | RPL1B  | 38075 | 46607 | 0.82 | -0.29 | -0.40 | -1.47 |
| YDR382W   | RPP2B  | 41255 | 50505 | 0.82 | -0.29 | -0.40 | -1.47 |
| YHR206W   | SKN7   | 759   | 929   | 0.82 | -0.29 | -0.40 | -1.47 |
| YFL046W   |        | 3843  | 4707  | 0.82 | -0.29 | -0.41 | -1.47 |
| YNL300W   |        | 8633  | 10575 | 0.82 | -0.29 | -0.41 | -1.47 |
| YOR167C   | RPS28A | 34452 | 42212 | 0.82 | -0.29 | -0.41 | -1.47 |
| YDR214W   |        | 12764 | 15639 | 0.82 | -0.29 | -0.41 | -1.47 |
| YDL147W   | RPN5   | 27137 | 33251 | 0.82 | -0.29 | -0.41 | -1.47 |
| YJR010C-A | SPC1   | 9807  | 12019 | 0.82 | -0.29 | -0.41 | -1.48 |

|           |       |       |       |      |       |       |       |
|-----------|-------|-------|-------|------|-------|-------|-------|
| YGR026W   |       | 15471 | 18961 | 0.82 | -0.29 | -0.41 | -1.48 |
| YNL055C   | POR1  | 28813 | 35328 | 0.82 | -0.29 | -0.41 | -1.48 |
| YDL097C   | RPN6  | 10211 | 12520 | 0.82 | -0.29 | -0.41 | -1.48 |
| YBR096W   |       | 20932 | 25689 | 0.81 | -0.30 | -0.41 | -1.48 |
| YDL010W   |       | 10394 | 12761 | 0.81 | -0.30 | -0.41 | -1.49 |
| YPL220W   | RPL1A | 33677 | 41353 | 0.81 | -0.30 | -0.41 | -1.49 |
| YNL217W   |       | 15850 | 19464 | 0.81 | -0.30 | -0.41 | -1.49 |
| YGR254W   | ENO1  | 53262 | 65434 | 0.81 | -0.30 | -0.41 | -1.49 |
| YPL004C   |       | 26675 | 32778 | 0.81 | -0.30 | -0.41 | -1.49 |
| YBR243C   | ALG7  | 10504 | 12917 | 0.81 | -0.30 | -0.41 | -1.49 |
| YBR171W   | SEC66 | 20443 | 25140 | 0.81 | -0.30 | -0.41 | -1.49 |
| YKLO46C   |       | 3450  | 4247  | 0.81 | -0.30 | -0.41 | -1.50 |
| YDR411C   |       | 11973 | 14738 | 0.81 | -0.30 | -0.41 | -1.50 |
| YDR542W   |       | 3193  | 3934  | 0.81 | -0.30 | -0.41 | -1.50 |
| YER030W   |       | 12358 | 15233 | 0.81 | -0.30 | -0.41 | -1.51 |
| YOL165C   | AAD15 | 4684  | 5775  | 0.81 | -0.30 | -0.41 | -1.51 |
| YLR079W   | SIC1  | 15735 | 19407 | 0.81 | -0.30 | -0.42 | -1.51 |
| YBR149W   | ARA1  | 14990 | 18489 | 0.81 | -0.30 | -0.42 | -1.51 |
| YNL160W   | YGP1  | 18297 | 22570 | 0.81 | -0.30 | -0.42 | -1.51 |
| YPR165W   | RHO1  | 33449 | 41282 | 0.81 | -0.30 | -0.42 | -1.51 |
| YMR314W   | PRE5  | 31606 | 39016 | 0.81 | -0.30 | -0.42 | -1.51 |
| YPL010W   | RET3  | 18116 | 22382 | 0.81 | -0.31 | -0.42 | -1.52 |
| YJL048C   |       | 10123 | 12509 | 0.81 | -0.31 | -0.42 | -1.52 |
| YPL098C   |       | 18139 | 22418 | 0.81 | -0.31 | -0.42 | -1.52 |
| YNR075W   | COS10 | 1564  | 1933  | 0.81 | -0.31 | -0.42 | -1.52 |
| YBL002W   | HTB2  | 52406 | 64792 | 0.81 | -0.31 | -0.42 | -1.52 |
| YPL221W   | BOP1  | 6126  | 7575  | 0.81 | -0.31 | -0.42 | -1.52 |
| YGL080W   |       | 8518  | 10534 | 0.81 | -0.31 | -0.42 | -1.52 |
| YGR152C   | RSR1  | 21727 | 26870 | 0.81 | -0.31 | -0.42 | -1.52 |
| YEL046C   | GLY1  | 10666 | 13192 | 0.81 | -0.31 | -0.42 | -1.52 |
| YER052C   | HOM3  | 1753  | 2170  | 0.81 | -0.31 | -0.42 | -1.53 |
| YPR181C   | SEC23 | 26323 | 32598 | 0.81 | -0.31 | -0.42 | -1.53 |
| YGL106W   | MLC1  | 3765  | 4663  | 0.81 | -0.31 | -0.42 | -1.53 |
| YML117W-A |       | 4123  | 5108  | 0.81 | -0.31 | -0.42 | -1.53 |
| YGL053W   |       | 12526 | 15529 | 0.81 | -0.31 | -0.42 | -1.54 |
| YCL035C   | GRX1  | 13321 | 16518 | 0.81 | -0.31 | -0.42 | -1.54 |

|           |        |       |       |      |       |       |       |
|-----------|--------|-------|-------|------|-------|-------|-------|
| YOR041C   |        | 3580  | 4441  | 0.81 | -0.31 | -0.42 | -1.54 |
| YKL107W   |        | 2044  | 2537  | 0.81 | -0.31 | -0.42 | -1.54 |
| YGR120C   | SEC35  | 19807 | 24590 | 0.81 | -0.31 | -0.42 | -1.54 |
| YLR391W   |        | 5423  | 6734  | 0.81 | -0.31 | -0.42 | -1.54 |
| YLR364W   |        | 3344  | 4154  | 0.80 | -0.31 | -0.43 | -1.55 |
| YBR301W   |        | 5139  | 6387  | 0.80 | -0.31 | -0.43 | -1.55 |
| YER019C-A | SBH2   | 34007 | 42289 | 0.80 | -0.31 | -0.43 | -1.55 |
| YPR199C   | ARR1   | 14034 | 17458 | 0.80 | -0.31 | -0.43 | -1.55 |
| YOR189W   |        | 16943 | 21081 | 0.80 | -0.32 | -0.43 | -1.55 |
| YML133C   |        | 23795 | 29609 | 0.80 | -0.32 | -0.43 | -1.56 |
| YBR101C   |        | 12439 | 15482 | 0.80 | -0.32 | -0.43 | -1.56 |
| YNR076W   | PAU6   | 4236  | 5275  | 0.80 | -0.32 | -0.43 | -1.56 |
| YKL137W   |        | 15929 | 19848 | 0.80 | -0.32 | -0.43 | -1.56 |
| YNR004W   |        | 2421  | 3017  | 0.80 | -0.32 | -0.43 | -1.56 |
| YDR513W   | TTR1   | 13087 | 16338 | 0.80 | -0.32 | -0.43 | -1.57 |
| YLR043C   | TRX1   | 31483 | 39315 | 0.80 | -0.32 | -0.43 | -1.57 |
| YDL110C   |        | 17013 | 21247 | 0.80 | -0.32 | -0.43 | -1.57 |
| YAL028W   |        | 11199 | 13986 | 0.80 | -0.32 | -0.43 | -1.57 |
| YMR034C   |        | 1396  | 1744  | 0.80 | -0.32 | -0.43 | -1.58 |
| YKL145W   | RPT1   | 17445 | 21804 | 0.80 | -0.32 | -0.43 | -1.58 |
| YNL293W   | MSB3   | 9565  | 11958 | 0.80 | -0.32 | -0.43 | -1.58 |
| YGR156W   |        | 5668  | 7090  | 0.80 | -0.32 | -0.44 | -1.58 |
| YMR297W   | PRC1   | 28420 | 35562 | 0.80 | -0.32 | -0.44 | -1.58 |
| YJL178C   |        | 15869 | 19863 | 0.80 | -0.32 | -0.44 | -1.59 |
| YER131W   | RPS26B | 51441 | 64398 | 0.80 | -0.32 | -0.44 | -1.59 |
| YFL014W   | HSP12  | 4459  | 5584  | 0.80 | -0.32 | -0.44 | -1.59 |
| YIL124W   | AYR1   | 17245 | 21600 | 0.80 | -0.32 | -0.44 | -1.59 |
| YNL245C   |        | 11368 | 14243 | 0.80 | -0.33 | -0.44 | -1.59 |
| YDL137W   | ARF2   | 52216 | 65437 | 0.80 | -0.33 | -0.44 | -1.59 |
| YDR378C   | LSM6   | 8362  | 10481 | 0.80 | -0.33 | -0.44 | -1.59 |
| YOL011W   | PLB3   | 15260 | 19129 | 0.80 | -0.33 | -0.44 | -1.59 |
| YOR223W   |        | 13223 | 16584 | 0.80 | -0.33 | -0.44 | -1.60 |
| YER063W   | THO1   | 17237 | 21634 | 0.80 | -0.33 | -0.44 | -1.60 |
| YGL137W   | SEC27  | 16319 | 20495 | 0.80 | -0.33 | -0.44 | -1.60 |
| YIRO43C   |        | 12502 | 15710 | 0.80 | -0.33 | -0.44 | -1.61 |
| YKL080W   | VMA5   | 27695 | 34812 | 0.80 | -0.33 | -0.44 | -1.61 |

|         |       |       |       |      |       |       |       |
|---------|-------|-------|-------|------|-------|-------|-------|
| YHR156C |       | 3329  | 4186  | 0.80 | -0.33 | -0.44 | -1.61 |
| YDL143W | CCT4  | 32370 | 40711 | 0.80 | -0.33 | -0.44 | -1.61 |
| YKRO13W | PRY2  | 1513  | 1904  | 0.79 | -0.33 | -0.44 | -1.61 |
| YER087W |       | 3671  | 4619  | 0.79 | -0.33 | -0.44 | -1.61 |
| YGR248W | SOL4  | 1789  | 2252  | 0.79 | -0.33 | -0.44 | -1.61 |
| YLR093C | NYV1  | 25357 | 31912 | 0.79 | -0.33 | -0.44 | -1.61 |
| YGL057C |       | 12056 | 15176 | 0.79 | -0.33 | -0.44 | -1.62 |
| YBR107C | MCM19 | 4072  | 5127  | 0.79 | -0.33 | -0.44 | -1.62 |
| YNL134C |       | 17556 | 22113 | 0.79 | -0.33 | -0.45 | -1.62 |
| YDR380W |       | 4726  | 5957  | 0.79 | -0.33 | -0.45 | -1.62 |
| YDR154C |       | 22139 | 27918 | 0.79 | -0.33 | -0.45 | -1.63 |
| YOR155C |       | 2116  | 2669  | 0.79 | -0.33 | -0.45 | -1.63 |
| YPR167C | MET16 | 5180  | 6539  | 0.79 | -0.34 | -0.45 | -1.63 |
| YLR327C |       | 6826  | 8624  | 0.79 | -0.34 | -0.45 | -1.64 |
| YGL001C |       | 37331 | 47185 | 0.79 | -0.34 | -0.45 | -1.64 |
| YMR292W | GOT1  | 21315 | 26965 | 0.79 | -0.34 | -0.45 | -1.64 |
| YKL196C | YKT6  | 4303  | 5449  | 0.79 | -0.34 | -0.45 | -1.65 |
| YDL141W | BPL1  | 6480  | 8208  | 0.79 | -0.34 | -0.45 | -1.65 |
| YDR391C |       | 7571  | 9594  | 0.79 | -0.34 | -0.45 | -1.65 |
| YDR394W | RPT3  | 10876 | 13787 | 0.79 | -0.34 | -0.45 | -1.65 |
| YLL062C |       | 8931  | 11326 | 0.79 | -0.34 | -0.46 | -1.65 |
| YOR285W |       | 13528 | 17158 | 0.79 | -0.34 | -0.46 | -1.66 |
| YOR225W |       | 16220 | 20587 | 0.79 | -0.34 | -0.46 | -1.66 |
| YHR115C |       | 5547  | 7044  | 0.79 | -0.34 | -0.46 | -1.66 |
| YMR276W | DSK2  | 3176  | 4035  | 0.79 | -0.35 | -0.46 | -1.66 |
| YBR201W | DER1  | 4144  | 5265  | 0.79 | -0.35 | -0.46 | -1.67 |
| YDL135C | RDI1  | 32161 | 40868 | 0.79 | -0.35 | -0.46 | -1.67 |
| YDR262W |       | 17044 | 21665 | 0.79 | -0.35 | -0.46 | -1.67 |
| YDR134C |       | 30565 | 38885 | 0.79 | -0.35 | -0.46 | -1.67 |
| YDR151C | CTH1  | 10793 | 13740 | 0.79 | -0.35 | -0.46 | -1.68 |
| YBR302C | COS2  | 15021 | 19124 | 0.79 | -0.35 | -0.46 | -1.68 |
| YDL127W | PCL2  | 4328  | 5511  | 0.79 | -0.35 | -0.46 | -1.68 |
| YPR127W |       | 5312  | 6768  | 0.78 | -0.35 | -0.46 | -1.68 |
| YNL157W |       | 14145 | 18024 | 0.78 | -0.35 | -0.46 | -1.68 |
| YDR224C | HTB1  | 42574 | 54264 | 0.78 | -0.35 | -0.46 | -1.68 |
| YLR354C | TAL1  | 27221 | 34701 | 0.78 | -0.35 | -0.46 | -1.68 |



|           |       |       |       |      |       |       |       |
|-----------|-------|-------|-------|------|-------|-------|-------|
| YHR180W   |       | 2163  | 2759  | 0.78 | -0.35 | -0.46 | -1.69 |
| YGR186W   | TFG1  | 9003  | 11488 | 0.78 | -0.35 | -0.46 | -1.69 |
| YDL172C   |       | 7329  | 9354  | 0.78 | -0.35 | -0.46 | -1.69 |
| YLR257W   |       | 20212 | 25802 | 0.78 | -0.35 | -0.46 | -1.69 |
| YOR103C   | OST2  | 20547 | 26230 | 0.78 | -0.35 | -0.46 | -1.69 |
| YEL075C   |       | 7032  | 8978  | 0.78 | -0.35 | -0.46 | -1.69 |
| YKR046C   |       | 2602  | 3322  | 0.78 | -0.35 | -0.47 | -1.69 |
| YOR020C   | HSP10 | 30302 | 38717 | 0.78 | -0.35 | -0.47 | -1.69 |
| YAL068C   |       | 6817  | 8711  | 0.78 | -0.35 | -0.47 | -1.69 |
| YCLX04W   |       | 4384  | 5602  | 0.78 | -0.35 | -0.47 | -1.69 |
| YGR028W   | MSP1  | 4148  | 5301  | 0.78 | -0.35 | -0.47 | -1.70 |
| YDL023C   |       | 2320  | 2965  | 0.78 | -0.35 | -0.47 | -1.70 |
| YNL006W   | LST8  | 15817 | 20218 | 0.78 | -0.35 | -0.47 | -1.70 |
| YER079W   |       | 1152  | 1474  | 0.78 | -0.36 | -0.47 | -1.70 |
| YILO42C   |       | 3761  | 4812  | 0.78 | -0.36 | -0.47 | -1.70 |
| YFR052W   | RPN12 | 21062 | 26966 | 0.78 | -0.36 | -0.47 | -1.70 |
| YGL157W   |       | 8077  | 10343 | 0.78 | -0.36 | -0.47 | -1.71 |
| YFR003C   |       | 8670  | 11105 | 0.78 | -0.36 | -0.47 | -1.71 |
| YCR005C   | CIT2  | 6372  | 8171  | 0.78 | -0.36 | -0.47 | -1.71 |
| YER087C-A | SBH1  | 13979 | 17930 | 0.78 | -0.36 | -0.47 | -1.71 |
| YOR348C   | PUT4  | 2621  | 3362  | 0.78 | -0.36 | -0.47 | -1.72 |
| YEL071W   |       | 12468 | 15998 | 0.78 | -0.36 | -0.47 | -1.72 |
| YDR519W   | FKB2  | 9651  | 12385 | 0.78 | -0.36 | -0.47 | -1.72 |
| YOR131C   |       | 10187 | 13099 | 0.78 | -0.36 | -0.48 | -1.73 |
| YJR019C   | TES1  | 5351  | 6883  | 0.78 | -0.36 | -0.48 | -1.73 |
| YGR209C   | TRX2  | 13676 | 17600 | 0.78 | -0.36 | -0.48 | -1.73 |
| YPL112C   |       | 15985 | 20576 | 0.78 | -0.36 | -0.48 | -1.73 |
| YGR268C   |       | 6105  | 7860  | 0.78 | -0.36 | -0.48 | -1.73 |
| YDR230W   |       | 15728 | 20249 | 0.78 | -0.36 | -0.48 | -1.73 |
| YNL063W   |       | 3862  | 4974  | 0.78 | -0.37 | -0.48 | -1.74 |
| YDL126C   | CDC48 | 22354 | 28800 | 0.78 | -0.37 | -0.48 | -1.74 |
| YGL011C   | SCL1  | 29666 | 38229 | 0.78 | -0.37 | -0.48 | -1.74 |
| YKL211C   | TRP3  | 20059 | 25868 | 0.78 | -0.37 | -0.48 | -1.74 |
| YPL170W   |       | 19593 | 25268 | 0.78 | -0.37 | -0.48 | -1.74 |
| YOR230W   | WTM1  | 11631 | 15011 | 0.77 | -0.37 | -0.48 | -1.75 |
| YFLO62W   | COS4  | 16800 | 21687 | 0.77 | -0.37 | -0.48 | -1.75 |

|           |       |       |       |      |       |       |       |
|-----------|-------|-------|-------|------|-------|-------|-------|
| YJR008W   |       | 7135  | 9226  | 0.77 | -0.37 | -0.48 | -1.76 |
| YHL034C   | SBP1  | 21282 | 27536 | 0.77 | -0.37 | -0.48 | -1.76 |
| YOR226C   | ISU2  | 8052  | 10425 | 0.77 | -0.37 | -0.49 | -1.76 |
| YPL218W   | SAR1  | 25830 | 33448 | 0.77 | -0.37 | -0.49 | -1.76 |
| YPL156C   |       | 13420 | 17382 | 0.77 | -0.37 | -0.49 | -1.77 |
| YOR097C   |       | 5208  | 6746  | 0.77 | -0.37 | -0.49 | -1.77 |
| YMR173W-A |       | 6552  | 8488  | 0.77 | -0.37 | -0.49 | -1.77 |
| YMR237W   |       | 6221  | 8060  | 0.77 | -0.37 | -0.49 | -1.77 |
| YML075C   | HMG1  | 16137 | 20923 | 0.77 | -0.37 | -0.49 | -1.77 |
| YBR221C   | PDB1  | 30194 | 39174 | 0.77 | -0.38 | -0.49 | -1.77 |
| YDR071C   |       | 28876 | 37498 | 0.77 | -0.38 | -0.49 | -1.78 |
| YHL048W   | COS8  | 16931 | 21988 | 0.77 | -0.38 | -0.49 | -1.78 |
| YLR229C   | CDC42 | 39718 | 51598 | 0.77 | -0.38 | -0.49 | -1.78 |
| YAL049C   |       | 20361 | 26455 | 0.77 | -0.38 | -0.49 | -1.78 |
| YLR188W   | MDL1  | 12083 | 15709 | 0.77 | -0.38 | -0.49 | -1.79 |
| YJR023C   |       | 6827  | 8877  | 0.77 | -0.38 | -0.49 | -1.79 |
| YPRO65W   | ROX1  | 5143  | 6691  | 0.77 | -0.38 | -0.49 | -1.79 |
| YMR035W   | IMP2  | 2668  | 3472  | 0.77 | -0.38 | -0.49 | -1.79 |
| YBR173C   | UMP1  | 20678 | 26921 | 0.77 | -0.38 | -0.49 | -1.79 |
| YER012W   | PRE1  | 16526 | 21524 | 0.77 | -0.38 | -0.49 | -1.79 |
| YOR099W   | KTR1  | 11278 | 14695 | 0.77 | -0.38 | -0.49 | -1.80 |
| YMR186W   | HSC82 | 7009  | 9134  | 0.77 | -0.38 | -0.49 | -1.80 |
| YGL073W   | HSF1  | 7798  | 10163 | 0.77 | -0.38 | -0.49 | -1.80 |
| YMR039C   | SUB1  | 6134  | 7998  | 0.77 | -0.38 | -0.50 | -1.80 |
| YNR059W   | MNT4  | 1907  | 2490  | 0.77 | -0.38 | -0.50 | -1.81 |
| YIL013C   | PDR11 | 1621  | 2117  | 0.77 | -0.38 | -0.50 | -1.81 |
| YLR186W   |       | 2193  | 2867  | 0.76 | -0.39 | -0.50 | -1.82 |
| YOR185C   | GSP2  | 12398 | 16210 | 0.76 | -0.39 | -0.50 | -1.82 |
| YPL094C   | SEC62 | 28943 | 37843 | 0.76 | -0.39 | -0.50 | -1.82 |
| YKL117W   | SBA1  | 14108 | 18450 | 0.76 | -0.39 | -0.50 | -1.82 |
| YPRO63C   |       | 9594  | 12548 | 0.76 | -0.39 | -0.50 | -1.82 |
| YNL281W   | HCH1  | 30791 | 40341 | 0.76 | -0.39 | -0.50 | -1.83 |
| YOR248W   |       | 11297 | 14804 | 0.76 | -0.39 | -0.50 | -1.83 |
| YOR209C   | NPT1  | 24368 | 31962 | 0.76 | -0.39 | -0.50 | -1.83 |
| YIL016W   | SNL1  | 16001 | 21023 | 0.76 | -0.39 | -0.51 | -1.84 |
| YBR066C   | NRG2  | 2998  | 3941  | 0.76 | -0.39 | -0.51 | -1.84 |

|           |       |       |       |      |       |       |       |
|-----------|-------|-------|-------|------|-------|-------|-------|
| YOR069W   | VPS5  | 8220  | 10811 | 0.76 | -0.40 | -0.51 | -1.85 |
| YGL047W   |       | 14208 | 18689 | 0.76 | -0.40 | -0.51 | -1.85 |
| YBL050W   | SEC17 | 19847 | 26107 | 0.76 | -0.40 | -0.51 | -1.85 |
| YGR132C   | PHB1  | 20902 | 27501 | 0.76 | -0.40 | -0.51 | -1.85 |
| YBR241C   |       | 2250  | 2961  | 0.76 | -0.40 | -0.51 | -1.85 |
| YGR284C   |       | 17433 | 22959 | 0.76 | -0.40 | -0.51 | -1.85 |
| YNL155W   |       | 9308  | 12261 | 0.76 | -0.40 | -0.51 | -1.85 |
| YBR004C   |       | 1191  | 1570  | 0.76 | -0.40 | -0.51 | -1.86 |
| YPL196W   |       | 19982 | 26358 | 0.76 | -0.40 | -0.51 | -1.86 |
| YPL234C   | TFP3  | 18411 | 24304 | 0.76 | -0.40 | -0.51 | -1.87 |
| YJL079C   | PRY1  | 1440  | 1902  | 0.76 | -0.40 | -0.51 | -1.87 |
| YOL032W   |       | 15502 | 20513 | 0.76 | -0.40 | -0.52 | -1.88 |
| YGR008C   | STF2  | 6841  | 9052  | 0.76 | -0.40 | -0.52 | -1.88 |
| YHR138C   |       | 4355  | 5767  | 0.76 | -0.41 | -0.52 | -1.88 |
| YHR191C   | CTF8  | 1930  | 2556  | 0.76 | -0.41 | -0.52 | -1.88 |
| YGL087C   | MMS2  | 8874  | 11751 | 0.76 | -0.41 | -0.52 | -1.88 |
| YDR533C   |       | 12964 | 17185 | 0.75 | -0.41 | -0.52 | -1.89 |
| YDL100C   |       | 16659 | 22089 | 0.75 | -0.41 | -0.52 | -1.89 |
| YAL012W   | CYS3  | 28272 | 37500 | 0.75 | -0.41 | -0.52 | -1.89 |
| YFR050C   | PRE4  | 11325 | 15024 | 0.75 | -0.41 | -0.52 | -1.89 |
| YBR253W   | SRB6  | 18530 | 24588 | 0.75 | -0.41 | -0.52 | -1.89 |
| YJR017C   | ESS1  | 6115  | 8120  | 0.75 | -0.41 | -0.52 | -1.90 |
| YAL030W   | SNC1  | 11433 | 15182 | 0.75 | -0.41 | -0.52 | -1.90 |
| YML092C   | PRE8  | 18119 | 24069 | 0.75 | -0.41 | -0.52 | -1.90 |
| YEL076C-A |       | 10384 | 13802 | 0.75 | -0.41 | -0.52 | -1.90 |
| YIL108W   |       | 6504  | 8660  | 0.75 | -0.41 | -0.53 | -1.91 |
| YGR121C   | MEP1  | 3532  | 4708  | 0.75 | -0.41 | -0.53 | -1.92 |
| YPL206C   |       | 16379 | 21834 | 0.75 | -0.41 | -0.53 | -1.92 |
| YDR258C   | HSP78 | 3546  | 4732  | 0.75 | -0.42 | -0.53 | -1.92 |
| YLR259C   | HSP60 | 25591 | 34165 | 0.75 | -0.42 | -0.53 | -1.92 |
| YNL064C   | YDJ1  | 26726 | 35693 | 0.75 | -0.42 | -0.53 | -1.93 |
| YOR289W   |       | 1855  | 2478  | 0.75 | -0.42 | -0.53 | -1.93 |
| YDR518W   | EUG1  | 3322  | 4439  | 0.75 | -0.42 | -0.53 | -1.93 |
| YDR476C   |       | 5557  | 7427  | 0.75 | -0.42 | -0.53 | -1.93 |
| YDR233C   |       | 27256 | 36430 | 0.75 | -0.42 | -0.53 | -1.93 |
| YOL122C   | SMF1  | 3982  | 5324  | 0.75 | -0.42 | -0.53 | -1.93 |

|         |       |       |       |      |       |       |       |
|---------|-------|-------|-------|------|-------|-------|-------|
| YOR085W | OST3  | 14446 | 19318 | 0.75 | -0.42 | -0.53 | -1.93 |
| YJL035C | TAD2  | 2768  | 3706  | 0.75 | -0.42 | -0.53 | -1.94 |
| YPL088W |       | 11486 | 15392 | 0.75 | -0.42 | -0.53 | -1.94 |
| YER094C | PUP3  | 23686 | 31749 | 0.75 | -0.42 | -0.54 | -1.95 |
| YOL013C | HRD1  | 12272 | 16450 | 0.75 | -0.42 | -0.54 | -1.95 |
| YAL004W |       | 15508 | 20790 | 0.75 | -0.42 | -0.54 | -1.95 |
| YOR007C | SGT2  | 11988 | 16089 | 0.75 | -0.42 | -0.54 | -1.95 |
| YOR117W | RPT5  | 20328 | 27297 | 0.74 | -0.43 | -0.54 | -1.95 |
| YER062C | HOR2  | 3653  | 4917  | 0.74 | -0.43 | -0.54 | -1.97 |
| YCL038C |       | 5076  | 6855  | 0.74 | -0.43 | -0.55 | -1.98 |
| YMR315W |       | 8349  | 11300 | 0.74 | -0.44 | -0.55 | -2.00 |
| YER072W | NRF1  | 38435 | 52090 | 0.74 | -0.44 | -0.55 | -2.00 |
| YPL250C |       | 10700 | 14509 | 0.74 | -0.44 | -0.55 | -2.01 |
| YLR251W |       | 1702  | 2310  | 0.74 | -0.44 | -0.55 | -2.01 |
| YBR099C |       | 3427  | 4652  | 0.74 | -0.44 | -0.55 | -2.01 |
| YPL154C | PEP4  | 27813 | 37777 | 0.74 | -0.44 | -0.55 | -2.01 |
| YBL058W | SHP1  | 21408 | 29121 | 0.74 | -0.44 | -0.56 | -2.02 |
| YDR242W | AMD2  | 1077  | 1466  | 0.73 | -0.44 | -0.56 | -2.03 |
| YDL169C | UGX2  | 3960  | 5390  | 0.73 | -0.44 | -0.56 | -2.03 |
| YOR052C |       | 10592 | 14416 | 0.73 | -0.44 | -0.56 | -2.03 |
| YGL090W | LIF1  | 1295  | 1765  | 0.73 | -0.45 | -0.56 | -2.03 |
| YKL058W | TOA2  | 29260 | 39913 | 0.73 | -0.45 | -0.56 | -2.04 |
| YOR157C | PUP1  | 36827 | 50299 | 0.73 | -0.45 | -0.56 | -2.04 |
| YNL277W | MET2  | 12951 | 17693 | 0.73 | -0.45 | -0.56 | -2.05 |
| YPL078C | ATP4  | 35520 | 48525 | 0.73 | -0.45 | -0.56 | -2.05 |
| YDR055W | PST1  | 969   | 1325  | 0.73 | -0.45 | -0.56 | -2.05 |
| YOR089C | VPS21 | 16945 | 23169 | 0.73 | -0.45 | -0.56 | -2.05 |
| YCL009C | ILV6  | 27315 | 37351 | 0.73 | -0.45 | -0.56 | -2.05 |
| YOL109W | ZEO1  | 15055 | 20604 | 0.73 | -0.45 | -0.57 | -2.05 |
| YGL127C | SOH1  | 12925 | 17714 | 0.73 | -0.45 | -0.57 | -2.06 |
| YFL056C | AAD6  | 6227  | 8539  | 0.73 | -0.46 | -0.57 | -2.07 |
| YHR146W |       | 29405 | 40587 | 0.72 | -0.46 | -0.58 | -2.10 |
| YDR222W |       | 10729 | 14822 | 0.72 | -0.47 | -0.58 | -2.10 |
| YDL193W |       | 14288 | 19782 | 0.72 | -0.47 | -0.58 | -2.12 |
| YPL149W | APG5  | 6297  | 8722  | 0.72 | -0.47 | -0.58 | -2.12 |
| YLR065C |       | 21910 | 30362 | 0.72 | -0.47 | -0.58 | -2.12 |

|         |       |       |       |      |       |       |       |
|---------|-------|-------|-------|------|-------|-------|-------|
| YNL208W |       | 17690 | 24516 | 0.72 | -0.47 | -0.58 | -2.12 |
| YKL065C | YET1  | 8597  | 11917 | 0.72 | -0.47 | -0.58 | -2.12 |
| YCLX08C |       | 879   | 1219  | 0.72 | -0.47 | -0.58 | -2.12 |
| YMR173W | DDR48 | 6826  | 9490  | 0.72 | -0.48 | -0.59 | -2.14 |
| YKL192C | ACP1  | 12437 | 17303 | 0.72 | -0.48 | -0.59 | -2.14 |
| YNL241C | ZWF1  | 21215 | 29533 | 0.72 | -0.48 | -0.59 | -2.14 |
| YPR154W |       | 4053  | 5649  | 0.72 | -0.48 | -0.59 | -2.15 |
| YGL225W | GOG5  | 38068 | 53130 | 0.72 | -0.48 | -0.59 | -2.16 |
| YBR100W |       | 1012  | 1413  | 0.72 | -0.48 | -0.59 | -2.16 |
| YGL105W | ARC1  | 36072 | 50394 | 0.72 | -0.48 | -0.59 | -2.16 |
| YOR385W |       | 11371 | 15888 | 0.72 | -0.48 | -0.59 | -2.16 |
| YOR362C | PRE10 | 21590 | 30169 | 0.72 | -0.48 | -0.60 | -2.16 |
| YDR210W |       | 13512 | 18920 | 0.71 | -0.49 | -0.60 | -2.17 |
| YBR169C | SSE2  | 3762  | 5268  | 0.71 | -0.49 | -0.60 | -2.17 |
| YCL040W | GLK1  | 23017 | 32267 | 0.71 | -0.49 | -0.60 | -2.18 |
| YDR043C | NRG1  | 2072  | 2907  | 0.71 | -0.49 | -0.60 | -2.18 |
| YILO40W |       | 25928 | 36400 | 0.71 | -0.49 | -0.60 | -2.19 |
| YDL070W | BDF2  | 9528  | 13388 | 0.71 | -0.49 | -0.60 | -2.19 |
| YER103W | SSA4  | 7755  | 10913 | 0.71 | -0.49 | -0.61 | -2.20 |
| YCL026C |       | 2643  | 3723  | 0.71 | -0.49 | -0.61 | -2.21 |
| YIL153W | RRD1  | 2246  | 3165  | 0.71 | -0.49 | -0.61 | -2.21 |
| YML011C |       | 8506  | 11988 | 0.71 | -0.50 | -0.61 | -2.21 |
| YILO34C | CAP2  | 25314 | 35680 | 0.71 | -0.50 | -0.61 | -2.21 |
| YOR239W |       | 4118  | 5804  | 0.71 | -0.50 | -0.61 | -2.21 |
| YGR048W | UFD1  | 6958  | 9814  | 0.71 | -0.50 | -0.61 | -2.21 |
| YGR014W | MSB2  | 3941  | 5567  | 0.71 | -0.50 | -0.61 | -2.22 |
| YKRO42W | UTH1  | 32369 | 45784 | 0.71 | -0.50 | -0.61 | -2.23 |
| YLR303W | MET17 | 28696 | 40611 | 0.71 | -0.50 | -0.61 | -2.23 |
| YLR350W |       | 12638 | 17943 | 0.70 | -0.51 | -0.62 | -2.25 |
| YPLO28W | ERG10 | 32853 | 46734 | 0.70 | -0.51 | -0.62 | -2.26 |
| YJL118W |       | 6288  | 8960  | 0.70 | -0.51 | -0.62 | -2.27 |
| YDR059C | UBC5  | 2130  | 3037  | 0.70 | -0.51 | -0.62 | -2.27 |
| YHR150W |       | 8480  | 12100 | 0.70 | -0.51 | -0.63 | -2.27 |
| YOL129W |       | 13475 | 19264 | 0.70 | -0.52 | -0.63 | -2.28 |
| YKL213C | DOA1  | 2916  | 4176  | 0.70 | -0.52 | -0.63 | -2.29 |
| YERO42W | MXR1  | 25055 | 35905 | 0.70 | -0.52 | -0.63 | -2.30 |

|           |       |       |       |      |       |       |       |
|-----------|-------|-------|-------|------|-------|-------|-------|
| YFR004W   | RPN11 | 21858 | 31383 | 0.70 | -0.52 | -0.63 | -2.31 |
| YOL005C   | RPB11 | 21424 | 30793 | 0.70 | -0.52 | -0.64 | -2.31 |
| YMR178W   |       | 13549 | 19482 | 0.70 | -0.52 | -0.64 | -2.31 |
| YLR216C   | CPR6  | 21200 | 30506 | 0.69 | -0.53 | -0.64 | -2.32 |
| YOL019W   |       | 8823  | 12696 | 0.69 | -0.53 | -0.64 | -2.32 |
| YLR378C   | SEC61 | 6890  | 9926  | 0.69 | -0.53 | -0.64 | -2.32 |
| YEL060C   | PRB1  | 1262  | 1822  | 0.69 | -0.53 | -0.64 | -2.34 |
| YCL018W   | LEU2  | 36250 | 52589 | 0.69 | -0.54 | -0.65 | -2.36 |
| YKRO12C   |       | 13871 | 20147 | 0.69 | -0.54 | -0.65 | -2.37 |
| YJL060W   |       | 15131 | 22034 | 0.69 | -0.54 | -0.65 | -2.38 |
| YBR078W   | ECM33 | 28361 | 41455 | 0.68 | -0.55 | -0.66 | -2.40 |
| YLR213C   | CRR1  | 19132 | 27980 | 0.68 | -0.55 | -0.66 | -2.40 |
| YCR013C   |       | 36783 | 53814 | 0.68 | -0.55 | -0.66 | -2.40 |
| YHR181W   |       | 1105  | 1617  | 0.68 | -0.55 | -0.66 | -2.41 |
| YGL038C   | OCH1  | 3938  | 5770  | 0.68 | -0.55 | -0.66 | -2.41 |
| YCR061W   |       | 9237  | 13534 | 0.68 | -0.55 | -0.66 | -2.41 |
| YBL078C   | AUT7  | 10139 | 14876 | 0.68 | -0.55 | -0.67 | -2.42 |
| YDR155C   | CPH1  | 14900 | 21905 | 0.68 | -0.56 | -0.67 | -2.43 |
| YBR162C   |       | 17232 | 25343 | 0.68 | -0.56 | -0.67 | -2.43 |
| YGR110W   |       | 2740  | 4037  | 0.68 | -0.56 | -0.67 | -2.44 |
| YKL163W   | PIR3  | 4774  | 7052  | 0.68 | -0.56 | -0.68 | -2.46 |
| YOL053C-A |       | 2674  | 3952  | 0.68 | -0.56 | -0.68 | -2.46 |
| YGR282C   | BGL2  | 43572 | 64452 | 0.68 | -0.56 | -0.68 | -2.46 |
| YGR080W   | TWF1  | 7362  | 10890 | 0.68 | -0.56 | -0.68 | -2.46 |
| YKL096W   | CWP1  | 22890 | 33894 | 0.68 | -0.57 | -0.68 | -2.47 |
| YDR202C   |       | 1203  | 1782  | 0.68 | -0.57 | -0.68 | -2.47 |
| YGR232W   |       | 14674 | 21775 | 0.67 | -0.57 | -0.68 | -2.48 |
| YKL219W   | COS9  | 2641  | 3924  | 0.67 | -0.57 | -0.68 | -2.49 |
| YNR010W   | CSE2  | 11575 | 17219 | 0.67 | -0.57 | -0.69 | -2.49 |
| YOL163W   |       | 1033  | 1541  | 0.67 | -0.58 | -0.69 | -2.50 |
| YNR069C   |       | 1848  | 2759  | 0.67 | -0.58 | -0.69 | -2.51 |
| YPR159W   | KRE6  | 25442 | 38112 | 0.67 | -0.58 | -0.70 | -2.53 |
| YPR052C   | NHP6A | 19018 | 28490 | 0.67 | -0.58 | -0.70 | -2.53 |
| YDL237W   |       | 761   | 1141  | 0.67 | -0.58 | -0.70 | -2.53 |
| YLR120C   | YPS1  | 4209  | 6316  | 0.67 | -0.59 | -0.70 | -2.54 |
| YMR235C   | RNA1  | 16145 | 24299 | 0.66 | -0.59 | -0.70 | -2.55 |

|         |       |       |       |      |       |       |       |
|---------|-------|-------|-------|------|-------|-------|-------|
| YKL103C | LAP4  | 8294  | 12497 | 0.66 | -0.59 | -0.70 | -2.56 |
| YNL044W | YIP3  | 32551 | 49070 | 0.66 | -0.59 | -0.70 | -2.56 |
| YCL034W |       | 20252 | 30600 | 0.66 | -0.60 | -0.71 | -2.57 |
| YLR370C | ARC18 | 14858 | 22475 | 0.66 | -0.60 | -0.71 | -2.58 |
| YDR309C | GIC2  | 570   | 865   | 0.66 | -0.60 | -0.71 | -2.60 |
| YGL037C |       | 24608 | 37346 | 0.66 | -0.60 | -0.71 | -2.60 |
| YOR247W | SRL1  | 10283 | 15616 | 0.66 | -0.60 | -0.72 | -2.60 |
| YLR121C | YPS3  | 5393  | 8229  | 0.66 | -0.61 | -0.72 | -2.63 |
| YAL008W | FUN14 | 12123 | 18532 | 0.65 | -0.61 | -0.72 | -2.63 |
| YJL158C | CIS3  | 8493  | 13033 | 0.65 | -0.62 | -0.73 | -2.65 |
| YBR244W | AMI1  | 2786  | 4279  | 0.65 | -0.62 | -0.73 | -2.66 |
| YLR432W |       | 14712 | 22660 | 0.65 | -0.62 | -0.74 | -2.67 |
| YOL016C | CMK2  | 2643  | 4075  | 0.65 | -0.62 | -0.74 | -2.68 |
| YGL166W | CUP2  | 7111  | 10982 | 0.65 | -0.63 | -0.74 | -2.69 |
| YGR161C |       | 6878  | 10621 | 0.65 | -0.63 | -0.74 | -2.69 |
| YOR288C | MPD1  | 4969  | 7737  | 0.64 | -0.64 | -0.75 | -2.73 |
| YPR183W | DPM1  | 21349 | 33263 | 0.64 | -0.64 | -0.75 | -2.73 |
| YNL020C | ARK1  | 7784  | 12164 | 0.64 | -0.64 | -0.76 | -2.75 |
| YLR356W |       | 4920  | 7692  | 0.64 | -0.64 | -0.76 | -2.75 |
| YMR040W |       | 2254  | 3536  | 0.64 | -0.65 | -0.76 | -2.77 |
| YFR034C | PHO4  | 2098  | 3305  | 0.63 | -0.66 | -0.77 | -2.79 |
| YNL305C |       | 11152 | 17728 | 0.63 | -0.67 | -0.78 | -2.84 |
| YCL043C | PDI1  | 18544 | 29612 | 0.63 | -0.68 | -0.79 | -2.86 |
| YJL108C |       | 4838  | 7734  | 0.63 | -0.68 | -0.79 | -2.87 |
| YLR225C |       | 25423 | 40882 | 0.62 | -0.69 | -0.80 | -2.90 |
| YHR198C |       | 1516  | 2439  | 0.62 | -0.69 | -0.80 | -2.90 |
| YBR005W |       | 4946  | 7966  | 0.62 | -0.69 | -0.80 | -2.91 |
| YDL022W | GPD1  | 9623  | 15530 | 0.62 | -0.69 | -0.80 | -2.92 |
| YPR158W |       | 8163  | 13176 | 0.62 | -0.69 | -0.80 | -2.92 |
| YPL240C | HSP82 | 8025  | 12966 | 0.62 | -0.69 | -0.80 | -2.93 |
| YIR017C | MET28 | 3922  | 6339  | 0.62 | -0.69 | -0.81 | -2.93 |
| YAR073W |       | 32660 | 53071 | 0.62 | -0.70 | -0.81 | -2.96 |
| YIL074C | SER33 | 39047 | 63646 | 0.61 | -0.70 | -0.82 | -2.97 |
| YHR044C | DOG1  | 5152  | 8410  | 0.61 | -0.71 | -0.82 | -2.98 |
| YOL031C |       | 5979  | 9857  | 0.61 | -0.72 | -0.83 | -3.03 |
| YDL173W |       | 19427 | 32058 | 0.61 | -0.72 | -0.84 | -3.04 |

|           |        |       |       |      |       |       |       |
|-----------|--------|-------|-------|------|-------|-------|-------|
| YPL106C   | SSE1   | 30633 | 50588 | 0.61 | -0.72 | -0.84 | -3.04 |
| YGL184C   |        | 5651  | 9367  | 0.60 | -0.73 | -0.84 | -3.06 |
| YML028W   | TSA1   | 20858 | 34774 | 0.60 | -0.74 | -0.85 | -3.09 |
| YHR216W   | PUR5   | 37483 | 62556 | 0.60 | -0.74 | -0.85 | -3.10 |
| YMR304C-A |        | 6986  | 11715 | 0.60 | -0.75 | -0.86 | -3.12 |
| YBR287W   |        | 38513 | 64623 | 0.60 | -0.75 | -0.86 | -3.12 |
| YOL007C   | CSI2   | 15917 | 26778 | 0.59 | -0.75 | -0.86 | -3.14 |
| YOR027W   | STI1   | 8401  | 14195 | 0.59 | -0.76 | -0.87 | -3.16 |
| YMR184W   |        | 11549 | 19602 | 0.59 | -0.76 | -0.88 | -3.18 |
| YNL007C   | SIS1   | 18316 | 31112 | 0.59 | -0.76 | -0.88 | -3.19 |
| YOR036W   | PEP12  | 7266  | 12388 | 0.59 | -0.77 | -0.88 | -3.21 |
| YAL005C   | SSA1   | 28308 | 48268 | 0.59 | -0.77 | -0.88 | -3.21 |
| YDL072C   |        | 31329 | 53486 | 0.59 | -0.77 | -0.88 | -3.21 |
| YHR148W   | IMP3   | 35219 | 60454 | 0.58 | -0.78 | -0.89 | -3.24 |
| YPL056C   |        | 1675  | 2886  | 0.58 | -0.79 | -0.90 | -3.26 |
| YAR075W   |        | 34152 | 58902 | 0.58 | -0.79 | -0.90 | -3.27 |
| YJL094C   |        | 6137  | 10606 | 0.58 | -0.79 | -0.90 | -3.28 |
| YNR068C   |        | 3787  | 6569  | 0.58 | -0.79 | -0.91 | -3.30 |
| YBL075C   | SSA3   | 2504  | 4481  | 0.56 | -0.84 | -0.95 | -3.46 |
| YLR099C   | ICT1   | 9508  | 17050 | 0.56 | -0.84 | -0.95 | -3.47 |
| YKR011C   |        | 1649  | 2963  | 0.56 | -0.85 | -0.96 | -3.48 |
| YOR220W   |        | 7001  | 12641 | 0.55 | -0.85 | -0.96 | -3.51 |
| YBR072W   | HSP26  | 1385  | 2541  | 0.54 | -0.88 | -0.99 | -3.59 |
| YNL289W   | PCL1   | 15296 | 28238 | 0.54 | -0.88 | -1.00 | -3.62 |
| YJL116C   | NCA3   | 2726  | 5037  | 0.54 | -0.89 | -1.00 | -3.63 |
| YLL024C   | SSA2   | 29740 | 55993 | 0.53 | -0.91 | -1.03 | -3.73 |
| YLL026W   | HSP104 | 10838 | 20521 | 0.53 | -0.92 | -1.03 | -3.76 |
| YNL036W   | NCE103 | 27558 | 53368 | 0.52 | -0.95 | -1.07 | -3.88 |
| YKLO97W-A |        | 17352 | 34160 | 0.51 | -0.98 | -1.09 | -3.96 |
| YKLO01C   | MET14  | 18044 | 36410 | 0.50 | -1.01 | -1.13 | -4.09 |
| YMR316C-A |        | 6545  | 13208 | 0.50 | -1.01 | -1.13 | -4.09 |
| YLR109W   | AHP1   | 24161 | 48847 | 0.49 | -1.02 | -1.13 | -4.10 |
| YBR016W   |        | 8440  | 17090 | 0.49 | -1.02 | -1.13 | -4.11 |
| YJL034W   | KAR2   | 18889 | 38588 | 0.49 | -1.03 | -1.14 | -4.16 |
| YDL124W   |        | 26770 | 54961 | 0.49 | -1.04 | -1.15 | -4.18 |
| YMR305C   | SCW10  | 16521 | 34499 | 0.48 | -1.06 | -1.17 | -4.27 |



|           |       |       |       |      |       |       |       |
|-----------|-------|-------|-------|------|-------|-------|-------|
| YLR202C   |       | 7841  | 16478 | 0.48 | -1.07 | -1.18 | -4.30 |
| YJL144W   |       | 7475  | 15771 | 0.47 | -1.08 | -1.19 | -4.33 |
| YDR171W   | HSP42 | 4570  | 11196 | 0.41 | -1.29 | -1.41 | -5.11 |
| YER035W   |       | 759   | 1875  | 0.40 | -1.31 | -1.42 | -5.15 |
| YGR142W   | BTN2  | 13911 | 35547 | 0.39 | -1.35 | -1.47 | -5.33 |
| YMR316W   |       | 7979  | 21029 | 0.38 | -1.40 | -1.51 | -5.49 |
| YMR251W-A | HOR7  | 23064 | 62743 | 0.37 | -1.44 | -1.56 | -5.66 |
| YBR296C   | PHO89 | 1311  | 3924  | 0.33 | -1.58 | -1.69 | -6.16 |
